# Supplementary material for: Hfq CLASH uncovers sRNA-target interaction networks linked to nutrient availability adaptation
Source: eLife. 2020 May 1;9:e54655. doi: 10.7554/eLife.54655 (PMC7213987; doi:10.7554/eLife.54655)
Supplement: Figure 1—figure supplement 1—source data 1. [file elife-54655-fig1-figsupp1-data1.xlsx]

## Sheet: Figure 1 - figure supplement 1 
Figure 1 - figure supplement 1 A,B
	Hfq-HTF Western Blot:
Figure 1 - figure supplement 1 A,B	Relative quantification of Hfq-HTF expression from Western Blot data:
sample (Optical density)	Biological replicate 1 fold-change in Hfq expression	Biological replicate 2 fold-change in Hfq expression	Mean fold-change	Standard deviation
OD04	1	1	1	n/a
OD08	0.730263	0.951462	0.840862	0.156411
OD12	1.00704	1.04014	1.02359	0.0234052
OD18	1.54737	1.09014	1.31875	0.32331
OD24	0.831683	1.3242	1.07794	0.348265
OD3	1.5	1.16113	1.33057	0.239616
OD4	2.24576	1.08709	1.66643	0.819306
OD4+2H	1.42562	1.19873	1.31217	0.160435
OD4+16H	0.719543	0.929101	0.824322	0.14818
		Quantification of Hfq-HTF								Normalisation to GroEL	Fold-change rel to OD04
	sample	Image Name	Channel	Name	Signal	Total	Area	Bkgnd.	Type						Image 0000001_02: LI-COR quantification of Hfq
	OD4+16H_2	0000001_02	800	1	252000	386000	1085	124	Signal	0.0770642	0.929101										Image 0000004_03: LI-COR quantification of GroEL
	OD4+2H_2	0000001_02	800	3	348000	492000	1085	132	Signal	0.0994286	1.19873
	OD4_2	0000001_02	800	4	321000	462000	1085	130	Signal	0.0901685	1.08709
	OD3_2	0000001_02	800	5	261000	400000	1085	128	Signal	0.09631	1.16113
Biological replicate 2	OD24_2	0000001_02	800	6	201000	338000	1085	126	Signal	0.109836	1.3242
	OD18_2	0000001_02	800	8	236000	376000	1085	129	Signal	0.0904215	1.09014
	OD12_2	0000001_02	800	9	220000	367000	1085	136	Signal	0.0862745	1.04014
	OD08_2	0000001_02	800	10	146000	289000	1085	132	Signal	0.0789189	0.951462
	OD04_2	0000001_02	800	11	78300	208000	1085	120	Signal	0.0829449	1
	OD4+16H_1	0000001_02	800	15	189000	328000	1178	118	Signal	0.0479695	0.719543
	OD4+2H_1	0000001_02	800	16	230000	363000	1085	122	Signal	0.0950413	1.42562
	OD4_1	0000001_02	800	18	265000	398000	1085	123	Signal	0.149718	2.24576
Biological replicate 1	OD3_1	0000001_02	800	20	219000	352000	1085	123	Signal	0.1	1.5
	OD24_1	0000001_02	800	21	168000	332000	1312	124	Signal	0.0554455	0.831683
	OD18_1	0000001_02	800	22	294000	429000	1085	125	Signal	0.103158	1.54737
	OD12_1	0000001_02	800	24	143000	274000	1085	121	Signal	0.0671362	1.00704
	OD08_1	0000001_02	800	25	148000	299000	1230	123	Signal	0.0486842	0.730263
	OD04_1	0000001_02	800	27	136000	270000	1102	122	Signal	0.0666667	1
		Quantification of GroEL
	sample	Image Name	Channel	Name	Signal	Total	Area	Bkgnd.	Type
	OD4+16H_2	0000004_03	800	12	3270000	3660000	684	569	Signal
	OD4+2H_2	0000004_03	800	13	3500000	4010000	684	755	Signal
	OD4_2	0000004_03	800	14	3560000	4430000	684	1280	Signal
	OD3_2	0000004_03	800	15	2710000	3350000	684	928	Signal
Biological replicate 2	OD24_2	0000004_03	800	16	1830000	2440000	684	898	Signal
	OD18_2	0000004_03	800	17	2610000	3200000	684	864	Signal
	OD12_2	0000004_03	800	18	2550000	3050000	684	743	Signal
	OD08_2	0000004_03	800	19	1850000	2260000	684	598	Signal
	OD04_2	0000004_03	800	20	944000	1200000	684	380	Signal
	OD4+16H_1	0000004_03	800	2	3940000	4560000	741	838	Signal
	OD4+2H_1	0000004_03	800	4	2420000	3000000	684	860	Signal
	OD4_1	0000004_03	800	5	1770000	2360000	684	856	Signal
Biological replicate 1	OD3_1	0000004_03	800	6	2190000	2600000	684	596	Signal
	OD24_1	0000004_03	800	7	3030000	3450000	684	619	Signal
	OD18_1	0000004_03	800	8	2850000	3490000	684	930	Signal
	OD12_1	0000004_03	800	9	2130000	2510000	684	548	Signal
	OD08_1	0000004_03	800	10	3040000	3400000	684	537	Signal
	OD04_1	0000004_03	800	11	2040000	2340000	684	433	Signal
