# Supplementary material for: Hfq CLASH uncovers sRNA-target interaction networks linked to nutrient availability adaptation
Source: eLife. 2020 May 1;9:e54655. doi: 10.7554/eLife.54655 (PMC7213987; doi:10.7554/eLife.54655)
Supplement: Figure 1—source data 1. [file elife-54655-fig1-data1.xlsx]

## Sheet: Figure 1B
Source data for Figure 1B
Raw data for the growth curves:
Replicate 1		Replicate 2		Replicate 3
time [min]	OD600	time [min]	OD600	time [min]	OD600
0	0.05	0	0.05	0	0.05
35	0.06	30	0.06	30	0.06
60	0.1	60	0.11	60	0.1
90	0.22	90	0.22	90	0.18
105	0.34	100	0.27	110	0.33
110	0.39	110	0.33	117	0.36
120	0.57	115	0.35	120	0.4
140	0.88	120	0.41	130	0.58
150	1.16	135	0.58	140	0.66
165	1.44	145	0.78	150	0.74
180	1.8	155	1	155	0.82
210	2.25	170	1.2	165	1.2
220	2.4	190	1.6	185	1.56
240	2.6	205	1.85	200	1.8
270	2.95	230	2.35	225	2.1
300	3.2	240	2.6	240	2.35
330	3.6	265	2.8	270	2.7
370	3.7	280	3	290	2.8
390	3.8	300	3.15	305	3.2
410	3.9	330	3.45	330	3.4
435	4.15	360	3.75	360	3.5
495	4.4	380	3.9	420	3.7
1350	4.6	390	3.95	450	3.9
		420	4.2	510	4
		450	4.4	570	4.1
		480	4.5	1350	4.1
		510	4.7
		1350	4.6
For plotting, the data for each curve were interpolated to accomodate the timepoints within all datasets.
The average and the standard deviation (SD) were calculated for each timepoint:
time [min]	OD600	OD600_2	OD600_3	mean	SD
0	0.05	0.05	0.05	0.05	8.49837e-18
30	0.055	0.06	0.06	0.0583333	0.00288675
35	0.06	0.085	0.08	0.075	0.0132288
60	0.1	0.11	0.1	0.103333	0.0057735
90	0.22	0.22	0.18	0.206667	0.023094
100	0.28	0.27	0.23	0.26	0.0264575
105	0.34	0.3	0.28	0.306667	0.0305505
110	0.39	0.33	0.33	0.35	0.034641
115	0.45	0.35	0.345	0.381667	0.0592312
117	0.51	0.38	0.36	0.416667	0.0814453
120	0.57	0.41	0.4	0.46	0.0953939
130	0.673333	0.495	0.58	0.582778	0.0891991
135	0.776667	0.58	0.62	0.658889	0.103941
140	0.88	0.68	0.66	0.74	0.121655
145	1.02	0.78	0.7	0.833333	0.166533
150	1.16	0.89	0.74	0.93	0.212838
155	1.3	1	0.82	1.04	0.242487
165	1.44	1.1	1.2	1.24667	0.174738
170	1.62	1.2	1.32	1.38	0.216333
180	1.8	1.33333	1.44	1.52444	0.244525
185	1.89	1.46667	1.56	1.63889	0.222419
190	1.98	1.6	1.68	1.75333	0.200333
200	2.07	1.725	1.8	1.865	0.181452
205	2.16	1.85	1.875	1.96167	0.172216
210	2.25	1.975	1.95	2.05833	0.166458
220	2.4	2.1	2.025	2.175	0.198431
225	2.46667	2.225	2.1	2.26389	0.186401
230	2.53333	2.35	2.225	2.36944	0.155084
240	2.6	2.6	2.35	2.51667	0.144338
265	2.775	2.8	2.525	2.7	0.152069
270	2.95	2.9	2.7	2.85	0.132288
280	3.03333	3	2.75	2.92778	0.15486
290	3.11667	3.075	2.8	2.99722	0.172065
300	3.2	3.15	3	3.11667	0.104083
305	3.4	3.3	3.2	3.3	0.1
330	3.6	3.45	3.4	3.48333	0.104083
360	3.65	3.75	3.5	3.63333	0.125831
370	3.7	3.825	3.54	3.68833	0.142858
380	3.75	3.9	3.58	3.74333	0.160104
390	3.8	3.95	3.62	3.79	0.165227
410	3.9	4.075	3.66	3.87833	0.208347
420	4.025	4.2	3.7	3.975	0.253722
435	4.15	4.3	3.8	4.08333	0.25658
450	4.23333	4.4	3.9	4.17778	0.254588
480	4.31667	4.5	3.93333	4.25	0.289156
495	4.4	4.6	3.96667	4.32222	0.323751
510	4.46667	4.7	4	4.38889	0.356423
570	4.53333	4.65	4.1	4.42778	0.289796
1350	4.6	4.6	4.1	4.43333	0.288675
