# Supplementary material for: Hfq CLASH uncovers sRNA-target interaction networks linked to nutrient availability adaptation
Source: eLife. 2020 May 1;9:e54655. doi: 10.7554/eLife.54655 (PMC7213987; doi:10.7554/eLife.54655)
Supplement: Figure 7—source data 1. [file elife-54655-fig7-data1.xlsx]

## Sheet: Figure 7B
Source data for Figure 7B
ArcZ vs CyaR
