# Supplementary material for: Hfq CLASH uncovers sRNA-target interaction networks linked to nutrient availability adaptation
Source: eLife. 2020 May 1;9:e54655. doi: 10.7554/eLife.54655 (PMC7213987; doi:10.7554/eLife.54655)
Supplement: Figure 7—source data 2. [file elife-54655-fig7-data2.xlsx]

## Sheet: Figure 7C
Source data for Figure 7C
Panel I: ArcZ vs CyaR		Biological replicate 1						Biological replicate 2					Biological replicate 3
Gene	Plasmids	Name	Mean Cp (technical triplicates)	STD (technical triplicates)	dCp (Gene-ReferenceGene)	ddCp (ArcZ overexpression-Control)	fold_change	Mean Cp (technical triplicates)_2	STD (technical triplicates)_2	dCp (Gene-ReferenceGene)_2	ddCp (ArcZ overexpression-Control)_2	fold_change_2	Mean Cp (technical triplicates)_3	STD (technical triplicates)_3	dCp (Gene-ReferenceGene)_3	ddCp (ArcZ overexpression-Control)_3	fold_change_3	fold_change_mean	fold_change_SEM	p-value (ttest.1samp)
arcZ	pJV300 + pZA CyaR	2 arcZ	19.5367	0.130128	14.46	0	1	20.6633	0.064291	15.17	0	1	19.7867	0.0929157	14.6233	0	1	1	n/a	n/a
arcZ	pZE ArcZ + pZA CyaR	4 arcZ	12.3733	0.222785	7.03	-7.43	172.446	12.9567	0.0152753	7.72667	-7.44333	174.047	12.6867	0.0251661	7.52333	-7.1	137.187	161.23	12.0287	n/a
cyaR	pJV300 + pZA CyaR	2 cyaR	13.5633	0.0896289	8.48667	0	1	14.12	0.193132	8.62667	0	1	14.05	0.181934	8.88667	0	1	1	n/a	n/a
cyaR	pZE ArcZ + pZA CyaR	4 cyaR	15.5833	0.0351188	10.24	1.75333	0.296616	15.7667	0.0378594	10.5367	1.91	0.266093	15.7967	0.168028	10.6333	1.74667	0.297989	0.29	0.0104109	0.000213069
rrfD	pJV300 + pZA CyaR	2 rrfD	5.07667	0.0873689	0	0	1	5.49333	0.0288675	0	0	1	5.16333	0.0929157	0	0	1	1	n/a	n/a
rrfD	pZE ArcZ + pZA CyaR	4 rrfD	5.34333	0.0550757	0	0	1	5.23	0.02	0	0	1	5.16333	0.0321455	0	0	1	1	n/a	n/a
nadE	pJV300 + pZA CyaR	2 nadE	18.34	0.0173205	13.2633	0	1	19.0367	0.250067	13.5433	0	1	18.7967	0.100664	13.6333	0	1	1	n/a	n/a
nadE	pZE ArcZ + pZA CyaR	4 nadE	16.6333	0.090185	11.29	-1.97333	3.92674	16.5	0.0282843	11.27	-2.27333	4.83439	16.8867	0.0907377	11.7233	-1.91	3.75809	4.17	0.334222	0.0109133
yqaE	pJV300 + pZA CyaR	2 yqaE	20.6067	0.0568624	15.5667	0	1	20.76	0.0608276	15.3833	0	1	20.52	0.03	15.4733	0	1	1	n/a	n/a
yqaE	pZE ArcZ + pZA CyaR	4 yqaE	17.6367	0.0602771	12.37	-3.19667	9.16838	17.3067	0.0208167	12.1667	-3.21667	9.29636	17.5067	0.236925	12.3333	-3.14	8.81524	9.09	0.143869	0.000315844
tpx	pJV300 + pZA CyaR	2 tpx	14.96	0.199249	9.92	0	1	15.13	0.14	9.75333	0	1	14.68	0.07	9.8	0	1	1	n/a	n/a
tpx	pZE ArcZ + pZA CyaR	4 tpx	16.6933	0.0251661	11.4267	1.50667	0.351923	16.56	0.0360555	11.42	1.66667	0.31498	16.27	0.0519615	11.2833	1.48333	0.357661	0.34	0.0133737	0.000412237
sdaC	pJV300 + pZA CyaR	2 sdaC	16.7633	0.0472582	11.7233	0	1	16.8367	0.0650641	11.46	0	1	16.6067	0.0208167	11.7267	0	1	1	n/a	n/a
sdaC	pZE ArcZ + pZA CyaR	4 sdaC	19.27	0.0173205	14.0033	2.28	0.205898	19.02	0.121655	13.88	2.42	0.186856	18.75	0.01	13.7633	2.03667	0.243726	0.21	0.0167129	0.00044971
p-values:
Sample	Gene & p-value calculation (scipy.stats )	p-value
pZE ArcZ + pZA CyaR	#nadE stats.ttest_1samp([3.926743, 4.834388,3.758091],1)	0.0109133
	#cyaR stats.ttest_1samp([0.296616, 0.266093, 0.297989],1)	0.000213069
	#yqaE stats.ttest_1samp([9.168379, 9.296365, 8.815241],1)	0.000315844
	#tpx stats.ttest_1samp([0.351923, 0.314980, 0.357661],1)	0.000412237
	#sdaC stats.ttest_1samp([0.205898, 0.186856, 0.243726],1)	0.00044971
Panel II: CyaR vs ArcZ		Biological replicate 1						Biological replicate 2					Biological replicate 3
Gene	Plasmids	Name	Mean Cp (technical triplicates)	STD (technical triplicates)	dCp (Gene-ReferenceGene)	ddCp (CyaR overexpression-Control)	fold_change	Mean Cp (technical triplicates)_2	STD (technical triplicates)_2	dCp (Gene-ReferenceGene)_2	ddCp (CyaR overexpression-Control)_2	fold_change_2	Mean Cp (technical triplicates)_3	STD (technical triplicates)_3	dCp (Gene-ReferenceGene)_3	ddCp (CyaR overexpression-Control)_3	fold_change_3	fold_change_mean	fold_change_SEM	p-value (ttest.1samp)
arcZ	pJV300 + pZA ArcZ	2 arcZ	14.0667	0.193477	9.27333	0	1	14.2233	0.255799	9.14333	0	1	14.4833	0.0288675	9.34	0	1	1	n/a	n/a
arcZ	pZE CyaR + pZA ArcZ	4 arcZ	14.57	0.0173205	9.44	0.166667	0.890899	14.32	0.06245	9.13333	-0.01	1.00696	14.43	0.1	9.33667	-0.00333333	1.00231	0.97	0.0379356	0.472889
cyaR	pJV300 + pZA ArcZ	2 cyaR	20.6033	0.0152753	15.81	0	1	20.33	0.0360555	15.25	0	1	21.0167	0.168622	15.8733	0	1	1	n/a	n/a
cyaR	pZE CyaR + pZA ArcZ	4 cyaR	14.9333	0.15695	9.80333	-6.00667	64.2964	14.9733	0.237978	9.78667	-5.46333	44.1192	16.4667	0.120554	11.3733	-4.5	22.6274	43.68	12.0308	n/a
nadE	pJV300 + pZA ArcZ	2 nadE	16.9633	0.196554	12.0433	0	1	16.6533	0.178979	11.55	0	1	16.84	0.0173205	11.7933	0	1	1	n/a	n/a
nadE	pZE CyaR + pZA ArcZ	4 nadE	17.5667	0.10504	12.37	0.326667	0.797377	17.3267	0.0945163	12.14	0.59	0.664343	17.5033	0.0602771	12.33	0.536667	0.689362	0.72	0.0408188	0.0201804
sdaC	pJV300 + pZA ArcZ	2 sdaC	18.4233	0.0568624	13.5033	0	1	18.5033	0.0404145	13.4	0	1	18.58	0.0360555	13.5333	0	1	1	n/a	n/a
sdaC	pZE CyaR + pZA ArcZ	4 sdaC	18.6233	0.0550757	13.4267	-0.0766667	1.05458	18.6333	0.0550757	13.4467	0.0466667	0.968171	18.7033	0.064291	13.53	-0.00333333	1.00231	1.01	0.025126	0.77113
tpx	pJV300 + pZA ArcZ	2 tpx	16.26	0.0458258	11.34	0	1	16.0467	0.141539	10.9433	0	1	16.1467	0.226789	11.1	0	1	1	n/a	n/a
tpx	pZE CyaR + pZA ArcZ	4 tpx	16.44	0.07	11.2433	-0.0966667	1.0693	16.2467	0.0378594	11.06	0.116667	0.922316	16	0.12	10.8267	-0.273333	1.2086	1.07	0.0826521	0.504171
p-values:
Sample	Gene & p-value calculation (scipy.stats )	p-value
pZE CyaR + pZA ArcZ	#arcZ stats.ttest_1samp([0.890899, 1.006956,1.002313],1)	0.472889
	#nadE stats.ttest_1samp([0.797377, 0.664343,0.689362],1)	0.0201804
	#sdaC stats.ttest_1samp([1.054579, 0.968171,1.002313],1)	0.77113
	#tpx stats.ttest_1samp([1.069300, 0.922316,1.208597],1)	0.504171
Panel III	ArcZ vs CyaR
		Biological replicate 1						Biological replicate 2					Biological replicate 3
Gene	Plasmids	Name	Mean Cp (technical triplicates)	STD (technical triplicates)	dCp (Gene-ReferenceGene)	ddCp (ArcZ/ArcZ 70-71 overexpression-Control)	fold_change	Mean Cp (technical triplicates)_2	STD (technical triplicates)_2	dCp (Gene-ReferenceGene)_2	ddCp (ArcZ /ArcZ 70-71 overexpression-Control)_2	fold_change_2	Mean Cp (technical triplicates)_3	STD (technical triplicates)_3	dCp (Gene-ReferenceGene)_3	ddCp (ArcZ/ArcZ 70-71 overexpression-Control)_3	fold_change_3	fold_change_mean	fold_change_SEM	p-value (ttest.1samp)
cyaR	pJV300 + pZA CyaR 38-39	7 cyaR	11.4733	0.0208167	6.57	0	1	11.7433	0.10504	6.78667	0	1	11.5767	0.0585947	6.78333	0	1	1	n/a	n/a
cyaR	pZE ArcZ + pZA CyaR 38-39	8 cyaR	12.77	0.115326	7.85333	1.28333	0.410845	12.6167	0.0907377	7.76333	0.976667	0.508152	12.8167	0.196299	7.94333	1.16	0.447513	0.46	0.0283729	0.00270427
cyaR	pZE ArcZ 70-71 + pZA CyaR 38-39	9 cyaR	12.0833	0.161658	7.21	0.64	0.641713	12.7633	0.0585947	7.90333	1.11667	0.461158	12.5567	0.102144	7.67333	0.89	0.539614	0.55	0.0522704	0.0130821
arcZ	pJV300 + pZA CyaR 38-39	7 arcZ	19.0567	0.208167	14.1533	0	1	19.7467	0.132035	14.79	0	1	19.355	0.0919239	14.5617	0	1	1	n/a	n/a
arcZ	pZE ArcZ + pZA CyaR 38-39	8 arcZ	11.4867	0.0472582	6.57	-7.58333	191.783	11.6867	0.0907377	6.83333	-7.95667	248.425	11.64	0.0458258	6.76667	-7.795	222.09	220.77	16.3644
arcZ	pZE ArcZ 70-71 + pZA CyaR 38-39	9 arcZ	9.94333	0.251462	5.07	-9.08333	542.445	11.1833	0.185831	6.32333	-8.46667	353.77	10.8167	0.0321455	5.93333	-8.62833	395.719	430.64	57.1969
rrfD	pJV300 + pZA CyaR 38-39	7 rrfD	4.90333	0.0251661	0	0	1	4.95667	0.118462	0	0	1	4.79333	0.164418	0	0	1	1	n/a	n/a
rrfD	pZE ArcZ + pZA CyaR 38-39	8 rrfD	4.91667	0.118462	0	0	1	4.85333	0.0907377	0	0	1	4.87333	0.113725	0	0	1	1	n/a	n/a
rrfD	pZE ArcZ 70-71 + pZA CyaR 38-39	9 rrfD	4.87333	0.0832666	0	0	1	4.86	0.01	0	0	1	4.88333	0.0665833	0	0	1	1	n/a	n/a
cyaR	pJV300 + pZA CyaR	4 cyaR	12.5733	0.145717	7.69667	0	1	13.33	0.0565685	8.58	0	1	13.4133	0.0945163	8.57833	0	1	1	n/a	n/a
cyaR	pZE ArcZ + pZA CyaR	5 cyaR	13.8733	0.0351188	8.91333	1.21667	0.430276	14.4567	0.0650641	9.61333	1.03333	0.48858	14.4133	0.0378594	9.47	0.891667	0.538991	0.49	0.031411	0.00371299
cyaR	pZE ArcZ 70-71 + pZA CyaR	6 cyaR	12.9367	0.0208167	8.13	0.433333	0.740549	13.12	0.216564	8.21667	-0.363333	1.28639	13.54	0.0424264	8.61667	0.0383333	0.973779	1	0.158127	0.998922
arcZ	pJV300 + pZA CyaR	4 arcZ	18.6467	0.105987	13.77	0	1	19.49	0.127279	14.74	0	1	18.59	0.254558	13.755	0	1	1	n/a	n/a
arcZ	pZE ArcZ + pZA CyaR	5 arcZ	11.23	0.226053	6.27	-7.5	181.019	11.63	0.06245	6.78667	-7.95333	247.852	11.3633	0.061101	6.42	-7.335	161.456	196.78	26.1549
arcZ	pZE ArcZ 70-71 + pZA CyaR	6 arcZ	9.50333	0.0404145	4.69667	-9.07333	538.698	9.65	0.199249	4.74667	-9.99333	1019.28	11.53	0.164621	6.60667	-7.14833	141.861	566.61	253.673
rrfD	pJV300 + pZA CyaR	4 rrfD	4.87667	0.0152753	0	0	1	4.75	0.0781025	0	0	1	4.835	0.233345	0	0	1	1	n/a	n/a
rrfD	pZE ArcZ + pZA CyaR	5 rrfD	4.96	0.01	0	0	1	4.84333	0.0321455	0	0	1	4.94333	0.0450925	0	0	1	1	n/a	n/a
rrfD	pZE ArcZ 70-71 + pZA CyaR	6 rrfD	4.80667	0.0814453	0	0	1	4.90333	0.142244	0	0	1	4.92333	0.0305505	0	0	1	1	n/a	n/a
p-values:
Sample	Gene	p-value calculation (scipy.stats )	p-value
pZE ArcZ + pZA CyaR	cyaR	# wt ArcZ + wt CyaR stats.ttest_1samp([0.430276, 0.488580, 0.538991 ],1)	0.00371299
pZE ArcZ 70-71 + pZA CyaR		#ArcZ 70-71+ wt CyaR stats.ttest_1samp([0.740549, 1.286395, 0.973779 ],1)	0.998922
pZE ArcZ + pZA CyaR SM		#wt ArcZ + CyaR 38-39 stats.ttest_1samp([0.410845, 0.508152, 0.447513 ],1)	0.00270427
pZE ArcZ 70-71 + pZA CyaR 38-39		#ArcZ 70-71+ CyaR 38-39 stats.ttest_1samp([0.641713, 0.461158, 0.539614 ],1)	0.0130821
