# Supplementary material for: Hfq CLASH uncovers sRNA-target interaction networks linked to nutrient availability adaptation
Source: eLife. 2020 May 1;9:e54655. doi: 10.7554/eLife.54655 (PMC7213987; doi:10.7554/eLife.54655)
Supplement: Figure 7—source data 3. [file elife-54655-fig7-data3.xlsx]

## Sheet: Figure 7D
Source data for Figure 7D
				Biological replicate 1					Biological replicate 2					Biological replicate 3
ArcZ overexpression vs. plasmid expressed CyaR	Gene	Plasmids	Name	Mean Cp (technical triplicates)	STD Cp (technical triplicates)	dCp (Gene-ReferenceGene)	fold_change_relative_to_5S	%5S	Mean Cp (technical triplicates)_2	STD Cp (technical triplicates)_2	dCp (Gene-ReferenceGene)_2	fold_change_relative to_5S_2	%5S_2	Mean Cp (technical triplicates)_3	STD Cp (technical triplicates)_3	dCp (Gene-ReferenceGene)_3	fold_change_3	%5S_3	%5S_mean	5%_SEM
	arcZ	pZE ArcZ + pZA CyaR	4 arcZ	12.63	0.222785	7.03	0.00765172	0.765172	12.96	0.0152753	7.72667	0.00472108	0.472108	12.71	0.0251661	7.52333	0.00543564	0.543564	0.593615	0.088224
	arcZ	pJV300 + pZA CyaR	2 arcZ	19.67	0.130128	14.46	4.43717e-05	0.00443717	20.71	0.064291	15.17	2.71253e-05	0.00271253	19.83	0.0929157	14.6233	3.96221e-05	0.00396221	0.00370397	0.000514332
	cyaR	pZE ArcZ + pZA CyaR	4 cyaR	15.58	0.0351188	10.24	0.0008269	0.08269	15.81	0.0378594	10.5367	0.000673205	0.0673205	15.98	0.168028	10.6333	0.000629575	0.0629575	0.0709893	0.00598436
	cyaR	pJV300 + pZA CyaR	2 cyaR	13.62	0.0896289	8.48667	0.00278778	0.278778	14.29	0.193132	8.62667	0.00252997	0.252997	14.26	0.181934	8.88667	0.00211274	0.211274	0.247683	0.0196669
	rrfD	pZE ArcZ + pZA CyaR	4 rrfD	5.28	0.0550757	0	1	100	5.25	0.02	0	1	100	5.2	0.0321455	0	1	100	100	0
	rrfD	pJV300 + pZA CyaR	2 rrfD	4.98	0.0873689	0	1	100	5.51	0.0288675	0	1	100	5.24	0.0929157	0	1	100	100	0
				Biological replicate 1					Biological replicate 2
CyaR overexpression vs. plasmid expressed ArcZ	Gene	Plasmids	Name	Mean Cp (technical triplicates)	STD Cp (technical triplicates)	dCp (Gene-ReferenceGene)	fold_change_relative_to_5S	%5S	Mean Cp (technical triplicates)_2	STD Cp (technical triplicates)_2	dCp (Gene-ReferenceGene)_2	fold_change_relative to_5S_2	%5S_2	%5S_mean	5%_SEM
	cyaR	pZE CyaR + pZA ArcZ	4 cyaR	14.88	0.15695	9.80333	0.00111919	0.111919	14.76	0.237978	9.78667	0.00113219	0.113219	0.112569	0.000650216
	cyaR	pJV300 + pZA ArcZ	2 cyaR	20.59	0.0152753	15.81	1.74067e-05	0.00174067	20.34	0.0360555	15.25	2.56621e-05	0.00256621	0.00215344	0.000412772
	arcZ	pZE CyaR + pZA ArcZ	4 arcZ	14.58	0.0173205	9.44	0.00143972	0.143972	14.39	0.06245	9.13333	0.00178071	0.178071	0.161021	0.0170496
	arcZ	pJV300 + pZA ArcZ	2 arcZ	14.29	0.193477	9.27333	0.00161603	0.161603	14.4	0.255799	9.14333	0.00176841	0.176841	0.169222	0.00761906
	rrfD	pZE CyaR + pZA ArcZ	4 rrfD	5.09	0.034641	0	1	100	5.13	0.051316	0	1	100	100	0
	rrfD	pJV300 + pZA ArcZ	2 rrfD	4.78	0.011547	0	1	100	5.07	0.0556776	0	1	100	100	0
				Biological replicate 1						Biological replicate 2					Biological replicate 3
CyaR overexpression vs. endogenous ArcZ	Gene	Plasmids	Name	Mean Cp (technical triplicates)	STD Cp (technical triplicates)	dCp (Gene-ReferenceGene)	ddCp (CyaR overexpression-Control)	fold_change	Mean Cp (technical triplicates)_2	STD Cp (technical triplicates)_2	dCp (Gene-ReferenceGene)_2	ddCp (CyaR overexpression-Control)_2	fold_change_2	Mean Cp (technical triplicates)_3	STD Cp (technical triplicates)_3	dCp (Gene-ReferenceGene)_3	ddCp (CyaR overexpression-Control)_3	fold_change_3	fold_change_mean	fold_change_SEM
	arcZ	pJV300 + pZA CyaR	2 arcZ	19.5367	0.130128	14.46	0	1	20.6633	0.064291	15.17	0	1	19.7867	0.0929157	14.6233	0	1	1	0
	arcZ	pZE ArcZ + pZA CyaR	4 arcZ	12.3733	0.222785	7.03	-7.43	172.446	12.9567	0.0152753	7.72667	-7.44333	174.047	12.6867	0.0251661	7.52333	-7.1	137.187	161.23	12.0287
	cyaR	pJV300 + pZA CyaR	2 cyaR	13.5633	0.0896289	8.48667	0	1	14.12	0.193132	8.62667	0	1	14.05	0.181934	8.88667	0	1	1	0
	cyaR	pZE ArcZ + pZA CyaR	4 cyaR	15.5833	0.0351188	10.24	1.75333	0.296616	15.7667	0.0378594	10.5367	1.91	0.266093	15.7967	0.168028	10.6333	1.74667	0.297989	0.29	0.0104109
	rrfD	pJV300 + pZA CyaR	2 rrfD	5.07667	0.0873689	0	0	1	5.49333	0.0288675	0	0	1	5.16333	0.0929157	0	0	1	1	0
	rrfD	pZE ArcZ + pZA CyaR	4 rrfD	5.34333	0.0550757	0	0	1	5.23	0.02	0	0	1	5.16333	0.0321455	0	0	1	1	0
	nadE	pJV300 + pZA CyaR	2 nadE	18.34	0.0173205	13.2633	0	1	19.0367	0.250067	13.5433	0	1	18.7967	0.100664	13.6333	0	1	1	0
	nadE	pZE ArcZ + pZA CyaR	4 nadE	16.6333	0.090185	11.29	-1.97333	3.92674	16.5	0.0282843	11.27	-2.27333	4.83439	16.8867	0.0907377	11.7233	-1.91	3.75809	4.17	0.334222
	yqaE	pJV300 + pZA CyaR	2 yqaE	20.6067	0.0568624	15.5667	0	1	20.76	0.0608276	15.3833	0	1	20.52	0.03	15.4733	0	1	1	0
	yqaE	pZE ArcZ + pZA CyaR	4 yqaE	17.6367	0.0602771	12.37	-3.19667	9.16838	17.3067	0.0208167	12.1667	-3.21667	9.29636	17.5067	0.236925	12.3333	-3.14	8.81524	9.09	0.143869
	tpx	pJV300 + pZA CyaR	2 tpx	14.96	0.199249	9.92	0	1	15.13	0.14	9.75333	0	1	14.68	0.07	9.8	0	1	1	0
	tpx	pZE ArcZ + pZA CyaR	4 tpx	16.6933	0.0251661	11.4267	1.50667	0.351923	16.56	0.0360555	11.42	1.66667	0.31498	16.27	0.0519615	11.2833	1.48333	0.357661	0.34	0.0133737
	sdaC	pJV300 + pZA CyaR	2 sdaC	16.7633	0.0472582	11.7233	0	1	16.8367	0.0650641	11.46	0	1	16.6067	0.0208167	11.7267	0	1	1	0
	sdaC	pZE ArcZ + pZA CyaR	4 sdaC	19.27	0.0173205	14.0033	2.28	0.205898	19.02	0.121655	13.88	2.42	0.186856	18.75	0.01	13.7633	2.03667	0.243726	0.21	0.0167129
