# Supplementary material for: Hfq CLASH uncovers sRNA-target interaction networks linked to nutrient availability adaptation
Source: eLife. 2020 May 1;9:e54655. doi: 10.7554/eLife.54655 (PMC7213987; doi:10.7554/eLife.54655)
Supplement: Supplementary file 1. — Chromosome indicates the E. coli chromosome, sequence start and sequence end are the positions in the chimeric read that correspond to the first and second fragment. Chromosome start and chromosome end are the positions in the E. coli K12 reference genome. [file elife-54655-supp1.xlsx]

## Sheet: merged_CLASH_datasets.hyb
Supplementary File 1
Chromosome indicates the E. coli chromosome, sequence start and sequence end are the positions in the chimeric read that correspond to the first and second fragment.
Chromosome start and chromosome end are the positions in the E. coli K12 reference genome.
		First fragment in chimera						Second fragment in chimera
ID	Sequence	Chromosome	sequence start	sequence end	chromosome start	chromosome end	blast score	Chromosome	sequence start	sequence end	chromosome start	chromosome end	blast score
1960_538	TGATATTCCTGTTTTTCAGCAACAGTGTGATATTCCTGTTTTTCAGG	Chromosome	9	26	3399713	3399730	0.0053	Chromosome	29	47	3665543	3665525	0.0015
4522_436	CTTGCTGTGTGTAGTCTTTGCCCATCTCCCTGTCTGTCGCTTTAGACTATACACAGCATAC	Chromosome	2	30	1770432	1770460	6.3e-09	Chromosome	31	60	1216685	1216714	1.8e-09
5323_399	TGCTGTGTGTAGTCTTTGCCCATCTCCCACTTTGTCTGTCGCTTTAGACTATACACAGCATAC	Chromosome	1	30	1770433	1770462	1.8e-09	Chromosome	31	62	1216683	1216714	1.4e-10
5599_385	GGTTAATGAGGCGAACCGGGGGAACTGAAACCTTTATTCCCCTGGTATGTG	Chromosome	1	31	4037686	4037716	3.7e-10	Chromosome	32	51	3658992	3659011	0.00048
5702_380	CGGGGGGCAACAAGGGGATTGATATCGCTTTTCCTTGCCATAGACACCATCCCTGTCTTCCCCCAC	Chromosome	2	28	2867926	2867900	9.2e-08	Chromosome	29	66	4106330	4106367	7e-14
6294_348	CTGTCACGCAGGGGGTCGCGGGTTCGAGTCCCGTCCGTTCCAGTGCTGTCACGCAGGGGGTCGCGGGTTCGAGTCCCGTCCGTTCCGCCAC	Chromosome	1	41	236963	237003	2.4e-15	Chromosome	46	91	3946904	3946949	3.9e-18
6736_326	CATCGCTAGCACCAGGTATAACCAATTTCCCTGGTGTTGGCGTGCATCGCTAGCACCAGGTATAACCAATTTCCCTGGTGTTGGCGCAGTG	Chromosome	46	69	4424523	4424500	6.7e-06	Chromosome	69	90	3350641	3350662	8.6e-05
7374_303	GGTCACGCAGGGGGTCGCGGGTTCGAGTCCCGTCCGTTCCGGGGTCACGCAGGGGGTCGCGGGTTCGAGTCCCGTCCGTTCCGCCACCCTA	Chromosome	2	41	228962	229001	8.5e-15	Chromosome	44	91	3946906	3946953	3e-19
7604_296	GAGACACCATCCCTGTCTTCCCCCACATGATTAAGGGGTGTTGTAAGGGGATGGCTGGCCTGATAG	Chromosome	2	29	4106343	4106370	2.6e-08	Chromosome	30	65	461349	461384	9.1e-13
8870_266	GTTGCTGTGTGTAGTCTTTGCCCATCTCCCATGGCAGAACCGCCGGGGCATGATGGGCGAGGCT	Chromosome	2	31	1770432	1770461	1.9e-09	Chromosome	31	63	670772	670740	4.1e-11
9009_263	GACTGCCGAAGCCATGACGGGGGCGCTGGCCTTCTCGCCAGCGTCGCCCCG	Chromosome	2	30	3818907	3818935	4.7e-09	Chromosome	30	50	2947763	2947783	0.00013
9455_255	CGAAGGTGGCGGAATTGGTCCACAATGCGAAGGTGGCGGAATTGGTG	Chromosome	1	19	4606400	4606382	0.0015	Chromosome	22	46	3982601	3982625	6.8e-07
9754_250	CCTGTTAATCCGTATGTCACTGGTTCGAGTCCAGTCAGAGGGTGCCTGTTAATCCGTATGTCACTGGTTCGAGTCCAGTCAGAGGAGCCAG	Chromosome	2	41	2058071	2058032	8.5e-15	Chromosome	46	90	2062291	2062335	1.4e-17
9832_249	GGTAGAACGGCGGACTGTTAATCCCCACAGTGGGTAGAACGGCGGACTGTTAATCCG	Chromosome	1	24	2059868	2059891	3.4e-06	Chromosome	28	57	2058090	2058061	7.3e-08
10208_242	CCACAGAGTAGGTGGGGTAACGGCTCACCTAGGTGGGGTAACGGCTCACCTAGG	Chromosome	7	33	4035780	4035806	6.7e-08	Chromosome	30	54	224022	224046	8.7e-07
11631_214	TAGGCAAACCAACGGATAAACCAAACCTGGTGTGCGGTCCGACAGTGTAGGCAAACCAACGGATAAACCAAACCTGGTGTGCGGTCCGGTG	Chromosome	2	41	3667137	3667098	8.5e-15	Chromosome	46	90	1571605	1571561	6.6e-16
11808_209	CGCATCCGTAGCTCAGCTGGATAGAGTACTCGGCTGCGAACGCGCATCCGTAGCTCAGCTGGATAGAGTACTCGGCTGCGAACCGAGCGGG	Chromosome	2	41	2817860	2817821	4e-13	Chromosome	44	90	2818549	2818503	5.1e-17
12115_202	CATTGCTGTGTGTAGTCTTTGCCCATCTCCATTTTTGTCTGTCGCTTTAGACTATACACAGCATAC	Chromosome	2	30	1770431	1770459	7.1e-09	Chromosome	31	65	1216680	1216714	3.3e-12
12214_200	TAACTGGAGGAAGGTGGGGATGACGTCAAGTCATCATTTTCCTTGCCAGACACCATCCCTGTCTTCCCCC	Chromosome	2	37	4036700	4036735	9.9e-13	Chromosome	37	70	4106330	4106365	1e-07
12484_193	ATTGCTGTGTGTAGTCTTTGCCCATCTCCAGGGCTGATTTATTACTACACACAGCAGAG	Chromosome	1	29	1770431	1770459	6e-09	Chromosome	30	57	1103308	1103281	2.2e-08
12639_189	GTAGAACGGCGGACTGTTAATCCGTATGTCACAGTGGTAGAACGGCGGACTGTTAATCCGTATGTCACTC	Chromosome	1	32	2058084	2058053	1.7e-10	Chromosome	36	69	2044566	2044599	1.3e-11
12801_184	CACCCTGTCTGTCCATAGTGATTAATGTAGCACCGCCTCGTCGTTGGTGGTAGCTGCGGCGACAGGACCAGTGGGGGCGACGGTGGGGCAG	Chromosome	2	38	2942846	2942882	4e-13	Chromosome	42	90	1519481	1519529	8.4e-20
13676_150	ATTTTTTCACTTCCTGTACATTTACCCTGTCTGTCCAACACAGACAGGTACAGGAAGAAAAAAACATGGG	Chromosome	2	37	2942824	2942859	9.9e-13	Chromosome	36	69	4429834	4429867	1.3e-11
14399_113	GTTGCTGCCACTGGGGGATGACGTCATCTCTGTCTTCCCCCGTGGTTGCTGCCACTGGGGGATGACGTCATCTCTGTCTTCCCCCACATGC	Chromosome	46	71	984184	984209	2.4e-05	Chromosome	69	91	4106349	4106371	0.0011
14571_100	GATGGCGCTTTATCCTGACGTACAGTGGATGGCGCTTTATCCTGACA	Chromosome	2	20	739418	739436	0.0015	Chromosome	24	41	3118408	3118425	0.0053
15270_54	TATGGGAGTGGGTTGCAAAAGAAGTTTCCGCAAAGAAAAATAACTCCCACTCCCTGCACACGG	Chromosome	2	25	3943220	3943243	4e-06	Chromosome	26	62	4085910	4085874	2.4e-13
15305_52	CATGCTCGCCTGTGCCGCGTTTTCGAGCACAGGCGCAGGCGAAACAGTGCATGCTCGCCTGTGCCGCGTTTTCGAGCACAGGCGCAGGCGA	Chromosome	1	19	1943452	1943470	0.004	Chromosome	17	41	491308	491332	1.9e-06
15476_46	CATCGAGTCTCCTTGTTTCGACTTAAGCTGGCAATTGGATTGCCAGCTTTCTTTTAATGTCGAAACAAGGAGCAG	Chromosome	2	57	3658038	3657983	8.3e-24	Chromosome	56	74	4085845	4085827	0.0031
16456_27	CACCCTGTCTGTCCATAGTGATTAATGTAGCACCGCCTCGCGTTGGTGGTAGCTGCGGCGACAGGACCAGTGGGGGCGACGGTGGGGCAG	Chromosome	2	38	2942846	2942882	3.9e-13	Chromosome	41	89	1519481	1519529	8.3e-20
17866_17	CGGGTGATCAGCTCAGCTGGGAGAGCACCACCAACAGTGCGGGTGATCAGCTCAGCTGGGAGAGCACCACG	Chromosome	1	32	780764	780795	3.7e-07	Chromosome	34	68	2520924	2520958	3.7e-07
18185_16	GTTGCTGTGTGTAGTCTTTGCCCATCTCCCATGGCAGAACCGCCGGGGCATGATGGGCGAGGCG	Chromosome	2	31	1770432	1770461	1.9e-09	Chromosome	31	64	670772	670739	1.1e-11
18174_16	GTAGAACGGCGGACTGTTAATCCGTATGTCACTGTGGTAGAACGGCGGACTGTTAATCCGTATGTCACTC	Chromosome	1	34	2059869	2059902	1.3e-11	Chromosome	36	69	2062277	2062310	1.3e-11
18275_15	ACACAGTGCATTAAGCAGTAAGCCGGTCATAAAGCAGTAAGCCGGTCATAA	Chromosome	10	33	3946823	3946846	2.8e-06	Chromosome	32	51	228882	228901	0.00048
18708_14	CTGTCACGCAGGGGGTCGCGGGTTCGAGTCCCGTCCGTTCCGTGCTGTCACGCAGGGGGTCGCGGGTTCGAGTCCCGTCCGTTCCGCCAC	Chromosome	1	42	228960	229001	6.5e-16	Chromosome	45	90	236963	237008	3.9e-18
18815_14	GGTAGAACGGCGGACTGTTAATCCGTATGTCACTCAACAGTGGGTAGAACGGCGGACTGTTAATCCGTATGTCACTGGTTCGC	Chromosome	1	34	2058085	2058052	1.6e-11	Chromosome	38	82	2062272	2062316	5.8e-16
19371_12	ATAATCCGTATGTCACTGGTTCGAGTCCAGTCAGAGGAGCCACAGTGATAATCCGTATGTCACTGGTTCGAGTCCAGTCAGAGGAGCCAT	Chromosome	2	42	2044584	2044624	2.3e-15	Chromosome	46	89	2058070	2058027	2.3e-15
19463_12	CCTGTTAATCCGTATGTCACTGGTTCGAGTCCAGTCAGAGGTGCCTGTTAATCCGTATGTCACTGGTTCGAGTCCAGTCAGAGGAGCCAG	Chromosome	2	45	2058071	2058028	2.3e-15	Chromosome	45	89	2059882	2059926	1.4e-17
20795_10	GGTCACGCAGGGGGTCGCGGGTTCGAGTCCCGTCCGTTCCGGGGTCACGCAGGGGGTCGCGGGTTCGAGTCCCGTCCGTTCCGCCACCCTG	Chromosome	2	41	236965	237004	8.5e-15	Chromosome	44	90	3946906	3946952	1.1e-18
21517_9	GAGACACCATCCCTGTCTTCCCCCACATGATTAAGGGGTGTTGTAAGGGGATGGCTGGCCTGACAG	Chromosome	2	29	4106343	4106370	2.6e-08	Chromosome	30	63	461349	461382	1.2e-11
21695_9	GTTTTAATCAATTGGTCGCAGGTTCGAATCCTGCACGACCGGTTTTAATCAATTGGTCGCAGGTTCGAATCCTGCACGACCCACCAATCG	Chromosome	2	40	2521285	2521323	3e-14	Chromosome	43	90	780586	780633	3e-19
22381_8	GAAGCCTGCGAAGGTGTGCTGTGAGGCATGCTGGAGGTATCAGTGGAAGCCTGCGAAGGTGTGCTGTGAGGCATGCTGGAGGTATCAGAC	Chromosome	2	43	4211246	4211287	6.5e-16	Chromosome	44	89	3425583	3425538	1.8e-16
23241_7	CATCGCTAGCACCAGGTATAACCAATTTCCCTGGTGTTGGGTGCATCGCTAGCACCAGGTATAACCAATTTCCCTGGTGTTGGCGCAGTG	Chromosome	45	68	4424523	4424500	6.6e-06	Chromosome	68	89	3350641	3350662	8.5e-05
23861_7	GTCCCCCTGGTATGTGTATCCATTATCGGCGCACTGTTAAGACAGTGGTCCCCCTGGTATGTGTATCCATTATCGGCGCACTGTTAAGCC	Chromosome	51	69	3658999	3659017	0.004	Chromosome	70	89	2800441	2800460	0.0011
23946_7	GTTTTAATCAATTGGTCGCAGGTTCGAATCCTGCACGACGGTTTTAATCAATTGGTCGCAGGTTCGAATCCTGCACGACCCACCAATCG	Chromosome	2	39	781609	781646	1.1e-13	Chromosome	42	89	780586	780633	2.9e-19
25534_6	GTCCCCCTGGTATGTGTATCCATTATCGGCGCACTGTTAGACAGTGGTCCCCCTGGTATGTGTATCCATTATCGGCGCACTGTTAAGCC	Chromosome	50	68	3658999	3659017	0.0039	Chromosome	69	88	2800441	2800460	0.0011
25494_6	GGTCACGCAGGGGGTCGCGGGTTCGAGTCCCGTCCGTTCGGGTCACGCAGGGGGTCGCGGGTTCGAGTCCCGTCCGTTCCGCCACCCTA	Chromosome	2	39	228962	228999	1.1e-13	Chromosome	42	89	3946906	3946953	2.9e-19
25644_6	GTTTTAATCAATTGGTCGCAGGTTCGAATCCTGCACGACCCGGTTTTAATCAATTGGTCGCAGGTTCGAATCCTGCACGACCCACCAACCG	Chromosome	2	41	780875	780914	8.5e-15	Chromosome	44	88	781609	781653	1.4e-17
26641_5	CACCCTGTCTGTCCATAGTGATTAATGTAGCACCGCCTCCGTTGGTGGTAGCTGCGGCGACAGGACCAGTGGGGGCGACGGTGGGGCAG	Chromosome	2	38	2942846	2942882	3.8e-13	Chromosome	40	88	1519481	1519529	8.2e-20
26735_5	CATCGCTAGCACCAGGTATAACCAATTTCCCTGGTGTTGGCGCAGTG	Chromosome	2	25	4424523	4424500	2.5e-06	Chromosome	25	46	3350641	3350662	3.2e-05
26731_5	CATCGAGTCTCCTTGTTTCGACTTAAGCTGGTAATTGGATTGCCAGCTTTCTTTTAATGTCGAAACAAGGAGCAG	Chromosome	2	57	3658038	3657983	3.9e-22	Chromosome	56	74	4085845	4085827	0.0031
26783_5	CATTCTGGGGCTTGGTGAAATATGATGCTTGCTCGTACCAGGCCCCT	Chromosome	1	18	1555199	1555182	0.0053	Chromosome	19	47	1958494	1958466	4.1e-09
27214_5	CTGTCACGCAGGGGGTCGCGGGTTCGAGTCCCGTCCGTTCCTGCTGTCACGCAGGGGGTCGCGGGTTCGAGTCCCGTCCGTTCCGCCAC	Chromosome	1	41	3946904	3946944	2.3e-15	Chromosome	44	89	228960	229005	3.8e-18
27857_5	GGTAGAACGGCGGACTGTTAATCCCCACAGTGGGTAGAACGGCGGACTGTTAAACCG	Chromosome	1	24	2059868	2059891	3.4e-06	Chromosome	28	57	2058090	2058061	3.4e-06
29605_4	CACCCTGTCTGTCCATAGTGATTAATGTAGCACCGCCTCGTGTTGGTGGTAGCTGCGGCGACAGGACCAGTGGGGGCGACGGTGGGGCAG	Chromosome	2	38	2942846	2942882	3.9e-13	Chromosome	42	89	1519482	1519529	3e-19
31662_4	GGATAAGGGTGAGGTCGGTGGTTCAAGTCCACTCAGGCCTAGTGGGATAAGGGTGAGGTCGGTGGTTCAAGTCCACTCAGGCCTACCAG	Chromosome	2	41	3427118	3427079	8.3e-15	Chromosome	46	88	225415	225457	1.8e-16
31759_4	GGTTAATGAGGCGAACCGGGGGAACTGAAACCTTTATTCCCCTGGTATGCG	Chromosome	1	31	4210210	4210240	3.7e-10	Chromosome	32	49	3658992	3659009	0.0062
32314_4	TAACTGGAGGAAGGTGGGGATGACGTCAAGTCGTCATTTTCCTTGCCAGACACCATCCCTGTCTTCCCCC	Chromosome	2	37	3942977	3943012	4.6e-11	Chromosome	37	70	4106330	4106365	1e-07
32444_4	TAGGCAAACCAACGGATAAACCAAACCTGGTGTGCGGTCCGCAGTGTAGGCAAACCAACGGATAAACCAAACCTGGTGTGCGGTCCGGTG	Chromosome	2	41	3667137	3667098	8.4e-15	Chromosome	45	89	1571605	1571561	6.5e-16
32948_4	TGCTGTGTGTAGTCTTTGCCCATCTCCCACTTTGTCTGTCGCTTTAGACTATACACAGCGTAC	Chromosome	1	30	1770433	1770462	1.8e-09	Chromosome	31	62	1216683	1216714	6.6e-09
33846_3	ATAATCCGTATGTCACTGGTTCGAGTCCAGTCAGAGGAGCCCAGTGATAATCCGTATGTCACTGGTTCGAGTCCAGTCAGAGGAGCCAT	Chromosome	2	41	2044584	2044623	8.3e-15	Chromosome	45	88	2058070	2058027	2.3e-15
34775_3	CACCCTGTCTGTCCATAGTGATTAATGTAGCACCGCCTCGTCGTTGGTGGTAGCTGCGGCGACAGGACCGGTGGGGGCGACGGTGGGGCAG	Chromosome	2	38	2942846	2942882	4e-13	Chromosome	42	90	1519481	1519529	3.9e-18
35985_3	CCTGTTAATCCGTATGTCACTGGTTCGAGTCCAGTCAGGTGCCTGTTAATCCGTATGTCACTGGTTCGAGTCCAGTCAGAGGAGCCAG	Chromosome	2	38	2044580	2044616	3.8e-13	Chromosome	43	87	2059882	2059926	1.4e-17
36470_3	CTAATACAGTGCACTGACGAGGCGCAGCGCTTTTGCGCCTTGTCGCTGCAGA	Chromosome	13	30	1302628	1302645	0.0064	Chromosome	31	49	3401171	3401153	0.0018
36851_3	CTGGTAGAGCACGACCTTGCCAAGGTCGGGGTCGCGAGTTCCAGTGCTGGTAGAGCACGACCTTGCCAAGGTCGGGGTCGCGAGTTCGAC	Chromosome	2	45	1992101	1992058	2.3e-15	Chromosome	48	89	4392488	4392529	6.5e-16
39221_3	GGTAGAACGGCGGACTGTTAATCCCCGCAGTGGGTAGAACGGCGGACTGTTAATCCG	Chromosome	1	24	2058085	2058062	3.4e-06	Chromosome	28	57	2059863	2059892	7.3e-08
39222_3	GGTAGAACGGCGGACTGTTAATCCGTATGTCACCAACAGTGGGTAGAACGGCGGACTGTTAATCCGTATGTCACTGGTTCGC	Chromosome	1	33	2058085	2058053	5.8e-11	Chromosome	37	81	2062272	2062316	5.7e-16
39619_3	GTTCAGTCGGTAGAACGGCGGACTGTTGATCCTACAGTGGTTCAGTCGGTAGAACGGCGGACTGTTGATCG	Chromosome	1	32	2062269	2062300	7.9e-09	Chromosome	37	70	2058096	2058063	2.8e-08
39618_3	GTTCAGTCGGTAGAACGGCGGACTGTTAGTCCTACAGTGGTTCAGTCGGTAGAACGGCGGACTGTTAGTCG	Chromosome	1	32	2059860	2059891	7.9e-09	Chromosome	37	67	2058096	2058066	2.8e-08
39706_3	GTTGCTGTGTGTAGTCTTTGCCCATCTCCCATGGCAGAGCCGCCGGGGCATGATGGGCGAGGCT	Chromosome	2	31	1770432	1770461	1.9e-09	Chromosome	31	63	670772	670740	1.9e-09
40746_3	TAGGCAAACCAACGGATAAACCAAACCTGGTGTGCGGTCCGACGGTGTAGGCAAACCAACGGATAAACCAAACCTGGTGTGCGGTCCGGTG	Chromosome	2	41	3667137	3667098	8.5e-15	Chromosome	46	90	1571605	1571561	6.6e-16
41817_3	TGCTGTGTGTAGTCTTTGCCCATCCCCCACTTTGTCTGTCGCTTTAGACTATACACAGCATAC	Chromosome	1	30	1770433	1770462	8.6e-08	Chromosome	31	62	1216683	1216714	1.4e-10
43933_2	ACGCAAGGTTAAAACTCAAGTGAATTGACGGGCACAGTGACGCAAGGTTAAAACTCAAGTGAATTGACGGG	Chromosome	21	41	2135894	2135914	0.01	Chromosome	41	71	4209043	4209073	2.8e-08
44630_2	ATAATCCGTATGTCACTGGTTCGAGTCCAGTCAGAGGAGCACAGTGATAATCCGTATGTCACTGGTTCGAGTCCAGTCAGAGGAGCCAT	Chromosome	2	40	2059886	2059924	3e-14	Chromosome	45	88	2058070	2058027	2.3e-15
45544_2	ATTGCTGTGTGCAGTCTTTGCCCATCTCCAGGGCTGATTTATTACTACACACAGCAGAG	Chromosome	1	29	1770431	1770459	2.8e-07	Chromosome	30	57	1103308	1103281	2.2e-08
45545_2	ATTGCTGTGTGTAGTCTTTGCCCATCTCCAGGGCTGATTTATTACTACACCCAGCAGAG	Chromosome	1	29	1770431	1770459	6e-09	Chromosome	30	57	1103308	1103281	1e-06
45814_2	ATTTTTCCACTTCCTGTACATTTACCCTGTCTGTCCAACACAGACAGGTACAGGAAGAAAAAAACATGGG	Chromosome	2	37	2942824	2942859	4.6e-11	Chromosome	36	69	4429834	4429867	1.3e-11
46441_2	CAACCGAGATTCCCCCAGTAGCGGCGAGCGAACGGGGAGGCAACCGAGATTCCCCCAGTAGCGGCGAGCGAACGGGGAGCAGCCCAGAG	Chromosome	1	40	225983	226022	8.3e-15	Chromosome	41	89	4210267	4210315	8.2e-20
47515_2	CACCCTGTCTGTCCATAGTGATTAATGTAGCACCGCCTCGTCGTTGGTGGTAGCTGCGGCGACAGGACCAGTGGGGGCGACGGCGGGGCAG	Chromosome	2	38	2942846	2942882	4e-13	Chromosome	42	90	1519481	1519529	3.9e-18
47509_2	CACCCTATCTGTCCATAGTGATTAATGTAGCACCGCCTCGTCGTTGGTGGTAGCTGCGGCGACAGGACCAGTGGGGGCGACGGTGGGGCAG	Chromosome	2	38	2942846	2942882	1.8e-11	Chromosome	42	90	1519481	1519529	8.4e-20
47512_2	CACCCTGTCTGTCCATAGTGATTAACGTAGCACCGCCTCGTCGTTGGTGGTAGCTGCGGCGACAGGACCAGTGGGGGCGACGGTGGGGCAG	Chromosome	2	38	2942846	2942882	1.8e-11	Chromosome	42	90	1519481	1519529	8.4e-20
47516_2	CACCCTGTCTGTCCATAGTGATTAATGTAGCACCGCCTCGTTCGTTGGTGGTAGCTGCGGCGACAGGACCAGTGGGGCGACGGTGGGGCAG	Chromosome	2	38	2942846	2942882	4e-13	Chromosome	43	90	1519481	1519529	6.6e-16
49087_2	CATCGCTAGCACCAGGTATAACCAATTTCCCTGGTGTTGTGCATCGCTAGCACCAGGTATAACCAATTTCCCTGGTGTTGGCGCAGTG	Chromosome	43	66	4424523	4424500	6.4e-06	Chromosome	66	87	3350641	3350662	8.3e-05
49086_2	CATCGCTAGCACCAGGTATAACCAATTTCCCTGGTGTTGGTGCATCGCTAGCACCAGGTATAACCAATTTCCCTGGTGTTGGCGCAGTG	Chromosome	44	67	4424523	4424500	6.5e-06	Chromosome	67	88	3350641	3350662	8.4e-05
49085_2	CATCGCTAGCACCAGGTATAACCAATTTCCCTGGTGTTGGCTGCATCGCTAGCACCAGGTATAACCAATTTCCCTGGTGTTGGCGCAGTG	Chromosome	45	68	4424523	4424500	6.6e-06	Chromosome	68	89	3350641	3350662	8.5e-05
49739_2	CATTCTGGGGCTTGGTGAAATATGATGCTTGCTCGTACCAGGCCCCG	Chromosome	1	18	1555199	1555182	0.0053	Chromosome	19	46	1958494	1958467	1.5e-08
49861_2	CATTGCTGTGTGTAGTCTTTGCCCATCTCCATTTTTGTCTGTCGCTTTAGACTATACACAGCACAC	Chromosome	2	30	1770431	1770459	7.1e-09	Chromosome	31	63	1216680	1216712	4.2e-11
49860_2	CATTGCTGTGTGTAGTCTTTGCCCATCTCCATTTTTGTCCGTCGCTTTAGACTATACACAGCATAC	Chromosome	2	30	1770431	1770459	7.1e-09	Chromosome	31	65	1216680	1216714	1.5e-10
51607_2	CCTGTTAACCCGTATGTCACTGGTTCGAGTCCAGTCAGAGGGTGCCTGTTAACCCGTATGTCACTGGTTCGAGTCCAGTCAGAGGAGCCAG	Chromosome	2	41	2062291	2062330	4e-13	Chromosome	46	90	2059882	2059926	6.6e-16
51608_2	CCTGTTAATCCGTATGTCACTGGTTCGAGTCCAGTCAGAGGGTGCCTGTTAATCCGTATGTCACTGGTTCGAGTCCAGTCAGAGGGGCCAG	Chromosome	2	41	2044580	2044619	8.5e-15	Chromosome	46	90	2059882	2059926	6.6e-16
52250_2	CGAAGGTGGCGGAATTGGCCCACAATGCGAAGGTGGCGGAATTGGCG	Chromosome	1	18	4606285	4606268	0.0053	Chromosome	22	45	3982601	3982624	2.5e-06
52251_2	CGAAGGTGGCGGAATTGGTCCACAATGCGAAGGTGGCGGAATTGGTA	Chromosome	1	19	4606285	4606267	0.0015	Chromosome	22	47	3982601	3982626	1.9e-07
52853_2	CGGGGGGCAACAAGGGGATTGATATCGCTTTTCCTTGCCATAGACACCAGCCCTGTCTTCCCCCAC	Chromosome	2	28	2867926	2867900	9.2e-08	Chromosome	29	66	4106330	4106367	3.3e-12
54291_2	CTGTCACGCAGGGGGTCGCGGGTTCGAGTCCCGTCCGTTCCAGTGCTGTCACGCAGGGGGTCGCGGGTTCGAGTCACGTCCGTTCCGCCAC	Chromosome	1	41	228960	229000	2.4e-15	Chromosome	46	91	236963	237008	1.8e-16
54293_2	CTGTCACGCAGGGGGTCTCGGGTTCGAGTCCCGTCCGTTCCAGTGCTGTCACGCAGGGGGTCTCGGGTTCGAGTCCCGTCCGTTCCGCCAC	Chromosome	1	41	3946904	3946944	1.1e-13	Chromosome	46	91	236963	237008	1.8e-16
54290_2	CTGTCACGCAGGGGGTCGCGGGTTCGAGTCCCGTCCGTTCAGTGCTGTCACGCAGGGGGTCGCGGGTTCGAGTCCCGTCCGTTCCGCCAC	Chromosome	1	40	3946904	3946943	8.4e-15	Chromosome	45	90	236963	237008	3.9e-18
54292_2	CTGTCACGCAGGGGGTCGCGGGTTCGAGTCCCGTCCGTTCCGCTGTCACGCAGGGGGTCGCGGGTTCGAGTCCCGTCCGTTCCGCCAC	Chromosome	1	43	236963	237005	1.7e-16	Chromosome	43	88	228960	229005	3.8e-18
54806_2	CTTGCTGTGCGTAGTCTTTGCCCATCTCCCTGTCTGTCGCTTTAGACTATACACAGCATAC	Chromosome	2	30	1770432	1770460	2.9e-07	Chromosome	31	60	1216685	1216714	1.8e-09
54807_2	CTTGCTGTGTGTAGTCTTTGCCCATCTCCCTGTCTGTCGCTTTAGACTATACACAGAATAC	Chromosome	2	30	1770432	1770460	6.3e-09	Chromosome	31	60	1216685	1216714	8.2e-08
54808_2	CTTGCTGTGTGTAGTCTTTGCCCATCTCCCTGTCTGTCGCTTTAGACTATACACAGCATACG	Chromosome	2	30	1770432	1770460	6.5e-09	Chromosome	31	60	1216685	1216714	1.8e-09
56182_2	GAACGGCGGACTGTTAATCCCCACGGTGGAACGGCGGACTGTTAATCCG	Chromosome	1	20	2058081	2058062	0.00044	Chromosome	24	49	2044565	2044590	9.5e-06
57561_2	GACTGCCGAAGCCATGACGGGGGCGCTGGCCCTCTCGCCAGCGTCGCCCCG	Chromosome	2	30	3818907	3818935	4.7e-09	Chromosome	33	50	2947766	2947783	0.0062
57899_2	GAGCCTGCATGGGATGGTAAATGCCACAGTGGAGCCTGCATGGGATGGTAAATGG	Chromosome	12	34	4001714	4001692	1.2e-05	Chromosome	35	55	1463848	1463868	0.00015
62219_2	GGATAAGGGTGAGGTCGGTGGTTCAAGTCCACTCAGGCCTAGGGATAAGGGTGAGGTCGGTGGTTCAAGTCCACTCAGGCCTACCAG	Chromosome	2	41	4037175	4037214	8e-15	Chromosome	44	86	225415	225457	1.7e-16
62663_2	GGGACACCATCCCTGTCTTCCCCCACATGATTAAGGGGTGTTGTAAGGGGATGGCTGGCCTGATAG	Chromosome	3	29	4106344	4106370	9.2e-08	Chromosome	30	65	461349	461384	9.1e-13
62742_2	GGGTGATCAACTCAGCTGGGAGAGCACCTCCCTGACAGTTGGGTGATCAGCTCAGCTGGGAGAGCACCTCCCG	Chromosome	1	37	781068	781104	3e-08	Chromosome	40	72	2521050	2521082	2.3e-09
62846_2	GGTAGAACGGCGGACTGTTAATCCGTATGTCACTGGTTCAACAGTGGGTAGAACGGCGGACTGTTAATCCGTATGTCACTGGTTCGC	Chromosome	1	39	2058085	2058047	2.9e-14	Chromosome	42	86	2059863	2059907	6.2e-16
62881_2	GGTCACGCAGGGGGTCGCGGGTTCGAGTCCCGTCCGTTCCGGGGTCACGCAGGGGGTCGCGGGTTCGAGACCCGTCCGTTCCGCCACCCTA	Chromosome	2	41	228962	229001	8.5e-15	Chromosome	44	91	3946906	3946953	1.4e-17
63303_2	GTAATCCGTATGTCACTGGTTCGAGTCCAGTCAGAGGAGCCAGTGGTAATCCGTATGTCACTGGTTCGAGTCCAGTCAGAGGAGCCAG	Chromosome	2	42	2059886	2059926	2.3e-15	Chromosome	44	87	2058070	2058027	2.3e-15
64134_2	GTTCAGTCGGTAGAACGGCGGACTGTTAATCCTACAGTGGTTCAGTCGGTAGAACGGCGGACTGTTAATCA	Chromosome	1	32	2044558	2044589	1.7e-10	Chromosome	37	70	2058096	2058063	6.1e-10
64382_2	GTTGCTGTGAGTAGTCTTTGCCCATCTCCCATGGCAGAACCGCCGGGGCATGATGGGCGAGGCT	Chromosome	2	31	1770432	1770461	8.8e-08	Chromosome	31	63	670772	670740	4.1e-11
64383_2	GTTGCTGTGCGTAGTCTTTGCCCATCTCCCATGGCAGAACCGCCGGGGCATGATGGGCGAGGCT	Chromosome	2	31	1770432	1770461	8.8e-08	Chromosome	31	63	670772	670740	4.1e-11
64384_2	GTTGCTGTGTGTAGTCTTTGCCCATCTCCCATGGCAGAACCGCCGGGGCATGACGGGCGAGGCT	Chromosome	2	31	1770432	1770461	1.9e-09	Chromosome	31	63	670772	670740	1.9e-09
65835_2	GTTTTCCTTGCCATAGACACCGCACAGTGGCTTTCCTTGCCATAGACACCG	Chromosome	1	21	4106329	4106349	0.00013	Chromosome	21	40	3040785	3040766	0.00048
66563_2	TAACTGGAGGAAGGTGGGGATGACGTCAAGTCATCACTTTCCTTGCCAGACACCATCCCTGTCTTCCCCC	Chromosome	2	36	3427593	3427559	3.6e-12	Chromosome	38	70	4106331	4106365	3.6e-07
67537_2	TAGGCAAACCAACGGATAAACCAAACCCGGTGTGCGGTCCGACAGTGTAGGCAAACCAACGGATAAACCAAACCCGGTGTGCGGTCCGGTG	Chromosome	2	41	3667137	3667098	4e-13	Chromosome	46	90	1571605	1571561	3.1e-14
67538_2	TAGGCAAACCAACGGATAAACCAAACCTGGTGTGCGGTCACAGTGTAGGCAAACCAACGGATAAACCAAACCTGGTGTGCGGTCCGGTG	Chromosome	2	39	3667137	3667100	1.1e-13	Chromosome	44	88	1571605	1571561	6.4e-16
67539_2	TAGGCAAACCAACGGATAAACCAAACCTGGTGTGCGGTCCACAGTGTAGGCAAACCAACGGATAAACCAAACCTGGTGTGCGGTCCGGTG	Chromosome	2	40	3667137	3667099	3e-14	Chromosome	45	89	1571605	1571561	6.5e-16
68207_2	TATGGGAGTGGGTTGCAAAAGAAGTTTCCGCAAAGAAAAATAACTCCCACTCTCTGCACACGG	Chromosome	2	25	2729745	2729722	4e-06	Chromosome	26	62	4085910	4085874	1.1e-11
73437_1	AAAAGTCAGCGAAGGAAATGCTTCTGGCTTTTGACACGAAACGTAAAAACCCTCATCGCTGCGGCGG	Chromosome	2	36	1923066	1923100	1.6e-10	Chromosome	39	66	1169078	1169105	2.6e-08
74740_1	AAACGGTTTATTAGTCTGGAGACGACTGGGATACCGACAGCGATGTGCTGTCACTGCTGGATGTGGTGCGG	Chromosome	2	24	3664905	3664927	1.7e-05	Chromosome	24	70	1554580	1554534	7.8e-19
74982_1	AAAGAATATGGCAGGAATTCTGAGTTGTTTTGGCGGATTGAGAGAAGATTTTCAGCCTGATACAGATTAAATCC	Chromosome	2	25	1822250	1822227	5e-06	Chromosome	26	73	228676	228723	2.3e-19
75800_1	AAATATCTCCTTTCGTGTTCCCGGTCACAGTGAAATATCTCCTTTCGTGTGCCCGGC	Chromosome	16	33	408392	408409	0.0074	Chromosome	34	56	169823	169845	1.2e-05
76925_1	AACATCGCCGTCGAGCTGGAGTTCTTGCAGGGTCGCACCCAAATCAGGTCATGGACTGAATAACAAACTGCTGCAGGCTGACCTGGCGAG	Chromosome	2	41	3394277	3394316	8.4e-15	Chromosome	41	89	107340	107388	8.4e-15
80476_1	AAGTTTCATCCCGACCCCATCGAGTCTCCTTGTTTCGATTTTAGCTCGCACTCGG	Chromosome	1	18	2025260	2025243	0.007	Chromosome	19	50	3658038	3658007	1.2e-05
80935_1	AATACAGTGCACTGACGAGGCGCAGCGCTTTTGCGCCTTGTCGCTGCAGA	Chromosome	11	28	1302628	1302645	0.0059	Chromosome	29	47	3401171	3401153	0.0017
83001_1	AATGTTCTCTCTTCCAGGATGCAGCAGACTGAAATATTATAGCCGCCCCAGTCAGTG	Chromosome	2	33	4190473	4190441	2.6e-07	Chromosome	33	56	4049964	4049987	0.00016
83201_1	AATTACAAGAACCAGGGGCGGAAATTCCAGCCCTCTCGATTGCAGAAAACGCCCCGCTGAAAAGTAATTCATAACCATCAGTCCTCAATGC	Chromosome	1	42	686840	686799	6.6e-16	Chromosome	42	90	1555851	1555803	8.4e-20
85325_1	ACAACGGACGAGTTAATGACGCTGGTTAACAAGTTCATAAATTGCAGCTAATGGAGTGC	Chromosome	1	38	2535734	2535771	5.9e-14	Chromosome	39	58	2710080	2710061	0.0006
85516_1	ACAAGCGTATGGAAGCTGCAGGCTGACAAGCGTATGGAAGCTGCAGACC	Chromosome	2	23	3667155	3667134	3.4e-05	Chromosome	27	46	1571620	1571601	0.00044
86458_1	ACACCGTCATCAGTGCAGGAAAATGCCGATTAGCGGAAAAGAACAACAGATAAAAAGAGACCGAACACG	Chromosome	5	48	1622910	1622867	3.5e-07	Chromosome	45	69	1923097	1923121	1.3e-06
88185_1	ACCTTGAAGTCACTGCACAGTGACCTTGAAGTCACTGCCCGTATCGAGTGTTTCTCAACTCGAAC	Chromosome	4	21	1436052	1436035	0.009	Chromosome	24	64	4158369	4158329	3.2e-12
88241_1	ACGAAAAACGCTGAAAAACATAACCCAAAAAAACCCTTCCTGGATGGAGGGAAATTGAGC	Chromosome	9	32	2167113	2167136	0.00017	Chromosome	31	60	4085963	4085934	1.7e-09
88556_1	ACGAGCGGACAACTGCTAGCCCTACTGGTTGTCGTGCTAATTCCCCGAGAGCGTTG	Chromosome	5	36	2725235	2725204	1.2e-10	Chromosome	37	56	3210993	3211012	0.00056
92993_1	AGCAACTCACGTTCCCAGTAGTAAACCCTGTTTTCCTTGCCATGAAATCAATGTTGGCGGGTATCGGGATTGGTGTCT	Chromosome	1	43	4106300	4106342	1.5e-16	Chromosome	45	77	1167605	1167637	5.4e-11
93017_1	AGCACAAGATACTCTTACTGATCAGCAAAACGCTCACTTTTAGCGCACGGCTCTCTCC	Chromosome	9	36	1578913	1578886	9.8e-07	Chromosome	36	58	1923177	1923155	1.3e-05
94617_1	AGTAATCCGATTTAAATATCGAGAGCGTGGTGCCCGGATAGGCCACCTCATGTTC	Chromosome	2	23	3658054	3658033	4.2e-05	Chromosome	22	55	2222557	2222524	9e-07
94875_1	AGTCACGCAGGGGGTCGCGGGTTCGAGTCCCGTCCGTTCCGGAGTCACGCAGGGGGTCGCGGGTTCGAGTCCCGTCCGTTCCGCCACCCTA	Chromosome	2	41	228962	229001	8.5e-15	Chromosome	44	91	3946906	3946953	3e-19
95024_1	AGTGAATGCCAGCGCGACATTTGTACTTCATTATGACTGAGTAGGGATGGATAATTCATGGCTGGGGCGATTATTCTTAAAGAG	Chromosome	1	38	1003915	1003952	9.9e-14	Chromosome	42	76	3804983	3804949	2.1e-10
96025_1	ATAATCCGTATGTCACTGGTTCGAGTCCAGTCAGAGGAACAGTGATAATCCGTATGTCACTGGTTCGAGTCCAGTCAGAGGAGCCAT	Chromosome	2	38	2044584	2044620	3.7e-13	Chromosome	43	86	2058070	2058027	2.2e-15
96034_1	ATAATCCGTATGTCACTGGTTCGAGTCCAGTCAGAGGAGCCAGTGTTAATCAGTATGTCACTGGTTCGAGTCAAGTCAGAAGAGCCAG	Chromosome	2	42	2059886	2059926	2.3e-15	Chromosome	44	87	2062292	2062335	4.9e-12
96035_1	ATAATCCGTATGTCACTGGTTCGAGTCCAGTCAGAGGAGCCAGTTATAATCCGTATGTCACTGGTTCGAGTCCAGTCAGAGGAGCCAT	Chromosome	2	42	2058067	2058027	2.3e-15	Chromosome	47	87	2062295	2062335	2.3e-15
96033_1	ATAATCCGTATGTCACTGGTTCGAGTCCAGTCAGAGGAGCCAGTGATAATCCGTATGTCACTGGTTCGAGTCCAGTCAGAGGAGCCAT	Chromosome	2	42	2062295	2062335	2.3e-15	Chromosome	44	87	2058070	2058027	2.3e-15
96047_1	ATAATCCGTATGTCACTGGTTCGAGTCCAGTCAGAGGGGCCACAGTGATAATCCGTATGTCACTGGTTCGAGTCCAGTCAGAGGGGCCAG	Chromosome	2	42	2044584	2044624	1.1e-13	Chromosome	46	89	2058070	2058027	1.1e-13
96044_1	ATAATCCGTATGTCACTGGTTCGAGTCCAGTCAGAGGAGCCGTGATAATCCGTATGTCACTGGTTCGAGTCCAGTCAGAGGAGCCAT	Chromosome	2	41	2062295	2062334	8e-15	Chromosome	43	86	2058070	2058027	2.2e-15
96644_1	ATAGCGCGTGGAAATTTGGTTTGGGGAGACTTTACCTGCTTTTTCACTTCCTGTACCTTTACCC	Chromosome	1	37	2710052	2710016	2.4e-13	Chromosome	40	64	2942825	2942849	5.3e-05
98158_1	ATCTAGTTAGTGCTGATTATGTATGAAGCTCTTTTAGTTGTTTATTTGATGTAGTGATTTTGCACGCA	Chromosome	14	43	3322510	3322481	9.6e-08	Chromosome	40	68	1517108	1517080	7.4e-09
99418_1	ATCTCGTACAGTGCCAAGCGTATGGAAGCTGCAGGCAAACCAAGCGTATGGAAGCTGCAGGCAAACCAACGG	Chromosome	15	43	1571620	1571592	8.1e-09	Chromosome	41	72	3667155	3667124	1.7e-10
100056_1	ATCTGCCACAGAGTAGGTGGGGTAACGGCTCACCTAGGTGGGGTAACGGCTCACCTAGG	Chromosome	12	38	3942057	3942083	7.7e-08	Chromosome	35	59	4166910	4166934	1e-06
100355_1	ATCTGCTGTGACAGGATAGAAGAAAAATTAAGGGCGGCGTTCCAACCAAGCGTATGGAAGCTGCAGGTAAACCAACGGATAGAGAT	Chromosome	14	47	454488	454521	1.7e-11	Chromosome	47	81	3667155	3667121	2.2e-10
103556_1	ATTGCTATGTGTAGTCTTTGCCCATCTCCAGGGCTGATTTATTACTACACACAGCAGAG	Chromosome	1	29	1770431	1770459	2.8e-07	Chromosome	30	57	1103308	1103281	2.2e-08
103559_1	ATTGCTGCGTGTAGTCTTTGCCCATCTCCAGGGCTGATTTATTACTACACACAGCAGAG	Chromosome	1	29	1770431	1770459	2.8e-07	Chromosome	30	57	1103308	1103281	2.2e-08
103561_1	ATTGCTGTGTGTAGTCTTTGCCCATCTCCAGGGCTGATTCATTACTACACACAGCAGAG	Chromosome	1	29	1770431	1770459	6e-09	Chromosome	30	57	1103308	1103281	1e-06
103560_1	ATTGCTGTGTGTAGTCTTTGCCCATCTCCAGGGCTGATTATTACTACACACAGCAGAG	Chromosome	1	29	1770431	1770459	5.8e-09	Chromosome	30	56	1103308	1103281	0.00016
103568_1	ATTGCTGTGTGTAGTCTTTGCCCATCTCCCCTGTCTGTCGCTTAAGACTATACACAGCATAC	Chromosome	1	30	1770431	1770460	1.8e-09	Chromosome	32	61	1216685	1216714	8.4e-08
103569_1	ATTGCTGTGTGTAGTCTTTGCCCATCTCCCTGTCTGTCGCTTTAGACTATACACAGCATAC	Chromosome	1	30	1770431	1770460	1.8e-09	Chromosome	31	60	1216685	1216714	1.8e-09
103567_1	ATTGCTGTGTGTAGTCTTTGCCCATCTCCAGGGCTTATTTATTACTACACACAGCAGAG	Chromosome	1	29	1770431	1770459	6e-09	Chromosome	30	57	1103308	1103281	1e-06
103570_1	ATTGCTGTGTGTAGTCTTTGCCTATCTCCAGGGCTGATTTATTACTACACACAGCAGAG	Chromosome	1	29	1770431	1770459	2.8e-07	Chromosome	30	57	1103308	1103281	2.2e-08
104244_1	ATTTCCCGTGCCAACAGGGAGTGTTATAACGGTTTATTAGTCTGTCATATACCTGGCGAATTAATCGGTATAGCAGATGTAATATG	Chromosome	2	44	3664879	3664921	1.7e-16	Chromosome	47	85	3888649	3888687	1.3e-12
104409_1	ATTTCCCTGGTGTTGGCGCAGTAAGTAGTTTCATTGCTGACTTTAAGCATTTCAAACCAGGGGACACCA	Chromosome	1	23	3350641	3350663	1.6e-05	Chromosome	22	68	2187075	2187121	7.5e-19
105573_1	ATTTTCCTTGCCATAGACACCATCCCTGTCTTCCCCCACATGCAACGTGATATAGCAGAAATCCTTCTTGAAGGTTTACGTG	Chromosome	2	43	4106330	4106371	5.7e-16	Chromosome	42	81	3913642	3913603	3.4e-13
105793_1	ATTTTGACAGGCGGGAGGTCAATTTGAATTAGCGAGTAAGAACCGCATCTGGTG	Chromosome	1	27	2816462	2816436	6.7e-08	Chromosome	28	53	1300878	1300903	0.00052
105801_1	ATTTTGACAGGCGGGAGGTCAATTTGACACGGATTATTGTCGCTTGCGGAGGCGCGGTTGCAACGTCTACGATGG	Chromosome	1	27	2816462	2816436	1.1e-07	Chromosome	32	75	2174555	2174512	8.5e-14
105818_1	ATTTTGACAGGCGGGAGGTCAATTTGAGGAGAGTCTAAAAGTTTTGTGCATTGGAAACATGACTCTAAGCAC	Chromosome	1	27	2816462	2816436	1e-07	Chromosome	30	66	174996	175032	1.3e-06
105808_1	ATTTTGACAGGCGGGAGGTCAATTTGACGGGGTGGAGCAGCCTGGTAGCTCGTCGGGCTCATAACCCGAAGAGCGTG	Chromosome	1	27	2816462	2816436	1.1e-07	Chromosome	28	76	3318287	3318239	3.1e-18
106040_1	ATTTTTTCACTTCCTGTACATTTACCCCGTCTGTCCAACACAGACAGGTACAGGAAGAAAAAAACATGGG	Chromosome	2	37	2942824	2942859	4.6e-11	Chromosome	36	69	4429834	4429867	1.3e-11
106046_1	ATTTTTTCACTTCCTGTACATTTACCCTGTCTGTCCAACACAGACCGGTACAGGAAGAAAAAAACATGGG	Chromosome	2	37	2942824	2942859	9.9e-13	Chromosome	36	69	4429834	4429867	6e-10
106042_1	ATTTTTTCACTTCCTGTACATTTACCCTGTCTGTCCAACACAGACAGGTACAGGAAGAAAAAAACAAGGG	Chromosome	2	37	2942824	2942859	9.9e-13	Chromosome	36	69	4429834	4429867	6e-10
106049_1	ATTTTTTCATTTCCTGTACATTTACCCTGTCTGTCCAACACAGACAGGTACAGGAAGAAAAAAACATGGG	Chromosome	2	37	2942824	2942859	4.6e-11	Chromosome	36	69	4429834	4429867	1.3e-11
106047_1	ATTTTTTCACTTCCTGTACATTTACCCTGTCTGTCCAGCACAGACAGGTACAGGAAGAAAAAAACATGGG	Chromosome	2	37	2942824	2942859	9.9e-13	Chromosome	39	69	4429837	4429867	6e-10
106041_1	ATTTTTTCACTTCCTGTACATTTACCCTGTCTGTCCAACACAGACAGGTACAGGAAGAAAAAAAAATGGG	Chromosome	2	37	2942824	2942859	9.9e-13	Chromosome	36	69	4429834	4429867	6e-10
106048_1	ATTTTTTCACTTCCTGTACATTTATCCTGTCTGTCCAACACAGACAGGTACAGGAAGAAAAAAACATGGG	Chromosome	2	37	2942824	2942859	4.6e-11	Chromosome	36	69	4429834	4429867	1.3e-11
106045_1	ATTTTTTCACTTCCTGTACATTTACCCTGTCTGTCCAACACAGACAGGTTCAGGAAGAAAAAAACATGGG	Chromosome	2	37	2942824	2942859	9.9e-13	Chromosome	36	69	4429834	4429867	6e-10
106043_1	ATTTTTTCACTTCCTGTACATTTACCCTGTCTGTCCAACACAGACAGGTACAGGAAGAAAAAACCATGGG	Chromosome	2	37	2942824	2942859	9.9e-13	Chromosome	36	69	4429834	4429867	6e-10
106850_1	CAAAAGAGTAATTTGTTCACGCCGGATGCGGCGTGAACGTGCAAAAGAGTAATTTGTTCACGCCGGATGCGGCGTGAACGCCTTATTC	Chromosome	28	46	146079	146061	0.0038	Chromosome	43	61	1823312	1823330	0.0038
108069_1	CAAAGACGGATTGTTGATGATGAATCAGTGCAAAGACGGATTGTTGATAATGC	Chromosome	2	22	2278312	2278292	0.00014	Chromosome	21	38	1102231	1102248	0.0066
108265_1	CAAAGCGGGTGAAAAGCCCGCTCGCCGGAAGACGTAACAACCGTTCCCACGCACTGA	Chromosome	2	33	4169914	4169945	1.2e-10	Chromosome	34	57	3811631	3811608	3.4e-06
109272_1	CAAATAAAGGCATATAATAGAGATTGTCACTGCTGAAAAACATAGTACATAAACTACG	Chromosome	1	22	2312781	2312760	0.0021	Chromosome	20	37	619512	619495	0.0076
110008_1	CAAATTGCAGCTAATGGAGTGGCTTTCCTTGCCATAGACACCAACCCTGTCGACCCCCACGTGT	Chromosome	1	23	2710081	2710059	1.5e-05	Chromosome	24	63	4106331	4106370	2.4e-08
110572_1	CAACAGATAAATAGAGACCGAACACGATTCCGGCGGAAATTCCAGCCCTCTCGATTGTTACGAAGAACGGC	Chromosome	2	31	1923097	1923126	1e-07	Chromosome	32	70	686824	686786	4.7e-11
110929_1	CAACAGGGAGTGTTATAACGGTTTATTAGTCTGGAGACGGAAAGAAGCAATTCCGCGGGGTAAGTTCAAAAAAGTTGATGTGCTGAAGGCG	Chromosome	1	40	3664889	3664928	8.5e-15	Chromosome	41	91	3448020	3447970	6.6e-16
112001_1	CAACATGATCTTGCGCAGATTGTAGCTGAGAATTTTCCTTTCAA	Chromosome	2	25	1934803	1934780	2.2e-06	Chromosome	25	44	3792853	3792834	0.00036
112385_1	CAACCGAGATTCCCCCAGTAGCGGCGAGCGAACGGGGAGGCAACCGAGATTCCCCCAGTAGCGGCGAGCGAACGGGTAGCAGCCCAGAG	Chromosome	1	40	225983	226022	8.3e-15	Chromosome	41	89	4037743	4037791	3.8e-18
112769_1	CAACGCATGGCAAAACATTCCTGGTACAGTGCAATGCATGGCAAAACATTCCTGG	Chromosome	2	23	3696806	3696827	4.2e-05	Chromosome	21	39	3305877	3305859	0.0019
114267_1	CAACTATGGAGCATCTGCACATGAAAACCCGTACACAACAAATCGTATGAATCACCAGAATAAATAAAGTCGATGATAGTAATACTG	Chromosome	2	43	4217090	4217131	6.2e-16	Chromosome	42	85	1301025	1301068	1e-13
116834_1	CAAGGGTCCTGAAGGAACGTTGAAGACGACGACGTTGATAGTTGAGCTAACCGGTACTAATG	Chromosome	2	41	3423985	3423946	5e-15	Chromosome	41	62	2726321	2726300	5e-05
118795_1	CAATCCGTATGTCACTGGTTCGAGTCCAGTCAGAGGAGCGAATCCGTATGTCACTGGTTCGAGTCCAGTCAGAGGAGCG	Chromosome	2	42	2059887	2059927	9.1e-14	Chromosome	41	78	2044585	2044622	9.1e-14
118794_1	CAATCCGTATGTCACTGGTTCGAGTCCAGTCAGAGGAGCGAAATCCGTATGTCACTGGTTCGAGTCCAGTCAGAGGAGCG	Chromosome	2	44	2058066	2058024	7.2e-15	Chromosome	42	79	2059887	2059924	9.3e-14
120719_1	CAATTTACGCACCAGCCGGACGGTTCTAATGAACTAGAATTTACTGTCAGGGATGAACTGGGC	Chromosome	2	22	638310	638290	0.00019	Chromosome	24	63	3741735	3741696	5.1e-10
121323_1	CACAAGGAGGGGGTCGGCGGTTTGATCCCGTCATCACCCAACAGTGCACAAGGAGGGGGTCGGCGGTTTGATCCCGTCATCACCCC	Chromosome	2	43	781102	781143	1.3e-12	Chromosome	48	85	2520965	2521002	4.7e-12
122502_1	CACATCCTGCTGAATGGTGAAAAACCGACTCAGGAACAGTAATTACAAAAAGTGCTTTCTGAACTGAAG	Chromosome	2	41	754206	754167	5.8e-15	Chromosome	41	68	4049848	4049875	2.7e-08
123269_1	CACCCTGTCTGTCCATAGTGATTAATGTAGCACCCTCGTTGGTGGTAGCTGCGGCGACAGGACCAGTGGGGGCGACGGTGGGGCAG	Chromosome	2	34	2942846	2942878	6.1e-11	Chromosome	37	85	1519481	1519529	7.8e-20
123270_1	CACCCTGTCTGTCCATAGTGATTAATGTAGCACCGCCGTGGTAGCTGCGGCGACAGGACCAGTGGGGGCGACGGTGGGGCAG	Chromosome	2	37	2942846	2942881	1.2e-12	Chromosome	38	81	1519486	1519529	4.4e-17
123268_1	CACCCTGTCTGTCCATAGTGATTAATGTAGCACCACCTCGTCGTTGGTGGTAGCTGCGGCGACAGGACCAGTGGGGGCGACGGTGGGGCAG	Chromosome	2	38	2942846	2942882	1.8e-11	Chromosome	42	90	1519481	1519529	8.4e-20
123271_1	CACCCTGTCTGTCCATAGTGATTAATGTAGCACCGCCGTTGGTGGTAGCTGCGGCGACAGGACCAGTGGGGGCGACGGTGGGGCAG	Chromosome	2	37	2942846	2942881	1.3e-12	Chromosome	37	85	1519481	1519529	7.8e-20
123272_1	CACCCTGTCTGTCCATAGTGATTAATGTAGCACCGCCTCCGTTGGTGGTAGCTGCGGAGACAGGACCAGTGGGGGCGACGGTGGGGCAG	Chromosome	2	38	2942846	2942882	3.8e-13	Chromosome	40	88	1519481	1519529	3.8e-18
123273_1	CACCCTGTCTGTCCATAGTGATTAATGTAGCACCGCCTCGCGTTGGTGGTAGCTACGGCGACAGGACCAGTGGGGGCGACGGTGGGGCAG	Chromosome	2	38	2942846	2942882	3.9e-13	Chromosome	41	89	1519481	1519529	3.9e-18
123276_1	CACCCTGTCTGTCCATAGTGATTAATGTAGCACCGCCTCGGTTGGTGGTAGCTGCGGCGACAGGACCAGTGGGGGCGACAGTGGGGCAG	Chromosome	2	38	2942846	2942882	3.8e-13	Chromosome	41	88	1519482	1519529	1.4e-17
123279_1	CACCCTGTCTGTCCATAGTGATTAATGTAGCACCGCCTCGTCGTTGGTGGTAGCTACGGCGACAGGACCAGTGGGGGCGACGGTGGGGCAG	Chromosome	2	38	2942846	2942882	4e-13	Chromosome	42	90	1519481	1519529	3.9e-18
123278_1	CACCCTGTCTGTCCATAGTGATTAATGTAGCACCGCCTCGTCGTTGGTGGTAGCAGCGGCGACAGGACCAGTGGGGGCGACGGTGGGGCAG	Chromosome	2	38	2942846	2942882	4e-13	Chromosome	42	90	1519481	1519529	3.9e-18
123277_1	CACCCTGTCTGTCCATAGTGATTAATGTAGCACCGCCTCGTCGTTGGTAGTAGCTGCGGCGATAGGACCAGTGGGGGCGACGGTGGGGCAG	Chromosome	2	38	2942846	2942882	4e-13	Chromosome	42	90	1519481	1519529	1.8e-16
123275_1	CACCCTGTCTGTCCATAGTGATTAATGTAGCACCGCCTCGCGTTGGTGGTAGCTGCGGCGACAGGACCAGTGGGGGCGACGATGGGGCAG	Chromosome	2	38	2942846	2942882	3.9e-13	Chromosome	41	89	1519481	1519529	3.9e-18
123274_1	CACCCTGTCTGTCCATAGTGATTAATGTAGCACCGCCTCGCGTTGGTGGTAGCTGCGGCGACAGGACCAGTGGGGGCGACAGTGGGGCAG	Chromosome	2	38	2942846	2942882	3.9e-13	Chromosome	41	89	1519481	1519529	3.9e-18
123280_1	CACCCTGTCTGTCCATAGTGATTAATGTAGCACCGCCTCGTCGTTGGTGGTAGCTGCGGCGACAGGACCAGTGGGGGCAACGGTGGGGCAG	Chromosome	2	38	2942846	2942882	4e-13	Chromosome	42	90	1519481	1519529	3.9e-18
123282_1	CACCCTGTCTGTCCATAGTGATTAATGTAGCACCGCCTCGTCGTTGGTGGTAGCTGCGGCGACAGGACCAGTGGGGGCGACGGTGGGGCAC	Chromosome	2	38	2942846	2942882	4e-13	Chromosome	42	90	1519481	1519529	8.4e-20
123281_1	CACCCTGTCTGTCCATAGTGATTAATGTAGCACCGCCTCGTCGTTGGTGGTAGCTGCGGCGACAGGACCAGTGGGGGCGACGGTGGGGCAA	Chromosome	2	38	2942846	2942882	4e-13	Chromosome	42	91	1519481	1519530	2.3e-20
123284_1	CACCCTGTCTGTCCATAGTGATTAATGTAGCACCGCCTCGTCGTTGGTGGTAGCTGCGGCGACAGGACCAGTGGGGGCGACGGTGTGGCAG	Chromosome	2	38	2942846	2942882	4e-13	Chromosome	42	90	1519481	1519529	3.9e-18
123283_1	CACCCTGTCTGTCCATAGTGATTAATGTAGCACCGCCTCGTCGTTGGTGGTAGCTGCGGCGACAGGACCAGTGGGGGCGACGGTGGGGTAG	Chromosome	2	38	2942846	2942882	4e-13	Chromosome	42	88	1519481	1519527	1.1e-18
123285_1	CACCCTGTCTGTCCATAGTGATTAATGTAGCACCGCCTCGTCGTTGGTGGTAGCTGCGGCGACAGGACCAGTGGGGGCGACTGTGGGGCAG	Chromosome	2	38	2942846	2942882	4e-13	Chromosome	42	90	1519481	1519529	3.9e-18
123293_1	CACCCTGTCTGTCCATAGTGATTACTGTAGCACCGCCTCGTCGACAGGACCAGTGGGGGCGACGGTGGGGCAG	Chromosome	2	38	2942846	2942882	1.4e-11	Chromosome	42	72	1519499	1519529	6.3e-10
123290_1	CACCCTGTCTGTCCATAGTGATTAATGTAGCACCGGTTGGTGGTAGCTGCGGCGACAGGACCAGTGGGGGCGACGGTGGGGCAG	Chromosome	2	35	2942846	2942879	1.7e-11	Chromosome	36	83	1519482	1519529	2.7e-19
123288_1	CACCCTGTCTGTCCATAGTGATTAATGTAGCACCGCCTCGTGTGGTAGCTGCGGCGACAAGACCAGTGGGGGCGACGATAGGGCAG	Chromosome	2	38	2942846	2942882	3.7e-13	Chromosome	42	85	1519486	1519529	4.7e-12
123291_1	CACCCTGTCTGTCCATAGTGATTAATGTAGCACCGTTGGTGGTAGCTGCGGCGACAGGACCAGTGGGGGCGACGGTGGGGCAG	Chromosome	2	35	2942846	2942879	1.6e-11	Chromosome	34	82	1519481	1519529	7.5e-20
123286_1	CACCCTGTCTGTCCATAGTGATTAATGTAGCACCGCCTCGTCGTTGGTGGTAGCTGCGGCGACGGGACCAGTGGGGGCGACGGTGGGGCAG	Chromosome	2	38	2942846	2942882	4e-13	Chromosome	42	90	1519481	1519529	3.9e-18
124747_1	CACGCAGGGGGTCGCGGGTTCGAGTCCCGTCCGTTCCGCTACAGTGCACGCAGGGGGACGCGGGTTCGAGTCCCGTCCGTTCCGCCAG	Chromosome	1	42	228964	229005	2.9e-14	Chromosome	47	87	3946908	3946948	1.1e-13
125035_1	CACGGATTGGGTTTAAAAGTATACACAGACTACAGTGCACGGATTGGGTTTAAAAGTATACACAGACAACAG	Chromosome	1	36	1632701	1632666	1e-07	Chromosome	38	72	1434595	1434629	8.1e-09
125036_1	CACGGATTGGGTTTAAAAGTATACACAGATAACAAGAGCACGGATTGGGTTTAAAAATATACACAGATAACAG	Chromosome	1	34	1434595	1434628	6.3e-10	Chromosome	39	73	1632701	1632667	8.2e-09
126500_1	CACTCTGTCTGTCCATAGTGATTAATGTAGCACCGCCTGTTGGTGGTAGCTGCGGCGACAGGACCAGTGGGGGCGACGGTGGGGCAG	Chromosome	5	38	2942849	2942882	1.7e-11	Chromosome	39	86	1519482	1519529	2.9e-19
127595_1	CACTTCCTGAGCCGGAACGAATAGTGCTACCTGGGTAACCCTGCGCGGCT	Chromosome	1	25	2942695	2942719	3.6e-05	Chromosome	29	49	3169502	3169482	0.00013
129798_1	CAGATTCGTCGTATCATAGAAAAAGCAATGGATGAGCAAGGTG	Chromosome	1	20	4429789	4429808	0.00035	Chromosome	20	42	1292564	1292542	7.5e-06
129846_1	CAGATTGAACGCTGGCGGCAGGGGTGCTGTAAGGGGATGGCTGGCCTGC	Chromosome	1	22	4208171	4208192	3.4e-05	Chromosome	20	48	461353	461381	2.1e-07
132082_1	CAGGGGGCAACAAGGGGATTGATATCGCTTTTCCTTGCCATAGACACCATCCCTGTCTTCCCCCAC	Chromosome	3	28	2867925	2867900	3.3e-07	Chromosome	29	66	4106330	4106367	7e-14
132095_1	CAGGGGTCAACAAGGGGATTGATATCGCTTTTCCTTGCCATAGACACCATCCCTGTCTTCCCCCAC	Chromosome	3	28	2867925	2867900	1.5e-05	Chromosome	29	66	4106330	4106367	7e-14
134706_1	CAGTTTTGCTCTTTAAAAATGCAGTTTTGCTCTTTAAAAAG	Chromosome	2	20	3426899	3426881	0.0011	Chromosome	23	40	4037394	4037411	0.0041
136964_1	CATATTAGTTGGGCCGATTGTGGCACCACAAAAAACATAACCCATAAAATACC	Chromosome	1	30	4439529	4439558	3e-06	Chromosome	31	50	2167118	2167137	0.00051
138118_1	CATCCCTGTCTTCCCCCACATGAACGAATTTTTTAAGTGCTTCTTGATTAAGCAAGTATAATCCCGACCCCG	Chromosome	1	22	4106349	4106370	6.3e-05	Chromosome	23	71	2025291	2025243	6.2e-15
138829_1	CATCGAGTCTCCTTGTTTCAACTTAAGCTGGCAATTGGATTGCCAGCTTTCTTTTAATGTCGAAACAAGGAGCAG	Chromosome	2	57	3658038	3657983	3.9e-22	Chromosome	56	74	4085845	4085827	0.0031
139079_1	CATCGCGCTGGGTGGTGGTTCCCCGATGCGGTTCACACCAGCAAATCGATCGGGGTGTTGGTGCCTAGAGGC	Chromosome	2	28	1296501	1296475	1e-07	Chromosome	25	43	3097629	3097611	0.0029
139138_1	CATCGCTAGCACCAGGTATAACCAATTTCCCTGGTGTTGGCGCAGTC	Chromosome	2	25	4424523	4424500	2.5e-06	Chromosome	25	46	3350641	3350662	3.2e-05
139140_1	CATCGCTAGCACCAGGTATAACCAATTTCCCTGGTGTTGGCGGAGTG	Chromosome	2	25	4424523	4424500	2.5e-06	Chromosome	25	46	3350641	3350662	0.0015
139134_1	CATCGCTAGAACCAGGTATAACCAATTTCCCTGGTGTTGGCGTGCATCGCTAGCACCAGGTATAACCAATTTCCCTGGTGTTGGCGCAGTG	Chromosome	46	69	4424523	4424500	6.7e-06	Chromosome	69	90	3350641	3350662	8.6e-05
139135_1	CATCGCTAGCACCAGGTATAACCAACTTCCCTGGTGTTGGCGTGCATCGCTAGCACCAGGTATAACCAACTTCCCTGGTGTTGGCGCAGTG	Chromosome	46	70	4424523	4424499	1.9e-06	Chromosome	71	90	3350643	3350662	0.0011
139142_1	CATCGCTAGCACCAGGTATAACCAATTTCCCTGGTGTTGGCGTGCATCGCTAGCACCAGGTATAACCAATTTCCCTGGTGTTGGCGCTGTG	Chromosome	46	69	4424523	4424500	6.7e-06	Chromosome	69	90	3350641	3350662	0.004
139141_1	CATCGCTAGCACCAGGTATAACCAATTTCCCTGGTGTTGGCGTGCATCGCTAGCACCAGGTATAACCAATTTCCCTGGTGTTGGCGCAGGG	Chromosome	46	69	4424523	4424500	6.7e-06	Chromosome	69	89	3350641	3350661	0.00031
139188_1	CATCGCTTGCACCAGGTATAACCAATTTCCCTGGTGTTGGCGTGCATCGCTAGCACCAGGTATAACCAATTTCCCTGGTGTTGGCGCAGTG	Chromosome	46	69	4424523	4424500	6.7e-06	Chromosome	69	90	3350641	3350662	8.6e-05
140426_1	CATCTTTACGATCATCGCGTTGGTCTGGTCGTGGAGCAATGGCTACGTCCTCGTTAAGATGGTGATGAACGACGCGAGCT	Chromosome	1	39	4218749	4218787	1.2e-12	Chromosome	40	80	4177940	4177980	9.3e-14
140470_1	CATCTTTCAGACCTTTTACTTCACGTAATTCGACAACATGCGTGAAGATGAAGGTCTGGG	Chromosome	2	29	4049924	4049951	2.2e-08	Chromosome	29	59	639266	639296	4.8e-10
140468_1	CATCTTTCAGACCTTTTACTTCACGTAATCGGATCTGGCTGGCGTGAAGATGAAGGTCTGGG	Chromosome	2	41	4049924	4049963	2.3e-13	Chromosome	42	61	639277	639296	0.00065
140461_1	CATCTTTCAGACCTTTTACTTCACGTAATCGGATCTGGCTGAATCTGACCCGTAAATTCGACAACATGCGTGAAGATGAAGGTCTGGG	Chromosome	2	44	4049924	4049966	8.1e-15	Chromosome	45	87	639254	639296	8.1e-15
141108_1	CATGAGGCCATCGGCGATATTACGGAATTGCGGTGCTTTTTTTT	Chromosome	1	22	885636	885615	2.8e-05	Chromosome	26	44	2942883	2942901	0.0013
141489_1	CATGCGGCACCAGAAATTGAGTACCACAGTGCATGCGGCACCAGAAATTGAGTAC	Chromosome	13	31	4351618	4351600	0.0019	Chromosome	32	53	1569649	1569628	0.0019
141490_1	CATGCGGCACCAGAAATTGAGTACCACAGTGCATGTGGCACCAGAAATTGAGTAC	Chromosome	13	31	4351618	4351600	0.0019	Chromosome	32	53	1569649	1569628	4.2e-05
141601_1	CATGCTCGCCTGTGCCGCGTTTTCGAGCACAGGCGCAGGCGAACAGTGCATGCTCGCCTGTGCCGCGTTTTCGAGCACAGGCGCAGGCGA	Chromosome	1	19	1943452	1943470	0.004	Chromosome	17	41	491308	491332	1.8e-06
142828_1	CATGTGGTACCAGAAATTGAGTACCACAGTGCATGTGGCACCAGAAATTGAGTAC	Chromosome	13	31	4351618	4351600	0.0019	Chromosome	32	53	1569649	1569628	4.2e-05
142832_1	CATGTGTATCCACCAGTAGAACCCTCTTACAGCTGTGACATATGTTTTCAGAAGTCATGCGTAATATCCTG	Chromosome	2	25	3659007	3659030	4.7e-06	Chromosome	25	67	2174295	2174253	6.1e-10
143436_1	CATTAAGCAGTAAGCCGGTCATAAATTACAGTGCATTAAGCAGGAAGCCGGTCATAAAA	Chromosome	2	25	228879	228902	3.6e-06	Chromosome	29	46	330326	330309	0.0078
144879_1	CATTCAACCGGCGCGTGCTATCGACGCCACAAAGCATTCAACCAGCGCGTGAGATCGACGG	Chromosome	2	26	3706295	3706271	4.9e-05	Chromosome	30	48	4375018	4375036	0.0023
145975_1	CATTCTGGGGCTTGGTGAAATATGATGCTTGCTCGTACCAGACCCCT	Chromosome	1	18	1555199	1555182	0.0053	Chromosome	19	47	1958494	1958466	1.9e-07
145977_1	CATTCTGGGGCTTGGTGAAATATGATGCTTGCTCGTACCAGGTGCATTCTGGGGCTTGGTGAAATATGATGCTAGCTCGTACCAGGCCCCG	Chromosome	19	42	1958494	1958471	6.7e-06	Chromosome	44	62	1555200	1555182	0.004
145976_1	CATTCTGGGGCTTGGTGAAATATGATGCTTGCTCGTACCAGGTACATTCTGGGGCTTGGTGAAATATGATGCTTGCTCGTACCAGGCCCCT	Chromosome	45	62	1555199	1555182	0.014	Chromosome	63	91	1958494	1958466	1.1e-08
145980_1	CATTCTGGGGCTTGGTGAAATATGATGCTTGCTCGTACCTGCATTCTGGGGCTTGGTGAAATATGATGCTTGCTAGTACCAGGCCCCT	Chromosome	19	39	1958494	1958474	0.0003	Chromosome	41	59	1555200	1555182	0.0038
145979_1	CATTCTGGGGCTTGGTGAAATATGATGCTTGCTCGTACCAGTGCATTCTGGGGCTTGGTGAAATATGATGCTAGCTCGAACCAGGCCCCT	Chromosome	19	41	1958494	1958472	2.4e-05	Chromosome	43	61	1555200	1555182	0.004
146995_1	CATTGCTCCGCTCTCTGGCGAGATCGTATGAAAAACATAACCCATAAAATGCTAGCTGTACCAGAA	Chromosome	1	27	2535902	2535928	9.2e-08	Chromosome	29	64	2167116	2167151	9.1e-13
147035_1	CATTGCTGGCAAATTGCGCCTTGTTCATGCCGGATGCGGCGTGCATTGCTGGCAAATTGCGCCTTGTTCATGCCGGATGCGGCGTGAACGA	Chromosome	15	40	361162	361187	2.4e-05	Chromosome	45	71	3512627	3512601	6.7e-06
147034_1	CATTGCTGGAAAATTGCGCTTTGTTCATGCCGGATGCGGCGTGCATTGCTGGCAAATTGCGCTTTGTTCATGCCGGATGCGGCGTGAACGA	Chromosome	15	40	361162	361187	5.2e-07	Chromosome	45	71	3512627	3512601	1.4e-07
147063_1	CATTGCTGTATGTAGTCTTTGCCCATCTCCATTTTTGTCTGTCGCTTTAGACTATACACAGCATAC	Chromosome	2	30	1770431	1770459	3.3e-07	Chromosome	31	65	1216680	1216714	3.3e-12
147053_1	CATTGCTGGCAAATTGCGCTTTGTTCATGCCGGATGCGGCTGCATTGCTGGCAAATTGCGCTTTGTTCATGCCGGATGCGGCGTGAACGA	Chromosome	15	41	361162	361188	1.4e-07	Chromosome	44	70	3512627	3512601	1.4e-07
147123_1	CATTGCTGTGTGTAGTCTTTGCCCATCTCCATTTTTGTCTGTCGCTTAGACTATACACAGCATAC	Chromosome	2	30	1770431	1770459	6.9e-09	Chromosome	31	64	1216680	1216714	2.5e-08
147122_1	CATTGCTGTGTGTAGTCTTTGCCCATCTCCATTTTTGTCTGTCGCTATAGACTATACACAGCATAC	Chromosome	2	30	1770431	1770459	7.1e-09	Chromosome	31	65	1216680	1216714	1.5e-10
147124_1	CATTGCTGTGTGTAGTCTTTGCCCATCTCCATTTTTGTCTGTCGCTTTACACTATACACAGCATAC	Chromosome	2	30	1770431	1770459	7.1e-09	Chromosome	31	65	1216680	1216714	1.5e-10
147118_1	CATTGCTGTGTGTAGTCTTTGCCCATCTCCATTTTTGTCTGCCGCTTTAGACTATACACAGCATAC	Chromosome	2	30	1770431	1770459	7.1e-09	Chromosome	31	65	1216680	1216714	1.5e-10
147127_1	CATTGCTGTGTGTAGTCTTTGCCCATCTCCATTTTTGTCTGTCGCTTTAGACTGTACACAGCATAC	Chromosome	2	30	1770431	1770459	7.1e-09	Chromosome	31	65	1216680	1216714	1.5e-10
147125_1	CATTGCTGTGTGTAGTCTTTGCCCATCTCCATTTTTGTCTGTCGCTTTAGACTATACACAGAATAC	Chromosome	2	30	1770431	1770459	7.1e-09	Chromosome	31	65	1216680	1216714	1.5e-10
147126_1	CATTGCTGTGTGTAGTCTTTGCCCATCTCCATTTTTGTCTGTCGCTTTAGACTATACACAGTATAC	Chromosome	2	30	1770431	1770459	7.1e-09	Chromosome	31	65	1216680	1216714	1.5e-10
147128_1	CATTGCTGTGTGTAGTCTTTGCCCATCTCCATTTTTGTCTGTCGCTTTATACTATACACAGCATAC	Chromosome	2	30	1770431	1770459	7.1e-09	Chromosome	31	65	1216680	1216714	1.5e-10
147130_1	CATTGCTGTGTGTAGTCTTTGCCCCTCTCCATTTTTGTCTGTCGCTTTAGACTATACACAGCATAC	Chromosome	2	30	1770431	1770459	3.3e-07	Chromosome	31	65	1216680	1216714	3.3e-12
147248_1	CATTGGTTCTTCCGAGGCCTGTATGCTCCTGTTAATCCGTATGTCACTGGTTCGAGTCCAGTCAGAGGAGCCCG	Chromosome	1	28	3667212	3667185	3e-08	Chromosome	29	72	2062291	2062334	3.8e-17
147954_1	CATTTCGTCGCAGTGGCGTCACAATGCATTTCGTCGCAGTGGCGC	Chromosome	13	30	1352701	1352718	0.0049	Chromosome	28	45	2668874	2668857	0.0049
150250_1	CCAAGCGTATGGAAGCTGCAGGCAGACTAACGGAGAGACAAGCGTATGGAAGCTGCAGGCAGACTAACGGT	Chromosome	2	34	3667155	3667123	1e-07	Chromosome	39	70	1571620	1571589	3.7e-07
150420_1	CCAATGCGACGTGAAGGATATAGTGGTACAGAGGTAAGATGTTCTATCTTTCAGACCTTTTACTTCACGTG	Chromosome	1	20	4153157	4153138	0.00079	Chromosome	25	70	4049903	4049948	2.8e-18
150587_1	CCACAGAGTAGGTGGAGTAACGGCTCACCTAGGTGGGGTAACGGCTCACCTAGG	Chromosome	7	33	4035780	4035806	3.1e-06	Chromosome	30	54	4208398	4208422	8.7e-07
150591_1	CCACAGAGTAGGTTGGGTAACGGCTCACCTAGGTGGGGTAACGGCTCACCTAGG	Chromosome	7	33	4166908	4166934	3.1e-06	Chromosome	30	54	4035782	4035806	8.7e-07
152977_1	CCATTATCAGCAGTGTAAAAGGGATCTATTACAGTGCCATTATCATCAGGGTAAAAGGT	Chromosome	4	22	4250446	4250464	0.0022	Chromosome	20	37	1772078	1772095	0.0078
153487_1	CCCATTATTAGAAGTTGTGACAATGCGAAGGTCAGGGAGTGTTATAACGGTTTATTAGTCTGGATACGTG	Chromosome	1	32	3982582	3982613	1.7e-10	Chromosome	33	68	3664892	3664927	4.6e-11
153724_1	CCCCAGAGGTATTGATAGGTGAAGTCAACTTCGGGTTGAGCTGATACCGGCATTCCCTGGTTCGAATCCAGGTACCCCAGCCAG	Chromosome	2	41	2976385	2976346	7.6e-15	Chromosome	42	83	696797	696756	5.9e-16
154532_1	CCCTATCAGCAGTGTAAAAGGCACCAGATCACTAGTGCGCGCGGAGTCGCCGCCAGTGAGCAG	Chromosome	4	23	4250447	4250466	0.00067	Chromosome	25	62	427752	427789	3.1e-12
155573_1	CCGATGTCGCATTCCAGATTAACAGTGCCGATGTCGCATTTCAGATTACCAATGC	Chromosome	2	31	1571929	1571900	0.00015	Chromosome	30	54	3667463	3667439	4.2e-05
158848_1	CCTATCAGCAGTGTAAAAGGCAAAGAACCAGGGGCGAAAATTCCAACCCTCTCGATTGTTACGTAGCACGAG	Chromosome	3	23	4250447	4250467	0.00023	Chromosome	23	70	686834	686787	4.8e-16
159051_1	CCTATCAGCAGTGTAAAAGGCACAAGTAATCATTTTCGTTTATAAAATAATGGGAGCTCTCGTCGCATGCAGAC	Chromosome	3	22	4250447	4250466	0.00084	Chromosome	25	73	3453312	3453264	6.4e-15
159529_1	CCTATCAGCAGTGTAAAAGGCTAACAGTGCCTACCAGCAGTGTAAAAGGCG	Chromosome	3	21	4250447	4250465	0.0017	Chromosome	23	40	1874714	1874697	0.0062
160483_1	CCTATCAGCAGTGTAAAGGGTTACAGTGCCTATCAGCAGTGTAAAAGGG	Chromosome	13	30	2071475	2071458	0.0057	Chromosome	31	48	4250447	4250464	0.0057
161668_1	CCTCGCTAGCACCAGGTATAACCAATTTCCCTGGTGTTGGCGCATCGCTAGCACCAGGTATAACCAATTTCCCTGGTGTTGGCGCAGTG	Chromosome	44	67	4424523	4424500	6.5e-06	Chromosome	67	88	3350641	3350662	8.4e-05
162694_1	CCTGCGGCGGCATCTCGGAGATTCCCCACGGTGCCTGCGGCGGCATCCCGCAGATTCCG	Chromosome	1	26	3056142	3056167	2.8e-07	Chromosome	25	42	3141954	3141971	0.0078
162575_1	CCTGATAATCCGTATGTCACTGGTTCGAGTCCAGTCAGAGGGTGCCTGATAATCCGTATGTCACTGGTTCGAGTCCAGTCAGAGGAGCCAG	Chromosome	2	41	2044580	2044619	4e-13	Chromosome	46	90	2058071	2058027	6.6e-16
162719_1	CCTGCTGTGTGTAGTCTTTGCCCATCTCCCTGTCTGTCGCTTTAGACTATACACAGCATAC	Chromosome	3	30	1770433	1770460	2.3e-08	Chromosome	31	60	1216685	1216714	1.8e-09
163135_1	CCTGTAAATCCGTATGTCACTGGTTCGAGTCCAGTCAGAGGGTGCCTGTAAATCCGTATGTCACTGGTTCGAGTCCAGTCAGAGGAGCCAG	Chromosome	2	41	2044580	2044619	4e-13	Chromosome	46	90	2059882	2059926	6.6e-16
163342_1	CCTGTTAATCCGTACGTCACTGGTTCGAGTCCAGTCAGAGGGTGCCTGTTAATCCGTACGTCACTGGTTCGAGTCCAGTCAGAGGAGCCAG	Chromosome	2	41	2058071	2058032	4e-13	Chromosome	46	90	2062291	2062335	6.6e-16
163343_1	CCTGTTAATCCGTACGTCACTGGTTCGAGTCCAGTCAGAGGTGCCTGTTAATCCGTACGTCACTGGTTCGAGTCCAGTCAGAGGAGCCAG	Chromosome	2	45	2044580	2044623	1.1e-13	Chromosome	45	89	2059882	2059926	6.5e-16
163354_1	CCTGTTAATCCGTATGTCACTGGTTCGAGTCCAGTCAGAGGGTGCCTGTTAATCCGAATGTCACTGGTTCGAGTCCAGTCAGAGGAGCCAG	Chromosome	2	41	2062291	2062330	8.5e-15	Chromosome	46	90	2058071	2058027	6.6e-16
163346_1	CCTGTTAATCCGTATGTCACTGGTTCGAATCCAGTCAGAGGGTGCCTGTTAATCCGTATGTCACTGGTTCGAATCCAGTCAGAGGAGCCAG	Chromosome	2	41	2059882	2059921	4e-13	Chromosome	46	90	2062291	2062335	6.6e-16
163348_1	CCTGTTAATCCGTATGTCACTGGTTCGAGTACAGTCAGAGTGCCTGTTAATCCGTATGTCACTGGTTCGAGTCCAGTCAGAGGAGCCAG	Chromosome	2	40	2062291	2062329	1.4e-12	Chromosome	44	88	2059882	2059926	1.4e-17
163356_1	CCTGTTAATCCGTATGTCACTGGTTCGAGTCCAGTCAGAGGGTGCCTGTTAATCCGTATGTCACTGGTTCGAGTCCAGTCAGAGGAGCAAG	Chromosome	2	41	2062291	2062330	8.5e-15	Chromosome	46	88	2044580	2044622	1.8e-16
163353_1	CCTGTTAATCCGTATGTCACTGGTTCGAGTCCAGTCAGAGGGCCTGTTAATCCGTATGTCACTGGTTCGAGTCCAGTCAGAGGAGCCAG	Chromosome	2	41	2044580	2044619	8.3e-15	Chromosome	41	88	2058074	2058027	1.4e-17
163359_1	CCTGTTAATCCGTATGTCACTGGTTCGAGTCCAGTCGTGCCTGTTAATCCGTATGTCACTGGTTCGAGTCCAGTCAGAGGAGCCAG	Chromosome	2	36	2059882	2059916	4.7e-12	Chromosome	41	85	2058071	2058027	1.3e-17
163351_1	CCTGTTAATCCGTATGTCACTGGTTCGAGTCCAGTCAGAGGGCCTGTTAATCCGTATGTCACTGGTTCGAGTCCAGTAAGAGAAGCCAG	Chromosome	2	41	2044580	2044619	8.3e-15	Chromosome	41	88	2058074	2058027	3e-14
163352_1	CCTGTTAATCCGTATGTCACTGGTTCGAGTCCAGTCAGAGGGCCTGTTAATCCGTATGTCACTGGTTCGAGTCCAGTCAGAGGAGACAG	Chromosome	2	41	2062291	2062330	8.3e-15	Chromosome	41	85	2058074	2058030	6.4e-16
163355_1	CCTGTTAATCCGTATGTCACTGGTTCGAGTCCAGTCAGAGGGTGCCTGTTAATCCGTATGTCACTGGTTCGAGTCCAGTCAGAAAAGCCAG	Chromosome	2	41	2058071	2058032	8.5e-15	Chromosome	46	90	2044580	2044624	3.1e-14
163357_1	CCTGTTAATCCGTATGTCACTGGTTCGAGTCCAGTCAGAGGGTGCCTGTTAATCCGTATGTCACTGGTTCGAGTCCAGTCCGAGGAGCCAG	Chromosome	2	41	2062291	2062330	8.5e-15	Chromosome	46	90	2058071	2058027	6.6e-16
163360_1	CCTGTTAATCCGTATGTCACTGGTTCGAGTCCAGTGTGCCTGTTAATCCGTATGTCACTGGTTCGAGTCCAGTCAGAGGAGCCAG	Chromosome	2	35	2058071	2058038	1.7e-11	Chromosome	40	84	2044580	2044624	1.3e-17
163362_1	CCTGTTAATCCGTATGTCACTGGTTCGATTCCAGTCAGAGGGTGCCTGTTAATCCGTATGTCACTGGTTCGAGTCCAGTCAGAGGAGCCAG	Chromosome	2	41	2059882	2059921	4e-13	Chromosome	46	90	2058071	2058027	1.4e-17
163365_1	CCTGTTAGTCCGTATGTCACTGGTTCGAGTCCAGTCAGAGGGTGCCTGTTAGTCCGTATGTCACTGGTTCGAGTCCAGTCAGAGGAGCCAG	Chromosome	2	41	2059882	2059921	4e-13	Chromosome	46	90	2062291	2062335	6.6e-16
163363_1	CCTGTTAATCCGTATGTCGCTGGTTCGAGTCCAGTCAGAGGGTGCCTGTTAATCCGTATGTCGCTGGTTCGAGTCCAGTCAGAGGAGCCAG	Chromosome	2	41	2058071	2058032	4e-13	Chromosome	46	90	2062291	2062335	6.6e-16
163419_1	CCTGTTTCGGCAAGGGGGTCATCCCGACACCGCTTGTATTTTGAAATTCGTTACAAGC	Chromosome	2	28	3944570	3944596	7.5e-08	Chromosome	31	57	2867682	2867656	3.5e-06
165938_1	CCTTTATCAACAGTGTAAAGGGTTACAGTGCCTTTATCAGCAGTGTAAAGGGG	Chromosome	15	32	2071475	2071458	0.0066	Chromosome	31	52	4250443	4250464	0.0018
166625_1	CCTTTATCAGCAGTGTAAAAGGCGAGCGAAGTGGAGCCGGTAC	Chromosome	1	26	4250443	4250468	7.5e-06	Chromosome	23	42	935772	935791	0.00035
166659_1	CCTTTATCAGCAGTGTAAAAGGCTCAATTTTGCGCACGCTGTGTAAAGAGCCGCTGCTCACCGCG	Chromosome	1	23	4250443	4250465	1.5e-05	Chromosome	24	63	2869857	2869818	5.4e-10
168607_1	CGAAGAAGAGGAGATTGCCGCCGGCGTGTGCCAATCGGGGAATGAGTA	Chromosome	1	21	1795638	1795618	0.00012	Chromosome	22	48	1471325	1471351	5.5e-08
168654_1	CGAAGATCGCCTGGAGCTGGAGTGGCATCAGGCGCTGCTGCGTAGTAAGAAAGCCTGAAGTGAGAGTGGCAAAAAGCGCAGCTGCGCG	Chromosome	1	42	3927964	3928005	6.3e-16	Chromosome	46	65	3762123	3762104	0.0011
168722_1	CGAAGGTGGCGGAATTGGTCCACAGTGCGAAGGTGGCGGAATTGGTG	Chromosome	1	19	4606285	4606267	0.0015	Chromosome	22	46	3982601	3982625	3.2e-05
171165_1	CGCAAGGAGGGGGTCGGCGGTTTGATCCCGTCATCACTCAACAATGCACAAGGAGGGGGTCGGCGGTTTGATCCCGCCATCACCCA	Chromosome	3	44	2520966	2521007	6.1e-11	Chromosome	48	86	780799	780837	6.1e-11
171877_1	CGCATCCGTAGCTCAGCTGGATAGAGTACTCGGCTGCGAACGCGCATCGGTAGCTCAGCTGGATAGAGTACTCGGCTGCGAACCGAGCGGG	Chromosome	2	41	2818549	2818510	4e-13	Chromosome	44	90	2817860	2817814	2.4e-15
172144_1	CGCCGCGCTTTTCTGATTATCTAGGATACAGTACGCCGCGCTTGTCTGATTACCTAGGA	Chromosome	2	26	1999409	1999385	1e-06	Chromosome	29	46	1619410	1619393	0.0078
174480_1	CGGCGGCTAACGAACTTAACCACAATACGCTGACATTTTACCGTTACCGTATTCAGGCAGAACACTCCTCACTACTCT	Chromosome	2	32	3890679	3890649	7e-10	Chromosome	34	76	4349376	4349334	3.2e-13
174741_1	CGGGGGGCAACAAGGGGATTGATATAGCTTTTCCTTGCCATAGACACCATCCCCGTCTTCCCCCAC	Chromosome	2	25	2867926	2867903	4.3e-06	Chromosome	29	66	4106330	4106367	3.3e-12
174742_1	CGGGGGGCAACAAGGGGATTGATATCGCTTTCCTTGCCATAGACACCATCCCTGTCTTCCCCCAC	Chromosome	2	28	2867926	2867900	9e-08	Chromosome	29	65	4106331	4106367	2.5e-13
174743_1	CGGGGGGCAACAAGGGGATTGATATCGCTTTTCCTTGCCATAGACACCAACCCTGTCTACCCCCCC	Chromosome	2	28	2867926	2867900	9.2e-08	Chromosome	29	64	4106330	4106365	2e-09
174744_1	CGGGGGGCAACAAGGGGATTGATATCGCTTTTCCTTGCCATAGACACCACCCCTGTCTTCCCCCAC	Chromosome	2	28	2867926	2867900	9.2e-08	Chromosome	29	66	4106330	4106367	3.3e-12
174745_1	CGGGGGGCAACAAGGGGATTGATATCGCTTTTCCTTGCCATAGACACCAGCCCTGTCTTCCACCAC	Chromosome	2	28	2867926	2867900	9.2e-08	Chromosome	29	66	4106330	4106367	1.5e-10
174746_1	CGGGGGGCAACAAGGGGATTGATATCGCTTTTCCTTGCCATAGACACCATCCCAGTCTTCCCCCAC	Chromosome	2	28	2867926	2867900	9.2e-08	Chromosome	29	66	4106330	4106367	3.3e-12
174747_1	CGGGGGGCAACAAGGGGATTGATATCGCTTTTCCTTGCCATAGACACCATCCCGGTCTTCCCCCAC	Chromosome	2	28	2867926	2867900	9.2e-08	Chromosome	29	66	4106330	4106367	3.3e-12
174748_1	CGGGGGGCAACAAGGGGATTGATATCGCTTTTCCTTGCCATAGACACCATCCCTGACTTCCCCCAC	Chromosome	2	28	2867926	2867900	9.2e-08	Chromosome	29	66	4106330	4106367	3.3e-12
174750_1	CGGGGGGCAACAAGGGGATTGATATCGCTTTTCCTTGCCATAGACACCATCCCTGTCATCCCCCAC	Chromosome	2	28	2867926	2867900	9.2e-08	Chromosome	29	66	4106330	4106367	3.3e-12
174749_1	CGGGGGGCAACAAGGGGATTGATATCGCTTTTCCTTGCCATAGACACCATCCCTGTATTCCCCCAC	Chromosome	2	28	2867926	2867900	9.2e-08	Chromosome	29	66	4106330	4106367	3.3e-12
174752_1	CGGGGGGCAACAAGGGGATTGATATCGCTTTTCCTTGCCATAGACACCATCCCTGTCTTCCCCCACAG	Chromosome	2	28	2867926	2867900	9.6e-08	Chromosome	29	67	4106330	4106368	2e-14
174751_1	CGGGGGGCAACAAGGGGATTGATATCGCTTTTCCTTGCCATAGACACCATCCCTGTCTTCCACCAC	Chromosome	2	28	2867926	2867900	9.2e-08	Chromosome	29	66	4106330	4106367	3.3e-12
174753_1	CGGGGGGCAACAAGGGGATTGATATCGCTTTTCCTTGCCATAGACACCATCCCTGTCTTCCTCCAC	Chromosome	2	28	2867926	2867900	9.2e-08	Chromosome	29	66	4106330	4106367	3.3e-12
174754_1	CGGGGGGCAACAAGGGGATTGATATCGCTTTTCCTTGCCATAGACACCGTCATTGTCTACCCACAC	Chromosome	2	28	2867926	2867900	9.2e-08	Chromosome	29	66	4106330	4106367	1.5e-05
174756_1	CGGGGGGCAACAAGGGGATTGATATCGCTTTTCCTTGCCATAGACGCCATCCCTGTCTTCCCCCAC	Chromosome	2	28	2867926	2867900	9.2e-08	Chromosome	29	66	4106330	4106367	3.3e-12
174755_1	CGGGGGGCAACAAGGGGATTGATATCGCTTTTCCTTGCCATAGACACTATCCCTGTCTTCCCCCAC	Chromosome	2	28	2867926	2867900	9.2e-08	Chromosome	29	66	4106330	4106367	3.3e-12
174759_1	CGGGGGGCATCAAGGGGATTGATATCGCTTTTCCTTGCCATAGACACCATCCCTGTCTTCCCCCAC	Chromosome	2	28	2867926	2867900	4.3e-06	Chromosome	29	66	4106330	4106367	7e-14
174760_1	CGGGGGGCGACAAGGGGATTGATATCGCTTTTCCTTGCCATAGACACCATCCCTGTCTTCCCCCAC	Chromosome	2	28	2867926	2867900	4.3e-06	Chromosome	29	66	4106330	4106367	7e-14
174761_1	CGGGGGGGCAACAAGGGGATTGATATCGCTTTTCCTTGCCATAGACACCATCCCTGTCTTCCCCCAC	Chromosome	3	29	2867926	2867900	9.4e-08	Chromosome	30	67	4106330	4106367	7.2e-14
174762_1	CGGGGGTCAACAAGGGGATTGATATCGCTTTTCCTTGCCATAGACACCATACCTGTCATACCCCAC	Chromosome	2	28	2867926	2867900	4.3e-06	Chromosome	29	66	4106330	4106367	7.1e-09
175093_1	CGGTGGGCAACAAGGGGATTGATATCGCTTTTCCTTGCCATAGACACCATCCCTGTCTTCCCCCAC	Chromosome	2	28	2867926	2867900	4.3e-06	Chromosome	29	66	4106330	4106367	7e-14
175102_1	CGGTGGGGTTCCCGAGCGGCACACAGTGCGGTGGGGTTCCAGAGCGGCC	Chromosome	1	20	4175471	4175490	0.00044	Chromosome	24	44	208456	208436	0.0057
176169_1	CGTAGACTTATAATGATAGATAACTGTGATCCAGGCACAGCGTGACTATTTTAGAGCGCATACTTACAAGCC	Chromosome	2	23	2710185	2710164	6.3e-05	Chromosome	27	71	2099950	2099906	1e-12
177067_1	CGTTAATACATTTAACAAAATAACTCACTATTGAACTAAAAATTCAAAAAGCAGTATTTCGGCGAGTAGCGG	Chromosome	2	25	872978	872955	4.8e-06	Chromosome	30	71	3982705	3982746	4.8e-16
177299_1	CGTTCCCGCGCCGACTTCCATCAGGTAGGGTACAGAGGTTAGATGTTCTATCTTTCAGACCTTTTACTTCT	Chromosome	2	21	3725203	3725222	0.00079	Chromosome	25	70	4049899	4049944	1.3e-16
177533_1	CGTTGCTGTGTGTAGTCTTTGCCCATCTCCATTTTTGTCTGTCGCTTTAGACTATACACAGCATAC	Chromosome	3	30	1770432	1770459	2.6e-08	Chromosome	31	65	1216680	1216714	3.3e-12
178008_1	CTAAAAGTTGGCATTAATGCAGGCTCATATCCATGCAAGCATTCACCGCCGGTTTACTGGCGATTTATGTTG	Chromosome	1	25	1923170	1923194	1.3e-06	Chromosome	28	66	1622860	1622822	1e-12
178738_1	CTAATAATAAAAAAATGAAATTCCTCTCTGACGGGCCAATAAATTATGTTGTATGGTTGCTCTGAAACCGTGGGAAGGAGGCGATCATGC	Chromosome	2	41	507228	507267	3.9e-13	Chromosome	42	89	4078804	4078851	1.4e-12
185402_1	CTCTGGAGACGGCAGACTATCCTCCCCGGTCTCACTATGGACAAAACGTCGGGTGAAGCACCCACTTGTTGTCA	Chromosome	2	31	3664918	3664949	1.8e-05	Chromosome	33	74	3986548	3986589	2.3e-09
185461_1	CTCTGTCCATAGTGATTAATGTAGCACCGCCTTAGTGCAATATTTTGTTTTTTGCTGGAGGATAGCAGCAGATCGCG	Chromosome	2	38	2942852	2942888	6.8e-10	Chromosome	40	76	3405232	3405268	1.5e-11
187331_1	CTGGGGGCAACAAGGGGATTGATATCGCTTTTCCTTGCCATAGACACCATCCCTGTCTTCCCCCAC	Chromosome	3	28	2867925	2867900	3.3e-07	Chromosome	29	66	4106330	4106367	7e-14
187358_1	CTGGGGTACCGCCAAGCGGTAAGGCACCGGATTGGGAAAGACGCGCATTTGTTATCATCATCCCTGAATG	Chromosome	2	33	696616	696585	7.7e-09	Chromosome	36	69	2814802	2814835	1.3e-11
187460_1	CTGGTAGAGCACGACCTTGCCAAGGTCGGGGTCGCGAGTTCACAGAGCTGGTAGAGCACGACCTTGCCAAGGTCGGGGTCGCGAGTTCGAC	Chromosome	2	41	4392488	4392527	8.5e-15	Chromosome	46	90	1992104	1992060	6.6e-16
187468_1	CTGGTAGAGCACGACCTTGCCAAGGTCGGGGTCGCGAGTTCGTGCTGGTAGAGCACGACCTTGCCAAGGTCGGGGTCGCGAGTTCGAC	Chromosome	2	42	1992101	1992061	2.3e-15	Chromosome	46	87	4392599	4392640	6.3e-16
187729_1	CTGTCACGCAGGGGGTCACGGGTTCGAGTCCCGTCCGTTCCAGTGCTGTCACGCAGGGGGTCACGGGTTCGAGTCCCGTCCGTTCCGCCAC	Chromosome	1	41	3946904	3946944	1.1e-13	Chromosome	46	91	228960	229005	1.8e-16
187736_1	CTGTCACGCAGGGGGTCGCGGGTTCGAGTCCCGTCCGTTAGTGCTGTCATGCAGGGGGTCGCGGGTTCGAGTCCCGTCCGTTCCGACAC	Chromosome	1	39	236963	237001	3e-14	Chromosome	44	89	228960	229005	8.3e-15
187730_1	CTGTCACGCAGGGGGTCGCAGGTTCGAGTCCCGTCCGTTCCAGTGCTGTCACGCAGGGGGTCGCAGGTTCGAGTCCCGTCCGTTCCGCCAC	Chromosome	1	41	236963	237003	1.1e-13	Chromosome	46	91	228960	229005	1.8e-16
187738_1	CTGTCACGCAGGGGGTCGCGGGTTCGAGTCCCGTCCGTTCCAGTGCTGTCACGCAGGGGGTAGCGGGTTCGAGTCCCGTCCGTTCCACCAC	Chromosome	1	41	3946904	3946944	2.4e-15	Chromosome	46	91	228960	229005	8.5e-15
187739_1	CTGTCACGCAGGGGGTCGCGGGTTCGAGTCCCGTCCGTTCCAGTGCTGTCACGCAGGGGGTCGCGGGTTCCAGTCCCGTCCGTTCCGCCAC	Chromosome	1	41	228960	229000	2.4e-15	Chromosome	46	91	236963	237008	1.8e-16
187733_1	CTGTCACGCAGGGGGTCGCGGGTTCGAGTCCCGTCCGGTCCAGTGCTGTCACGCAGGGGGTCGCGGGTTCGAGTCCCGTCCGTTCCGCCAC	Chromosome	1	41	3946904	3946944	1.1e-13	Chromosome	46	91	236963	237008	3.9e-18
187732_1	CTGTCACGCAGGGGGTCGCGGGTTCGAATCCCGTCCGTTCCAGTGCTGTCACGCAGGGGGTCGCGGGTTCGAATCCCGTCCGTTCCGCCAC	Chromosome	1	41	228960	229000	1.1e-13	Chromosome	46	91	236963	237008	1.8e-16
187741_1	CTGTCACGCAGGGGGTCGCGGGTTCGAGTCCCGTCCGTTCCAGTGCTGTCACGCAGGGGGTCGCGGGTTCGAGTCCCGTCCGTTCCGCAAC	Chromosome	1	41	228960	229000	2.4e-15	Chromosome	46	91	236963	237008	1.8e-16
187735_1	CTGTCACGCAGGGGGTCGCGGGTTCGAGTCCCGTCCGTTAGTGCTGTCACGCAGGGGGTCGCGGGTTCGAGTCCCGTCCGTTCCGCCAC	Chromosome	1	39	236963	237001	3e-14	Chromosome	44	89	228960	229005	3.8e-18
187745_1	CTGTCACGCAGGGGGTCGCGGGTTCGAGTCCCGTCCGTTCCGGTGCTGTCACGCAGGGGGTCGCGGGTTCGAGTCCCGTCCGTTCCGCCAC	Chromosome	1	42	3946904	3946945	6.6e-16	Chromosome	46	91	236963	237008	3.9e-18
187754_1	CTGTCACGCATGGGGTCGCGGGTTCGAGTCCCGTCCGTTGCTGTCACGCATGGGGTCGCGGGTTCGAGTCCCGTCCGTTCCGCCAC	Chromosome	1	39	228960	228998	1.3e-12	Chromosome	41	86	236963	237008	1.7e-16
187755_1	CTGTCACGCCGGGGGTCGCGGGTTCGAGTCCCGTCCGTTCAGTGCTGTCACGCAGGGGGTCGCGGGTTCGAGTCCCGTCCGTTCCGCCAC	Chromosome	1	40	228960	228999	3.9e-13	Chromosome	45	90	3946904	3946949	3.9e-18
187894_1	CTGTGACAAACTCAAAAGCAGACAGGATGTTTCCTTGCCATAGACACCATCCCTGGCTTCCCCCACA	Chromosome	10	33	3897997	3898020	4.4e-06	Chromosome	30	67	4106331	4106368	3.4e-12
188313_1	CTTAAAGTACGTGAAACGAGCCGTTCGACGTAGCTCTGCGTGATATTGGCCATTTTTTTAT	Chromosome	2	41	3210791	3210831	1e-11	Chromosome	42	60	507270	507288	0.0023
189891_1	CTTCATCAGCAGTGTAAAAGGAGCGGCGATATTCGTGGTGTGCAGGAGAG	Chromosome	1	21	4250444	4250464	0.0059	Chromosome	21	48	3997045	3997072	7.6e-07
190994_1	CTTCCAGCCCTCTCGATTGTTACGTAGCATCCTCAGGCATTCTGGCTGAGGAGATTGTTCCGGTTGTGTTGAAAAACA	Chromosome	2	29	686816	686789	3.2e-08	Chromosome	29	78	1461480	1461529	1.9e-20
191776_1	CTTCGCGACGAGAATTACGTGACGAAGCGCGCGGACGAAGATCGTCGACGTTTTGTCGTCAAATTTTATCGCCCTGAACGTTGT	Chromosome	2	34	1888115	1888083	2.8e-09	Chromosome	33	83	4042549	4042599	5.9e-21
192815_1	CTTGCTGCGTGTAGTCTTTGCCCATCTCCCTGTCTGTCGCTTTAGACTATACACAGCATAC	Chromosome	2	30	1770432	1770460	2.9e-07	Chromosome	31	60	1216685	1216714	1.8e-09
192849_1	CTTGCTGTATGTAGTCTTTGCCCATCTCCCTGTCTGTCGCTTTAGACTATACACAGCATAC	Chromosome	2	30	1770432	1770460	2.9e-07	Chromosome	31	60	1216685	1216714	1.8e-09
192851_1	CTTGCTGTGCGTAGTCTTTGCCCATCTCCCTGCCTGTCGCTTTAGACTATACACAGCATAC	Chromosome	2	30	1770432	1770460	2.9e-07	Chromosome	34	60	1216688	1216714	8.2e-08
192854_1	CTTGCTGTGTGTAGTCTTTGCCCATCTCCCTATCTGTCGCTTTAGACTATACACAGCATAC	Chromosome	2	30	1770432	1770460	6.3e-09	Chromosome	33	60	1216687	1216714	2.3e-08
192850_1	CTTGCTGTGAGTAGTCTTTGCCCATCTCCCTGTCTGTCGCTTTAGACTATACACAGCATAC	Chromosome	2	30	1770432	1770460	2.9e-07	Chromosome	31	60	1216685	1216714	1.8e-09
192855_1	CTTGCTGTGTGTAGTCTTTGCCCATCTCCCTGCCTGTCGCTTTAGACTATACACAGCATAC	Chromosome	2	30	1770432	1770460	6.3e-09	Chromosome	34	60	1216688	1216714	8.2e-08
192852_1	CTTGCTGTGTGCAGTCTTTGCCCATCTCCCTGTCTGTCGCTTTAGACTATACACAGCATAC	Chromosome	2	30	1770432	1770460	2.9e-07	Chromosome	31	60	1216685	1216714	1.8e-09
192860_1	CTTGCTGTGTGTAGTCTTTGCCCATCTCCCTGTCTGTCGCTTTAGACTATACACAGTATAC	Chromosome	2	30	1770432	1770460	6.3e-09	Chromosome	31	60	1216685	1216714	8.2e-08
192859_1	CTTGCTGTGTGTAGTCTTTGCCCATCTCCCTGTCTGTCGCTTTAGACTATACACAGCACAC	Chromosome	2	30	1770432	1770460	6.3e-09	Chromosome	31	58	1216685	1216712	2.3e-08
192858_1	CTTGCTGTGTGTAGTCTTTGCCCATCTCCCTGTCTGTCGCTTTAGACTAAACACAGCATAC	Chromosome	2	30	1770432	1770460	6.3e-09	Chromosome	31	60	1216685	1216714	8.2e-08
192861_1	CTTGCTGTGTGTAGTCTTTGCCCATCTCCCTGTCTGTCGCTTTAGACTATGCACAGCATAC	Chromosome	2	30	1770432	1770460	6.3e-09	Chromosome	31	60	1216685	1216714	8.2e-08
193145_1	CTTGTGTTGTTGTGTTTGCAATTGGTCTGCGATGTAACGAATTTTTTAAGTTCTTCTTGCTAG	Chromosome	2	33	2942768	2942799	1.4e-10	Chromosome	33	61	2025294	2025266	3.1e-07
194295_1	CTTTATTACTACACACAGCAGTAGGCATCATAAGCAATATCAGCACCACTTGAATCATCCTCATTAGCGGAT	Chromosome	2	22	1103300	1103280	0.00023	Chromosome	21	43	1597838	1597860	0.00081
195571_1	CTTTCCCTGGTGTTGGCGCAGTTTCCCCGTGCCAACAGGGAGTGTTATAACGGTTTATTAGTCTGGAGACGG	Chromosome	2	22	3350642	3350662	0.00023	Chromosome	26	72	3664882	3664928	7.9e-19
195574_1	CTTTCCCTGGTGTTGGCGCAGTTTTCCCATGCCAACAGGGAGTGTTATAACGGTTTATTAGTCTGGAGACGG	Chromosome	2	26	3350642	3350666	6.3e-05	Chromosome	23	72	3664879	3664928	7.9e-19
195572_1	CTTTCCCTGGTGTTGGCGCAGTTTCCCGTGCCAACAGGGAGTGTTATAACGGTTTATTAGTCTGGAGACGG	Chromosome	2	22	3350642	3350662	0.00022	Chromosome	20	71	3664877	3664928	1.3e-21
196591_1	CTTTCGCCGGAGTCAGGCCGCCACTTCGGTGCGGTTACGTCAGTGCTTTCGCCGGAGTCAGGCCGCCAATTCGGTGCGGTTACGTG	Chromosome	1	41	404831	404790	4.7e-12	Chromosome	46	64	220283	220301	0.0037
197663_1	CTTTGTCCACCGCACGTGACACAGTGCTTTATCCACCGCACGTGT	Chromosome	2	20	1291746	1291764	0.0014	Chromosome	21	39	1947980	1947998	0.0014
197961_1	CTTTTAACTCCGTGTACTGTCGGTTATTTGACCACCGCTCTTAATCCGTATGTCACTGGTTCGAGTCCAGTCAGAGGAGCCAG	Chromosome	2	40	4218901	4218939	2.7e-14	Chromosome	38	82	2058071	2058027	5.8e-16
198264_1	CTTTTAGTTGCCGTGGAAACTTTTCGCCTAGTGCGTGGAAATTTGGTTTGGGGAGACTTTACCTCGGACGAGCGAG	Chromosome	2	29	4056621	4056594	3.1e-08	Chromosome	29	76	2710051	2710004	5.2e-16
200610_1	GAAAAAGAAGGGGCGCTGATTAACGCTACAGTGGAAAAAGAAGGGGCGATGATTAACGC	Chromosome	2	26	4231209	4231233	1e-06	Chromosome	30	48	430434	430452	0.0022
200611_1	GAAAAAGAAGGGGCGCTGATTAACGCTACAGTGGAAAAAGAAGGGGCGCTAATAAACGC	Chromosome	2	26	4231209	4231233	1e-06	Chromosome	30	48	430434	430452	0.0022
200613_1	GAAAAAGAAGGGGCGCTGATTAACGCTACAGTGGAAAAAGAAGGGGCGCTGGTTAACGC	Chromosome	2	26	4231209	4231233	1e-06	Chromosome	30	48	430434	430452	0.0022
202418_1	GAAAGCACTGAAAGACGCGGTAAACTAAGCGTTGTCCCCAGGATGTTGTGTTGTTGTGTTTGCAATGGGTCTGCGAG	Chromosome	2	41	461697	461736	6.8e-15	Chromosome	42	76	2942764	2942798	1.9e-10
203449_1	GAAATAAGTAACAAGGAGCGTTCATGAGCGCAGGGGCCAGAGCAAAAGGCGGAGAAAGCGAAAGCTAAGGAATACATGG	Chromosome	2	30	1035748	1035776	9.2e-09	Chromosome	31	79	4111881	4111833	3.3e-13
204088_1	GAAATTCGGTCTGGCTCCGCTGGGCTGCGGCTGGGTTATCTGTGGAAATTCGGTCTGGCTCCGCTGGGCTGCGGCTGGGTTATCTGGCGC	Chromosome	2	42	1571220	1571180	2.3e-15	Chromosome	46	89	3666755	3666712	5e-17
204870_1	GAACAGGGAGTGTTATAACGGTTTATCAATCTGTAGACAGCTATTGATGATCACACATGAGAAGTAACCTTAAGTGAACCCGTGCAGAG	Chromosome	2	41	3664890	3664929	3.9e-08	Chromosome	39	83	1301670	1301714	3e-14
205122_1	GAACAGGGAGTGTTATAACGGTTTATTAGTCTGGAGACGTTTTAGCTCTTAACCTGGATCGCGACAG	Chromosome	2	39	3664890	3664927	7.2e-14	Chromosome	40	66	4010432	4010458	0.0002
206117_1	GAACCTGCATGGGATGGTAAATGCCACAGTGGAACCTGCATGGGATGGTAAAGGG	Chromosome	12	33	4001714	4001693	4.2e-05	Chromosome	33	55	1463846	1463868	0.00054
206420_1	GAACGCGGCGCTGGTCTCGCTCTGGTTTGTTGGCCAGGCGGCCCAGAGGTATTGATAGGTGAAGTCGACTTCGGGTTGT	Chromosome	2	41	2391370	2391331	3.3e-13	Chromosome	42	78	2976385	2976349	1.5e-11
207987_1	GAACTCTCCGGGTAAACAGGGTTAAGATTGTCGTTAAGTGCGTGATGATTGGGCTTATTTTGGCATCCGTAGTC	Chromosome	2	28	4520385	4520359	1.1e-07	Chromosome	27	74	3151924	3151877	1.1e-17
209568_1	GAAGCCTGCATTAATGCCAACTTTTAGCGCATGTTGTTGTGTTTGCAATTGGTCTGCGATTCAGACCATGGTAGCAAAGCG	Chromosome	2	31	1923195	1923166	2.6e-09	Chromosome	32	80	2942771	2942819	7.2e-20
209786_1	GAAGCCTGCCAAGGTGTGCTGTGAGGCATGCTGGAGGTATCCAGTGGAAGCCTGCGAAGGTGTGCTGTGAGGCATGCTGGAGGTATCAGAC	Chromosome	2	41	4169844	4169883	4e-13	Chromosome	45	90	3425583	3425538	1.8e-16
209820_1	GAAGCCTGCGAAGGTGTGCTGTGAGGCATGCTGGAGGTATCTGGAAGCCTGCGAAGGTGTGCTGTGAGGCATGCTGGAGGTATCAGAC	Chromosome	2	41	2727981	2727942	8.1e-15	Chromosome	40	87	4211241	4211288	1.4e-17
209813_1	GAAGCCTGCGAAGGTGTGCTGTGAGGCATGCTGGAGGTATCAGTGGAAGCCTGCGAAGGTGTGATGTGAGGCATGCTGGAGGTATCAGAC	Chromosome	2	43	2727981	2727940	6.5e-16	Chromosome	44	89	3425583	3425538	8.4e-15
209819_1	GAAGCCTGCGAAGGTGTGCTGTGAGGCATGCTGGAGGTATCTGGAAGCCTGCGAAGGTGTGCTGTGAGGCATGCTGGAGGTAACAGAC	Chromosome	2	41	4211246	4211285	8.1e-15	Chromosome	40	87	3944902	3944949	6.3e-16
209822_1	GAAGCCTGCGAAGGTGTGCTGTGAGGCATGCTGGAGGTCAGTGGAAGCCTGCGAAGGTGTGCTGTGAGGCATGCTGGAGGTATCAGAC	Chromosome	2	38	4169844	4169880	3.8e-13	Chromosome	42	87	3425583	3425538	1.7e-16
210047_1	GAAGCGTATGGAAGCTGCAGGTAAACCCACGGTGGAAGCGTATGGAAGCTGCAGGTAAACCAACGGC	Chromosome	2	32	3667154	3667124	1.2e-06	Chromosome	36	66	1571619	1571589	2.6e-08
210799_1	GAAGTTCCGACCTGCACGAATGGCACGGTATGCGTGTTCTGGTGAGATTTTGGCTTACGGTTGTGATGTG	Chromosome	2	24	4170592	4170614	1.7e-05	Chromosome	26	69	2942725	2942768	3.6e-12
214778_1	GACAAGGAGGGGGTCGGCGGTTCGATCCCGTCATCACCCAACAGTGGACAAGGAGGGGGTCGGCGGTTCGAACCAGTCATCAACCACCG	Chromosome	2	43	781102	781143	3e-14	Chromosome	48	88	2521207	2521247	2.3e-10
214919_1	GACAAGGAGGGGGTCGGCGGTTCGATCCCGTCATCACCCACCAGTGGACAAGGAGGGGGTCGGCGGTTCGATCCAGTCAGCACCCACCG	Chromosome	2	43	781102	781143	6.4e-16	Chromosome	48	88	2521207	2521247	5e-12
214927_1	GACAAGGAGGGGGTCGGCGGTTCGATCCCGTCATCACCCACGTGGACAAGGAGGGGGTCGGCGTTTTGAACCAGTCATCAACCACCG	Chromosome	2	41	780799	780838	8e-15	Chromosome	46	86	2520965	2521005	4.9e-07
214924_1	GACAAGGAGGGGGTCGGCGGTTCGATCCCGTCATCACCCACGGACAAGGAGGGGGTCGGCGTTTCAATTGCGTCAGCACCCACCG	Chromosome	2	41	781102	781141	7.8e-15	Chromosome	44	84	2521207	2521247	4.7e-07
214929_1	GACAAGGAGGGGGTCGGCGGTTCGATCCCGTCATCACCCACTGGACAAGGAGGGGGTCGGCGGTTCGATCCCGTCATCACCCACCG	Chromosome	2	41	2520965	2521004	7.9e-15	Chromosome	45	85	781102	781142	2.2e-15
215086_1	GACACACCATCCCTGTCTTCCCCCACATGATTAAGGGGTGTTGTAAGGGGATGGCTGGCCTGATAG	Chromosome	4	29	4106345	4106370	3.3e-07	Chromosome	30	65	461349	461384	9.1e-13
215284_1	GACAGAAAGGTCCCTAATGAGAGATCCCTGCCATTGTTGCCA	Chromosome	1	21	2433942	2433922	9.3e-05	Chromosome	22	42	1603359	1603379	9.3e-05
215715_1	GACATAAAAAAAACCCGGCATAGATCGGCGTGAAACTAAAAAAACCGGGCGCGAAAAGTGGTAACG	Chromosome	1	23	3664974	3664952	1.5e-05	Chromosome	25	66	3991015	3991056	9.1e-13
217775_1	GACGCAGGGGGTCGCGGGTTCGAGTCCCGTCCGTTCCGCCAGTGGACGCAGGGGGTCGCGGGTTCGAGTCCAGTCCGTGCAGCCA	Chromosome	2	41	3946909	3946948	7.8e-15	Chromosome	46	85	236968	237007	7.8e-10
218489_1	GACGGTTGTGATGTTGTGTTGTTGTGTCTGCAAAACCAGTACCGTGAGGGAAAGGCGAAAAGAACCCCGGCGAGGGGAGTGG	Chromosome	2	33	2942756	2942787	9.6e-09	Chromosome	34	81	2728732	2728685	2.6e-19
219051_1	GACTAATTACAAGAACCAGGGGCGGAAATTCCAGCCCTCTCAGTGTGGGGACTCCATGCGAGAGTAGGGAACAGCCAGGAATG	Chromosome	2	41	686843	686804	7.5e-15	Chromosome	42	79	2726111	2726072	1.6e-06
220246_1	GACTGCCGAAGCCATGACGGGGGCGCTGGCCTTCTCGCCAACGTCGCCCCG	Chromosome	2	30	3818907	3818935	4.7e-09	Chromosome	32	49	1120291	1120274	0.0062
220254_1	GACTGCCGAAGCCATGACGGGTGCGCTGGCCTTCTCGCCAGCGTCGCCCCG	Chromosome	2	30	3818907	3818935	2.2e-07	Chromosome	30	50	2947763	2947783	0.00013
220257_1	GACTGCCGAATCCATGACGGGGGCGCTGGCCTTCTCGCCAGCGTCGCCCCG	Chromosome	2	30	3818907	3818935	2.2e-07	Chromosome	30	50	2947763	2947783	0.00013
220397_1	GACTGGTACTGGGCGCGGTTTTTACCGTTGCATCAGTGGACTGGTACTGGGCGCGGTTTTTACCGTTGCATCATGTCGCCA	Chromosome	40	57	1757435	1757452	0.012	Chromosome	57	80	1958519	1958496	5.7e-06
220403_1	GACTGGTACTGGGCGCGGTTTTTACCGTTGCATCATGTCGCACCGGTGTAAACCATAAAATCGGTGAAGTTCATGACGGCGCTGCAACCAG	Chromosome	19	41	1958519	1958497	2.4e-05	Chromosome	41	90	3473416	3473367	2.3e-20
220516_1	GACTGTTAATACGTATGTCACTGGTTCGAGTCAAGTCAGAGGAAACAGGGAGTGTTATAACGGTTTATTAGTCTGGAGACG	Chromosome	1	43	2059880	2059922	3.4e-13	Chromosome	44	81	3664890	3664927	9.4e-14
221888_1	GAGACAATTGCAGCGATCTTTTCTTTTAGCAGAAGACGTTTGGGTGTTCACTT	Chromosome	2	27	4376563	4376588	1.1e-05	Chromosome	32	51	3378703	3378684	0.00051
221931_1	GAGACACCATCCCTGTCTTCCCCCACATGACTAAGGGGTGTTGTAAGGGGATGGCTGGCCTGATAG	Chromosome	2	29	4106343	4106370	2.6e-08	Chromosome	32	65	461351	461384	1.2e-11
221935_1	GAGACACCATCCCTGTCTTCCCCCACATGATTAAGGGGTGTCGTAAGGGGATGGCTGGCCTAATAG	Chromosome	2	29	4106343	4106370	2.6e-08	Chromosome	30	65	461349	461384	2e-09
221939_1	GAGACACCATCCCTGTCTTCCCCCACATGATTAAGGGGTGTTGTAAGGGGATGGCTTGCCTGATAG	Chromosome	2	29	4106343	4106370	2.6e-08	Chromosome	30	65	461349	461384	4.2e-11
221937_1	GAGACACCATCCCTGTCTTCCCCCACATGATTAAGGGGTGTTGTAAGGGGATGGATAGCCTGATAG	Chromosome	2	29	4106343	4106370	2.6e-08	Chromosome	30	65	461349	461384	2e-09
221938_1	GAGACACCATCCCTGTCTTCCCCCACATGATTAAGGGGTGTTGTAAGGGGATGGCTGGTCTGATAG	Chromosome	2	29	4106343	4106370	2.6e-08	Chromosome	30	65	461349	461384	4.2e-11
222283_1	GAGACGTGGGCGTGGATAACGTACTTCACGTAATCGGATTTGGCTAAATATTTTAGCCGCGCCAGTCAGTA	Chromosome	2	21	4245805	4245786	0.00079	Chromosome	22	71	4049939	4049988	3.6e-17
223076_1	GAGATAAAAAGAGACCGAACACGTGATTGGACATTGCCGAAATCAGGCTATCACGCACTAGTTGACGG	Chromosome	2	23	1923100	1923121	5.8e-05	Chromosome	23	67	468144	468188	4.4e-11
225325_1	GAGGAGATAACAATGAAAATTTTCCCAACAGTGGAGGAGATAACAATGAACATTTTCCG	Chromosome	2	25	4439576	4439599	3.6e-06	Chromosome	29	46	878706	878689	0.0078
225322_1	GAGGAGATAACAATGAAAATTTTCCCAACAGTGGAGGAGATAACAAAGAAAATTTTCCG	Chromosome	2	25	4439576	4439599	3.6e-06	Chromosome	29	47	878706	878688	0.0022
226186_1	GAGGTAATTTCAATGCGTTAAAAGAAAGCTGGCAATCCCATAATTTCCATGCATTAAAAGAAAGCCGGACAACCC	Chromosome	2	41	3657967	3658006	3e-13	Chromosome	46	63	2787574	2787591	0.011
227746_1	GAGTGTTCCGGTGACAGCGAAAACAGGCTGAAAAACATAACCCAAACAATGCGAGCTGTACCAGGAACCAC	Chromosome	2	22	1030539	1030559	0.00022	Chromosome	27	71	2167114	2167158	1e-12
229794_1	GATACACCATCCCTGTCTTCCCCCACATGATTAAGGGGTGTTGTAAGGGGATGGCTGGCCTGATAG	Chromosome	4	29	4106345	4106370	3.3e-07	Chromosome	30	65	461349	461384	9.1e-13
230229_1	GATAGACACCATCCCTGTCTTCCCCCACATGAGGTTCAGGGACGTCATCACGGGCAGGGATGCCCACACTG	Chromosome	2	31	4106341	4106370	2.2e-09	Chromosome	32	70	4543671	4543709	4.7e-11
233228_1	GATCCCTGTCTTCCCCCACATGCCTCAATAGTTGGGCCGATTGCGGCACCGCACAGGCGTAATACTCAGCC	Chromosome	2	23	4106350	4106371	6.1e-05	Chromosome	27	70	4439532	4439575	1.7e-15
233475_1	GATCCCTGTCTTCCCCCACATGTGTACTATCGTTCAGACCTTTTACTTAACTTG	Chromosome	2	22	4106350	4106370	0.00015	Chromosome	23	51	4049918	4049946	0.00052
234889_1	GATCGTACTTCCTTGCATATTGAACAGGCCGGATTCTCTGGCGAAACCCACCTTAAAGTGGGTTTTGTTAG	Chromosome	2	33	3656390	3656359	1.7e-10	Chromosome	33	70	4190360	4190323	3.6e-12
238329_1	GATCTGGAAAGGTGTACATGGCTTCACTTTTACCCATTTAGGGCTAATTTAATACTACACACAGCAGTGCAG	Chromosome	2	27	817028	817053	3.7e-07	Chromosome	28	71	1103320	1103277	8e-14
238413_1	GATCTGGCTGCAGGTTGAACGGCTGCTACAGTGGATCTGGCAGCAGGTTGAACGGCTGC	Chromosome	5	26	1708380	1708359	4.7e-05	Chromosome	29	52	4517579	4517556	0.0078
239224_1	GATCTTCGATCACGCGCTGAAAAACATAACCCCTCAAGTTCCGACCTGCACGAA	Chromosome	15	32	2167113	2167130	0.0068	Chromosome	36	54	4211994	4212012	0.0019
240645_1	GATGAGCTTACTCAACGTCCCTGCGAGACAGTGGATGAGCTTACTGAACGTCCCTGCGG	Chromosome	2	25	4449652	4449629	3.6e-06	Chromosome	30	50	3430626	3430606	0.0078
241905_1	GATGGCGCTTTATCCTGACGTACAGTGGATGGCGCTTTATCCAGACG	Chromosome	2	20	739418	739436	0.0015	Chromosome	24	41	3118408	3118425	0.0053
241906_1	GATGGCGCTTTATCCTGACGTACAGTGGATGGCGCTTTATCCCGACG	Chromosome	2	20	739418	739436	0.0015	Chromosome	24	41	3118408	3118425	0.0053
242352_1	GATGTATCCGCTCACTTGCTTTTGGAGAAGCTGATTATATCGTGGATGTATCCGCTCACTTGCTTTTGGAGAAGCTGATTATATCGTG	Chromosome	2	43	2514864	2514905	6.3e-16	Chromosome	46	87	15978	16019	6.3e-16
242347_1	GATGTATCCGCTCACTTGCTTTTGGAGAAGCTGATTATATAGTGGATGTATCCGCTCACTTGCTTTTGGAGAAGCTGATTATATCGTG	Chromosome	2	43	15978	16019	2.9e-14	Chromosome	46	87	608598	608639	6.3e-16
243022_1	GATTAAGCAGTAAGCCGGTCATAAAAACAGTGGGTTAAGCAGTAAGCCGGTCATAACAC	Chromosome	2	33	3946823	3946854	2.8e-07	Chromosome	35	59	228880	228904	4.7e-05
243037_1	GATTAAGCAGTAAGCCGGTCATAAAAGTGGATTAAGCAGTAAGCCGGTAAAAAAAC	Chromosome	2	26	228879	228903	9.2e-07	Chromosome	31	56	3946823	3946848	0.00056
243693_1	GATTACGTGACGAAGCGCGCGGCAAAGTGGCATAACGGGCTCCGGGCGGTACGGCCAGAGCTGTCTTTCACCTGG	Chromosome	2	30	1888103	1888075	8.5e-09	Chromosome	34	75	3201451	3201410	1.1e-12
243886_1	GATTAGCCTGGTCGTGATTAGCATCGTTATCAGTGCAGGAAAC	Chromosome	1	22	3950342	3950363	2.7e-05	Chromosome	24	42	1622911	1622893	0.0013
246415_1	GATTGATAGGTGAAGTCAACTTCGGGTTGAGCAAACTACCCTTTGGTATCTTCAGTGT	Chromosome	2	33	2976376	2976345	1.3e-10	Chromosome	34	57	638758	638735	3.5e-06
246742_1	GATTGCCGAAGCCATGACGGGGGCGCTGGCCTTCTCGCCAGCGTCGCCCCG	Chromosome	4	30	3818909	3818935	6.1e-08	Chromosome	30	50	2947763	2947783	0.00013
247006_1	GATTGGTGCTGTGGCCATGCGTTTTGGTAATCGCTGGTTTATTTGATGTAGTGATTTTGCACGCC	Chromosome	2	33	3380236	3380267	1.5e-10	Chromosome	33	64	1517112	1517081	1.5e-10
247660_1	GATTTATTACCGTCATTCATTTCTGAATGTCTCTCTTGCCGGGTATCTGCCCGGCTATTTG	Chromosome	2	32	2313102	2313132	4.9e-10	Chromosome	30	60	604769	604739	2.3e-08
250150_1	GCAAGAGCCATTTCCCTGGACCGAATACAGGGATGTTTACCAGGTCAGGTCCGGAAGGAAGCAGCCAAGGCAGATGACGCG	Chromosome	2	31	1923154	1923125	2.6e-09	Chromosome	34	81	476481	476528	2.6e-19
252447_1	GCATCCCTGTCTTCCCCCACATGTCTTACTTGTATAAGATTTGCGAAGGATGTCGAAGCATGGAAAAGGG	Chromosome	2	23	4106349	4106370	6e-05	Chromosome	24	70	922626	922580	7.6e-19
253024_1	GCCAACACCATTGGTTCTTCCGAGACCTGTATGCTCGGCGGGGCCAACACCATTGGTTCTTCCGAGACCTGTATGCTCGGCGGGATGGCGG	Chromosome	2	42	3667219	3667179	1.1e-13	Chromosome	44	90	1571684	1571638	5.1e-17
253023_1	GCCAACACCATTGGTTCTTACGAGGCCTGTATGCTCGGCGGGGCCAACACCATTGGTTCTTACGAGGCCTGTATGCTCGGCGGGATGGCGG	Chromosome	2	42	1571684	1571644	1.1e-13	Chromosome	44	90	3667219	3667173	5.1e-17
253022_1	GCCAACACCATTGGCTCTTCCGAGGCCTGTATGCTCGGCGGGGCCAACACCATTGGCTCTTCCGAGGCCTGTATGCTCGGCGGGATGGCGG	Chromosome	2	42	1571684	1571644	1.1e-13	Chromosome	44	90	3667219	3667173	5.1e-17
253031_1	GCCAACACCATTGGTTCTTCCGAGGCCTGTATGCTCGGCGGGCCAACACCATTGGTTCTTCCGAGACCTGTATGCTCGGCGGGATGGCGG	Chromosome	2	42	1571684	1571644	2.3e-15	Chromosome	43	89	3667219	3667173	5e-17
253036_1	GCCAACACCATTGGTTCTTCCGAGGCCTGTATGCTCGGCGGGGCCAACACCATTGGTTCTTCCGAGGCCTTTATGCTCGGCGGGATGGCGG	Chromosome	2	42	1571684	1571644	2.4e-15	Chromosome	44	90	3667219	3667173	5.1e-17
253033_1	GCCAACACCATTGGTTCTTCCGAGGCCTGTATGCTCGGCGGGGCCAACACCATTGGTTCTTCCGAGGCCTCTATGCTCGGCGGGATGGCGG	Chromosome	2	42	1571684	1571644	2.4e-15	Chromosome	44	90	3667219	3667173	5.1e-17
253025_1	GCCAACACCATTGGTTCTTCCGAGGCCTGTATCCTCGGCGGGGCCAACACCATTGGTTCTTCCGAGGCCTGTATGCTCGGCGGGATGGCGG	Chromosome	2	42	1571684	1571644	1.1e-13	Chromosome	44	90	3667219	3667173	1.1e-18
253037_1	GCCAACACCATTGGTTCTTCCGAGGCCTGTATGCTTGGCGGGGCCAACACCATTGGTTCTTCCGAGGCCTGTATGCTTGGCGGGATGGCGG	Chromosome	2	42	3667219	3667179	1.1e-13	Chromosome	44	90	1571684	1571638	5.1e-17
253032_1	GCCAACACCATTGGTTCTTCCGAGGCCTGTATGCTCGGCGGGGCCAACAACATTGGTTCTTCCGAGGCCTGTATGCTCGGCGGGATGGCGG	Chromosome	2	42	1571684	1571644	2.4e-15	Chromosome	44	90	3667219	3667173	5.1e-17
253028_1	GCCAACACCATTGGTTCTTCCGAGGCCTGTATGCTCGGCGGCCAACACCATTGGTTCTTCCGAGGCCTGTATGCTCGGCGGGATGGCGG	Chromosome	2	41	1571684	1571645	8.3e-15	Chromosome	42	88	3667219	3667173	1.1e-18
253026_1	GCCAACACCATTGGTTCTTCCGAGGCCTGTATGCTCGGCCAACACCATTGGTTCTTCCGAGGCCTGTATGCTCGGCGGGATGGCGG	Chromosome	2	39	1571684	1571647	1e-13	Chromosome	39	85	3667219	3667173	1e-18
253035_1	GCCAACACCATTGGTTCTTCCGAGGCCTGTATGCTCGGCGGGGCCAACACCATTGGTTCTTCCGAGGCCTGTATGCTCGGCGGTATGGCGG	Chromosome	2	42	1571684	1571644	2.4e-15	Chromosome	44	90	3667219	3667173	5.1e-17
255389_1	GCGATCTGCTTGCAATGGTTGAACACTGGTGACGGCCTGAGTCCGGAGGCGAAGGAAAT	Chromosome	2	23	1147144	1147165	4.7e-05	Chromosome	24	56	2796616	2796584	1.7e-09
255405_1	GCGATGACAGCGCCGACTGCCTGATTACAGTGACGATGCCAGCGCCGACTGCCTGATTC	Chromosome	1	27	514333	514359	3.6e-06	Chromosome	32	49	2113922	2113905	0.0078
255440_1	GCGATTCTTTATTGGTAATGGCACACTGGCGCTTCTTTATTGGTAATGG	Chromosome	2	20	1300925	1300943	0.0016	Chromosome	23	40	2655794	2655811	0.0057
257747_1	GCTATCAGCAGTGTAAAAGGAAACATAACCCATAAAAAGCTC	Chromosome	3	23	4250447	4250467	0.0043	Chromosome	21	41	2167120	2167140	0.0043
257803_1	GCTATCAGCAGTGTAAAAGGATGTCACTGGTTCGAGACCAGTAAGATAAGACAG	Chromosome	3	20	4250447	4250464	0.0068	Chromosome	21	46	2044592	2044617	0.00052
259516_1	GCTGAAAAAGAACGTCAAACCGGTGCACCAGACGTGATAAAATGCTAGCTGTACCAGC	Chromosome	2	32	2889724	2889694	4.5e-10	Chromosome	37	57	2167131	2167151	0.00016
259637_1	GCTGACACCATTGGTTCTTCCGAGGCCTGTATGCTCGGCGGGGCCAACACCATTGGTTCTTCCGAGGCCTGTATGCTCGGCGGGATGGCGG	Chromosome	5	42	1571681	1571644	1.1e-13	Chromosome	44	90	3667219	3667173	1.1e-18
260392_1	GCTGTCCAGTCACAAAAATCAGTGCTCTGACAGTACAAAACGTTTCAGCGCGATCTTGTCTTTAACC	Chromosome	9	36	1517070	1517043	5.6e-05	Chromosome	38	67	2263593	2263564	2e-09
260452_1	GCTGTCGCCTTAAAGCGTCATTCCACTAAGGCATTTGATGCTTAAATTGAAGAGTTTGATCATGGCTCACACG	Chromosome	2	41	605411	605372	6.3e-15	Chromosome	42	69	3941806	3941833	3e-08
260761_1	GCTTACTCCCGAGCGGCTTTTTATACTGCTGGTGCTCACCAATTGGCTGTTATCAAAGCAGTATTTAGCG	Chromosome	1	24	4218940	4218963	4.7e-06	Chromosome	26	63	4180741	4180778	1.7e-05
261830_1	GCTTGCCATAGACACCATCCCTGTCTTCCCCCACATGCAGACTATAGCTCAGCTGGGAGAGCGCCTGCTTTGCGCGCAGGAGGG	Chromosome	2	38	4106335	4106371	3.6e-13	Chromosome	42	83	225504	225545	2.7e-14
263818_1	GGAACTTCTATGCGGGCGAAACTTCTTCTGTCCATAGTGATTAATGTAGCACCGCCACAGCAGGTGGTGCCCTGG	Chromosome	2	26	585641	585617	6.6e-05	Chromosome	27	56	2942852	2942881	2.4e-09
263981_1	GGAAGGATAAGCTGCATTTATCAGTACTACAGTGGGAAGGATAAGCTGCATTTATCAGTAC	Chromosome	16	33	1517159	1517176	0.0082	Chromosome	36	59	4439718	4439741	0.00018
265099_1	GGAGGTATTGATAGGTGAAGTCAACTTCGGGTTGAGCAGAGAATATCGAGTCTCCTTGTTTCGACTTAAGCTGGAAATTGC	Chromosome	2	38	2976381	2976345	3.4e-13	Chromosome	42	80	3658041	3658003	1.2e-12
265203_1	GGAGTCTCGTTTCCCGCTCCAATACAGTTGGAGTCTCGTTTCCCGCTCCAG	Chromosome	2	22	4392528	4392548	0.00013	Chromosome	26	51	1992066	1992041	1e-05
265311_1	GGATAAGGGTGAGGTCGGTGGTTCAAGTCCACTCAGGCCTAGTGGGATAAGGGTGAGGTCGGTGGTTCAAGTCCACTAAGGCCTACCAG	Chromosome	2	41	4037175	4037214	8.3e-15	Chromosome	46	88	3427118	3427076	8.3e-15
269902_1	GGGATCCCTGTCTTCCCCCACATGGCACAGGCTGTTCACAAATTCATCCGTGACCACATTGTTAAAGCAGACGA	Chromosome	4	24	4106350	4106370	0.00023	Chromosome	24	67	4110962	4110919	8.3e-14
270089_1	GGGCGATCAGCTCAGCTGGGAGAGCACCTCCCTGACAGTTGGGCGATCAGCTCAGCTGGGAGAGCACCTCCCG	Chromosome	1	37	780765	780801	3e-08	Chromosome	40	72	2521050	2521082	1.1e-07
270732_1	GGGTGATCAGCCCAGCTGGGAGAGCACCTCCCTGACAGTTGGGTGATCAGCCCAGCTGGGAGAGCACCTCCCG	Chromosome	1	37	780765	780801	3e-08	Chromosome	40	72	2521172	2521204	1.1e-07
270734_1	GGGTGATCAGCTCAACTGGGAGAGCACCTCCCTGACAGTTGGGTGATCAGCTCAACTGGGAGAGCACCTCCCG	Chromosome	1	37	780765	780801	3e-08	Chromosome	40	72	2521050	2521082	1.1e-07
270740_1	GGGTGATCAGCTCAGCTGGGAGAGCACCCCCCTGACAGTTGGGTGATCAGCTCAGCTGGGAGAGCACCCCCCG	Chromosome	1	37	780765	780801	3e-08	Chromosome	40	72	2521050	2521082	1.1e-07
270749_1	GGGTGATCAGCTCAGCTGGGAGAGCACCTCCCTGACAGTTGGGTGATCAGCTAAGCTGGGAGAGCACCTCCCG	Chromosome	1	37	781068	781104	6.3e-10	Chromosome	40	72	2521172	2521204	1.1e-07
270751_1	GGGTGATCAGCTCAGCTGGGAGAGCACCTCCCTGACAGTTGGGTGATCAGCTCAACTGGGAGAGCACCTCCCG	Chromosome	1	37	781068	781104	6.3e-10	Chromosome	40	72	2521172	2521204	1.1e-07
270755_1	GGGTGATCAGCTCAGCTGGGAGAGCACCTCCCTGACAGTTGGGTGATCAGCTCAGCTGGGAGAGCAACTCCCG	Chromosome	1	37	781068	781104	6.3e-10	Chromosome	40	72	2521172	2521204	1.1e-07
270756_1	GGGTGATCAGCTCAGCTGGGAGAGCACCTCCCTGACAGTTGGGTGATCAGCTCAGCTGGGAGAGCACCCACCG	Chromosome	1	37	780765	780801	6.3e-10	Chromosome	40	68	2521172	2521200	3.8e-07
270757_1	GGGTGATCAGCTCAGCTGGGAGAGCACCTCCCTGACAGTTGGGTGATCAGCTCAGCTGGGAGAGCACCCCCCG	Chromosome	1	37	780765	780801	6.3e-10	Chromosome	40	72	2521050	2521082	1.1e-07
270765_1	GGGTGATCAGCTCGGCTGGGAGAGCACCTCCCTGACAGTTGGGTGATCAGCTCGGCTGGGAGAGCACCTCCCG	Chromosome	1	37	781068	781104	3e-08	Chromosome	40	72	2521050	2521082	1.1e-07
270767_1	GGGTGATCGGCTCAGCTGGGAGAGCACCTCCCTGACAGTTGGGTGATCAGCTCAGCTGGGAGAGCACCTCCCG	Chromosome	1	37	781068	781104	3e-08	Chromosome	40	72	2521050	2521082	2.3e-09
271759_1	GGTAGAACGGCGGACTGTTAATCCCACAGTGGGTAGAACGGCGGACTGTTAATCC	Chromosome	1	24	2044566	2044589	3.2e-06	Chromosome	27	55	2059863	2059891	2.5e-07
271773_1	GGTAGAACGGCGGACTGTTAATCTCCACAGTGGGTAGAACGGCGGACTGTTAATCTG	Chromosome	1	23	2044566	2044588	1.2e-05	Chromosome	28	55	2059863	2059890	9.5e-07
271780_1	GGTAGACCGGCGGACTGTTAATCCCCACAGTGGGTAGAACGGCGGACTGTTAATCCG	Chromosome	1	24	2058085	2058062	0.00016	Chromosome	28	57	2059863	2059892	7.3e-08
271769_1	GGTAGAACGGCGGACTGTTAATCCGTATGTCACTCAACAGTGGGTAGAACGGCGGACTGTTAATCCGTATGTCACTAGTTCGC	Chromosome	1	34	2059868	2059901	1.6e-11	Chromosome	38	82	2058090	2058046	2.7e-14
271768_1	GGTAGAACGGCGGACTGTTAATCCGTATGTCACAACAGTGGGTAGAACGGCGGACTGTTAATCCGTATGTCACTGGTTCGC	Chromosome	1	33	2058085	2058053	5.7e-11	Chromosome	36	80	2059863	2059907	5.6e-16
271772_1	GGTAGAACGGCGGACTGTTAATCCGTATGTCACTGTCAACAGTGGGTAGAACGGCGGACTGTTAATCCGTATGTCACTGGTTCGC	Chromosome	1	35	2059868	2059902	4.7e-12	Chromosome	40	84	2058090	2058046	6e-16
271771_1	GGTAGAACGGCGGACTGTTAATCCGTATGTCACTGTCAACAGTGGGTAGAACGGCGGAATGTTAATCCGTATGTCACTGGTTCGC	Chromosome	1	35	2058085	2058051	4.7e-12	Chromosome	40	84	2044561	2044605	2.8e-14
271770_1	GGTAGAACGGCGGACTGTTAATCCGTATGTCACTGGCAAGAGTGGGTAGAACGGCGGACTGTTAATCCGTATGTCACTGGTTCGC	Chromosome	1	36	2058085	2058050	1.3e-12	Chromosome	41	84	2062273	2062316	2.2e-15
271873_1	GGTAGTACGGCGGACTGTTAATCCCCACAGTGGGTAGTACGGCGGACTGTTAATCCG	Chromosome	1	24	2044566	2044589	0.00016	Chromosome	28	57	2059863	2059892	3.4e-06
272119_1	GGTCACGCAGGCGGTCGCGGGTTCGAGTCCCGTCCGTTCCGGGGTCACGCAGGCGGTCGCGGGTTCGAGTCCCGTCCGTTCCGCCACCCTA	Chromosome	2	41	228962	229001	4e-13	Chromosome	44	91	3946906	3946953	1.4e-17
272123_1	GGTCACGCAGGGGGTCGCGGGTTCGAGTCCCGACCGTTCGGGTCACGCAGGGGGTCGCGGGTTCGAGTCCCGTCCGTTCCGCCACCCTA	Chromosome	2	39	236965	237002	5e-12	Chromosome	42	89	3946906	3946953	2.9e-19
272120_1	GGTCACGCAGGGAGTCGCGGGTTCGAGTCCCGTCCGTTCCGGGGTCACGCAGGGAGTCGCGGGTTCGAGTCCCGTCCGTTCCGCCACCCTA	Chromosome	2	41	228962	229001	4e-13	Chromosome	44	91	3946906	3946953	1.4e-17
272124_1	GGTCACGCAGGGGGTCGCGGGTTCGAGTCCCGTCCGTTCCAGGGTCACGCAGGGGGTCGCGGGTTCGAGTCCCGTCCGTTCCACCACCCTA	Chromosome	2	40	236965	237003	3.1e-14	Chromosome	44	91	3946906	3946953	1.4e-17
272133_1	GGTCACGCAGGGGGTCGCGGGTTCGAGTCCCGTCCGTTCCGGGGTCACCCAGGGGGTCGCGGGTTCGAGTCCCGTCCGTTCCGCCACCCTG	Chromosome	2	41	236965	237004	8.5e-15	Chromosome	44	90	3946906	3946952	5.1e-17
272136_1	GGTCACGCAGGGGGTCGCGGGTTCGAGTCCCGTCCGTTCCGGGGTCACGCAGGGGGTCGCGGGTTCGAGACCAGACCGTTCCGCCACCCTA	Chromosome	2	41	228962	229001	8.5e-15	Chromosome	44	91	3946906	3946953	3.1e-14
272135_1	GGTCACGCAGGGGGTCGCGGGTTCGAGTCCCGTCCGTTCCGGGGTCACGCAGGGGGTCGCGGGTTCGAATCCCGTCCGTTCCGCCACCCTA	Chromosome	2	41	228962	229001	8.5e-15	Chromosome	44	91	3946906	3946953	1.4e-17
272138_1	GGTCACGCAGGGGGTCGCGGGTTCGAGTCCCGTCCGTTCCGGGGTCACGCAGGGGGTCGCGGGTTCGAGTCCCGTCAGTTCCGCCAACCTA	Chromosome	2	41	236965	237004	8.5e-15	Chromosome	44	91	3946906	3946953	6.6e-16
272137_1	GGTCACGCAGGGGGTCGCGGGTTCGAGTCCCGTCCGTTCCGGGGTCACGCAGGGGGTCGCGGGTTCGAGTCCCGTACGTTCCGCCACCCTA	Chromosome	2	41	228962	229001	8.5e-15	Chromosome	44	91	3946906	3946953	1.4e-17
272140_1	GGTCACGCAGGGGGTCGCGGGTTCGAGTCCCGTCCGTTCCGGGGTCACGCAGGGGGTCGCGGGTTCGAGTCCCGTCCGTTCCGCAACCCTA	Chromosome	2	41	228962	229001	8.5e-15	Chromosome	44	91	3946906	3946953	1.4e-17
272145_1	GGTCACGCAGGGGGTCGCGGGTTCGAGTCCCGTCCGTTGCGGGGTCACGCAGGGGGTCGAGGGTTCGAGTCCCGTCCGTTCCGCCACCCTA	Chromosome	2	41	236965	237004	4e-13	Chromosome	44	91	3946906	3946953	1.4e-17
272142_1	GGTCACGCAGGGGGTCGCGGGTTCGAGTCCCGTCCGTTCCGGGGTCACGCAGGGGGTCGCGGGTTCGAGTCCCGTCCGTTCTGCCACCCTA	Chromosome	2	41	228962	229001	8.5e-15	Chromosome	44	91	3946906	3946953	1.4e-17
272146_1	GGTCACGCAGGGGGTCGCGGGTTCGAGTCCCGTCCGTTGGGTCACGCAGGGGGTCGCGGGTTCGAGTCCCGTCCGTTCCGCCACCCTA	Chromosome	2	38	236965	237001	3.8e-13	Chromosome	41	88	3946906	3946953	2.9e-19
272843_1	GGTGGGGTTCCCGAGCGGGCACAGTGGGTGGGGTTCCCGAGCGGG	Chromosome	1	24	4175472	4175495	0.0049	Chromosome	27	44	1287328	1287311	0.0049
273148_1	GGTTAATGAGGCGAACCGGGGGAACTGGAACCTTTATTCCCCTGGTATGTG	Chromosome	1	31	4210210	4210240	1.7e-08	Chromosome	32	51	3658992	3659011	0.00048
273149_1	GGTTAATGAGGCGAACCTGGGGAACTGAAACCTTTATTCCCCTGGTATGTG	Chromosome	1	31	3943871	3943901	1.7e-08	Chromosome	32	51	3658992	3659011	0.00048
273828_1	GGTTGACGTTTTACACGTTTTTCCAGCAGGTCCCAAAGTCATGGTTAAGTGGG	Chromosome	2	28	1291724	1291698	6.5e-08	Chromosome	28	53	2728184	2728159	2.3e-07
273848_1	GGTTGATGAGGCGAACCGGGGGAACTGAAACCTTTATTCCCCTGGTATGTG	Chromosome	1	31	3426616	3426586	1.7e-08	Chromosome	32	51	3658992	3659011	0.00048
275964_1	GTAATCCGTATGTCACTGGTTCGAGTCCAGTCAGAGGAGACAGTGGTAATCCGGATGTCACTGGTTCGAGTCCAGTCATAGGAGCCAG	Chromosome	2	42	2044584	2044624	1.1e-13	Chromosome	44	87	2058070	2058027	4.9e-12
276189_1	GTACAGTGCCAAGCGTATGGAAGCTGCAGGCAAACCAAGCGTATGGAAGCTGCAGGCAAACCAACGG	Chromosome	10	38	1571620	1571592	7.3e-09	Chromosome	36	67	3667155	3667124	1.6e-10
276777_1	GTAGAACGGCGGACTGTTAATCCGTATGTCACAGTGGTAGAACGGCGGATTGTTAATCCGTATGTCACTC	Chromosome	1	32	2058084	2058053	1.7e-10	Chromosome	36	69	2062277	2062310	6e-10
276775_1	GTAGAACGGCGGACTGTTAATCCGTATGTCACAGTGGTAGAACGGCGGACTGTTAATCCGTATATCACTC	Chromosome	1	32	2058084	2058053	1.7e-10	Chromosome	36	69	2044566	2044599	6e-10
276776_1	GTAGAACGGCGGACTGTTAATCCGTATGTCACAGTGGTAGAACGGCGGACTGTTAATCCGTATGTCACTA	Chromosome	1	32	2062278	2062309	1.7e-10	Chromosome	36	69	2059868	2059901	1.3e-11
276799_1	GTAGAACGGCGGACTGTTAATCCGTATGTCACTGTGGTAGAACAGCGGACTGTTAATCCGTATGTCACTC	Chromosome	1	34	2062278	2062311	1.3e-11	Chromosome	36	69	2059868	2059901	6e-10
276801_1	GTAGAACGGCGGACTGTTAATCCGTATGTCACTGTTGTAGAACGGCGGACTGTTAATCCGTATGTCACTC	Chromosome	1	34	2062278	2062311	1.3e-11	Chromosome	37	69	2058084	2058052	4.6e-11
276808_1	GTAGAACGGCGGTCTGTTAATCCGTATGTCACAGTGGTAGAACGGCGGTCTGTTAATCCGTATGTCACTC	Chromosome	1	32	2062278	2062309	7.7e-09	Chromosome	36	69	2044566	2044599	6e-10
278074_1	GTCACGTGACGAAGCGCGCGGCAAATTGTGACAATCAGGTACCGGAGTTACAGGATGCGGGCATCGTAAAATGGG	Chromosome	4	25	1888100	1888079	6.6e-05	Chromosome	29	74	4175645	4175690	6.6e-10
278482_1	GTCCCCCTGGTATGTGTATCCATTATCGGCGCACTGTTAAGCC	Chromosome	4	22	3658999	3659017	0.0013	Chromosome	23	42	2800441	2800460	0.00035
278483_1	GTCCCCCTGGTATGTGTATCCATTATCGGCGCACTGTTAAGGACAGTGGTCCACCTGGTATGTGTATCCATTATCGGCGCACTATTAAGCC	Chromosome	4	22	3658999	3659017	0.004	Chromosome	23	41	2800441	2800459	0.004
278486_1	GTCCCCCTGGTATGTGTATCCATTATCGGCGCACTGTTAAGGACAGTGGTCCCCTTGGTATGTGTATCCATTATCGGCGAACTGTTAAGCC	Chromosome	4	22	3658999	3659017	0.004	Chromosome	23	41	2800441	2800459	0.004
278481_1	GTCCCCCTGGTATGTGTATCCATTATCGGCGCACTGTTAAGCAGTGGTCCCCCTGGTATGTGTATCCATTATCGGCGCACTATTAAGCC	Chromosome	4	22	3658999	3659017	0.0039	Chromosome	23	43	2800441	2800461	0.0003
278492_1	GTCCCCCTGGTATGTGTATCCATTATCGGCGCACTGTTGACAGTGGTCCCCCTGGTATGTGTATCCATTATCGGCGCACTGTTAAGCC	Chromosome	49	67	3658999	3659017	0.0038	Chromosome	68	87	2800441	2800460	0.0011
278751_1	GTCCGGCGCGGCATAAGTGAGAATTACCAGCTAGGATGTTGGTAATCTGCAGTTCCGCGCCCAGCC	Chromosome	1	35	3839152	3839186	1.5e-10	Chromosome	36	65	3106399	3106370	2e-09
280506_1	GTGACATAAGAACGGTTACACTCTCCCATCAATCGTAATGGGTCTGAGGGCGAGCCGCAAGGCGAGTAATCCT	Chromosome	4	49	3453358	3453313	1.4e-16	Chromosome	47	73	2818378	2818352	1.1e-07
281546_1	GTGCTGCCGATTGTCATCATTATTACCGTGCCAACAGGAAGTGTTATAACGGTTTATTAGTCTGGAGACGGA	Chromosome	2	24	2174229	2174207	1.7e-05	Chromosome	26	71	3664883	3664928	1.3e-16
284202_1	GTTCACGCAGGGGGTCGCGGGTTCGAGTCCCGTCCGTTCCGGGTTCACGCAGGGGGTCGCGGGTTCGAGTCCCGTCCGTTCCGCCACCCTA	Chromosome	3	41	236966	237004	3.1e-14	Chromosome	45	91	3946907	3946953	1.1e-18
284310_1	GTTCAGTCGGTAGAACGGCGGACTGTCAATCCTACAGTGGTTCAGTCGGTAGAACGGCGGACTGTCAATCG	Chromosome	1	32	2059860	2059891	7.9e-09	Chromosome	37	70	2058096	2058063	2.8e-08
284315_1	GTTCAGTCGGTAGAACGGCGGACTGTTAATCCTACAGTAGTTCAGTCGGTAGAACGGCGGACTGTTAATCG	Chromosome	1	32	2062269	2062300	1.7e-10	Chromosome	37	70	2044555	2044588	1.3e-11
284329_1	GTTCAGTCGGTAGAACGGCGGCCTGTTAATCCTACAGTGGTTCAGTCGGTAGAACGGCGGACTGTTAATCG	Chromosome	1	32	2062269	2062300	7.9e-09	Chromosome	37	70	2058096	2058063	6.1e-10
284331_1	GTTCAGTCGGTAGAACGGCGGGCTGTTAATCCTACAGTGGTTCAGTCGGTAGAACGGCGGGCTGTTAATCG	Chromosome	1	32	2044558	2044589	7.9e-09	Chromosome	37	70	2058096	2058063	2.8e-08
284330_1	GTTCAGTCGGTAGAACGGCGGCCTGTTAATCCTACAGTGGTTCAGTCGGTAGAACGGCGGCCTGTTAATCG	Chromosome	1	32	2059860	2059891	7.9e-09	Chromosome	37	70	2058096	2058063	2.8e-08
284332_1	GTTCAGTCGGTAGAGCGGCGGACTGTTAATCCTACAGTGGTTCAGTCGGTAGAACGGCGGACTGTTAATCG	Chromosome	1	32	2059860	2059891	7.9e-09	Chromosome	37	70	2058096	2058063	6.1e-10
285341_1	GTTCCTGTGTGTAGTCTTTGCCCATCTCCCATGGCAGAACCGCCGGGGCATGATGGGCGAGGCT	Chromosome	5	31	1770435	1770461	8.8e-08	Chromosome	31	63	670772	670740	4.1e-11
286680_1	GTTGCTCTGTGTAGTCTTTGCCCATCTCCCATGGCAGAACCGCCGGGGCATGATGGGCGAGGCT	Chromosome	2	31	1770432	1770461	8.8e-08	Chromosome	31	63	670772	670740	4.1e-11
286696_1	GTTGCTGCCACTGGGGGGTGACGTCATCTCTGTCTTCCCCCGTGGTTGCTGCCACTGGGGGGTGACGTCATCTCTGTCTTCCCCCACATGC	Chromosome	46	71	984184	984209	0.0011	Chromosome	69	91	4106349	4106371	0.0011
286695_1	GTTGCTGCCACTGGGGGCTGACGTCATCTCTGTCTTCCCCCGTGGTTGCTGCCACTGGGGGATGACGTCATCTCTGTCTTCCCCCACATGC	Chromosome	46	71	984184	984209	2.4e-05	Chromosome	69	91	4106349	4106371	0.0011
286723_1	GTTGCTGTGTGTAGCCTTTGCCCATCTCCCATGGCAGAACCGCCGGGGCATGATGGGCGAGGCG	Chromosome	2	31	1770432	1770461	8.8e-08	Chromosome	31	64	670772	670739	1.1e-11
286724_1	GTTGCTGTGTGTAGTCTTTGCCCATCTCCAGGGCTGATTTATTACTACACACAGCAGAG	Chromosome	2	29	1770432	1770459	2.2e-08	Chromosome	30	57	1103308	1103281	2.2e-08
286730_1	GTTGCTGTGTGTAGTCTTTGCCCATCTCCCATGGCAGAACCGCCGGGGCATGATGGCGAGGCT	Chromosome	2	31	1770432	1770461	1.8e-09	Chromosome	31	62	670772	670740	3.1e-07
286726_1	GTTGCTGTGTGTAGTCTTTGCCCATCTCCCATGGCAGAACCAACGGGGCATGATGGGCGAGGCT	Chromosome	2	31	1770432	1770461	1.9e-09	Chromosome	31	63	670772	670740	8.8e-08
286732_1	GTTGCTGTGTGTAGTCTTTGCCCATCTCCCATGGCAGAACCGCCGGGGCATGATGGGCGACGCT	Chromosome	2	31	1770432	1770461	1.9e-09	Chromosome	31	60	670772	670743	1.9e-09
286728_1	GTTGCTGTGTGTAGTCTTTGCCCATCTCCCATGGCAGAACCGACGGGGCATGATGGGCGAGGCT	Chromosome	2	31	1770432	1770461	1.9e-09	Chromosome	31	63	670772	670740	1.9e-09
286731_1	GTTGCTGTGTGTAGTCTTTGCCCATCTCCCATGGCAGAACCGCCGGGGCATGATGGGAGAGGCT	Chromosome	2	31	1770432	1770461	1.9e-09	Chromosome	31	63	670772	670740	1.9e-09
286733_1	GTTGCTGTGTGTAGTCTTTGCCCATCTCCCATGGCAGAACCGCCGGGGCATGATGGGCGAGGAT	Chromosome	2	31	1770432	1770461	1.9e-09	Chromosome	31	62	670772	670741	1.5e-10
286729_1	GTTGCTGTGTGTAGTCTTTGCCCATCTCCCATGGCAGAACCGCCGGGGCATGATGAGCGAGGCT	Chromosome	2	31	1770432	1770461	1.9e-09	Chromosome	31	63	670772	670740	1.9e-09
286735_1	GTTGCTGTGTGTAGTCTTTGCCCATCTCCCATGGCAGAACCGCCGGGGCCTGATGGGCGAGGCT	Chromosome	2	31	1770432	1770461	1.9e-09	Chromosome	31	63	670772	670740	1.9e-09
286736_1	GTTGCTGTGTGTAGTCTTTGCCCATCTCCCATGGGAACCGCCGGGGCATGATGGGCGAGGCT	Chromosome	2	31	1770432	1770461	1.8e-09	Chromosome	35	61	670766	670740	8.4e-08
286734_1	GTTGCTGTGTGTAGTCTTTGCCCATCTCCCATGGCAGAACCGCCGGGGCATGATGGGCGAGGCA	Chromosome	2	31	1770432	1770461	1.9e-09	Chromosome	31	63	670772	670740	4.1e-11
289217_1	GTTTCCCTTGCCATAGACACCATCCCTGTCTTCCCCCACAGCAGAAGGGTTATACGCTGAATGGTCGTACGATTCGTGCGGCGATGGTTG	Chromosome	1	40	4106329	4106368	3.9e-13	Chromosome	41	89	2750187	2750139	8.3e-20
291784_1	GTTTCCTTGCCATAGACACCATCCCTGTCTTCCCCTTTACAGTGGTTTCCTGGCAAAAAACCCCATCCCTGTTTTCCCCACATGC	Chromosome	2	35	4106331	4106364	1.7e-11	Chromosome	40	57	1963286	1963269	0.013
294100_1	GTTTGCTTTAAAATCCGCGAGCAACAGTGGTTTGCTTTAAAATCCGCGAGG	Chromosome	2	23	1800838	1800817	0.0017	Chromosome	27	44	1496618	1496635	0.0062
294464_1	GTTTTAACCAATTGGTCGCAGGTTCGAATCCTGCACGACCCGGTTTTAACCAATTGGTCGCAGGTTCGAATCCTGCACGACCCACCAATCG	Chromosome	2	41	2521285	2521324	4e-13	Chromosome	44	91	780586	780633	1.4e-17
294536_1	GTTTTAATCAATTGGTCGCAGGTTCGAATCCTGCACGACACGGTTTTAATCAATTGGTCGCAGGTTCGAATCCTGCACGACACACCAATCG	Chromosome	2	39	781179	781216	1.1e-13	Chromosome	44	91	780586	780633	1.4e-17
294543_1	GTTTTAATCAATTGGTCGCAGGTTCGAATCCTGCAGGTTTTAATCAATTGGTCGCAGGTTCGAATCCTGCACGACCCACCAATCG	Chromosome	2	35	781179	781212	1.7e-11	Chromosome	38	85	780586	780633	2.8e-19
294538_1	GTTTTAATCAATTGGTCGCAGGTTCGAATCCTGCACGACCCGGTTTTACTCAATTGGTCGCAGGTTCGAATCCTGCACGACCCACCAATCG	Chromosome	2	41	781401	781440	8.5e-15	Chromosome	44	91	780586	780633	1.4e-17
295460_1	GTTTTCCTCGCCATAGACACCATCCCTGTCTTCCCCCACATTCTGTCACACTTGTGACTGTTATTCGGCGCTCCG	Chromosome	1	46	4106329	4106374	6.5e-15	Chromosome	50	74	4242572	4242548	1.4e-06
295447_1	GTTTTCCTCGCCATAGACACCATCCCTGTCTTCCCCCACATTAACAAAAACTGGATCGACAAAGAAGAATATCCGCAATCCGCAGCCAG	Chromosome	1	41	4106329	4106369	1.1e-13	Chromosome	39	88	1571809	1571760	2.3e-20
295492_1	GTTTTCCTCGCCATAGACACCATCCCTGTCTTCCCCCACTTGTCACTAATAGTTGGGCCGATTGTGA	Chromosome	1	42	4106329	4106370	9.3e-13	Chromosome	47	66	4439531	4439550	0.00073
298031_1	GTTTTCCTTGCCATAGACACCATCCCTGTCTTCCCCCACATACACCATGCACCGAAGCTGCGGCAGCG	Chromosome	1	41	4106329	4106369	1.6e-15	Chromosome	41	68	3425643	3425616	1.2e-06
298196_1	GTTTTCCTTGCCATAGACACCATCCCTGTCTTCCCCCACATAGTGGTGGCTATAGCTCAGTTACTAGACCCCTGGAC	Chromosome	1	41	4106329	4106369	1.9e-15	Chromosome	41	76	3982505	3982540	1.1e-07
300614_1	GTTTTCTTTGCCATAGACACCATCCCTGTCTTCCCCCACATCCAAGTCTCAAGAGTGAACACGTAATTCATTACGAAGTTTAATTCTTTGA	Chromosome	1	41	4106329	4106369	1.1e-13	Chromosome	42	91	3428825	3428776	2.3e-20
302416_1	TAAAGTGGTCTGCGGCTGACATTGCTGTCAGCTTTCATCCTACGGATCACTGTAATTAAAATAAATGAAGGC	Chromosome	1	41	3258303	3258263	1.7e-15	Chromosome	44	71	3888694	3888721	2.9e-08
304453_1	TAACCCAGAAATTAACATGGGTGTACTGGCGGGTATCATTAGGCTTCCCAACGTATTGAAAG	Chromosome	2	41	704214	704253	5e-15	Chromosome	42	62	3397376	3397356	0.0084
305439_1	TAACGGTTTATTAGTCTGGAGACGTAATCGGATTTGGCTGAATATTTTAGCCGCCCCAGTCAGTC	Chromosome	1	24	3664904	3664927	4.2e-06	Chromosome	22	64	4049945	4049987	1.1e-16
305870_1	TAACTGGAGGAAGGCGGGGATGACGTCAAGTCATCATTTTCCTTGCCAGACACCATCCCTGTCTTCCCCC	Chromosome	2	37	224940	224975	4.6e-11	Chromosome	37	70	4106330	4106365	1e-07
305875_1	TAACTGGAGGAAGGTGGGGATGACGTCAAGTCATCATTTTCCTTGCCGGACACCATCCCTGTCTTCCCCC	Chromosome	2	37	2729988	2729953	9.9e-13	Chromosome	37	70	4106330	4106365	4.7e-06
305876_1	TAACTGGAGGAAGGTGGGGATGGCGTCAAGTCATCATTTTCCTTGCCAGACACCATCCCTGTCTTCCCCC	Chromosome	2	37	3427593	3427558	4.6e-11	Chromosome	37	70	4106330	4106365	1e-07
307482_1	TAATACAGTGCACTGACGAGGCGCAGCGCTTTTGCGCCTTGTCGCTGCAGA	Chromosome	12	29	1302628	1302645	0.0062	Chromosome	30	48	3401171	3401153	0.0017
309110_1	TAATTCCTCTGACGGGCCAATAGCGATATTGGCCATTTTTTTGACGTACCAGAGAGCTGGGAGGTCATGGCTCCGTCAGCCCGCAGAT	Chromosome	2	42	507245	507287	1.8e-11	Chromosome	46	87	3560544	3560503	0.0003
309669_1	TACAAGGAGGGGGTCGGCGGTTCGATCCCGTCATCACCGTGTACAAGGAGGGGGTCGGCGGTTCGATCCCGTCATCACCCACCAACTG	Chromosome	1	38	780798	780835	1.1e-13	Chromosome	42	87	2520964	2521009	3.8e-18
309665_1	TACAAGGAGGGGGTCGGCGGTTCGATCCCGTCATCACCCACGTGTACAAGGAGGGGGTCGGAGGTTCGATACCGTCATCACCCACCAACTG	Chromosome	1	41	780798	780838	2.4e-15	Chromosome	45	90	2520964	2521009	8.5e-15
309671_1	TACAAGGAGGGGGTCGGCGGTTCGATCCCGTCATCGCCCACGTGTACAAGGAGGGGGTCGGCGGTTCGATCCCGTCATCGCCCACCAACTG	Chromosome	1	41	781101	781141	1.1e-13	Chromosome	45	90	2520964	2521009	1.8e-16
309674_1	TACAAGGAGGGGGTCGGTGGTTCGATCCCGTCATCACCCACGTGTACAAGGAGGGGGTCGGTGGTTCGATCCCGTCATCACCCACCAACTG	Chromosome	1	41	780798	780838	1.1e-13	Chromosome	45	90	2520964	2521009	1.8e-16
310221_1	TACAGTGCACTGACGAGGCGCAGCGCTTTTGCGCCTTGTCGCTGCAGA	Chromosome	9	26	1302628	1302645	0.0055	Chromosome	27	45	3401171	3401153	0.0015
310838_1	TACCATCACTATCCCGGCCATTTCTTCTTAACATATCAACACCCC	Chromosome	2	21	820598	820617	0.00038	Chromosome	18	36	4503916	4503898	0.0014
310939_1	TACCCGACATGGAAGTACCTACACGACGCTCTTACGATCTCAAACAGTGTACCCGACATGGAAGTACCTA	Chromosome	1	21	2413479	2413459	0.01	Chromosome	26	43	211349	211366	0.01
311626_1	TACGATGAAGCGAGTGCGAAATTTCTCGAGTCCAGTCAGAGGAGCC	Chromosome	2	26	193690	193714	3.1e-05	Chromosome	26	46	2062314	2062334	0.00011
312974_1	TACTGAGAGCACAAAGTTTCCCGTGTTCACGAAGGGTAAAGTTCTTATAGGCGTTTG	Chromosome	1	25	3664863	3664887	9.5e-07	Chromosome	25	56	3658250	3658281	1.2e-10
315373_1	TAGGCAAACCAACGCATAAACCAAACCTGGTGTGCGGTCCGACAGTGTAGGCAAACCAACGCATAAACCAAACCTGGTGTGCGGTCCGGTG	Chromosome	2	41	1571602	1571563	4e-13	Chromosome	46	90	3667140	3667096	3.1e-14
315364_1	TAGGCAAACAAACGGATAAACCAAACCTGGTGTGCGGTCCGACAGTGTAGGCAAACCAACGGATAAACCAAACCTGGTGTGCGGTCCGGTG	Chromosome	2	41	1571602	1571563	4e-13	Chromosome	46	90	3667140	3667096	6.6e-16
315375_1	TAGGCAAACCAACGGATAAACCAAACCTGGAGTGACAGTGTAGGCAAACCAACGGATAAACCAAACCTGGTGTGCGGTCCGGTG	Chromosome	2	34	3667137	3667105	2.8e-09	Chromosome	39	83	1571605	1571561	5.9e-16
315376_1	TAGGCAAACCAACGGATAAACCAAACCTGGCGTGCGGTCCGACAGTGTAGGCAAACCAACGGATAAACCAAACCTGGCGTGCGGTCCGGTG	Chromosome	2	41	1571602	1571563	4e-13	Chromosome	46	90	3667140	3667096	3.1e-14
315382_1	TAGGCAAACCAACGGATAAACCAAACCTGGTGTGCGGTCCAGTGTAGGCAAACCAACGGATAAACCAAACCTGGTGTGCGGTCCGGTG	Chromosome	2	40	1571602	1571564	2.9e-14	Chromosome	43	87	3667140	3667096	6.3e-16
315390_1	TAGGCAAACCATCGGATAAACCAAACCTGGTGTGCGGTCCGACAGTGTAGGCAAACCATCGGATAAACCAAACCTGGTGTGCGGTCCGGTG	Chromosome	2	41	1571602	1571563	4e-13	Chromosome	46	90	3667140	3667096	3.1e-14
315391_1	TAGGCAAACTAACGGATAAACCAAACCTGGTGTGCGGTCCGACAGTGTAGGCAAACCAACGGATAAACCAAACCTGGTGTGCGGTCCGGTG	Chromosome	2	41	3667137	3667098	4e-13	Chromosome	46	90	1571605	1571561	6.6e-16
316958_1	TAGTGTTCTTACGGACGTGGGGGTTGTTTTTCTTGGTTCTGCACTGCTCTGG	Chromosome	1	25	4606245	4606221	8.2e-07	Chromosome	26	52	1335223	1335249	0.00014
318426_1	TATACCGCTGCTTCTGAACGTGTTCGGCCTGGCATTATTTTGTATGGCGCTTCGCCGTCCAGTCAGTGG	Chromosome	1	21	3665418	3665398	0.00021	Chromosome	22	69	1239494	1239541	9.7e-18
320012_1	TATCGAAGACGTGCCGGATGTCGTTTTTGCAACGAAAAGTTTTATCGGAAGGCGTGTTCGGCTGAACTTTG	Chromosome	1	30	2535932	2535961	2.2e-09	Chromosome	31	70	2942710	2942749	6.1e-10
320289_1	TATCGCTAGCACCAGGTATAACCAATTTCCCTGGTGTTGGCGTGTATCGCTAGCACCAGGTATAACCAATTTCCCTGGTGTTGGCGCAGTG	Chromosome	45	69	4424524	4424500	1.9e-06	Chromosome	69	90	3350641	3350662	8.6e-05
321896_1	TATGGACCTTTTATGACTGTACACATGTTCCGGGCGAATACAAGCTGGGTTAAGACTTG	Chromosome	1	23	1704937	1704959	0.0006	Chromosome	25	58	455407	455440	4.6e-10
322300_1	TATGGGAGTGGGTTGCAAAAGAAGTTACCGCAAAGAAAAATAACTCCCACTCCCGGCATACG	Chromosome	2	25	225183	225206	3.9e-06	Chromosome	28	62	4085908	4085874	6.5e-09
322547_1	TATGTCAGAACAAAACAACACTGAAATGTCGGGTGGTTTGTTACTTGTTATGCCGGGGATATGCAAGAAACGCGCAG	Chromosome	2	28	3784128	3784102	1.1e-07	Chromosome	29	75	1647099	1647053	8.8e-14
323811_1	TATTATTATTGGTGCCGGAAGCCGCAGGCTAGTGAGCTAATTAACGAACTGGCTCAACGA	Chromosome	1	20	2172382	2172363	0.00062	Chromosome	23	56	2709364	2709331	4.8e-05
324253_1	TATTCCTGTACTTGGTGTTACTGCGAAGGGGGGACGGAGAAGTTTAAGCGTGTAGGCTGGTTTTCCAGGCA	Chromosome	1	42	227152	227193	4.7e-16	Chromosome	42	71	3425319	3425290	2.2e-09
325291_1	TATTGGTAAAATCTTTGAAACCAACCACGAACTTTTGTCTTACGGTTGTGATGTTGTGTCGTTGTGTTTG	Chromosome	2	29	2536035	2536062	2.8e-08	Chromosome	29	70	2942743	2942784	9.9e-13
325387_1	TATTGTTCTGAATACGCTTCAGCGACTTATATTCGGTAGCAAGGTTAACCGAATAGGGGAGCCGAAGGGG	Chromosome	1	22	1570559	1570538	6e-05	Chromosome	19	69	3944283	3944333	2.1e-19
326100_1	TATTTGCCCGCAGCAGCCTGTGTGCGCTCAGCGCGTTCTTTCATTCTATATACTTTGGAGTTATAG	Chromosome	2	32	1511665	1511695	5.5e-10	Chromosome	33	62	3311719	3311690	9.2e-08
331063_1	TCCCTGCTGGTGTTGTCACGCAACCTTCCGCAACTGGGCATTGACAGTGGAGCTCTGCGTCGCTTCAAGCG	Chromosome	2	46	3553545	3553589	2.2e-14	Chromosome	51	71	3210822	3210842	0.00022
332329_1	TCGAGATTGCGGAGAGCTTTTTTAACTCCGTGTACTGCGAATCTCTGTTTGCCCAGTTGAAGGAGCGCAAAGAAGGCGCATTG	Chromosome	1	37	4218882	4218918	3.5e-13	Chromosome	35	82	1317214	1317167	1.3e-17
333635_1	TCGTCAGAACCTGGCCACTTTCTGCCAGACCTGGGAGAGATCAGAACCTGGCCACTTTCTGCCAGACCTGGGAG	Chromosome	1	36	3667413	3667378	1.1e-12	Chromosome	41	73	1571875	1571843	5e-11
333636_1	TCGTCAGAACCTGGCCACTTTCTGCCAGACCTGGGAGAGATCGTCAGAACCTGGCCACTTTCTGCCAGACCTGGGAG	Chromosome	1	36	1571878	1571843	1.1e-12	Chromosome	41	76	3667413	3667378	1.1e-12
334340_1	TCTAATTACAAGAACCAGGGGCGGAAAGTTTGAATGAATATTAATGCACTTCTTGCTGGGCCAAAAC	Chromosome	2	27	686842	686817	3.4e-07	Chromosome	28	64	2385503	2385539	1.2e-06
334898_1	TCTACTAAACTGGTACTGGGCGCGGTTCGTGGTACCGTTGTTACCGGTCGTGTAGAACGCGA	Chromosome	2	26	1757428	1757452	1.1e-06	Chromosome	27	61	3470661	3470627	3e-12
338783_1	TCTCTTGCGCAGGGCGAGCGTCTGTAACAGTGTCTCTTGCGCAGAACGAACGTG	Chromosome	2	21	963934	963953	0.00052	Chromosome	19	36	4328712	4328695	0.0068
343040_1	TCTTTCGAAATTATTATGGGAGACACCAAGCAACTGTGCATTTGGCGCATCGGTCAGAACCAGTGGCG	Chromosome	1	21	3665131	3665111	0.00021	Chromosome	21	64	10191	10234	7.4e-14
343745_1	TGAACGATTTTTTTCAGGAGACACGAGGCATTTTTTTATAACGATATTTTTAC	Chromosome	2	26	4274098	4274122	8.4e-07	Chromosome	27	49	2269924	2269946	1.1e-05
343888_1	TGAAGGAACGCTACTGAGAGTAAAGACATTAATGTCACAGTGTGAAGGAACGCTACAGAGAGTAAAGACATTAATGG	Chromosome	1	34	1552713	1552680	6.8e-10	Chromosome	34	51	2526753	2526736	0.012
343887_1	TGAAGGAACGCTACTGAGAGTAAAGACATTAATGTCACAGTGTGAAGGAACGCTAATGAGAGTAAAGACATTAATGT	Chromosome	1	34	1552713	1552680	6.8e-10	Chromosome	34	51	2526753	2526736	0.012
343889_1	TGAAGGAACGCTACTGAGAGTAAAGACATTAATGTCACAGTGTGAAGGAACGCTACCGAGAGTAAAGACATTAATGT	Chromosome	1	34	1552713	1552680	6.8e-10	Chromosome	34	51	2526753	2526736	0.012
343890_1	TGAAGGAACGCTACTGAGAGTAAAGACATTAATGTCACAGTGTGAAGGAACGCTACGGAGAGTAAAGACATTAATGT	Chromosome	1	34	1552713	1552680	6.8e-10	Chromosome	34	51	2526753	2526736	0.012
343891_1	TGAAGGAACGCTACTGAGAGTAAAGACATTAATGTCACAGTGTGAAGGAACGCTACTGAAAGTAAAGACATTAATGT	Chromosome	1	34	1552713	1552680	6.8e-10	Chromosome	34	51	2526753	2526736	0.012
343901_1	TGAAGGAACGCTACTGAGGGTAAAGACATTAATGTCACAGTGTGAAGGAACGCTACTGAGGGTAAAGACATTAATGG	Chromosome	1	34	1552713	1552680	3.2e-08	Chromosome	34	51	2526753	2526736	0.012
343902_1	TGAAGGAACGCTACTGGGAGTAAAGACATTAATGTCACAGTGTGAAGGAACGCTACTGGGAGTAAAGACATTAATGG	Chromosome	1	34	1552713	1552680	3.2e-08	Chromosome	34	51	2526753	2526736	0.012
344388_1	TGACAGTGGATGAACACCTTGCTGATGCCCACCTTGCTGAAG	Chromosome	3	28	2252519	2252494	0.00033	Chromosome	25	42	533575	533592	0.0043
344874_1	TGAGCACGCCTAGGCGTGTGACTGCGGTTGAGCGTGTCGGGAGCAAGTGTGAGCAGCAAAGTGGAACAACTGCGTG	Chromosome	2	26	4169177	4169201	6.8e-05	Chromosome	26	76	4223805	4223855	5.1e-21
344952_1	TGAGTGTAGAATGCAACGTGCTTTGCTTACTTCACGTAATCGGATTTGAAAAG	Chromosome	1	26	3665238	3665213	2.3e-07	Chromosome	27	48	4049938	4049959	3.9e-05
345140_1	TGATATTCCTGTTTTTCAGCAACAGTGTGATATTCCTGTTTTTCAGC	Chromosome	9	26	3399713	3399730	0.0053	Chromosome	29	46	3665543	3665526	0.0053
345139_1	TGATATTCCTGTTTTTCAGCAACAGTGTGATATTCCTGTTTTTCAGA	Chromosome	9	26	3399713	3399730	0.0053	Chromosome	29	46	3665543	3665526	0.0053
347290_1	TGCTGAAAAACATAACCCACAAAATGCCAACAGTGTGCTGAAAAACATAACCCACAAAATGCG	Chromosome	13	32	3633841	3633822	0.00067	Chromosome	37	62	2167114	2167139	1.4e-05
348198_1	TGCTGTGTGAAGTCTTTGCCCATCTCCCACTTTGTCTGTCGCTTTAGACTATACACAGCATAC	Chromosome	1	30	1770433	1770462	8.6e-08	Chromosome	31	62	1216683	1216714	1.4e-10
348200_1	TGCTGTGTGTAGTCTTTGCCCATCTACCACTTTGTCTGTCGCTTTAGACTATACACAGCATAC	Chromosome	1	30	1770433	1770462	8.6e-08	Chromosome	31	62	1216683	1216714	1.4e-10
348201_1	TGCTGTGTGTAGTCTTTGCCCATCTCCCACTTTGTCTGTCACTTTAGACTATACACAGCATAC	Chromosome	1	30	1770433	1770462	1.8e-09	Chromosome	31	62	1216683	1216714	6.6e-09
348202_1	TGCTGTGTGTAGTCTTTGCCCATCTCCCACTTTGTCTGTCGCATTAGACTATACACAGCATAC	Chromosome	1	30	1770433	1770462	1.8e-09	Chromosome	31	62	1216683	1216714	6.6e-09
348204_1	TGCTGTGTGTAGTCTTTGCCCATCTCCCACTTTGTCTGTCGCTTTAGACTATACACAACATAC	Chromosome	1	30	1770433	1770462	1.8e-09	Chromosome	31	62	1216683	1216714	6.6e-09
348205_1	TGCTGTGTGTAGTCTTTGCCCATCTCCCACTTTGTCTGTCGCTTTAGACTATACACAGTATAC	Chromosome	1	30	1770433	1770462	1.8e-09	Chromosome	31	62	1216683	1216714	6.6e-09
348207_1	TGCTGTGTGTAGTCTTTGCCCATCTCCCACTTTTTCTGTCGCTTTAGACTATACACAGCATAC	Chromosome	1	30	1770433	1770462	1.8e-09	Chromosome	31	62	1216683	1216714	6.6e-09
348203_1	TGCTGTGTGTAGTCTTTGCCCATCTCCCACTTTGTCTGTCGCTTTAGACCATACACAGCATAC	Chromosome	1	30	1770433	1770462	1.8e-09	Chromosome	31	62	1216683	1216714	6.6e-09
348208_1	TGCTGTGTGTAGTCTTTGCCCATCTCCCGCTTTGTCTGTCGCTTTAGACTATACACAGCATAC	Chromosome	1	28	1770433	1770460	2.4e-08	Chromosome	31	62	1216683	1216714	1.4e-10
348210_1	TGCTGTGTGTAGTCTTTGCCCATCTCTCACTTTGTCTGTCGCTTTAGACTATACACAGCATAC	Chromosome	1	30	1770433	1770462	8.6e-08	Chromosome	31	62	1216683	1216714	1.4e-10
348211_1	TGCTGTGTGTAGTCTTTGCTCATCTCCCACTTTGTCTGTCGCTTTAGACTATACACAGCATAC	Chromosome	1	30	1770433	1770462	8.6e-08	Chromosome	31	62	1216683	1216714	1.4e-10
348209_1	TGCTGTGTGTAGTCTTTGCCCATCTCCTACTTTGTCTGTCGCTTTAGACTATACACAGCATAC	Chromosome	1	30	1770433	1770462	8.6e-08	Chromosome	31	62	1216683	1216714	1.4e-10
348561_1	TGGCATGCGCCTGCGCCGAAAAATGGTCAGGCCATCGACCTGCGTTGCGTAAATATGGTTGCCGATCTGTGGC	Chromosome	1	33	1571724	1571692	4.9e-11	Chromosome	31	73	3667298	3667256	1.4e-16
348689_1	TGGGCACTCGAAGATACGGATTCTTAACCCTTAAAGAAGCGTTCTTTGAAGTGCTCACACAG	Chromosome	1	28	4208034	4208061	2.3e-08	Chromosome	29	62	4037073	4037106	1.1e-11
348738_1	TGGGTGGGGTAACGGCTCACCTAGGCCACAGAGTGGGTGGGGTAACGGCTCACCTAGGC	Chromosome	3	29	4166912	4166938	3.6e-06	Chromosome	32	59	4208396	4208423	1e-06
349820_1	TGTCCACGCCGTAAACGATGTCGACTTGGAGGTTGTGCACGCGTTAAGTCGACCGCCTGGGGAGTGG	Chromosome	2	38	4208949	4208985	2.6e-13	Chromosome	39	65	2730293	2730267	9.4e-08
350035_1	TGTGGGCACTCGAAGATACGGATTCTAAAAAAAGAAGCGTACTTTGTAGTGCTCACACAG	Chromosome	1	26	3428877	3428852	2.9e-07	Chromosome	31	60	4168205	4168234	1.7e-09
350475_1	TGTTCCCCGTGCCAACAGGGAGTGTTATAACGGTTTATTAGACGATGATTACGGCCTCAGGCGAG	Chromosome	2	41	3664878	3664917	2.5e-13	Chromosome	41	64	105258	105281	4.2e-06
351190_1	TTAACCATGCCGATAACGTGATTGGCGGACTGTTAATCCGTATGTCACTGGTTCGAGTCCAGTCAGAGGAGCC	Chromosome	1	23	4160531	4160509	1.8e-05	Chromosome	24	73	2062285	2062334	1.7e-20
354284_1	TTCCGCGTGTAGTCTTTGCCCATCTCCCACTTTGTCTGTCGCTTTAGACTATACACAGCATAC	Chromosome	7	30	1770439	1770462	4e-06	Chromosome	31	62	1216683	1216714	1.4e-10
354355_1	TTCCTCTGTAGTTCAGTCGGTAGAACGGCGGAATCTTACACAGGGTTCATCTGTAGTTCAGTCGGTAGAACGGCGGAG	Chromosome	1	38	2059850	2059887	1.9e-10	Chromosome	39	77	2062252	2062290	2.5e-09
356239_1	TTGTATTCAATTTGCCGGATGACGGTGTTGTATTCAATTTGCCGGAC	Chromosome	2	20	2560156	2560174	0.0015	Chromosome	17	35	3365038	3365056	0.0015
357203_1	TTTATTAGTCTGGAGACCCTACACGACGCTCTTCCAATCTTCGACAGTGTTTATTAGTCTGGAGAC	Chromosome	35	52	2030343	2030326	0.0092	Chromosome	49	66	3664909	3664926	0.0092
357843_1	TTTCCAGCCCTCTCGATTTTTACGTAGCACGGACGAGATCGTGTGACATGCTGAAAAACATAACCCATAAAATGCC	Chromosome	35	53	4546976	4546958	0.0031	Chromosome	50	75	2167114	2167139	4e-07
358910_1	TTTGCAATTGGTCTGCGATTCAGACCATGTGTCCTCCGGTGCGCAGCAGCGTTTCGAACAGACTGACTGTCATCA	Chromosome	1	29	2942781	2942809	8.5e-09	Chromosome	29	73	4218674	4218718	5.1e-11
359117_1	TTTGCTGTGTGTAGTCTTTGCCCATCTCCAGGGCTGATTTATTACTACACACAGCAGAG	Chromosome	2	29	1770432	1770459	2.2e-08	Chromosome	30	57	1103308	1103281	2.2e-08
362557_1	TTTTGTTGCCAGCGGTTCCAACAGTCTTTTGTTGCCAGCGGTTCG	Chromosome	4	24	768910	768890	0.0049	Chromosome	25	45	224888	224908	0.0049
362558_1	TTTTGTTGCCAGCGGTTCCAACAGTCTTTTGTTGCCAGCGGTTCGGG	Chromosome	4	24	768910	768890	0.0053	Chromosome	25	46	224888	224909	0.0015
363918_1	TTTTTCCTTGCCATAGACACCCTTCCTTCTTACCTTAAAGAAGCGTACTTTGTAGTGCACACACCG	Chromosome	2	27	4106330	4106355	0.00071	Chromosome	25	64	4168193	4168232	1.2e-11
288_1292	CTATCACGATAAGCAGTAAGCCGGTCATAAGCAGTAAGCCGGTCATAA	Chromosome	10	30	228881	228901	0.00012	Chromosome	28	48	3946825	3946845	0.00012
1644_603	TCATCACGATATTTGTGTTGATCATATTTGTGTTGATCCTATTT	Chromosome	9	26	1335588	1335571	0.0047	Chromosome	25	44	2560305	2560286	0.00036
1730_598	AAGGAAGAAGCTTGCTTCTTTGATCACGAAGGAAGAAGCTTGCTTCTTC	Chromosome	2	29	4035604	4035631	3.4e-05	Chromosome	30	48	223844	223862	0.0016
3527_538	GCTCATCAGCAGTGTAAAAGGCACATCACGGCTCATCAGCAGTGTAAAAGGCG	Chromosome	5	23	4250448	4250466	0.0018	Chromosome	23	40	2468701	2468684	0.0066
4404_517	AATGGGGATTTTTAACGACCATCACGAATGGGGATTTTTAACGAG	Chromosome	2	20	3448213	3448195	0.0014	Chromosome	20	39	3597584	3597565	0.00038
5347_496	TCATCACGTCTCAACGTGCGGGGGTTTTCTCAACGTGCGGGGGTTTTCTC	Chromosome	9	31	1269367	1269389	9.9e-06	Chromosome	28	50	1270437	1270459	9.9e-06
8273_431	CACGCCGAAGGTGTTTTGGCGGATTGAGAGAAGATTTTCAGGCACGCCGAAGGTGTTTTGGCGGATTGAGAGAAGATTTTCAGC	Chromosome	2	41	4212950	4212989	7.6e-15	Chromosome	44	84	4040427	4040467	2.1e-15
8655_422	CTGTGGGCACTCGAAGATACGGATTCTTCCTCCTTACCTTAAAGAAGCGTTCTTTGCAGTGCTCACACAG	Chromosome	2	28	223656	223682	1e-07	Chromosome	29	70	3943342	3943383	4.6e-16
8783_419	CTGTGGGCACTCGAAGATACGGATTCCTTAAAGAAGCGTACTTTGCAGTGCTCACACAG	Chromosome	2	26	223656	223680	1e-06	Chromosome	26	59	225313	225346	9.9e-12
9313_406	GACGCAGGGGGTCGCGGGTTCGAGTCCCGTCCGTTCCGCCACACGGACGCAGGGGGTCGCGGGTTCGAGTCCCGTCCGTTCCGCCACCCTG	Chromosome	2	42	228965	229005	2.4e-15	Chromosome	47	90	3946909	3946952	5.1e-17
9577_400	CTGTGGGCACTCGAAGATACGAAACCCTTAAAGAAGCGTACTTTGTAGTGCTCACACAG	Chromosome	2	21	223656	223675	0.0006	Chromosome	26	59	4168201	4168234	9.9e-12
10209_383	GTGTGGGCACTCGAAGATACGGATTCTCCTTAAAGAAGCGTTCTTTGCAGTGCTCACACAG	Chromosome	1	27	3941692	3941718	8.2e-08	Chromosome	28	61	4209689	4209722	1e-11
10220_383	TTGTGGGCACTCGAAGATACGGATTCTTAACGTCGCCTTAAAGAAGCGTACTTTGCAGTGCTCACACAG	Chromosome	2	36	3428877	3428843	3.5e-12	Chromosome	36	69	225313	225346	1.3e-11
10512_373	CATTGCTGTGTGTAGTCTTTGCCCATCTCCCAGGGCTGATTTATTACTACACACAGCAGTGCAG	Chromosome	2	32	1770431	1770461	5.2e-10	Chromosome	32	63	1103308	1103277	1.5e-10
10556_372	CTTTTCGGGTGGTTTGTTACTTGTTTTACCGGGGATATGCCAACAAACCACCCCAATAC	Chromosome	2	42	1647102	1647062	1.3e-15	Chromosome	41	58	1292959	1292942	0.0078
10571_372	GTTAATCCGTATGTCACTGGTTCGAGTCCAGTCAGAGGAGCATCACGGTTAATCCGTATGTCACTGGTTCGAGTCCAGTCAGAGGAGCCAG	Chromosome	1	41	2062293	2062333	2.4e-15	Chromosome	45	90	2058072	2058027	1.8e-16
10709_368	GACCGATCTCGGCGTGAAAGCTATTGATGCGTCTTTACCGCCGAGGTTGCAGAC	Chromosome	2	29	1301653	1301680	1.9e-08	Chromosome	31	53	923135	923157	1.1e-05
10856_364	CTGTGGGCACTCGAAGATACGGATTCTTACCTTAAAGAAGCGTTCTTTGCAGTGCTCACACAG	Chromosome	2	29	223656	223683	2.4e-08	Chromosome	26	63	4209685	4209722	6.6e-14
10927_362	GAGAGATGGTAATGCCGGGCGACAACATCAACCTGTTGTCGCCTGCTCTGGATTG	Chromosome	2	31	4176987	4177016	1.5e-09	Chromosome	30	54	1705704	1705728	9e-07
11074_357	ATGGATAGTCATTTCGGCAAGGGTTCCTATCCCTGTCTTCCCACGATGGATAGTCATTTCGGCAAGGGTTCCTATCCCTGTCTTCCCCCAC	Chromosome	42	73	1741259	1741290	1.1e-08	Chromosome	74	91	4106350	4106367	0.014
11184_354	AACTTAAACGTATCGTTCATCATCACGAACTTAAACGTATCGTTCAA	Chromosome	9	26	1827093	1827110	0.0053	Chromosome	29	46	106574	106591	0.0053
11216_354	TTTCCCTGGTGTTGGCGCAGTATTCGCGCACCCCGGTCTCTTGATTTGCCCTTCTGTAGCCATCACCAGAG	Chromosome	1	39	3350642	3350680	2.2e-14	Chromosome	40	71	3888505	3888536	1.7e-10
11445_347	GTGTGGGCACTCGAAGATACGGATTCCTTAAAGAAGCGTACTTTGCAGTGCTCACACAG	Chromosome	1	26	3428878	3428853	2.8e-07	Chromosome	26	59	225313	225346	9.9e-12
11729_338	GATGCCAGCTTTCGCTAACCACGGCGGGTAATATTCTGATTAGCCTGGTCGTGATTAGCGTGGTGGTGATTC	Chromosome	2	38	3340172	3340136	2.9e-13	Chromosome	37	71	3950341	3950375	3.7e-12
11914_333	CTCTCGGAAGCGCTGGCGAAACTTACTGCCGGGCTTCCGTCATGTGCCGTTTGGCAATG	Chromosome	2	23	980248	980269	4.7e-05	Chromosome	23	58	3220100	3220135	7.7e-13
12125_328	TACAAGGAGGGGGTCGGCGGTTCGATCCCGTCATCACCCACCACGTACAAGGAGGGGGTCGGCGGTTCGATCCCGTCATCACCCACCACTG	Chromosome	1	44	780798	780841	5.1e-17	Chromosome	46	90	2521084	2521128	1.4e-17
12272_324	CAGCTGTACCAGGAACCACCTCCTTAGCCTGTGTAATCTCCCTTACACGGGCTTGTTCAATGGGGAGATGGTTCGCTGGGAG	Chromosome	2	57	2167141	2167196	4.4e-22	Chromosome	55	81	3952513	3952539	1.2e-07
12345_323	GTTGCTGTGTGTAGTCTTTGCCCATCTCCCTTTATTACTACACACAGCAGTG	Chromosome	2	30	1770432	1770460	4.9e-09	Chromosome	31	52	1103300	1103279	3.8e-05
12300_324	TACGCAGGGGGTCGCGGGTTCGAGTCCCGTCCGTTCCGCCACACGTACGCAGGGGGTCGCGGGTTCGAGTCCCGTCCGTTCCGCCACCCTG	Chromosome	2	42	228965	229005	2.4e-15	Chromosome	47	90	3946909	3946952	5.1e-17
12608_317	TTTATCACGGATCCCGTCGGCTCCAGTTAGGGGAGCCGAAGGGAAACCGC	Chromosome	11	28	3890435	3890452	0.0059	Chromosome	28	49	3944318	3944339	3.6e-05
13304_303	CGACTTCAATGAAGCGCGCAATGTCAGTGCGCTGTTCCTCGGAAAGGGCAGGGGCGAGTGTAAATGCGTACACCCGCCCTGCTGCCCAGTG	Chromosome	2	69	3525663	3525583	2.3e-20	Chromosome	70	90	2533807	2533827	0.00031
13763_296	GATTGCTGTGTGTAGTCTTTGCCCATCTCCCATTCATCTTATTTTTGTCTGTCGCTTTAGACTATACACAGCATAA	Chromosome	2	32	1770431	1770461	6.7e-10	Chromosome	31	76	1216670	1216715	3.1e-18
14068_292	GTGTGGGCACTCGAAGATACGGATTCTTAACGTCGCAAGACGAAAAATGCCTTAAAGAAGCGTTCTTTGAAGTGCTCACACAG	Chromosome	1	49	3941692	3941740	7.5e-20	Chromosome	50	83	4037073	4037106	1.6e-11
14775_283	GTTTCCCTGGTGTTGGCGCAGTATTCGCGCACCCCGGTCTTTGCTGTCGCCATCGCCAGTGGTATGC	Chromosome	2	40	3350642	3350680	2e-14	Chromosome	41	66	4521923	4521898	3.4e-07
14771_283	GTGTGGGCACTCGAAGATACGGATTCTTAACGTCGCAAGACGAAAAATGAATACCAAAGAAGCGTACTTTGCAGTGCTCACACAG	Chromosome	1	57	3941692	3941748	2.8e-24	Chromosome	56	85	225317	225346	2.8e-09
15014_280	GTTTCCCTGGTGTTGGCGCAGTATCCGCGCACCCCGGTCTCTCACCTTGAGCAGCTGCAAAAACACCAGGGAAATG	Chromosome	2	40	3350642	3350680	1.1e-12	Chromosome	41	75	3933607	3933641	4e-12
15114_279	GTGTGGGCACTCGAAGATACGGATTCTTAACCCTTAAAGAAGCGTTCTTTGAAGTGCTCACACAG	Chromosome	1	31	4166543	4166573	5.4e-10	Chromosome	32	65	4037073	4037106	1.2e-11
15259_277	GAATATGAAATGTCCGGTTTGCCACCAGGGAGAAATTTTCCCTGGTGTTGGCGCAGTATTCGCGCACCCCGGTCC	Chromosome	2	36	3168249	3168215	3.9e-12	Chromosome	37	74	3350642	3350679	8.5e-14
15498_275	TGATTTTCGCCGGTTGTGACCATCACGTGATTTTCGCCGGTTGTGAA	Chromosome	8	25	3314843	3314826	0.0053	Chromosome	28	45	3293464	3293481	0.0053
16033_269	GAGCTGTACCAGGAACCACCTCCTTAGCCTGTGTACTGGTATCCTGGTACGACAACGA	Chromosome	2	35	2167141	2167174	9.7e-12	Chromosome	35	58	1863691	1863714	3.5e-06
16376_266	TTGTGGGCACTCGAAGATACGGATTCCTTAAAGAAGCGTACTTTGTAGTGCTCACACAG	Chromosome	2	26	4208032	4208056	1e-06	Chromosome	26	59	4168201	4168234	9.9e-12
16448_265	GGCACGCAGGGGGTCGCGGGTTCGAGTCCCGTCCGTTCCGCCGGGCACGCAGGGGGTCGCGGGTTCGAGTCCCGTCCGTTCCGCCACCCTG	Chromosome	3	42	236967	237006	8.5e-15	Chromosome	46	90	3946908	3946952	1.4e-17
16826_261	CTGTGGGCACTCGAAGATACGGATTCTTAACGTCCTTAAAGAAGCGTACTTTGCAGTGCTCACACAG	Chromosome	2	34	3428877	3428845	4.3e-11	Chromosome	34	67	3427220	3427187	1.2e-11
16841_261	GACAAGGAGGGGGTCGGCGGTTCGATCCCGTCATCACGGACAAGGAGGGGGTCGGCGGTTCGATCCCGTCATCACCCACCA	Chromosome	2	37	781102	781137	1.2e-12	Chromosome	40	81	2521085	2521126	5.6e-16
17383_256	GTCATCGCCCTGGGGGGCACCATTGGACGTGTCCCAGGGCACACGGTCATCGCCCTGGGGGGCACCATTGGACGTGTCCCAGGGCAACGTG	Chromosome	47	71	3980942	3980966	1.9e-06	Chromosome	71	91	453831	453811	0.00031
17427_255	CACCTTGAGCAGCTGCAAAAACACCAGGGAAATACCTTTCCCTGGTGTTGGCGCAGTATTCA	Chromosome	1	39	3933609	3933647	8.3e-13	Chromosome	37	61	3350642	3350666	1.1e-06
18572_245	GTTTTCCTTGCCATAGACACCATCCCTGTCTTCCCCCACATGACGCTGGGGATGGTGGCAGC	Chromosome	1	42	4106329	4106370	3.8e-16	Chromosome	43	62	1023751	1023732	0.00065
18782_243	GCACGCCACAACATATTGCCAATCACGGCACGCCACAACATATTGCG	Chromosome	9	26	973363	973380	0.0053	Chromosome	29	46	4224766	4224783	0.0053
19140_239	AGATAAGGGTGAGGTCGGTGGTTCAAGTCCACTCAGGCCTATCACGAGATAAGGGTGAGGTCGGTGGTTCAAGTCCACTCAGGCCTACCAC	Chromosome	2	44	4037175	4037217	8.5e-15	Chromosome	48	90	3427118	3427076	1.8e-16
20417_228	GTGTGGGCACTCGAAGATACGGACCTTAAAGAAGCGTACTTTGCAGTGCTCACACAG	Chromosome	1	23	4208031	4208053	1.2e-05	Chromosome	23	57	3427221	3427187	2.6e-12
22071_210	ATCCTCTGTAGTTCAGTCGGTAGAACGGCGGACTCCATCACGATCCTCTGTAGTTCAGTCGGTAGAACGGCGGACTG	Chromosome	2	34	2062260	2062292	5.3e-11	Chromosome	38	77	2058109	2058069	1.5e-11
22000_211	GAACAGGAAGAAGCTTGCTTCTTTGCTGACGAGTGGCGGACACGGAACAGGAAGAAGCTTGCTTCTTTGCTGACGAGTGGCGGACGGGTGG	Chromosome	2	41	223841	223880	8.5e-15	Chromosome	46	90	4166729	4166773	1.4e-17
22450_206	CTGTGGGCACTCGAAGATACGGATTCTTAACGTCGCCTTAAAGAAGCGTACTTTGCAGTGCTCACACAG	Chromosome	2	36	223656	223690	3.5e-12	Chromosome	36	69	225313	225346	1.3e-11
22743_203	TTTACCACCACCATCACCATTACCACAAAATTGTTGGTGGTGGTATCGCG	Chromosome	2	27	212	237	2.1e-07	Chromosome	30	49	3071989	3071970	0.00046
22910_201	TTTATCACGCCGGGCAGCATATCCGTTCTGTATGCTGCATTCCGGCTTGATA	Chromosome	2	25	930702	930679	2.9e-06	Chromosome	25	51	3305662	3305636	6.3e-08
23241_196	ATCCTCTGCAGTTCAGTCGGTAGAACGGCGGACTCCATCACGATCCTCTGCAGTTCAGTCGGTAGAACGGCGGACTC	Chromosome	2	34	2059851	2059883	2.5e-09	Chromosome	38	76	2058109	2058070	2.5e-09
23264_196	CTTATCACGTCTCAACGTGCGGGGGTTTTCTCTTAGCCCCCGTTCTGTTG	Chromosome	10	34	1270437	1270461	7.6e-07	Chromosome	33	50	1269872	1269889	0.0059
23397_195	TCTTCATCAGCAGTGTAAAAGGCAAGGGGTAAAATTACCCCTTCGCCTACATGC	Chromosome	2	32	4250444	4250474	1.9e-08	Chromosome	33	53	1241903	1241883	0.00015
23770_189	CATACGGGCGATGACAAATGCAAAACTGCCTGATGCGCTACGCTTATCAGGCCTGGAAAG	Chromosome	1	27	3101801	3101775	8e-08	Chromosome	28	46	4478909	4478891	0.0022
23941_187	CGGGGCTATAGCTCAGCTGGGAGAGCGCCTGCTTTGCACGCCGCGGGGCTATAGCTCAGCTGGGAGAGCGCCTGCTTTGCACGCAGGAGGC	Chromosome	2	41	3427033	3426994	8.5e-15	Chromosome	45	90	4037260	4037305	3.9e-18
23966_187	GTGTGGGCACTCGAAGATACGGATTCTTAACGACCTTACCTTAAAGAAGCGTACTTTGCAGTGCTCACACAG	Chromosome	1	32	4166543	4166574	1.7e-10	Chromosome	34	72	225308	225346	2.2e-14
24114_185	TGGCTTCAGTATTCCTGAGTACCGTAAACCCTGTCAGGGAATGTTGTCTGCTACTCAACCAATTGAGTAGTAGCAACTCACGTTCCCAGAC	Chromosome	2	64	194853	194929	2.4e-15	Chromosome	62	89	4106290	4106317	4e-08
24343_181	GACAAGGAGGGGGTCGGCGGTTCGATCCCGTCATCACCCACCGGACAAGGAGGGGGTCGGCGGTTCGATCCCGTCATCACCCACCACTTTG	Chromosome	2	42	780799	780839	2.4e-15	Chromosome	45	90	2521085	2521130	3.9e-18
24420_180	GGGAGCGGTAGTTCAGTCGGTTAGAATACCTGCCTATCACGGGGAGCGGTAGTTCAGTCGGTTAGAATACCTGCCTGTCACGG	Chromosome	2	41	228928	228967	3.5e-13	Chromosome	39	82	236927	236970	2.1e-15
24647_177	GTTGTTTTGTTTGAACATCTGCTTCCTTTCTGCTTCTTCTGGAACCGCAAGGCCAGAGGAAAAGTTGTCAAGGATGAGCAGGGAGCAAAAC	Chromosome	2	42	1421526	1421486	2.4e-15	Chromosome	45	88	2924266	2924223	5.1e-17
24793_175	TACATTTACCCTGTCTGTCCATAGTGATTAATGTAGCACCGCCTTTTGCAGGACATTCAGGGTAAAGATGC	Chromosome	1	44	2942839	2942882	3.6e-17	Chromosome	45	70	1930163	1930138	3.7e-07
25122_170	GTGTGGGCACTCGAAGATACGGATTCTTTCCTTACCTTAAAGAAGCGTTCTTTGAAGTGCTCACACAG	Chromosome	1	28	223655	223682	2.7e-08	Chromosome	29	68	4037067	4037106	5.7e-15
25357_165	CTGTGGGCACTCGAAGATACGGATTCTTAACGTCGTAAGACCTTAAAGAAGCGTACTTTGTAGTGCTCACACAG	Chromosome	2	41	4035416	4035455	3e-13	Chromosome	40	74	4168200	4168234	3.9e-12
25528_162	TAGCGCGTGGAAATTTGGTTTGGGGAGACTTTACCAATGGAAAACTTTAAACATCTCCCTGAACCGTTCCGCG	Chromosome	1	35	2710051	2710017	3.8e-12	Chromosome	36	72	3888729	3888765	2.9e-13
25501_162	CGGAACGGCGTTCCAGGGGCAGATACCCTGGTAGTCCACGCCGTGAACGGCGTTCCAGGGGCAGATACCCTGGTAGTCCACGCCG	Chromosome	4	22	4442338	4442356	0.0037	Chromosome	21	49	4208936	4208964	4.7e-07
25584_160	ACAAGATCGCTGCAGGGGCTGATAAGAAGCCCCTGCGCACTATCACGACAAGATCGCTGCAGGGGCTGATAAGAAGCCCCTGCGCACTTGG	Chromosome	46	71	461471	461496	2.4e-05	Chromosome	68	91	3450448	3450425	0.00031
25602_160	CTAATCACGGATTTACCCTGTCTGTCCATAGTCGTTTTTACGGATATGACAGGGTGAGC	Chromosome	11	32	2942842	2942863	4.7e-05	Chromosome	33	58	2946063	2946038	2.8e-07
25738_157	CAACCACTCATTGGCGCGCTGTCGGATTTTACTGACCGACACGCAACCACTCATTGGCGCGCTGTCGGATTTTACTGACCGACAGCGGCAG	Chromosome	44	70	2724861	2724835	1.4e-07	Chromosome	71	90	3888876	3888895	0.0011
25751_157	GAAATTGCGGGTAAACCTTCGTCTGAAGTGAGCATGATCCATGCTCGCGGTACTTATTGACGGGGGCCCGCACAG	Chromosome	2	55	1822108	1822055	1.1e-22	Chromosome	56	74	224689	224707	0.0031
25878_154	CATACGGAAGGCGCGAAGATGAAAAACACCGTCACCGTCGCGCCTTCGCGCGC	Chromosome	2	31	742810	742839	1.4e-09	Chromosome	31	53	2339811	2339789	1.1e-05
26040_151	GTGATATGTAGGTGAAGCGACTTGCTCGTGGAGCTGAAATCATCACGGTGATATGTAGGTGAAGCGACTTGCTCGTGGAGCTGAAATCAGC	Chromosome	2	42	3945412	3945452	2.4e-15	Chromosome	44	90	227462	227508	5.1e-17
26198_147	GCAATGTTATGCCGCTGCACCCTCAACTTACGTTATCCCTTAATGAGGGTTAATCAGTATGCAGTGGCATAAAAAAGG	Chromosome	2	39	4242611	4242574	8.9e-14	Chromosome	40	77	2312819	2312782	8.9e-14
26160_148	TAGGACACCGCCCTTTCACGGCGGTAACAGGGGTTCGAATCCGTAGGACACCGCCCTTTCACGGCGGTAACAGGGGTTCGAATCCCCTAGC	Chromosome	2	42	4209795	4209835	2.4e-15	Chromosome	45	90	3943456	3943501	3.9e-18
26341_144	GTGTGGGCACTCGAAGATACGGATTCTTAACGTCGCAAGACCCTTAAAGAAGCGTACTTTGCAGTGCTCACACAG	Chromosome	1	41	223655	223695	1.8e-15	Chromosome	42	75	2729615	2729582	1.4e-11
26674_136	TGTCATGCAGGGGGTCGCGGGTTCGAGTCCCGTCCGTTCCGCGTGTCATGCAGGGGGTCGCGGGTTCGAGTCCCGTCCGTTCCGCCACCCC	Chromosome	1	42	236964	237005	3.1e-14	Chromosome	44	90	3946905	3946951	5.1e-17
27041_126	GCCTGGTGTAACGAATTTTTTAAGTGCTTCTTGCTTAAGCAAGTTTCATCCCGACCCCCTCATTGAAATTCGTTACACCACGC	Chromosome	2	62	2025299	2025239	1.6e-26	Chromosome	61	83	3933644	3933666	2.1e-05
27019_127	TACAAGGAGGGGGTCGGCGGTTCGATCCCGTCATCACGTACAAGGAGGGGGTCGGCGGTTCGATCCCGTCATCACCCACCG	Chromosome	1	37	780798	780834	3.4e-13	Chromosome	39	80	2520964	2521005	5.6e-16
27255_120	CCGCTTCGGCGGGGTTTTTTAACTCTACTGCCCCGCCGAAATCACGCCGCTTCGGCGGGGTTTTTTAACTCTACTGCCCCGCCGAAAAAAC	Chromosome	1	20	3982822	3982841	0.0011	Chromosome	19	39	2240415	2240395	0.00031
27256_120	CGGGGCTACAGCTCAGCTGGGAGAGCGCCTGCTTTGCACGCGCGGGGCTACAGCTCAGCTGGGAGAGCGCCTGCTTTGCACGCT	Chromosome	2	41	3427033	3426994	3.6e-13	Chromosome	44	83	225500	225539	3.6e-13
27319_118	CAAGCCTGCGAAGGTGTGCTGTGAGGCATGCTGGAGGTATCGCAAGCCTGCGAAGGTGTGCTGTGAGGCATGCTGGAGGTATCAGAAGTGG	Chromosome	2	41	4169844	4169883	8.5e-15	Chromosome	44	90	4211246	4211292	1.1e-18
27578_111	GAGCCGTGGCGCTGGCGAACATCGACCCGATCATAGTGCATCAGTTCGCCATCGCCCCGGCGAGCCAG	Chromosome	2	34	2338272	2338240	4.4e-11	Chromosome	36	66	4399840	4399870	5.7e-10
27955_99	GGAAAGACGCGCATTTGTTATCATCATCCCTGAATTCAGAGTGAAATTTTGGCCACTCCTGAATCTCTGAAAGAAGGGGATGATGTAAAAC	Chromosome	2	58	2814802	2814859	6.5e-21	Chromosome	59	87	461548	461576	1.1e-08
28118_93	GAAGTTCCGACCTGCACGAATGGCGTAATGATGGCCAGGCTAGAATTTGGGTGGGTATCTTTTTATTAGCAGCACTGCTGGCGGCGCTGTG	Chromosome	2	41	227710	227749	8.5e-15	Chromosome	44	90	3338441	3338395	1.1e-18
28129_93	TCACGCACGCAGGGGGTCGCGGGTTCGAGTCCCGTCCGTTCCGCCACGCAGGGGGTCGCGGGTTCGAGTCCCGTCCGTTCCGCCA	Chromosome	6	47	228964	229005	6e-16	Chromosome	45	85	3946908	3946948	2.2e-15
28223_89	GAATTGGTCTGCGATTCAGACCATGGTAGCAAAGCTACCTTGTACATTTACCCTGTCTGTCCATAGTGAACGGATATGACAGGGTGAGAAT	Chromosome	2	69	2942786	2942865	6.5e-21	Chromosome	70	88	2946056	2946038	0.004
28252_88	CTTTTATGGCAGTGCCGAAAGGACTTACCGCCTTCGGCTTTTATGGCAGTGCCGAAAGGACTTACCGCCTTCGGCATTGCCGCGGG	Chromosome	37	61	2425574	2425550	1.7e-06	Chromosome	62	85	2424635	2424612	6.2e-06
28255_88	GAGTTCAGTCGGTAGAACGGCGGACTGTTTATCACGGAGTTCAGTCGGTAGAACGGCGGACTGTTAATCA	Chromosome	2	33	2059859	2059890	7.7e-09	Chromosome	38	69	2062268	2062299	1.7e-10
28242_88	AACAAGGAGGGGGTCGGCGGTTCGATCCCGTCATCACCCACCACGAACAAGGAGGGGGTCGGCGGTTCGATCCCGTCATCACCCACCACTG	Chromosome	2	44	2521085	2521127	1.8e-16	Chromosome	47	90	781102	781145	5.1e-17
28475_79	TTGTGGGCACTCGAAGATACGGATTCTTAACCCTTAAAGAAGCGTACTTTGCAGTGCTCACACAG	Chromosome	2	31	4035416	4035445	1.9e-09	Chromosome	32	65	225313	225346	1.2e-11
28520_77	CTACCAGGCCTGCGCCGATTTCTAAAAGATTGGCGCAGCCTGGTAGCGCG	Chromosome	1	23	2955524	2955502	9.9e-06	Chromosome	28	49	3708688	3708667	3.6e-05
28645_74	TATTAAGGGGTGTTGTAAGGGGATGGCTGGCCTGATTTTTCCTTGCCATAGACACCATCCCTGTCTTCCCCCACATGC	Chromosome	1	36	461348	461383	1.2e-12	Chromosome	37	78	4106330	4106371	5.3e-16
28654_74	TTTTCCCTGGTGTTGGCGCAGTATTCGCGCACCCCGGTCTGATTTGCGCCAACACCACGAAAAAAC	Chromosome	2	40	3350642	3350680	2e-14	Chromosome	39	60	504104	504125	5.5e-05
28920_66	CTGTGGGCACTCGAAGATACGGATAAACCTTAAAGAAGCGTTCTTTGAAGTGCTCACACAG	Chromosome	2	24	3941693	3941715	1.4e-05	Chromosome	27	61	4037072	4037106	2.9e-12
30210_40	GCTTGAGCAGCTGCAAAAACACCAGGGAAATACTTTCCCTGGTGTTGGCGCA	Chromosome	2	33	3933612	3933643	1e-10	Chromosome	34	52	3350642	3350660	0.0018
30684_35	GACAAGGAGGGGGTCGGCGGTTCGATCCCGTCATCACCCACAAGGAGGGGGTCGGCGGTTCGATCCCGTCATCACCCACCA	Chromosome	2	41	2520965	2521004	7.3e-15	Chromosome	40	81	781102	781143	5.6e-16
30905_33	GACAAGGAGGGGGTCGGCGGTTCGATCCCGTCATCACCGACAAGGAGGGGGTCGGCGGTTCGATCCCGTCATCACCCACCA	Chromosome	2	41	780799	780838	3.4e-13	Chromosome	40	81	2521085	2521126	5.6e-16
31016_32	GACGCGGGCGACTATAAATTCAAACACAAACGTCGTCCGCGCACGGACGCGGGCGACTATAAATTCAAACACAAACGTCGTCCGCGTGCGC	Chromosome	47	71	2891609	2891585	1.9e-06	Chromosome	71	90	1261298	1261279	0.0011
31114_31	CTATCACGATAAGCAGTAAGCCGGTCATAAACAGTAAGCCGGTCATAA	Chromosome	10	31	3946825	3946846	3.3e-05	Chromosome	28	48	228881	228901	0.0055
31057_32	TACAAGGAGGGGGTCGGCGGTTCGATCCCGTCATCACCCACAAGGAGGGGGTCGGCGGTTCGATCCCGTCATCACCCACCAG	Chromosome	1	41	2521206	2521246	2.1e-15	Chromosome	40	81	780799	780840	5.7e-16
31248_30	CGGAACGGCGTTCCAGGGGCAGATACCCTGGTAGTCCACGCCGTAAACGGCGTTCCAGGGGCAGATACCCTGGTAGTCCACGCCG	Chromosome	4	22	4442338	4442356	0.0037	Chromosome	21	49	4208936	4208964	1e-08
31718_27	GTCATCACCCTGGGGGGCACCATTGGACGTGTCCCAGGGCACACGGTCATCACCCTGGGGGGCACCATTGGACGTGTCCCAGGGCAACGTG	Chromosome	47	71	3980942	3980966	8.6e-05	Chromosome	71	91	453831	453811	0.00031
32286_24	GGGAGCGGTAGTTCAGTCGGTTAGAATACCTGCCTGTCACGGGGAGCGGTAGTTCAGTCGGTTAGAATACCTGCCTGTCACGG	Chromosome	2	41	228928	228967	7.5e-15	Chromosome	39	82	236927	236970	2.1e-15
32198_24	CGAGCCTGCGAAGGTGTGCTGTGAGGCATGCTGGAGGTATCGCGAGCCTGCGAAGGTGTGCTGTGAGGCATGCTGGAGGTATCAGAAGTGG	Chromosome	3	41	3425579	3425541	3.1e-14	Chromosome	45	90	3944908	3944953	3.9e-18
32389_23	CACAAGGAGGGGGTCGGCGGTTCGATCCCGTCATCACCCACAAGGAGGGGGTCGGCGGTTCGATCCCGTCATCACCCACCAG	Chromosome	2	41	2521085	2521124	7.4e-15	Chromosome	40	81	781102	781143	5.7e-16
32659_22	CGACTTCAATGAAGCGCGCAATGTCAGTGCGCTGTTCCTCGAAAGGGCAGGGGCGAGTGTAAATGCGTACACCCGCCCTGCTGCCCAGTG	Chromosome	2	68	3525663	3525583	3e-19	Chromosome	69	89	2533807	2533827	0.00031
32918_21	CTTCAGCAGTTGACAGTGGCATTTCATCCAGTTTGCCACCGGCTTCAGCAGTTGACAGTGGCATTTCATCCAGTTTGCCACCGTCCAGCTG	Chromosome	44	64	3845798	3845778	0.00031	Chromosome	65	91	1368567	1368541	6.7e-06
33641_19	GTCTGCCTGAACTGCTGAAAGAAATCACGGTCTGCCTGAACTGCTGAAAGA	Chromosome	3	25	254294	254272	0.00048	Chromosome	27	50	4449279	4449256	0.00013
33666_19	TACAAGGAGGGGGTCGGCGGTTCGATCCCGTCATCACCCACACGTACAAGGAGGGGGTCGGCGGTTCGATCCCGTCATCACCCACCAACG	Chromosome	1	41	780798	780838	2.3e-15	Chromosome	45	89	2520964	2521008	1.4e-17
33959_18	GCATCACGGTAAGCAGTAAGCCGGTCATAAGCAGTAAGCCGGTCATAA	Chromosome	10	30	3946825	3946845	0.00012	Chromosome	28	48	228881	228901	0.00012
34353_17	GCATCACGCATTAAGCAGTAAGCCGGTCATAAAGCAGTAAGCCGGTCATAAA	Chromosome	10	33	228879	228902	2.9e-06	Chromosome	32	52	3946826	3946846	0.00014
34899_16	TACAAGGAGGGGGTCGGCGGTTCGATCCCGTCATCACGCACAAGGAGGGGGTCGGCGGTTCGATCCCGTCATCACCCACCG	Chromosome	1	41	781101	781141	9.4e-14	Chromosome	40	80	2521085	2521125	2e-15
35407_15	GTTGTTTTGTTTGAACATCTGCTTCCTTTCTGCTTCTCCTGGAACCGCAAGGCCAGAGGAAAAGTTGTCAAGGATGAGCAGGGAGCAAAAC	Chromosome	2	42	1421526	1421486	1.1e-13	Chromosome	45	88	2924266	2924223	5.1e-17
36520_13	GAAGGAGGGGGTCGGCGGTTCGATCCCGTCATCACCCACCACACGGAAGGAGGGGGTCGGCGGTTCGATCCCGTCATCACCCACCACTTC	Chromosome	2	46	781104	781148	6.5e-16	Chromosome	47	90	2521209	2521252	5e-17
37160_12	CCGCTTCGGCGGGGTTTTTTAACTCTACTGCCCCGCCGAAAAAAC	Chromosome	1	20	3982822	3982841	0.00038	Chromosome	19	39	2240415	2240395	0.00011
37362_12	GAGTTCAGTCGGTAGAACGGCGGACTGTTTATCACGGAGTTCAGTCGGTAGAACGGCGGACTGTTAATCG	Chromosome	2	33	2059859	2059890	7.7e-09	Chromosome	38	69	2044557	2044588	1.7e-10
37535_12	GGTTAATCCGTATGTCACTGGTTCGAGTCCAGTCAGAGGAGCACGGGTTAATCCGTATGTCACTGGTTCGAGTCCAGTCAGAGGAGCCAG	Chromosome	2	42	2044582	2044622	2.3e-15	Chromosome	47	89	2062293	2062335	1.8e-16
37756_12	TTCAACGTGCGGGGGTTTTCTCATTAGCCCCCGTTCTGTTTTGATCACGTTCAACGTGCGGGGGTTTTCTCATTAGCCCCCGTTCTGTTG	Chromosome	2	25	1270439	1270462	0.00031	Chromosome	23	74	1269871	1269927	8.5e-05
37830_11	AGATAAGGGTGAGGTCGGTGGTTCAAGTCCACTCAGGCCTACACGAGATAAGGGTGAGGTCGGTGGTTCAAGTCCACTCAGGCCTACCAC	Chromosome	2	42	3427118	3427078	2.3e-15	Chromosome	47	89	4037175	4037217	1.8e-16
38607_11	TACCTACGGCACGCTGGACGATTCTGACGAAAAATTTTATAAGCGTCTGGTAAACAGCGTGCCGGGGCTGTCGG	Chromosome	2	31	4464484	4464455	1.1e-07	Chromosome	35	74	468740	468779	6.4e-15
38610_11	TACGCAGGGGGTCGCGGGTTCGAGTCCCGTCCGTTCCGCCACACGTACGCAGGGGGTCGCGGGTTCGAGTCCCGTCCGTTCCGCCACCCCG	Chromosome	2	42	236968	237008	2.4e-15	Chromosome	47	89	3946909	3946951	1.8e-16
38637_11	TATCGACACGGCGGATGTGAATCACTTCACACAAACAGCCGTATCGACACGGCGGATGTGAATCACTTCACACAAACAGCCGGTTCGGTC	Chromosome	2	41	223485	223524	8.4e-15	Chromosome	43	89	4207863	4207909	1.1e-18
38675_11	TCATCACGTCTCAACGTGCGGGGGTTTTCTCGACGTGCGGGGGTTTTCTC	Chromosome	9	31	1270437	1270459	9.9e-06	Chromosome	28	50	1269902	1269924	0.00046
39152_10	CCACTGCCTTTGGTAGAGGAAAGTGCTAAATAATAATCAATCACGCCACTGCCTTTGGTAGAGGAAAGTGCTAAATAATAATCAATTGTG	Chromosome	46	74	1299470	1299498	1.1e-08	Chromosome	71	89	1300694	1300712	0.004
39197_10	CGATAAGGGTGAGGTCGGTGGTTCAAGTCCACTCAGGCCTATCACGCGATAAGGGTGAGGTCGGTGGTTCAAGTCCACTCAGGCCTACCG	Chromosome	2	44	225415	225457	8.4e-15	Chromosome	48	89	4037175	4037216	6.5e-16
39840_10	GTTTCCCTGGTGTTGGCGCAGTATCCGCGCACCCCGGTCTCTCACCTTGAGCAGCTGCAAAAACACCAGGGAAACG	Chromosome	2	40	3350642	3350680	1.1e-12	Chromosome	41	74	3933607	3933640	1.4e-11
40121_10	TTGATCACATTCAACGTGCGGGGGTTTTCTCATTAGCCCCCGTTCTGTTG	Chromosome	11	34	1270439	1270462	0.00013	Chromosome	32	50	1269336	1269354	0.0017
40131_10	TTTCCCTGGTGTTGGCGCAGTATTCGCGCACCCCGGTCCCTTGATTTGCCCTTCTGTAGCCATCACCAGAG	Chromosome	1	38	3350642	3350679	7.8e-14	Chromosome	38	71	3888503	3888536	1.3e-11
40510_9	CCGCTTCGGCGGGGTTTTTTAACTCTACTGCCCCGCCGAAACACGCCGCTTCGGCGGGGTTTTTTAACTCTACTGCCCCGCCGAAAAAAC	Chromosome	1	20	3982822	3982841	0.0011	Chromosome	19	39	2240415	2240395	0.00031
40607_9	CTAATGCGAAGGTCGTAGGTTCGACTCCTGCTAATGCGAAGGTCGTAGGTTCGACTCCTATTATCGGCAG	Chromosome	2	29	297214	297241	2.8e-08	Chromosome	32	69	262906	262943	7.7e-14
40584_9	CGGGGCTACAGCTCAGCTGGGAGAGCGCCTGCTTTGCACGGCGGGGCTACAGCTCAGCTGGGAGAGCGCCTGCTTTGCACGCT	Chromosome	2	40	3427033	3426995	1.3e-12	Chromosome	43	82	4037260	4037299	3.5e-13
40843_9	GACGCAGGGGGTCGCGGGTTCGAGTCCCGTCCGTTCCGCCACACGGACGCAGGGGGTCGCGGGTTCGAGTCCCGTCCGTTCCGCCACCCCG	Chromosome	2	42	228965	229005	2.4e-15	Chromosome	47	89	3946909	3946951	1.8e-16
41291_9	TACAAGGAGGGGGTCGGCGGTTCGATCCCGTCATCACGTACAAGGAGGGGGTCGGCGGTTCGATCCCGTCAGCACCCACCG	Chromosome	1	37	781101	781137	3.4e-13	Chromosome	39	80	2521084	2521125	2.6e-14
41746_8	ATCCTCTGTAGTTCAGTCGGTAGAATGGCGGACTCCATCACGATCCTCTGTAGTTCAGTCGGTAGAATGGCGGACTG	Chromosome	2	34	2059851	2059883	2.5e-09	Chromosome	38	77	2058109	2058069	6.8e-10
41923_8	CACGCAGGGGGTCGCGGGTTCGAGTCCCGTCCGTTCCGCCAACGCACGCAGGGGGTCGCGGGTTCGAGTCCCGTCCGTTCCGCCACCCTG	Chromosome	1	41	228964	229004	2.3e-15	Chromosome	45	89	3946908	3946952	1.4e-17
42218_8	CGGGGCTATAGCTCAGCTGGGAGAGCGCCTGCTTTGCACGCGCGGGGCTATAGCTCAGCTGGGAGAGCGCCTGCTTTGCACGCAGGAGGC	Chromosome	2	41	4037260	4037299	8.4e-15	Chromosome	44	89	225500	225545	3.9e-18
42554_8	GAGCTGTACCAGGAACCACCTCCTTAGCCTGTGTACTGGTATCCTGGTACGACAACGG	Chromosome	2	35	2167141	2167174	9.7e-12	Chromosome	35	57	1863691	1863713	1.3e-05
42511_8	GACGCAGGGGGTCGCGGGTTCGAGTCCCGTCCGTTCCGCCAACGGACGCAGGGGGTCGCGGGTTCGAGTCCCGTCCGTTCCGCCACCCTG	Chromosome	2	41	228965	229004	8.4e-15	Chromosome	46	89	3946909	3946952	5e-17
42762_8	GCATCACGCATTAAGCAGTAAGCCGGTCATAAAGCAGTAAGCCGGTCATAA	Chromosome	10	33	3946823	3946846	2.8e-06	Chromosome	32	51	228882	228901	0.00048
42811_8	GCTCAACGTGCGGGGGTTTTCTCTTATTAGCCCCCGTTCTTCACGGCTCAACGTGCGGGGGTTTTCTCTTATTAGCCCCCGTTCTGTTAG	Chromosome	47	70	1270438	1270461	6.6e-06	Chromosome	71	88	1269336	1269353	0.014
43153_8	TACCTCCTTACCTTAAAGAAGCGTACTTTGCAGTGCTCACGTACCTCCTTACCTTAAAGAAGCGTACTTTGCAGTGCTCACACAG	Chromosome	2	40	2729624	2729586	2.8e-14	Chromosome	43	85	3427229	3427187	1.7e-16
43999_7	CACGCAGGGGGTCGCGGGTTCGAGTCCCGTCCGTTCCGCCACGCACGCAGGGGGTCGCGGGTTCGAGTCCCGTCCGTTCCGCCACCCTG	Chromosome	1	42	228964	229005	6.4e-16	Chromosome	44	88	3946908	3946952	1.4e-17
43995_7	CACCTCCTTACCTTAAAGAAGCGTACTTTGCAGTGCTCACGCACCTCCTTACCTTAAAGAAGCGTACTTTGCAGTGCTCACACAG	Chromosome	1	40	2729625	2729586	7.8e-15	Chromosome	42	85	3427230	3427187	4.6e-17
44385_7	CGGAACGGCGTTCCAGGGGCAGACACCCTGGTAGTCCACGCCGTGAACGGCGTTCCAGGGGCAGACACCCTGGTAGTCCACGCCG	Chromosome	4	22	4442338	4442356	0.0037	Chromosome	21	49	4208936	4208964	2.2e-05
44559_7	CTTCAGCAGTTGACAGTGGCATTTCATCCAGTTTGCCACTGTCCAGCTG	Chromosome	2	22	3845798	3845778	0.00012	Chromosome	23	49	1368567	1368541	5.7e-08
44620_7	CTTTTATGGCAGTGCCGAAAGGACTTACCGCCTTCGGCATTGCCGCGGG	Chromosome	1	24	2425573	2425550	2.7e-06	Chromosome	25	48	2424635	2424612	2.7e-06
44835_7	GAGCCGTACCAGGAACCACCTCCTTAGCCTGTGTACTGGTATCCTGGTACGACAACGA	Chromosome	2	35	2167141	2167174	4.5e-10	Chromosome	35	58	1863691	1863714	3.5e-06
45196_7	GGATAAGGGTGAGGTCGGTGGTTCAAGTCCACTCAGGCCTAACGGGATAAGGGTGAGGTCGGTGGTTCAAGTCCACTCAGGCCTACCAC	Chromosome	2	41	3427118	3427079	8.3e-15	Chromosome	46	88	4037175	4037217	1.8e-16
45417_7	GTGTGGGCACTCGAAGATACGGATTCTTCAAGACGAAAAATGAATACCAAAGAAGCGTACTTTGCAGTGCTCACACAG	Chromosome	1	50	223655	223711	8.9e-14	Chromosome	49	78	3427216	3427187	2.5e-09
45568_7	TACAAGGAGGGGGTCGGCGGTTCGATCCCGTCATCACCCACCACGTACAAGGAGGGGGTCGGCGGTTCGATCCCGTCATCACCCACCACGG	Chromosome	1	44	2521206	2521249	5.1e-17	Chromosome	46	89	781101	781144	5.1e-17
45778_7	TCTCAACGTGCGGGGGTTTTCTCTTAGCCCCCGTTCTGTTCTTATCACGTCTCAACGTGCGGGGGTTTTCTCTTAGCCCCCGTTCTGTTG	Chromosome	1	25	1270437	1270461	1.8e-06	Chromosome	24	74	1269872	1269926	3e-09
46122_6	AACAAGGAGGGGGTCGGCGGTTCGATCCCGTCATCACCCACACGAACAAGGAGGGGGTCGGCGGTTCGATCCCGTCATCACCCACCACTG	Chromosome	2	41	781102	781141	8.4e-15	Chromosome	46	89	2521085	2521128	5e-17
46634_6	CACGCACGCAGGGGGTCGCGGGTTCGAGTCCCGTCCGTTCCGCCACGCAGGGGGTCGCGGGTTCGAGTCCCGTCCGTTCCGCCA	Chromosome	5	46	3946908	3946949	5.9e-16	Chromosome	44	84	228964	229004	2.1e-15
46631_6	CACCTCCTTACCTTAAAGAAGCGTACTTTGCAGTGCTCACACACCTCCTTACCTTAAAGAAGCGTACTTTGCAGTGCTCACACAG	Chromosome	1	43	225303	225345	1.7e-16	Chromosome	42	85	2729625	2729582	4.6e-17
46905_6	CCACTGCCTTTGGTAGAGGAAAGTGCTAAATAATAATCAATACGCCACTGCCTTTGGTAGAGGAAAGTGCTAAATAATAATCAATTGTG	Chromosome	45	73	1299470	1299498	1.1e-08	Chromosome	70	88	1300694	1300712	0.0039
47145_6	CGCTGGAAAACATAACCCATAAAACGCTTATCACGCGCTGGAAAACATAACCCATAAAACGCC	Chromosome	1	28	2167113	2167140	5.2e-05	Chromosome	33	53	2004599	2004619	0.0086
47307_6	CTCTCGGAAGCGCTGGCGAAACTTACTGCCGGGCTTCCGTCATGTGCCGTTTGGCAACG	Chromosome	2	23	980248	980269	4.7e-05	Chromosome	23	57	3220100	3220134	2.8e-12
48535_6	GTCATCGCCCTGGGGGGCACCATTGGACGTGTCCCAGGGCACACGGTCATCGCCCTGGGGGGCACCATTGGACGTGTCCCAGGGCAACGCG	Chromosome	47	71	3980942	3980966	1.9e-06	Chromosome	71	89	453831	453813	0.004
48573_6	GTGTGGGCACTCGAAGATACGGATTCTTCGCAAGACGAAAAATGCCTTAAAGAAGCGTTCTTTGAAGTGCTCACACAG	Chromosome	1	44	223655	223703	1.5e-11	Chromosome	45	78	4037073	4037106	1.5e-11
48629_6	GTTGTTTTGTTTGAACATCTGCTTCCTTTCTGCTTCTTCTGAACCGCAAGGCCAGAGGAAAAGTTGTCAAGGATGAGCAGGGAGCAAAAC	Chromosome	2	41	1421526	1421487	8.4e-15	Chromosome	44	87	2924266	2924223	5e-17
48804_6	TACAAGGAGGGGGTCGGCGGTTCGATCCCGTCATCACGTACAAGGAGGGGGTCGGCGGTTCGATCCAGTCATCACCCACCG	Chromosome	1	37	2521084	2521120	3.4e-13	Chromosome	39	80	780798	780839	2.6e-14
48802_6	TACAAGGAGGGGGTCGGCGGTTCGATCCCGTCATCACCCACCACGTACAAGGAGGGGGTCGGCGGTTCGATCCCGTCATCACCCACCAG	Chromosome	1	44	2521206	2521249	4.9e-17	Chromosome	46	88	780798	780840	1.8e-16
48872_6	TAGGACACCGCCCTTTCACGGCGGTAACAGGGGTTCGAATCGTAGGACACCGCCCTTTCACGGCGGTAACAGGGGTTCGAATCCCCTAGC	Chromosome	2	41	4168393	4168432	8.4e-15	Chromosome	44	89	3943456	3943501	3.9e-18
49220_6	TGATAAGGGTGAGGTCGGTGGTTCAAGTCCACTCAGGCCTATCACGTGATAAGGGTGAGGTCGGTGGTTCAAGTCCACTCAGGCCTACCG	Chromosome	1	44	225414	225457	2.3e-15	Chromosome	47	89	4037174	4037216	1.8e-16
49242_6	TGCATCCGCAGCTCAGCTGGATAGAGTACTCGGCTGCGAACGTGCATCCGCAGCTCAGCTGGATAGAGTACTCGGCTGCGAACCGAGCGG	Chromosome	1	41	2818550	2818510	5e-12	Chromosome	43	90	2817861	2817814	6.5e-16
49353_6	TGTCATGCAGGGGGTCGCGGGTTCGAGTCCCGTCCGTTCCGGTGTCATGCAGGGGGTCGCGGGTTCGAGTCCCGTCCGTTCCGCCACCCC	Chromosome	1	41	228961	229001	1.1e-13	Chromosome	43	89	3946905	3946951	5e-17
49709_5	ACGTAAACGACAATGTTTATCTACGAACTTTAAGAACACTCAGGATAAACGACAATGTTTATCTACGAACTTTAAGAACACTCA	Chromosome	5	49	1434497	1434453	5.9e-16	Chromosome	47	84	1632799	1632836	4.6e-12
50228_5	CAATGCGCCCAGCGCCAGCTGTCTGCGTTGGGTGTGCGTAAGCAATGCGCCCAGCGCCAGCTGTCTGCGTTGGGTGTGCGTAATCTGGCGG	Chromosome	44	61	3563812	3563829	0.014	Chromosome	62	91	936423	936452	1.4e-07
50271_5	CACCTACGGCACGCTGGACGATTCTGACGAAAAATTTTATAAGCGTCTGGTAAACAGCGTGCCGGGGCTGTCGG	Chromosome	1	31	4464485	4464455	3e-08	Chromosome	35	74	468740	468779	6.4e-15
50276_5	CACCTTGAGCAGCTGCAAAAACACCAGGGAAATACCTTTCCCTGGTGTTGGCGCAGTATTCG	Chromosome	1	39	3933609	3933647	8.3e-13	Chromosome	37	62	3350642	3350667	3e-07
50642_5	CATTTGCTCTCTAAAAATCTGGATCAAGCATTTGCTCTCTAAAAATCTGGATCAAGC	Chromosome	2	29	3943581	3943608	9.5e-07	Chromosome	30	57	4168518	4168545	9.5e-07
50779_5	CCGCTTCGGCGGGGTTTTTTAACTCTACTGCCCCGCCGAATCACGCCGCTTCGGCGGGGTTTTTTAACTCTACTGCCCCGCCGAAAAAAC	Chromosome	1	20	3982822	3982841	0.0011	Chromosome	19	39	2240415	2240395	0.00031
50760_5	CCCTTAAAGAAGCGTACTTTGCAGTGCTCACACAGCCCTTAAAGAAGCGTACTTTGCAGTGCTCACACAG	Chromosome	2	35	3427220	3427187	1.3e-11	Chromosome	37	70	2729615	2729582	1.3e-11
51321_5	CTGTGGGCACTCGAAGATACGGATTCTTTCTTAACGTCGTAAGACCTTAAAGAAGCGTACTTTGTAGTGCTCACACAG	Chromosome	2	45	4035416	4035455	3.2e-08	Chromosome	44	78	4168200	4168234	4.2e-12
51606_5	GAAGAGTTGTTACTCATATGTGTGGGTTCCTGGTTTGGCTCTATAAAGAAAAACATAACCCATAAATGTTAGCTGTACCAGGAACCAAAAC	Chromosome	2	45	1423799	1423842	5.1e-17	Chromosome	48	87	2167117	2167157	8.6e-10
51576_5	GAACAGGAAGAAGCTTGCTTCTTTGCTGACGAGTGGCGGACGGAACAGGAAGAAGCTTGCTTCTTTGCTGACGAGTGGCGGACGGGTGG	Chromosome	2	43	223841	223882	6.4e-16	Chromosome	44	88	4166729	4166773	1.4e-17
51713_5	GACAGACCCTGACCATATTTTTGGTTCGTCAGGGTCTGATATCACGGACAGACCCTGACCATATTTTTGGTTCGTCAGGGTCTGGCGG	Chromosome	46	69	2057279	2057302	6.4e-06	Chromosome	70	87	1291775	1291792	0.014
51941_5	GATCACGTTCAACGTGCGGGGGTTTTCTCATTAGCCCCCGTTCTGTTG	Chromosome	9	32	1269904	1269927	0.00012	Chromosome	30	48	1269336	1269354	0.0015
53032_5	GTGTGGGCACTCGAAGATACGGATTCTCCTTAAAGAAGCGTTCTTTGCAGTGCTTACACAG	Chromosome	1	27	3428878	3428852	8.2e-08	Chromosome	28	61	3943350	3943383	4.9e-10
53031_5	GTGTGGGCACTCGAAGATACGGACCTTAAAGAAGCGTACTTTGCAGTGCTCACGCAG	Chromosome	1	23	4035415	4035437	1.2e-05	Chromosome	23	57	3427221	3427187	1.2e-10
53033_5	GTGTGGGCACTCGAAGATACGGATTCTTCTTAACGTCGCAAGACCCTTAAAGAAGCGTACTTTGCAGTGCTCACACAG	Chromosome	1	44	4166543	4166583	5.4e-11	Chromosome	45	78	225313	225346	1.5e-11
53390_5	TACGCAGGGGGTCGCGGGTTCGAGTCCCGTCCGTTCCGCTACACGTACGCAGGGGGTCGCGGGTTCGAGTCCCGTCCGTTCCGCTACCCTG	Chromosome	2	42	228965	229005	1.1e-13	Chromosome	47	90	3946909	3946952	2.4e-15
54173_5	TGGGGCTATAGCTCAGCTGGGAGAGCGCCTGCTTTGCACGTGGGGCTATAGCTCAGCTGGGAGAGCGCCTGCTTTGCACGCAGGC	Chromosome	1	40	3427034	3426995	7.8e-15	Chromosome	41	84	4037259	4037302	4.6e-17
55326_4	ATGGATAGTCATTTCGGCAAGGGTTCCTATCCCTGTCTCACGATGGATAGTCATTTCGGCAAGGGTTCCTATCCCTGTCTTCCCCCAC	Chromosome	37	70	1741257	1741290	8.2e-10	Chromosome	71	88	4106350	4106367	0.014
55475_4	CAACCACTCATTGGCGCGCTGTCGGATTTTACTGACCGACCGCAACCACTCATTGGCGCGCTGTCGGATTTTACTGACCGACAGCGGCAG	Chromosome	43	69	2724861	2724835	1.4e-07	Chromosome	70	89	3888876	3888895	0.0011
55474_4	CAACCACTCATTGGCGCGCTGTCGGATTTTACTGACCGACAGCAACCACTCATTGGCGCGCTGTCGGATTTTACTGACCGACAGCGGCAG	Chromosome	43	69	2724861	2724835	1.4e-07	Chromosome	70	89	3888876	3888895	0.0011
55476_4	CAACCACTCATTGGCGCGCTGTCGGATTTTACTGACCGACGCAACCACTCATTGGCGCGCTGTCGGATTTTACTGACCGACAGCGGCAG	Chromosome	42	68	2724861	2724835	1.4e-07	Chromosome	69	88	3888876	3888895	0.0011
55776_4	CACGCAAGGGGTCGCGGGTTCGAGTCCCGTCCGTTCCGCCACACGCACGCAAGGGGTCGCGGGTTCGAGTCCCGTCCGTTCCGCCACCCTG	Chromosome	1	42	228964	229005	3.1e-14	Chromosome	46	90	3946908	3946952	6.6e-16
55778_4	CACGCAGGGGGTTGCGGGTTCGAGTCCCGTCCGTTCCGCCACACGCACGCAGGGGGTTGCGGGTTCGAGTCCCGTCCGTTCCGCCACCCTG	Chromosome	1	42	236967	237008	3.1e-14	Chromosome	46	90	3946908	3946952	6.6e-16
55777_4	CACGCAGGGGGTCGCGGGTTCGAGTCCCGTCCGTTCCGCCACACGCACGCAGGGGGTCGCGGGTTCGAGTCCCGTCCGTTCCGCCACCCCG	Chromosome	1	42	236967	237008	6.6e-16	Chromosome	46	89	3946908	3946951	5.1e-17
55940_4	CAGCTGTACCAGGAACCACCTCCTTAGCCTGTGTAATCTCCCCTTACACGGGCTTGTTCAATGGGGAGATGGTTCGCTGGGAG	Chromosome	2	58	2167141	2167196	9.7e-19	Chromosome	56	82	3952513	3952539	1.3e-07
56493_4	CCGCTTCGGCGGGGTTTTTTAACTCTACTGCCCCGCCGAAAACGCCGCTTCGGCGGGGTTTTTTAACTCTACTGCCCCGCCGAAAAAAC	Chromosome	19	39	2240415	2240395	0.0003	Chromosome	41	64	3982818	3982841	0.0003
57172_4	CTACCGGAGAATGTTATCACGGGAGACAAACCGGGAGATACTCCCCGAAAGCTATTTAGGTAGCGCCTCGTGAACTCATCTCCGGGGGTG	Chromosome	2	28	2728266	2728240	1.4e-07	Chromosome	27	89	226549	226618	6.4e-21
57343_4	CTCCTCTGTAGTTCAGTCGGTTAATCCGTATGTCACTGGTTCGAGTCCAGTCAGAGGAGCCAG	Chromosome	2	21	2059851	2059870	0.00067	Chromosome	20	62	2058069	2058027	1.1e-16
57427_4	CTGAGGGCACTCGAAGATACGGATTCTTACCTTAAAGAAGCGTTCTTTGCAGTGCTCACACAG	Chromosome	2	29	3428877	3428850	1.1e-06	Chromosome	26	63	4209685	4209722	6.6e-14
57503_4	CTGTGGGCACTCGAAGATACGGATTCTTACCTTAAAGAAGCGTTCTTTGCAGTGCCCACACAG	Chromosome	2	29	4166544	4166571	2.4e-08	Chromosome	26	63	3943346	3943383	3.1e-12
57565_4	CTTCAGCAGTTGACAGTGGCATTTCATCCAGTTTGCCACGCTTCAGCAGTTGACAGTGGCATTTCATCCAGTTTGCCACTGTCCAGCTG	Chromosome	42	62	3845798	3845778	0.0003	Chromosome	63	89	1368567	1368541	1.4e-07
57962_4	GAAATTGCGGGTAAACCTTCGTCTGAAGTGGGCATGATCCATGCTCGCGGTACTTATTGACGGGGGCCCGCACAG	Chromosome	2	55	1822108	1822055	5e-21	Chromosome	56	74	4036449	4036467	0.0031
58040_4	GAAGAGTTGTTACTCATATGTGTGGGTTCCTGGTTTGGCTATAAAGAAAAACATAACCCATAAAATGTTAGCTGTACCAGGAACCAAAAC	Chromosome	2	46	1423799	1423843	3e-14	Chromosome	46	86	2167117	2167157	1.1e-13
58110_4	GAATATGAAATGTCCGGTTTGCCACCAGGGAGGAATTTTCCCTGGTGTTGGCGCAGTATTCGCGCACCCCGGTCC	Chromosome	2	36	3168249	3168215	1.8e-10	Chromosome	37	74	3350642	3350679	8.5e-14
58210_4	GACAAGGAGGGGGTCGGCAGTTCGATCCCGTCATCACGGACAAGGAGGGGGTCGGCAGTTCGATCCCGTCATCACCCACCA	Chromosome	2	37	780799	780834	5.7e-11	Chromosome	40	81	2521207	2521248	2.6e-14
59120_4	GATTGCTGTGTGTAGTCTTTGCCCATCTCCCACTCATCTTATTTTTGTCTGTCGCTTTAGACTATACACAGCATAA	Chromosome	2	33	1770431	1770462	1.9e-10	Chromosome	34	76	1216673	1216715	1.4e-16
59212_4	GCAATCACGCCACGCAGGGGGTCGCGGGTTCGAGTCCCGTCCGTTCCACGCAGGGGGTCGCGGGTTCGAGTCCCGTCCGTTCCGC	Chromosome	11	47	3946908	3946944	3.6e-13	Chromosome	47	85	236967	237005	2.8e-14
59600_4	GGATAAGGGTGAGGTCGGTGGTTCAAGTCCACTCAGGCCTACACGGGATAAGGGTGAGGTCGGTGGTTCAAGTCCACTCAGGCCTACCAC	Chromosome	2	42	3427118	3427078	2.3e-15	Chromosome	47	89	225415	225457	1.8e-16
60131_4	GGTTAATCCGTATGTCACTGGTTCGAGTCCAGTCAGAGGAGACGGGTTAATCCGTATGTCACTGGTTCGAGTCCAGTCAGAGGAGCCAG	Chromosome	2	41	2059884	2059923	8.3e-15	Chromosome	46	88	2062293	2062335	1.8e-16
60190_4	GTAATCCGTATGTCACTGGTTCGAGTCCAGTCAGAGGAGCACGGTAATCCGTATGTCACTGGTTCGAGTCCAGTCAGAGGAGCCAG	Chromosome	2	40	2044584	2044622	2.8e-14	Chromosome	45	85	2058067	2058027	2.2e-15
60369_4	GTGTGGGCACTCGAAGACACGGATTCTCCTTAAAGAAGCGTTCTTTGCAGTGCTCACACAG	Chromosome	1	27	223655	223681	3.8e-06	Chromosome	28	61	4209689	4209722	1e-11
60341_4	GTGATATGTAGGTGAAGCGACTTGCTCGTGGAGCTGAAATATCACGGTGATATGTAGGTGAAGCGACTTGCTCGTGGAGCTGAAATCAGC	Chromosome	2	40	3945412	3945450	3e-14	Chromosome	43	89	3425080	3425034	5e-17
60370_4	GTGTGGGCACTCGAAGATACGGATTCTTAAGACGAAAAATGAATACCAAAGAAGCGTACTTTGCAGTGCTCACACAG	Chromosome	1	49	3428878	3428822	1.1e-12	Chromosome	48	77	225317	225346	2.5e-09
60898_4	TACAAGGAGGGGGTCGGCGGTTCGATCCCGTCATCACGTACAAGGAGGGGGTCGGCGGTTCGAACCCGTCATCACCCACCG	Chromosome	1	37	781101	781137	3.4e-13	Chromosome	39	80	2521206	2521247	2.6e-14
60897_4	TACAAGGAGGGGGTCGGCGGTTCGATCCCGTCATCACCCATCACGTACAAGGAGGGGGTCGGCGGTTCGATCCCGTCATCACCCATCAACG	Chromosome	1	44	780798	780841	2.4e-15	Chromosome	46	90	2520964	2521008	6.6e-16
60961_4	TACGCAGGGGGTCGCGGGTTCGAGTCCCGTCCGTTCCGCCACGTACGCAGGGGGTCGCGGGTTCGAGTCCCGTCCGTTCCGCCACCCTG	Chromosome	2	42	236968	237008	2.3e-15	Chromosome	45	88	3946909	3946952	4.9e-17
60944_4	TACCTCCTTACCTTAAAGAAGCGTACTTTGCAGTGATCACGTACCTCCTTACCTTAAAGAAGCGTACTTTGCAGTGCTCACACAG	Chromosome	2	40	225304	225342	1.3e-12	Chromosome	43	85	2729624	2729582	1.7e-16
60945_4	TACCTCCTTACCTTAAAGAAGCGTACTTTGCAGTGCTCACATACCTCCTTACCTTAAAGAAGCGTACTTTGCAGTGCTCACACAG	Chromosome	2	41	3427229	3427190	7.8e-15	Chromosome	43	85	2729624	2729582	1.7e-16
62419_4	TTGTGGGCACTCGAAGATACGGATTCTTAACCCTTAAAGAAGTGTACTTTGCAGTGCTCACACAG	Chromosome	2	31	3941693	3941722	1.9e-09	Chromosome	32	65	2729615	2729582	5.4e-10
62538_4	TTTTGCCTGGCGGCCGTAGCGCGGTGGTCCCACCTGACATGGTAGTGTGGGGTCTCCCCATGCGAGAGTAGGGAACTGCCAGGCATCC	Chromosome	2	38	228754	228790	3.8e-13	Chromosome	39	87	3423715	3423667	8.1e-20
62539_4	TTTTGCCTGGCGGCCGTAGCGCGGTGGTCCCACCTGACCCATGGTAGTGTGGGGTCTCCCCATGCGAGAGTAGGGAACTGCCAGGCATCC	Chromosome	2	40	228754	228792	3e-14	Chromosome	38	89	2726119	2726068	8.3e-20
63305_3	ACGACGCGCTTCCGATCTGCTATCACGATAAGCAGTAAGCCGGTCATAAGCAGTAAGCCGGTCATAA	Chromosome	29	49	228881	228901	0.0002	Chromosome	47	67	3946825	3946845	0.0002
63322_3	ACGGATAGTCATTTCGGCAAGGGTTCCTATCCCTGTCTTCCCACGACGGATAGTCATTTCGGCAAGGGTTCCTATCCCTGTCTTCCCCCAC	Chromosome	48	73	1741265	1741290	5.2e-07	Chromosome	74	91	4106350	4106367	0.014
63920_3	ATCGCCATCATCATCCCGGCATCATAATCGCCATCATCATCCCGG	Chromosome	1	18	4464839	4464822	0.0049	Chromosome	20	41	120919	120940	0.0014
64372_3	ATGGATAGTCATTTCGGCAAGGGTTCCTATCCCTGTCTTCCCCCAC	Chromosome	1	28	1741263	1741290	1.4e-08	Chromosome	29	46	4106350	4106367	0.0051
64373_3	ATGGATAGTCATTTCGGCAAGGGTTCCTATCCCTGTCTTCCCGCGATGGATAGTCATTTCGGCAAGGGTTCCTATCCCTGTCTTCCCCCAC	Chromosome	46	73	1741263	1741290	4e-08	Chromosome	74	91	4106350	4106367	0.014
64729_3	CAACCACTCATTGGCGCGCTGTCGGATTTTACTGACCGACAGCGGCAG	Chromosome	1	27	2724861	2724835	5.5e-08	Chromosome	28	47	3888876	3888895	0.00043
64826_3	CAAGCCTGCGAAGGTGTGCTGTGAGGCATGCTGGAGGTATGCAAGCCTGCGAAGGTGTGCTGTGAGGCATGCTGGAGGTATCAGAAGTGG	Chromosome	2	40	4211246	4211284	3e-14	Chromosome	40	89	3425583	3425534	1.1e-18
65300_3	CACGCTGGGGCTGGTGGCGATAATTTCAGTTACCACGCACGCTGGGGCTGGTGGCGATAATTTCAGTTACCAGCCCGGCGGTG	Chromosome	39	57	3300638	3300620	0.0036	Chromosome	61	82	2822087	2822066	7.6e-05
65231_3	CACCTCCTTACCTTAAAGAAGCGTACTTTGCAGTGATCACGCACCTCCTTACCTTAAAGAAGCGTACTTTGCAGTGCTCACACAG	Chromosome	1	43	225303	225345	3.6e-13	Chromosome	42	85	3427230	3427187	4.6e-17
66484_3	CATTGCTGTGTGTAGTCTTTGCCCATCCCCCAGGGCTGATTTATTACTACACACAGCAGTGCAG	Chromosome	2	32	1770431	1770461	2.4e-08	Chromosome	32	63	1103308	1103277	1.5e-10
66970_3	CCGCTTCGGCGGGGTTTTTTAACTCTACTGCCCCGCCGAAACGCCGCTTCGGCGGGGTTTTTTAACTCTACTGCCCCGCCGAAAAAAC	Chromosome	19	39	2240415	2240395	0.0003	Chromosome	40	63	3982818	3982841	0.0003
67398_3	CGATAAGGGTGAGGTCGGTGGTTCAAGTCCACTCAGGCCTAACGCGATAAGGGTGAGGTCGGTGGTTCAAGTCCACTCAGGCCTACCG	Chromosome	2	41	225415	225454	8.1e-15	Chromosome	46	87	3427118	3427077	6.3e-16
68457_3	CTATCACGATTAGCAGTAAGCCGGTCATAAGCAGTAAGCCGGTCATAA	Chromosome	12	30	3946827	3946845	0.0015	Chromosome	28	48	228881	228901	0.00012
68995_3	CTGTGGGCACACGAAGATACGGATTCTTCTTTAAAGAAGCGTACTTTGCAGTGCTCACAC	Chromosome	2	28	3428877	3428851	3.7e-06	Chromosome	31	60	2729613	2729584	1.7e-09
69965_3	GAACGGCGTTCCAGGGGCAGATACCCTGGTAGTCCACGCCGTAAACGG	Chromosome	2	20	4442338	4442356	0.0015	Chromosome	19	47	4036320	4036348	4.2e-09
70190_3	GAATATGAAATGTCCGGTTTGCCACCAGGGAGAAACTTTCCCTGGTGTTGGCGCAGTATTCGCGCACCCCGGTCC	Chromosome	2	35	3168249	3168216	1.4e-11	Chromosome	37	74	3350642	3350679	8.5e-14
70364_3	GAATTGGTCTGCGATTCAGACCATGGTAGCAAAGCTACCTTGTACATTTACCCTGTCTGTCCATAGTGAACGGATATGACAGGGTGAGAAG	Chromosome	2	69	2942786	2942865	6.5e-21	Chromosome	70	88	2946056	2946038	0.004
72458_3	GATTGCTGTGTGTAGTCTTTGCCCATCTCCCATTCATCTTATTTTTGTCTGTCGCTTTAGACTATACACAGCATAG	Chromosome	2	32	1770431	1770461	6.7e-10	Chromosome	31	75	1216670	1216714	1.1e-17
73192_3	GCTCATCAGCAGTGTAAAAGGCACATCACGGCTCATCAGCAGTGTAAAAGGCT	Chromosome	5	23	4250448	4250466	0.0018	Chromosome	23	40	2468701	2468684	0.0066
74866_3	GTCATCGCCCTGGGGGGCACCATTGGACGTGTCCCAGGGCAACGGTCATCGCCCTGGGGGGCACCATTGGACGTGTCCCAGGGCAACGTG	Chromosome	46	70	3980942	3980966	1.8e-06	Chromosome	70	90	453831	453811	0.00031
74989_3	GTGATATGTAGGTGAAGCGACTTGCTCGTGGAGCTGAAAATCACGGTGATATGTAGGTGAAGCGACTTGCTCGTGGAGCTGAAATCAGC	Chromosome	2	39	4039226	4039263	1.1e-13	Chromosome	42	88	3425080	3425034	4.9e-17
75068_3	GTGTGGGCACTCGAAGATACGGATTCTTAACCCTTAAAGAGGCGTTCTTTGAAGTGCTCACACAG	Chromosome	1	31	4208031	4208061	5.4e-10	Chromosome	32	65	4037073	4037106	5.4e-10
75067_3	GTGTGGGCACTCGAAGATACGGATTCCTTAAAGAAGTGTACTTTGCAGTGCTCACACAG	Chromosome	1	26	3428878	3428853	2.8e-07	Chromosome	26	59	225313	225346	4.6e-10
75072_3	GTGTGGGCACTCGAAGATACGGATTCTTGCAAGACGAAAAATGCCTTAAAGAAGCGTTCTTTGAAGTGCTCACACAG	Chromosome	1	43	4035415	4035463	1.9e-10	Chromosome	44	77	4037073	4037106	1.5e-11
75066_3	GTGTGGGCACTCGAAGACACGGATTCTTAACGTCGCAAGACGAAAAATGCCTTAAAGAAGCGTTCTTTGAAGTGCTCACACAG	Chromosome	1	49	4035415	4035463	3.5e-18	Chromosome	50	83	4037073	4037106	1.6e-11
75069_3	GTGTGGGCACTCGAAGATACGGATTCTTAACGTCGCAAGACGAAAAATGAATACCAAAGAAGCGTACTTTGCAGTGCTCGCACAG	Chromosome	1	57	3941692	3941748	2.8e-24	Chromosome	56	85	2729611	2729582	1.3e-07
75118_3	GTTAATCCGTATGTCACTGGTTCGAGTCCAGTCAGAGGATCACGGTTAATCCGTATGTCACTGGTTCGAGTCCAGTCAGAGGAGCCAG	Chromosome	1	39	2062293	2062331	2.9e-14	Chromosome	42	87	2058072	2058027	1.7e-16
75316_3	GTTGCGGTGTGTAGTCTTTGCCCATCTCCCTTTATTACTACACACAGCAGTG	Chromosome	2	30	1770432	1770460	2.3e-07	Chromosome	31	52	1103300	1103279	3.8e-05
75858_3	TAACCCGAAGATCGTCGGTTCAAATCCGGCCCCCGCAACCAATCACGTAACCCGAAGATCGTCGGTTCAAATCCGGCCCCCGCAACCAG	Chromosome	1	45	2947533	2947577	6.4e-16	Chromosome	48	88	3318253	3318213	2.3e-15
76097_3	TACAAGGAGGGGGCCGGCGGTTCGATCCCGTCATCACGTACAAGGAGGGGGCCGGCGGTTCGATCCCGTCATCACCCACCG	Chromosome	1	37	2521206	2521242	1.6e-11	Chromosome	39	80	780798	780839	2.6e-14
76102_3	TACAAGGAGGGGGTCGGCGGTTCGATCCCGTCATCACGTACAAGGAGGGGGTCGGCGGTTTGATCCCGTCATCAACCACCG	Chromosome	1	37	781101	781137	3.4e-13	Chromosome	39	80	2520964	2521005	1.2e-12
76100_3	TACAAGGAGGGGGTCGGCGGTTCGATCCCGTCATCACGCACAAGGAGGGGGTCGGCGGTTCGATCCAGTCATCACCCACCG	Chromosome	1	41	2520964	2521004	9.4e-14	Chromosome	40	80	780799	780839	9.4e-14
76098_3	TACAAGGAGGGGGTCGGCGGTTCGATCCCGTCATCACCCACAAGGAGGGGGTCGGCGGTTCGATACCGTCATCACCCACCAG	Chromosome	1	41	2521084	2521124	2.1e-15	Chromosome	40	81	781102	781143	2.7e-14
76096_3	TACAAGGAGAGGGTCGGCGGTTCGATCCCGTCATCACCCACCACGTACAAGGAGGGGGTCGGCGGTTCGATCCCGTCATCACCCACCACTG	Chromosome	1	44	780798	780841	2.4e-15	Chromosome	46	90	2521206	2521250	1.4e-17
76099_3	TACAAGGAGGGGGTCGGCGGTTCGATCCCGTCATCACCCATCACGTACAAGGAGGGGGTCGGCGGTTCGATCCCGTCATCACCCACCAG	Chromosome	1	44	780798	780841	2.3e-15	Chromosome	46	88	2520964	2521006	1.8e-16
76649_3	TATCACGTCTCAACGTGCGGGGGTTTTCTCTTAGCCCCCGTTCTGTTG	Chromosome	8	32	1270437	1270461	7.1e-07	Chromosome	31	48	1269337	1269354	0.0055
76887_3	TATTCACTAAGGCAGGAAATCCATCACGTATTCACTATGGCAGGAAATG	Chromosome	13	30	2648505	2648522	0.0057	Chromosome	30	48	4264307	4264325	0.0016
78070_3	TGATAAGGGTGAGGTCGGTGGTTCAAGTCCACCCAGGCCTATCACGTGATAAGGGTGAGGTCGGTGGTTCAAGTCCACCCAGGCCTACCAG	Chromosome	1	44	225414	225457	1.1e-13	Chromosome	47	90	3427119	3427076	2.4e-15
79033_3	TTATCACGTCTCAACGTGCGGGGGTTTTCTCTTAGCCCCCGTTCTGTTG	Chromosome	9	33	1270437	1270461	7.4e-07	Chromosome	32	49	1269337	1269354	0.0057
79364_3	TTTCCCTGGTGTTGGCGCAGTATTCGCGCACCCCGGTCTCTTGATTTGCCCTACTGTAGCCATCACCAGAG	Chromosome	1	39	3350642	3350680	2.2e-14	Chromosome	40	71	3888505	3888536	7.9e-09
79365_3	TTTCCCTGGTGTTGGCGCAGTATTCGCGCACCCCGGTCTCTTGATTTGCCCTTCTGTAGCCATAACCAGAG	Chromosome	1	39	3350642	3350680	2.2e-14	Chromosome	40	71	3888505	3888536	7.9e-09
79894_2	AAAGGAGGGGGTCGGCGGTTCGATCCCGCCATCACCCACCACTATCACGAAAGGAGGGGGTCGGCGGTTCGATCCCGCCATCACCCACCAC	Chromosome	2	49	2521087	2521134	3.1e-14	Chromosome	51	91	780801	780841	1.1e-13
79895_2	AAAGGAGGGGGTCGGCGGTTCGATCCCGTCACCACCCACCACTATCACGAAAGGAGGGGGTCGGCGGTTCGATCCCGTCACCACCCACCAC	Chromosome	2	49	2521087	2521134	3.1e-14	Chromosome	51	91	781104	781144	1.1e-13
79900_2	AAAGGAGGGGGTCGGCGGTTCGATCTCGTCATCACCCACCACTATCACGAAAGGAGGGGGTCGGCGGTTCGATCTCGTCATCACCCACCAC	Chromosome	2	49	2521087	2521134	3.1e-14	Chromosome	51	91	780801	780841	1.1e-13
79896_2	AAAGGAGGGGGTCGGCGGTTCGATCCCGTCATCACCCACCAACGAAAGGAGGGGGTCGGCGGTTCGATCCCGTCATCACCCACCAC	Chromosome	2	43	2520967	2521008	6.1e-16	Chromosome	46	86	781104	781144	2.2e-15
80217_2	AACAAGGAGGGGGTCGGCGGTTCGATCCCGTCATCACCACGAACAAGGAGGGGGTCGGCGGTTCGATCCCGTCATCACCCACCACTA	Chromosome	2	38	780799	780835	3.7e-13	Chromosome	43	86	2521085	2521128	4.8e-17
80215_2	AACAAGGAGGGGGTCAGCGGTTCGATCCCGTCATCACCCACCACGAACAAGGAGGGGGTCAGCGGTTCGATCCCGTCATCACCCACCACTA	Chromosome	2	44	780799	780841	8.5e-15	Chromosome	47	90	2521207	2521250	2.4e-15
80216_2	AACAAGGAGGGGGTCGGCGGTTCGATCCCGTCACCACCCACCACGAACAAGGAGGGGGTCGGCGGTTCGATCCCGTCACCACCCACCACTA	Chromosome	2	44	781102	781144	8.5e-15	Chromosome	47	90	2521207	2521250	2.4e-15
80472_2	AACTTAAACGTATCGTTCATCATCACGAACTTAAACGTATCGTTCAG	Chromosome	9	26	1827093	1827110	0.0053	Chromosome	29	47	106574	106592	0.0015
81624_2	ACAAGATCGCTGCAGGGGCTGATAAGAAGCCCCTGCGCACTATCACGACAAGATCGCTGCAGGGGCTGATAAGAAGCCCCTGCGCACTCGG	Chromosome	21	41	3450448	3450428	0.014	Chromosome	46	71	461471	461496	2.4e-05
82123_2	ACGCAGGGGGTCGCGGGTTCGAGTCCCGTCCGTTCCGCCGACGCAGGGGGTCGCGGGTTCGAGTCCCGTCCGTTCCGCCAG	Chromosome	1	39	236968	237006	2.6e-14	Chromosome	41	80	3946909	3946948	7.3e-15
84009_2	ATCCTCTGTAGTTCAGTCGGTAGAACGGCGGACCCCATCACGATCCTCTGTAGTTCAGTCGGTAGAACGGCGGACCG	Chromosome	2	33	2059851	2059882	1.9e-10	Chromosome	38	75	2058109	2058071	1.9e-10
87012_2	CAAGTCGAACGGTAACAGGAAGTAGCTTGCGTATCACGCAAGTCGAACGGTAACAGGAAGTAGCTTGCG	Chromosome	1	30	4035588	4035617	9.8e-08	Chromosome	35	68	2731104	2731071	2.7e-08
88501_2	CACGCAGGGGGTCACGGGTTCGAGTCCCGTCCGTTCCGCCACACGCACGCAGGGGGTCACGGGTTCGAGTCCCGTCCGTTCCGCCACCCTG	Chromosome	1	42	228964	229005	3.1e-14	Chromosome	46	90	3946908	3946952	6.6e-16
88530_2	CACGCCGAAGGTGTTTTGGCGGATTGAGAGAAGATTTCCAGGCACGCCGAAGGTGTTTTGGCGGATTGAGAGAAGATTTCCAGC	Chromosome	2	41	4212950	4212989	3.6e-13	Chromosome	44	84	4040427	4040467	9.9e-14
88531_2	CACGCCGAAGGTGTTTTGGCGGATTGAGAGAAGATTTTCAGCACGCCGAAGGTGTTTTGGCGGATTGAGAGAAGATTTTCAGC	Chromosome	2	42	4040427	4040467	2.1e-15	Chromosome	43	83	4212950	4212990	2.1e-15
88706_2	CACGTTCAACGTGCGGGGGTTTTCTCATTAGCCCCCGTTCTGTTG	Chromosome	6	29	1270439	1270462	0.00011	Chromosome	27	45	1269336	1269354	0.0014
89249_2	CAGAACGGCGGACTGTTAATCGCAGAACGGCGGACTGTTAATCG	Chromosome	2	21	2059871	2059890	0.00036	Chromosome	24	43	2062280	2062299	0.00036
90997_2	CATCACGTCAAGGTCGGGGTCGCGAGTTCGAGTCTCGTTTCCCGCTCAAGGTCGGGGTCGCGAGTTCGAGTCTCGTTTCCCGCTC	Chromosome	9	47	4392507	4392545	2.8e-14	Chromosome	47	85	1992082	1992044	2.8e-14
93660_2	CCACTGCCTTTGGTAGAGGAAAGTGCTAAATAATAATCAATTGTG	Chromosome	1	29	1299470	1299498	3.8e-09	Chromosome	26	44	1300694	1300712	0.0014
93661_2	CCACTGCCTTTGGTAGAGGAAAGTGCTAAATAATAATCATCACGCCACTGCCTTTGGTAGAGGAAAGTGCTAAATAATAATCAATTGTG	Chromosome	45	73	1299470	1299498	1.1e-08	Chromosome	70	88	1300694	1300712	0.0039
94808_2	CCTAACTCACCAGCTGAAATCAATCACGCCTAACTCACCAGCTGAAATG	Chromosome	13	30	3747687	3747704	0.0057	Chromosome	31	48	89167	89184	0.0057
95520_2	CCTTAAAGAAGCGTACTTTGCAGTGCTCACACATATCACGCCTTAAAGAAGCGTACTTTGCAGTGCTCACACG	Chromosome	1	36	225313	225348	4.9e-11	Chromosome	41	72	3427220	3427189	1.8e-10
95618_2	CCTTCAGCGCGTCGTCAATCTGACTGATCACGCCTTCAGCGCGTAGTCAATCTGACG	Chromosome	2	24	4459765	4459743	1.2e-05	Chromosome	23	40	2553173	2553156	0.0074
96129_2	CGACTTCAATGAAGCACGCAATGTCAGTGCGCTGTTCCTCGGAAAGGGCAGGGGCGAGTGTAAATGCGTACACCCGCCCTGCTGCCCAGTG	Chromosome	2	69	3525663	3525583	1.1e-18	Chromosome	70	90	2533807	2533827	0.00031
96132_2	CGACTTCAATGAAGCGCGCAATGTCAGTGCGCTGTTCCTCGGAAAGGGCAGAGGCGAGTGTAAATGCGTACACCCGCCCTGCTGCCCAGTG	Chromosome	2	69	3525663	3525583	1.1e-18	Chromosome	70	90	2533807	2533827	0.00031
96133_2	CGACTTCAATGAAGCGCGCAATGTCAGTGCGCTGTTCCTCGGAAAGGGCAGGGGCGTGTGTAAATGCGTACACCCGCCCTGCTGCCCAGTG	Chromosome	2	69	3525663	3525583	1.1e-18	Chromosome	70	90	2533807	2533827	0.00031
96130_2	CGACTTCAATGAAGCGCGCAATGTCAGTGCACTGTTCCTCGGAAAGGGCAGGGGCGAGTGTAAATGCGTACACCCGCCCTGCTGCCCAGTG	Chromosome	2	69	3525663	3525583	1.1e-18	Chromosome	70	90	2533807	2533827	0.00031
96131_2	CGACTTCAATGAAGCGCGCAATGTCAGTGCGCTGGAAAGGGCAGGGGCGAGTGTAAATGCGTACACCCGCCCTGCTGCCCAGTG	Chromosome	2	62	3525663	3525583	1.3e-12	Chromosome	63	83	2533807	2533827	0.00028
98135_2	CGGAACGGCGTTCCAGGGGCAGACACCCTGGTAGTCCACGCCGTAAACGGCGTTCCAGGGGCAGACACCCTGGTAGTCCACGCCG	Chromosome	4	22	4442338	4442356	0.0037	Chromosome	21	49	4167448	4167476	4.7e-07
98137_2	CGGAACGGCGTTCCAGGGGCAGATACCCTGGTAGTCCCCGCCGTGAACGGCGTTCCAGGGGCAGATACCCTGGTAGTCCCCGCCG	Chromosome	4	22	4442338	4442356	0.0037	Chromosome	21	49	224560	224588	2.2e-05
98136_2	CGGAACGGCGTTCCAGGGGCAGATACCCTGGTAGTCCACGCCGTGAACGGCGTTCCAGGGGCAGATACCCTGGTAGTCCACGCC	Chromosome	4	22	4442338	4442356	0.0036	Chromosome	21	49	224560	224588	4.6e-07
98274_2	CGGCTTCAGTATTCCTGAGTACCGTAAACCCTGTCAGGGAATGTTGTCTGCTACTCAACCAATTGAGTAGTAGCAACTCACGTTCCCAGAC	Chromosome	2	64	194853	194929	2.4e-15	Chromosome	62	89	4106290	4106317	4e-08
98299_2	CGGGGCTACAGCTCAGCTGGGGGAGCGCCTGCTTTGCACGCGCGGGGCTACAGCTCAGCTGGGGGAGCGCCTGCTTTGCACGCT	Chromosome	2	41	3427033	3426994	1.7e-11	Chromosome	44	83	225500	225539	1.7e-11
98301_2	CGGGGCTATAGCTCAGCTGGGAGAGCGCCTGCTTTGCACCGCGGGGCTATAGCTCAGCTGGGAGAGCGCCTGCTTTGCACGCAGGAGGC	Chromosome	2	39	3427033	3426996	1.1e-13	Chromosome	43	88	225500	225545	3.8e-18
99072_2	CTAATCACGGATTTACCCTGTCTGTCCATAGACGTTTTTACGGATATGACAGGGTGAGC	Chromosome	11	31	2942842	2942862	0.00017	Chromosome	33	58	2946063	2946038	2.8e-07
99083_2	CTAATCCGTATGTCACTGGTTCGAGTCCAGTCAGAGGAGCCACGCTAATCCGTATGTCACTGGTTCGAGTCCAGTCAGAGGAGCCAG	Chromosome	2	42	2059886	2059926	2.2e-15	Chromosome	46	86	2058067	2058027	2.2e-15
99144_2	CTACCGGAGAATGTTATCACGGGAGACAAACCGGGAAATAGCTCCCCGAAAGCTATTTAGGTAGCGCCTCGTGAACTCATCCCCGGGGGTG	Chromosome	2	28	3425865	3425839	1.4e-07	Chromosome	27	90	226549	226618	1.1e-18
99325_2	CTATCACGCATTAAGCAGTAAGCCGGTCATAAAACAGTAAGCCGGTCATAAAA	Chromosome	10	35	228879	228904	2.3e-07	Chromosome	35	53	3946829	3946847	0.0018
100900_2	CTGTGGGCACTCGAAGATACGAAACCCTTAAGGAAGCGTACTTTGTAGTGCTCACACAG	Chromosome	2	21	3941693	3941712	0.0006	Chromosome	26	59	4168201	4168234	4.6e-10
100901_2	CTGTGGGCACTCGAAGATACGAAGCCCTTAAAGAAGCGTACTTTGTAGTGCTCACACAG	Chromosome	2	21	3941693	3941712	0.0006	Chromosome	26	59	4168201	4168234	9.9e-12
100911_2	CTGTGGGCACTCGAAGATACGGATTCTTCCTCCTTACCTTAACGAAGCGTTCTTTGCAGTGCTCACACAG	Chromosome	2	28	4166544	4166570	1e-07	Chromosome	29	70	4209681	4209722	2.1e-14
100902_2	CTGTGGGCACTCGAAGATACGGATTCCTAAAGAAGCGTACTTTGCAGTGCTCACACAG	Chromosome	2	30	223656	223684	2.7e-07	Chromosome	28	58	225316	225346	4.5e-10
100912_2	CTGTGGGCACTCGAAGATACGGATTCTTCTTTAAAGAAGCGTACTTTGCAGTGCTAACAC	Chromosome	2	28	4035416	4035442	8e-08	Chromosome	31	60	2729613	2729584	8e-08
100908_2	CTGTGGGCACTCGAAGATACGGATTCTTACCTTAAAGGAGCGTTCTTTGCAGTGCTCACACAG	Chromosome	2	29	4208032	4208059	2.4e-08	Chromosome	26	63	4209685	4209722	3.1e-12
100907_2	CTGTGGGCACTCGAAGATACGGATTCTTAACGTCGCCTTAAAGAAGCGAACTTTGCAGTGCTCACACAG	Chromosome	2	36	223656	223690	3.5e-12	Chromosome	36	69	2729615	2729582	5.9e-10
100906_2	CTGTGGGCACTCGAAGATACGGATTCTTAACGTCACCTTAAAGAAGCGTACTTTGCAGTGCTCACACAG	Chromosome	2	34	4166544	4166576	4.5e-11	Chromosome	35	69	225312	225346	3.5e-12
100909_2	CTGTGGGCACTCGAAGATACGGATTCTTCCTCCTTACCTTAAAGAAGCGTTCTTTGCAGTGCCCACACAG	Chromosome	2	28	4166544	4166570	1e-07	Chromosome	29	70	3943342	3943383	2.1e-14
100910_2	CTGTGGGCACTCGAAGATACGGATTCTTCCTCCTTACCTTAAAGAAGCGTTCTTTGCAGTGCTAACACAG	Chromosome	2	28	4035416	4035442	1e-07	Chromosome	29	70	3943342	3943383	2.1e-14
100914_2	CTGTGGGCACTCGAGGATACGGATTCTTAACGTCCTTAAAGAAGCGTACTTTGCAGTGCTCACACAG	Chromosome	2	34	4166544	4166576	2e-09	Chromosome	34	67	2729615	2729582	1.2e-11
101417_2	CTTCAGCAGTTGACAGTGGCATTTCATCCAGTTTGCCACTGACCAGCTG	Chromosome	2	22	3845798	3845778	0.00012	Chromosome	23	49	1368567	1368541	2.7e-06
101419_2	CTTCAGCAGTTGACAGTGGCGTTTCATCCAGTTTGCCACTGTCCAGCTG	Chromosome	2	20	3845798	3845780	0.0016	Chromosome	23	49	1368567	1368541	5.7e-08
102929_2	CTTTTCGGGTGGTTTGTTACTTGTTTTACTGGGGATATGCCAACAAACCACCCCAATAC	Chromosome	2	42	1647102	1647062	5.9e-14	Chromosome	41	58	1292959	1292942	0.0078
102928_2	CTTTTCGGGTGGTTTGTTACTTGTTTTACCGGGGACATGCCAACAAACCACCCCAATAC	Chromosome	2	42	1647102	1647062	5.9e-14	Chromosome	41	58	1292959	1292942	0.0078
102927_2	CTTTTCGGGTGGTTTGTTACTTGCTTTACCGGGGATATGCCAACAAACCACCCCAATAC	Chromosome	2	42	1647102	1647062	5.9e-14	Chromosome	41	58	1292959	1292942	0.0078
104174_2	GAACAGGAAGAAGCTTGCTTCTTTGCTGACGGGTGGCGGACACGGAACAGGAAGAAGCTTGCTTCTTTGCTGACGGGTGGCGGACGGGTGG	Chromosome	2	41	4208217	4208256	4e-13	Chromosome	46	90	4166729	4166773	6.6e-16
104173_2	GAACAGGAAGAAGCTTGCTTCTTTGCTGACGAGTGGCGGAACAGGAAGAAGCTTGCTTCTTTGCTGACGAGTGGCGGACGGGTGG	Chromosome	2	40	223841	223879	2.8e-14	Chromosome	40	84	4166729	4166773	1.3e-17
104693_2	GAAGAGTTGTTACTCATATGTGTGGGTTCCTGGTTTGGCTCAAAGAAAAACATAACCCATAAAATGTTAGCTGTACCAGGAACCAAAAC	Chromosome	2	41	1423799	1423838	8.3e-15	Chromosome	45	85	2167117	2167157	1.1e-13
105666_2	GAATGTGAAATGTCCGGTTTGCCACCAGGGAGAAATTTTCCCTGGTGTTGGCGCAGTATTCGCGCACCCCGGTCC	Chromosome	2	36	3168249	3168215	1.8e-10	Chromosome	37	74	3350642	3350679	8.5e-14
105838_2	GAATTGGTCTGCGATTCAGACCATGGTAGCAAAGCTACCTTGTACATTTACCCTGTCTGTCCATAGCGAACGGATATGACAGGGTGAGAAT	Chromosome	2	69	2942786	2942865	3e-19	Chromosome	70	88	2946056	2946038	0.004
105839_2	GAATTGGTCTGCGATTCAGACCATGGTAGCAAAGCTACCTTGTACATTTACCCTGTCTGTCCATAGTGAACGGATATGACAGGGTGAGAAC	Chromosome	2	69	2942786	2942865	6.5e-21	Chromosome	70	88	2946056	2946038	0.004
105840_2	GAATTGGTCTGCGATTCAGACCATGGTAGCAAAGGTACATTTACCCTGTCTGTCCATAGTGAACGGATATGACAGGGTGAGAAT	Chromosome	2	62	2942786	2942865	3.6e-13	Chromosome	63	81	2946056	2946038	0.0036
106009_2	GACAAGGAGGGGGTCGGCGGTTCGATCCCGTCATCACGGACAAGGAGGGGGTCGGCGGTTCGAACCAGTCATCACCCACCG	Chromosome	2	37	2520965	2521000	1.2e-12	Chromosome	40	80	780799	780839	4.4e-12
106010_2	GACAAGGAGGGGGTCGGCGGTTCGATCCCGTCATCACGGACAAGGAGGGGGTCGGCGGTTCGATCCCGTCAGCACCCACCA	Chromosome	2	37	2521085	2521120	1.2e-12	Chromosome	40	81	780799	780840	2.6e-14
106008_2	GACAAGGAGGGGGTCGGCGGTTCGATCCCGTCATCACCCACCGGACAAGGAGGGGGTCGGCGGTTCGATCGCGTCATCACCCACCACTTTG	Chromosome	2	42	781102	781142	2.4e-15	Chromosome	45	90	2521085	2521130	1.8e-16
106626_2	GACCTATCTCGGCGTGAAAGCTATTGATGCGTCTTTACCGCCGAGGTTGCAGAC	Chromosome	2	29	1301653	1301680	8.7e-07	Chromosome	31	53	923135	923157	1.1e-05
107603_2	GAGAACGGCGGACTGTTAATCACGGAGAACGGCGGACTGTTAATCG	Chromosome	2	21	2044569	2044588	0.0004	Chromosome	26	45	2062280	2062299	0.0004
107648_2	GAGAATCACGCGAGCTGGCCGATCAAGGAGAATCACGCGAGCTGGCA	Chromosome	9	26	3572707	3572690	0.0053	Chromosome	29	47	4416963	4416981	0.0015
107790_2	GAGAGATGGTAATGCCGGGCGGCAACATCAACCTGTTGTCGCCTGCTCTGGATTG	Chromosome	2	31	3470286	3470257	6.9e-08	Chromosome	30	54	1705704	1705728	9e-07
107789_2	GAGAGATGGTAATGCCGGGCGACAACATCAACCTGTTGTCGCCTGCTCTGGATCG	Chromosome	2	31	3470286	3470257	1.5e-09	Chromosome	30	53	1705704	1705727	3.2e-06
108118_2	GAGCCGTACCAGGAACCACCTCCTTAGCCTGTGTACTGGTATCCTGGTACGACAACG	Chromosome	2	35	2167141	2167174	4.4e-10	Chromosome	35	57	1863691	1863713	1.2e-05
108119_2	GAGCCGTGGCGCTGGCGAACATCGACCCGATCATAGTGCATCAGTTCGCCACCGCCCCGGCGAGCCAG	Chromosome	2	34	2338272	2338240	4.4e-11	Chromosome	36	66	4399840	4399870	2.7e-08
108313_2	GAGCTGTACCAGGAACCACCTCCTTAACCTGTGTACTGGTATCCTGGTACGACAACGA	Chromosome	2	35	2167141	2167174	4.5e-10	Chromosome	35	58	1863691	1863714	3.5e-06
111707_2	GATGCCAGCTTTCGCTAACCACGGAGGGTAATATTCTGATTAGCCTGGTCGTGATTAGCGTGGTGGTGATTC	Chromosome	2	38	3340172	3340136	1.3e-11	Chromosome	37	71	3950341	3950375	3.7e-12
111708_2	GATGCCAGCTTTCGCTAACCACGGCAGGTAATATTCTGATTAGCCTGGTCGTGATTAGCGTGGTGGTGATTC	Chromosome	2	38	3340172	3340136	1.3e-11	Chromosome	37	71	3950341	3950375	3.7e-12
111709_2	GATGCCAGCTTTCGCTAACCACGGCGGGTAATATTCTGATTAGCCTGGTCGTGATTAGCGTGGTAGTGATTC	Chromosome	2	38	3340172	3340136	2.9e-13	Chromosome	37	71	3950341	3950375	1.7e-10
111710_2	GATGCCAGCTTTCGCTAACCACGGCGGGTAATGTTCTGATTAGCCTGGTCGTGATTAGCGTGGTGGTGATTC	Chromosome	2	38	3340172	3340136	1.3e-11	Chromosome	37	71	3950341	3950375	3.7e-12
112244_2	GATTAAGCAGTAAGCCGGTCATAAAAGGATTAAGCAGTAAGCCGGTCATAAAAC	Chromosome	2	26	3946823	3946847	8.7e-07	Chromosome	29	54	228879	228904	2.4e-07
113192_2	GATTGCTGTGCGTAGTCTTTGCCCATCTCCCATTCATCTTATTTTTGTCTGTCGCTTTAGACTATACACAGCATAA	Chromosome	2	32	1770431	1770461	3.1e-08	Chromosome	31	76	1216670	1216715	3.1e-18
113196_2	GATTGCTGTGTGTAGTCTTTGCCCATCTCCCATTCATCTTATTTTTGTCTGTCGCTTTAGACCATACACAGCATAA	Chromosome	2	32	1770431	1770461	6.7e-10	Chromosome	31	76	1216670	1216715	1.4e-16
113195_2	GATTGCTGTGTGTAGTCTTTGCCCATCTCCCATTCATCCTATTTTTGTCTGTCGCTTTAGACTATACACAGCATAA	Chromosome	2	32	1770431	1770461	6.7e-10	Chromosome	31	76	1216670	1216715	1.4e-16
113197_2	GATTGCTGTGTGTAGTCTTTGCCCATCTCCCATTCATCTTATTTTTGTCTGTCGCTTTAGACTATACACAACATAA	Chromosome	2	32	1770431	1770461	6.7e-10	Chromosome	31	76	1216670	1216715	1.4e-16
113995_2	GCACGCCACAACATATTGCCAATCACTGCACGCCACAACATATTGCG	Chromosome	9	27	973363	973381	0.0015	Chromosome	29	46	4224766	4224783	0.0053
114612_2	GCCATCGCCCTGGGGGGCACCATTGGACGTGTCCCAGGGCACACGGCCATCGCCCTGGGGGGCACCATTGGACGTGTCCCAGGGCAACGTG	Chromosome	48	71	3980943	3980966	6.7e-06	Chromosome	71	91	453831	453811	0.00031
114775_2	GCCTCACCTTAAAGAAGCGTTCTTTGCAGTGCTCACACATGTGATCACGGCCTCACCTTAAAGAAGCGTTCTTTGCAGTGCTCACACAG	Chromosome	2	39	3943345	3943382	5e-12	Chromosome	43	89	4209676	4209722	1.1e-13
115287_2	GCGTTGGGAGTGAGGCTGAAGAGAATAAGGCCGTTCGCTTACGGCGTTGGGAGTGAGGCTGAAGAGAATAAGGCCGTTCGCTTCTATTG	Chromosome	1	40	2729546	2729507	8.3e-15	Chromosome	44	83	4168270	4168309	8.3e-15
115726_2	GCTCATCAGCAGTGTAAAAGGCACATCACGGCTCATCAGCAGTGGAAAAGGCG	Chromosome	5	23	4250448	4250466	0.0018	Chromosome	23	40	2468701	2468684	0.0066
116724_2	GGAACGGCGTTCCAGGGGCAGATACCCTGGTAGTCCCCGCCGTGAACGGCGTTCCAGGGGCAGATACCCTGGTAGTCCCCGCCG	Chromosome	3	21	4442338	4442356	0.0036	Chromosome	20	48	4036320	4036348	2.2e-05
117025_2	GGATAAGGGTGAGGTCGGTGGCTCAAGTCCACTCAGGCCTATCACGGGATAAGGGTGAGGTCGGTGGCTCAAGTCCACTCAGGCCTACCAC	Chromosome	2	44	225415	225457	4e-13	Chromosome	48	90	3427118	3427076	8.5e-15
117676_2	GGCGCACCCCTGATAAGGGTGAGGTCGGTGGTTCAAGTCTAATCACGGGCGCACCCCTGATAAGGGTGAGGTCGGTGGTTCAAGTCCAC	Chromosome	2	45	225405	225448	1.1e-13	Chromosome	49	89	3427128	3427088	2.3e-15
119316_2	GGGAGCGGTAGTTCAGTCGGTTGGAATACCTGCCTATCACGGGGAGCGGTAGTTCAGTCGGTTGGAATACCTGCCTGTCACGG	Chromosome	2	41	3946872	3946911	1.6e-11	Chromosome	39	82	236927	236970	9.7e-14
119526_2	GGGTGAGGCGTCCGAGTGGCTGAAGGAGCACGGGGTGAGGCGTCCGAGTGGCTGAAGGAGCACC	Chromosome	2	32	925971	925941	2.4e-08	Chromosome	34	63	1097652	1097623	8.8e-08
119769_2	GGTCACGCAGGGGGTCGCGGGTTCGAGTCCCGTCCGTTCCGCGGGTCACGCAGGGGGTCGCGGGTTCGAGTCCCGTCCGTTCCGCCA	Chromosome	2	42	3946906	3946946	2.2e-15	Chromosome	45	87	228962	229004	1.7e-16
119981_2	GGTTAATCCGTATGTCACTGGTTCGAGTCCGGTCAGAGGAGTCACGGGTTAATCCGTATGTCACTGGTTCGAGTCCGGTCAGAGGAGCCAG	Chromosome	2	44	2062293	2062335	4e-13	Chromosome	48	90	2059884	2059926	8.5e-15
119980_2	GGTTAATCCGTATGTCACTGGTTCGAGTCCAGTCAGAGGGGGTTAATCCGTATGTCACTGGTTCGAGTCCAGTCAGAGGAGCCAG	Chromosome	2	39	2044582	2044619	1e-13	Chromosome	42	84	2059884	2059926	1.7e-16
119977_2	GGTTAATCCGTATGTCACTGGTTCGAGTCCAGTCAGAGGAGTCACGGGTTAATCCGTATGTCACTGGTTCGAGTCCAGTCAGAGGAGTCAG	Chromosome	2	44	2062293	2062335	8.5e-15	Chromosome	48	90	2059884	2059926	8.5e-15
119975_2	GGTTAATCCGTATGTCACTGGTTCGAGTCCAGTCAGAGGAGCGGGTTAATCCGTATGTCACTGGTTCGAGTCCAGTCAGAGGAGCCAG	Chromosome	2	42	2058069	2058029	2.3e-15	Chromosome	45	87	2044582	2044624	1.7e-16
120398_2	GTAATCCGTATGTCACTGGTTCGAGTCCAGTCAGAGGAGCCACGGTAATCCGTATGTCACTGGTTCGAGTCCAGTCAGAGGAGCCAG	Chromosome	2	42	2062295	2062335	2.2e-15	Chromosome	46	86	2059886	2059926	2.2e-15
120465_2	GTACTCAGATGTGGTGAAATGAAAACTATCACGGTACTCAGAGGTGGTGAAATGAAAAG	Chromosome	13	30	1490344	1490327	0.0078	Chromosome	35	56	1908565	1908544	4.7e-05
120712_2	GTATCCCTGGTGTTGGCGCAGTATTCGCGCACCCCGGTCTTTGCTGTCGCCATCGCCAGTGGTATGC	Chromosome	4	40	3350644	3350680	2.6e-13	Chromosome	41	66	4521923	4521898	3.4e-07
120912_2	GTCATCGCCCTGGGGGGCACCATTGGACGTGTCCCAGGGCAACGTG	Chromosome	2	26	3980942	3980966	6.6e-07	Chromosome	26	46	453831	453811	0.00011
120914_2	GTCATCGCCCTGGGGGGCACCATTGGACGTGTCCCAGGGCCACGGTCATCGCCCTGGGGGGCACCATTGGACGTGTCCCAGGGCAACGTG	Chromosome	46	70	3980942	3980966	1.8e-06	Chromosome	70	90	453831	453811	0.00031
120915_2	GTCATCGCCGTGGGGGGCACCATTGGACGTGTCCCAGGGCACACGGTCATCGCCCTGGGGGGCACCATTGGACGTGTCCCAGGGCAACGTG	Chromosome	47	71	3980942	3980966	1.9e-06	Chromosome	71	91	453831	453811	0.00031
121351_2	GTGATATGTAGGTGAAGCGACTTGCTCGTGGAGCTGAAATCATCACGGTGATATGTAGGTGAAGCGACTTTCTCGTGGAGCTGAAATCAGC	Chromosome	2	42	3425075	3425035	2.4e-15	Chromosome	44	90	227462	227508	2.4e-15
121586_2	GTGTGGGCACTCGAAGATACGGATTCCTTAAAGAAGCGTACTTTGCAGTGCCCACACAG	Chromosome	1	26	223655	223680	2.8e-07	Chromosome	26	59	225313	225346	4.6e-10
121590_2	GTGTGGGCACTCGAAGATACGGATTCTCCTTAAAGAAGCGTTCTTTGCAGTGCTAACACAG	Chromosome	1	27	4035415	4035441	8.2e-08	Chromosome	28	61	4209689	4209722	4.9e-10
121588_2	GTGTGGGCACTCGAAGATACGGATTCCTTAAAGAAGCGTACTTTGCAGTGCTCACCCAG	Chromosome	1	26	223655	223680	2.8e-07	Chromosome	26	59	3427220	3427187	4.6e-10
121584_2	GTGTGGGCACTCGAAGATACGGATTCCCCTTAAAGAAGCGTTCTTTGCAGTGCTCACACAG	Chromosome	1	26	4208031	4208056	2.9e-07	Chromosome	28	61	3943350	3943383	1e-11
121587_2	GTGTGGGCACTCGAAGATACGGATTCCTTAAAGAAGCGTACTTTGCAGTGCTCACACAA	Chromosome	1	26	3428878	3428853	2.8e-07	Chromosome	26	58	3427220	3427188	3.6e-11
121593_2	GTGTGGGCACTCGAAGATACGGATTCTTAACCCTTAAAGAAGCGTTCTTTGAAGTGCTCACAAAG	Chromosome	1	31	2731273	2731243	5.4e-10	Chromosome	32	65	4037073	4037106	5.4e-10
121589_2	GTGTGGGCACTCGAAGATACGGATTCTCCTTAAAGAAGCGCTCTTTGCAGTGCTCACACAG	Chromosome	1	27	4166543	4166569	8.2e-08	Chromosome	28	61	3943350	3943383	4.9e-10
121595_2	GTGTGGGCACTCGAAGATACGGATTCTTAACCCTTAAAGAAGGGTTCTTTGAAGTGCTCACACAG	Chromosome	1	31	3428878	3428848	5.4e-10	Chromosome	32	65	4037073	4037106	5.4e-10
121594_2	GTGTGGGCACTCGAAGATACGGATTCTTAACCCTTAAAGAAGCGTTCTTTGAAGTGCTCACACTG	Chromosome	1	31	4035415	4035445	5.4e-10	Chromosome	32	63	4037073	4037104	1.5e-10
121585_2	GTGTGGGCACTCGAAGATACGGATTCCTAACGTCGCAAGACCCTTAAAGAAGCGTACTTTGCAGTGCTCACACAG	Chromosome	1	41	4166543	4166583	8.5e-14	Chromosome	42	75	2729615	2729582	1.4e-11
121596_2	GTGTGGGCACTCGAAGATACGGATTCTTAACGACCTTACCTTAAAGAAGCGTACTTCGCAGTGCTCACACAG	Chromosome	1	32	4208031	4208062	1.7e-10	Chromosome	34	72	225308	225346	1e-12
121602_2	GTGTGGGCACTCGAAGATGCGGATTCTTAACGACCTTAAAGAAGCGTACTTTGCAGTGCTCACACAG	Chromosome	1	32	4208031	4208062	7.3e-09	Chromosome	33	67	2729616	2729582	3.4e-12
121604_2	GTGTGGGCACTCGGAGATACGGATTCTTAACGACCTTACCTTAAAGAAGCGTACTTTGCAGTGCTCACACAG	Chromosome	1	32	2731273	2731242	8.1e-09	Chromosome	34	72	3427225	3427187	2.2e-14
122052_2	GTTCAACAAAAACATGTCCACCTACGTTGACTACATCACGGTTCAACAAAAACATGTCCACCTACGTTGACTG	Chromosome	2	38	986010	985974	1.4e-11	Chromosome	42	72	2311771	2311741	6.3e-10
122583_2	GTTGCTGTGTGTAGTCTTTGCCCATCTCCCTTTATTACTACACACAGCAGCG	Chromosome	2	30	1770432	1770460	4.9e-09	Chromosome	31	50	1103300	1103281	0.00049
122676_2	GTTGTTTTGTTTGAACATCTGCTTCCTTTCTGCTTCTTCTGGAACCGCAAGGCCAGAGGAAAAGTTGTCAAGGATGAGCAGGAAGCAAAAC	Chromosome	2	42	1421526	1421486	2.4e-15	Chromosome	45	88	2924266	2924223	2.4e-15
122675_2	GTTGTTTTGTTTGAACATCTGCTTCCTTTCTGCTTCTTCTGCCGCAAGGCCAGAGGAAAAGTTGTCAAGGATGAGCAGGGAGCAAAAC	Chromosome	2	41	1421526	1421487	8.1e-15	Chromosome	41	85	2924267	2924223	1.4e-17
123008_2	GTTTCCCTGGTGTTGGCGCAGTATCCGCGCACCCCGGTCTTTGCTGTCGCCATCGCCAGTGGTATGC	Chromosome	2	40	3350642	3350680	9.3e-13	Chromosome	41	66	4521923	4521898	3.4e-07
123007_2	GTTTCCCTGGTGTTGGCGCAGTATCCGCGCACCCCGGTCTCTCACCTTGGGCAGCTGCAAAAACACCAGGGAAATG	Chromosome	2	40	3350642	3350680	1.1e-12	Chromosome	41	75	3933607	3933641	1.9e-10
123006_2	GTTTCCCTGGTGTTGGCGCAGTATCCGCGCACCCCGGTCTCTCACCTTGAGCAGCTGCAAAAACGCCAGGGAAATG	Chromosome	2	40	3350642	3350680	1.1e-12	Chromosome	41	75	3933607	3933641	1.9e-10
123015_2	GTTTCCCTGGTGTTGGCGCAGTATTCGCGCACCCCGGTCTTTGCTGTCGCCATCGCCAGTGGTAGGC	Chromosome	2	40	3350642	3350680	2e-14	Chromosome	41	64	4521923	4521900	4.4e-06
123014_2	GTTTCCCTGGTGTTGGCGCAGTATTCGCGCACCCCGGTCTTTACTGTCGCCATCGCCAGTGGTATGC	Chromosome	2	40	3350642	3350680	2e-14	Chromosome	41	66	4521923	4521898	1.6e-05
123019_2	GTTTCCCTGGTGTTGGCGCAGTATTCGCGCGCCCCGGTCTTTGCTGTCGCCATCGCCAGTGGTATGC	Chromosome	2	40	3350642	3350680	9.3e-13	Chromosome	41	66	4521923	4521898	3.4e-07
123657_2	GTTTTCCTTGCCATAGACACCATCCCCGTCTTCCCCCACATGACGCTGGGGATGGTGGCAGC	Chromosome	1	42	4106329	4106370	1.8e-14	Chromosome	43	62	1023751	1023732	0.00065
124293_2	TAAATGCCAGACTTTCTGAGCATCACATAAATGCCAGACTTTCTGAG	Chromosome	12	30	3320039	3320057	0.0015	Chromosome	29	46	1792660	1792643	0.0053
124690_2	TAAGGTCGGGGTCGCGAGTTCGAGCCTCGTTTCCCGCTCCAGTAAGGTCGGGGTCGCGAGTTCGAGCCTCGTTTCCCGCTCCAA	Chromosome	2	43	1992081	1992040	2.7e-14	Chromosome	44	84	4392396	4392436	9.9e-14
125273_2	TACAAGGAGGGGGTCGGCGGTTCGATCCCGTCATCACCCACAAGGAGGGGGTCGGCGGTTCGATCCAGTCATCACCCACCG	Chromosome	1	41	781101	781141	2e-15	Chromosome	40	80	2520965	2521005	9.4e-14
125270_2	TACAAGGAGGGGGTCGGCGGTTCGATCCCGTCATCACCCAACGTACAAGGAGGGGGTCGGCGGTTCGATCCCGTCATCACCCACCACTG	Chromosome	1	40	2521084	2521123	8.3e-15	Chromosome	44	88	781101	781145	1.4e-17
125279_2	TACAAGGAGGGGGTCGGCGGTTCGATCCCGTCATCACCTACAAGGAGGGGGTCGTCGGTTCGATCCCGTCAGCAACCACCG	Chromosome	1	41	780798	780838	9.4e-14	Chromosome	39	80	2521206	2521247	5.7e-11
125272_2	TACAAGGAGGGGGTCGGCGGTTCGATCCCGTCATCACCCACAAGGAGGGGGTCGGCGGTTCGATCCAGTCATCAACCACCG	Chromosome	1	41	780798	780838	2e-15	Chromosome	40	80	2520965	2521005	4.4e-12
125271_2	TACAAGGAGGGGGTCGGCGGTTCGATCCCGTCATCACCCACAAGGAGGGGGTCGGCGGTTCGAACCCGTCATCACCCACCG	Chromosome	1	41	780798	780838	2e-15	Chromosome	40	80	2520965	2521005	9.4e-14
125277_2	TACAAGGAGGGGGTCGGCGGTTCGATCCCGTCATCACCCCACGTACAAGGAGGGGGTCGGCGGTTCGATCCCGTCATCACCCACCACTG	Chromosome	1	39	781101	781139	3e-14	Chromosome	44	88	2521084	2521128	1.4e-17
125289_2	TACAAGGAGGGGGTCGGCGGTTCGATCCCGTCATCACGTACAAGGAGGGGGTCGGCGTTTCGATCCCGTCATCACCCACCG	Chromosome	1	37	781101	781137	3.4e-13	Chromosome	39	80	2521206	2521247	2.6e-14
125593_2	TACCTCCTTACCTTAAAGAAGCGTACTTTGCAGTGCTCACAACGTACCTCCTTACCTTAAAGAAGCGTACTTTGCAGTGCTCACACAG	Chromosome	2	41	225304	225343	8.1e-15	Chromosome	46	88	2729624	2729582	1.7e-16
125702_2	TACGCAGGGGGTCGCGGGTTCGAGTCCCGTCCGTTCCGCCACACGTACGCAGGGGGTCGCGGGTTCGAGTCCCGTCCGTTACGCCACCCTG	Chromosome	2	42	228965	229005	2.4e-15	Chromosome	47	90	3946909	3946952	2.4e-15
126416_2	TAGCGCGTGGAAATGTGGTTTGGGGAGACTTTACCAATGGAAAACTTTAAACATCTCCCTGAACCGTTCCGCG	Chromosome	1	35	2710051	2710017	1.8e-10	Chromosome	36	72	3888729	3888765	2.9e-13
126487_2	TAGGACACCGCCCTTTCACGGCGGTAACAGGGGTTCGAACGTAGGACACCGCCCTTTCACGGCGGTAACAGGGGTTCGAATCCCCTAGC	Chromosome	2	39	4209795	4209832	1.1e-13	Chromosome	43	88	3943456	3943501	3.8e-18
127210_2	TATCACGGATCCCGTCGGCTCCAGTTAGGGGAGCCGAAGGGAAACCGC	Chromosome	9	26	3890435	3890452	0.0055	Chromosome	26	47	2728570	2728549	3.3e-05
129748_2	TCGCTGCGCCGTCAGGTTCCCCCGGTGAAAATTTCACGTCGCTGCGCCGTCAGGTTCCCCCGGTGAAAATTTCACCGGGGACGGCCC	Chromosome	40	68	22044	22072	4.9e-07	Chromosome	70	87	4376838	4376855	0.014
133543_2	TGGCTTCAGTATTCCTGAGTACCGTAAACCCTGTCAGGGAATGTTGTCTGCTACTCAACCAATTGAGTGGTAGCAACTCACGTTCCCAGAC	Chromosome	2	64	194853	194929	2.4e-15	Chromosome	62	89	4106290	4106317	1.9e-06
133544_2	TGGCTTCAGTATTCCTGAGTACCGTAAACCCTGTCAGGGAATGTTGTCTGCTACTCAACCAATTGGGTAGTAGCAACTCACGTTCCCAGAC	Chromosome	2	64	194853	194929	2.4e-15	Chromosome	62	89	4106290	4106317	1.9e-06
133541_2	TGGCTTCAGCATTCCTGAGTACCGTAAACCCTGTCAGGGAATGTTGTCTGCTACTCAACCAATTGAGTAGTAGCAACTCACGTTCCCAGAC	Chromosome	2	64	194853	194929	1.1e-13	Chromosome	62	89	4106290	4106317	4e-08
133545_2	TGGCTTCAGTATTCCTGAGTACCGTAAACCCTGTCAGGGGATGTTGTCTGCTACTCAACCAATTGAGTAGTAGCAACTCACGTTCCCAGAC	Chromosome	2	64	194853	194929	2.4e-15	Chromosome	62	89	4106290	4106317	4e-08
133579_2	TGGGGCTATAGCTCAGCTGGGAGAGCGCCTGCTTTTCACGTGGGGCTATAGCTCAGCTGGGAGAGCGCCTGCTTTGCACGCAGGC	Chromosome	1	40	4037259	4037298	3.6e-13	Chromosome	41	84	3427034	3426991	4.6e-17
133791_2	TGTCATGGCGGATATTTTTCATCCCCATCACGTGTCATGGCAGATATTTTTCATCCA	Chromosome	13	31	1279738	1279756	0.0021	Chromosome	31	56	34042	34067	2.6e-07
133857_2	TGTGGGCACTCGAAGATACGGATTCTTAACACCTTAAAGAAGCGTTCTTTGCAGTGCTCACACAG	Chromosome	1	30	3941693	3941722	1.9e-09	Chromosome	31	65	3943349	3943383	3.2e-12
135234_2	TTGTGGGCACTCGAAGATACGGACTCCTTAAAGAAGCGTACTTTGTAGTGCTCACACAG	Chromosome	2	26	4208032	4208056	4.7e-05	Chromosome	26	59	4168201	4168234	9.9e-12
135237_2	TTGTGGGCACTCGAAGATACGGATTCTTAACGTCGCCTTAAAGAAGCGTACTTTGCAGTACTCACACAG	Chromosome	2	36	4166544	4166578	3.5e-12	Chromosome	36	69	225313	225346	5.9e-10
135238_2	TTGTGGGCACTCGAAGATACGGATTCTTAACGTCGCCTTAAAGAAGCGTACTTTGCAGTGTTCACACAG	Chromosome	2	36	3428877	3428843	3.5e-12	Chromosome	36	69	2729615	2729582	5.9e-10
135243_2	TTGTGGGCACTCGAGGATACGGATTCTTAACGTCGCCTTAAAGAAGCGTACTTTGCAGTGCTCACACAG	Chromosome	2	36	2731272	2731238	1.6e-10	Chromosome	36	69	3427220	3427187	1.3e-11
135614_2	TTTCCCTGGTGTTGGCACAGTATTCGCGCACCCCGGTCTCTTGATTTGCCCTTCTGTAGCCATCACCAGAG	Chromosome	1	39	3350642	3350680	1e-12	Chromosome	40	71	3888505	3888536	1.7e-10
137020_1	AAAAAGCAAAGCGGCACTGCTCTTTAACAATTTATCAGACAATCTAAAATGCTTGCCTCTGTAGCGGGAAGGCGTATTATGCACAC	Chromosome	1	45	3941647	3941691	1.3e-17	Chromosome	47	86	4166444	4166483	3.7e-13
139094_1	AAACTGGCTGCGTGGGCACGATATGGAAAAACCATCACGATACTGGATGCGTGGGCACCATATGGAAAAAA	Chromosome	2	26	3200830	3200806	1.3e-06	Chromosome	25	42	1400719	1400736	0.01
139327_1	AAAGACGCTCTCTCCGTTTGGAGGAGTGAAGTTTCACTGTCTTGCGGTTTTGCTTTTGGCATG	Chromosome	2	32	4179921	4179951	5.1e-10	Chromosome	36	63	503638	503611	0.0024
139298_1	AAAGAAGGGGGTCGGCGGTTCGATCCCGTCATCACCCACCACTATCACGAAAGAAGGGGGTCGGCGGTTCGATCCCGTCATCACCCACCAC	Chromosome	2	49	2521087	2521134	3.1e-14	Chromosome	51	91	780801	780841	1.1e-13
139670_1	AAAGGAGGGGGTCGGCGGTTCGATCCCGTCATCACCCAACGAAAGGAGGGGGTCGGCGGTTCGATCCCGTCATCACCCACCAC	Chromosome	2	38	780801	780837	3.5e-13	Chromosome	43	83	2521209	2521249	2.1e-15
139669_1	AAAGGAGGGGGTCGGCGGTTCGATCCAGTCATCACCCACCACTATCACGAAAGGAGGGGGTCGGCGGTTCGATCCAGTCATCACCCACCAC	Chromosome	2	49	2521087	2521134	3.1e-14	Chromosome	51	91	781104	781144	1.1e-13
139671_1	AAAGGAGGGGGTCGGCGGTTCGATCCCGTCATCACCCACCAAAGGAGGGGGTCGGCGGTTCAATCCCGTCATCACCCACCAC	Chromosome	2	42	2520967	2521007	2.1e-15	Chromosome	42	82	780801	780841	9.6e-14
139674_1	AAAGGAGGGGGTCGGCGGTTCGATCCCGTCATCACCCACCACTATCACGAAAGGAGGGGGTCGGCAGTTCGATCCCGTCATCACCCACCAC	Chromosome	2	49	2521087	2521134	6.6e-16	Chromosome	51	91	780801	780841	1.1e-13
139678_1	AAAGGAGGGGGTCGGCGGTTCGATCCCGTCATCACCCACCACTATCACGAAAGGAGGGGGTCGGCGGTTCGATCCCATCATCACCCACCAC	Chromosome	2	49	2521087	2521134	6.6e-16	Chromosome	51	91	781104	781144	1.1e-13
139681_1	AAAGGAGGGGGTCGGCGGTTCGATCCCGTCATCACCCACCACTATCACGAAGGGAGGGGGTCGGCGGTTCGATCCCGTCATCACCCACCAC	Chromosome	2	49	2521087	2521134	6.6e-16	Chromosome	53	91	780803	780841	3.1e-14
139680_1	AAAGGAGGGGGTCGGCGGTTCGATCCCGTCATCACCCACCACTATCACGAAAGGAGGGGGTCGGCGGTTCGATCCCGTCATCGCCCACCAC	Chromosome	2	49	2521087	2521134	6.6e-16	Chromosome	51	91	781104	781144	1.1e-13
139682_1	AAAGGAGGGGGTCGGCGGTTCGATCCCGTCATCACCCACCACTATCACTAAAGGAGGGGGTCGGCGGTTCGATCCCGTCATCACCCACCAC	Chromosome	2	46	2521087	2521131	6.6e-16	Chromosome	51	91	780801	780841	2.4e-15
139685_1	AAAGGAGGGGGTCGGCGGTTCGATCCCGTCATCACCCACCCGAAAGGAGGGGGTCGGCGGTTCGATCCCATCATCACCCACCAC	Chromosome	2	40	2521087	2521125	2.7e-14	Chromosome	44	84	780801	780841	9.9e-14
139688_1	AAAGGAGGGGGTCGGCGGTTCGATCCCGTCATCACCCACGAAAGGAGGGGGTCGGCGGTTCGATCCCGTCATAACCCACCAC	Chromosome	2	39	780801	780838	9.6e-14	Chromosome	42	82	2521209	2521249	9.6e-14
139697_1	AAAGGAGGGGGTCGGTGGTTCGATCCCGTCATCACCCACCAGAAAGGAGGGGGTCGGTGGTTCGATCCCGTCATCACCCACCAC	Chromosome	2	41	2521087	2521126	3.6e-13	Chromosome	44	84	780801	780841	9.9e-14
139695_1	AAAGGAGGGGGTCGGCTGTTCGATCCCGTCATCACCCACCACTATCACGAAAGGAGGGGGTCGGCTGTTCGATCCCGTCATCACCCACCAC	Chromosome	2	49	2521087	2521134	3.1e-14	Chromosome	51	91	781104	781144	1.1e-13
140187_1	AAATAAGAGCAGGCGTTTTATCACGAAATAAGAGCAGGCGTTTTATTAC	Chromosome	7	26	2953714	2953695	0.00044	Chromosome	27	48	3986618	3986639	0.0016
140188_1	AAATAAGAGCAGGCGTTTTATCACGAAATAAGAGCAGGCGTTTTTTCAC	Chromosome	7	26	2953714	2953695	0.00044	Chromosome	27	46	3986618	3986637	0.00044
141956_1	AAATTAGATGTATCTTTCCATTTACGGCAAGGAAGGGGGCCGAAAGTAGATGTATCATTCCATTTACGGCAAGGAAGGGGGCTTGGAAGC	Chromosome	2	40	1433008	1433046	3e-14	Chromosome	44	89	1634288	1634243	8.4e-15
141957_1	AAATTAGATGTATCTTTCCATTTACGGCAAGGAAGGGGGCGAAATTAGATGTATCTTTCCATTTACGGCAAGGAAGGGGGCTTGGAAGC	Chromosome	2	40	1634288	1634250	3e-14	Chromosome	43	88	1433008	1433053	3.8e-18
141962_1	AAATTAGATGTATCTTTCCATTTACGGTAAGGAAGGGGGCTGAAATTAGATGTATCTTTCCATTTACGGTAAGGAAGGGGGCTTGGAAGC	Chromosome	2	41	1433008	1433047	3.9e-13	Chromosome	44	89	1634288	1634243	1.8e-16
141958_1	AAATTAGATGTATCTTTCCATTTACGGCAAGGAAGGGGGCTCAAAATTAGATGTATCTTTCCATTTACGGCAAGGAAGGGGGCTTGGAAGC	Chromosome	2	41	1634288	1634249	8.5e-15	Chromosome	45	90	1433008	1433053	3.9e-18
142527_1	AACAACAGCCCGATATCGTTAATCACGAACAACAGCCCGATATCGTG	Chromosome	11	28	2475065	2475048	0.0053	Chromosome	29	46	2174690	2174673	0.0053
142585_1	AACAAGGAGGGGGTCGGCGGTTCGATCCCGCCATCACCCACCACGAACAAGGAGGGGGTCGGCGGTTCGATCCCGCCATCACCCACCACTA	Chromosome	2	44	781102	781144	8.5e-15	Chromosome	47	90	2521207	2521250	2.4e-15
142584_1	AACAAGGAGGGGGTCGGCGGTTCGATCCCGACATCACCCACCACGAACAAGGAGGGGGTCGGCGGTTCGATCCCGACATCACCCACCACTA	Chromosome	2	44	781102	781144	8.5e-15	Chromosome	47	90	2521207	2521250	2.4e-15
142596_1	AACAAGGAGGGGGTCGGCGGTTCGATCCCGTCATCACCCACCACGAACAAGGAGGGGGTCGGCGGTTCGATCACGTCATCACCCACCACTG	Chromosome	2	44	780799	780841	1.8e-16	Chromosome	47	90	2521207	2521250	2.4e-15
142591_1	AACAAGGAGGGGGTCGGCGGTTCGATCCCGTCATCACCCACCACAAACAAGGAGGGGGTCGGCGGTTCGATCCCGTCATCACCCACCACTA	Chromosome	2	44	780799	780841	1.8e-16	Chromosome	47	90	2521207	2521250	5.1e-17
142600_1	AACAAGGAGGGGGTCGGCGGTTCGATCCCGTCATCACCCACCACGAACAAGGAGGGGGTCGGCGGTTCGATCCCGTCATCACCCACCACCG	Chromosome	2	44	2521085	2521127	1.8e-16	Chromosome	47	91	780799	780843	1.4e-17
142604_1	AACAAGGAGGGGGTCGGCGGTTCGATCCCGTCATCACCCACCACGAACAAGGAGGTGGTCGGAGGTTCGATCCCGTCATCACCCACCACTG	Chromosome	2	44	780799	780841	1.8e-16	Chromosome	47	90	2521207	2521250	1.1e-13
142611_1	AACAAGGAGGGGGTCGGCGGTTCGATCCCGTCATTACCCACCACGAACAAGGAGGGGGTCGGCGGTTCGATCCCGTCATTACCCACCACTA	Chromosome	2	44	2521085	2521127	8.5e-15	Chromosome	47	90	781102	781145	2.4e-15
142613_1	AACAAGGAGGGGGTCGGCGGTTCGATTCCGTCATCACCCACACGAACAAGGAGGGGGTCGGCGGTTCGATCCCGTCATCACCCACCACTG	Chromosome	2	41	780799	780838	3.9e-13	Chromosome	46	89	2521207	2521250	5e-17
142636_1	AACAATTTATCAGACAATCTAAAATGCTTGACTCTGTAGCGGGAAAGCGTATTATGCACAC	Chromosome	1	20	3428898	3428879	0.00063	Chromosome	22	61	3941593	3941632	4.8e-15
142629_1	AACAAGGGGGGGGTCGGCGGTTCGATCCCGTCATCACCCACCACGAACAAGGGGGGGGTCGGCGGTTCGATCCCGTCATCACCCACCACTA	Chromosome	2	44	781102	781144	8.5e-15	Chromosome	47	90	2521085	2521128	2.4e-15
145301_1	AACTTAAACGTATCGTTCATCATCACTAACTTAAACGTATCGTTCAA	Chromosome	9	26	1827093	1827110	0.0053	Chromosome	29	46	106574	106591	0.0053
145316_1	AACTTAGACGTATCGTTCATCATCACGAACTTAAACGTATCGTTCAA	Chromosome	9	26	1827093	1827110	0.0053	Chromosome	29	46	106574	106591	0.0053
145317_1	AACTTATACGTATCGTTCATCATCACGAACTTAAACGTATCGTTCAA	Chromosome	9	26	1827093	1827110	0.0053	Chromosome	29	46	106574	106591	0.0053
146719_1	AAGCATTTGATGCAATATTTTGTCAGGTGTAAGCGCAGCGATGCGTTGAGCTAACCGGTACTAATGAACCGTGAGG	Chromosome	1	26	4472585	4472610	4e-07	Chromosome	27	76	228604	228653	1.8e-20
147420_1	AAGGAAGAAGCTTGCTTCTTTGATCACGTAGGAAGAAGCTTGCTTCTTC	Chromosome	2	28	4035604	4035630	0.00012	Chromosome	30	48	4166732	4166750	0.0016
148104_1	AAGGTCGGGGTCGCGAGTTCGAGTCTCGTTTCCAGCTGAAGGTCGGGGTCGCGAGTTCGAGTCTCGTTTCCCGCTC	Chromosome	1	37	4392396	4392432	1.4e-11	Chromosome	39	76	1992081	1992044	8.6e-14
149898_1	AATATTTTAGCCGCCCCAGTCAGTCTTGCCATAGACACCATCCCTGCCTTCCCCCACATG	Chromosome	1	24	4049964	4049987	3.7e-06	Chromosome	25	60	4106335	4106370	3.7e-11
153043_1	AATGGGGATTTTTAACGACCATCACGAATGGGGATTTTTCACGAG	Chromosome	2	20	3448213	3448195	0.0014	Chromosome	20	39	3597584	3597565	0.00038
153040_1	AATGGGGATTTTTAACGACCATAACGAATGGGGATTTTTAACGAG	Chromosome	2	20	3448213	3448195	0.0014	Chromosome	21	38	4496064	4496047	0.0049
153355_1	AATGTCTGCATCACGGGAAGAACAAAATGGATAATGCTGCAAGAAACTGTACCCGAACGTCGATTTCTACTCTGGTATCATCCTGAAAGCC	Chromosome	2	39	1787420	1787457	1.1e-13	Chromosome	41	90	753403	753354	2.3e-20
155526_1	AATTGATAGGTGAAGTCAACTTCGGGTTGAGCATTAATCCGTATGTCACTGGTTCGAGTCCAGTCAGAGGAGCCAC	Chromosome	2	33	2976376	2976345	1.9e-10	Chromosome	34	75	2062294	2062335	5.2e-16
155635_1	AATTGCTGTGTGTAGTCTTTGCCCATCTCCCATTCATCTTATTTTTGTCTGTCGCTTTAGACTATACACAGCATAA	Chromosome	1	32	1770430	1770461	1.9e-10	Chromosome	31	76	1216670	1216715	3.1e-18
156699_1	AATTTTAGCCGCCCCAGTCAGTAAAGTTATCGGAATGCGTGTTCTGGTGAACAGTTGGCTTAGGGAGGA	Chromosome	2	24	4049967	4049989	1.6e-05	Chromosome	27	65	2942721	2942759	2.1e-09
157502_1	ACAAGATCGCTGCAGGGGCTGATAAGAAGCCCCTGCGCACTTGG	Chromosome	1	24	461473	461496	0.0001	Chromosome	21	44	3450448	3450425	0.0001
157494_1	ACAAGATAGCTGCAGGGGCTGATAAGAAGCCCCTGCGCACTATCACGACAAGATAGCTGCAGGGGCTGATAAGAAGCCCCTGCGCACTTGG	Chromosome	46	71	461471	461496	2.4e-05	Chromosome	68	91	3450448	3450425	0.00031
157501_1	ACAAGATCGCTGCAGGGGCTGATAAGAAGCCCCTGCGCACTGTCACGACAAGATCGCTGCAGGGGCTGATAAGAAGCCCCTGCGCACTCGG	Chromosome	21	41	3450448	3450428	0.014	Chromosome	46	71	461471	461496	2.4e-05
157644_1	ACACATTTTTTAAGTGCTTCTTACTTATAAGGGTTTTATATCTATGGATCAGACAAAA	Chromosome	5	27	2025286	2025264	0.00059	Chromosome	26	55	1842353	1842382	1.6e-09
157808_1	ACACGACGCTCTCCGATCTCTCATCACGATATTTGTGTTGATCATATTTGTGTTGATCCTATTT	Chromosome	29	46	1335588	1335571	0.0088	Chromosome	45	64	2560305	2560286	0.00068
160812_1	ACCATTTGCCAGTTTGTCTGGCAATCACGACCATTTGCCAGTTTGTCTGGC	Chromosome	8	26	78378	78360	0.0017	Chromosome	31	49	1994924	1994906	0.0017
161426_1	ACCTTAAAGAAGCGTACTTTGCAGTGCTAACACGACCTTAAAGAAGCGTACTTTGCAGTGCTCACACAG	Chromosome	1	33	225312	225344	2.1e-09	Chromosome	35	69	2729616	2729582	3.5e-12
161661_1	ACGACGCACTTCCGATCTGCTATCACGATAAGCAGTAAGCCGGTCATAAGCAGTAAGCCGGTCATAA	Chromosome	29	49	228881	228901	0.0002	Chromosome	47	67	3946825	3946845	0.0002
161750_1	ACGACGCTCTTTCCGATCTCTCATCACGATATTTGTGTTGATCATATTTGTGTTGATCCTATTT	Chromosome	29	46	1335588	1335571	0.0088	Chromosome	45	64	2560305	2560286	0.00068
161984_1	ACGCACGCAGGGGGTCGCGGGTTCGAGTCCCGTCCGTGCCGCCACGCAGGGGGTCGCGGGTTCGAGTCCCGCCCGTTCCGCC	Chromosome	4	45	236967	237008	2.7e-14	Chromosome	43	82	228964	229003	3.4e-13
163070_1	ACGTAAACGACAATGTTTATCTACGAACTTTAAGAACACTCAGGATAAACGACAATGTTTATCTACGAACTTTAAGAACACTC	Chromosome	5	49	1434497	1434453	5.8e-16	Chromosome	47	81	1632799	1632833	4.5e-12
163218_1	ACGTCAAGGTCGGGATCGCGAGTTCGAGTCTCGTTTCCCGCTCAAGGTCGGGGTCGCGAGTTCGAGTCTCGTTTCCCGCTCC	Chromosome	5	43	1992082	1992044	1.2e-12	Chromosome	43	82	4392507	4392546	7.4e-15
165090_1	ACTGGCAGGCGATTTTCGCCACGACTGGCAGGCGATTTACGCCACC	Chromosome	2	22	1740384	1740404	0.00011	Chromosome	23	40	1025872	1025889	0.0051
164996_1	ACTGCCTGGCGGCAGTAGCGCGGTGATCCCACCTGACCCCAATGGTAGTGTGGGGTCTCCCCATGCGAGAGTAGGGAACTGCCAGGCATCC	Chromosome	3	41	4171637	4171675	1.4e-12	Chromosome	39	90	3423718	3423667	8.4e-20
165766_1	ACTTGAGCAGCTGCAAAAACACCAGGGAAATACTTTCCCTGGTGTTGGCGCA	Chromosome	2	33	3933612	3933643	1e-10	Chromosome	34	52	3350642	3350660	0.0018
166945_1	AGAGGTAAGATGTTCTATCTTTCAGAACAGGGAGTGTTATAAGGGTGTATTAGTCTGGAGACGGG	Chromosome	1	26	4049908	4049933	3.2e-07	Chromosome	26	64	3664890	3664928	4.1e-11
167126_1	AGATAAGGGTGAGGTCGGTGGATCAAGTCCACTCAGGCCTAGAGATAAGGGTGAGGTCGGTGGTTCAAGTCCACTCAGGCATACCAC	Chromosome	2	41	225415	225454	3.7e-13	Chromosome	44	86	3427118	3427076	8e-15
167131_1	AGATAAGGGTGAGGTCGGTGGTTCAAGTCCACTCAGGCCTAACGAGATAAGGGTGAGGTCGGTGGTTCAAGACTACTCAGGCCAACCAC	Chromosome	2	41	225415	225454	8.3e-15	Chromosome	46	88	4037175	4037217	1.8e-11
167128_1	AGATAAGGGTGAGGTCGGTGGTTCAAGTCCACTCAAGCCTATCACGAGATAAGGGTGAGGTCGGTGGTTCAAGTCCACTCAAGCCTACCAC	Chromosome	2	44	225415	225457	4e-13	Chromosome	48	90	3427118	3427076	8.5e-15
167133_1	AGATAAGGGTGAGGTCGGTGGTTCAAGTCCACTCAGGCCTACACGAGATAAGGGTGAGGTCGGTGGTTCAAGTACACTCAGGCCTACCAC	Chromosome	2	42	4037175	4037215	2.3e-15	Chromosome	47	89	225415	225457	8.4e-15
167134_1	AGATAAGGGTGAGGTCGGTGGTTCAAGTCCACTCAGGCCTACACGAGATAAGGGTGAGGTCGGTGGTTCAAGTCCACTCAGGCCCACCAC	Chromosome	2	42	3427118	3427078	2.3e-15	Chromosome	47	89	4037175	4037217	8.4e-15
167135_1	AGATAAGGGTGAGGTCGGTGGTTCAAGTCCACTCAGGCCTACACGAGATAAGGGTGAGGTCGGTGGTTCAAGTCCACTCAGGCCGACCAC	Chromosome	2	42	225415	225455	2.3e-15	Chromosome	47	89	4037175	4037217	8.4e-15
167142_1	AGATAAGGGTGAGGTCGGTGGTTCAAGTCCACTCAGGCCTATCACGAGATAAGGGTGAGGTCGGTGGTTCTAGTCCACTCAGGCCTACCAC	Chromosome	2	44	225415	225457	8.5e-15	Chromosome	48	90	3427118	3427076	8.5e-15
167141_1	AGATAAGGGTGAGGTCGGTGGTTCAAGTCCACTCAGGCCTATCACGAGATAAGGGTGAGGTCGGTGGTTCAAGTCCACTCAGGCCTACCAG	Chromosome	2	44	225415	225457	8.5e-15	Chromosome	48	90	3427118	3427076	1.8e-16
167758_1	AGATGATTACGGCCTCAGGCGACAGGCATGTTGTTGTGTTTGCAATTGGTCTGCGATTCAGACCATGGTAGCAAAGC	Chromosome	2	28	105261	105287	1.1e-07	Chromosome	29	77	2942771	2942819	6.7e-20
168244_1	AGATTCGTTATCAGTGCAGGAAATATGGGATCGTCTCATGGCCTTGCCATGGTGTTCTCTATGTTGCTGGCG	Chromosome	2	23	1622914	1622893	6.3e-05	Chromosome	22	72	3637900	3637950	4.7e-21
168757_1	AGCAAGTTTCATCCCGACCCTTTAGTGCCATGGGAAAGATAAGAATAAAATCAAAGCAAGAAGCAGTCCG	Chromosome	1	20	2025263	2025244	0.00078	Chromosome	25	67	1991820	1991778	2.8e-13
169795_1	AGCTGAAAAACATAACCCACAAAATGCCATCACGAGCTGAAAAACATAACCCACAAAATGG	Chromosome	13	34	3633841	3633820	0.0023	Chromosome	36	60	2167114	2167138	4.9e-05
169796_1	AGCTGAAAAACATAACCCACAAAATGCCATCACGAGCTGAAAAACATAACCCATAAAATGG	Chromosome	13	34	3633841	3633820	0.0023	Chromosome	36	60	2167114	2167138	1.1e-06
169989_1	AGCTGAAAAACATAACCCATAAAATGCAGGAAAATCGACAATATGTAAATGCCTGTTTGGTAT	Chromosome	2	27	2167114	2167139	3.1e-07	Chromosome	25	63	2239143	2239105	1.8e-09
170597_1	AGCTGAAAAACATAACCCATAAAATGCTAGCTGTACCGAGAACTATCCAGCGTCATGCCACAACGTCGATAGAAGACCTGTTGCAATG	Chromosome	2	43	2167114	2167155	1.4e-12	Chromosome	44	84	3655342	3655302	1.1e-13
170859_1	AGCTGAAAAACATAACCCATAAAATGCTGTGGACGTGTCGATAATTTATTCGATAAAGC	Chromosome	2	28	2167114	2167140	7.7e-08	Chromosome	30	58	1521098	1521070	2.8e-07
173071_1	AGGCAATCTACAAGATCCGTTCCTGAACGCACTGCGTCGGGGGTGGTGAAATCTGGTTGGGTAGTCTGGCTGCTTTACTGA	Chromosome	2	41	4400298	4400339	5.7e-11	Chromosome	42	80	1463641	1463679	1.2e-12
174572_1	AGTGGCAGAGTGATCAATACCCTCTTTAAAAGAAGAGGGGATTCTGATTCCGGCATTCCGAGGTTCGAATCCTCGTACCCCAGCCAG	Chromosome	1	39	4409083	4409121	2.9e-14	Chromosome	39	86	696477	696430	2.9e-19
174975_1	AGTTGAATCGGAGCTGGCTGAATATTTTAGCCGCCCCAGTCATCATGAGTTTTTAACTC	Chromosome	6	42	4049949	4049985	4.6e-10	Chromosome	41	59	58438	58456	0.0022
175459_1	ATAAAGTCGGTGGTAGTAATACGCTTTCACGATAAAGTCGGTGATAGTAATACGA	Chromosome	13	30	2348831	2348848	0.007	Chromosome	32	54	1301047	1301069	1.2e-05
175862_1	ATAGAACGGCGGACTGTTAATCCGTATGTCACTGGTTCGAGGTCGTTATTCATCGATCATCGCTTTTGTGATGGCGACCATTGAAAC	Chromosome	2	41	2059870	2059909	8e-15	Chromosome	41	84	4611262	4611305	1e-13
176441_1	ATATCACGCTTACCGATCTCGGCGTGAAAGCTATTGACGGCAGCGAAGGCATGC	Chromosome	10	37	1301651	1301678	1.9e-08	Chromosome	35	54	779156	779175	0.00052
177721_1	ATCACGCACGCAGGGAGTCGCGGGTTCGAGTCCCGTCCGTTCCGCCACGCAGGGAGTCGCGGGTTCGAGTCCCGTCCGTTCCGCCA	Chromosome	7	48	236967	237008	2.8e-14	Chromosome	46	86	228964	229004	1e-13
177723_1	ATCACGCACGCAGGGGGTCGCGGGTTCGAGTCCCGTCCGTACCGCCACGCAGGGGGTCGCGGGTTCGAGTCCCGTCCGTTCCGCCA	Chromosome	7	48	236967	237008	2.8e-14	Chromosome	46	86	228964	229004	2.2e-15
177722_1	ATCACGCACGCAGGGGGTCGCGGGTTCGAGTCCCGTCCATTCCGCCACGCAGGGGGTCGCGGGTTCGAGTCCCGTCCGTTCCGCCA	Chromosome	7	48	236967	237008	2.8e-14	Chromosome	46	86	228964	229004	2.2e-15
177725_1	ATCACGCACGCAGGGGGTCGCGGGTTCGAGTCCCGTCCGTTCCGCCACGCAGGGGGTCGCGGGTTCGAGTCCCGTCCGTTCCGC	Chromosome	7	48	236967	237008	5.9e-16	Chromosome	46	84	3946908	3946946	2.7e-14
177726_1	ATCACGCACGCAGGGGGTCGCGGGTTCGAGTCCCGTCCGTTCCGCCACTCAGGGGGTCGCGGGTTCGAGTCCCGTCCGTTCCGC	Chromosome	7	49	236967	237009	1.6e-16	Chromosome	46	84	3946908	3946946	1.3e-12
177724_1	ATCACGCACGCAGGGGGTCGCGGGTTCGAGTCCCGTCCGTTCCGCCACGCAGGGAGTCGCGGGTTCGAGTCCCGTCCGTTCCGCCA	Chromosome	7	48	228964	229005	6.1e-16	Chromosome	46	86	3946908	3946948	1e-13
177708_1	ATCACGCACAAGGAGGGGGTCGGCGGTTCGATCCCGTCATCACCCACCAGGAGGGGGTCGGCGGTTCGATCCCGTCGTCACCCAC	Chromosome	8	49	781102	781143	6e-16	Chromosome	49	85	2521210	2521246	1.7e-11
177878_1	ATCACGCCACGCAGGGGGTCGCGGGTTCGAGTCCCGTCCGTTCCACGCAGGGGGGCGCGGGTTCGAGTCCCGTCCGTTCCGC	Chromosome	8	44	236967	237003	3.4e-13	Chromosome	44	82	3946908	3946946	1.2e-12
177883_1	ATCACGCCCAAGGAGGGGGTCGGCGGTTCGATCCCGTCATCACCCACAAGGAGGGGGTCGGCGGTTCGATCCCGTCATCACCCAC	Chromosome	9	47	2520966	2521004	2.8e-14	Chromosome	46	85	780799	780838	7.8e-15
178199_1	ATCACGGATCCCGTCGGCTCCAGTTAGGGGAGCCGAAGGGAAACCGC	Chromosome	8	25	3890435	3890452	0.0053	Chromosome	25	46	4038133	4038154	3.2e-05
178597_1	ATCACGTCAAGGTCGGGGTCGCGAGTTCGAGTCTCGTTTCCCGCTCAAGGTCGGGGTCGCGAGTTCGAGTCTCGTTTCCC	Chromosome	8	46	4392507	4392545	2.6e-14	Chromosome	46	80	1992082	1992048	4.3e-12
178599_1	ATCACGTCAAGGTCGGGGTCGCGAGTTCGAGTCTCGTTTCCCGCTCAAGGTCGGGGTCGCGAGTTCGAGTCTCGTTTCCCGCT	Chromosome	8	46	1992082	1992044	2.7e-14	Chromosome	46	83	4392618	4392655	9.7e-14
179300_1	ATCCTATGTAGTTCAGTCGGTAGAACGGCGGACTCCATCACGATCCTATGTAGTTCAGTCGGTAGAACGGCGGACTG	Chromosome	2	34	2059851	2059883	2.5e-09	Chromosome	38	77	2058109	2058069	6.8e-10
179317_1	ATCCTCTGCAGTTCAGTCGGTAGAACGGCAGACTCCATCACGATCCTCTGCAGTTCAGTCGGTAGAACGGCAGACTC	Chromosome	2	34	2059851	2059883	1.1e-07	Chromosome	38	76	2058109	2058070	1.1e-07
179344_1	ATCCTCTGTAGTTCAGTCGGTAGAACGGCGAACTCCATCACGATCCTCTGTAGTTCAGTCGGTAGAACGGCGAACTG	Chromosome	2	34	2044549	2044581	2.5e-09	Chromosome	38	77	2058109	2058069	6.8e-10
179468_1	ATCCTCTGTAGTTCAGTCGGTAGAACGGTGGACTCCATCACGATCCTCTGTAGTTCAGTCGGTAGAACGGTGGACTG	Chromosome	2	34	2059851	2059883	2.5e-09	Chromosome	38	77	2058109	2058069	6.8e-10
179714_1	ATCGGTAGAACGGCGGACTGTTAATCCGTATGTCACTGGTTTGGCGCTTTCCGCAGGACTGGCACAGGCAGATGG	Chromosome	2	41	2062275	2062314	6.5e-15	Chromosome	42	74	687710	687678	5.1e-11
183691_1	ATCTCTCATCACGTCTCAACGTGCGGGGGTTTTCTCAACGTGCGGGGGTTTTCTC	Chromosome	14	36	1269902	1269924	1.2e-05	Chromosome	33	55	1270437	1270459	1.2e-05
183896_1	ATCTCTGCCAGTACGTTGAAAAACACCATCACGATCTCTGCCAGTACGTTGAAAAAAAG	Chromosome	13	31	3673725	3673743	0.0022	Chromosome	35	53	2348295	2348313	0.0022
185170_1	ATCTGCTATCACGATAAGCAGTAAGCCGGTCATAAGCAGTAAGCCGGTCATAA	Chromosome	15	35	3946825	3946845	0.00014	Chromosome	33	53	228881	228901	0.00014
188067_1	ATGAATAGTCATTTCGGCAAGGGTTCCTATCCCTGTCTTCCCACGATGAATAGTCATTTCGGCAAGGGTTCCTATCCCTGTCTTCCCCCAC	Chromosome	42	73	1741259	1741290	5.2e-07	Chromosome	74	91	4106350	4106367	0.014
188556_1	ATGGATAGTCATCTCGGCAAGGGTTCCTATCCCTGTCTTCCCACGATGGATAGTCATTTCGGCAAGGGTTCCTATCCCTGTCTTCCCCCAC	Chromosome	42	73	1741259	1741290	1.1e-08	Chromosome	74	91	4106350	4106367	0.014
188554_1	ATGGATAGACATTTCGGCAAGGGTTCCTATCCCTGTCTTCCCACGATGGATAGACATTTCGGCAAGGGTTCCTATCCCTGTCTTCCCCCAC	Chromosome	42	73	1741259	1741290	5.2e-07	Chromosome	74	91	4106350	4106367	0.014
188558_1	ATGGATAGTCATTTCGACAAGGGTTCCTATCCCTGTCTTCCCACGATGGATAGTCATTTCGACAAGGGTTCCTATCCCTGTCTTCCCCCAC	Chromosome	42	73	1741259	1741290	5.2e-07	Chromosome	74	91	4106350	4106367	0.014
188555_1	ATGGATAGTAATTTCGGCAAGGGTTCCTATCCCTGTCTTCCCACGATGGATAGTCATTTCGGCAAGGGTTCCTATCCCTGTCTTCCCCCAC	Chromosome	42	73	1741259	1741290	1.1e-08	Chromosome	74	91	4106350	4106367	0.014
188565_1	ATGGATAGTCATTTCGGCAAGGGTTCCTATCCCTGTCTTACGATGGATAGTCATTTCGGCAAGGGTTCCTATCCCTGTCTTCCCCCAC	Chromosome	43	70	1741263	1741290	3.8e-08	Chromosome	71	88	4106350	4106367	0.014
188559_1	ATGGATAGTCATTTCGGCAAGGGCTCCTATCCCTGTCTTCCCACGATGGATAGTCATTTCGGCAAGGGTTCCTATCCCTGTCTTCCCCCAC	Chromosome	42	73	1741259	1741290	1.1e-08	Chromosome	74	91	4106350	4106367	0.014
188560_1	ATGGATAGTCATTTCGGCAAGGGTCCCTATCCCTGTCTTCCCACGATGGATAGTCATTTCGGCAAGGGTTCCTATCCCTGTCTTCCCCCAC	Chromosome	42	73	1741259	1741290	1.1e-08	Chromosome	74	91	4106350	4106367	0.014
188561_1	ATGGATAGTCATTTCGGCAAGGGTTCCCATCCCTGTCTTCCACGATGGATAGTCATTTCGGCAAGGGTTCCCATCCCTGTCTTCCCCCAC	Chromosome	41	71	1741259	1741289	3.9e-08	Chromosome	71	90	4106348	4106367	0.0011
188570_1	ATGGATAGTCATTTCGGCAAGGGTTCCTATCCCTGTCTTCCCACAATGGATAGTCATTTCGGCAAGGGTTCCTATCCCTGTCTTCCCCCAC	Chromosome	42	73	1741259	1741290	1.1e-08	Chromosome	74	91	4106350	4106367	0.014
188580_1	ATGGATAGTCATTTCGTCAAGGGTTCCTATCCCTGTCTTCCCACGATGGATAGTCATTTCGTCAAGGGTTCCTATCCCTGTCTTCCCCCAC	Chromosome	42	73	1741259	1741290	5.2e-07	Chromosome	74	91	4106350	4106367	0.014
188583_1	ATGGATGGTCATTTCGGCAAGGGTTCCTATCCCTGTCTTCCCACGATGGATGGTCATTTCGGCAAGGGTTCCTATCCCTGTCTTCCCCCAC	Chromosome	42	73	1741259	1741290	5.2e-07	Chromosome	74	91	4106350	4106367	0.014
188821_1	ATGTCACGAAAGGTGGCCTGAACATCACCAAAGGTGGCCTGAACCTCACCAACG	Chromosome	16	33	3902926	3902943	0.0068	Chromosome	30	54	2100656	2100632	8.7e-07
188958_1	ATGTGGGCACTCGAAGATACGGATTCTCCTTAAAGAAGCGTTCTTTGCAGTGCTCACACAG	Chromosome	2	27	4208032	4208057	2.9e-07	Chromosome	28	61	4209689	4209722	1e-11
188960_1	ATGTGGGCACTCGAAGATACGGATTCTTAACCCTTAAAGAAGCGTACTTTGCAGTGCTAACACAG	Chromosome	2	31	3428877	3428848	1.9e-09	Chromosome	32	65	3427220	3427187	5.4e-10
189375_1	ATTAAGCAGTAAGCCGGTCATAAAACCGGTGGTTGTACAGATAAGCAGTAAGCCGGTCATAAAAACGGTGGTTGTAC	Chromosome	1	37	3946823	3946859	3.2e-13	Chromosome	42	76	228881	228915	1.9e-10
189482_1	ATTACATATTCAGCGGGCTGATTTTCACAACAGCCCGCTGGGTGC	Chromosome	2	27	1995617	1995592	1.8e-07	Chromosome	27	44	850616	850633	0.0049
189478_1	ATTACATATTCAGCGGGCTGATTTTCACAACAGCCCGCTCACGATTACATATTCAGCGGGCTGATTTTCACAACAGCCCGCTGGGTGC	Chromosome	45	70	1995617	1995592	4.9e-07	Chromosome	70	87	850616	850633	0.014
189479_1	ATTACATATTCAGCGGGCTGATTTTCACAACAGCCCGCTGACGATTACATATTCAGCGGGCTGATTTTCACAACAGCCCGCTGGGTGC	Chromosome	45	70	1995617	1995592	4.9e-07	Chromosome	70	87	850616	850633	0.014
189487_1	ATTACATATTCAGCGGGCTGATTTTCACAACAGCCCGCTTCACGATTACATATTCAGCGGGCTGATTTTCACAACAGCCCGCTGGGTGC	Chromosome	46	71	1995617	1995592	5e-07	Chromosome	71	88	850616	850633	0.014
189489_1	ATTACATATTCAGCGGGCTGATTTTCACAACAGCTCACGATTACATATTCAGCGGGCTGATTTTCACAACAGCCCGCTGGGTGC	Chromosome	41	66	1995617	1995592	4.6e-07	Chromosome	66	83	850616	850633	0.013
190868_1	ATTCCGTAGAATACCCATAATTATAAGAAAAAGGCGTTTCTCCGGACG	Chromosome	2	28	2590902	2590876	5.5e-08	Chromosome	27	47	3736950	3736930	0.00012
191419_1	ATTGATAGGTGAAGTCAACTTCGGGTTGAGCAGAAAAACATAACCCATAAAATG	Chromosome	1	32	2976376	2976345	1.1e-10	Chromosome	33	54	2167117	2167138	4e-05
191509_1	ATTGCCTGGCGGCAGTAGCGCGGTGGTCCCACCTGACCCCAAGTGTGGGGTCTCCCCATGCGAGAGTAGGGAACTGCCAGGCATAC	Chromosome	2	41	4040516	4040555	7.9e-15	Chromosome	42	84	3946777	3946819	1.7e-16
191506_1	ATTGCCTGGCGGCAGTAGCGCGGTGATCCCACCTGACCCCAATGGTAGTGTGGGGTCTCCCCATGCGAGAGTAGGGAACTGCCAGGCATCC	Chromosome	2	41	4171636	4171675	4e-13	Chromosome	39	90	3423718	3423667	8.4e-20
191514_1	ATTGCCTGGCGGCAGTAGCGCGGTGGTCTCACCTGACCCCAATGGTAGTGTGGGGTCTCCCCATGCGAGAGTAGGGAACTGCCAGGCATCC	Chromosome	2	41	4171636	4171675	4e-13	Chromosome	39	90	3423718	3423667	8.4e-20
191513_1	ATTGCCTGGCGGCAGTAGCGCGGTGGTCCCACCTGACCCCGGTAGTGTGGGGGCTCCCCATGCGAGAGTAGGGAACTGCCAGGCATCC	Chromosome	2	40	4040516	4040554	2.9e-14	Chromosome	41	87	228830	228876	4.9e-17
191508_1	ATTGCCTGGCGGCAGTAGCGCGGTGGTCCCACCTGACCCATGGTAGTGTGGGGTCTCCCCATGCGAGAGTAGGGAACTGCCAGGCATCC	Chromosome	2	39	4213039	4213076	1.1e-13	Chromosome	37	88	3423718	3423667	8.2e-20
191511_1	ATTGCCTGGCGGCAGTAGCGCGGTGGTCCCACCTGACCCCAATGGTAGTGTGGGGTCTCCCCATGCGAGAGTAGGGTACTGCCAGGCATCC	Chromosome	2	41	4040516	4040555	8.5e-15	Chromosome	39	90	3423718	3423667	3.9e-18
191510_1	ATTGCCTGGCGGCAGTAGCGCGGTGGTCCCACCTGACCCCAATGGTAGTGTGGCGTCTCCCCATGCGAGAGTAGGGAACTGCCAGGCATCC	Chromosome	2	41	4040516	4040555	8.5e-15	Chromosome	39	90	2726119	2726068	3.9e-18
191507_1	ATTGCCTGGCGGCAGTAGCGCGGTGGTCCCACCGGACCCCAATGGTAGTGTGGGGTCTCCCCATGCGAGAGTAGGGAACTGCCAGGCATCC	Chromosome	2	41	4213039	4213078	4e-13	Chromosome	39	90	2726119	2726068	8.4e-20
192484_1	ATTTCCAAAGTGGTGGTAAACACACAAATGCCTGTTAGCGTAAAAGCAAAAAACAT	Chromosome	2	22	3333440	3333420	0.00015	Chromosome	26	55	1622894	1622865	7.1e-08
192621_1	ATTTCCCTGGTGTTGGCGCAGTCTTCTGGCTTTTAACAGATAACAAGAGACCGAACACTG	Chromosome	1	26	3350641	3350666	1.3e-05	Chromosome	23	58	1923085	1923120	3.7e-11
194295_1	ATTTTTGCGGGGAACACTCTCCTGCACGGTATTGCAGCACGATTTTTGCGGGGAACACTCTCCTGCACGGTATTG	Chromosome	1	33	3162730	3162698	2.4e-09	Chromosome	30	47	2373505	2373522	0.011
195323_1	CAAAACATAACCCATAAAATGCTAGCTGCAAGAACCAGGGGCGGAAATTCCAGCCCTCTCGATAGTTACGTAGCACGG	Chromosome	2	28	2167119	2167145	1.2e-07	Chromosome	29	78	686835	686786	8.9e-19
195761_1	CAAAACTCATCTTCGGGTGATGTTTGAGAGATCACGCAAAACTCATCTTCGGGTGATGTTTGAAG	Chromosome	1	32	4209890	4209921	6.9e-09	Chromosome	37	63	4168488	4168514	9e-08
196185_1	CAAAAGGTATGCGATAACCGGAGGATGTGCTTATGGATAGATGACAACAAAGATGTAGATGGCGACAAGACCTACATGCGTCTTGGCATCG	Chromosome	2	38	3191970	3191934	4e-13	Chromosome	42	87	2312615	2312570	1.8e-16
196251_1	CAAAAGTGCGCTGATCGTCTTGCCCTGAGTGCGCAGGATTGTGCTCTCTGTAATGGGAGCAATTTCTCTGG	Chromosome	1	40	1892431	1892392	2.8e-13	Chromosome	41	71	629927	629957	1.3e-06
197327_1	CAAACAGCTTGCTGTTTCGCTGACGAGTGGCGGACGGGTGACGCAAACAGCTTGCTGTTTCGCTGACGAGTGGCGGACGGGTGAGG	Chromosome	2	41	3428686	3428647	7.9e-15	Chromosome	45	85	3941884	3941924	2.2e-15
197483_1	CAAACATCAACAACGAATGGAGCAAAAATGCCTGTTAGCGTAA	Chromosome	2	24	4106222	4106244	7.5e-06	Chromosome	25	43	1622895	1622877	0.0013
197946_1	CAAACGCTGCAGAAATCTATAACAAAGATGGCAACGGGTTGGCGGGCGTGGCGAAGTCAAAACGCTGCGCAGTCCTAAA	Chromosome	1	35	986924	986890	4.2e-12	Chromosome	39	73	2702291	2702257	4.2e-12
198901_1	CAAAGCGAAAGGTCGCAGTCACGCTACCTCAAATAAAGAGAGCTTCTCTCGATATTCAGTGG	Chromosome	1	28	3213751	3213778	2.3e-08	Chromosome	28	61	4175606	4175639	5e-10
199739_1	CAAAGTGACGGCATAATAATAAAAAAATGATTATCACGCAAAGTAACGGCATAAAAATAAAAAAATGAG	Chromosome	2	30	507216	507244	7.6e-09	Chromosome	31	52	2092379	2092358	0.0027
200072_1	CAAATAGCCCTCGCCGCTTCCCTCTACAGGAATGGCGAAGGCAAGAACCAGGGGCGGAAATCCCATCCCTCACGATTGAAACGTAGCACGG	Chromosome	2	41	765064	765103	8.5e-15	Chromosome	42	91	686835	686786	5.1e-12
200890_1	CAAATTACTGTGACTTCCAACGGCAAAAGCGCCAGCGCGAACAGCACTTTGTTAGCAATCTCGGGGCAACTAAATGTTGCCCACTTTCGTG	Chromosome	2	45	2533858	2533901	2.4e-15	Chromosome	44	90	489947	489901	5.1e-17
201381_1	CAACAAGCCGGAACCGCGTGACTACGGGACTGTTAAGCCGTATGTCACTGGTTCGAGTCCAGTCAGAGGAGCAAG	Chromosome	2	26	4408187	4408211	1.4e-06	Chromosome	27	72	2062288	2062333	1.4e-16
202352_1	CAACCACCCATTGGCGCGCTGTCGGATTTTACTGACCGACACGCAACCACTCATTGGCGCGCTGTCGGATTTTACTGACCGACAGCGGCAG	Chromosome	44	70	2724861	2724835	1.4e-07	Chromosome	71	90	3888876	3888895	0.0011
202437_1	CAACCACTCATTGGCGCGCTGTCGGATTTTACTGACCGACAGCGGCAC	Chromosome	1	27	2724861	2724835	5.5e-08	Chromosome	28	48	3888876	3888896	0.00012
202430_1	CAACCACTCATTGGCGCGCTGTCGGATTTTACGCAACCACTCATTGGCGCGCTGTCGGATTTTACTGACCGACAGCGGCAG	Chromosome	34	60	2724861	2724835	1.2e-07	Chromosome	61	80	3888876	3888895	0.00096
202434_1	CAACCACTCATTGGCGCGCTGTCGGATTTTACTGACCGACACGCAACCACTCATTGGCGCGCTGTCGGATTTTACTGACCGACAGCGGCTG	Chromosome	44	70	2724861	2724835	1.4e-07	Chromosome	71	89	3888876	3888894	0.004
202433_1	CAACCACTCATTGGCGCGCTGTCGGATTTTACTGACCGACACGCAACCACTCATTGGCGCGCTGTCGGATTTTACTGACCGACAGCGGCGG	Chromosome	44	70	2724861	2724835	1.4e-07	Chromosome	71	89	3888876	3888894	0.004
202439_1	CAACCACTCCTTGGCGCGCTGTCGGATTTTACTGACCGACACGCAACCACTCATTGGCGCGCTGTCGGATTTTACTGACCGACAGCGGCAG	Chromosome	44	70	2724861	2724835	1.4e-07	Chromosome	71	90	3888876	3888895	0.0011
203228_1	CAACGACTGGGCAAGCATCTACGGTGTAGTGGGTGTGGGGGCAGCCAGCCAAACAGTGAAGAACAAGCTGGTGGGGAGG	Chromosome	2	39	850738	850775	9.1e-14	Chromosome	40	79	923723	923762	3.3e-13
205006_1	CAAGAAGACTTCTGCGGTCAACTGGTGCTCTGTCACCCAAGAGCCATTTCCCTGGACCGAATACAGG	Chromosome	2	28	674333	674307	9.4e-08	Chromosome	30	67	1923162	1923125	1.6e-10
206371_1	CAAGCCGAAGATATCGGTAGTGGTAAAGACCTGGGAAGCATGGACGG	Chromosome	2	20	1020168	1020150	0.0015	Chromosome	20	46	1800736	1800710	5.3e-08
206373_1	CAAGCCGAAGATATCGGTGATATCACGCAAGCCGAAGATATCGGTAC	Chromosome	8	26	3752347	3752365	0.0015	Chromosome	29	46	1020168	1020151	0.0053
206520_1	CAAGCCTGCGAAGGTGTGCTGTGAGGCATGCTGGAGATATCGCAAGCCTGCGAAGGTGTGCTGTGAGGCATGCTGGAGATATCAGAAGTGG	Chromosome	2	41	2727981	2727942	4e-13	Chromosome	44	90	4211246	4211292	5.1e-17
206528_1	CAAGCCTGCGAAGGTGTGCTGTGAGGCATGCTGGCGGTATCGCAAGCCTGCGAAGGTGTGCTGTGAGGCATGCTGGAGGTAGCAGAAGTGG	Chromosome	2	41	3425580	3425541	4e-13	Chromosome	44	90	2727981	2727935	5.1e-17
206529_1	CAAGCCTGCGAAGGTGTGCTGTGAGGCGTGCTGGAGGTATCGCAAGCCTGCGAAGGTGTGCTGTGAGGCGTGCTGGAGGTATCAGAAGTGG	Chromosome	2	41	3425580	3425541	4e-13	Chromosome	44	90	4169844	4169890	5.1e-17
206527_1	CAAGCCTGCGAAGGTGTGCTGTGAGGCATGCTGGAGGTATGCAAGCCTGCGAAGGTGTGCTGTGAGGCATGCTGGAAGTATCAGAAGTGG	Chromosome	2	40	4169844	4169882	3e-14	Chromosome	40	89	2727984	2727935	5e-17
206521_1	CAAGCCTGCGAAGGTGTGCTGTGAGGCATGCTGGAGGTACCGCAAGCCTGCGAAGGTGTGCTGTGAGGCATGCTGGAGGTACCAGAAGTGG	Chromosome	2	39	3944907	3944944	1.1e-13	Chromosome	44	90	3425580	3425534	5.1e-17
206526_1	CAAGCCTGCGAAGGTGTGCTGTGAGGCATGCTGGAGGTATCGCAAGCCTGCGAAGGTGTGCTGTGAGGCCTGCTGGAGGTATCAGAAGTGG	Chromosome	2	41	3425580	3425541	8.5e-15	Chromosome	44	90	2727981	2727935	5.1e-17
206530_1	CAAGCCTGCTAAGGTGTGCTGTGAGGCATGCTGGAGGTATCGCAAGCCTGCGAAGGTGTGCTGTGAGGCATGCTGGAGGTATCAGAAGTGG	Chromosome	2	41	3944907	3944946	4e-13	Chromosome	44	90	3425580	3425534	1.1e-18
209991_1	CAATCACGCCACGCAGGGGGTCGCGGGTTCGAGTCCCGTCCGTTCCACGCAGGGGGTCGCGGGTTCGAGTCCCGTCCGTTCCGC	Chromosome	10	46	236967	237003	3.6e-13	Chromosome	46	84	228964	229002	2.7e-14
211404_1	CAATCCGGGATTACACACGCTGGTTTAATCACGCAATCCGGGATTACACACGCTGGTTC	Chromosome	1	25	1301121	1301145	4.7e-05	Chromosome	25	42	3295381	3295364	0.0078
211410_1	CAATCCGGGATTACACATGCTGGTTTAATCACGCAATCCGGGAATACACATGCTGGTTC	Chromosome	1	25	1301121	1301145	1e-06	Chromosome	25	42	3295381	3295364	0.0078
211414_1	CAATCCGGGATTACACATTCTGGTTTAATCACGCAATCCGGGATTACACATTCTGGTTC	Chromosome	1	25	1301121	1301145	4.7e-05	Chromosome	25	42	3295381	3295364	0.0078
211447_1	CAATCCGTATGTCACTGGTTCGAGTCCAGTCAGAGGAGCAGTATGTCACTGGTTCGAGTCCAGTCAGAGGAGC	Chromosome	2	39	2044585	2044622	8.2e-14	Chromosome	41	73	2058061	2058029	4.9e-11
211444_1	CAATCCGTATGTCACTGGTTCGAGTCCAGTCAGAGGAGCAGCGTATGTCACTGGTTCGAGTCCAGTCAAAGGAGC	Chromosome	2	39	2044585	2044622	8.5e-14	Chromosome	42	75	2059891	2059924	6.6e-10
211927_1	CAATCTTATGCGGCGTGGTGTCGATGGGAAAAGTTTTATCGGAATGCGTGTTCTGGTGAACTTTTGGCTTACGGTTGTGA	Chromosome	1	31	3995201	3995231	7.2e-10	Chromosome	28	80	2942713	2942765	4.2e-22
212517_1	CAATGCGCCCAGCGCCAGCTGTCTGCGCTGGGTGTGCGTAAGCAATGCGCCCAGCGCCAGCTGTCTGCGCTGGGTATGCGTAATCTGGCGG	Chromosome	20	41	936423	936444	8.6e-05	Chromosome	44	61	3563812	3563829	0.014
212737_1	CAATGCTGTGTGTAGTCTTTGCCCATCTCCCAGGGCTGATTTATTACTACACACAGCAGTGCAG	Chromosome	4	32	1770433	1770461	6.8e-09	Chromosome	32	63	1103308	1103277	1.5e-10
213442_1	CAATTATTGCCGATGACCATCCGGTTGTCACCCAGAAGAAGTCACAGTACGG	Chromosome	2	29	2316194	2316221	3.8e-05	Chromosome	33	51	3319337	3319355	0.0018
213685_1	CAATTCTTTCAGCGGAAATTTTTCCTCAAAGGCCTTATTTAACGCAATTCTTTCAGCGGAAATTTTTCCTCAAAGGCCTTATTTAGCCG	Chromosome	2	41	1532459	1532420	3.8e-13	Chromosome	46	89	3625021	3624978	2.3e-15
215815_1	CACAACAGCCCGATATCGTTAATCACGAACAACAGCCCGATATCGTG	Chromosome	11	28	2475065	2475048	0.0053	Chromosome	29	46	2174690	2174673	0.0053
215825_1	CACAACAGCTCGATATCGTTAATCACGAACAACAGCCCGATATCGTG	Chromosome	11	28	2475065	2475048	0.0053	Chromosome	29	46	2174690	2174673	0.0053
215824_1	CACAACAGCGCGATATCGTTAATCACGCACAACAGCCCGATATCGTG	Chromosome	9	27	2475067	2475049	0.0015	Chromosome	29	46	2174690	2174673	0.0053
216136_1	CACAAGGAGGTGGTCGGCGGTTCGATCCCGTCATCACGCACAAGGAGGTGGTCGGCGGTTCGATCCCGTCATCACCCACCAG	Chromosome	2	41	2520965	2521004	1.6e-11	Chromosome	40	81	780799	780840	2.7e-14
216134_1	CACAAGGAGGGGGTCGGCGGTTCGATCCCGTCATCACCCACAAGGAGGGGGTCGGTGGTTCGATCCCGTCATCACCCACCG	Chromosome	2	41	2520965	2521004	7.3e-15	Chromosome	40	80	781102	781142	9.4e-14
216133_1	CACAAGGAGGGGGTCGGCGGTTCGATCCCGTCATCACCCACAAGGAGGGGGTCGGCGGTTCGATCCCGACATCACCCACCAG	Chromosome	2	41	2521085	2521124	7.4e-15	Chromosome	40	81	780799	780840	2.7e-14
216130_1	CACAAGGAGGGGGTCGGCGGTTCGATCCCGTCATCACCCACAAGGAGGGAGTCGGCGGTTCGATCCCGTCATCACCCACCAG	Chromosome	2	41	781102	781141	7.4e-15	Chromosome	40	81	2521085	2521126	2.7e-14
216131_1	CACAAGGAGGGGGTCGGCGGTTCGATCCCGTCATCACCCACAAGGAGGGGGTCAGCGGTTCGATCCCGTCATCACCCACCAG	Chromosome	2	41	780799	780838	7.4e-15	Chromosome	40	81	2521085	2521126	2.7e-14
216387_1	CACAATGAGTAGCGTAGATATTCTGGTCCCTGACCTGCCTGATGTTGATTGGAATCCCAAATCATAAAAATCAAATGCTGCGGCTCAATAG	Chromosome	1	42	761518	761559	6.6e-16	Chromosome	42	89	1074757	1074710	3.1e-14
218492_1	CACATGCAAGTCGAACGGTAACAGGAAACAGCTTGCTGCAGAAGTCGAACGGTAACAGGAAGCAGCTTGCTGC	Chromosome	1	38	3941859	3941896	8.2e-14	Chromosome	42	73	2731099	2731068	1.8e-10
220555_1	CACCTCCTTACCTTAAAGAAGCGTACTTTGCAGTGCTCACTCACGCACCTCCTTACCTTAAAGAAGCGTACTTTGCAGTGCTCACACAG	Chromosome	1	43	225303	225345	8.3e-15	Chromosome	46	89	3427230	3427187	4.9e-17
220630_1	CACCTCGCTTAGGCCTGTGTCCACATCACGCACCTCGCTTAGGCCTGTGTCCATATCACGTG	Chromosome	2	30	316443	316471	1.4e-05	Chromosome	32	62	391749	391719	2.3e-08
220551_1	CACCTCCTTACCTTAAAGAAGCGTACTTTGCAGTGATCACACACCTCCTTACCTTAAAGAAGCGTACTTTGCAGTGCTCACACAG	Chromosome	1	43	225303	225345	7.8e-15	Chromosome	42	85	3427230	3427187	4.6e-17
220645_1	CACCTCGCTTAGGCCTGTGTCCGTATCACGCACCTCGCTTAGGCCTGTGTCCATATCACGCG	Chromosome	2	30	316443	316471	1.4e-05	Chromosome	32	60	391749	391721	3e-07
220966_1	CACCTTGAGCAGCTGCAAAAACACCAGGGAAACACCTTTCCCTGGTGTTGGCGCAGTATTCA	Chromosome	1	39	3933609	3933647	3.9e-11	Chromosome	37	61	3350642	3350666	1.1e-06
220965_1	CACCTTGAGCAGCTGCAAAAACACCAGGGAAAAACCTTTCCCTGGTGTTGGCGCAGTATTCG	Chromosome	1	39	3933609	3933647	3.9e-11	Chromosome	37	62	3350642	3350667	3e-07
220963_1	CACCTTGAGCACCTGCAAAAACACCAGGGAAATACCTTTCCCTGGTGTTGGCGCAGTATTCA	Chromosome	1	39	3933609	3933647	3.9e-11	Chromosome	37	61	3350642	3350666	1.1e-06
220968_1	CACCTTGAGCAGCTGCAAAAACACCAGGGAAATACCCTTCCCTGGTGTTGGCGCAGTATTCA	Chromosome	1	39	3933609	3933647	8.3e-13	Chromosome	38	61	3350643	3350666	3.9e-06
220969_1	CACCTTGAGCAGCTGCAAAAACACCAGGGAAATACCTCTCCCTGGTGTTGGCGCAGTATTCA	Chromosome	1	36	3933609	3933644	8.3e-13	Chromosome	39	61	3350644	3350666	1.4e-05
220967_1	CACCTTGAGCAGCTGCAAAAACACCAGGGAAATACCATTCCCTGGTGTTGGCGCAGTATTCA	Chromosome	1	39	3933609	3933647	1.8e-14	Chromosome	38	61	3350643	3350666	3.9e-06
220973_1	CACCTTGAGCAGCTGCAAAAACACCAGGGAAATACCTTTCCCTGGTGTTGGCTCAGTATTCA	Chromosome	1	39	3933609	3933647	8.3e-13	Chromosome	37	61	3350642	3350666	5e-05
220971_1	CACCTTGAGCAGCTGCAAAAACACCAGGGAAATACCTTTCCCTGGTGTTGGCGCAGTGTTCA	Chromosome	1	39	3933609	3933647	8.3e-13	Chromosome	37	61	3350642	3350666	5e-05
220972_1	CACCTTGAGCAGCTGCAAAAACACCAGGGAAATACCTTTCCCTGGTGTTGGCGCATTATTCA	Chromosome	1	39	3933609	3933647	8.3e-13	Chromosome	37	61	3350642	3350666	5e-05
220987_1	CACCTTGAGCAGCTGCAAAAACACGAGGGAAATACCTTTCCCTGGTGTTGGCGCAGTATTCA	Chromosome	1	39	3933609	3933647	3.9e-11	Chromosome	37	61	3350642	3350666	1.1e-06
220989_1	CACCTTGAGCAGCTGCAGAAACACCAGGGAAATACCTTTCCCTGGTGTTGGCGCAGTATTCA	Chromosome	1	39	3933609	3933647	3.9e-11	Chromosome	37	61	3350642	3350666	1.1e-06
220994_1	CACCTTGAGGAGCTGCAAAAACACCAGGGAAATACCTTTCCCTGGTGTTGGCGCAGTATTCA	Chromosome	1	39	3933609	3933647	3.9e-11	Chromosome	37	61	3350642	3350666	1.1e-06
220995_1	CACCTTGAGTAGCTGCAAAAACACCAGGGAAATACCTTTCCCTGGTGTTGGCGCAGTATTCA	Chromosome	1	39	3933609	3933647	3.9e-11	Chromosome	37	61	3350642	3350666	1.1e-06
221394_1	CACGAACAAGGAGGGGGTCGGCGGTTCGATCCCGTCATCACCCACAACAAGGAGGGGGTCGGCGGTTCGATCCCGTCATCACCCAC	Chromosome	6	48	781102	781144	7.9e-15	Chromosome	47	86	2521085	2521124	7.9e-15
221591_1	CACGACGCACGTCCGATCTCTCATCACGATATTTGTGTTGATCATATTTGTGTTGATCCTATTT	Chromosome	29	46	1335588	1335571	0.0088	Chromosome	45	64	2560305	2560286	0.00068
221680_1	CACGACGCTTTCCGATCTGCTATCACGATAAGCAGTAAGCCGGTCATAAGCAGTAAGCCGGTCATAA	Chromosome	29	49	3946825	3946845	0.0002	Chromosome	47	67	228881	228901	0.0002
222071_1	CACGCAAGGGGTCGCGGGTTCGAGTCCCGTCCGTTCCGCCCACGCACGCAAGGGGTCGCGGGTTCGAGTCCCGTCCGTTCCGCCACCCTG	Chromosome	1	40	236967	237006	3.9e-13	Chromosome	45	89	3946908	3946952	6.5e-16
222073_1	CACGCAAGGTGTCGCGGGTTCGAGTCCCGTCCGTTCCGCCACACGCACGCAAGGGGTCGCGGGTTCGAGTCCCGTCCGTTCCGCCACCCTG	Chromosome	1	42	228964	229005	1.4e-12	Chromosome	46	90	3946908	3946952	6.6e-16
222158_1	CACGCACGCAGGGGGTCGCGGGTTCGAGTCCCGTCCGTTCCGCCACGCAGGGGGTCGCGGGTTCGAGTCCCGTCCATTCCGCCA	Chromosome	5	46	228964	229005	5.9e-16	Chromosome	44	84	3946908	3946948	9.9e-14
222160_1	CACGCACGCAGGGGGTCGCGGGTTCGAGTCCCGTCCGTTCCGCCACGCAGGGGGTCGCGGGTTCGAGTCCCGTCCGTTCCG	Chromosome	5	46	3946908	3946949	5.6e-16	Chromosome	44	81	228964	229001	9.4e-14
222159_1	CACGCACGCAGGGGGTCGCGGGTTCGAGTCCCGTCCGTTCCGCCACGCAGGGGGTCGCGGGTTCGAGTCCCGTCCGT	Chromosome	5	46	3946908	3946949	5.2e-16	Chromosome	44	77	236967	237000	1.5e-11
222238_1	CACGCAGGGGGTCGAGGGTTCGAGTCCCGTCCGTTCCGCCAGAGGGTTCGAGTCCCGTCCGTTCCGCC	Chromosome	1	41	228964	229004	7.4e-14	Chromosome	44	68	236982	237006	1.2e-06
222239_1	CACGCAGGGGGTCGCGGGTTCGAGCACGCACGCAGGGGGTCGCGGGTTCGAGTCCCGTCCGTTCCGCCACCCTG	Chromosome	1	24	228964	228987	5e-06	Chromosome	29	73	3946908	3946952	1.1e-17
222236_1	CACGCAGGGGGTAGCGGGTTCGAGTCCCGTCCGTTCCGCCACACGCACGCAGGGGGTAGCGGGTTCGAGTCCCGTCCGTTCCGCCACCCTG	Chromosome	1	42	228964	229005	3.1e-14	Chromosome	46	90	3946908	3946952	6.6e-16
222240_1	CACGCAGGGGGTCGCGGGTTCGAGCCCCTTCCGTTCCGCCCACGCACGCAGGGGGTCGCGGGTTCGAGTCCCGTCCGTTCCGCCACCCTG	Chromosome	1	40	236967	237006	1.8e-11	Chromosome	45	89	3946908	3946952	1.4e-17
222242_1	CACGCAGGGGGTCGCGGGTTCGAGTCCCGCCCGTTCCGCCACACGCACGCAGGGGGTCGCGGGTTCGAGTCCCGCCCGTTCCGCCACCCTG	Chromosome	1	42	228964	229005	3.1e-14	Chromosome	46	90	3946908	3946952	6.6e-16
222231_1	CACGCAGGGCGTCGCGGGTTCGAGTCCCGTCCGTTCCGCCACACGCACGCAGGGGGTCGCGGGTTCGAGTCCCGTCCGTTCCGCCACCCTG	Chromosome	1	42	228964	229005	3.1e-14	Chromosome	46	90	3946908	3946952	1.4e-17
222244_1	CACGCAGGGGGTCGCGGGTTCGAGTCCCGTCCGTTCCACCACACGCACGCAGGGGGTCGCGGGTTCGAGTCCCGTCCGTTACACCACCCCG	Chromosome	1	42	228964	229005	3.1e-14	Chromosome	46	89	3946908	3946951	1.1e-13
222250_1	CACGCAGGGGGTCGCGGGTTCGAGTCCCGTCCGTTCCGCCACACGCACGCAGGGGGTCGCGGGTTCGAGTCCCGTCCGTTCCGCCACCATG	Chromosome	1	42	236967	237008	6.6e-16	Chromosome	46	88	3946908	3946950	1.8e-16
222251_1	CACGCAGGGGGTCGCGGGTTCGAGTCCCGTCCGTTCCGCCACACGCACGCAGGGGGTCGCGGGTTCGAGTTCCGTCCGTTCCGCCACCCTG	Chromosome	1	42	228964	229005	6.6e-16	Chromosome	46	90	3946908	3946952	6.6e-16
222256_1	CACGCAGGGGGTCGCGGGTTCGAGTCCCGTCCGTTCCGCCATCGCGGGTTCGAGTCCCGTCCGTTCCGCC	Chromosome	1	41	236967	237007	1.7e-15	Chromosome	42	70	3946919	3946947	7.7e-09
222254_1	CACGCAGGGGGTCGCGGGTTCGAGTCCCGTCCGTTCCGCCACGCGCACGCAGGGGGTCGCGGGTTCGAGTCCCGTCCGTTCCGCCACCCTG	Chromosome	1	42	228964	229005	6.6e-16	Chromosome	46	90	3946908	3946952	1.4e-17
222259_1	CACGCAGGGGGTCGCGGGTTCGAGTCCCGTCTGTTCCGCCACACGCACGCAGGGGGTCGCGGGTTCGAGTCCCGTCTGTTCCGCCACCCTG	Chromosome	1	42	236967	237008	3.1e-14	Chromosome	46	90	3946908	3946952	6.6e-16
222258_1	CACGCAGGGGGTCGCGGGTTCGAGTCCCGTCCGTTCTGCCCACGCACGCAGGGGGTCGCGGGTTCGAGTCCCGTCCGTTCTGCCACCCTG	Chromosome	1	40	236967	237006	3.9e-13	Chromosome	45	89	3946908	3946952	6.5e-16
222257_1	CACGCAGGGGGTCGCGGGTTCGAGTCCCGTCCGTTCCGCCCACGCACGCAGGGGGTCGCGGGTTCGAGTCCCGTCCGTTCCGCCATCCCG	Chromosome	1	40	228964	229003	8.4e-15	Chromosome	45	85	236967	237007	2.3e-15
222270_1	CACGCAGGGGGTCGCGGTTCGAGTCCCGTCCGTTCCGCCACTCACGCACGCAGGGGGTCGCGGTTCGAGTCCCGTCCGTTCCGCCACCCTG	Chromosome	1	42	228964	229006	1.4e-12	Chromosome	47	90	3946908	3946952	1.1e-13
222272_1	CACGCAGGGGGTCTCGGGTTCGAGTCCCGTCCGTTCCGCCCACGCACGCAGGGGGTCTCGGGTTCGAGTCCCGTCCGTTCCGCCACCCCG	Chromosome	1	40	236967	237006	3.9e-13	Chromosome	45	88	3946908	3946951	2.3e-15
222273_1	CACGCAGGGGGTTCGGGTTCGAGTCCCGTCCGTTCCGCCACTCACGCACGCAGGGGGTTCGGGTTCGAGTCCCGTCCGTTCCGCCACCCTG	Chromosome	1	42	228964	229006	6.6e-11	Chromosome	47	90	3946908	3946952	5.1e-12
222280_1	CACGCAGTGGGTCGCGGGTTCGAGTCCCGTCCGTTCCGCCCACGCACGCAGGGGGTCGCGGGTTCGAGTCCCGTCCGTTCCGCCACCCTG	Chromosome	1	40	228964	229003	3.9e-13	Chromosome	45	89	3946908	3946952	1.4e-17
222506_1	CACGCCGAAGGTGTTTTGGCGGATTAAGAGAAGATTTTCAGGCACGCCGAAGGTGTTTTGGCGGATTAAGAGAAGATTTTCAGC	Chromosome	2	41	4212950	4212989	3.6e-13	Chromosome	44	84	4040427	4040467	9.9e-14
222507_1	CACGCCGAAGGTGTTTTGGCGGATTGACAGAAGATTTTCAGGCACGCCGAAGGTGTTTTGGCGGATTGACAGAAGATTTTCAGC	Chromosome	2	41	4212950	4212989	3.6e-13	Chromosome	44	84	4040427	4040467	9.9e-14
222511_1	CACGCCGAAGGTGTTTTGGCGGATTGAGAGAAGATTTTCACGCACGCCGAAGGTGTTTTGGCGGATTGAGAGAAGATTTTCAGC	Chromosome	2	40	4040427	4040465	2.7e-14	Chromosome	44	84	4212950	4212990	2.1e-15
222504_1	CACGCCGAAGGCGTTTTGGCGGATTGAGAGAAGATTTTCAGGCACGCCGAAGGCGTTTTGGCGGATTGAGAGAAGATTTTCAGC	Chromosome	2	41	4212950	4212989	3.6e-13	Chromosome	44	84	4040427	4040467	9.9e-14
222502_1	CACGCCGAAAGTGTTTTGGCGGATTGAGAGAAGATTTTCAGCACGCCGAAGGTGTTTTGGCGGATTGAGAGAAGATTTTCAGC	Chromosome	2	42	4040427	4040467	9.7e-14	Chromosome	43	83	4212950	4212990	2.1e-15
222518_1	CACGCCGAAGGTGTTTTGGCGGATTGAGAGAAGATTTTCAGGCACGCCGAAGGAGGTGGGGCGGATTGAGAGAAGATTTTCAGC	Chromosome	2	41	4212950	4212989	7.6e-15	Chromosome	44	84	4040427	4040467	1e-08
222524_1	CACGCCGAAGGTGTTTTGGCGGATTGAGAGGAGATTTTCAGGCACGCCGAAGGTGTTTTGGCGGATTGAGAGGAGATTTTCAGC	Chromosome	2	41	4212950	4212989	3.6e-13	Chromosome	44	84	4040427	4040467	9.9e-14
222514_1	CACGCCGAAGGTGTTTTGGCGGATTGAGAGAAGATTTTCAGACGCACGCCGAAGGTGTTTTGGCGGATTGAGAGAAGATTTTCAGC	Chromosome	2	41	4212950	4212989	7.9e-15	Chromosome	46	86	4040427	4040467	2.2e-15
222520_1	CACGCCGAAGGTGTTTTGGCGGATTGAGAGAAGATTTTCAGGCACGCCGAAGGTGTTTTGGCGGATTGAGAGAAGATTTTAAGC	Chromosome	2	41	4040427	4040466	7.6e-15	Chromosome	44	84	4212950	4212990	9.9e-14
222857_1	CACGCTGGGGCTGGTGGCGATAATTTCAGTTACACGCACGCTGGGGCTGGTGGCGATAATTTCAGTTACCAGCCCGGCGGTT	Chromosome	38	56	3300638	3300620	0.0035	Chromosome	60	82	2822087	2822065	2.1e-05
225037_1	CACTAATTACAAGAACCAGGGGCGGAAATTCCAGCCCTCTCTGTGATTGTTTCCAGGGAGATTG	Chromosome	2	41	686843	686804	5.2e-15	Chromosome	43	63	1289157	1289137	0.0088
228762_1	CACTTGTCGGCATTATTACCGTGATCACGCACTTGTCGGCATTATTACCGG	Chromosome	5	27	4412642	4412620	0.00048	Chromosome	28	51	1303612	1303635	0.00013
229149_1	CAGAAACATAAGGAGTGAGAAAACACAAAACCGCACGTTAACGTTGGTACTATCGGTCACGTTGACCACAC	Chromosome	1	20	296064	296083	0.00079	Chromosome	25	69	3471305	3471261	4.7e-16
229547_1	CAGAACGGCGGACTGTTAATCGCAGAACGGCGGACTGTTAATCA	Chromosome	2	21	2059871	2059890	0.00036	Chromosome	24	43	2044569	2044588	0.00036
229955_1	CAGAATACCTGCCTGTCACGCAGGGGGTCGCGGGTTCGAGTCTGTCAGGGAGAGGTCCGCGTGCCCTACCTTACTCCGGCGCTGCAT	Chromosome	2	42	236952	236992	2.2e-15	Chromosome	46	84	2380658	2380620	6.3e-06
232142_1	CAGATTTTGAGTGCGGGACGCACTTCCTGAGCCCGAACGAAAAGTTTTATCGGAATGCAG	Chromosome	2	21	2999896	2999877	0.00062	Chromosome	20	58	2942694	2942732	7.9e-13
232309_1	CAGCAATAACATTGCGGTAGTGCATCTTTTAAAACCAGCGTAACAATATTCAGGTAGGCCTTTTCACAAACCCAGCGGGGGTTAACCCGC	Chromosome	1	41	3247703	3247743	2.3e-15	Chromosome	39	57	1245430	1245448	0.004
233248_1	CAGCCGCAGCACATGCAACTTGGAGTATGACGAGCATCACGCAGCCGCAGCACATGCAACTTGGAGTATGACGAG	Chromosome	1	34	438187	438154	6.6e-10	Chromosome	39	75	803362	803326	6.6e-10
233247_1	CAGCCGCAGCACATGCAACTTGAAGTGTGACGAGCATCACGCAGCCGCAGCACATGCAACTTGAAGTGTGACGAG	Chromosome	1	34	438187	438154	6.6e-10	Chromosome	39	75	803362	803326	6.6e-10
233250_1	CAGCCGCAGTACATGCAACTTGAAGTATGACGAGCATCACGCAGCCGCAGCACATGCAACTTGAAGTATGACGAG	Chromosome	1	37	253428	253464	6.6e-10	Chromosome	41	75	438188	438154	3.9e-12
234134_1	CAGCGGGGTTCTCCTGAGAACTCCGGCAGCAGCGGGGTTCTCCTGAGAACTCCGGCAG	Chromosome	1	29	4035274	4035302	5.8e-09	Chromosome	30	58	3941551	3941579	5.8e-09
234567_1	CAGCTGTACCAGGAACCACCTCCTTAGCCTGTGTAATCTCCCATTACACGGGCTTGTTCAATGGGGAGATGGTTCGCAGGGAG	Chromosome	2	58	2167141	2167196	9.7e-19	Chromosome	56	82	3952513	3952539	5.9e-06
234561_1	CAGCTGTACAAGGAACCACCTCCTTAGCCTGTGTAATCTCCCTTACACGGGCTTGTTCAATGGGGAGATGGTTCGCTGGGAG	Chromosome	2	57	2167141	2167196	2e-20	Chromosome	55	81	3952513	3952539	1.2e-07
234565_1	CAGCTGTACCAGGAACCACCTCCTTAGCCTGAGTAATCTCCCTTACGCGGGCTTGTTCAATGGGGAGATGGTTCGCTGGGAG	Chromosome	2	57	2167141	2167196	9.5e-19	Chromosome	55	81	3952513	3952539	1.2e-07
234570_1	CAGCTGTACCAGGAACCACCTCCTTAGCCTGTGTAATCTCCCTTACACGGGCTTGTTCAACGGGGAGATGGTTCGCTGGGAG	Chromosome	2	57	2167141	2167196	4.4e-22	Chromosome	55	81	3952513	3952539	5.8e-06
234568_1	CAGCTGTACCAGGAACCACCTCCTTAGCCTGTGTAATCTCCCCTACACGGGCTTGTTCAATGGGGAGATGGTTCGCTGGGAG	Chromosome	2	57	2167141	2167196	2e-20	Chromosome	55	81	3952513	3952539	1.2e-07
234571_1	CAGCTGTACCAGGAACCACCTCCTTAGCCTGTGTAATCTCCCTTACACGGGCTTGTTCAATGGAGAGATGGTTCGCTGGGAG	Chromosome	2	57	2167141	2167196	4.4e-22	Chromosome	55	81	3952513	3952539	5.8e-06
234569_1	CAGCTGTACCAGGAACCACCTCCTTAGCCTGTGTAATCTCCCTTACACGGACTTGTTCAATGGGGAGATGGTTCGCTGGGAG	Chromosome	2	57	2167141	2167196	2e-20	Chromosome	55	81	3952513	3952539	1.2e-07
234574_1	CAGCTGTACCAGGAACCACCTCCTTAGCCTGTGTAATCTCCCTTACACGGGCTTGTTCAATGGGGAGATGGTACGCTGGGAG	Chromosome	2	57	2167141	2167196	4.4e-22	Chromosome	55	81	3952513	3952539	5.8e-06
234575_1	CAGCTGTACCAGGAACCACCTCCTTAGCCTGTGTAATCTCCCTTACACGGGCTTGTTCAATGGGGAGATGGTTCACTGGGAG	Chromosome	2	57	2167141	2167196	4.4e-22	Chromosome	55	81	3952513	3952539	5.8e-06
234576_1	CAGCTGTACCAGGAACCACCTCCTTAGCCTGTGTAATCTCCCTTACACGGGCTTGTTCAATGGGGAGATGGTTCGCTGAG	Chromosome	2	57	2167141	2167196	4.2e-22	Chromosome	55	78	3952513	3952536	5.6e-06
234578_1	CAGCTGTACCAGGAACCACCTCCTTAGCCTGTGTAATCTCCCTTACACGGGCTTGTTCAGTGGGGAGATGGTTCGCTGGGAG	Chromosome	2	57	2167141	2167196	4.4e-22	Chromosome	55	81	3952513	3952539	5.8e-06
234577_1	CAGCTGTACCAGGAACCACCTCCTTAGCCTGTGTAATCTCCCTTACACGGGCTTGTTCAATGGTGAGATGGTTCGCTGGGAG	Chromosome	2	57	2167141	2167196	4.4e-22	Chromosome	55	81	3952513	3952539	5.8e-06
234579_1	CAGCTGTACCAGGAACCACCTCCTTAGCCTGTGTAATCTCCCTTATACGGGCTTGTTCAATGGGGAGATGGTTCGCTGGGAG	Chromosome	2	57	2167141	2167196	2e-20	Chromosome	55	81	3952513	3952539	1.2e-07
234581_1	CAGCTGTACCAGGAACCACCTCCTTAGCCTGTGTAATCTTCCTTACACGGGCTTGTTCAATGGGGAGATGGTTCGCTGGGAG	Chromosome	2	57	2167141	2167196	2e-20	Chromosome	55	81	3952513	3952539	1.2e-07
234587_1	CAGCTGTACCAGGAACCACCTCCTTTTCCTGTGTAATCTCCCTTACACGGGCTTGTTCAATAGGGAGATGGTTCGCTGGGAG	Chromosome	2	57	2167141	2167196	9.5e-19	Chromosome	55	81	3952513	3952539	5.8e-06
234586_1	CAGCTGTACCAGGAACCACCTCCTTGGCCTGTGTAATCTCCCTTACACGGGCTTGTTCAATGGGGAGATGGTTCGCTGGGAG	Chromosome	2	57	2167141	2167196	2e-20	Chromosome	55	81	3952513	3952539	1.2e-07
234604_1	CAGCTGTACCAGGAATCACCTCCTTAGCCTGTGTAATCTCCCTTACACGGGCTTGTTCAATGGGGAGATGGTTCGCTGGGAG	Chromosome	2	57	2167141	2167196	2e-20	Chromosome	55	81	3952513	3952539	1.2e-07
234611_1	CAGCTGTACGAGGAACCACCTCCTTAGCCTGTGTAATCTCCCTTACACGGGCTTGTTCAATGGGGAGATGGTTCGCTGGGAG	Chromosome	2	57	2167141	2167196	2e-20	Chromosome	55	81	3952513	3952539	1.2e-07
234630_1	CAGCTGTATCAGGAACCACCTCCTTAGCCTGTGTAATCTCCCTTACACGGGCTTGTTCAATGGGGAGATGGTTCGCTGGGAG	Chromosome	2	57	2167141	2167196	2e-20	Chromosome	55	81	3952513	3952539	1.2e-07
234631_1	CAGCTGTATTAGGAACCACCTCCTTAGCCTGTGTAATCTCCCTTACACGGGCTTGTTCAATGGGGAGATGGTTCGCTGGGAG	Chromosome	2	57	2167141	2167196	9.5e-19	Chromosome	55	81	3952513	3952539	1.2e-07
234650_1	CAGCTGTGCCAGGAACCACCTCCTTAGCCTGTGTAATCTCCCTTACACGGGCTTGTTCAATGGGGAGATGGTTCGCTGGGAG	Chromosome	2	57	2167141	2167196	2e-20	Chromosome	55	81	3952513	3952539	1.2e-07
234719_1	CAGCTTTACCAGGAACCACCTCCTTAGCCTGTGTAATCTCCCCTTAAACGGGCTTGTTCAATGGGGAGATGGTTCGCTGGGAG	Chromosome	2	58	2167141	2167196	2.1e-15	Chromosome	56	82	3952513	3952539	1.3e-07
234778_1	CAGGAAAGTACTGCCGAATTAGCCCATTTGTCGCAGGAAAGTACTGCCGAATTAGCCCATTTGTA	Chromosome	2	31	279966	279937	1.9e-09	Chromosome	35	65	271616	271586	5.4e-10
235464_1	CAGGCAGTTTTGCGTTTGTCAGCACTCTCAGACCAGCCCATGTTCGCTTGCTGTGAGTGAAGCGTTATCGCTTTTCACGTG	Chromosome	6	38	2549465	2549433	5.7e-11	Chromosome	40	80	2816953	2816913	9.4e-14
236182_1	CAGGGCTATAGCTCAGCTGGGAGAGCGCCTGCTTTGCACGCCGCAGGGCTATAGCTCAGCTGGGAGAGCGCCTGCTTTGCACGCAGGAGGC	Chromosome	3	41	3427032	3426994	3.1e-14	Chromosome	46	90	225501	225545	1.4e-17
236408_1	CAGGGTACAGAGGTAAGATGTTCTATCTTTCAGCATGGCTAATGGCAGTGATAAGTCGGATGCGTACGAAGTG	Chromosome	2	33	4049901	4049932	1.8e-10	Chromosome	34	64	1620141	1620171	1.4e-06
237229_1	CAGGTTTCTGTGCCGCTGGCTGCCGTGCTCTATCACGCAGGTTTCTGAGCAGAAGGCAGAAGAGCCC	Chromosome	1	29	3376533	3376505	7.3e-09	Chromosome	34	51	1538065	1538082	0.0095
238011_1	CAGTCATTTCGGCAAGGGTTCCTCCCATTGTGAATCTCTCAGGAGACAGGAATGAAAGAA	Chromosome	2	25	1741269	1741292	3.7e-06	Chromosome	27	58	3196778	3196747	6.1e-09
238589_1	CAGTGATTTTGCACGCAGCACGTACTGTCATAACCCATAAAATGCTAGTTGTACCAGCAACCACCACCTTAC	Chromosome	2	30	1517095	1517067	8.1e-09	Chromosome	29	71	2167123	2167165	1.3e-11
238620_1	CAGTGATTTTTCTGGTAAAAATTATCACGTGAGAGCGCAATATAGTCATGCTGTCTGCGGGCTACGACTCACAC	Chromosome	2	26	122855	122879	1.4e-06	Chromosome	27	73	3379119	3379165	3.9e-12
240198_1	CATAAAAGCGCGGCAACTAAACGATATCACGCATAAAAGCGCAGCAACTAAACAG	Chromosome	2	23	122906	122927	4.2e-05	Chromosome	25	42	3561661	3561678	0.007
240202_1	CATAAAAGCGCGGCAACTAAATGATATCACGCATAAAAGCGCAGCAACTACACGG	Chromosome	2	21	122906	122925	0.00054	Chromosome	25	42	3561661	3561678	0.007
240312_1	CATAAAATCAAAGCAATAAGCGGAAGTAGCACTGTCTGTGGAGCCTACGGGCTTCACAGGCTTTGTG	Chromosome	2	21	1991800	1991781	0.00073	Chromosome	24	66	1800088	1800046	5.6e-15
241595_1	CATAACTAAATCCAACGTTTATCACGCATAACTAAAGCCAACGTG	Chromosome	5	22	1019675	1019658	0.0049	Chromosome	25	45	4158332	4158312	0.0049
242648_1	CATACGGAAGGCGCGAAGATGAAAAACACAGTCACCGTCGCGCCTTCGCGCGC	Chromosome	2	29	742810	742837	1.8e-08	Chromosome	31	53	2339811	2339789	1.1e-05
242649_1	CATACGGAAGGCGCGAAGATGAAAAACACCGCCACCGTCGCGCCTTCGCGCGC	Chromosome	2	31	742810	742839	1.4e-09	Chromosome	33	53	2339809	2339789	0.00014
242668_1	CATACGGGCGATGACAAATGCAAAACTGCCTGATGCGCTACGCTTATAAGGCCTGGAAAG	Chromosome	1	27	3101801	3101775	8e-08	Chromosome	28	46	4478909	4478891	0.0022
242669_1	CATACGGGCGATGACAAATGCAAAACTGCCTGATGCGCTACGCTTATCAAGCCTGGAAAG	Chromosome	1	27	3101801	3101775	8e-08	Chromosome	28	46	4478909	4478891	0.0022
242670_1	CATACGGGCGATGACAAATGCAAAACTGCCTGATGCGCTACGCTTATCAGGAATGGAAAG	Chromosome	1	27	3101801	3101775	8e-08	Chromosome	28	46	4478909	4478891	0.0022
242671_1	CATACGGGCGATGACAAATGCAAAACTGCCTGATGCGCTACGCTTATCAGGCCGGGAAAG	Chromosome	1	27	3101801	3101775	8e-08	Chromosome	28	46	4478909	4478891	0.0022
242672_1	CATACGGGCGATGACAAATGCAAAACTGCCTGATGCGCTACGCTTATCAGGCCTGGAAAA	Chromosome	1	27	3101801	3101775	8e-08	Chromosome	28	46	4478909	4478891	0.0022
244310_1	CATATGGGCGATGACAAATGCAAAACTGCCTGATGCGCTACGCTTATCAGGCCTGGAAAG	Chromosome	1	27	3101801	3101775	3.7e-06	Chromosome	28	46	4478909	4478891	0.0022
244517_1	CATATTACATTGCAACATTTACGCGCAAAAACTAATCCAAGAACCAGGGGCGGAAATTCCAGCCCTCTCGATTGTTACGTAGCAAGGA	Chromosome	2	38	987464	987428	3.8e-13	Chromosome	38	88	686835	686785	2.9e-19
245144_1	CATATTTTAGCCGCCCCAGTCAGTGGCGGAAATTCCAGCCATCTCGATTGTTACGTAGCACGGG	Chromosome	2	24	4049965	4049987	1.5e-05	Chromosome	21	63	686828	686786	2.4e-13
245398_1	CATATTTTTGTGACCGGCGGGGTCGGCATCACGAATATTTTTGTGACCGGCAGGGTCGC	Chromosome	2	25	2909653	2909630	3.6e-06	Chromosome	24	45	3726977	3726998	0.0022
246558_1	CATCACGTCAAGGTCGGGGTCACGAGTTCGAGTCTCGTTTCCCGCTCCAGGTCGGGGTCACGAGTTCGAGTCTCGTTTCCCGCTC	Chromosome	9	50	1992082	1992041	2.8e-14	Chromosome	49	85	4392620	4392656	1.7e-11
248305_1	CATCCTGCTGTTTTACCGGACGCATCCTGCTGTTTTACCGGC	Chromosome	2	20	2857171	2857189	0.0012	Chromosome	21	38	602712	602729	0.0043
248559_1	CATCGACACGGCGGATGTGAATCACCACGCATCGACACGGCGGATGTGAATCACTA	Chromosome	1	25	4207862	4207886	9.2e-07	Chromosome	30	55	223484	223509	2.6e-07
248564_1	CATCGACACGGCGGATGTGAATCACTCATCGACACGGCGGATGTGAATCACTA	Chromosome	1	26	4207862	4207887	2.3e-07	Chromosome	27	52	223484	223509	2.3e-07
248561_1	CATCGACACGGCGGATGTGAATCACTACGCATCGAAACGGCGGATGTGAATCACTA	Chromosome	1	26	223484	223509	2.6e-07	Chromosome	30	55	4207862	4207887	1.2e-05
249865_1	CATCGGTTCTGGCCTCGGTAAAACCAGAGGTAAGATGTTCTATCTTTCAGACCTTTTACTGCAAGG	Chromosome	2	25	3444473	3444450	4.3e-06	Chromosome	25	63	4049907	4049945	9.1e-13
253052_1	CATGACGGTCGCGGTCAATGGCGTTCACGCCATAGTTTGCGATTCTGACGAGCTGGAAATCCCGATCAATGC	Chromosome	2	30	552218	552190	3.7e-07	Chromosome	33	57	2088962	2088938	6.3e-05
254357_1	CATGCCGAAGGTGTTTTGGCGGATTGAGAGAAGATTTTCAGGCACGCCGAAGGTGTTTTGGCGAATTGAGAGAAGATTTTCAGC	Chromosome	4	41	4212952	4212989	9.9e-14	Chromosome	44	84	4040427	4040467	9.9e-14
254621_1	CATGCGGGCGATGACAAATGCAAAACTGCCTGATGCGCTACGCTTATCAGGCCTGGAAAG	Chromosome	1	27	3101801	3101775	3.7e-06	Chromosome	28	46	4478909	4478891	0.0022
256705_1	CATGGTCTGGAAGCTGCTTTCGACACAGACTGAAGAAATTCTGACATCTCGAACGGACGATTATCGCA	Chromosome	2	21	4181384	4181403	0.00075	Chromosome	26	68	4190449	4190406	5.8e-05
256941_1	CATGGTTCAGTGTGTTCGATATTTTGTCCATCACGCATGGTTCAGTGTGTTCGATATTTTGTC	Chromosome	19	36	518351	518368	0.0086	Chromosome	37	63	4472533	4472507	4e-06
257930_1	CATGTTGGCTTCAGGTTTTGTGAAAAACATAACCCAGAAAATACA	Chromosome	2	20	4399912	4399930	0.0014	Chromosome	21	42	2167116	2167137	0.0014
258654_1	CATTAAGAAGTTTAATTCTTTGAGCAAACACGTCACGCATTAAGAAGTTTAATTCTTTGAGCAAACA	Chromosome	1	26	3941772	3941797	1.6e-05	Chromosome	27	63	4208100	4208136	1.2e-06
258779_1	CATTAAGCAGTAAGCCGGTCATAAAACCACGCATTAAGCAGTAAGCCGGTCATAAAACG	Chromosome	2	28	228879	228905	7.7e-08	Chromosome	33	58	3946823	3946848	2.8e-07
258800_1	CATTAAGCAGTAAGCCGGTCATAAAAGCATTAAGCAGTAAGCCGGTCATAAAAA	Chromosome	2	26	3946823	3946847	8.7e-07	Chromosome	29	53	228879	228903	8.7e-07
259804_1	CATTACGAAGTTTAATTCTTTGAGCGTCAAACCACGCATTACGAAGTTTAATTCTTTGAGCGTCAAACA	Chromosome	1	32	4166623	4166654	1.6e-10	Chromosome	37	68	4035495	4035526	1.6e-10
259812_1	CATTACGAAGTTTAATTCTTTGAGCGTCAAACGCATTACGAAGTTTAATTCTTTGAGCGTCAAACA	Chromosome	1	32	4035495	4035526	1.5e-10	Chromosome	34	65	4166623	4166654	1.5e-10
259816_1	CATTACGAAGTTTAATTCTTTGAGCGTCCAACACGCATTACGAAGTTTAATTCTTTGAGCGTCAAACA	Chromosome	1	32	4166623	4166654	7.4e-09	Chromosome	36	67	4035495	4035526	1.6e-10
259912_1	CATTACGCCGCATTGGTCACCAGGCGGTTAATCACGCATTACGCCGCATTGGTAACCAGGCGGTGCACGG	Chromosome	11	28	4486916	4486933	0.01	Chromosome	32	69	4586513	4586476	1.7e-10
260285_1	CATTAGATCTGTACGGTAAAGTTTAACCATCAACCTGCTTACGTCCTGCGGGAAGATGG	Chromosome	2	22	2312657	2312637	0.00017	Chromosome	22	59	1122835	1122798	1.3e-10
260412_1	CATTAGCGATATCAGAAAAGATGCGTATCACGCATTAGCGAAATCAGAAAAGATGCG	Chromosome	2	24	192875	192897	1.2e-05	Chromosome	23	40	1271531	1271548	0.0074
260415_1	CATTAGCGATATCAGAAAAGATGCGTATCACGCATTAGCGATCTCAGAAAAGATGCT	Chromosome	2	24	192875	192897	1.2e-05	Chromosome	23	40	1271531	1271548	0.0074
260523_1	CATTAGGCAGTAAGCCGGTCATAAAAGCATTAGGCAGTAAGCCGGTCATAAAAA	Chromosome	2	26	3946823	3946847	4e-05	Chromosome	29	53	228879	228903	4e-05
261466_1	CATTCAAAAAGCAGTATCACGCATTCAAAAAGCAGTATTT	Chromosome	2	21	3099464	3099445	0.0003	Chromosome	23	40	3982717	3982734	0.0039
262224_1	CATTCCCGCAGCAGATTATGACATCACGCATTACCGCAGCAGATTATGG	Chromosome	1	21	838543	838563	0.00012	Chromosome	21	41	3909824	3909844	0.0057
262531_1	CATTCCGGTCGATACTAAACAGCGAGACCACAGCAAAGGGAACGGACATTGCAGAATCAAAGAGA	Chromosome	1	20	3073068	3073049	0.0007	Chromosome	25	42	3710590	3710607	0.009
263494_1	CATTCGGTGAGCGGTAGTTCAGTCGGTTAGAATACCTGCCTATCACGCATTCGGTGAGCGGTAGTTCAGTCGGTTAGAATACCTGCCTGTG	Chromosome	2	49	3946865	3946913	3.1e-14	Chromosome	49	90	228921	228963	1.4e-12
263502_1	CATTCGGTGGAGCGGTAGTTCAGTCGGTTAGAATACCCGCCGCATTCGGTGGAGCGGTAGTTCAGTCGGTTAGAATACCCGCCTGTG	Chromosome	2	41	228921	228960	3.7e-13	Chromosome	44	86	3946865	3946907	8e-15
263501_1	CATTCGGTGGAGCGGTAGTTCAGTCGGTTAGAATACCCGCACGCATTCGGTGGAGCGGTAGTTCAGTCGGTTAGAATACCCGCCTGTG	Chromosome	2	40	228921	228959	1.4e-12	Chromosome	45	87	3946865	3946907	8.1e-15
263506_1	CATTCGGTGGAGCGGTAGTTCAGTCGGTTAGAATACCTACGCATTCGGTGGAGCGGTAGTTCATTCGGTTAGAATACCTGCCTGTG	Chromosome	2	38	3946865	3946901	3.7e-13	Chromosome	43	85	228921	228963	7.9e-15
263508_1	CATTCGGTGGAGCGGTAGTTCAGTCGGTTAGAATACCTGCACGCATTCGGTGGAGAGGTAGTTCAGTCGGTTAGAATACCTGCCTGTG	Chromosome	2	40	3946865	3946903	2.9e-14	Chromosome	45	87	228921	228963	8.1e-15
265911_1	CATTGCCGAATATGCCGACACACGACAAGTTTTATCGGAATGCGTGTTCTGGTGAACATTTGGC	Chromosome	1	18	2353291	2353308	0.0088	Chromosome	22	64	2942711	2942753	2.4e-13
266202_1	CATTGCTGTATGTAGTCTTTGCCCATCTCCCAGGGCTGATTTATTACTACACACAGCAGTGCAG	Chromosome	2	32	1770431	1770461	2.4e-08	Chromosome	32	63	1103308	1103277	1.5e-10
266204_1	CATTGCTGTGTAGTCTTTGCCCATCTCCCAGGGCTGATTTATTACTACACACAGCAGTGCAG	Chromosome	7	30	1770438	1770461	3.9e-06	Chromosome	30	61	1103308	1103277	1.4e-10
266208_1	CATTGCTGTGTGTAGTCTTTGCCCAACTCCCAGGGCTGATTTATTACTACACACAGCAGTGCAG	Chromosome	2	32	1770431	1770461	2.4e-08	Chromosome	32	63	1103308	1103277	1.5e-10
266210_1	CATTGCTGTGTGTAGTCTTTGCCCACCTCCCAGGGCTGATTTATTACTACACACAGCAGTGCAG	Chromosome	2	32	1770431	1770461	2.4e-08	Chromosome	32	63	1103308	1103277	1.5e-10
266225_1	CATTGCTGTGTGTAGTCTTTGCCCATCTCCCAGGGCCGATTTATTACTACACACAGCAGTGCAG	Chromosome	2	32	1770431	1770461	5.2e-10	Chromosome	32	63	1103308	1103277	6.8e-09
266226_1	CATTGCTGTGTGTAGTCTTTGCCCATCTCCCAGGGCTAATTTATTACTACACACAGCAGGGCAG	Chromosome	2	32	1770431	1770461	5.2e-10	Chromosome	32	63	1103308	1103277	3.2e-07
266227_1	CATTGCTGTGTGTAGTCTTTGCCCATCTCCCAGGGCTGATTATTACTACACACAGCAGTGCAG	Chromosome	2	32	1770431	1770461	5.1e-10	Chromosome	32	62	1103308	1103277	1.1e-06
266228_1	CATTGCTGTGTGTAGTCTTTGCCCATCTCCCAGGGCTGATTTAATACTACACACAGCAGTGCAG	Chromosome	2	32	1770431	1770461	5.2e-10	Chromosome	32	63	1103308	1103277	6.8e-09
266229_1	CATTGCTGTGTGTAGTCTTTGCCCATCTCCCAGGGCTGATTTATTACTACAAACAGAAGTGCAG	Chromosome	2	32	1770431	1770461	5.2e-10	Chromosome	32	63	1103308	1103277	3.2e-07
266230_1	CATTGCTGTGTGTAGTCTTTGCCCATCTCCCAGGGCTGATTTATTACTACACACAGCAATGCAG	Chromosome	2	32	1770431	1770461	5.2e-10	Chromosome	32	63	1103308	1103277	6.8e-09
266231_1	CATTGCTGTGTGTAGTCTTTGCCCATCTCCCAGGGCTGATTTATTACTACACACAGCAGTAAAG	Chromosome	2	32	1770431	1770461	5.2e-10	Chromosome	32	60	1103308	1103280	6.8e-09
266233_1	CATTGCTGTGTGTAGTCTTTGCCCATCTCCCAGGGCTGATTTATTACTACACACAGCCGTGCAG	Chromosome	2	32	1770431	1770461	5.2e-10	Chromosome	32	63	1103308	1103277	6.8e-09
266232_1	CATTGCTGTGTGTAGTCTTTGCCCATCTCCCAGGGCTGATTTATTACTACACACAGCAGTGTAG	Chromosome	2	32	1770431	1770461	5.2e-10	Chromosome	32	61	1103308	1103279	1.9e-09
266234_1	CATTGCTGTGTGTAGTCTTTGCCCATCTCCCAGGGCTGATTTATTACTACACACATCAGTGCAG	Chromosome	2	32	1770431	1770461	5.2e-10	Chromosome	32	63	1103308	1103277	6.8e-09
266235_1	CATTGCTGTGTGTAGTCTTTGCCCATCTCCCAGGGCTGATTTATTACTACACACGGCAGTGCAG	Chromosome	2	32	1770431	1770461	5.2e-10	Chromosome	32	63	1103308	1103277	6.8e-09
266242_1	CATTGCTGTGTGTCGTCTTTGCCCATCTCCCAGGGCTGATTTATTACTACACACAGCAGTACAG	Chromosome	2	32	1770431	1770461	2.4e-08	Chromosome	32	60	1103308	1103280	6.8e-09
268273_1	CATTTCGGGAGTACTGATTCTTTCAGTATTGATACCCACTTGTTGTCATACAGACCTGTTTTAACGCCTGCTCCGTA	Chromosome	2	31	478590	478561	2.5e-09	Chromosome	34	77	3986575	3986618	4.1e-17
268426_1	CATTTCTGCGGAAACCATCGAGTATCACTACGGCAAGCAGAGCGTTTAAAGACTGGTGTTACCAGCTGGCGC	Chromosome	1	39	1735431	1735469	2.2e-14	Chromosome	40	72	1195838	1195870	1e-07
269093_1	CATTTGCTCTCTAAAAATCTGGATCAAGCATTTGCTATCTAAAAATCTGGATCAAGC	Chromosome	2	29	4168518	4168545	9.5e-07	Chromosome	30	57	3943581	3943608	4.4e-05
269185_1	CATTTGGGCCTCATAATAGTTGGGCCGATTGTGGCACCACCGTGCCAACAGGGAGTGTTATAACGGTTTATTAGTCTGGAGACGA	Chromosome	2	38	4439519	4439555	1.7e-11	Chromosome	40	84	3664883	3664927	1.3e-17
270129_1	CATTTTAGCCGCCCCAGTCAGTGTTGCAATTGGTCTGCGATTCAGACCATGGTG	Chromosome	2	22	4049967	4049987	0.00015	Chromosome	24	53	2942782	2942811	1.4e-09
271163_1	CATTTTTAGCATGGTTTTTTATTGGCGGCTATGCTGCCCCGTTGTGATTAGCGTGGTGGTGATTATTATCCCACCGTGCGGAG	Chromosome	2	41	1878823	1878862	7.5e-15	Chromosome	44	81	3950355	3950392	9.7e-14
271983_1	CATTTTTTTATAACGATATTTGTCGTTAAGACGATCACGGTTTGGGATCCATTTTGCCGTCCTGGCGTGG	Chromosome	1	30	2269926	2269955	2.2e-09	Chromosome	29	69	245875	245835	7.7e-09
272585_1	CCAACTTTTAGCGCACGGCTCTCTCACATCACGCCAACCCCTAGCGGACGGCTCTCCG	Chromosome	1	25	1923180	1923156	9.8e-07	Chromosome	25	48	1365614	1365591	0.0076
272983_1	CCAATCTGCCGGGAGGATGTATGGCATCAGGCCAATCTGCCGGGAGGATGTATGG	Chromosome	2	24	4472552	4472530	0.00054	Chromosome	27	44	1291000	1291017	0.007
273333_1	CCACCTTTATCAGCAGTGTAAAAGTCAACACGCGATGATGGACGAGATGAAAAAAAAG	Chromosome	1	28	4250440	4250467	9.8e-07	Chromosome	32	52	2747198	2747178	0.0076
273542_1	CCACTGCCTTTGGTAGAGGAAAGTGCTAAATAATAATCAAACGCCACTGCCTTTGGTAGAGGAAAGTGCTAAATAATAATCAATTGTG	Chromosome	44	72	1299470	1299498	1.1e-08	Chromosome	69	87	1300694	1300712	0.0038
273544_1	CCACTGCCTTTGGTAGAGGAAAGTGCTAAATAATAATCAATACGCCACTGCCTTTGGTAGAGGAAAGTGCTAAATAATAATCAATTGAG	Chromosome	45	73	1299470	1299498	1.1e-08	Chromosome	70	87	1300694	1300711	0.014
274798_1	CCATCACGATAAGCAGTAAGCCGGTCATAAGCAGTAAGCCGGTCATAA	Chromosome	10	30	228881	228901	0.00012	Chromosome	28	48	3946825	3946845	0.00012
274917_1	CCATCACGCAACGACTCACCTAGGCGACGATCCCAACGGCTCACCTAGGCGACGATCCCTAG	Chromosome	10	34	4166920	4166944	5e-05	Chromosome	35	62	4208408	4208435	2.3e-08
274921_1	CCATCACGCAACGGCTCACCTAGGCGACGATCCCAACGGCTCACCTAGGCGACGATCCCTAC	Chromosome	10	34	4035792	4035816	1.1e-06	Chromosome	35	61	4166920	4166946	8.4e-08
277777_1	CCCCAGAGGTATTGATAGGTGAAGTCAACTTCGGGTTGAGCACACGCTGAAAAACATAACCCATAACATGCG	Chromosome	2	44	2976385	2976343	1.3e-16	Chromosome	45	71	2167113	2167139	4.8e-06
278386_1	CCCCTGTCTGTCCATAGTGATCGCTCAAAAACATAACCCATAAATTCAA	Chromosome	2	21	2942847	2942866	0.00044	Chromosome	21	44	2167112	2167135	0.00012
278390_1	CCCCTGTCTGTGCATAGTGAAAATCACGCCCCTGTCTGTCCATAGTGAC	Chromosome	9	26	4427768	4427785	0.0057	Chromosome	30	48	2942847	2942865	0.0016
279668_1	CCCTTAAAGAAGCGTACTTTGCAGTGCTCACACAGCCCTTCAAGAAGCGTACTTTGCAGTGCTCACACAG	Chromosome	2	35	225313	225346	1.3e-11	Chromosome	37	70	2729615	2729582	6e-10
279667_1	CCCTTAAAGAAGCGTACTTTGCAGTGCTCACACAGCCCTTAAAGAAGCGTACTTTGCAGTGCACACACAG	Chromosome	2	35	2729615	2729582	1.3e-11	Chromosome	37	70	3427220	3427187	6e-10
280969_1	CCGCACTGGCTGGACTATCCACATCACGCCACACGACCGCTTTGGTGGCCAT	Chromosome	2	25	468187	468210	2.9e-06	Chromosome	30	49	4246154	4246135	0.00049
281994_1	CCGCTGCCTTTGGTAGAGGAAAGTGCTAAATAATAATCAATCACGCCGCTGCCTTTGGTAGAGGAAAGTGCTAAATAATAATCAATTGTG	Chromosome	49	74	1299473	1299498	5.1e-07	Chromosome	71	89	1300694	1300712	0.004
282062_1	CCGCTGTACCAGGAACCACCTCCTTAGCCTGTGTAATCTCCCTTACACGGGCTTGTTCAATGGGGAGATGGTTCGCTGGGAG	Chromosome	3	57	2167142	2167196	1.6e-21	Chromosome	55	81	3952513	3952539	1.2e-07
282121_1	CCGCTTCGGCGGGGTTTTTAACTCTACTGCCCCGCCGAAAAGAC	Chromosome	1	19	3982822	3982840	0.0013	Chromosome	18	38	2240415	2240395	0.0001
282123_1	CCGCTTCGGCGGGGTTTTTTAACTCTACTGCCCCGCCGAAACACGCCGCTTCGGCGGGGTTTTTTAACTCTACTTCCCCGCCGAAAAAAC	Chromosome	1	20	3982822	3982841	0.0011	Chromosome	19	39	2240415	2240395	0.00031
282125_1	CCGCTTCGGCGGGGTTTTTTAACTCTACTGCCCCGCCGAAATCACGCCGCTTCGGCGGGGTTTTTTAACTCTACTGCACCGCCGAAAAAAC	Chromosome	1	20	3982822	3982841	0.0011	Chromosome	19	39	2240415	2240395	0.00031
282124_1	CCGCTTCGGCGGGGTTTTTTAACTCTACTGCCCCGCCGAAAGCCGCTTCGGCGGGGTTTTTTAACTCTACTGCCCCGCCGAAAAAAC	Chromosome	1	20	3982822	3982841	0.0011	Chromosome	19	39	2240415	2240395	0.00029
282127_1	CCGCTTCGGCGGGGTTTTTTAACTCTACTGCCCCGCCGAACACGCCGCTTCGGCGGGGTTTTTTAACTCTACTGCCCCGCCGAAAAAAC	Chromosome	1	20	3982822	3982841	0.0011	Chromosome	19	39	2240415	2240395	0.0003
282126_1	CCGCTTCGGCGGGGTTTTTTAACTCTACTGCCCCGCCGAAATCATGCCGCTTCGGCGGGGTTTTTTAACTCTACTGCCCCGCCGAAAAAAC	Chromosome	1	20	3982822	3982841	0.0011	Chromosome	19	39	2240415	2240395	0.00031
283617_1	CCGTTCACGCGTTGGGAGTGAGGCTGCAAGCACGCCGTTCACGCGTTGGGAGTGAGGCTGC	Chromosome	2	26	2729553	2729529	4.9e-05	Chromosome	28	60	4168255	4168287	3.8e-06
285392_1	CCTATCAGCAGTGTAAAAGGATCACGCCAATCAGCAGTATAAAAGGG	Chromosome	3	20	4250447	4250464	0.0053	Chromosome	18	37	1039351	1039332	0.00041
285654_1	CCTATCAGCAGTGTAAAAGGCAGTATCACGCCAATCAGCAGTGTAAAAAGCAG	Chromosome	3	22	4250447	4250466	0.00051	Chromosome	21	41	1039352	1039332	0.0066
287443_1	CCTCAGCAGTTGACAGTGGCATTTCATCCAGTTTGCCACTGGCCTCAGCAGTTGACAGTGGCATTTCATCCAGTTTGCCACTGTCCAGCTG	Chromosome	45	64	3845797	3845778	0.0011	Chromosome	65	91	1368567	1368541	1.4e-07
288006_1	CCTCCTTGTTTCGACTTAAGCTGGCAATTATGTCGAAACAAACGCCTCCTTGTTTCGACTTAAGCTGGCAATTATGTCGAAACAAGGAGCA	Chromosome	46	73	3658031	3658004	4e-08	Chromosome	74	91	4085844	4085827	0.014
289130_1	CCTGATATGATTTAACGTTAATTAAGCCTGATATGATTTAACGTA	Chromosome	1	18	15423	15440	0.0049	Chromosome	21	44	2514303	2514326	0.00011
289135_1	CCTGATATGATTTAACGTTAATTATGCCTGATATGATTTAACGTA	Chromosome	1	18	608043	608060	0.0049	Chromosome	21	44	15417	15440	0.00011
289137_1	CCTGATATGATTTAACGTTCATTACGCCTGATATGATTTAACGTA	Chromosome	1	18	608043	608060	0.0049	Chromosome	21	44	2514303	2514326	2.3e-06
290662_1	CCTTAAAGAAGCGTACTTTGCAGTGCTCACACACATCACGCCTTAAAGAAGCGTACTTTGCAGTGCTCACACAG	Chromosome	1	36	225313	225348	5e-11	Chromosome	41	74	3427220	3427187	1.4e-11
292334_1	CCTTCCTGACTGCTGATGCTTTCGGCCATCACGCCTTCCTGACCGCTGATGCTTTCGGC	Chromosome	2	26	3533891	3533915	1e-06	Chromosome	23	45	2658323	2658345	0.0006
293021_1	CCTTGCGCGGGATTCCCGCGATTGCAGTAGCGGTTCTGCTTCTATCAGCAGTGTAAAAGGC	Chromosome	2	41	2270011	2270050	4.8e-15	Chromosome	43	61	4250447	4250465	0.0023
293940_1	CCTTTCAGACCTTTTACTTCACCACGCCTTTCAGACCTTTTACCTCACGTAATCGGATCTGGAT	Chromosome	2	22	4049926	4049946	0.00019	Chromosome	25	42	255077	255094	0.0088
294884_1	CGAAAAACATAACCCATAAAATGCTAGCTGTAAAAAAAAAACAAAAAAAAGACGAGCGGTG	Chromosome	2	32	2167117	2167147	4.9e-10	Chromosome	35	53	4479980	4479962	0.0023
296599_1	CGACGCTCTCCGATCTGCTATCACGATTAAGCAGTAAGCCGGTCATAAAGCAGTAAGCCGGTCATAAA	Chromosome	26	49	228879	228902	4.5e-06	Chromosome	48	68	3946826	3946846	0.00021
296830_1	CGACTTCAAAGAAGCGCGCAATGTCAGTGCGCTGTTCCTCGGAAAGGGCAGGGGCGAGTGTAAATGCGTACACCCGCCCTGCTGCCCAGTG	Chromosome	2	69	3525663	3525583	1.1e-18	Chromosome	70	90	2533807	2533827	0.00031
296831_1	CGACTTCAATGAAACGCGCAATGTCAGTGCGCTGTTCCTCGGAAAGGGCAGGGGCGAGTGTAAATGCGTACACCCGCCCTGCTGCCCAGTG	Chromosome	2	69	3525663	3525583	1.1e-18	Chromosome	70	90	2533807	2533827	0.00031
296836_1	CGACTTCAATGAAGCGCGCAATGTCAGTGCGCTGTTCCTCGAAAGGGCAGGGGCGAGTGTAAATGCTTACACCCGCCCTGCTGCCCAGTG	Chromosome	2	66	3525663	3525585	3.9e-18	Chromosome	69	89	2533807	2533827	0.00031
296822_1	CGACTGTTATTCGGCGCTCCACGGAGCGCCTTTTTTGAGTGTATGTCACTGGTTCGAGTCCAGTCAGACGAGCCAG	Chromosome	2	36	4242566	4242532	4e-12	Chromosome	41	75	2059892	2059926	1.9e-10
296839_1	CGACTTCAATGAAGCGCGCAATGTCAGTGCGCTGTTCCTCGGAAAGGGCAGGGGCGAGTGTAAATGCGAACACCCGCCCTGCTGCCCAGTG	Chromosome	2	68	3525663	3525584	8.4e-20	Chromosome	70	90	2533807	2533827	0.00031
296833_1	CGACTTCAATGAAGCGCGCAATGTCAGTGCGCTGTGAAAGGGCAGGGGCGAGTGTAAATGCGTACACCCGCCCTGCTGCCCAGTG	Chromosome	2	63	3525663	3525583	1e-13	Chromosome	64	84	2533807	2533827	0.00028
296837_1	CGACTTCAATGAAGCGCGCAATGTCAGTGCGCTGTTCCTCGAGGGCAGGGGCGAGTGTAAATGCGTACACCCGCCCTGCTGCCCAGTG	Chromosome	2	66	3525663	3525583	4.9e-17	Chromosome	67	87	2533807	2533827	0.0003
296843_1	CGACTTCAATGAAGCGCGCAATGTCAGTGCGCTGTTCCTCGGAAAGGGCAGGGGCGAGTGTAAATGCGTACACCCGCCCTGCTGCCAAGTG	Chromosome	2	69	3525663	3525583	2.3e-20	Chromosome	70	90	2533807	2533827	0.014
296844_1	CGACTTCAATGAAGCGCGCAATGTCAGTGCGCTGTTCCTCGGAAAGGGCAGGGGCGAGTGTAAATGCGTACACCCGCCCTGCTGCCCAGCG	Chromosome	2	69	3525663	3525583	2.3e-20	Chromosome	70	89	2533807	2533826	0.0011
296847_1	CGACTTCAATGAAGCGCGCAATGTCAGTGCGCTGTTCCTCGGAAAGGGCAGGGGCGAGTGTAAATTCGTACACCCGCCCTGCTGCCCAGTG	Chromosome	2	69	3525663	3525583	1.1e-18	Chromosome	70	90	2533807	2533827	0.00031
296851_1	CGACTTCAATGAAGCGCGCAATGTCAGTGCGCTGTTCCTCGGAAAGGGCAGGGTCGAGTGTAAATGCGTACACCCGCCCTGCTGCCCAGTG	Chromosome	2	69	3525663	3525583	1.1e-18	Chromosome	70	90	2533807	2533827	0.00031
296849_1	CGACTTCAATGAAGCGCGCAATGTCAGTGCGCTGTTCCTCGGAAAGGGCAGGGGCGAGTGTGAATGCGTACACCCGCCCTGCTGCCCAGTG	Chromosome	2	69	3525663	3525583	1.1e-18	Chromosome	70	90	2533807	2533827	0.00031
296850_1	CGACTTCAATGAAGCGCGCAATGTCAGTGCGCTGTTCCTCGGAAAGGGCAGGGGTGAGTGTAAATGCGTACACCCGCCCTGCTGCCCAGTG	Chromosome	2	69	3525663	3525583	1.1e-18	Chromosome	70	90	2533807	2533827	0.00031
296853_1	CGACTTCAATGAAGCGCGCAATGTCAGTGCGCTGTTCCTCGGAAAGGGCAGTGGCGAGTGTAAATGCGTACACCCGCCCTGCTGCCCAGTG	Chromosome	2	69	3525663	3525583	1.1e-18	Chromosome	70	90	2533807	2533827	0.00031
296854_1	CGACTTCAATGAAGCGCGCAATGTCAGTGCGCTGTTCCTGAAAGGGCAGGGGCGAGTGTAAATGCGTACACCCGCCCTGCTGCCCAGCG	Chromosome	2	67	3525663	3525583	3.8e-18	Chromosome	68	87	2533807	2533826	0.0011
296855_1	CGACTTCAATGAAGCGCGCAATGTCAGTGCGCTGTTCCTGAAAGGGCAGGGGCGAGTGTAAATGCGTACACCCGCCCTGCTGCCCAGTG	Chromosome	2	67	3525663	3525583	3.8e-18	Chromosome	68	88	2533807	2533827	0.0003
296856_1	CGACTTCAATGAAGCGTGCAATGTCAGTGCGCTGTTCCTCGGAAAGGGCAGGGGCGAGTGTAAATGCGTACACCCGCCCTGCTGCCCAGTG	Chromosome	2	69	3525663	3525583	1.1e-18	Chromosome	70	90	2533807	2533827	0.00031
296857_1	CGACTTCAATGAAGTGCGCAATGTCAGTGCGCTGTTCCTCGGAAAGGGCAGGGGCGAGTGTAAATGCGTACACCCGCCCTGCTGCCCAGTG	Chromosome	2	69	3525663	3525583	1.1e-18	Chromosome	70	90	2533807	2533827	0.00031
296858_1	CGACTTCAATGGAGCGCGCAATGTCAGTGCGCTGTTCCTCGGAAAGGGCAGGGGCGAGTGTAAATGCGTACACCCGCCCTGCTGCCCAGTG	Chromosome	2	69	3525663	3525583	1.1e-18	Chromosome	70	90	2533807	2533827	0.00031
296897_1	CGAGAAGAGCTGGCACGCTCGTGAATATCCTGTGCGGAGATGCAGGCAAGAGAGCTGGAGTTC	Chromosome	2	36	1023121	1023155	3.1e-12	Chromosome	39	62	3191772	3191749	4e-06
297152_1	CGAGCCTGCGAAGGTGTGCTGTGAGGCATGCTGGAGGTATGCGAGCCTGCGAAGGTGTGCTGTGAGGCATGCTGGAGGTATCAGAAGTGG	Chromosome	3	40	3425579	3425542	1.1e-13	Chromosome	44	89	4169845	4169890	3.9e-18
297568_1	CGAGTTGTTAAAGCTACGATCAATATTATGTTTTTACACACGCAAAGGGGAGTAACTTCATAGGG	Chromosome	1	37	1741200	1741236	1.2e-11	Chromosome	42	61	3238374	3238393	0.0007
297634_1	CGATAAGGGTGAGGTCGGTGGTTCAAGTCCACTCAGGCCTAACGCGATAAGGGTGAGGTCGGTGGTTCAAATCCACCCAGGCCTACCG	Chromosome	2	41	225415	225454	8.1e-15	Chromosome	46	87	3427118	3427077	1.4e-12
297635_1	CGATAAGGGTGAGGTCGGTGGTTCAAGTCCACTCAGGCCTAACGCGATAAGGGTGAGGTCGGTGGTTCAAGTCAAATCAGGCCTACCG	Chromosome	2	41	225415	225454	8.1e-15	Chromosome	46	87	4037175	4037216	1.4e-12
297636_1	CGATAAGGGTGAGGTCGGTGGTTCAAGTCCACTCAGGCCTAACGCGATAAGGGTGAGGTCGGTGGTTCAAGTCCAATCAGGCCTACCG	Chromosome	2	41	225415	225454	8.1e-15	Chromosome	46	87	4037175	4037216	2.9e-14
297637_1	CGATAAGGGTGAGGTCGGTGGTTCAAGTCCACTCAGGCCTAACGCGATAAGGGTGAGGTCGGTTGTTCAAGTCCACTCAGGCCTACCG	Chromosome	2	41	225415	225454	8.1e-15	Chromosome	46	87	3427118	3427077	2.9e-14
297639_1	CGATAAGGGTGAGGTCGGTGGTTCAAGTCCACTCAGGCCTAACGCGATAAGGGTGAGGTCGTTGGTTCAAGTCCACTCAGGCCCACCG	Chromosome	2	41	4037175	4037214	8.1e-15	Chromosome	46	87	225415	225456	1.4e-12
297658_1	CGATAAGGGTGAGGTCGGTGGTTCAAGTCCACTCAGGCCTACACGCGATAAGGGTGAGGGCGGTGGTTCAAGTCCACTCAGGCCTACCG	Chromosome	2	42	4037175	4037215	2.3e-15	Chromosome	47	88	3427118	3427077	3e-14
297660_1	CGATAAGGGTGAGGTCGGTGGTTCAAGTCCACTCAGGCCTACACGCGATAAGGGTGAGGTCGGTGGTTCAAGTCCACTCAGGACTACCG	Chromosome	2	42	4037175	4037215	2.3e-15	Chromosome	47	88	3427118	3427077	3e-14
297661_1	CGATAAGGGTGAGGTCGGTGGTTCAAGTCCACTCAGGCCTACACGCGATATGGGTGAGGTCGGTGGTTCAAGTCCACTCAGGCCTACCG	Chromosome	2	42	4037175	4037215	2.3e-15	Chromosome	47	88	3427118	3427077	3e-14
297662_1	CGATAAGGGTGAGGTCGGTGGTTCAAGTCCACTCAGGCCTACGCGATAAGGGTGAGGTCGTTGGTTCAAGTCCACTCAGGCCTACCG	Chromosome	2	42	4037175	4037215	2.2e-15	Chromosome	45	86	3427118	3427077	2.9e-14
297663_1	CGATAAGGGTGAGGTCGGTGGTTCAAGTCCACTCAGGCCTATCACGCGATAAGGGTGAGGTCAGTGGTTCAAGTCCACTCAGGCCTACCT	Chromosome	2	44	4037175	4037217	8.4e-15	Chromosome	48	89	3427118	3427077	3e-14
297665_1	CGATAAGGGTGAGGTCGGTGGTTCAAGTCCACTCAGGCCTATCACGCGATAAGGGTGAGGTCGGTGGTTCAAGTCCACTCAGGCCTACCAG	Chromosome	2	44	4037175	4037217	8.5e-15	Chromosome	48	90	225415	225457	1.8e-16
297942_1	CGATCACGCAGTGAAATTGAACTCGCTGTGCAATTGGTCTGCGATTCAGACAATGGAACAG	Chromosome	6	30	2727180	2727156	4.9e-05	Chromosome	29	56	2942783	2942810	1.1e-06
299230_1	CGATTACGGCCTCAGGCGACAGGCATAAGATATTTCTTACTGATATTTTTTTCCGGGATTGTTATTTCCACGA	Chromosome	2	28	105264	105290	4.9e-06	Chromosome	26	73	4112760	4112807	2.3e-14
299522_1	CGATTCGTTATCAGTGCACAATCACGCGATTCGTTATCAGTGCAG	Chromosome	5	22	1855177	1855160	0.0049	Chromosome	27	45	1622915	1622897	0.0014
300450_1	CGATTGTCTGATGAAAATGAGCAGTAAAACCTCTGCGATTGTCTGATGAAAATGAGCAGTAAAACCTCTG	Chromosome	2	34	225346	225378	4.6e-11	Chromosome	37	69	4037106	4037138	4.6e-11
302262_1	CGCGAAGGTGGCGGAATTGGTAGACGCGCTACCTTCACGCGCGAAGGTGGCGGAATTGGTAGACGCGCTAGCTTCG	Chromosome	2	37	3982606	3982641	5.2e-11	Chromosome	41	75	4606286	4606252	4e-12
303174_1	CGCTACATGGAGATTAACTCAATCTAGGCGTTGTTAATGACAAAATGGAGAAATCCAGTATTGTTGCTAACGAACGC	Chromosome	1	27	1757382	1757408	1.1e-07	Chromosome	28	76	3448537	3448489	1.5e-11
303793_1	CGCTGAAAAACATAAACCATAAAATGCTAGCTGTGTATCACGCGCTGAAAAACATAAACCATAAAATGCTAGCTGTG	Chromosome	26	46	1596342	1596362	0.012	Chromosome	43	76	2167113	2167146	6.8e-10
303934_1	CGCTGAAAAACATAACCATAAAATGCTAGCTGTTTATGACGCGCTGAAAAACATAACCATAAAATGCTAGCTGTG	Chromosome	1	33	2167113	2167146	1.1e-07	Chromosome	32	52	4286768	4286748	0.011
304169_1	CGCTGAAAAACATAACCCATAAAATAAAAAACCAAAAAATAGA	Chromosome	1	25	2167113	2167137	5.8e-07	Chromosome	23	41	3050868	3050886	0.0013
304464_1	CGCTGAAAAACATAACCCATAAAATGATTATCACGCGCTGAAAAACATCACCCATAAAATGCC	Chromosome	1	26	2167113	2167138	3.1e-07	Chromosome	23	40	2655416	2655399	0.0086
304992_1	CGCTGAAAAACATAACCCATAAAATGCCAAGCAGGCACTGAAAAATGTAACCAATAAAATAGA	Chromosome	1	27	2167113	2167139	8.6e-08	Chromosome	31	48	3898797	3898780	0.0086
305092_1	CGCTGAAAAACATAACCCATAAAATGCCACGGTTGTGATGTTGTGTTGTTGTGTTTGCAATTGGTCTGCGAG	Chromosome	1	27	2167113	2167139	1e-07	Chromosome	29	71	2942756	2942798	1.3e-16
306361_1	CGCTGAAAAACATAACCCATAAAATGCTAGCTGTACCAGGACGTTAAGCAGTAAGCCGGTCATAAAG	Chromosome	1	41	2167113	2167153	1.5e-15	Chromosome	44	66	228880	228902	1.6e-05
306428_1	CGCTGAAAAACATAACCCATAAAATGCTAGCTGTACCAGGGCACTGTTACTACAAAACGCCAAAGGCGGAGAGTTATTAGGTGCCGCC	Chromosome	1	40	2167113	2167152	8.1e-15	Chromosome	45	87	411544	411502	1.7e-16
306451_1	CGCTGAAAAACATAACCCATAAAATGCTAGCTGTACCAGTATAACGAGCTGAAAAAAATAACAAATCAAATGATAACTGAAACAGAAA	Chromosome	1	39	2167113	2167151	2.9e-14	Chromosome	40	57	1182244	1182227	0.014
307422_1	CGCTGAAAAACATAACCCATAAAATGGATTCTGATTCCGGCATTCCGAGGTTCAAATCCTCGTCCCCCAGCCAG	Chromosome	1	26	2167113	2167138	3.9e-07	Chromosome	26	73	696477	696430	5e-16
308101_1	CGCTGAAAAACATAACCTATAAAATGCAAAAACAAAACTAAAAAAAGCG	Chromosome	1	27	2167113	2167139	2.7e-06	Chromosome	28	45	1227115	1227098	0.0057
313024_1	CGGAACGGCATTCCAGGGGCAGACACCCTGGTAGTCCACGCCGTGAACGGCGTTCCAGGGGCAGACACCCTGGTAGTCCACGCCG	Chromosome	21	49	3427973	3427945	2.2e-05	Chromosome	46	64	4442338	4442356	0.0037
313029_1	CGGAACGGCGTTCCAGGGGCAGATACCCTGGTAGGCCACGCCGTGAACGGCGTTCCAGGGGCAGATACCCTGGTAGTCCACGCCG	Chromosome	46	64	4442338	4442356	0.0037	Chromosome	63	85	4208936	4208958	2.2e-05
313027_1	CGGAACGGCGTTCCAGGGGCAGACACCCTGGTAGTCCACGCCGTAAACGGCGTTCCAGGGGCAGACACCCTGGTAGTCCACGCC	Chromosome	4	22	4442338	4442356	0.0036	Chromosome	21	49	3942597	3942625	4.6e-07
313034_1	CGGAACGGCGTTCCAGGGGCAGATACCCTGGTAGTCCCCGCCGTAAACGGCGTTCCAGGGGCAGATACCCTGGTAGTCCCCGCCG	Chromosome	4	22	4442338	4442356	0.0037	Chromosome	21	49	3942597	3942625	4.7e-07
313031_1	CGGAACGGCGTTCCAGGGGCAGATACCCTGGTAGTCCACGCCATGAACGGCGTTCCAGGGGCAGATACCCTGGTAGTCCACGCC	Chromosome	4	22	4442338	4442356	0.0036	Chromosome	21	49	4208936	4208964	2.2e-05
313032_1	CGGAACGGCGTTCCAGGGGCAGATACCCTGGTAGTCCACGCCATGAACGGCGTTCCAGGGGCAGATACCCTGGTAGTCCACGCCA	Chromosome	4	22	4442338	4442356	0.0037	Chromosome	21	49	2730368	2730340	2.2e-05
313030_1	CGGAACGGCGTTCCAGGGGCAGATACCCTGGTAGTCCACGCCATAAACGGCGTTCCAGGGGCAGATACCCTGGTAGTCCACGCCA	Chromosome	4	22	4442338	4442356	0.0037	Chromosome	21	49	3942597	3942625	4.7e-07
313033_1	CGGAACGGCGTTCCAGGGGCAGATACCCTGGTAGTCCACGCCGTAAACGGCGTTCCAGGGGCAGATACCCTGGTAGTCCACGCC	Chromosome	4	22	4442338	4442356	0.0036	Chromosome	21	49	224560	224588	1e-08
313297_1	CGGAGAGGGCGACCGGCGTTGATTTGCTTTCGCTGCGGTCGCCCAGAGAGGGCGGCCGGCGTTGATTTGCTTTCGCTGCGGTCGCC	Chromosome	2	27	3709921	3709896	4.8e-07	Chromosome	28	47	3536944	3536925	0.001
314236_1	CGGCTTACGGTTGTGATGTTGTGTTGTAGTGTTTGCAATTGGTCAAGAGCCTGCAAACACACAACACAATACACAAAG	Chromosome	2	44	2942751	2942793	6.9e-15	Chromosome	45	76	2427856	2427825	1.9e-10
314509_1	CGGGGCAATAGCTCAGCTGGGAGAGCGCCTGCTTTGCACGCCGCGGGGCAATAGCTCAGCTGGGAGAGCGCCTGCTTTGCACGCAGGAGGC	Chromosome	2	41	4037260	4037299	4e-13	Chromosome	45	90	225500	225545	1.8e-16
314544_1	CGGGGCTACAGCTCAGCTGGGAGAGCGCCTGCTTTACACGCGCGGGGCTACAGCTCAGCTGGGAGAGCGCCTGCTTTACACGCT	Chromosome	2	41	4037260	4037299	1.7e-11	Chromosome	44	83	3427033	3426994	1.7e-11
314545_1	CGGGGCTACAGCTCAGCTGGGAGAGCGCCTGCTTTGCACGCACGCGGGGCTACAGATCAGCTGGGAGAGCGCCTGCTTTGCACGCT	Chromosome	2	42	4037260	4037300	1e-13	Chromosome	46	85	3427033	3426994	1.7e-11
314560_1	CGGGGCTACAGCTCAGCTGGGCGAGCGCCTGCTTTGCACGCGCGGGGCTACAGCTCAGCTGGGAGAGCGCCTGCTTTGCACGCG	Chromosome	2	41	225500	225539	1.7e-11	Chromosome	44	83	3427033	3426994	3.6e-13
314553_1	CGGGGCTACAGCTCAGCTGGGAGAGCGCCTGCTTTGCACGCGCGAGGCTACAGCTCAGCTGGGAGAGCGCCTGCTTTGCACGCT	Chromosome	2	41	3427033	3426994	3.6e-13	Chromosome	46	83	4037262	4037299	4.6e-12
314550_1	CGGGGCTACAGCTCAGCTGGGAGAGCGCCTGCTTTGCACGCCGCGGGGCTATAGCTCAGCTGGGAGAGCGCCTGCTTTGCACGCAGGAGGC	Chromosome	2	41	3427033	3426994	4e-13	Chromosome	45	90	4037260	4037305	3.9e-18
314554_1	CGGGGCTACAGCTCAGCTGGGAGAGCGCCTGCTTTGCACGCGGGGCTACAGCTCAGCTGGGAGAGCGCCTGCTTTGCACGCT	Chromosome	2	41	3427033	3426994	3.4e-13	Chromosome	42	81	4037260	4037299	3.4e-13
314569_1	CGGGGCTATAGCTAAGCTGGGACAGCGCCTGCTTTGCACGCCGCGGGGCTATAGCTCAGCTGGGAGAGCGCCTGCTTTGCACGCAGGAGGC	Chromosome	2	41	225500	225539	1.8e-11	Chromosome	45	90	4037260	4037305	3.9e-18
314557_1	CGGGGCTACAGCTCAGCTGGGAGAGCGCCTGCTTTGCACGGCGGGGCTACAGCTCAGCTGGGAGAGCGCCTGCTTTGCACGCG	Chromosome	2	40	4037260	4037298	1.3e-12	Chromosome	43	82	3427033	3426994	3.5e-13
314585_1	CGGGGCTATAGCTCAGCTGGGAGAGCGCCTGCTTTGCACGCGCGGGGCTATAGCTCAGATGGGAGAGCGCCTGCTTTGCACGCAGGAGGA	Chromosome	2	41	3427033	3426994	8.4e-15	Chromosome	44	89	4037260	4037305	1.8e-16
314584_1	CGGGGCTATAGCTCAGCTGGGAGAGCGCCTGCTTTGCACGCCGCGGGGCTATAGCTCAGCTGGGAGAGCGCCTGCTTTGCACGCAGGAGGT	Chromosome	2	41	3427033	3426994	8.5e-15	Chromosome	45	91	225500	225546	1.1e-18
314586_1	CGGGGCTATAGCTCAGCTGGGAGAGCGCCTGCTTTGCACGGCGGGGCTATAGCTCAGCTGGGAGAGCGCCTGCTTTGCACGCAGGAGGC	Chromosome	2	40	225500	225538	3e-14	Chromosome	43	88	4037260	4037305	3.8e-18
314597_1	CGGGGCTATAGCTCAGCTGTGAGAGCGCCTGCTTTGCACGCGCGGGGCTATAGCTCAGCTGGGAGAGCGCCTGCTTTGCACGCAGGAGGC	Chromosome	2	41	4037260	4037299	3.9e-13	Chromosome	44	89	225500	225545	3.9e-18
315126_1	CGGTGAGGCGTCCGAGTGGCTGAAGGAGCACGCCTGGATAGGAGTAGCTGAAGGAGCACGCCTGGAT	Chromosome	2	38	925971	925935	1.2e-11	Chromosome	42	66	1097640	1097616	5.6e-05
315817_1	CGTAACGCTGCTGGCGACCATAATGGCGGACGTTGGCGCTTTTGAATCCGATAAAA	Chromosome	2	27	3477401	3477376	1.2e-05	Chromosome	28	54	4439667	4439693	3.3e-06
316301_1	CGTAGGGCACAGAGGTAAGATGTTCTATCTTTCAGACCTTTAACACGGATCTTCATTTCATTGCAAATATTCCGG	Chromosome	1	44	4049898	4049941	8.5e-14	Chromosome	49	75	981525	981551	5.1e-06
316571_1	CGTAGGGTACAGAGGTAAGATGTTCTATCTCTCAGACCAAAGAAAACAACTAAGATTCCCCAAGTAGCGGCGAGCGAACGGGGAGCC	Chromosome	1	38	4049898	4049935	4.8e-12	Chromosome	39	86	3426567	3426520	1.3e-12
317367_1	CGTCCATTGACCTGGGTACTGCGAATACCCGTGAAGTCAACCTCGGGTTGAGCACATGAATTTCACCAGCCTGCACACAA	Chromosome	2	30	3401049	3401021	9.3e-09	Chromosome	31	74	2976368	2976325	9.3e-14
317332_1	CGTCATGCAGGGGGTCGCGGGTTCGAGTCCCGTCCGTTCCGCGCGTCATGCAGGGGGTCGCGGGTTCGAGTCCCGTCCGTTCCGCCACCCC	Chromosome	2	42	228962	229002	1.1e-13	Chromosome	45	90	3946906	3946951	1.8e-16
317472_1	CGTCCCCTTCGTCTAGCGGCCCAGGACACCGCCCTTTCACGTACATGAAATGCTGGATGGCTTCCGCACCGCACTGATCGATCATCTGGC	Chromosome	1	41	4209773	4209813	1.1e-13	Chromosome	40	89	848729	848680	2.3e-20
317576_1	CGTCGCAACTGCTCTTTAACACGCGTCGCAACTGCTCTTTAACAG	Chromosome	1	21	3428915	3428895	0.00011	Chromosome	22	44	4207992	4208014	8.2e-06
322375_1	CTAAGCAGTAAGCCGGTCATAAAACCGGTGGCGCTAAGCAGTAAGCCGGTCATAAAACCGGTGGTTGGCC	Chromosome	2	31	3946825	3946854	2.2e-09	Chromosome	35	67	228881	228913	4.6e-11
322677_1	CTAATCACAGATTTACCCTGTCTGTCCATAGTCGTTTTTACGGATATGACAGGGTGAGC	Chromosome	11	32	2942842	2942863	4.7e-05	Chromosome	33	58	2946063	2946038	2.8e-07
322754_1	CTAATCACGGATTTACCCTGTCTGTCCATAGTCGTTTTTACGGATATGAGAGTGTAAGG	Chromosome	11	32	2942842	2942863	4.7e-05	Chromosome	33	59	2946063	2946037	0.0078
322753_1	CTAATCACGGATTTACCCTGTCTGTCCATAGTCGTTTTTACGGATATGACAGGATAAGC	Chromosome	11	32	2942842	2942863	4.7e-05	Chromosome	33	53	2946063	2946043	0.00017
322847_1	CTAATCCGTATGTCACTGGTTCGAGTCCAGTCAGAGGAGCCGCTAATCCGTATGTCACTGGTTCGAGTCCAGTCAGAGGAGCCG	Chromosome	2	41	2044584	2044623	7.6e-15	Chromosome	44	83	2058067	2058028	7.6e-15
323247_1	CTACAGTGGATCTGGCTGCAGGTTGAACGGCTGAAAAACATAACCCATAAAATGC	Chromosome	13	33	1708380	1708360	0.00015	Chromosome	30	55	2167114	2167139	2.5e-07
323342_1	CTACCAGAGAATGTTATCACGGGAGACAAACCGGCTCCCCGAAAGCTATTTAGGTAGCGCCTCGTGAACTCATCTCCGGGGGTG	Chromosome	2	31	4169559	4169588	6e-06	Chromosome	35	83	226570	226618	7.6e-20
323461_1	CTACCATCACGGACGGACGCGGGGTGGAGCAGCCTGGTAGCTCGACGGGCGCGGGGTGGAGCAGCCTGG	Chromosome	13	50	2947382	2947419	3.5e-12	Chromosome	48	69	3318291	3318270	5.9e-05
323575_1	CTACCGGAGAATGTTATCACGGGAGACAAACCGGCCCGAAAGCTATTTAGGTAGCGCCTCGTGAACTCATCTCCGGGGGTG	Chromosome	2	31	3944622	3944651	1.2e-07	Chromosome	35	80	226573	226618	3.4e-18
323579_1	CTACCGGAGAATGTTATCACGGGAGACAAACCGGCTCCCCGAAAGCTATTTAGGTAGCGCCTCATGAACTCATCTCCAGGGGTG	Chromosome	2	31	3944622	3944651	1.3e-07	Chromosome	35	83	226570	226618	1.6e-16
323573_1	CTACCGGAGAATGTTATCACGGGAGACAAACCCTCCCCGAAAGCTATTTAGGTAGCGCCTCGTGAACTCATCTCCGGGGGTG	Chromosome	2	31	4169559	4169588	1.2e-07	Chromosome	33	81	226570	226618	7.3e-20
323587_1	CTACCGGAGAATGTTATCACGGGAGACAAACTGGCTCCCCGAAAGCTATTTAGGTAGCGCCTCGTGAACTCATCTCCGGGGGTG	Chromosome	2	31	4038437	4038466	1.3e-07	Chromosome	35	83	226570	226618	7.6e-20
323588_1	CTACCGGAGAATGTTATCACGGGAGACCCCGAAAGCTATTTAGGTAGCGCCTCGTGAACTCATCTCCGGGGGTG	Chromosome	2	27	3425865	3425840	3.9e-07	Chromosome	27	73	226572	226618	8.3e-19
324547_1	CTATCAAGATAAGCAGTAAGCCGGTCATAAGCAGTAAGCCGGTCATAA	Chromosome	3	30	3946818	3946845	3.3e-05	Chromosome	28	48	228881	228901	0.00012
324733_1	CTATCACGATAAGCAGTAAGCCGGTCATAAGCAGTAAGCCGGTCCTAA	Chromosome	10	30	3946825	3946845	0.00012	Chromosome	28	48	228881	228901	0.0055
324744_1	CTATCACGATGAGCAGTAAGCCGGTCATAAGCAGTAAGCCGGTCATAA	Chromosome	12	30	228883	228901	0.0015	Chromosome	28	48	3946825	3946845	0.00012
326477_1	CTATCGCGATAAGCAGTAAGCCGGTCATAAGCAGTAAGCCGGTCATAA	Chromosome	10	30	3946825	3946845	0.00012	Chromosome	28	48	228881	228901	0.00012
328632_1	CTCAGGCAATGGGTTTCTGTTTTGAAGCCGGGCGCGGCTACGCGCCAGACATTTCGGCGTGG	Chromosome	2	32	4159095	4159125	5e-10	Chromosome	32	62	2454132	2454101	1.1e-06
328681_1	CTCAGGTACCCCATAACCTTACACGGCTTTATCAGCAGTGTAAAAGGCC	Chromosome	3	23	3683497	3683477	0.00012	Chromosome	27	48	4250444	4250465	3.4e-05
329833_1	CTCCGTCGAGCTGGTAAAGGAATATGTTCGCCACCCGTGCGATTACGGGAAAAGCGCGCAAAGTGCGGCAAAACTGATAA	Chromosome	2	30	2176006	2175978	9.3e-09	Chromosome	31	80	1936425	1936474	2e-20
330049_1	CTCCTCTGTAGTTCAGTCGGTAGAACGGCGGACTGTTAATCCGGACTGTTCCGACGTATATCAATGGTTCTAAGCCAGTCAAAGGAGCCAC	Chromosome	2	43	2059851	2059892	6.6e-16	Chromosome	42	90	2058075	2058027	0.004
332039_1	CTCTCATCACGATATTTGTGTTGATCATATTTGTGTTGATCCTATTT	Chromosome	12	29	1335588	1335571	0.0053	Chromosome	28	47	2560305	2560286	0.00041
332385_1	CTCTCGGAAGCGCTGGCGAAACTTACTGCCGGGCTTCCGTCACGTACAGGTTGGCAATG	Chromosome	2	23	980248	980269	4.7e-05	Chromosome	23	58	3220100	3220135	3.6e-06
332384_1	CTCTCGGAAGCGCTGGCGAAACTTACTGCCGGGCTTCCGTCAAGAGCCGATTAGCAATG	Chromosome	2	23	980248	980269	4.7e-05	Chromosome	23	58	3220100	3220135	3.6e-06
332383_1	CTCTCGGAAGCGCTGGCGAAACTTACTGCCGGGCTTCCGCCATGTGCCGTTTGGCAATG	Chromosome	2	23	980248	980269	4.7e-05	Chromosome	23	58	3220100	3220135	3.6e-11
332386_1	CTCTCGGAAGCGCTGGCGAAACTTACTGCCGGGCTTCCGTCATACGTCGTTAGGCAAAG	Chromosome	2	23	980248	980269	4.7e-05	Chromosome	23	57	3220100	3220134	1.3e-05
332382_1	CTCTCGGAAGCGCTGGCGAAAATTACTGCCGGGCTTCCGTCATGTGCCGTTTGGCAATG	Chromosome	2	21	980248	980267	0.0006	Chromosome	23	58	3220100	3220135	7.7e-13
332388_1	CTCTCGGAAGCGCTGGCGAAACTTACTGCCGGGCTTCCGTCATGAGCCGTTTTTCAATG	Chromosome	2	23	980248	980269	4.7e-05	Chromosome	23	58	3220100	3220135	7.7e-08
332390_1	CTCTCGGAAGCGCTGGCGAAACTTACTGCCGGGCTTCCGTCATGTGCCGTTTGGCAAGG	Chromosome	2	23	980248	980269	4.7e-05	Chromosome	23	57	3220100	3220134	2.8e-12
332387_1	CTCTCGGAAGCGCTGGCGAAACTTACTGCCGGGCTTCCGTCATATGCCGTTTGGCAATG	Chromosome	2	23	980248	980269	4.7e-05	Chromosome	23	58	3220100	3220135	3.6e-11
332389_1	CTCTCGGAAGCGCTGGCGAAACTTACTGCCGGGCTTCCGTCATGTGCCGTTTGGCAAAG	Chromosome	2	23	980248	980269	4.7e-05	Chromosome	23	57	3220100	3220134	2.8e-12
332391_1	CTCTCGGAAGCGCTGGCGAAACTTACTGCCGGGCTTCCGTCATGTGCCGTTTGGCAATT	Chromosome	2	23	980248	980269	4.7e-05	Chromosome	23	58	3220100	3220135	7.7e-13
332394_1	CTCTCGGAAGCGCTGGCGAAACTTACTGCCGGGCTTCCTTCATGTGCCGTTTGGCAATG	Chromosome	2	23	980248	980269	4.7e-05	Chromosome	23	58	3220100	3220135	3.6e-11
332393_1	CTCTCGGAAGCGCTGGCGAAACTTACTGCCGGGCTTCCGTCATGTGCCGTTTTGCAATG	Chromosome	2	23	980248	980269	4.7e-05	Chromosome	23	58	3220100	3220135	3.6e-11
332392_1	CTCTCGGAAGCGCTGGCGAAACTTACTGCCGGGCTTCCGTCATGTGCCGTTTGGCGATG	Chromosome	2	23	980248	980269	4.7e-05	Chromosome	23	58	3220100	3220135	3.6e-11
332395_1	CTCTCGGAAGCGCTGGCGAAGCTTACTGCCGGGCTTCCGTCATGTGCCGTTTGGCAATG	Chromosome	2	23	980248	980269	0.0022	Chromosome	23	58	3220100	3220135	7.7e-13
336202_1	CTGCGGGCACTCGAAGATACGGATTCTTCCTCCTTACCTTAAAGAAGCGTTCTTTGCAGTGCTCACACAG	Chromosome	2	28	2731272	2731246	4.7e-06	Chromosome	29	70	4209681	4209722	4.6e-16
337048_1	CTGGCGGATTGAGAGAAGATTTTCAGCCTGATACAGAGATCATTGAGAGAAGATTTTCAGCCTGATACAG	Chromosome	2	37	4040442	4040477	9.9e-13	Chromosome	42	70	228687	228715	7.7e-09
337147_1	CTGGGGCACTCGAAGATACGGATTCTTACCTTAAAGAAGCGTTCTTTGCAGTGCTCACACAG	Chromosome	4	28	223659	223683	1.1e-06	Chromosome	25	62	4209685	4209722	6.4e-14
337151_1	CTGGGGGCACTCGAAGATACGGATTCTTAACGTCGCCTTAAAGAAGCGTACTTTGCAGTGCTCACACAG	Chromosome	2	36	2731272	2731238	1.6e-10	Chromosome	36	69	2729615	2729582	1.3e-11
337208_1	CTGGGGTACCGCCAAGCGGTAAGGCACCGGTTTTTGATACCCAGCAATGAAGGTATCGAAGAGGCAGCGG	Chromosome	2	41	696939	696900	2.8e-13	Chromosome	42	70	2818042	2818014	3.6e-07
337835_1	CTGTCACGATAAGCAGTAAGCCGGTCATAAGCAGTAAGCCGGTCATAA	Chromosome	10	30	228881	228901	0.00012	Chromosome	28	48	3946825	3946845	0.00012
337934_1	CTGTCGGCACTCGAAGATACGGATTCTTAACGTCCTTAAAGAAGCGTACTTTGCAGTGCTCACACAG	Chromosome	2	34	4166544	4166576	2e-09	Chromosome	34	67	225313	225346	1.2e-11
338174_1	CTGTGGCCCGTGCAGGCTGGTGTGCTGACTACAACGAACCTGGTTATTCCATCGTCTTTTCAACCTAACTTCTAAGGTTCAGCATGACAC	Chromosome	2	40	1302489	1302527	3e-14	Chromosome	41	89	2909709	2909661	3.9e-18
338203_1	CTGTGGGCAATCGAAGATACGGATTCTTCCTCCTTACCTTAACGAAGCGTTCTTTGCAGTGCTCACACAG	Chromosome	2	28	3941693	3941719	4.7e-06	Chromosome	29	70	3943342	3943383	2.1e-14
338216_1	CTGTGGGCACTCGAAGATACGAAACCCTTAAAGAAGCGTACTTTGTAGTGCTAACACAG	Chromosome	2	21	2731272	2731253	0.0006	Chromosome	26	59	4168201	4168234	4.6e-10
338217_1	CTGTGGGCACTCGAAGATACGAAACCCTTAAAGAAGCGTACTTTGTAGTGCTCAAACAC	Chromosome	2	21	4035416	4035435	0.0006	Chromosome	26	58	4168201	4168233	1.7e-09
338218_1	CTGTGGGCACTCGAAGATACGAAACCCTTAAAGAAGCGTACTTTGTAGTGCTCACACAA	Chromosome	2	21	4166544	4166563	0.0006	Chromosome	26	58	4168201	4168233	3.6e-11
338204_1	CTGTGGGCACACGAAGATACGGATTCTTACCTTAAAGAAGCGTTCTTTGCAGTGCTCACACAG	Chromosome	2	29	2731272	2731245	1.1e-06	Chromosome	26	63	4209685	4209722	6.6e-14
338207_1	CTGTGGGCACCCGAAGATACGGATTCTTACCTTAAAGAAGCGTTCTTTGCAGTGCTCACACAG	Chromosome	2	29	223656	223683	1.1e-06	Chromosome	26	63	3943346	3943383	6.6e-14
338222_1	CTGTGGGCACTCGAAGATACGAAACCCTTAAAGAAGCTTACTTTGTAGTGCTCACACAG	Chromosome	2	21	2731272	2731253	0.0006	Chromosome	26	59	4168201	4168234	4.6e-10
338223_1	CTGTGGGCACTCGAAGATACGAAACCCTTAAAGAGGCGTACTTTGTAGTGCTCACACAC	Chromosome	2	21	4166544	4166563	0.0006	Chromosome	26	58	4168201	4168233	1.7e-09
338224_1	CTGTGGGCACTCGAAGATACGAAACCCTTAAAGGAGCGTACTTTGTAGTGCTCACACAG	Chromosome	2	21	223656	223675	0.0006	Chromosome	26	59	4168201	4168234	4.6e-10
338219_1	CTGTGGGCACTCGAAGATACGAAACCCTTAAAGAAGCGTACTTTGTAGTGCTCACACGG	Chromosome	2	21	3941693	3941712	0.0006	Chromosome	26	57	4168201	4168232	1.3e-10
338220_1	CTGTGGGCACTCGAAGATACGAAACCCTTAAAGAAGCGTACTTTGTAGTGCTCACCCAG	Chromosome	2	21	223656	223675	0.0006	Chromosome	26	59	4168201	4168234	4.6e-10
338206_1	CTGTGGGCACCCGAAGATACGGATTCTTAACGTCGCCTTAAAGAAGCGTACTTTGCAGTGCTCACACAG	Chromosome	2	36	2731272	2731238	1.6e-10	Chromosome	36	69	225313	225346	1.3e-11
338202_1	CTGTGGGCAATCGAAGATACGGATTCTTCCTCCTTACCTTAAAGAAGCGTTCTTTGCAGTGCTCACACAG	Chromosome	2	28	4208032	4208058	4.7e-06	Chromosome	29	70	3943342	3943383	4.6e-16
338221_1	CTGTGGGCACTCGAAGATACGAAACCCTTAAAGAAGCGTACTTTGTAGTGCTTACACAG	Chromosome	2	21	223656	223675	0.0006	Chromosome	26	59	4168201	4168234	4.6e-10
338230_1	CTGTGGGCACTCGAAGATACGGATAAACCTTAAAGAAGCGTTCTATGAAGTGTTCACACAG	Chromosome	2	24	2731272	2731250	1.4e-05	Chromosome	27	61	4037072	4037106	6.3e-09
338231_1	CTGTGGGCACTCGAAGATACGGATAAACCTTAAAGAAGCGTTCTTAAAAGGGCTCAAACAG	Chromosome	2	24	3941693	3941715	1.4e-05	Chromosome	27	61	4037072	4037106	1.4e-05
338232_1	CTGTGGGCACTCGAAGATACGGATAAACCTTAAAGAAGCGTTCTTTGAAGTGCTCACAAAG	Chromosome	2	24	3428877	3428855	1.4e-05	Chromosome	27	61	4037072	4037106	1.4e-10
338233_1	CTGTGGGCACTCGAAGATACGGATAAACCTTAAAGAAGCGTTCTTTGAAGTGCTCACACAA	Chromosome	2	24	4208032	4208054	1.4e-05	Chromosome	27	60	4037072	4037105	1e-11
338226_1	CTGTGGGCACTCGAAGATACGAATTCTTCCTCCTTACCTTAAAGAAGCGTTCTTTGCAGTGCTCACACAG	Chromosome	2	28	4208032	4208058	4.7e-06	Chromosome	29	70	4209681	4209722	4.6e-16
338239_1	CTGTGGGCACTCGAAGATACGGATTCCTTAAAGAAGAGTACTTTGCAGTGCTCACACAG	Chromosome	2	26	4208032	4208056	1e-06	Chromosome	26	59	2729615	2729582	4.6e-10
338227_1	CTGTGGGCACTCGAAGATACGGAATCTTCCTCCTTACCTTAAAGAAGCGTTCTTTGCAGTGCTCACACAG	Chromosome	2	28	3941693	3941719	4.7e-06	Chromosome	29	70	3943342	3943383	4.6e-16
338237_1	CTGTGGGCACTCGAAGATACGGATTCCCTAAAGAAGCGTACTTTGCAGTGCTCACACAG	Chromosome	2	26	4208032	4208056	1e-06	Chromosome	26	59	3427220	3427187	4.6e-10
338243_1	CTGTGGGCACTCGAAGATACGGATTCCTTAAAGAAGCGTACTTTGCAGTGCACACACAG	Chromosome	2	26	223656	223680	1e-06	Chromosome	26	59	3427220	3427187	4.6e-10
338244_1	CTGTGGGCACTCGAAGATACGGATTCCTTAAAGAAGCGTACTTTGCAGTGCTCAAACAG	Chromosome	2	26	3941693	3941717	1e-06	Chromosome	26	59	3427220	3427187	4.6e-10
338248_1	CTGTGGGCACTCGAAGATACGGATTCCTTAAAGAAGCGTACTTTGCAGTGTTCACACAG	Chromosome	2	26	4166544	4166568	1e-06	Chromosome	26	59	3427220	3427187	4.6e-10
338247_1	CTGTGGGCACTCGAAGATACGGATTCCTTAAAGAAGCGTACTTTGCAGTGCTCACGCAG	Chromosome	2	26	4208032	4208056	1e-06	Chromosome	26	59	2729615	2729582	4.6e-10
338249_1	CTGTGGGCACTCGAAGATACGGATTCCTTAAAGAAGCGTACTTTGCATTGCTCACACAG	Chromosome	2	26	3428877	3428853	1e-06	Chromosome	26	59	2729615	2729582	4.6e-10
338246_1	CTGTGGGCACTCGAAGATACGGATTCCTTAAAGAAGCGTACTTTGCAGTGCTCACACCG	Chromosome	2	26	4208032	4208056	1e-06	Chromosome	26	57	3427220	3427189	1.3e-10
338245_1	CTGTGGGCACTCGAAGATACGGATTCCTTAAAGAAGCGTACTTTGCAGTGCTCACACAT	Chromosome	2	26	4208032	4208056	1e-06	Chromosome	26	58	3427220	3427188	3.6e-11
338250_1	CTGTGGGCACTCGAAGATACGGATTCCTTAAAGGAGCGTACTTTGCAGTGCTCACACAG	Chromosome	2	26	3428877	3428853	1e-06	Chromosome	26	59	2729615	2729582	4.6e-10
338275_1	CTGTGGGCACTCGAAGATACGGATTCTTAACGACGCCTTAAAGAAGCGTACTTTGCAGTGCTCACACAG	Chromosome	2	36	4035416	4035450	1.6e-10	Chromosome	36	69	2729615	2729582	1.3e-11
338297_1	CTGTGGGCACTCGAAGATACGGATTCTTAACGTCCTTAAAGAAGCGTACTTTGCAGTGCGCACACAA	Chromosome	2	34	3428877	3428845	4.3e-11	Chromosome	34	66	3427220	3427188	2e-09
338295_1	CTGTGGGCACTCGAAGATACGGATTCTTAACGTCCTTAAAGAAGCGTAATTTGCAGTGCTCACACAG	Chromosome	2	34	223656	223688	4.3e-11	Chromosome	34	67	3427220	3427187	5.6e-10
338300_1	CTGTGGGCACTCGAAGATACGGATTCTTAACGTCCTTAAAGAAGCGTACTTTGCAGTGTTCACACAG	Chromosome	2	34	3941693	3941725	4.3e-11	Chromosome	34	67	2729615	2729582	5.6e-10
338298_1	CTGTGGGCACTCGAAGATACGGATTCTTAACGTCCTTAAAGAAGCGTACTTTGCAGTGCTCACACAA	Chromosome	2	34	3941693	3941725	4.3e-11	Chromosome	34	66	3427220	3427188	4.3e-11
338299_1	CTGTGGGCACTCGAAGATACGGATTCTTAACGTCCTTAAAGAAGCGTACTTTGCAGTGCTCACACAT	Chromosome	2	34	4166544	4166576	4.3e-11	Chromosome	34	66	3427220	3427188	4.3e-11
338301_1	CTGTGGGCACTCGAAGATACGGATTCTTAACGTCCTTAAAGAAGGGTACTTTGCAGTGCTCACACAG	Chromosome	2	34	3941693	3941725	4.3e-11	Chromosome	34	67	225313	225346	5.6e-10
338306_1	CTGTGGGCACTCGAAGATACGGATTCTTAACGTCGCCTTAAAGAAGAGTACTTTGCAGTGCTCACACAG	Chromosome	2	36	223656	223690	3.5e-12	Chromosome	36	69	2729615	2729582	5.9e-10
338304_1	CTGTGGGCACTCGAAGATACGGATTCTTAACGTCGCAAGACCTTAAAGAAGCGTACTTTGTAGTGCTCACACAG	Chromosome	2	41	3941693	3941732	6.4e-15	Chromosome	40	74	4168200	4168234	3.9e-12
338307_1	CTGTGGGCACTCGAAGATACGGATTCTTAACGTCGCCTTAAAGAAGCGTACTTTGCAGTGCACACACAG	Chromosome	2	36	3941693	3941727	3.5e-12	Chromosome	36	69	225313	225346	5.9e-10
338303_1	CTGTGGGCACTCGAAGATACGGATTCTTAACGTCGCAAGACCCTTAAAGAAGCGTACTTTGCAGTGCTCACACAG	Chromosome	2	41	4166544	4166583	6.5e-15	Chromosome	42	75	3427220	3427187	1.4e-11
338308_1	CTGTGGGCACTCGAAGATACGGATTCTTAACGTCGCCTTAAAGAAGCGTACTTTGCAGTGCTCACACAT	Chromosome	2	36	3941693	3941727	3.5e-12	Chromosome	36	68	225313	225345	4.5e-11
338309_1	CTGTGGGCACTCGAAGATACGGATTCTTAACGTCGCCTTAAAGAAGCGTACTTTGCAGTGCTCACACGG	Chromosome	2	36	2731272	2731238	3.5e-12	Chromosome	36	67	2729615	2729584	1.6e-10
338310_1	CTGTGGGCACTCGAAGATACGGATTCTTAACGTCGCCTTAAAGAAGCGTACTTTGCAGTGCTCACGCAG	Chromosome	2	36	4208032	4208066	3.5e-12	Chromosome	36	69	225313	225346	5.9e-10
338311_1	CTGTGGGCACTCGAAGATACGGATTCTTAACGTCGCCTTAAAGAAGCGTACTTTGCAGTGCTCCCACAG	Chromosome	2	36	4166544	4166578	3.5e-12	Chromosome	36	69	3427220	3427187	5.9e-10
338312_1	CTGTGGGCACTCGAAGATACGGATTCTTAACGTCGCCTTAAAGAAGCGTACTTTGCAGTGCTCGCACAG	Chromosome	2	36	3941693	3941727	3.5e-12	Chromosome	36	69	3427220	3427187	5.9e-10
338316_1	CTGTGGGCACTCGAAGATACGGATTCTTAACGTCGTAAGACCTTAAAGAAACGTACTTTGTAGTGCTCACACAG	Chromosome	2	41	3941693	3941732	3e-13	Chromosome	40	74	4168200	4168234	1.8e-10
338317_1	CTGTGGGCACTCGAAGATACGGATTCTTAACGTCGTAAGACCTTAAAGAAGCGAACTTTGTAGTGCTCACACAG	Chromosome	2	41	3428877	3428838	3e-13	Chromosome	40	74	4168200	4168234	1.8e-10
338314_1	CTGTGGGCACTCGAAGATACGGATTCTTAACGTCGTAACACCTTAAAGAAGCGTACTTTGTAGTGCTCACACAG	Chromosome	2	41	4166544	4166583	1.4e-11	Chromosome	40	74	4168200	4168234	3.9e-12
338319_1	CTGTGGGCACTCGAAGATACGGATTCTTAACGTCGTAAGACCTTAAAGAAGCGTACTTTATAGTGCTCACACAG	Chromosome	2	41	4166544	4166583	3e-13	Chromosome	40	74	4168200	4168234	1.8e-10
338323_1	CTGTGGGCACTCGAAGATACGGATTCTTAACGTCGTAAGACCTTAAAGAGGCGTACTTTGTAGTGCTCACACAG	Chromosome	2	41	4208032	4208071	3e-13	Chromosome	40	74	4168200	4168234	1.8e-10
338321_1	CTGTGGGCACTCGAAGATACGGATTCTTAACGTCGTAAGACCTTAAAGAAGCGTACTTTGTAGTGCCCACACAG	Chromosome	2	41	3941693	3941732	3e-13	Chromosome	40	74	4168200	4168234	1.8e-10
338322_1	CTGTGGGCACTCGAAGATACGGATTCTTAACGTCGTAAGACCTTAAAGAAGCGTACTTTGTAGTGCTCACACCG	Chromosome	2	41	3941693	3941732	3e-13	Chromosome	40	72	4168200	4168232	5e-11
338324_1	CTGTGGGCACTCGAAGATACGGATTCTTAACGTCGTAAGTCCTTAAAGAAGCGTACTTTGTAGTGCTCACACAG	Chromosome	2	39	3428877	3428840	3.9e-12	Chromosome	41	74	4168201	4168234	1.4e-11
338325_1	CTGTGGGCACTCGAAGATACGGATTCTTAACGTCGTAGGACCTTAAAGAAGCGTACTTTGTAGTGCTCACACAG	Chromosome	2	41	4166544	4166583	1.4e-11	Chromosome	40	74	4168200	4168234	3.9e-12
338326_1	CTGTGGGCACTCGAAGATACGGATTCTTAACGTCTTAAGACCTTAAAGAAGCGTACTTTGTAGTGCTCACACAG	Chromosome	2	41	223656	223695	1.4e-11	Chromosome	40	74	4168200	4168234	3.9e-12
338332_1	CTGTGGGCACTCGAAGATACGGATTCTTACCTCAAAGAAGCGTTCTTTGCAGTGCTCACACAG	Chromosome	2	29	223656	223683	2.4e-08	Chromosome	26	63	3943346	3943383	3.1e-12
338336_1	CTGTGGGCACTCGAAGATACGGATTCTTACCTTAAAGAAGCGTTCATTGCAGTGCTCACACAG	Chromosome	2	29	3428877	3428850	2.4e-08	Chromosome	26	63	4209685	4209722	3.1e-12
338337_1	CTGTGGGCACTCGAAGATACGGATTCTTACCTTAAAGAAGCGTTCTGTGCAGTGCTTACACAG	Chromosome	2	29	3941693	3941720	2.4e-08	Chromosome	26	63	3943346	3943383	1.4e-10
338339_1	CTGTGGGCACTCGAAGATACGGATTCTTACCTTAAAGAAGCGTTCTTTGCGGTGCTCACACAG	Chromosome	2	29	4035416	4035443	2.4e-08	Chromosome	26	63	4209685	4209722	3.1e-12
338340_1	CTGTGGGCACTCGAAGATACGGATTCTTACCTTAAAGAAGCGTTCTTTTCAGTGCTCACACAG	Chromosome	2	29	4208032	4208059	2.4e-08	Chromosome	26	63	4209685	4209722	3.1e-12
338338_1	CTGTGGGCACTCGAAGATACGGATTCTTACCTTAAAGAAGCGTTCTTTGCAGTGCTCACACGG	Chromosome	2	29	4208032	4208059	2.4e-08	Chromosome	26	61	3943346	3943381	8.5e-13
338341_1	CTGTGGGCACTCGAAGATACGGATTCTTACCTTAGAGAAGCGTTCTTTGCAGTGCTCACACAG	Chromosome	2	29	3941693	3941720	2.4e-08	Chromosome	26	63	3943346	3943383	3.1e-12
338342_1	CTGTGGGCACTCGAAGATACGGATTCTTCCTCCTTACCTTAAAGAAGAGTTCTTTGCAGTGCTCACACAG	Chromosome	2	28	3428877	3428851	1e-07	Chromosome	29	70	3943342	3943383	2.1e-14
338343_1	CTGTGGGCACTCGAAGATACGGATTCTTCCTCCTTACCTTAAAGAAGCATTCTTTGCAGTGCTCACACAG	Chromosome	2	28	3941693	3941719	1e-07	Chromosome	29	70	4209681	4209722	2.1e-14
338344_1	CTGTGGGCACTCGAAGATACGGATTCTTCCTCCTTACCTTAAAGAAGCGCTCTTTGCAGTGCTCACACAG	Chromosome	2	28	3428877	3428851	1e-07	Chromosome	29	70	3943342	3943383	2.1e-14
338345_1	CTGTGGGCACTCGAAGATACGGATTCTTCCTCCTTACCTTAAAGAAGCGGTCTTTGCAGTGCTCACACAG	Chromosome	2	28	223656	223682	1e-07	Chromosome	29	70	3943342	3943383	2.1e-14
338348_1	CTGTGGGCACTCGAAGATACGGATTCTTCCTCCTTACCTTAAAGAAGCGTTCTTTGCAGTACTCACACAG	Chromosome	2	28	3428877	3428851	1e-07	Chromosome	29	70	4209681	4209722	2.1e-14
338349_1	CTGTGGGCACTCGAAGATACGGATTCTTCCTCCTTACCTTAAAGAAGCGTTCTTTGCAGTGATCACACAG	Chromosome	2	28	3428877	3428851	1e-07	Chromosome	29	70	3943342	3943383	2.1e-14
338347_1	CTGTGGGCACTCGAAGATACGGATTCTTCCTCCTTACCTTAAAGAAGCGTTCTTTGCAGCGCTCACACAG	Chromosome	2	28	3941693	3941719	1e-07	Chromosome	29	70	3943342	3943383	2.1e-14
338350_1	CTGTGGGCACTCGAAGATACGGATTCTTCCTCCTTACCTTAAAGAAGCGTTCTTTGCAGTGATCGCACAG	Chromosome	2	28	2731272	2731246	1e-07	Chromosome	29	70	3943342	3943383	9.9e-13
338351_1	CTGTGGGCACTCGAAGATACGGATTCTTCCTCCTTACCTTAAAGAAGCGTTCTTTGCAGTGCTCAAACAG	Chromosome	2	28	2731272	2731246	1e-07	Chromosome	29	70	4209681	4209722	2.1e-14
338352_1	CTGTGGGCACTCGAAGATACGGATTCTTCCTCCTTACCTTAAAGAAGCGTTCTTTGCAGTGCTCACAAAG	Chromosome	2	28	223656	223682	1e-07	Chromosome	29	70	4209681	4209722	2.1e-14
338357_1	CTGTGGGCACTCGAAGATACGGATTCTTCCTCCTTACCTTTAAGAAGCGTTCTTTGCAGTGCTCACACAG	Chromosome	2	28	2731272	2731246	1e-07	Chromosome	29	70	4209681	4209722	2.1e-14
338353_1	CTGTGGGCACTCGAAGATACGGATTCTTCCTCCTTACCTTAAAGAAGCGTTCTTTGCAGTGCTCACACAC	Chromosome	2	28	3941693	3941719	1e-07	Chromosome	29	69	3943342	3943382	1.7e-15
338355_1	CTGTGGGCACTCGAAGATACGGATTCTTCCTCCTTACCTTAAAGAAGTGTTCTTTGCAGTGCTCACACAG	Chromosome	2	28	4208032	4208058	1e-07	Chromosome	29	70	4209681	4209722	2.1e-14
338354_1	CTGTGGGCACTCGAAGATACGGATTCTTCCTCCTTACCTTAAAGAAGCGTTCTTTGCAGTGCTTACACAG	Chromosome	2	28	4208032	4208058	1e-07	Chromosome	29	70	3943342	3943383	2.1e-14
338358_1	CTGTGGGCACTCGAAGATACGGATTCTTCCTCCTTGCCTTAAAGAAGCGTTCTTTGCAGTGCTCACACAG	Chromosome	2	28	223656	223682	1e-07	Chromosome	29	70	3943342	3943383	2.1e-14
338363_1	CTGTGGGCACTCGAAGATACGGATTCTTCTTTAAAGAAGCGTACTTTGCAGCGCTCACAC	Chromosome	2	28	3428877	3428851	8e-08	Chromosome	31	60	2729613	2729584	8e-08
338364_1	CTGTGGGCACTCGAAGATACGGATTCTTCTTTAAAGAAGCGTACTTTGCAGTGCTAAAAC	Chromosome	2	28	4208032	4208058	8e-08	Chromosome	31	55	3427218	3427194	1e-06
338365_1	CTGTGGGCACTCGAAGATACGGATTCTTCTTTAAAGAAGCGTACTTTGCGGTGCTCACAC	Chromosome	2	28	2731272	2731246	8e-08	Chromosome	31	60	2729613	2729584	8e-08
338366_1	CTGTGGGCACTCGAAGATACGGATTCTTCTTTAAAGAAGCGTATTTTGCAGTGCTCACAC	Chromosome	2	28	3941693	3941719	8e-08	Chromosome	31	60	2729613	2729584	8e-08
338367_1	CTGTGGGCACTCGAAGATACGGATTCTTCTTTAAGGAAGCGTACTTTGCAGTGCTCACAC	Chromosome	2	28	4166544	4166570	8e-08	Chromosome	31	60	3427218	3427189	8e-08
338370_1	CTGTGGGCACTCGAAGATACGGATTTCTTAAAGAAGCGTACTTTGCAGTGCTCACACAG	Chromosome	2	25	223656	223679	3.6e-06	Chromosome	27	59	3427219	3427187	3.6e-11
338373_1	CTGTGGGCACTCGAAGATACGTATTCTTCCTCCTTACCTTAAAGAAGCGTTCTTTGCAGTGCTCACACAG	Chromosome	2	28	3428877	3428851	4.7e-06	Chromosome	29	70	3943342	3943383	4.6e-16
338395_1	CTGTGGGCAGTCGAAGATACGGATTCTTACCTTAAAGAAGCGTTCTTTGCAGTGCTCACACAG	Chromosome	2	29	2731272	2731245	1.1e-06	Chromosome	26	63	4209685	4209722	6.6e-14
338396_1	CTGTGGGCAGTCGAAGATACGGATTCTTCCTCCTTACCTTAAAGAAGCGTTATTTGCAATGCAAACACAG	Chromosome	2	28	4166544	4166570	4.7e-06	Chromosome	29	70	4209681	4209722	2.2e-09
338397_1	CTGTGGGCATTCGAAGATACGGATTCTTAACGTCCTTAAAGAAGCGTACTTTGCAGTGCTCACACAG	Chromosome	2	34	4208032	4208064	2e-09	Chromosome	34	67	2729615	2729582	1.2e-11
338394_1	CTGTGGGCAGTCGAAGATACGGATTCTTAACGTCGCCTTAAAGAAGCGTACTTTGCAGTGCTCACACAG	Chromosome	2	36	3941693	3941727	1.6e-10	Chromosome	36	69	2729615	2729582	1.3e-11
338399_1	CTGTGGGCGCTCGAAGATACGGATTCTTAACGTCGTAAGACCTTAAAGAAGCGTACTTTGTAGTGCTCACACAG	Chromosome	2	41	223656	223695	1.4e-11	Chromosome	40	74	4168200	4168234	3.9e-12
338398_1	CTGTGGGCGCTCGAAGATACGGATTCTTAACGTCCTTAAAGAAGCGTACTTTGCAGTGCTCACACAG	Chromosome	2	34	223656	223688	2e-09	Chromosome	34	67	3427220	3427187	1.2e-11
338400_1	CTGTGGGCGCTCGAAGATACGGATTCTTAACGTCGTAAGACCTTAAAGAAGCGTACTTTGTAGTGCTCACACAT	Chromosome	2	41	4208032	4208071	1.4e-11	Chromosome	40	73	4168200	4168233	1.4e-11
338403_1	CTGTGGTCACTCGAAGATACGGATTCTTAACGTCCTTAAAGAAGCGTACTTTGCAGTGCTCACACAG	Chromosome	2	34	4035416	4035448	2e-09	Chromosome	34	67	225313	225346	1.2e-11
338414_1	CTGTGTGCACTCGAAGATACGGATTCCTTAAAGAAGCGTACTTTGCAGTGCTCACACAG	Chromosome	2	26	2731272	2731248	4.7e-05	Chromosome	26	59	225313	225346	9.9e-12
338415_1	CTGTGTGCACTCGAAGATACGGATTCTTAACGTCCTTAAAGAAGCGTACTTTGCAGTGCTCACACAG	Chromosome	2	34	4208032	4208064	2e-09	Chromosome	34	67	2729615	2729582	1.2e-11
338416_1	CTGTGTGCACTCGAAGATACGGATTCTTCCTCCTTACCTTAAAGAAGCGTTCTTTGCAGTGCTCACACAG	Chromosome	2	28	3428877	3428851	4.7e-06	Chromosome	29	70	4209681	4209722	4.6e-16
339071_1	CTGTTGTTGTGTTTGCAACTGGACCATCACGCTGTTGTTGTGTTTGCAACTGGAG	Chromosome	15	32	4515206	4515189	0.007	Chromosome	33	53	2942771	2942791	0.007
339729_1	CTTAAGCAGTAAGCCGGTCATAAAACCGGTGGTCGCTTAAGCAGTAAGCCGGTCATAAAACCGGGGGTG	Chromosome	2	33	228880	228911	1.6e-10	Chromosome	37	68	3946824	3946855	7.6e-09
339731_1	CTTAAGCAGTAAGCCGGTCATAAAACCGGTGGTTACGCTTAAGCAGTAAGCCGGTCATAAAACCGGTGGTTGC	Chromosome	2	34	3946824	3946856	4.9e-11	Chromosome	39	72	228880	228913	1.4e-11
340893_1	CTTACCTTAAAGAAGCGTTCTTTGCAGTGCTCACACAGAGAACCTTAAAGAAGCGTTCTTTGCAGTGGTCACACAG	Chromosome	1	39	3943346	3943384	2.4e-14	Chromosome	42	76	4209688	4209722	1.9e-10
341347_1	CTTAGGACTTATTTGAATCACATTAAGGTCATCTCTCGTTTATTTACTTGTTTTAGTAAATGATGTTGCTTGC	Chromosome	1	24	850416	850439	4.9e-06	Chromosome	25	73	3888598	3888646	2.9e-18
341892_1	CTTATCACGGATCCCGTCGGCTCCAGTTAGGGGAGCCGAAGGGAAACCGC	Chromosome	11	28	3890435	3890452	0.0059	Chromosome	28	49	4038133	4038154	3.6e-05
342114_1	CTTATCGCGTCTCAACGTGCGGGGGTTTTCTCTTAGCCCCCGTTCTGTTG	Chromosome	10	34	1269902	1269926	7.6e-07	Chromosome	33	50	1269337	1269354	0.0059
342361_1	CTTATGCGAAGGTCGTAGGTTCGACTCCTGCTAATGCGAAGGTCGTAGGTTCGACTCCTATTATCGGCAG	Chromosome	4	29	262908	262933	3.6e-07	Chromosome	32	69	297214	297251	7.7e-14
343043_1	CTTCAGCAGATGACAGTGGCATTTCATCCAGTTTGCCACCGGCTTCAGCAGTTGACAGTGGCATTTCATCCAGTTTGCCACCGTCCAGCTG	Chromosome	44	64	3845798	3845778	0.00031	Chromosome	65	91	1368567	1368541	6.7e-06
343055_1	CTTCAGCAGTTGACAGTGGCATTTCATCCAGTTTGCCACTGTCCATCTG	Chromosome	2	22	3845798	3845778	0.00012	Chromosome	23	49	1368567	1368541	2.7e-06
343049_1	CTTCAGCAGTTGACAGTGGCATTTCATCCAGTTTGCCACTGGCTTCAGCAGTTGACAGTGGCATTTCATCCAGTTTGCCACTGACCAGCTG	Chromosome	44	64	3845798	3845778	0.00031	Chromosome	65	91	1368567	1368541	6.7e-06
343056_1	CTTCAGCAGTTGACAGTGGCATTTCATCCAGTTTGCCACTTGCTTCAGCAGTTGACAGTGGCATTTCATCCAGTTTGCCACTTTCCAGCTG	Chromosome	44	64	3845798	3845778	0.00031	Chromosome	65	91	1368567	1368541	6.7e-06
343051_1	CTTCAGCAGTTGACAGTGGCATTTCATCCAGTTTGCCACTGGCTTCAGCAGTTGACAGTGGCATTTCATCCAGTTTGCCACTGTCCTGCTG	Chromosome	44	64	3845798	3845778	0.00031	Chromosome	65	91	1368567	1368541	6.7e-06
343053_1	CTTCAGCAGTTGACAGTGGCATTTCATCCAGTTTGCCACTGGCTTCAGCAGTTGACAGTGGCATTTCATCTAGTTTGCCACTGTCCAGCTG	Chromosome	44	64	3845798	3845778	0.00031	Chromosome	65	91	1368567	1368541	6.7e-06
343058_1	CTTCAGCAGTTGACAGTGGCATTTCATCCATTTTGCCACTGGCTTCAGCAGTTGACAGTGGCATTTCATCCATTTTGCCACTGTCCAGCTG	Chromosome	44	64	3845798	3845778	0.00031	Chromosome	65	91	1368567	1368541	6.7e-06
343059_1	CTTCAGCAGTTGACAGTGGCATTTCCTCCAGTTTGCCACGCTTCAGCAGTTGACAGTGGCATTTCATCCAGTTTGCCACTGTCCAGCTG	Chromosome	42	62	3845798	3845778	0.0003	Chromosome	63	89	1368567	1368541	1.4e-07
343060_1	CTTCAGCAGTTGACAGTGGCGTTTCATCCAGTTTGCCACTGGCTTCAGCAGTTGACAGTGGCGTTTCATCTAGTTTGCCACTGTCCAGCTG	Chromosome	44	62	3845798	3845780	0.004	Chromosome	65	91	1368567	1368541	6.7e-06
343400_1	CTTCCACCCTTATCAGCAGTGTAAAAAAATCACGCTTCCACCTTTATCAGCAGTGTAAAAGGG	Chromosome	20	38	1242170	1242152	0.0024	Chromosome	36	62	4250438	4250464	8.6e-08
347536_1	CTTGCCAGCGGTCCGGCCGGGCTTCAAATCCGGCCCCCGCATCACGCTTGCCAGCGGTCCGGCCGGGATTCAAATCCGGCCCCCGCAACA	Chromosome	48	68	3942932	3942952	0.00031	Chromosome	69	89	2947441	2947461	0.00031
348090_1	CTTGCTGTCTGCGGGTCTGATCAATGTGTGCAGCTTGAAGATGTGAAACCGCGACTGATGAAAAC	Chromosome	2	26	4013905	4013929	1.2e-06	Chromosome	27	64	1942272	1942235	1.5e-10
348129_1	CTTGCTGTGTGTAGTCTTTGCCCATCTCCCAGTGCAAAATGTATTGGCGAGTAAGAACCGCATTTGGTACTTTCCGGGCAG	Chromosome	2	31	1770432	1770461	2.6e-09	Chromosome	33	80	1300868	1300915	2.6e-19
348617_1	CTTGTCACAGACACCATCCCTGTCTTCCACCACATGACAACGAGGCTAAAATTACTG	Chromosome	1	36	4106335	4106370	7.3e-08	Chromosome	34	57	1356062	1356039	3.4e-06
348830_1	CTTGTGATGTTGTGTTGTTGTGTTTGCAATCTGAAAACTGACACCCTCGCAGTAATCGTTAAAGCTGCAGAAGATT	Chromosome	2	30	2942760	2942788	8.7e-09	Chromosome	30	73	4110800	4110757	4e-12
349595_1	CTTTACAGACGAGGACGAGCAAGGCTTACGGTATCACGCTTTACAGACGAGAACGAGCAAGACATACGG	Chromosome	1	30	1915736	1915707	2.1e-09	Chromosome	29	46	2702224	2702207	0.0099
350959_1	CTTTCAGACCTTTTACTTCACGTAATCGGATTTGGCAGATCGCCAGTAAATGCAGTTCATTAAAACAAGGAGCGGCG	Chromosome	1	39	4049926	4049964	1.1e-12	Chromosome	42	76	1178557	1178591	8.8e-09
351534_1	CTTTCCCAGAGCGGCCAGACCTGTGCGCTGCTCTCTAAAGCCAGGAATTTAAAACAGAGGTGGTAATGG	Chromosome	2	40	755983	756021	2.1e-14	Chromosome	45	68	446687	446664	4.6e-06
352563_1	CTTTCCTTGCCATAGACACCATCCCTGTCTTCCCCCACATAAAAATTATCCAGAAGATGTTGTAAATCAAGAA	Chromosome	2	40	4106331	4106369	2.3e-14	Chromosome	40	71	122869	122900	1.8e-10
355333_1	CTTTGCGTGCTAATGCTGATGGCATCACGCTTTGCGTGTTAATGCTGATGC	Chromosome	8	28	1589384	1589364	0.0062	Chromosome	30	50	2816351	2816331	0.00013
355377_1	CTTTGCGTGTCACCTTTGGTACCACATCACGCTTTGCGTGTCACCTTTGGTACCT	Chromosome	15	32	1423058	1423075	0.007	Chromosome	33	54	1304825	1304846	0.0019
356499_1	CTTTTATCACGGATCCCGTCGGCTCCAGTTAGGAGCCGAAGGGAAACCGCAG	Chromosome	13	30	3890435	3890452	0.0064	Chromosome	32	49	226377	226394	0.0064
356685_1	CTTTTATGGCAGTGCCGAAAGGACTACCGCCTTCGGCATTGCCGCGGG	Chromosome	1	24	2425573	2425550	2.6e-06	Chromosome	25	47	2424634	2424612	9.2e-06
356686_1	CTTTTATGGCAGTGCCGAAAGGACTTACCGCCTTCGGCATTGCAGCGGG	Chromosome	1	24	2425573	2425550	2.7e-06	Chromosome	25	48	2424635	2424612	0.00012
356687_1	CTTTTATGGCAGTGCCGAAAGGACTTACCGCCTTCGGCTTTTATGGCAGTGCCGAAAGGACTTACCGCCTTCGGCATTGCCGCAGG	Chromosome	37	61	2425574	2425550	1.7e-06	Chromosome	62	83	2424635	2424614	8e-05
357102_1	CTTTTCCTTCCCATAGACACCATCACGCTTTTCCTTGCCATAGACAG	Chromosome	13	30	98666	98649	0.0053	Chromosome	29	46	4106330	4106347	0.0053
357708_1	CTTTTCCTTGCCATAGACACCTCGCGCTGGAGAAATAGCTTGATAATGGTCTTGCTTGGTAACCCAC	Chromosome	2	21	4106330	4106349	0.00073	Chromosome	20	37	3820612	3820629	0.0095
358175_1	CTTTTCGGGTGGTTTGTCACTTGTTTTACCGGGGATATGCCAACAAACCACCCCAATAC	Chromosome	2	42	1647102	1647062	5.9e-14	Chromosome	41	58	1292959	1292942	0.0078
358174_1	CTTTTCGGGCGGTTTGTTACTTGTTTTACCGGGGATATGCCAACAAACCACCCCAATAC	Chromosome	2	42	1647102	1647062	5.9e-14	Chromosome	41	58	1292959	1292942	0.0078
358176_1	CTTTTCGGGTGGTTTGTTACTTATTTTACCGGGGATATGCCAACAAACCACCCCAATAC	Chromosome	2	42	1647102	1647062	5.9e-14	Chromosome	41	58	1292959	1292942	0.0078
358181_1	CTTTTCGGGTGGTTTGTTACTTGTTTTACCGGGGATATGCCAACAAACCACCCCAATAT	Chromosome	2	42	1647102	1647062	1.3e-15	Chromosome	41	59	1292959	1292941	0.0022
358188_1	CTTTTCGGGTGGTTTGTTACTTGTTTTTCCGGGGATATGCCAACAAACCACCCCAATAC	Chromosome	2	42	1647102	1647062	5.9e-14	Chromosome	41	58	1292959	1292942	0.0078
358187_1	CTTTTCGGGTGGTTTGTTACTTGTTTTATCGGGGATATGCCAACAAACCACCCCAATAC	Chromosome	2	42	1647102	1647062	5.9e-14	Chromosome	41	58	1292959	1292942	0.0078
358189_1	CTTTTCGGGTGTTTTGTTACTTGTTTTACCGGGGATATGCCAACAAACCACCCCAATAC	Chromosome	2	42	1647102	1647062	5.9e-14	Chromosome	41	58	1292959	1292942	0.0078
358538_1	CTTTTGCCATTGATTGGCTTCGTCAATCACGCTTTTACCATTGATGGGCTTCGTG	Chromosome	2	24	2395021	2394999	1.2e-05	Chromosome	28	49	3001176	3001197	0.0019
358774_1	CTTTTGGGGTGGTTTGTTACTTGTTTTACCGGGGATATGCCAACAAACCACCCCAATAC	Chromosome	2	42	1647102	1647062	5.9e-14	Chromosome	41	58	1292959	1292942	0.0078
358784_1	CTTTTGGTCATTATCTGCACAGTAAACGGTCGAATAAAATAATTGAGGTTCGCTATGTCGGACGACATGTCTATGG	Chromosome	1	30	1765190	1765161	2.4e-09	Chromosome	33	76	3085934	3085890	4e-12
358862_1	CTTTTGTCGGCATTATTACCGTGATCACGCTTTTGTCGGCATTATTACCGG	Chromosome	5	27	4412642	4412620	0.00048	Chromosome	28	51	1303612	1303635	0.00013
365053_1	GAAACGATGTCGACTTGGAGGTTGTGCCCTTGAGGCGTGGCCGTTAAGTCGACCGCCTGC	Chromosome	2	41	224584	224623	4.7e-15	Chromosome	42	59	2730290	2730273	0.008
365842_1	GAAAGAACCCCGGCGAGGGGAAGAACCAGAAAGCACGACATTGC	Chromosome	2	21	4210520	4210539	0.00036	Chromosome	22	44	3580994	3580972	0.00036
369068_1	GAAATCAGGCGATACGTCTTGTACCTCTATATTGAGACAGTCTACGGTAAAGCTGTTGGTCTGCATTATTTTCCCAAGGT	Chromosome	2	38	3991136	3991172	3.3e-13	Chromosome	43	79	986877	986841	1.5e-11
369246_1	GAAATCCGGCCCCCGCAACCAAGGAAATCCGGCCCCCGCAACCAC	Chromosome	2	22	2947444	2947464	0.00011	Chromosome	25	45	3318232	3318212	0.00011
369264_1	GAAATCCGGCCCCCGCAACCACGGAAATCCGGCCCCCGCAACAAC	Chromosome	2	22	3318232	3318212	0.00011	Chromosome	25	42	2947444	2947461	0.0049
369265_1	GAAATCCGGCCCCCGCAACCACGGAAATCCGGCCCCCGCAACCCC	Chromosome	2	22	3318232	3318212	0.00011	Chromosome	25	43	2947444	2947462	0.0014
369269_1	GAAATCCGGCCCCCGCAACCAGGAAAGCCGGCCCCCGCAACCAC	Chromosome	2	21	2947444	2947463	0.00036	Chromosome	24	44	3318232	3318212	0.0047
370320_1	GAAATTGCGCGTAAACCTTCGTCTGAAGTGGGCATGATCCATGCTCGCGGTACTTATTGACGGGGGCCCGCACAG	Chromosome	2	55	1822108	1822055	2.3e-19	Chromosome	56	74	4167577	4167595	0.0031
370321_1	GAAATTGCGGGTAAAACTTCGTCTGAAGTGAGCATGATCCATGCTCGCGGTACTTATTGACGGGGGCCCGCACAG	Chromosome	2	55	1822108	1822055	5e-21	Chromosome	56	74	2730239	2730221	0.0031
370322_1	GAAATTGCGGGTAAACCTTCGTCTGAAGTGACCATGATCCATGCTCGCGGTACTTATTGACGGGGGCCCGCACAG	Chromosome	2	55	1822108	1822055	5e-21	Chromosome	56	74	4167577	4167595	0.0031
370323_1	GAAATTGCGGGTAAACCTTCGTCTGAAGTGAGCATGATCCAGGCTCGTGGTACTTATTGACGGGGGCCCGCACAG	Chromosome	2	55	1822108	1822055	2.3e-19	Chromosome	56	74	224689	224707	0.0031
370324_1	GAAATTGCGGGTAAACCTTCGTCTGAAGTGAGCATGATCCATGATCGCGGTACTTATTGACGGGGGCCCGCACAG	Chromosome	2	55	1822108	1822055	5e-21	Chromosome	56	74	3427844	3427826	0.0031
370333_1	GAAATTGCGGGTAAACCTTCGTCTGAAGTGAGCATGATCCATGTTCGCGGTACTTATTGACGGGGGCCCGCACAG	Chromosome	2	55	1822108	1822055	5e-21	Chromosome	56	74	4209065	4209083	0.0031
370334_1	GAAATTGCGGTTAAACCTTCGTCTGAAGTGAGCATGATCCATGCTCGCGGTACTTATTGACGGGGGCCCGCACAG	Chromosome	2	55	1822108	1822055	5e-21	Chromosome	56	74	2730239	2730221	0.0031
370793_1	GAACAATGCTCCCAATCGGGGAGCTACGTACGGCATAATAATAAAAAAATGAAAGTCCTCTATGACGGGAAAAAAGTG	Chromosome	2	30	3453382	3453354	9e-09	Chromosome	30	69	507222	507261	1.5e-11
371355_1	GAACAGGAAGAAGCTTGCTTCTTTGCTAACGAGTGGCGGACACGGAACAGGAAGAAGCTTGCTTCTTTGCTAACGAGTGGCGGACGGGTGG	Chromosome	2	41	4166729	4166768	4e-13	Chromosome	46	90	4208217	4208261	6.6e-16
371356_1	GAACAGGAAGAAGCTTGCTTCTTTGCTGAACGGAACAGGAAGAAGCTTGCTTCTTTGCTGACGAGTGGCGGACGGGTGG	Chromosome	2	29	223841	223868	3.3e-08	Chromosome	34	78	4208217	4208261	1.2e-17
371357_1	GAACAGGAAGAAGCTTGCTTCTTTGCTGACAAGTGGCGGACACGGAACAGGAAGAAGCTTGCTTCTTTGCTGACAAGTGGCGGACGGGTGG	Chromosome	2	41	4166729	4166768	4e-13	Chromosome	46	90	223841	223885	6.6e-16
371360_1	GAACAGGAAGAAGCTTGCTTCTTTGCTGACGAGCGGCGGACACGGAACAGGAAGAAGCTTGCTTCTTTGCTGACGAGCGGCGGACGGGTGG	Chromosome	2	41	4166729	4166768	4e-13	Chromosome	46	90	4035601	4035645	6.6e-16
371361_1	GAACAGGAAGAAGCTTGCTTCTTTGCTGACGAGTGGAGGACACGGAACAGGAAGAAGCTTGCTTCTTTGCTGACGAGTGGAGGACGGGTGG	Chromosome	2	41	4208217	4208256	4e-13	Chromosome	46	90	223841	223885	6.6e-16
371366_1	GAACAGGAAGAAGCTTGCTTCTTTGCTGGCGAGTGGCGGACACGGAACAGGAAGAAGCTTGCTTCTTTGCTGGCGAGTGGCGGACGGGTGG	Chromosome	2	41	4208217	4208256	4e-13	Chromosome	46	90	223841	223885	6.6e-16
371362_1	GAACAGGAAGAAGCTTGCTTCTTTGCTGACGAGTGGCGGAACAGGAAGAAGCTTGCTTCTTTGCTGACGAGTGGAGGACGGGTGG	Chromosome	2	40	4035601	4035639	2.8e-14	Chromosome	40	84	4208217	4208261	6e-16
371358_1	GAACAGGAAGAAGCTTGCTTCTTTGCTGACGAACGGAACAGGAAGAAGCTTGCTTCTTTGCTGACGAGTGGCGGACGGGTGG	Chromosome	2	32	4166729	4166759	7.5e-10	Chromosome	30	81	4035593	4035645	3.4e-18
371363_1	GAACAGGAAGAAGCTTGCTTCTTTGCTGACGAGTGGCGGACACGGAACAGGAAGAAGCTTGCTTCTTTGCTGACGAGTGGCGGACAGGTGG	Chromosome	2	41	4035601	4035640	8.5e-15	Chromosome	46	90	4208217	4208261	6.6e-16
371364_1	GAACAGGAAGAAGCTTGCTTCTTTGCTGACGAGTGGCGGACACGGAACAGGAAGAAGCTTGCTTCTTTGCTGACGAGTGGCGGACTGGTGG	Chromosome	2	41	4035601	4035640	8.5e-15	Chromosome	46	90	223841	223885	6.6e-16
371367_1	GAACAGGAAGAGGCTTGCTTCTTTGCTGACGAGTGGCGGACACGGAACAGGAAGAGGCTTGCTTCTTTGCTGACGAGTGGCGGACGGGTGG	Chromosome	2	41	4166729	4166768	4e-13	Chromosome	46	90	223841	223885	6.6e-16
372554_1	GAACCCTTGAAGTCACTGCCCGTTTCGAGAGGGACAGTCAAAGTCCGGTAATGGCGTTCTAC	Chromosome	2	31	4158372	4158343	1.8e-09	Chromosome	36	60	4190399	4190375	5e-05
373186_1	GAACCTGTCCATTATATTTCAAATAAAAGGCATCACGGAACCTGTCCATTATATATCAAATAAAAGG	Chromosome	21	38	2679481	2679498	0.0095	Chromosome	39	66	4360692	4360665	2.6e-08
373264_1	GAACGAACTATATTTTTGTGACCGGCGGGGTATAAAAACACCAAGGTTATCG	Chromosome	2	31	2909661	2909632	1.4e-09	Chromosome	32	51	764196	764215	0.00049
373566_1	GAACGATCTATTCACCTGAAAGTGGTTGGTAAGGTAACGCCGAAAGGTGAAACTCAGCTGACTCCAGAA	Chromosome	2	22	17457	17477	0.00021	Chromosome	23	69	4183892	4183938	3.5e-17
373721_1	GAACGCCACATCAGTTTGCCCATCACGGAACGCCACATCAGTTTGCG	Chromosome	12	29	2029283	2029300	0.0053	Chromosome	29	47	3663935	3663917	0.0015
374103_1	GAACGGCGTTCCAGGGGCAGACACCCTGGTAGTCCACGCCGTAAACGG	Chromosome	2	20	4442338	4442356	0.0015	Chromosome	19	47	4036320	4036348	2e-07
375998_1	GAACTTGCGGGTAAACCTTCGTCTGAAGTGAGCATGATCCATGCTCGCGGTACTTATTGACGGGGGCCCGCACAG	Chromosome	2	55	1822108	1822055	5e-21	Chromosome	56	74	4036449	4036467	0.0031
376564_1	GAAGAAGTTAAGGCGGGGCAAAATAGCGTGATCACGGAATAAGTTAATGCGTGACAAAATAGCGT	Chromosome	2	23	2867741	2867720	5.4e-05	Chromosome	25	42	3456654	3456637	0.009
377011_1	GAAGAGTTGTTACTCATATGTGTGGGTTCCTGGTTTAAAGAAAAACATAACCCATAAAATGTTAGCTGTACCAGGAACCAAAAC	Chromosome	2	36	1423799	1423833	4.6e-12	Chromosome	40	80	2167117	2167157	9.9e-14
377008_1	GAAGAGTTGTTACTCATATGTGTGGGTTCCTAGTTTGGCTATAAAGAAAAACATAACCCATAAAATGTTAGCTGTACCAGGAACCAAAAC	Chromosome	2	46	1423799	1423843	1.4e-12	Chromosome	46	86	2167117	2167157	1.1e-13
377013_1	GAAGAGTTGTTACTCATATGTGTGGGTTCCTGGTTTGGAAAGAAAAACATAACCCATAAAATGTTAGCTGTACCAGGAACCAAAAC	Chromosome	2	38	1423799	1423835	3.7e-13	Chromosome	42	82	2167117	2167157	1e-13
377014_1	GAAGAGTTGTTACTCATATGTGTGGGTTCCTGGTTTGGCTAAAGAAAAACATAACCCATAAAATGTTAGCTGTACCAGGAACCAAAAC	Chromosome	2	40	1423799	1423837	2.9e-14	Chromosome	44	84	2167117	2167157	1.1e-13
377015_1	GAAGAGTTGTTACTCATATGTGTGGGTTCCTGGTTTGGCTATAAAGAAAAACATAACCCATAAAATGTTACCTGTACCAGGAACCAAAAC	Chromosome	2	46	1423799	1423843	3e-14	Chromosome	46	86	2167117	2167157	5e-12
377017_1	GAAGAGTTGTTACTCATATGTGTGGGTTCCTGGTTTGGCTCAGAAAAACATAACCCATAAATGTTAGCTGTACCAGGAACCAAAAC	Chromosome	2	41	1423799	1423838	7.9e-15	Chromosome	43	82	2167117	2167157	7.9e-10
377026_1	GAAGAGTTGTTACTCATATGTGTGGGTTCCTGGTTTGGCTCGAAAAACAGAACCCATAAAATGTTAGCTGTACCAGGAACCAAAAC	Chromosome	2	41	1423799	1423838	7.9e-15	Chromosome	42	82	2167117	2167157	4.7e-12
377027_1	GAAGAGTTGTTACTCATATGTGTGGGTTCCTGGTTTGGCTCTAAAGAAAAACATAACCCATAAAATGTTAGCTGTACCAGGAAACAAAAC	Chromosome	2	46	1423799	1423843	6.5e-16	Chromosome	46	86	2167117	2167157	5e-12
377029_1	GAAGAGTTGTTACTCATATGTGTGGGTTCCTGGTTTGGCTCTATAAAGAAAAACATAACCCATAAAATGCC	Chromosome	2	45	1423799	1423842	3.6e-17	Chromosome	48	70	2167117	2167139	1.7e-05
377028_1	GAAGAGTTGTTACTCATATGTGTGGGTTCCTGGTTTGGCTCTAACGAAAAACGTAACCCATAAAATGTTAGCTGTACCAGGAACCAAAAC	Chromosome	2	43	1423799	1423840	6.5e-16	Chromosome	46	86	2167117	2167157	5e-12
377030_1	GAAGAGTTGTTACTCATATGTGTGGGTTCCTGGTTTGGTAAAGAAAAACATAACCCATAAAATGTTAGCTGTACCAGGAACCAAAAC	Chromosome	2	38	1423799	1423835	3.7e-13	Chromosome	43	83	2167117	2167157	1e-13
377933_1	GAAGCAGTAAGCCGGTCATAAAACCGGTGATTGTGAGAGTCATAAAACCGGTGGTTGTC	Chromosome	2	34	3946826	3946858	1.7e-09	Chromosome	39	58	228895	228914	0.0006
378615_1	GAAGCGAAAATCGCCAAACTGGAAGCGGAACAGGCGAAGATTGAGCAAACATTGACGGTACTCACATTCCTGAAACCTTGAAGGTAAAAAA	Chromosome	1	36	409767	409732	1.4e-12	Chromosome	41	58	2287120	2287103	0.014
379672_1	GAAGGAGGGGGTCGGCGGTTCGATCCCGTCATCACCCAACGGAAGGAGGGGGTCGGCGGTTCGATCCCGTCATCACCCACCACTTC	Chromosome	2	38	780801	780837	3.7e-13	Chromosome	43	86	2521209	2521252	4.7e-17
379673_1	GAAGGAGGGGGTCGGCGGTTCGATCCCGTCATCACCCACCAACGGAAGGAGGGGGTCGGCGGTTCGATCCCGTCATCACCCACCACTCC	Chromosome	2	43	2520967	2521008	6.4e-16	Chromosome	46	88	781104	781146	1.8e-16
379689_1	GAAGGAGGGGGTCGGCGGTTCGATCCCGTCATCACCCACCGGAAGGAGGGGGTCGGCGGTTCGATCCCGTCATCACCCACCACTTC	Chromosome	2	40	780801	780839	2.8e-14	Chromosome	43	86	2521209	2521252	4.7e-17
381004_1	GAAGTCCCCCCCCTCGCACCACGGAAGTCCCCCCCCTCGCACCAAA	Chromosome	2	23	3982673	3982694	3.1e-05	Chromosome	25	46	4606219	4606198	3.1e-05
381095_1	GAAGTCGGGCATGTTGCCTGGTTGATGTGGTGATAAAAACATAACCCATAAAATCCC	Chromosome	2	35	4175876	4175909	9.4e-12	Chromosome	35	54	2167118	2167137	0.00057
381424_1	GAAGTTCCGACCTGCACGAATGGCGTAACGATGGCCAGGCTAGAATTTGGGTGGGTATCTTTTTATTAGCAGCACTGCTGGCGGCGCTGTG	Chromosome	2	41	3424832	3424793	4e-13	Chromosome	44	90	3338441	3338395	1.1e-18
381428_1	GAAGTTCCGACCTGCACGAATGGCGTAATGAAGAATTTGGGTGGGTATCTTTTTATTAGCAGCACTGCTGGCGGCGCTGTG	Chromosome	2	31	227710	227739	2.6e-09	Chromosome	34	80	3338441	3338395	9.3e-19
381459_1	GAAGTTCCGACCTGCACGAATGGCGTAATGATGGCCAGGAGAATTTGGGTGGGTATCTTTTTATTAGCAGCACTGCTGGCGGCGCTGTG	Chromosome	2	39	3424832	3424795	1.1e-13	Chromosome	42	88	3338441	3338395	1.1e-18
381460_1	GAAGTTCCGACCTGCACGAATGGCGTAATGATGGCCAGGCAGAATTTGGGTGGGTATCTTTTTATTAGCAGCACTGCTGGCGGCGCTGTG	Chromosome	2	40	4170592	4170630	3e-14	Chromosome	43	89	3338441	3338395	1.1e-18
381463_1	GAAGTTCCGACCTGCACGAATGGCGTAATGATGGCCAGGCTAGAATTTGGGTGGGTATCTTTTTATTAGCTGCACTGCTGGCGGCGCTGTG	Chromosome	2	41	2727233	2727194	8.5e-15	Chromosome	44	90	3338441	3338395	5.1e-17
381462_1	GAAGTTCCGACCTGCACGAATGGCGTAATGATGGCCAGGCTAGAATTTGGGTGGGCATCTTTTTATTAGCAGCACTGCTGGCGGCGCTGTG	Chromosome	2	41	4170592	4170631	8.5e-15	Chromosome	44	90	3338441	3338395	5.1e-17
381464_1	GAAGTTCCGACCTGCACGAATGGCGTAATGATGGCCAGGCTATTTGGGTGGGTATCTTTTTATTAGCAGCACTGCTGGCGGCGCTGTG	Chromosome	2	41	3424832	3424793	8.1e-15	Chromosome	42	87	3338440	3338395	3.8e-18
381461_1	GAAGTTCCGACCTGCACGAATGGCGTAATGATGGCCAGGCTAGAATTTGGGCGGGTATCTTTTTATTAGCAGCACTGCTGGCGGCGCTGTG	Chromosome	2	41	2727233	2727194	8.5e-15	Chromosome	44	90	3338441	3338395	5.1e-17
381489_1	GAAGTTCCGACCTGCACGAATGGCGTAATGATGGCCGGGCTAGAATTTGGGTGGGTATCTTTTTATTAGCAGCACTGCTGGCGGCGCTGTG	Chromosome	2	41	3424832	3424793	4e-13	Chromosome	44	90	3338441	3338395	1.1e-18
381582_1	GAAGTTCCGGCCTGCACGAATGGCGTAATGATGGCCAGGCTAGAATTTGGGTGGGTATCTTTTTATTAGCAGCACTGCTGGCGGCGCTGTG	Chromosome	2	41	4039471	4039510	4e-13	Chromosome	44	90	3338441	3338395	1.1e-18
381881_1	GAATAAATAATGATGAAGCGTGATCACGGAATAAATCATCATGAAGACG	Chromosome	2	20	986990	986972	0.0016	Chromosome	17	34	3456654	3456637	0.0057
382986_1	GAATAGTTGGGCCGATTGTGGCACCGCACAGGCGTAATACTCTGGGGCCAGCAAATGCTGGCCTGATTTTTTCTTGAGGGAAGACTG	Chromosome	2	42	4439532	4439572	2.2e-15	Chromosome	41	86	3101669	3101624	3.7e-18
383039_1	GAATAGTTGGGCCGATTGTGGCACCGGTCTGCGAGTCAGACCATGGTAGCAAAGCTACCGTTTTTCACTTCCTGG	Chromosome	2	26	4439532	4439556	1.4e-06	Chromosome	26	74	2942790	2942838	1.4e-16
383158_1	GAATATAAAATGTCCGGTTTGCCACCAGGGAGAAATTTTCCCTGGTGTTGGCGCAGTATTCGCGCACCCCGGTCC	Chromosome	2	36	3168249	3168215	1.8e-10	Chromosome	37	74	3350642	3350679	8.5e-14
383247_1	GAATATGAAATGTCCGGTTTGCCACCAGGGAGAAATTTTCCCGGGTGTGGGCGCAGTATTCGCGCACCCCGGTCC	Chromosome	2	36	3168249	3168215	3.9e-12	Chromosome	37	74	3350642	3350679	1.8e-10
383246_1	GAATATGAAATGTCCGGTTTGCAACCAGGGAGAAATTTTCCCTGGTGTTGGCGCAGTATTCGCGCACCCCGGTCC	Chromosome	2	36	3168249	3168215	1.8e-10	Chromosome	37	74	3350642	3350679	8.5e-14
383244_1	GAATATGAAATGTCAGGTTTGCCACCAGGGAGAAATTTTCCCTGGTGTTGGCGCAGTATTCGCGCACCCCGGTCC	Chromosome	2	36	3168249	3168215	1.8e-10	Chromosome	37	74	3350642	3350679	8.5e-14
383245_1	GAATATGAAATGTCCGATTTGCCACCAGGGAGAAATTTTCCCTGGTGTTGGCGCAGTATTCGCGCACCCCGGTCC	Chromosome	2	36	3168249	3168215	1.8e-10	Chromosome	37	74	3350642	3350679	8.5e-14
383248_1	GAATATGAAATGTCCGGTTTGCCACCAGGGAGAAATTTTCCCTGGTGGTGGCGCAGTATTCGCGCACCCCGGTCC	Chromosome	2	36	3168249	3168215	3.9e-12	Chromosome	37	74	3350642	3350679	3.9e-12
383249_1	GAATATGAAATGTCCGGTTTGCCACCAGGGAGAAATTTTCCCTGGTGTTGGCGCAGAATTCGCGCACCCCGGTCC	Chromosome	2	36	3168249	3168215	3.9e-12	Chromosome	37	74	3350642	3350679	3.9e-12
383250_1	GAATATGAAATGTCCGGTTTGCCACCAGGGAGAAATTTTCCCTGGTGTTGGCGCAGTAATCGCGCACCCCGGTCC	Chromosome	2	36	3168249	3168215	3.9e-12	Chromosome	37	74	3350642	3350679	3.9e-12
383251_1	GAATATGAAATGTCCGGTTTGCCACCAGGGAGAAATTTTCCCTGGTGTTGGCGCAGTATTCGCGCACACCGGTCC	Chromosome	2	36	3168249	3168215	3.9e-12	Chromosome	37	74	3350642	3350679	3.9e-12
383252_1	GAATATGAAATGTCCGGTTTGCCACCAGGGAGAAATTTTCCCTGGTGTTGGCGCAGTATTCGCGCACCCAGGTCC	Chromosome	2	36	3168249	3168215	3.9e-12	Chromosome	37	74	3350642	3350679	3.9e-12
383253_1	GAATATGAAATGTCCGGTTTGCCACCAGGGAGAAATTTTCCCTGGTGTTGGCGCAGTATTCGCGCACCCCAGTCC	Chromosome	2	36	3168249	3168215	3.9e-12	Chromosome	37	74	3350642	3350679	3.9e-12
383255_1	GAATATGAAATGTCCGGTTTGCCACCAGGGAGAAATTTTCCCTGGTGTTGGCGCAGTATTCGCGCACCCCGGTCG	Chromosome	2	36	3168249	3168215	3.9e-12	Chromosome	37	74	3350642	3350679	8.5e-14
383254_1	GAATATGAAATGTCCGGTTTGCCACCAGGGAGAAATTTTCCCTGGTGTTGGCGCAGTATTCGCGCACCCCGGTCA	Chromosome	2	36	3168249	3168215	3.9e-12	Chromosome	37	74	3350642	3350679	8.5e-14
383256_1	GAATATGAAATGTCCGGTTTGCCACCAGGGAGAAATTTTCCCTGGTGTTGGCGCAGTATTCGCGCACCCCTGTCC	Chromosome	2	36	3168249	3168215	3.9e-12	Chromosome	37	74	3350642	3350679	3.9e-12
383260_1	GAATATGAAATGTCCGGTTTGCCACCAGGGAGGAATTTTCCCTGGTGTTGGCGAAGTATTCGCGCACCCCGGTCC	Chromosome	2	36	3168249	3168215	1.8e-10	Chromosome	37	74	3350642	3350679	3.9e-12
383257_1	GAATATGAAATGTCCGGTTTGCCACCAGGGAGAAATTTTCCCTGGTGTTGGCGCAGTATTCGCGCATCCCGGTCC	Chromosome	2	36	3168249	3168215	3.9e-12	Chromosome	37	74	3350642	3350679	3.9e-12
383258_1	GAATATGAAATGTCCGGTTTGCCACCAGGGAGAAATTTTCCCTGGTGTTGTCGCAGTATTCGCGCACCCCGGTCC	Chromosome	2	36	3168249	3168215	3.9e-12	Chromosome	37	74	3350642	3350679	3.9e-12
383262_1	GAATATGAAATGTCTGGTTTGCCACCAGGGAGAAATTTTCCCTGGTGTTGGCGCAGTATTCGCGCACCCCGGTCC	Chromosome	2	36	3168249	3168215	1.8e-10	Chromosome	37	74	3350642	3350679	8.5e-14
383265_1	GAATATGAAGTGTCCGGTTTGCCACCAGGGAGAAATTTTCCCTGGTGTTGGCGCAGTATTCGCGCACCCCGGTCC	Chromosome	2	36	3168249	3168215	1.8e-10	Chromosome	37	74	3350642	3350679	8.5e-14
384591_1	GAATCCGTATGTCACTGGTTCGAGTCCAGTCAGAGGAGCAGTATGTCACTGGTTCGAGTCCAGTCAGAGGAGC	Chromosome	2	39	2058066	2058029	8.2e-14	Chromosome	41	73	2044590	2044622	4.9e-11
384594_1	GAATCCGTATGTCACTGGTTCGAGTCCAGTCAGAGGAGCCAACGGAATACGTATGTCACTGGTTCGAGTCCAGTCAAAGGAGCCAG	Chromosome	2	42	2059887	2059927	2.2e-15	Chromosome	46	85	2044585	2044624	1.7e-11
384601_1	GAATCCGTATGTCACTGGTTCGAGTCCAGTCAGAGGAGCCAGGAATCCGTATGTCACTGGTTCGAGTCCAGTCAGAGGAGCCAG	Chromosome	2	41	2058066	2058027	7.6e-15	Chromosome	44	83	2062296	2062335	7.6e-15
384610_1	GAATCCGTATGTCACTGGTTCGAGTCCAGTCAGAGGAGCGGAATCCGTATGTCACTGGTTCGAGTCCAGTCAGAGGAGCC	Chromosome	2	39	2058066	2058029	9.3e-14	Chromosome	42	80	2062296	2062334	2.6e-14
385390_1	GAATCTTTGATCCTTAAGAAAGTCTCCGGGACCGCGATGGTAAAAGGGTAAGGGAGGATTTCCCCCCCATTTGATAA	Chromosome	2	41	1806153	1806114	3.2e-13	Chromosome	44	75	3195238	3195207	1.9e-05
386879_1	GAATGGATATTGGCGGCGCTATTCTGGCAAACACAGAGGAAGACCTTACGAGCAAGACATTTGCCCGCAGCAGCCTGAC	Chromosome	2	31	1312136	1312107	2.5e-09	Chromosome	36	77	1511642	1511683	1.2e-12
386993_1	GAATGGCGTGCTGGTATTTACCCCATCACGGACTGGCGTGATGGTATTTACCG	Chromosome	2	22	1330551	1330531	0.00014	Chromosome	27	44	1408786	1408803	0.0066
388050_1	GAATTCCTCTTTGACGGGCCAATAGTTGTTCGTTGGAGCCTGGCCTATCCAGGCCGCCGTCGCAAACCT	Chromosome	2	25	507245	507268	4.6e-06	Chromosome	26	68	4179781	4179823	1.3e-11
388292_1	GAATTGAGAGATTTAGAGAATATACATGCAACCTGGGAAAAGCTTCAGTCCGGGTTATTGTTATTAGAAC	Chromosome	2	45	1739887	1739930	1.7e-15	Chromosome	42	69	3890394	3890421	1.3e-06
389068_1	GAATTGGTCTGCGATTCAGACCATGGTAGCAAAGCGACCTTGTACATTTACCCTGTCTGTCCATAGTGAACGGATATGACAGGGTGAGAAT	Chromosome	2	69	2942786	2942865	3e-19	Chromosome	70	88	2946056	2946038	0.004
389069_1	GAATTGGTCTGCGATTCAGACCATGGTAGCAAAGCTACCTGTACATTTACCCTGTCTGTCCATAGTGAACGGATATGACAGGGTGAGAAT	Chromosome	2	68	2942786	2942865	8.3e-20	Chromosome	69	87	2946056	2946038	0.004
389076_1	GAATTGGTCTGCGATTCAGACCATGGTAGCAAAGCTGCCTTGTACATTTACCCTGTCTGTCCATAGTGAACGGATATGACAGGGTGAGAAT	Chromosome	2	69	2942786	2942865	3e-19	Chromosome	70	88	2946056	2946038	0.004
389072_1	GAATTGGTCTGCGATTCAGACCATGGTAGCAAAGCTACCTTGTACATTTACCCCGTCTGTCCATAGTGAACGGATATGACAGGGTGAGAAT	Chromosome	2	69	2942786	2942865	3e-19	Chromosome	70	88	2946056	2946038	0.004
389071_1	GAATTGGTCTGCGATTCAGACCATGGTAGCAAAGCTACCTTGTACATCTACCCTGTCTGTCCATAGTGAACGGATATGACAGGGTGAGAAT	Chromosome	2	69	2942786	2942865	3e-19	Chromosome	70	88	2946056	2946038	0.004
389195_1	GAATTGGTCTGCGATTCTGACCATGGTAGCAAAGCTACCTTGTACATTTACCCTGTCTGTCCATAGTGAACGGATATGACAGGGTGAGAAT	Chromosome	2	69	2942786	2942865	3e-19	Chromosome	70	88	2946056	2946038	0.004
389197_1	GAATTGGTCTGCGATTTAGACCATGGTAGCAAAGCTACCTTGTACATTTACCCTGTCTGTCCATAGTGAACGGATATGACAGGGTGAGAAT	Chromosome	2	69	2942786	2942865	3e-19	Chromosome	70	88	2946056	2946038	0.004
389529_1	GAATTTGAAATGTCCGGTTTGCCACCAGGGAGAAATTTTCCCTGGTGTTGGCGCAGTATTCGCGCACCCCGGTCC	Chromosome	2	36	3168249	3168215	1.8e-10	Chromosome	37	74	3350642	3350679	8.5e-14
390197_1	GACAAACTCAGGCTGCGGTAAGTACATCACGGACAAACTCAGGCTGAGGTAAGTG	Chromosome	2	23	1331803	1331824	4.2e-05	Chromosome	25	45	1029135	1029155	0.007
390936_1	GACAAGCAGGGGGTCGGCGGTTCGATCCCGTCATCACCGACAAGCAGGGGGTCGGCGGTTCGATCCCGTCATCACCCACCA	Chromosome	2	41	781102	781141	1.6e-11	Chromosome	40	81	2521085	2521126	2.6e-14
391039_1	GACAAGGAGGGGGTCGGCGATTCGATCCCGTCATCACCCACAAGGAGGGGGTCGGCGATTCGATCCCGTCATCACCCACCA	Chromosome	2	41	2521207	2521246	3.4e-13	Chromosome	40	81	781102	781143	2.6e-14
391040_1	GACAAGGAGGGGGTCGGCGGCTCGATCCCGTCATCACCCACAAGGAGGGGGTCGGCGGCTCGATCCCGTCATCACCCACCA	Chromosome	2	41	2521207	2521246	3.4e-13	Chromosome	40	81	780799	780840	2.6e-14
391045_1	GACAAGGAGGGGGTCGGCGGTTCGATCCCGCCATCACGGACAAGGAGGGGGTCGGCGGTTCGATCCCGCCATCACCCACCA	Chromosome	2	37	781102	781137	5.7e-11	Chromosome	40	81	2521207	2521248	2.6e-14
391047_1	GACAAGGAGGGGGTCGGCGGTTCGATCCCGTAATCACCCACCGGACAAGGAGGGGGTCGGCGGTTCGATCCCGTAATCACCCACCACTTTG	Chromosome	2	42	780799	780839	1.1e-13	Chromosome	45	90	2521085	2521130	1.8e-16
391051_1	GACAAGGAGGGGGTCGGCGGTTCGATCCCGTCATCACCCACAAGGAGGGGGTCGGCGGTTAGATCCAGTCATCACCCACCA	Chromosome	2	41	781102	781141	7.3e-15	Chromosome	40	81	2521207	2521248	1.2e-12
391052_1	GACAAGGAGGGGGTCGGCGGTTCGATCCCGTCATCACCCACAAGGAGGGGGTCGGCGGTTCGAACCCGTCATCACCCACCG	Chromosome	2	41	2521085	2521124	7.3e-15	Chromosome	40	80	780799	780839	9.4e-14
391054_1	GACAAGGAGGGGGTCGGCGGTTCGATCCCGTCATCACCCACAAGGAGGGGGTCGGCGGTTCGATCAAGTCATCAACCACCA	Chromosome	2	41	781102	781141	7.3e-15	Chromosome	40	81	2521207	2521248	5.7e-11
391059_1	GACAAGGAGGGGGTCGGCGGTTCGATCCCGTCATCACCCACAAGGAGGGGGTCGGCTGTTCGAACCAGTCATCACCCACCA	Chromosome	2	41	780799	780838	7.3e-15	Chromosome	40	81	2521085	2521126	5.7e-11
391058_1	GACAAGGAGGGGGTCGGCGGTTCGATCCCGTCATCACCCACAAGGAGGGGGTCGGCGGTTCGATCCCGTCAGCACCCACCA	Chromosome	2	41	780799	780838	7.3e-15	Chromosome	40	81	2521085	2521126	2.6e-14
391060_1	GACAAGGAGGGGGTCGGCGGTTCGATCCCGTCATCACCCACAAGGAGGGGGTCGGCTGTTCGATCCCGTCATCACCCACCA	Chromosome	2	41	2521207	2521246	7.3e-15	Chromosome	40	81	780799	780840	2.6e-14
391065_1	GACAAGGAGGGGGTCGGCGGTTCGATCCCGTCATCACCCACACGGACAAGGAGGGGGTCGGCGGTTTGATCCAGTCATCACCCACCA	Chromosome	2	41	780799	780838	8e-15	Chromosome	46	87	2520965	2521006	1.3e-12
391070_1	GACAAGGAGGGGGTCGGCGGTTCGATCCCGTCATCACCCACCACGGACAAGGAGGGGGTCTGCGGTTCGATCCCGTCATCACCCACCA	Chromosome	2	44	781102	781144	1.7e-16	Chromosome	47	88	2520965	2521006	2.9e-14
391074_1	GACAAGGAGGGGGTCGGCGGTTCGATCCCGTCATCACCCACCGGACAAGGAGGGGGTCGGCGGTTCGATCCCGTAATCACCCACCACTTTG	Chromosome	2	42	780799	780839	2.4e-15	Chromosome	45	90	2521085	2521130	1.8e-16
391075_1	GACAAGGAGGGGGTCGGCGGTTCGATCCCGTCATCACCCACCGGACAAGGAGGGGGTCGGCGGTTCGATCTCGTCATCACCCACCACTTTG	Chromosome	2	42	780799	780839	2.4e-15	Chromosome	45	90	2521085	2521130	1.8e-16
391082_1	GACAAGGAGGGGGTCGGCGGTTCGATCCCGTCATCACCCCGGACAAGGAGGGGGTCGGCGGTTCGATCCCGTCATCACCCACCCCTTAA	Chromosome	2	39	780799	780836	1.1e-13	Chromosome	43	87	2521085	2521129	6.4e-16
391090_1	GACAAGGAGGGGGTCGGCGGTTCGATCCCGTCATCACGCACAAGGAGGGGGTCGGCGGTTCGAACCCGACATCACCCACCA	Chromosome	2	41	781102	781141	3.4e-13	Chromosome	40	81	2521207	2521248	1.2e-12
391089_1	GACAAGGAGGGGGTCGGCGGTTCGATCCCGTCATCACCGGACAAGGAGGGGGTCGGCGGTTCGATCCCGTCATCACCCACCACTTTG	Chromosome	2	38	780799	780835	3.7e-13	Chromosome	41	86	2521085	2521130	3.7e-18
391091_1	GACAAGGAGGGGGTCGGCGGTTCGATCCCGTCATCACGCACAAGGAGGGGGTCGGCGGTTCGAACCCGTCATCACCCACCA	Chromosome	2	41	781102	781141	3.4e-13	Chromosome	40	81	2521085	2521126	2.6e-14
391092_1	GACAAGGAGGGGGTCGGCGGTTCGATCCCGTCATCACGCACAAGGAGGGGGTCGGCGGTTCGAACGAGACATCACCCACCA	Chromosome	2	41	2520965	2521004	3.4e-13	Chromosome	40	81	780799	780840	2.6e-09
391093_1	GACAAGGAGGGGGTCGGCGGTTCGATCCCGTCATCACGCACAAGGAGGGGGTCGGCGGTTCGATCCAGTCATCAACCACCA	Chromosome	2	41	2521207	2521246	3.4e-13	Chromosome	40	81	781102	781143	1.2e-12
391095_1	GACAAGGAGGGGGTCGGCGGTTCGATCCCGTCATCACGCACAAGGAGGGGGTCGGCGGTTCGATCCCGACATCACCCACCG	Chromosome	2	41	781102	781141	3.4e-13	Chromosome	40	80	2520965	2521005	9.4e-14
391096_1	GACAAGGAGGGGGTCGGCGGTTCGATCCCGTCATCACGCACAAGGAGGGGGTCGGCGGTTCGATCCCGTCAGCACCCACCG	Chromosome	2	41	780799	780838	3.4e-13	Chromosome	40	80	2521085	2521125	9.4e-14
391098_1	GACAAGGAGGGGGTCGGCGGTTCGATCCCGTCATCACGCACAAGGAGGGGGTCGGCGGTTCGATCCCGTCATCACCCACCG	Chromosome	2	41	2521085	2521124	3.4e-13	Chromosome	40	80	780799	780839	2e-15
391101_1	GACAAGGAGGGGGTCGGCGGTTCGATCCCGTCATCACGCACAAGGAGGGGGTCGGCGGTTCGATCGCGTCATCACCCACCA	Chromosome	2	41	781102	781141	3.4e-13	Chromosome	40	81	2520965	2521006	2.6e-14
391102_1	GACAAGGAGGGGGTCGGCGGTTCGATCCCGTCATCACGCACAAGGAGGGGGTCGGCGGTTCGATTCCGACATCACCCACCA	Chromosome	2	41	2521085	2521124	3.4e-13	Chromosome	40	81	781102	781143	1.2e-12
391103_1	GACAAGGAGGGGGTCGGCGGTTCGATCCCGTCATCACGCACAAGGAGGGGGTCGGCGGTTGGATCCCGTCATCACCCACCA	Chromosome	2	41	781102	781141	3.4e-13	Chromosome	40	81	2521085	2521126	2.6e-14
391097_1	GACAAGGAGGGGGTCGGCGGTTCGATCCCGTCATCACGCACAAGGAGGGGGTCGGCGGTTCGATCCCGTCATCAACCACCA	Chromosome	2	41	781102	781141	3.4e-13	Chromosome	40	81	2521085	2521126	2.6e-14
391109_1	GACAAGGAGGGGGTCGGCGGTTCGATCCCGTCATCACGGACAAGGAGGGGGTCGGCGGTTCGAACCAGTCATCAACCACCG	Chromosome	2	37	780799	780834	1.2e-12	Chromosome	40	80	2521207	2521247	2e-10
391110_1	GACAAGGAGGGGGTCGGCGGTTCGATCCCGTCATCACGGACAAGGAGGGGGTCGGCGGTTCGAACCCGTCATCAACCACCA	Chromosome	2	37	2521207	2521242	1.2e-12	Chromosome	40	81	780799	780840	1.2e-12
391112_1	GACAAGGAGGGGGTCGGCGGTTCGATCCCGTCATCACGGACAAGGAGGGGGTCGGCGGTTCGAACCCGTCATCACCTACCA	Chromosome	2	37	2521207	2521242	1.2e-12	Chromosome	40	81	780799	780840	1.2e-12
391115_1	GACAAGGAGGGGGTCGGCGGTTCGATCCCGTCATCACGGACAAGGAGGGGGTCGGCGGTTCGATCCAGTCATCACCCACCG	Chromosome	2	37	2521207	2521242	1.2e-12	Chromosome	40	80	780799	780839	9.4e-14
391114_1	GACAAGGAGGGGGTCGGCGGTTCGATCCCGTCATCACGGACAAGGAGGGGGTCGGCGGTTCGATCCAGTCATCACCCACCA	Chromosome	2	37	780799	780834	1.2e-12	Chromosome	40	81	2521207	2521248	2.6e-14
391116_1	GACAAGGAGGGGGTCGGCGGTTCGATCCCGTCATCACGGACAAGGAGGGGGTCGGCGGTTCGATCCCGACATCACCCACCA	Chromosome	2	37	2521085	2521120	1.2e-12	Chromosome	40	81	780799	780840	2.6e-14
391118_1	GACAAGGAGGGGGTCGGCGGTTCGATCCCGTCATCACGGACAAGGAGGGGGTCGGCGGTTCGATCCCGTCATCACCAACCA	Chromosome	2	37	2521207	2521242	1.2e-12	Chromosome	40	81	781102	781143	2.6e-14
391120_1	GACAAGGAGGGGGTCGGCGGTTCGATCCCGTCATCACGGACAAGGAGGGGGTCGGCGGTTCTATCCCGTCATCACCCACCG	Chromosome	2	37	781102	781137	1.2e-12	Chromosome	40	80	2520965	2521005	9.4e-14
391123_1	GACAAGGAGGGGGTCGGCGGTTCGATCCCGTCATCACGGACAAGGAGGGGGTCGGCGGTTTTATTCAGTCATCACCCACCG	Chromosome	2	37	2521207	2521242	1.2e-12	Chromosome	40	80	781102	781142	9.5e-09
391122_1	GACAAGGAGGGGGTCGGCGGTTCGATCCCGTCATCACGGACAAGGAGGGGGTCGGCGGTTTGATCCCGTCATCACCCACCA	Chromosome	2	37	781102	781137	1.2e-12	Chromosome	40	81	2520965	2521006	2.6e-14
391125_1	GACAAGGAGGGGGTCGGCGGTTCGATCCCGTCATCACGGACAAGGAGGGGGTCGGCGTTTCGATCCCGACATCACCCACCG	Chromosome	2	37	780799	780834	1.2e-12	Chromosome	40	80	2521085	2521125	4.4e-12
391127_1	GACAAGGAGGGGGTCGGCGGTTCGATCCCGTCATCACGGACAAGGAGGGGGTCGGCGTTTTGATCCCGACATCACCCACCA	Chromosome	2	37	780799	780834	1.2e-12	Chromosome	40	81	2521085	2521126	5.7e-11
391129_1	GACAAGGAGGGGGTCGGCGGTTCGATCCCGTCATCACGGACAAGGAGGGGGTTGGTGGTTCGATCCCGTCATCACCCACCG	Chromosome	2	37	781102	781137	1.2e-12	Chromosome	40	80	2521085	2521125	4.4e-12
391128_1	GACAAGGAGGGGGTCGGCGGTTCGATCCCGTCATCACGGACAAGGAGGGGGTTGGCGGTTCGATCCCGTCATCACCCACCA	Chromosome	2	37	781102	781137	1.2e-12	Chromosome	40	81	2521207	2521248	2.6e-14
391134_1	GACAAGGAGGGGGTGGGCGGTTCGATCCCGTCATCACGGACAAGGAGGGGGTGGGCGGTTCGATCCCGTCATCACCCACCA	Chromosome	2	37	2520965	2521000	5.7e-11	Chromosome	40	81	781102	781143	2.6e-14
391377_1	GACAATGATAGCCGAAGATTTTGCATTCCAGGAATTAGGCTTCTCGGAGGCATGGCGATTCCCGGAAGCT	Chromosome	2	24	4002929	4002907	1.7e-05	Chromosome	25	68	3102083	3102040	3.6e-12
392558_1	GACAGACCCTGACCATATTCTTGGTTCGTCAGGGTCTATATCACGGACAGACCCTGACCATATTCTTGGTTCGTCAGGGTCTGGCGG	Chromosome	45	68	2057279	2057302	0.00029	Chromosome	69	86	1291775	1291792	0.014
392568_1	GACAGACCCTGACCATATTTTTGGTTCGTCAGGGTCTGGATATCACGGACAGACCCTGACCATATTTTTGGTTCGTCAGGGTCTGGCGG	Chromosome	47	70	2057279	2057302	6.5e-06	Chromosome	71	88	1291775	1291792	0.014
392575_1	GACAGACCCTGACCATATTTTTGGTTCGTCAGGGTCTGGCGATATCACGGACAGACCCTGACCATGTTTTTGGTTCGTCAGGGTCTGGCGG	Chromosome	1	23	2057280	2057302	2.4e-05	Chromosome	24	42	1291775	1291793	0.004
392576_1	GACAGACCCTGACCATATTTTTGGTTCGTCAGGGTCTGGCGATATCACGGACAGACCCTGGCCATATTTTTGGTTCGTCAGGGTCTGGCGG	Chromosome	1	23	2057280	2057302	2.4e-05	Chromosome	24	42	1291775	1291793	0.004
392579_1	GACAGACCCTGACCATATTTTTGGTTCGTCAGGGTCTGGCGATCACGGACAGACCCTGACCATATTTTTGGTTCGTCAGGGTCTGGCGG	Chromosome	47	70	2057279	2057302	6.5e-06	Chromosome	71	88	1291775	1291792	0.014
393177_1	GACAGGGAGGGGGTCGGCGGTTCGATCCCGTCATCACCCACAGGGAGGGGGTCGGCGGTTCGATCCCGTCATCACCCACCA	Chromosome	2	41	781102	781141	3.4e-13	Chromosome	40	81	2521207	2521248	2.6e-14
393737_1	GACATCAGATTTCCTGGTGTAAAAGAAACAGGGGCGGAAATTCCAGCCCTCTCGAGTGTTACGTAGCACGC	Chromosome	2	22	2025310	2025290	0.00022	Chromosome	20	70	686837	686787	4.7e-16
394435_1	GACATTGGTTCCGGCGTGCTGGCGTCGCTCTCTGCGATGTTTTCAGTCACATTTTTAGCAGATAAAGAGTGG	Chromosome	2	41	3854952	3854991	6.2e-15	Chromosome	40	71	3396294	3396263	1.7e-05
396063_1	GACCCTGTCTGTCCATAGTGACACCGCCCTTGATTTGCCCTGCTGTAGCCATCACCAGAGCCAG	Chromosome	2	21	2942846	2942865	0.00068	Chromosome	22	63	3888498	3888539	1.9e-14
396300_1	GACCGACCTCGGCGTGAAAGCTATTGATGCGTCTTTACCGCCGAGGTTGCAGAC	Chromosome	2	29	1301653	1301680	8.7e-07	Chromosome	31	53	923135	923157	1.1e-05
396347_1	GACCGATCTCGGCGTGAAAGCTATTGACGCGTCTTTACCGCCGAGGTTGCAGAC	Chromosome	2	27	1301653	1301678	2.4e-07	Chromosome	31	53	923135	923157	1.1e-05
396329_1	GACCGAGAAAAGCCGTACTGCAAGCTCTGGTGACTACAGATACCGAGAAAAACCGTACTGCAAGCTCTGCTAACTAC	Chromosome	2	38	850654	850690	3.2e-13	Chromosome	41	58	4060746	4060763	0.012
396348_1	GACCGATCTCGGCGTGAAAGCTATTGATGCGTCCTTACCGCCGAGGTTGCAGAC	Chromosome	2	29	1301653	1301680	1.9e-08	Chromosome	31	53	923135	923157	0.00052
396353_1	GACCGATCTCGGCGTGAAAGCTATTGATGGGTCTTTACCGCCGAGGTTACAGAC	Chromosome	2	29	1301653	1301680	1.9e-08	Chromosome	31	53	923135	923157	0.00052
396354_1	GACCGATCTCGGCGTGAAAGCTATTGATGTGTCTTTACCGCCGAGGTTGCAGAC	Chromosome	2	29	1301653	1301680	1.9e-08	Chromosome	31	53	923135	923157	1.1e-05
396931_1	GACCGGTCTCGGCGTGAAAGCTATTGATGCGTCTTTACCGCCGAGGTTGCAGAC	Chromosome	2	29	1301653	1301680	8.7e-07	Chromosome	31	53	923135	923157	1.1e-05
399533_1	GACGCAGGAGGTCTGCGGTTCGATCCCGCATAGCTCCACCAACGGACGCAGGAGGTCTGCGGTTCGATACCGCATAGCTCCACCAG	Chromosome	2	41	3426997	3426958	7.9e-15	Chromosome	46	85	4037296	4037335	3.7e-13
399531_1	GACGCAGGAGGTCTGCGGTTCGATCCCGCATAGCTCAACCACGGACGCAGGAGGTCTGCGGTTCGATCCCGCATAGCTCCACCAG	Chromosome	2	41	3426997	3426958	3.6e-13	Chromosome	45	84	4037296	4037335	7.8e-15
399532_1	GACGCAGGAGGTCTGCGGTTCGATCCCGCATAGCTCCACAATCACGGACGCAGGAGGTCTGCGGTTCGATCCCGCATAGCTCCACCAG	Chromosome	2	43	225536	225577	2.9e-14	Chromosome	48	87	3426997	3426958	8.1e-15
399537_1	GACGCAGGAGGTCTGCGGTTCGATCCCGCATAGCTCCACCATCACGGACGCAGGAGGTATGCGGTTCGATCCCGCATAGCTCCACCAG	Chromosome	2	43	225536	225577	6.3e-16	Chromosome	48	87	4037296	4037335	3.8e-13
399551_1	GACGCAGGGGATCGCGGGTTCGAGTCCCGTCCGTTCCGCCACACGGACGCAGGGGATCGCGGGTTCGAGTCCCGTCCGTTCCGCCACCCTG	Chromosome	2	42	236968	237008	1.1e-13	Chromosome	47	90	3946909	3946952	2.4e-15
399565_1	GACGCAGGGGGTCACGGGTTCGAGTCCCGTCCGTTCCGCCACACGGACGCAGGGGGTCACGGGTTCGAGTCCCGTCCGTTCCGCCACCCCG	Chromosome	2	42	236968	237008	1.1e-13	Chromosome	47	89	3946909	3946951	8.5e-15
399566_1	GACGCAGGGGGTCCCGGGTTCGAGTCCCGTCCGTTCCGCCAACGGACGCAGGGGGTCCCGGGTTCGAGTCCCGTCCGTTCCGCCACCCTG	Chromosome	2	41	236968	237007	3.9e-13	Chromosome	46	89	3946909	3946952	2.3e-15
399567_1	GACGCAGGGGGTCCCGGGTTCGAGTCCCGTCCGTTCCGCCACACGGACGCAGGGGGTCCCGGGTTCGAGTCCCGTCCGTTCCGCCACCCTG	Chromosome	2	42	236968	237008	1.1e-13	Chromosome	47	90	3946909	3946952	2.4e-15
399568_1	GACGCAGGGGGTCGCAGGTTCGAGTCCCGTCCGTTCCGCCACACGGACGCAGGGGGTCGCAGGTTCGAGTCCCGTCCGTTCCGCCACCCTG	Chromosome	2	42	228965	229005	1.1e-13	Chromosome	47	90	3946909	3946952	2.4e-15
399575_1	GACGCAGGGGGTCGCGGGTTCGAGTCCCGTCACGGACGCAGGGGGTCGCGGGTTCGAGTCCCGTCCGTTCCGCCACCCTG	Chromosome	2	31	236968	236997	2.6e-09	Chromosome	36	79	3946909	3946952	4.3e-17
399577_1	GACGCAGGGGGTCGCGGGTTCGAGTCCCGTCCGTTCACGGACGCAGGGGGTCGCGGGTTCGAGTCCCGTCCGTCCCGCCACCCCG	Chromosome	2	36	236968	237002	4.7e-12	Chromosome	41	83	3946909	3946951	7.8e-15
399573_1	GACGCAGGGGGTCGCGGGTTCGAGTCCCATCCGTTCCGCCACACGGACGCAGGGGGTCGCGGGTTCGAGTCCCATCCGTTCCGCCACCCTG	Chromosome	2	42	228965	229005	1.1e-13	Chromosome	47	90	3946909	3946952	2.4e-15
399576_1	GACGCAGGGGGTCGCGGGTTCGAGTCCCGTCCGTCCCGCCACACGGACGCAGGGGGTCGCGGGTTCGAGTCCCGTCCGTCCCGCCACCCTG	Chromosome	2	42	228965	229005	1.1e-13	Chromosome	47	90	3946909	3946952	2.4e-15
399579_1	GACGCAGGGGGTCGCGGGTTCGAGTCCCGTCCGTTCCACCACACGGACGCAGGGGGTCGCGGGTTCGAGTCCCGTCCGTTCCACCACCCTG	Chromosome	2	42	228965	229005	1.1e-13	Chromosome	47	90	3946909	3946952	2.4e-15
399580_1	GACGCAGGGGGTCGCGGGTTCGAGTCCCGTCCGTTCCACGGACGCAGGGGGTCGCGGGTTCGAGTCCCGTCCGTTCCGCCACCCTG	Chromosome	2	37	236968	237003	1.3e-12	Chromosome	42	85	3946909	3946952	4.7e-17
399585_1	GACGCAGGGGGTCGCGGGTTCGAGTCCCGTCCGTTCCGCCACACGGACGCAGGGGGTCGCGGGTTCGAGTCCAGTCCGTTCCGCCACCCCG	Chromosome	2	42	236968	237008	2.4e-15	Chromosome	47	89	3946909	3946951	8.5e-15
399586_1	GACGCAGGGGGTCGCGGGTTCGAGTCCCGTCCGTTCCGCCACACGGACGCAGGGGGTCGCGGGTTCGAGTCCCGTCAGTTCCGCCACCCTG	Chromosome	2	42	236968	237008	2.4e-15	Chromosome	47	90	3946909	3946952	2.4e-15
399587_1	GACGCAGGGGGTCGCGGGTTCGAGTCCCGTCCGTTCCGCCACACGGACGCAGGGGGTCGCGGGTTCGAGTCCCGTCCGTTCAGCCACCCTG	Chromosome	2	42	228965	229005	2.4e-15	Chromosome	47	90	3946909	3946952	2.4e-15
399591_1	GACGCAGGGGGTCGCGGGTTCGAGTCCCGTCCGTTCCGCCACACGGACGCAGGTGGTCGCTGTTTCGAGTCCCGTCCGTTCCGCCACACTG	Chromosome	2	42	236968	237008	2.4e-15	Chromosome	47	87	228965	229005	2.4e-10
399589_1	GACGCAGGGGGTCGCGGGTTCGAGTCCCGTCCGTTCCGCCACACGGACGCAGGGGGTCGCGGGTTCGAGTCCCGTGCGTTCCGCCACCCCG	Chromosome	2	42	228965	229005	2.4e-15	Chromosome	47	89	3946909	3946951	8.5e-15
399600_1	GACGCAGGGGGTCGCGGGTTCGAGTCCCGTCCGTTCCGGACGCAGGGGGTCGCGGGTTCGAGCCCCGTACGTTGCACGAGCCTG	Chromosome	2	38	228965	229001	3.6e-13	Chromosome	40	73	236968	237001	3.6e-08
399595_1	GACGCAGGGGGTCGCGGGTTCGAGTCCCGTCCGTTCCGCCACGGACGCAGGGGGTCGCGGGTTCGAGTCCCGTCAGTTCCGCCACCCTG	Chromosome	2	42	228965	229005	2.3e-15	Chromosome	45	88	3946909	3946952	2.3e-15
399596_1	GACGCAGGGGGTCGCGGGTTCGAGTCCCGTCCGTTCCGCCACGGACGCAGGGGGTCGCGGGTTCGAGTCCCGTCCGTTCCGCCACCCTG	Chromosome	2	42	228965	229005	2.3e-15	Chromosome	45	88	3946909	3946952	4.9e-17
399597_1	GACGCAGGGGGTCGCGGGTTCGAGTCCCGTCCGTTCCGCCAGGACGCAGGGGGTCGCGGGTTCGAGTCCCGTCCGTTCCGCCACCCTG	Chromosome	2	41	236968	237007	8.1e-15	Chromosome	44	87	3946909	3946952	4.9e-17
399606_1	GACGCAGGGGGTCGCGGGTTCGGGTCCCGTCCGTTCCGCCACACGGACGCAGGGGGTCGCGGGTTCGGGTCCCGTCCGTTCCGCCACCCTG	Chromosome	2	42	236968	237008	1.1e-13	Chromosome	47	90	3946909	3946952	2.4e-15
399605_1	GACGCAGGGGGTCGCGGGTTCGGGTCCCGTCCGTTCCGCCACACGGACGCAGGGGGTCGCGGGTTCGGGTCCCGTCCGTACCGCCACCCTG	Chromosome	2	42	236968	237008	1.1e-13	Chromosome	47	90	3946909	3946952	1.1e-13
399604_1	GACGCAGGGGGTCGCGGGTTCGAGTCCCGTCTGTTCCGCCACACGGACGCAGGGGGTCGCGGGTTCGAGTCCCGTCTGTTCCGCCACCCTG	Chromosome	2	42	228965	229005	1.1e-13	Chromosome	47	90	3946909	3946952	2.4e-15
400027_1	GACGCGGGCGACTATAAATTCAAACACAAACGTCACGGACGCGGGCGACTATAAATTCAAACACAAACGTCGTCCGCGTGCGC	Chromosome	39	63	2891609	2891585	1.6e-06	Chromosome	63	82	1261298	1261279	0.00099
400028_1	GACGCGGGCGACTATAAATTCAAACACAAACGTCGTCCCACGGACGCGGGCGACTATAAATTCAAACACAAACGTCGTCCGCGTGCGC	Chromosome	44	68	2891609	2891585	1.8e-06	Chromosome	68	87	1261298	1261279	0.0011
400029_1	GACGCGGGCGACTATAAATTCAAACACAAACGTCGTCCGCCACGGACGCGGGCGACTATAAATTCAAACACAAACGTCGTCCGCGTGCGC	Chromosome	46	70	2891609	2891585	1.8e-06	Chromosome	70	89	1261298	1261279	0.0011
400030_1	GACGCGGGCGACTATAAATTCAAACACAAACGTCGTCCGCGCACAGACGCGGGCGACTATAAATTCAAACACAAACGTCGTCCGCGTGCGC	Chromosome	47	71	2891609	2891585	1.9e-06	Chromosome	71	90	1261298	1261279	0.0011
400031_1	GACGCGGGCGACTATAAATTCAAACACAAACGTCGTCCGCGGACGCGGGCGACTATAAATTCAAACACAAACGTCGTCCGCGTGCGC	Chromosome	43	67	2891609	2891585	1.7e-06	Chromosome	67	86	1261298	1261279	0.0011
400328_1	GACGCTTGCATTTTGAAATTCGTTACAAGGAAGTGCGAATGCTGACATAATTAACGATAAAGTGGGAGAC	Chromosome	2	30	2867683	2867655	7.7e-09	Chromosome	30	66	3425539	3425503	6e-10
400419_1	GACGGACGCGGGGTGGAGCAGCCTGGTAGCTCGTCGGGAGAATGAAATTCCTCTTTGACGGGCCAATAGCGATATTGGCCATTTTTTC	Chromosome	2	38	2947382	2947418	3.8e-13	Chromosome	41	87	507240	507286	1e-18
401240_1	GACGTGGGGGTTCAAGTCCCCCCCCTCGCACCAACGGACGTGGGGGTTCAAGTCCCCCCCCTCGCACCACGACTTTAAAGAC	Chromosome	1	34	4606111	4606078	1.6e-11	Chromosome	34	81	3982657	3982704	2.6e-19
401803_1	GACTAATTACAAGAACCAGGGGCGGAAATTCCAGCCCTCTCCTGAAAAACATAACCCATAAAATACAG	Chromosome	2	41	686843	686804	5.7e-15	Chromosome	42	64	2167115	2167137	1.6e-05
403554_1	GACTGAAAAAATCTTCAGATAAATCACGGACTGAAAAAATCTTCAGATG	Chromosome	4	24	2767610	2767630	0.0057	Chromosome	28	48	269064	269044	0.0057
404134_1	GACTGATGACATCGTTGCTGTAGGTCTGGTTTACCAGAAACGTGGCAGCCCCAGGGTTGATAGAAATATCTCCTGGGGCTTCATCA	Chromosome	2	37	574570	574535	1.3e-12	Chromosome	42	85	607779	607736	4.7e-17
404214_1	GACTGCAAGCTCTGGTGACTACAACAAAGCTAATAATAACCTTTGTGA	Chromosome	2	28	850669	850695	5.5e-08	Chromosome	27	46	2071356	2071375	0.00043
409738_1	GAGAGATGGCAATGCCGGGCGACAACATCAACCTGTTGTCGCCTGCTCTGAATTG	Chromosome	2	31	3470286	3470257	6.9e-08	Chromosome	30	54	1705704	1705728	4.2e-05
409741_1	GAGAGATGGTAATGCCGGGCGACAACATCAACCTGCTGTCGCCTGCTCTGGATTG	Chromosome	2	31	3470286	3470257	1.5e-09	Chromosome	30	54	1705704	1705728	4.2e-05
409747_1	GAGAGATGGTAATGCCGGGCGACAACATCAACCTGTTGTCGCCTGCTCTAGATTG	Chromosome	2	31	3470286	3470257	1.5e-09	Chromosome	30	54	1705704	1705728	4.2e-05
409750_1	GAGAGATGGTAATGCCGGGCGACGACATCAACCTGTTGTCGCCTGCTCTGGATTG	Chromosome	2	31	4176987	4177016	6.9e-08	Chromosome	30	54	1705704	1705728	9e-07
409749_1	GAGAGATGGTAATGCCGGGCGACAACATCCACCTGTTGTCGCCTGCTCTGGATTG	Chromosome	2	29	3470286	3470259	1.9e-08	Chromosome	31	54	1705705	1705728	3.2e-06
409751_1	GAGAGATGGTAGTGCCGGGCGACAACATCAACCTGTTGTCGCCTGCTCTGGATTG	Chromosome	2	31	4176987	4177016	6.9e-08	Chromosome	30	54	1705704	1705728	9e-07
409752_1	GAGAGATGTTAATGCCGGGCGACAACATCAACCTGTTGTCGCCTGCTCTGGATTG	Chromosome	2	31	4176987	4177016	6.9e-08	Chromosome	30	54	1705704	1705728	9e-07
409955_1	GAGAGCCCCTCGATCTCAATCAGTGTCTGGAAGAAGAAGATAAAAACAG	Chromosome	2	24	4394062	4394040	9.5e-06	Chromosome	27	49	1716367	1716345	9.5e-06
410145_1	GAGAGGGCGACCGGCGTTGATTTGCTTTCGCTGCGGTCGCCCAGACAG	Chromosome	1	25	3709920	3709896	7.1e-07	Chromosome	26	46	3536944	3536924	0.00012
410146_1	GAGAGGGCGACCGGCGTTGATTTGCTTTCGCTGCGGTCGCCCGGAGAGGGCGACCGGCGTTGATTTGCTTTCGCTGCGGTCGCCCAGACAA	Chromosome	43	68	3709921	3709896	5.2e-07	Chromosome	69	89	3536944	3536924	0.00031
410147_1	GAGAGGGCGACCGGCGTTGATTTGCTTTCGCTGCGGTCGCCCGGAGAGGGCGACCGGCGTTGATTTGCTTTCGCTGCGGTCGCCCAGACGG	Chromosome	43	68	3709921	3709896	5.2e-07	Chromosome	69	89	3536944	3536924	0.00031
410148_1	GAGAGGGCGACCGGCGTTGATTTGCTTTCGCTGCGGTCGCCCGGAGAGGGCGACCGGCGTTGATTTGCTTTCGCTGCGGTCGCCCAGGCAG	Chromosome	43	68	3709921	3709896	5.2e-07	Chromosome	69	87	3536944	3536926	0.004
411107_1	GAGATCTCTATTTTTATCTGAACTTTTTTTTATCACGGAGATCTATATTTTTAACTGAACTATTTTG	Chromosome	2	34	576944	576976	2e-09	Chromosome	35	52	4240274	4240257	0.0095
411749_1	GAGCAAAGCAGCGTTCAAAAAGAAAGTACTGTCCCTCCTGGTCCCAGCTCTGCTGGTAGCAGAC	Chromosome	2	21	3477311	3477292	0.00068	Chromosome	23	62	2312740	2312701	5.2e-15
412692_1	GAGCCATGGCGCTGGCGAACATCGACCCGATCATAGTGCATCAGTTCGCCATCGCCCAGGCGAGCCAG	Chromosome	2	34	2338272	2338240	2.1e-09	Chromosome	36	66	4399840	4399870	2.7e-08
413214_1	GAGCCGTGGCGCTGGCGAACATCGACCCGATCATAGTGCATCAGCTCGCCATCGCCCCGGCGAGCCAG	Chromosome	2	34	2338272	2338240	4.4e-11	Chromosome	36	66	4399840	4399870	2.7e-08
413213_1	GAGCCGTGGCGCTGGCGAACATCGACACGATCATAGTGCATCAGTTCGCCATCGCCCCGGAGAGCCAG	Chromosome	2	34	2338272	2338240	2.1e-09	Chromosome	36	66	4399840	4399870	2.7e-08
413212_1	GAGCCGTGGCGCTGGCGAACATCAACCCGATCATAGTGCATCAGTTCGCCATCGCCCCGGCGAGCCAG	Chromosome	2	34	2338272	2338240	2.1e-09	Chromosome	36	66	4399840	4399870	5.7e-10
413216_1	GAGCCGTGGCGCTGGCGAACATCGACCCGATCATAGTGCATCAGTTCGCCATCCCCGGCGAGCCAG	Chromosome	2	34	2338272	2338240	4.2e-11	Chromosome	36	64	4399840	4399870	5.5e-05
413217_1	GAGCCGTGGCGCTGGCGAACATCGACCCGATCATAGTGCATCAGTTCGCCATCGAACCGGCGAGCCAG	Chromosome	2	34	2338272	2338240	4.4e-11	Chromosome	36	66	4399840	4399870	1.2e-06
413215_1	GAGCCGTGGCGCTGGCGAACATCGACCCGATCATAGTGCATCAGTTAGCCATCGCCCCGGCGAGCCAG	Chromosome	2	34	2338272	2338240	4.4e-11	Chromosome	36	66	4399840	4399870	2.7e-08
413218_1	GAGCCGTGGCGCTGGCGAACATCGACCCGATCATAGTGCATCAGTTCGCCATCGCCCCAGCGAGCCAG	Chromosome	2	34	2338272	2338240	4.4e-11	Chromosome	36	66	4399840	4399870	2.7e-08
413220_1	GAGCCGTGGCGCTGGCGAACATCGACCCGATCATAGTGCATCAGTTCTCCATCGCCCCGGCGAGCCAG	Chromosome	2	34	2338272	2338240	4.4e-11	Chromosome	36	66	4399840	4399870	2.7e-08
413219_1	GAGCCGTGGCGCTGGCGAACATCGACCCGATCATAGTGCATCAGTTCGCCATCGCCTCGGCGAGCCAG	Chromosome	2	34	2338272	2338240	4.4e-11	Chromosome	36	66	4399840	4399870	2.7e-08
413221_1	GAGCCGTGGCGCTGGCGAACATCGATCCGATCATAGTGCATCAGTTCGCCATCGCCCCGGCGAGCCAG	Chromosome	2	34	2338272	2338240	2.1e-09	Chromosome	36	66	4399840	4399870	5.7e-10
413812_1	GAGCGATGGTAATGCCGGGCGACAACATCAACCTGTTGTCGCCTGCTCTGGATTG	Chromosome	2	31	3470286	3470257	6.9e-08	Chromosome	30	54	1705704	1705728	9e-07
414728_1	GAGCTACCAGGAACCACCTCCTTAGCCTGTGTACTGGTATCCTGGTACGACAACGA	Chromosome	5	33	2167146	2167174	5.5e-09	Chromosome	33	56	1863691	1863714	3.3e-06
414769_1	GAGCTATACCAGGAACCACCTCCTTAGCCTGTGTACTGGTATCCTGGTACGACAACGA	Chromosome	2	35	2167141	2167174	4.5e-10	Chromosome	35	58	1863691	1863714	3.5e-06
414788_1	GAGCTATTTTACGCAGCGGTGCGTTATCACGGAGCTATTTCACGCAGCGGTGCGG	Chromosome	8	35	2436868	2436895	0.0019	Chromosome	33	54	3350379	3350358	4.2e-05
415182_1	GAGCTGTACCAGGAACCACCCCCTTAGCCTGTGTACTGGTATCCTGGTACGACAACGA	Chromosome	2	35	2167141	2167174	4.5e-10	Chromosome	35	58	1863691	1863714	3.5e-06
415184_1	GAGCTGTACCAGGAACCACCTCCTTAGCCTGCGTACTGGTATCCTGGTACGACAACGA	Chromosome	2	35	2167141	2167174	4.5e-10	Chromosome	35	58	1863691	1863714	3.5e-06
415185_1	GAGCTGTACCAGGAACCACCTCCTTAGCCTGTGTACCGGTATCCTGGTACGACAACGA	Chromosome	2	35	2167141	2167174	9.7e-12	Chromosome	38	58	1863694	1863714	0.00016
415186_1	GAGCTGTACCAGGAACCACCTCCTTAGCCTGTGTACTAGTATCCTGGTACGACAACGA	Chromosome	2	35	2167141	2167174	9.7e-12	Chromosome	35	58	1863691	1863714	0.00016
415192_1	GAGCTGTACCAGGAACCACCTCCTTAGCCTGTGTACTGGTATCCTGGTACGACAAAGA	Chromosome	2	35	2167141	2167174	9.7e-12	Chromosome	35	58	1863691	1863714	0.00016
415196_1	GAGCTGTACCAGGAACCACCTCCTTAGCGTGTGTACTGGTATCCTGGTACGACAACGA	Chromosome	2	35	2167141	2167174	4.5e-10	Chromosome	35	58	1863691	1863714	3.5e-06
415197_1	GAGCTGTACCAGGAACCACCTCCTTATCCTGTGTACTGGTATCCTGGTACGACAACGA	Chromosome	2	35	2167141	2167174	4.5e-10	Chromosome	35	58	1863691	1863714	3.5e-06
415199_1	GAGCTGTACCAGGAACCACCTTCTTAGCCTGTGTACTGGTATCCTGGTACGACAACGA	Chromosome	2	35	2167141	2167174	4.5e-10	Chromosome	35	58	1863691	1863714	3.5e-06
415198_1	GAGCTGTACCAGGAACCACCTCTTTAGCCTGTGTACTGGTATCCTGGTACGACAACGA	Chromosome	2	35	2167141	2167174	4.5e-10	Chromosome	35	58	1863691	1863714	3.5e-06
415222_1	GAGCTGTACCAGGAAGCACCTCCTTAGCCTGTGTACTGGTATCCTGGTACGACAACGA	Chromosome	2	35	2167141	2167174	4.5e-10	Chromosome	35	58	1863691	1863714	3.5e-06
415825_1	GAGGACGTGAAGCATTCCCGGGCGACGTTTTCTGTCTGAAATTCCAGGATGTGGGTTCTTTCGACTACGGTCGTAACTACGGG	Chromosome	2	33	3919015	3918984	2.1e-10	Chromosome	34	82	2312451	2312403	7.5e-20
418995_1	GAGGTTGCACCCCAATTCTCTAACTGGCGAGTGACAATCAGGCTGATGCCAGTATTTCCCGCAGTG	Chromosome	2	38	2315645	2315609	1.2e-11	Chromosome	39	65	2916464	2916490	4.3e-06
419302_1	GAGTAAGCCGGTCATAAAACCGGTGGTTGTGATCTCAAATCACGGAGTAAGCCGGTCATAAAACCGGTGATTGTG	Chromosome	2	30	3946830	3946858	8.5e-09	Chromosome	35	74	228875	228914	3.1e-08
419683_1	GAGTATGAAATGTCCGGTTTGCCACCAGGGAGAAATTTTCCCTGGTGTTGGCGCAGTATTCGCGCACCCCGGTCC	Chromosome	4	36	3168247	3168215	5.1e-11	Chromosome	37	74	3350642	3350679	8.5e-14
419703_1	GAGTATTCGCGCACCCCGGTACTATTTTGACTTGGTTCGGCCTGGCATTATTTTGTATGGCA	Chromosome	2	20	3350660	3350678	0.0023	Chromosome	24	61	1239483	1239520	3e-12
419886_1	GAGTCAACTTCGGGTTGAGCAATAGTTGGGCCGATTGTGGCACCGCACACGCGGAATACTCAAG	Chromosome	2	21	2976364	2976345	0.00068	Chromosome	21	62	4439532	4439573	8.7e-13
421787_1	GAGTGTACCCGCGGCAAGACGGAAAGACCATGAATGATTTGATGTCATTTGGTATTCATCGTCTGTCGG	Chromosome	2	29	3424747	3424720	2.7e-08	Chromosome	29	66	4018968	4019005	3.5e-12
422118_1	GAGTTCAGTCGGTAGAACGGCGGTCTGTTTATCACGGAGTTCAGTCGGTAGAACGGCGGACTGTTAATCA	Chromosome	2	33	2062268	2062299	3.6e-07	Chromosome	38	69	2044557	2044588	1.7e-10
422171_1	GAGTTCGCAGGACGCGGGTGACGTAACGGTCGTCGGAGATCTTATTACCGTATTTTGGATGATAACGAGGCGTAACAAA	Chromosome	2	29	3640029	3640056	3.3e-08	Chromosome	30	79	1020102	1020053	4.3e-07
422278_1	GAGTTGACAGCAGGTTCAATCTGAACCTCAGTTCTGGCGCTAACAAAGTTGGTGTAATCAAAGCAGTACGTGACGCAACTGGG	Chromosome	2	33	3453432	3453401	2.1e-10	Chromosome	34	82	4180744	4180792	7.5e-15
422336_1	GAGTTGACTTGCCTGCATCACGTAGCTGACTTGCCTGCATCATGTC	Chromosome	9	28	3847580	3847599	0.0004	Chromosome	27	45	77517	77535	0.0014
422514_1	GAGTTGTACCAGGAACCACCTCCTTAGCCTGTGTACTGGTATCCTGGTACGACAACGA	Chromosome	5	35	2167144	2167174	4.5e-10	Chromosome	35	58	1863691	1863714	3.5e-06
424431_1	GATAACGTCGCAAGACCAAAGACACGGATAACGTCGCAAGACCAAAGAGGGGGGACCCTCGGGCCTCTTGCG	Chromosome	2	22	4166837	4166857	0.00023	Chromosome	25	71	3428587	3428542	2.9e-13
424435_1	GATAACGTCGCAAGACCAAAGAGGGGGGACACGGATAACGTCGCAAGACCAAAGAGGGGGGACCCTCGGGCCTCTTGCG	Chromosome	2	27	4166837	4166862	4.3e-07	Chromosome	32	78	3428587	3428542	3.3e-13
424436_1	GATAACGTCGCAAGACCAAAGAGGGGGGACCATCGGGCCTCCACGGATAACGTCGCAAGACCAAAGAGGGGGGACCATCGGGCCTCTTGCG	Chromosome	2	41	4166837	4166875	3.1e-09	Chromosome	44	90	3428587	3428542	1.8e-11
424912_1	GATAAGGCCGTTCGCTTTCTATTAATGAAAGCTCACCCAGATCGCTTTCTATTAATGAAAGCTCACCC	Chromosome	2	38	4168294	4168330	2.6e-13	Chromosome	42	68	2729512	2729486	9.6e-08
424913_1	GATAAGGCCGTTCGCTTTCTATTAATGAAAGGATAAGGCCGTTCGCTTTCTATTAATGAAAGCTAACCA	Chromosome	2	31	4168294	4168323	2.1e-09	Chromosome	30	68	2729525	2729487	4.5e-11
426330_1	GATACTGTCCCACGAATGGCCACCTGTTTGTCACGGATACTGTCCCACGAATGGCCACCTGTG	Chromosome	1	27	16623	16597	8.6e-08	Chromosome	29	62	609250	609217	5.1e-10
428400_1	GATATTTAAAGAAGAGCTCGTACGAAAGTACGGGCTTTTTTGGAAATTTAAAGAAAAGCTCGTACGAAAGTACGGGCTTTTTTTTAC	Chromosome	2	41	1097565	1097526	8e-15	Chromosome	46	85	1097020	1096981	3.7e-13
429858_1	GATCACAACAATAACAACAGACTGGCTGGCCCGGCAGCTCAATACACTGCAGCACAAAGGCGACGCACGTG	Chromosome	2	24	1463510	1463532	1.7e-05	Chromosome	25	70	2737393	2737438	1.3e-11
430484_1	GATCAGAACGTTAACTAAATAGAGGATCTCACGGCTCAGAACGTTCACTAAATAGATGG	Chromosome	2	25	3920921	3920898	3.6e-06	Chromosome	26	44	4389855	4389837	0.0022
432070_1	GATCCCGTCGGCTCCAGTTAGGGGAGCCGAAGGTTTATCACGGATCCCGTCGGCTCCAGTTAGGGGAGCCGAAGGGAGACCGC	Chromosome	44	61	3890435	3890452	0.013	Chromosome	61	82	3426169	3426148	0.0036
433118_1	GATCCTTCGCCTGTACCACGGGTTCATCCGTATGTCAATGGTTCGAGTCCAGTCAGAGGAGCCAG	Chromosome	2	23	1491488	1491467	0.0025	Chromosome	22	64	2058069	2058027	2.5e-13
[truncated: 70,306 more rows]
