# Supplementary material for: Hfq CLASH uncovers sRNA-target interaction networks linked to nutrient availability adaptation
Source: eLife. 2020 May 1;9:e54655. doi: 10.7554/eLife.54655 (PMC7213987; doi:10.7554/eLife.54655)
Supplement: Supplementary file 2. — Chimeric reads were subsequently analyzed using a statistical pipeline described by Waters et al., 2017. Only chimeric reads that had a Benjami-Hochberg adjusted p-value (bh_adj_p_value) of 0.05 or less were considered The last three columns indicate in which growth phases the interactions were identified. Min. MFE indicates the minimal folding energies of the chimera, which was calculated using RNADuplex from the ViennaRNA package (Lorenz et al., 2011). The two pairs in the intermolecular base-pairs and structure columns are separated by ‘ and ". [file elife-54655-supp2.xlsx]

## Sheet: Supplementary File 2
Supplementary File 2. Statistically filtered data
Chimeric reads were subsequently analyzed using a statistical pipeline described by [1]												References:
Only chimeric reads that had a Benjami-Hochberg adjusted p-value (bh_adj_p_value) of 0.05 or less were considered												[1] Waters, S. A. et al. Small RNA interactome of pathogenic E.~coli revealed through crosslinking of RNase E. EMBO J. e201694639 (2016).
The last three columns indicate in which growth phases the interactions were identified.												[2] Lorenz, R. et al. ViennaRNA Package 2.0. Algorithms Mol. Biol. (2011). doi:10.1186/1748-7188-6-26
Min. MFE indicates the minimal folding energies of the chimera, which was calculated using RNADuplex from the ViennaRNA package [2]
The two pairs in the intermolecular base-pairs and structure columns are separated by "&"
	First fragment in chimera							Second fragment in chimera							Statistics				RNADuplex results			Present in?
ID	rna_class	gene_id	gene_name	start	end	strand	sequence	rna_class	gene_id	gene_name	start	end	strand	sequence	p_value	bh_adj_p_value	total number of chimeras	Found in how many experiments?	Intermolecular base-pairs	Intermolecular stucture	ΔG (kcal/mol)	Exponential Phase	Transition Phase	Stationary Phase
100010_17	antisense_protein_coding	antisense-b1449	antisense-b1449	1519666	1519701	-	GTTTTCATAATAGATATCAATACCTTTTGGGCACG	ncRNA	b4444	omrA	2976140	2976189	-	CCCAGAGGTATTGATTGGTGAGATTATTCGGTACGCTCTTCGTACCCTG	8.56471e-160	2.08087e-159	1	1	TTTTCATAATAGATATCAATACCTTTTGGGC&CCCAGAGGTATTGATTGGTGAGAT	.((((((.......(((((((((.((((((.&)))))))))))))))..)))))).	-22.3	Yes	No	No
1000275_1	protein_coding	b0446	cof	467828	467891	+	CTCGGCAGCGTCACCAAGATCTGCTTCTGTGGCGATCACGACGATCTTACACGCTTGCAGATC	tRNA	b1984	asnW	2058027	2058082	-	AGAACGGCGGACTGTTAATCCGTATGTCACTGGTTCGAGTCCAGTCAGAGGAGCC	1.16011e-74	2.35761e-74	1	1	TGCTTCTGTGGCGATCACGACGATCTTACACGCTTGCAGATC&AATCCGTATGTCACTGGTTCGAGTCCAGTCAGAGGAGCC	.((((((.((((....((..(((.((.....((.(((.(((.&.))).))).))....)).))).))...)))).)))))).	-23.2	Yes	No	No
1000591_1	rRNA	b0201	rrsH	224769	224844	+	ACAGAACTTTCCAGAGATGGATTGGTGCCTTCGGGAACTGTGAGACAGGTGCTGCATGGCTGTCGTCAGCTCGTG	rRNA	b3278	rrsD	3428708	3428735	-	ATTGAACGCTGGCGGCAGGCCTAACAC	1.0971e-66	2.17249e-66	1	1	TGGCTGTCGTCAGCT&CGCTGGCGGCAGGCCT	.(((((((((((((.&.))))))))))).)).	-23.6	No	No	Yes
1000770_1	ncRNA	b4432	ryeA	1923066	1923127	+	AAGTCAGCGAAGGAAATGCTTCTGGCTTTTAACAGATAAAAAGAGACCGAACACGATTCCT	protein_coding	b4037	malM	4250465	4250532	+	AAGGGGTAATTACGCCCCACAGTGCTGATTTTGCAACAACTGGTGCGTCTCCTGGCGCACCTTTTTT	0	0	1	1	AGCGAAGGAAATGCTTCTGGCTTTTAACAGATAAAAAGAGACCGAACACGATTCCT&AAGGGGTAATTACGCCCCACAGTGCTGATTTTGCAACAACTGGTGCGTCTCCTGGCGCA	.(((.((((.((((..((((.......((((.....((..........((((((((&.)))))).....))..........))...))))......)))).)))).))))..))).	-19.2	No	No	Yes
1001086_1	tRNA	b1989	asnV	2062259	2062299	+	TCCTCTGTAGTTCAGTCGGTAGAACGGCGGACTGTTAATC	ncRNA	b4443	gcvB	2942766	2942811	+	GTTGTGTTGTTGTGTTTGCAATTGGTCTGCGATTCAGACCATGGT	0	0	2	1	CGGTAGAACGGCGGACTG&TGGTCTGCGATTCAGACCA	.(((.(((..(((((((.&.)))))))..)))..))).	-18	Yes	Yes	No
100155_17	protein_coding	b1961	dcm	2031705	2031725	-	CCTGCGATACCCAGGGCACG	protein_coding	b2174	lpxT	2269471	2269496	+	TTGCCCTGGGTGTTGCTGACGCCAT	5.90419e-09	8.48707e-09	5	1	TGCGATACCCAGGGCAC&TTGCCCTGGGTGTTGCT	.(((((((((((((((.&.))))))))))))))).	-30.9	Yes	No	No
1001584_1	ncRNA	b4704	arrS	3657988	3658052	-	AATCCGATTTAAATATCGAGTCTCCTTGTTTCGACTTAAGCTGGCAATTGGATTGCCAGCTTTC	rRNA	b3851	rrsA	4035859	4035924	+	CGGTCCAGACTCCTACGGGAGGCAGCAGTGGGGAATATTGCACAATGGGCGCAAGCCTGATGCAG	0	0	1	1	TCCGATTTAAATATCGAGTCTCCTTGTTTCGACTTAAGCTGGCAATTGGATTGC&CGGTCCAGACTCCTACGGGAGGCAGCAGTGGGGAATATTGCACAATGGGC	.((.(((..(((((....((((((((((....(((..(..((...((((((((.&))))))))...))..)..)))..))))).))))))))))....))).)).	-24.3	No	Yes	No
1001918_1	ncRNA	b4585	chiX	507216	507286	+	AAGTGACGGCATAATAATAAAAAAATGAAATTCCTCTTTGACGGGCCAATAGCGATATTGGCCATTTTTT	protein_coding	b2682	ygaZ	2810147	2810177	+	GGTTTTATGCTTCCGGCACTCTTTATGAGT	0	0	1	1	CCTCTTTGACGGGCCAATAGCGATATTGGCCA&GGTTTTATGCTTCCGGCACTCTTTATGAGT	.(((...((.(((((...(((.(((..((((.&)))).))))))...))).)).))...))).	-16.7	No	Yes	No
1001933_1	ncRNA	b4585	chiX	507215	507288	+	AAAGTGACGGCATAATAATAAAAAAATGAAATTCCTCTTTGACGGGCCAATAGCGATATTGGCCATTTTTTTA	3UTR	b3740	rsmG	3922938	3923004	-	CAGGTTTTCTACTGATATAACTGGTTACATTTAACGCCACGTTCACTCTTTTGCATCAACAAGATA	0	0	1	1	TGACGGGCCAATAGCGATATTGGC&ACTGATATAACTGGTTACATTTAACGCCACGTTC	.(((((((...(((..(((((((.&.)))))))..)))............))).)))).	-12.3	No	Yes	No
1001963_1	ncRNA	b4443	gcvB	2942840	2942901	+	CATTTACCCTGTCTGTCCATAGTGATTAATGTAGCACCGCCTAATTGCGGTGCTTTTTTTT	rRNA	b3275	rrlD	3425856	3425918	-	ACTGTTTCGGCAAGGGGGTCATCCCGACTTACCAACCCGATGCAAACTGCGAATACCGGAGA	0	0	1	1	CATTTACCCTGTCTGTCCATAGTGATTAATGTAGCACCGCCTAATTGCGGTGCT&TGTTTCGGCAAGGGGGTCATCCCGACTTACCAACCCGATGC	((((......((..(((....((((...........((.(((...(((.(.((.&.))..).)))))).))))))...)))..))......)))).	-15.4	Yes	No	No
1002466_1	ncRNA	b4408	csrB	2924181	2924254	-	AGGAAAAGTTGTCAAGGATGAGCAGGGAGCAACAAAAGTAGCTGGAATGCTGCGAAACGAACCGGGAGCGCTG	ncRNA	b4443	gcvB	2942756	2942821	+	CGGTTGTGATGTTGTGTTGTTGTGTTTGCAATTGGTCTGCGATTCAGACCATGGTAGCAAAGCTA	0	0	1	1	AGTTGTCAAGGATGAGCAGGGAGCAACAAAAGTAGCTGGAATGCTGCGAAACGAACCGG&CGGTTGTGATGTTGTGTTGTTGTGTTTGCAATTGGTCTGCGATTCAGACCATGGTAGCA	.(((((((.((.(((((..(((.(((........((.(.(((((.(((..((.(((((.&)))))))..))).))))).).))........))).)))..).))))..)).))))))).	-29.8	No	Yes	No
1002495_1	protein_coding	b1172	ymgG	1222806	1222823	-	GCTGGTGTTGGTGCAGT	ncRNA	b4450	arcZ	3350644	3350679	+	CCCTGGTGTTGGCGCAGTATTCGCGCACCCCGGTC	0.0016996	0.00204181	1	1	GCTGGTGTTGGTGCA&CGCACCCCGGTC	(((((....(((((.&.)))))))))).	-13.7	No	Yes	No
1002518_1	ncRNA	b4443	gcvB	2942696	2942719	+	CTTCCTGAGCCGGAACGAAAAGT	rRNA	b4009	rrlE	4211138	4211211	+	TAGCTCACTGGTCGAGTCGGCCTGCGCGGAAGATGTAACGGGGCTAAACCATGCACCGAAGCTGCGGCAGCGA	0	0	1	1	CTTCCTGAGCCGGAACGAAAAGT&CACTGGTCGAGTCGGCCTGCGCGGAAGA	(((((((.(((((..(((..(((&.)))..)))..)))))...)).))))).	-19.4	Yes	No	No
1002577_1	ncRNA	b1954	dsrA	2025270	2025311	-	CACATCAGATTTCCTGGTGTAACGAATTTTTTAAGTGCTTC	protein_coding	b2622	intA	2757331	2757352	+	CTCGTAAAAGCAGCAGATAGT	7.76135e-52	1.35824e-51	1	1	CCTGGTGTAACGAA&CTCGTAAAAGCAGCAGA	.(((.(((.((((.&.))))....))).))).	-9.9	No	Yes	No
1002648_1	protein_coding	b0146	sfsA	160901	160929	-	ACGGTTTTCACCCGCGCGCCACATCGAT	rRNA	b0201	rrsH	223841	223885	+	ACAGGAAGAAGCTTGCTTCTTTGCTGACGAGTGGCGGACGGGTG	2.92946e-13	4.41035e-13	1	1	TCACCCGCGCGCCACATCGA&ACGAGTGGCGGACGGGTG	.((((((..((((((.(((.&.)))))))))..))))))	-27.3	No	Yes	No
100355_1	protein_coding	b0435	bolA	454488	454521	+	GATAGAAGAAAAATTAAGGGCGGCGTTCCAACC	protein_coding	b3517	gadA	3667121	3667155	-	CAAGCGTATGGAAGCTGCAGGCAAACCAACGGAT	7.60016e-48	1.30738e-47	1	1	GGCGGCGTTCCAACC&CGTATGGAAGCTGCA	.(((((.(((((((.&.)).)))))))))).	-15	No	No	Yes
1003657_1	protein_coding	b3320	rplC	3452861	3452878	-	GAAGACGGCGTTTCTAT	ncRNA	b3864	spf	4049960	4049987	+	CTGAATATTTTAGCCGCCCCAGTCAGT	7.3282e-308	1.9832e-307	1	1	AGACGGCGTTTCTAT&TTAGCCGCCCCAGTCA	.(((((((...(((.&.))).))))...))).	-9.3	No	Yes	No
100446_12	protein_coding	b2295	yfbV	2412859	2412889	-	TTACCCATGCAGGGATTGTGGTGGCTGGGC	3UTR	b4484	cpxP	4106331	4106370	+	TTCCTTGCCATAGACACCATCCCTGTCTTCCCCCACATG	6.64827e-38	1.17401e-37	3	1	TGCAGGGATTGTGGTGGCTGGGC&TCCTTGCCATAGACACCATCCCTGTC	.((((((((.((((((((.(((.&.))).)))))...))).)))))))).	-27.1	No	Yes	No
1005145_1	5UTR	b1243	oppA	1301023	1301069	+	GATCGTCTGAATCACCAGAATAAATAAAGTCGGTGATAGTAATACG	protein_coding	b3710	mdtL	3892048	3892075	+	GCTCGGACATCTGATTATGCTTAAATT	2.76438e-09	3.65091e-09	1	1	GATCGTCTGAA&CTCGGACATCT	(((.((((((.&.))))))))).	-9.9	No	Yes	No
1005277_1	rRNA	b2589	rrlG	2728356	2728380	-	GCTGGTTCTCCCCGAAAGCTATTT	5UTR	b4173	hflX	4400613	4400639	+	TTACACGGGGAGCCAGCGATCCTGCG	0.00873284	0.0101883	1	1	GCTGGTTCTCCCCGA&ACGGGGAGCCAGCG	(((((..(((((((.&.)))))))))))).	-23.6	No	Yes	No
1005575_1	protein_coding	b0904	focA	954393	954414	-	TGGCCGAAGAGGCGGGTGTCT	ncRNA	b4452	gadY	3664893	3664927	+	GGGAGTGTTATAACGGTTTATTAGTCTGGAGACG	8.36672e-25	1.27243e-24	1	1	TGGCCGAAGAGGCGGGTGTCT&GGGAGTGTTATAACGGTTT	.(((((....((((..(.((.&)).).))))....))))).	-6.8	No	Yes	No
1005794_1	rRNA	b0204	rrlH	227081	227103	+	GTTAATCGGGGCAGGGTGAGTC	ncRNA	b4443	gcvB	2942842	2942881	+	TTTACCCTGTCTGTCCATAGTGATTAATGTAGCACCGCC	0	0	1	1	GTTAATCGGGGCAGGGTGAGT&TTTACCCTGTCTGTCCATAGTGATTAATG	((((((((((((((((((((.&))))))))))))........)))))))).	-21.9	No	No	Yes
100613_21	5UTR	b0880	cspD	922633	922655	-	AGCCCCCTCTCTGACCCCGGTT	protein_coding	b1051	msyB	1113854	1113894	-	TGAATGGGACGAGGGGGAATTTCAGCTTGAGCCACCGCTG	5.50802e-120	1.26183e-119	6	1	GCCCCCTCTCTGAC&ATGGGACGAGGGGGA	.((((((((((.(.&.).))).))))))).	-18.5	No	No	Yes
1006374_1	ncRNA	b4443	gcvB	2942719	2942767	+	TTTATCGGAATGCGTGTTCTGGTGAACTTTTGGCTTACGGTTGTGATG	protein_coding	b3987	rpoB	4185042	4185072	+	GGTCAGCGTTTCGGGGAGATGGAAGTGTGG	3.28187e-65	5.98517e-65	1	1	TCGGAATGCGTGTTCTGGTGAACTTTTGGCTT&GGTCAGCGTTTCGGGGAGATGGAAGTGTGG	.((.(...(((.((((.(.((((..((((((.&)))))).))))).)))).)))....).)).	-15.2	No	Yes	No
100653_10	inter	int-3891-1	int-3891-1	3269645	3269675	+	TTTATTCATCTTACCCTGTGCACCAAAAGC	ncRNA	b3864	spf	4049899	4049966	+	TAGGGTACAGAGGTAAGATGTTCTATCTTTCAGACCTTTTACTTCACGTAATCGGATTTGGCTGAAT	2.05251e-07	2.88449e-07	7	1	TCATCTTACCCTGTGCACCA&AGGGTACAGAGGTAAGATGT	.(((((((((((((((.((.&.)))))))).))))))))).	-25.7	Yes	No	No
1006588_1	ncRNA	b4704	arrS	3657984	3658054	-	GTAATCCGATTTAAATATCGAGTCTCCTTGTTTCGACTTAAGCTGGCAATTGGATTGCCAGCTTTCTTTT	3UTR	b4207	fklB	4429806	4429857	+	GACTGACTAAAGGCCGTAGAGCCTGAACAACACAGACAGGTACAGGAAGAA	0	0	1	1	ATCCGATTTAAATATCGAGTCTCCTTGTTTCGACTTAAGCTGGCAATTGGA&ACTAAAGGCCGTAGAGCCTGAACAACACAGACAGGTACAGGAA	.(((........((((..((((..((((((.(.(((..((.(((..((((.&.))))..))))).))).).))))))...)))).))))..))).	-19.8	Yes	No	No
100682_23	antisense_protein_coding	antisense-b1345	antisense-b1345	1412303	1412327	+	TTTTCGGTTCTGCCGTACTCCCGA	ncRNA	b4452	gadY	3664918	3664950	+	CTGGAGACGGCAGACTATCCTCTTCCCGGTCC	4.58115e-26	7.5931e-26	5	1	TTCGGTTCTGCCGTACTCCC&TGGAGACGGCAGACTATCCTCTTCCCGGT	.((((.((((((((.((((.&.))))))))))))...........)))).	-21.9	No	No	Yes
1006932_1	protein_coding	b3247	rng	3396886	3396916	-	ATCGACCAGACCGAAGCGATGACCACCGTG	3UTR	b4484	cpxP	4106329	4106371	+	TTTTCCTTGCCATAGACACCATCCCTGTCTTCCCCCACATGC	1.90768e-56	3.37744e-56	1	1	CAGACCGAAGCGATGA&CCATCCCTGTCTT	.((((...((.((((.&.)))).)))))).	-7.7	No	Yes	No
1007086_1	antisense_protein_coding	antisense-b0932	antisense-b0932	992562	992579	-	GCCAGTTCAGTCGCCAG	tRNA	b1989	asnV	2062268	2062335	+	GTTCAGTCGGTAGAACGGCGGACTGTTAATCCGTATGTCACTGGTTCGAGTCCAGTCAGAGGAGCCA	0	0	1	1	GCCAGTTCAGTCGCCA&CGGCGGACTGTTAATCCGTATGTCACTGGTT	((((((.((((((((.&.)))).))))..............)))))).	-16.7	No	Yes	No
1007232_1	rRNA	b3275	rrlD	3425864	3425923	-	AGAGCACTGTTTCGGCAAGGGGGTCATCCCGACTTACCAACCCGATGCAAACTGCGAAT	protein_coding	b4173	hflX	4401831	4401897	+	GGCAATAGAAAAAGAGTGGATGGAGGAGGACGGCAGCGTAAGTCTGCAAGTTCGTATGCCGATCGT	1.52662e-15	2.34973e-15	1	1	TTCGGCAAGGGGGTCATCCCGACTTACCAACCCGATGCAAACTGCG&TGGAGGAGGACGGCAGCGTAAGTCTGCAAGTTCGTATGCCGAT	.((((((.(.(((.(...(.(((((((....(((.(.(...((.(.&.).))..).))))....))))))).)...)))).).)))))).	-25.4	Yes	No	No
1007319_1	ncRNA	b4443	gcvB	2942813	2942833	+	CAAAGCTACCTTTTTTCACT	rRNA	b3758	rrlC	3944564	3944619	+	GAGCACTGTTTCGGCAAGGGGGTCATCCCGACTTACCAACCCGATGCAAACTGCG	0	0	1	1	TACCTTTTTTCA&CGGCAAGGGGGTC	.((((((((((.&.)).)))))))).	-6.5	Yes	No	No
1007394_1	rRNA	b3274	rrfD	3423669	3423728	-	CGCCGTAGCGCCGATGGTAGTGTGGGGTCTCCCCATGCGAGAGTAGGGAACTGCCAGGC	protein_coding	b4016	aceK	4218944	4218970	+	CTCCCGAGCGGCTTTTTATCTTTAGC	0	0	1	1	TGCGAGAGTAGGGAACTGCCAGGC&CCCGAGCGGCTTTTTATCTTTAGC	.((.((((((((((.((((..((.&.))..)))).)))))).)))).))	-14.2	No	Yes	No
1007787_1	ncRNA	b4445	omrB	2976358	2976382	-	AGAGGTATTGATAGGTGAAGTCAA	antisense_protein_coding	antisense-b3585	antisense-b3585	3752723	3752740	-	AACACAATCCCCAGGTG	0	0	1	1	AGAGGTATTGA&ACAATCCCCA	.(.((.((((.&.)))))).).	-4.2	Yes	No	No
1007905_1	ncRNA	b4585	chiX	507229	507284	+	ATAATAAAAAAATGAAATTCCTCTTTGACGGGCCAATAGCGATATTGGCCATTTT	rRNA	b3758	rrlC	3944564	3944634	+	GAGCACTGTTTCGGCAAGGGGGTCATCCCGACTTACCAACCCGATGCAAACTGCGAATACCGGAGAATGT	0	0	2	1	AATTCCTCTTTGACGGGCCAATAGCGATATTGGCCA&GGGTCATCCCGACTTACCAACCCGATGCAAACTGCGAATA	.(((((..((((.((((.....((((....(((((.&.)))))...)).))......))))...))))..).)))).	-18.7	Yes	Yes	Yes
1007939_1	rRNA	b3970	rrlB	4169548	4169580	+	AAACTGCGAATACCGGAGAATGTTATCACGGG	tRNA	b3976	thrU	4175405	4175434	+	GTAGAGCAACTGACTTGTAATCAGTAGGT	0	0	1	1	ACTGCGAATACCGGAGAATGTTATCACG&GTAGAGCAACTGACTTGTAATCAGTAGG	.((((((.(((..(((...(((.((((.&)).))..)))...)))))).)).)))).	-9.5	No	No	Yes
1007967_1	ncRNA	b1954	dsrA	2025250	2025284	-	TTTTTAAGTGCTTCTTGCTTAAGCAAGTTTCATC	ncRNA	b4439	micF	2313119	2313178	+	TTTCTGAATGTCTGTTTACCCCTATTTCAACCGGATGCCTCGCATTCGGTTTTTTTTAC	0	0	1	1	AAGTGCTTCTTGCTTAAGCAAGTTTCAT&CTGAATGTCTGTTTACCCCTATTTCAACCGGATGCCTC	.((.((.(((....((((((...((((.&.))))....))))))..............))).)))).	-6.9	No	No	Yes
1008319_1	ncRNA	b4704	arrS	3657983	3658054	-	GTAATCCGATTTAAATATCGAGTCTCCTTGTTTCGACTTAAGCTGGCAATTGGATTGCCAGCTTTCTTTTA	protein_coding	b4261	lptF	4486271	4486303	+	CTCTTCATCTTGCTTTTGATCTTCTTCTGTCA	2.54178e-69	5.08153e-69	1	1	CTGGCAATTGGATTGCCAGCT&TGCTTTTGATCTTCTTCTGTCA	.(((((...((((((..(((.&.)))..)))))).....)))))	-9.6	No	Yes	No
1008348_1	protein_coding	b1136	icd	1196367	1196406	+	ATGTAATGCCGTAGTTTGTTAAATTTATTAACGGGAGCG	protein_coding	b3210	arcB	3350690	3350754	-	AAAGAAGAGTGGCGTCACGACGTAGAAGTGCTGAAAGCGTGGGTGGCAAAAGCCACTAAAAAAT	7.11015e-244	1.92018e-243	1	1	ATGTAATGCCGTAGTTTGTTAAATTTATTAACGGGAGCG&GGCGTCACGACGTAGAAGTGCTGAAAGCGTGGGTGGCAA	.(((...(((...((((.....((((.....((((.((.&.)).)).))......)))).....))))...))).))).	-13.4	No	No	Yes
100837_21	inter	int-2931-1	int-2931-1	1520142	1520209	+	TTGTTCTGCTGCTAATAACAACAAAGGTGAGTGGTTTATGATTATTCACTTTAATACACCAGGTGAA	ncRNA	b4450	arcZ	3350642	3350665	+	TTCCCTGGTGTTGGCGCAGTATT	3.3152e-299	9.51821e-299	3	1	CTGCTGCTAATAACAACAAAGGTGAGTGGTTTATGATTATTCACTTTAATACACCAGGTGAA&TTCCCTGGTGTTGGCGCAGTAT	.((((((..................((.(.....................((((((((.((.&.))))))))))).)))))))).	-18	No	No	Yes
100840_20	antisense_protein_coding	antisense-b2288	antisense-b2288	2404866	2404893	+	TAAAACTTGGCGGACAGGCGTAAGCGG	ncRNA	b4443	gcvB	2942843	2942883	+	TTACCCTGTCTGTCCATAGTGATTAATGTAGCACCGCCTA	4.14899e-07	5.79639e-07	5	1	AACTTGGCGGACAGGCGTAAG&TTACCCTGTCTGTCCATAGTG	.((((((((((((((.((((.&)))))))))))).))).))).	-22.7	No	Yes	No
1008428_1	protein_coding	b1182	hlyE	1229552	1229572	-	AAAGAAGCGGCCAAAAAAAT	protein_coding	b1250	kch	1309008	1309036	-	AAAGAATCGGCGCAAAAATAGAGTTTAA	0	0	1	1	AGCGGCCA&CGGCGCA	.((.(((.&.))))).	-7.6	No	No	Yes
100849_10	protein_coding	b1993	cobU	2065232	2065263	-	GAAGTATGGCTGGTGGTTTCGGGTATTGGAG	protein_coding	b4382	deoA	4618766	4618788	+	TCCCGCTGATCACCGCCTCTAT	0.0104218	0.0128034	5	1	TGGCTGGTGGTTTCGGGT&TCCCGCTGATCACCGCCT	.(((.(((((((.((((.&.))))..)))))))))).	-21.7	Yes	No	No
1008578_1	protein_coding	b1212	prmC	1266267	1266289	+	CTGACACGTCGTCGCGATGGTG	inter	int-1067-1	int-1067-1	2035637	2035674	+	TGCGACGACGTTGCTCAATAAGGAAAATTTGGCGTGA	0.0281909	0.033615	2	1	CTGACACGTCGTCGCGA&TGCGACGACGTTGCTCAA	.(((((((((((((((.&))))))))))).).))).	-21.3	No	Yes	No
100900_2	inter	int-4260-1	int-4260-1	3941692	3941748	+	TGTGGGCACTCGAAGATACGGATTCTTAACGTCGCAAGACGAAAAATGAATACCAA	rRNA	b3968	rrsB	4168192	4168234	+	CCTCCTTACCTTAAAGAAGCGTACTTTGTAGTGCTCACACAG	6.29059e-102	1.29179e-101	38	1	TGTGGGCACTCGAAGATACGGATTCTTA&AAAGAAGCGTACTTTGTAGTGCTCACAC	(((((((((((((((.((((..(((((.&.))))).))))))))).)))))))))).	-29.2	Yes	Yes	Yes
100908_2,1529323_1	inter	int-2044-1	int-2044-1	4208031	4208074	+	TGTGGGCACTCGAAGATACGGATTCTTAACGTCGCAAGACGAA	rRNA	b4007	rrsE	4209672	4209723	+	TTGGATCACCTCCTTACCTTAAAGAAGCGTTCTTTGCAGTGCTCACACAGA	4.32163e-87	8.49471e-87	30	2	TGTGGGCACTCGAAGATACGGATTCTTA&AAAGAAGCGTTCTTTGCAGTGCTCACAC	((((((((((((((((.(((..(((((.&.))))).))))))))).)))))))))).	-29	Yes	Yes	No
100910_2,1319355_1	rRNA	b3756	rrsC	3943333	3943383	+	TTGGATCACCTCCTTACCTTAAAGAAGCGTTCTTTGCAGTGCTCACACAG	3UTR	b3850	hemG	4035415	4035462	+	TGTGGGCACTCGAAGATACGGATTCTTAACGTCGCAAGACGAAAAAT	6.95084e-80	1.33342e-79	31	2	AAAGAAGCGTTCTTTGCAGTGCTCACAC&TGTGGGCACTCGAAGATACGGATTCTTA	.(((((.(((((((((.((((((((((.&)))))))))))))))).)))..))))).	-29	Yes	Yes	No
100911_2,1990057_1	3UTR	b3967	murI	4166543	4166586	+	TGTGGGCACTCGAAGATACGGATTCTTAACGTCGCAAGACGAA	rRNA	b4007	rrsE	4209678	4209723	+	CACCTCCTTACCTTAAAGAAGCGTTCTTTGCAGTGCTCACACAGA	3.04469e-84	5.9347e-84	25	2	TGTGGGCACTCGAAGATACGGATTCTTA&AAAGAAGCGTTCTTTGCAGTGCTCACAC	((((((((((((((((.(((..(((((.&.))))).))))))))).)))))))))).	-29	Yes	Yes	Yes
100912_2	rRNA	b2591	rrsG	2729582	2729625	-	CACCTCCTTACCTTAAAGAAGCGTACTTTGCAGTGCTCACACA	3UTR	b3850	hemG	4035415	4035471	+	TGTGGGCACTCGAAGATACGGATTCTTAACGTCGCAAGACGAAAAATGAATACCAA	4.18579e-127	9.16701e-127	27	1	AAAGAAGCGTACTTTGCAGTGCTCACAC&TGTGGGCACTCGAAGATACGGATTCTTA	.(((((.(((((((((.((((((((((.&))))))))))))))).))))..))))).	-29.2	Yes	Yes	No
100914_2,509054_1	rRNA	b2591	rrsG	2729582	2729625	-	CACCTCCTTACCTTAAAGAAGCGTACTTTGCAGTGCTCACACA	3UTR	b3967	murI	4166543	4166599	+	TGTGGGCACTCGAAGATACGGATTCTTAACGTCGCAAGACGAAAAATGAATACCAA	7.21141e-127	1.57818e-126	22	2	AAAGAAGCGTACTTTGCAGTGCTCACAC&TGTGGGCACTCGAAGATACGGATTCTTA	.(((((.(((((((((.((((((((((.&))))))))))))))).))))..))))).	-29.2	Yes	Yes	No
100979_3	rRNA	b3274	rrfD	3423753	3423791	-	AATTTGCCTGGCGGCCGTAGCGCGGTGGTCCCACCTGA	rRNA	b3759	rrfC	3946772	3946820	+	TGGTAGTGTGGGGTCTCCCCATGCGAGAGTAGGGAACTGCCAGGCATC	2.20117e-76	4.16984e-76	1	1	TTGCCTGGCGGCCGTAGCGCGGTGGTCCCACCTGA&GTAGTGTGGGGTCTCCCCATGCGAGAGTAGGGAACTGCCAGGCAT	.((((((((((((.(((((.((.(((((((((((.&.))).))))))...)))).))).....)).))..)))))))))).	-40.1	Yes	Yes	No
1009920_1	5UTR	b3298	rpsM	3442555	3442604	-	TTTTCTTGCAAAGTTGGGTTGAGCTGGCTAGATTAGCCAGCCAATCTTT	ncRNA	b3864	spf	4049945	4049988	+	CGTAATCGGATTTGGCTGAATATTTTAGCCGCCCCAGTCAGTA	0	0	1	1	AGTTGGGTTGAGCTGGCTAGATTAGCCAGCCAATCTT&CGGATTTGGCTGAATATTTTAGCCGCCCCAGTCA	.((((((....((.(((((((.((..((((((((((.&.))))).)))))..)).)))))))))))))).).	-31.1	No	No	Yes
1010072_1	3UTR	b0729	sucD	765052	765084	+	TCTGTAATAAGAAATAGCCCTCGCCGCTTCCC	rRNA	b2591	rrsG	2729966	2729988	-	AACTGGAGGAAGGTGGGGATGA	4.27417e-257	1.16646e-256	1	1	CCCTCGCCGCTTCCC&TGGAGGAAGGTGGGGA	.(((((((.(((((.&.)))))..))))))).	-19	No	Yes	No
1010120_1	5UTR	b0681	chiP	708242	708301	+	GCGAGACTTTTCTCAACGCTACTTTTTTAATTTTTATTTTTTCGCTGTTCACCTTTGGT	ncRNA	b4704	arrS	3657987	3658050	-	TCCGATTTAAATATCGAGTCTCCTTGTTTCGACTTAAGCTGGCAATTGGATTGCCAGCTTTCT	0	0	1	1	GCGAGACTTTTCTCAACGCTACTTTTTTAATTTTTATTTTTTCGCTGTTCACCTTTGGT&TCCGATTTAAATATCGAGTCTCCTTGTTTCGACTTAAGCTGGCAATTGGATTGCC	((((..(..((.(((..(((........(((.........((((.((((.....((((.&.))))....)))).)))).......)))........)))))).))..)..)))).	-13.1	Yes	No	No
101024_23	protein_coding	b1747	astA	1829930	1830014	-	ACATCTTTGACGGTGGGCCGACGCTTGAGTGTGACATCGACCGCGTGCGCGCCATCCGTAAAAGTCGGCTGGTGGAAGTGGCAG	3UTR	b4484	cpxP	4106330	4106369	+	TTTCCTTGCCATAGACACCATCCCTGTCTTCCCCCACAT	1.67765e-19	2.66132e-19	4	1	GGTGGGCCGACGCTTGAGTGTGACATCGACCGCGTGCGCGCCATCCGTAAAAGTCGGCTGGTGGAAGTGGCAG&TTGCCATAGACACCATCCCTGTCTTCCCCCACA	.(((((...............((((..............................((.(((((...((((((.&.))))))...)))))..))))))....))))).	-23.8	No	No	Yes
1010285_1	antisense_protein_coding	antisense-b1084	antisense-b1084	1141492	1141516	+	CTTCAATATCTGCCGTCTCTTCCT	ncRNA	b4452	gadY	3664903	3664953	+	TAACGGTTTATTAGTCTGGAGACGGCAGACTATCCTCTTCCCGGTCCCCT	0	0	3	1	ATCTGCCGTCTCTT&TGGAGACGGCAGAC	.((((((((((((.&.)))))))))))).	-22.9	No	Yes	No
1010981_1	ncRNA	b4424	rdlC	1270403	1270458	+	AGATTAGCCCCCGTTTTGTTGTCAGGTTTTACCTCTCAACGTGCGGGGGTTTTCT	rRNA	b3275	rrlD	3425853	3425918	-	ACTGTTTCGGCAAGGGGGTCATCCCGACTTACCAACCCGATGCAAACTGCGAATACCGGAGAATG	1.03376e-224	2.74341e-224	1	1	AGCCCCCGTTTTGTTGTCAGGTTTTACCTCTCAACGTGCGGG&ACTGTTTCGGCAAGGGGGTCATCCCGACTTACCAACCCGATGCA	.((...((..(((..(((.((.....(((((...((.((((.&.))))..))...))))).....)).)))....)))..))..)).	-20.9	No	Yes	No
1011013_1	rRNA	b0204	rrlH	226624	226689	+	CTGTTTCGGCAAGGGGGTCATCCCGACTTACCAACCCGATGCAAACTGCGAATACCGGAGAATGT	ncRNA	b4432	ryeA	1923102	1923154	+	TAAAAAGAGACCGAACACGATTCCTGTATTCGGTCCAGGGAAATGGCTCTTG	0	0	2	1	AGGGGGTCATCCCGACTTACCAACCCGATGCAAACTGCGAATACCGGAGAATGT&AACACGATTCCTGTATTCGGTCCAGGGAAATGGCTCTTG	.(((((((((((((((.....................(((((((.((((..(((&.)))...)))).))))))))))..))))..)))))))).	-25.7	No	Yes	No
1011015_1	inter	int-653-1	int-653-1	1216680	1216715	+	TTTTTGTCTGTCGCTTTAGACTATACACAGCATAA	3UTR	b1874	cutC	1958441	1958514	-	ACCGTTGCATCATGTCGCCCAATATGATGCTTGCTCGTACCAGGCCCCTGCAATTTCAACAGGGGCCTTTTTT	0	0	1	1	TTTGTCTGTCGCTTTAGACTATACACAGCATA&GATGCTTGCTCGTACCAGGCCCCTGCAAT	.((((..(..((((...((....((.(((((.&.)))))))...))...))))..).)))).	-9.7	No	No	Yes
1011132_1	protein_coding	b1607	ydgC	1681891	1681954	-	ATTATATCGCCGGGCTGATTCCACTTTTCCCGACCTTTGCGCTTATCGCGCATTATATTGTTG	rRNA	b3970	rrlB	4169738	4169770	+	GCTCACTGGTCGAGTCGGCCTGCGCGGAAGAT	8.68443e-46	1.60257e-45	2	1	TCGCCGGGCTGATTCCACTTTTCCCGACCTTTGCGCT&GCTCACTGGTCGAGTCGGCCTGCGCGG	.((((((((((((((..........((((..((.((.&)).))..))))))))))))))).))).	-31.9	Yes	No	No
1011134_1	protein_coding	b1607	ydgC	1681893	1681954	-	ATTATATCGCCGGGCTGATTCCACTTTTCCCGACCTTTGCGCTTATCGCGCATTATATTGT	rRNA	b3854	rrlA	4038616	4038648	+	GCTCACTGGTCGAGTCGGCCTGCGCGGAAGAT	1.52152e-41	2.74693e-41	1	1	TCGCCGGGCTGATTCCACTTTTCCCGACCTTTGCGCT&GCTCACTGGTCGAGTCGGCCTGCGCGG	.((((((((((((((..........((((..((.((.&)).))..))))))))))))))).))).	-31.9	Yes	No	No
1011218_1	protein_coding	b0118	acnB	134132	134197	+	CTTACCGTTATCTGAACTTCAACCAGCTTTCTCAGTACACCGAGAAAGCCGATGGGGTGATTTTC	protein_coding	b3894	fdoG	4085816	4085840	-	CGAAACAAGGAGCAATCCATGCAG	2.01119e-190	5.1166e-190	1	1	AGCCGATGGGGTGATTTTC&AAGGAGCAATCCATGCA	.((..(((((.((.((((.&.)))).)).))))))).	-7.1	No	Yes	No
1011592_1	ncRNA	b4443	gcvB	2942715	2942755	+	AAGTTTTATCGGAATGCGTGTTCTGGTGAACTTTTGGCTT	rRNA	b3854	rrlA	4039699	4039735	+	TTAATGTTTGATGTTCTAACGTTGACCCGTAATCCG	0	0	1	1	TCGGAATGCGTGTTCTGGTGAACTTTTGGCT&TGTTTGATGTTCTAACGTTGACCCGTAATCCG	.((((.((((.(((...((((((.((.(((.&.))).)).))))..))...))).)))).))))	-16.5	No	Yes	No
1011640_1	inter	int-1075-1	int-1075-1	2044707	2044733	+	CTTAAGCGCCCTCGACCTTTATGGTT	rRNA	b4007	rrsE	4209587	4209610	+	GCTTAACCTTCGGGAGGGCGCTT	4.10213e-77	8.39097e-77	1	1	TAAGCGCCCTCGACCTTTATGGTT&TAACCTTCGGGAGGGCGCTT	.((((((((((..((.....((((&.))))...))))))))))))	-22.6	Yes	No	No
1011752_1	tRNA	b0665	glnV	696544	696616	-	TGGGGTATCGCCAAGCGGTAAGGCACCGGATTCTGATTCCGGCATTCCGAGGTTCGAATCCTCGTACCCCAG	ncRNA	b4443	gcvB	2942696	2942719	+	CTTCCTGAGCCGGAACGAAAAGT	0	0	1	1	ATTCTGATTCCGGCATTCCGAGGT&CTTCCTGAGCCGGAACGAAA	.(((.(.(((((((.((..((((.&))))..))))))))))))).	-15.3	No	Yes	No
1012109_1,604221_1	ncRNA	b4585	chiX	507216	507288	+	AAGTGACGGCATAATAATAAAAAAATGAAATTCCTCTTTGACGGGCCAATAGCGATATTGGCCATTTTTTTA	ncRNA	b4443	gcvB	2942695	2942771	+	ACTTCCTGAGCCGGAACGAAAAGTTTTATCGGAATGCGTGTTCTGGTGAACTTTTGGCTTACGGTTGTGATGTTGT	0	0	2	2	GACGGCATAATAATAAAAAAATGAAATTCCTCTTTGACGGGCCAATAGCGATATTGGCCAT&CTGAGCCGGAACGAAAAGTTTTATCGGAATGCGTGTTCTGGTGAACTTTTGGCTTACGGTTGTGATGTTGT	.(((((((.(((((.......((((((((..((..((((.((..((..((((((((((((.&.)).)))))............)))))..)))).))))..)).))).))))).......))))).)))))))	-25.7	Yes	Yes	Yes
1012190_1	inter	int-653-1	int-653-1	1216680	1216716	+	TTTTTGTCTGTCGCTTTAGACTATACACAGCATAAT	ncRNA	b4443	gcvB	2942713	2942835	+	AAAAGTTTTATCGGAATGCGTGTTCTGGTGAACTTTTGGCTTACGGTTGTGATGTTGTGTTGTTGTGTTTGCAATTGGTCTGCGATTCAGACCATGGTAGCAAAGCTACCTTTTTTCACTTC	0	0	3	1	TGTCTGTCGCTTTAGACTATACACAGCATAAT&TGTTGTGTTGTTGTGTTTGCAATTGGTCTGCGATTCAGACC	.(((((((((...(((((((((((((((((((&.)))))))))).))))........)))))))))..))))).	-26.6	No	No	Yes
1012300_1	rRNA	b0204	rrlH	225921	225957	+	CATAGGTTAATGAGGCGAACCGGGGGAACTGAAACA	5UTR	b0987	gfcA	1050646	1050677	-	AACAATCTTATATTTCCCTCTGCGCGCCTTT	1.76345e-18	2.77283e-18	1	1	TGAGGCGAACCGGGGGAAC&TTTCCCTCTGCGCGCCTTT	.((((((..(.(((((((.&.))))))).)..)))))).	-21.7	No	Yes	No
1012301_1	5UTR	b0987	gfcA	1050643	1050677	-	AACAATCTTATATTTCCCTCTGCGCGCCTTTCCT	rRNA	b3758	rrlC	3943867	3943902	+	ATAGGTTAATGAGGCGAACCGGGGGAACTGAAACA	4.24613e-16	6.57056e-16	1	1	TTTCCCTCTGCGCGCCTTT&TGAGGCGAACCGGGGGAAC	.(((((((.(..((((((.&.))))))..).))))))).	-21.7	No	Yes	No
1012302_1	5UTR	b0987	gfcA	1050646	1050677	-	AACAATCTTATATTTCCCTCTGCGCGCCTTT	rRNA	b4009	rrlE	4210205	4210241	+	CATAGGTTAATGAGGCGAACCGGGGGAACTGAAACA	1.8536e-17	2.89697e-17	1	1	TTTCCCTCTGCGCGCCTTT&TGAGGCGAACCGGGGGAAC	.(((((((.(..((((((.&.))))))..).))))))).	-21.7	No	Yes	No
1012305_1	rRNA	b0204	rrlH	225921	225957	+	CATAGGTTAATGAGGCGAACCGGGGGAACTGAAACA	rRNA	b3851	rrsA	4036129	4036149	+	AGATGTGAAATCCCCGGGCT	3.69871e-36	6.48267e-36	1	1	AGGCGAACCGGGGG&TCCCCGGGCT	.(((...((((((.&.)))))))))	-15.1	No	Yes	No
1012908_1	antisense_protein_coding	antisense-b2509	antisense-b2509	2634630	2634689	-	AGCGCAGCACCGGTTTTTGAGGTGATCACACCAACGCAATGCGCAGGGGAGGGAAGTGG	protein_coding	b4161	rsgA	4390565	4390616	-	ATATCGCGATTGCAAACACGATACCGATCCGGGCTGCGCTATCCGGGAAGC	0.0182015	0.0219724	1	1	AGCGCAGCACCGGTTTTTGAGGTGATCACACCAACGCAATGCGCA&CGCGATTGCAAACACGATACCGATCCGGGCTGCGCTA	((((((((.((((.......(((.(((........(((((.(((.&.))))))))......))))))...)))))))))))).	-36	No	Yes	No
1013096_1	protein_coding	b0180	fabZ	202136	202184	+	ATTTTAGAACTTCTGCCGCACCGTTTCCCGTTCTTACTGGTGGATCGC	rRNA	b0204	rrlH	226765	226803	+	AAAGTCATGGTTAAGTGGGAAACGATGTGGGAAGGCCC	1.43801e-196	3.68714e-196	1	1	AGAACTTCTGCCGCACCGTTTCCCGTTCTTACTGGTGGA&GTCATGGTTAAGTGGGAAACGATGTGGGAAGGCCC	.(..((((..(((((.(((((((((..((((.(.((((.&.)))).).))))))))))))).)))))))))..).	-30.3	No	No	Yes
1013097_1	protein_coding	b0180	fabZ	202136	202184	+	ATTTTAGAACTTCTGCCGCACCGTTTCCCGTTCTTACTGGTGGATCGC	rRNA	b2589	rrlG	2728140	2728178	-	CAAAGTCATGGTTAAGTGGGAAACGATGTGGGAAGGCC	1.05425e-207	2.73871e-207	1	1	ACTTCTGCCGCACCGTTTCCCGTTCTTACTGGTGGA&GTCATGGTTAAGTGGGAAACGATGTGGGAAGG	.((((..(((((.(((((((((..((((.(.((((.&.)))).).))))))))))))).))))))))).	-30.1	No	No	Yes
1013098_1	protein_coding	b0180	fabZ	202136	202184	+	ATTTTAGAACTTCTGCCGCACCGTTTCCCGTTCTTACTGGTGGATCGC	rRNA	b3970	rrlB	4169647	4169685	+	AAAGTCATGGTTAAGTGGGAAACGATGTGGGAAGGCCC	4.0143e-190	1.01988e-189	1	1	AGAACTTCTGCCGCACCGTTTCCCGTTCTTACTGGTGGA&GTCATGGTTAAGTGGGAAACGATGTGGGAAGGCCC	.(..((((..(((((.(((((((((..((((.(.((((.&.)))).).))))))))))))).)))))))))..).	-30.3	No	No	Yes
1013243_1	antisense_protein_coding	antisense-b0209	antisense-b0209	231816	231834	-	TTCAGACCACGGTAGAAA	ncRNA	b4443	gcvB	2942696	2942761	+	CTTCCTGAGCCGGAACGAAAAGTTTTATCGGAATGCGTGTTCTGGTGAACTTTTGGCTTACGGTT	8.00179e-06	1.08537e-05	1	1	TTCAGACCACGG&GCGTGTTCTGGT	.(((((.((((.&.)))).))))).	-11	No	Yes	No
1013285_1	protein_coding	b2093	gatB	2174397	2174427	-	ATATGGATGGTGTGCATTTGATATGCACCA	protein_coding	b3210	arcB	3350656	3350729	-	AAGTGCTGAAAGCGTGGGTGGCAAAAGCCACTAAAAAATGACCCCGGCTAGACCGGGGTGCGCGAATACTGCG	0	0	1	1	ATGGTGTGCATTTGATATGCACC&CGTGGGTGGCAAAAGCCACTAA	.(((((.((.((((.(((.(((.&.))).))).)))).))))))).	-16.9	No	Yes	No
1013761_1	rRNA	b3275	rrlD	3426720	3426783	-	GGTTAAGCGACTAAGCGTACACGGTGGATGCCCTGGCAGTCAGAGGCGATGAAGGACGTGCTA	tRNA	b3799	proM	3982791	3982844	+	GAATCCTCTCTCGCCGACCAATTTTGAACCCCGCTTCGGCGGGGTTTTTTGTT	0	0	1	1	AAGCGACTAAGCGTACACGGTGGATGCCCTGGCAGTCAGAGGCGATGAAGGAC&ATCCTCTCTCGCCGACCAATTTTGAACCCCGCTTCGGCGGGGTTTTTTGTT	.(((((..((((.....((.((((.((...((...((((((((((.((((((.&.)))).))))))).......)))))...)))))))).))..)))).)))))	-27	Yes	No	No
1013854_1	ncRNA	b4443	gcvB	2942831	2942896	+	CTTCCTGTACATTTACCCTGTCTGTCCATAGTGATTAATGTAGCACCGCCTAATTGCGGTGCTTT	protein_coding	b3023	ygiV	3169172	3169242	-	AGGGAGGCAAAATGACAAACCTGACACTGGATGTAAACATTATCGATTTCCCATCAATACCTGTGGCGAT	0	0	1	1	TGTCTGTCCATAGTGATTAATGTAGCACCGCCTAATTGCGGTGCTTT&GGAGGCAAAATGACAAACCTGACACTGGATGTAAACATTATCGATTTCCCATCAATACCTGTGGCGAT	.(((.(.((((((((((((((((.(((...((....(((((((((((&.))))))...........))).))..)).)))..))))))..........))))....))))))))))	-17.7	No	Yes	No
101395_20	protein_coding	b0432	cyoA	451526	451605	-	ACTCAGGAAATACAATAAAAGTTTGGGATGGTTGTCATTATTTGCAGGCACTGTATTGCTCAGTGGCTGTAATTCTGCG	3UTR	b4484	cpxP	4106327	4106387	+	TGTTTTCCTTGCCATAGACACCATCCCTGTCTTCCCCCACATGCTGTGGGGGTTTTTTTT	0	0	81	1	ACTCAGGAAATACAATAAAAGTTTGGGATGGTTGTCATTATTTGCAGGC&CCTTGCCATAGACACCATCCCTGTCTTCCCCCACATGCTGTGGGG	.((((.............(((...(((((((.((((..(((..(((((.&.))))).))))))))))))))...))).............)))).	-27.1	Yes	Yes	Yes
1014287_1	protein_coding	b0054	lptD	55282	55358	-	TTTCACGGAGTCTCGCACTGGCGATGACAACATAACATGGGAGAATGACGACAAAACGGGTTCACTGGTGTGGGCA	5UTR	b1838	pphA	1923104	1923154	-	CAAGAGCCATTTCCCTGGACCGAATACAGGAATCGTGTTCGGTCTCTTTT	0	0	1	1	CGGAGTCTCGCACTGGCGATGACAACATAACATGGGAGAATGACGACAAAACGGGTTCA&AGAGCCATTTCCCTGGACCGAATACAGGAATCGTGTTCGGTCTCTT	.((((.(.((.((..(((((..(.......((.((((((..............(((((.&.))))).))))))))...........)..))))))).))).)))).	-22.6	No	No	Yes
1014795_1	protein_coding	b2540	hcaC	2671185	2671202	+	AGGTGGTGACATTTTCA	protein_coding	b4037	malM	4250438	4250464	+	TCCACCTTTATCAGCAGTGTAAAAGG	5.98426e-07	7.63396e-07	2	1	AGGTGGT&TCCACCTT	((((((.&.)))))).	-9.2	No	Yes	No
101503_3	rRNA	b3854	rrlA	4040229	4040258	+	ACTGCCCGGTAGCTAAATGCGGAAGAGAT	rRNA	b4009	rrlE	4212810	4212859	+	TGCCCCGAGATGAGTTCTCCCTGACTCCTTGAGAGTCCTGAAGGAACGT	0.000995814	0.00120347	1	1	CGGTAGCTAAATGCGGA&CCCGAGATGAGTTCTCCC	.((.((((.....(((.&.))).....))))..)).	-8.9	No	Yes	No
1015087_1	protein_coding	b0398	sbcD	416534	416551	-	GCGTGACATTATTACCA	protein_coding	b4037	malM	4250438	4250465	+	TCCACCTTTATCAGCAGTGTAAAAGGC	0	0	1	1	GCGTGAC&ATCAGCA	((.(((.&.))))).	-3.9	No	Yes	No
1015135_1	ncRNA	b4585	chiX	507216	507274	+	AAGTGACGGCATAATAATAAAAAAATGAAATTCCTCTTTGACGGGCCAATAGCGATAT	antisense_protein_coding	antisense-b1812	antisense-b1812	1895290	1895354	-	AGTCGGAAGTGAGCGTGAAATCTTCCTGCGGCGAGAATTGCTGGCTTTCCAGCCAGGCCCGACG	0	0	1	1	ACGGGCCAATAGCGATA&AATTGCTGGCTTTCCAGCCAGGCCCGA	.((((((..(((((((.&.)))))))............)))))).	-17.9	No	No	Yes
1015246_1	antisense_protein_coding	antisense-b0035	antisense-b0035	34974	34991	+	ACAACTGGCGTTTCTCG	5UTR	b2175	mepS	2269909	2269945	+	GTCTCGTGTCGCTTGGCATTTTTTTATAACGATATT	0	0	1	1	ACAACTGGCG&TGTCGCTTGG	.(((.((((.&.)))).))).	-5.5	Yes	No	No
10154_349	protein_coding	b1914	uvrY	1995308	1995334	-	ACCACGAACTGGTGCGCGCAGGGATA	protein_coding	b2836	aas	2975849	2975871	-	TTTACCTGTGCGTCCAGTGTTT	0	0	8	1	AACTGGTGCGCGCAGGG&ACCTGTGCGTCCAGTG	.(((((.(((((((((.&.)))))))))))))).	-25.2	No	No	Yes
101575_20	3UTR	b3844	fre	4027229	4027283	+	ATATAAAAAAACCCGCCCCTGACAGGCGGGAAGAACGGCAACTAAACTGTTATT	5UTR	b3869	glnL	4056572	4056626	-	AAGTGTTTTAGTTGCCGTGGAAACTTTTCGCCTGTCTCTGGCAGGCCTGGGATC	0	0	17	1	ACCCGCCCCTGACAGGCGGGAAGAACGGCAACTAAAC&TTTTAGTTGCCGTGGAAACTTTTCGCCTGTCTCTGGCAGGCCTGGGA	.((((((((.(((((((((((((.((((((((((((.&.)))))))))))).....)))))))))))))...))..)))..))).	-46.7	Yes	Yes	Yes
1015770_1	5UTR	b0436	tig	454996	455066	+	TATTTGAATGCTTTCGGGATGATTCTGGTAACAGGGAATGTGATTGATTATAAGAACATCCCGGTTCCGC	protein_coding	b3632	waaQ	3807539	3807574	-	CATCCAACCGACAGCGCGTCAGATATTTAAGTGTT	1.04814e-43	1.91626e-43	1	1	TATTTGAATGCTTTCGGGATGA&CATCCAACCGACAGCGCGTCAGATAT	(((((((.((((.((((((((.&)))))...))).))))..))))))).	-17.7	No	Yes	No
1015782_1	antisense_pseudogene	antisense-b4696	antisense-b4696	1594159	1594176	+	GGTGACATTTCCCGACA	protein_coding	b4350	hsdR	4585783	4585803	-	TTCCCGCCAGGCTCAATGAG	0	0	1	1	GGTGA&CCGCCA	((((.&.)))).	-6.3	No	Yes	No
1016627_1	ncRNA	b4585	chiX	507216	507252	+	AAGTGACGGCATAATAATAAAAAAATGAAATTCCTC	rRNA	b3854	rrlA	4037628	4037650	+	ATTTCCGAATGGGGAAACCCAG	0	0	1	1	ATTCCTC&TGGGGAAA	.((((((&.)))))).	-6.4	No	No	Yes
101704_2	rRNA	b3275	rrlD	3426199	3426216	-	TTGTATAATGGGTCAGC	rRNA	b3970	rrlB	4169154	4169194	+	ACCGTGTACGTACAAGCAGTGGGAGCACGCTTAGGCGTGT	3.40235e-40	5.62296e-40	1	1	TTGTATAATGGG&ACCGTGTACGT	.(((((.((((.&.))))))))).	-7.2	No	No	Yes
1017142_1	antisense_protein_coding	antisense-b1143	antisense-b1143	1201704	1201728	-	ATATATTTGCGTCAACACCGGCAC	ncRNA	b4432	ryeA	1923066	1923122	+	AAGTCAGCGAAGGAAATGCTTCTGGCTTTTAACAGATAAAAAGAGACCGAACACGA	8.18969e-101	1.79403e-100	1	1	ATATTTGCGTCAACACCGGCAC&ATGCTTCTGGCTTTTAACAGATAA	.((((((......((..((((.&.))))..))........)))))).	-6.7	No	No	Yes
1017280_1	5UTR	b3894	fdoG	4085824	4085870	-	CAAGCGAATGTAAATGGGACGTGACAATGTCGAAACAAGGAGCAAT	protein_coding	b4217	ytfK	4439662	4439724	+	TCAAGGACGTTGGCGCTTTTGAATTCGATAAGGGTAAGATTCTTATCCCAAAAGTGAAGGAT	0	0	1	1	ATGGGACGTGACAATGTCGAAACAAGGAGCA&CGCTTTTGAATTCGATAAGGGTAAGATTCTTATCCCAA	.(((((...(((..(((((((...((((((.&.))))))...)))))))..).......))...))))).	-19	No	No	Yes
1017336_1	5UTR	b0654	gltJ	686710	686736	-	TACGCTGGGTAACAATCTTCGAGGGT	5UTR	b4217	ytfK	4439531	4439552	+	AATAGTTGGGCCGATTGTGGC	0	0	1	1	TACGCTGGGTAACAATC&AGTTGGGCCGATTGTGG	((((.(.(((..((((.&.)))).))).).)))).	-8.8	No	No	Yes
1017392_1	tRNA	b1984	asnW	2058027	2058100	-	CTCTGTAGTTCAGTCGGTAGAACGGCGGACTGTTAATCCGTATGTCACTGGTTCGAGTCCAGTCAGAGGAGCC	tRNA	b3799	proM	3982794	3982843	+	TCCTCTCTCGCCGACCAATTTTGAACCCCGCTTCGGCGGGGTTTTTTGT	0	0	1	1	GTTCAGTCGGTAGAACGGCGGACTGTTAATCCGTATGTCACTGGTTCGAGTCCAGTCAGAGGAG&TCCTCTCTCGCCGACCAATTTTGAACCCCGCTTCGGCGGGGT	.(((.(((((......(((((.....................((((((((....(((((((((.&))))))......)))....)))))))))))))))))).))).	-27.5	No	Yes	No
1017393_1	tRNA	b3799	proM	3982794	3982843	+	TCCTCTCTCGCCGACCAATTTTGAACCCCGCTTCGGCGGGGTTTTTTGT	rRNA	b3854	rrlA	4037863	4037928	+	AAATGCACATGCTGTGAGCTCGATGAGTAGGGCGGGACACGTGGTATCCTGTCTGAATATGGGGG	0	0	1	1	TCCTCTCTCGCCGACCAATTTTGAACCCCGCTTCGGCGGGGTT&TGCACATGCTGTGAGCTCGATGAGTAGGGCGGGACACGTGGTATCCTGTCTGAATATGGGGG	.(((((((((((.((((...((((.....(((((((((.(((.&.)).).))))).)))))))))).))..))))))).......................)))).	-25	No	Yes	No
1017502_1	antisense_protein_coding	antisense-b1845	antisense-b1845	1928727	1928744	+	CCAGGACTTCTGGCTGA	antisense_protein_coding	antisense-b2866	antisense-b2866	3001059	3001087	-	ATTGGCTCTTCCAGTACATCCTGTTTAT	0	0	1	1	CCAGGACTTCTGGCTGA&CTCTTCCAGTACATCCTGT	.(((((...((((..((&.))..))))....))))).	-13.2	No	No	Yes
101800_17	inter	int-4514-1	int-4514-1	4536590	4536610	+	TCCCCCATGAATAAACTCCC	protein_coding	b4317	fimD	4546354	4546397	+	TCGTGCTTTTAATTTCGGTATCGGGAAAAACATGGGGGCACTG	0	0	3	1	TCCCCCATGAATAAACTCCC&CGGGAAAAACATGGGGGC	.((((((((.......((((&.))))....)))))))).	-19.1	Yes	No	No
101806_12	protein_coding	b2284	nuoF	2401406	2401438	-	AAGGCGCTGACCGGGCTGTCTCCGGACGAAAT	ncRNA	b4452	gadY	3664905	3664934	+	ACGGTTTATTAGTCTGGAGACGGCAGACT	7.12956e-82	1.48343e-81	5	1	GGCTGTCTCCGGACG&AGTCTGGAGACGGCA	.(((((((((((((.&.))))))))))))).	-26.1	No	Yes	No
1018104_1	inter	int-1767	int-1767	3657983	3658055	-	TGTAATCCGATTTAAATATCGAGTCTCCTTGTTTCGACTTAAGCTGGCAATTGGATTGCCAGCTTTCTTTTA	inter	int-2078-1	int-2078-1	4263197	4263246	+	CAGCCGAACTATAAAAAGAAAGGGCTTCCCAGGTGGAAGCCCTATTTCT	0	0	1	1	TGTTTCGACTTAAGCTGGCAATTGGATTGCCAGCTTTCTTTTA&AAAAAGAAAGGGCTTCCCAGGTGGAAGCC	.(((((.(((............(((...(((..(((((((((.&.))))))))))))...)))))).))))).	-22.2	No	No	Yes
1018168_1	protein_coding	b1407	ydbD	1475947	1475964	+	ACATTTGATCTTGCCGT	protein_coding	b2141	yohJ	2230940	2230957	+	GGTTTTTCTGGTGGTGA	0	0	1	1	ACATTTGATCTTGCCG&GGTTTTTCTGGTGG	.((((.((....(((.&)))...)).)))).	-7.4	No	Yes	No
1018343_1	ncRNA	b4585	chiX	507215	507280	+	AAAGTGACGGCATAATAATAAAAAAATGAAATTCCTCTTTGACGGGCCAATAGCGATATTGGCCA	inter	int-2933	int-2933	1526890	1526908	-	TAAAGTTACTGAATAATA	0	0	2	1	AAGTGACG&AGTTACTG	.((((((.&.)))))).	-6.7	No	No	Yes
1018347_1	protein_coding	b0096	lpxC	107406	107444	+	ATGTGACCTTCCAGGACGACGCAGAACTGCCGTTGGCC	protein_coding	b3565	xylA	3729406	3729446	-	ATAACGGCTAACTGTGCAGTCCGTTGGCCCGGTTATCGGT	4.37743e-35	7.6295e-35	1	1	TGTGACCTTCCAGGACGACGCAGAACTGCCGTTGG&ATAACGGCTAACTGTGCAGTCCGTTGGCCCGGTTATC	.((((((..(((((((..(((((....(((((((.&.)))))))...)))))..))))..)))...)))))).	-32.2	Yes	No	No
1018415_1	ncRNA	b4585	chiX	507216	507280	+	AAGTGACGGCATAATAATAAAAAAATGAAATTCCTCTTTGACGGGCCAATAGCGATATTGGCCA	3UTR	b2672	ygaM	2800495	2800535	+	CGCGTCTTTGACCCCGAAGCCTGTCTTCGGGGTTTCTTTT	0	0	1	1	TGAAATTCCTCTTTGACGGGCCAATAGCGA&CGCGTCTTTGACCCCGAAGCCTGTCTTCGGGGTTTCT	.((((((((.....((((((((((..(((.&)))....)))........)))))))...)))))))).	-22.8	No	No	Yes
101948_10	protein_coding	b3193	mlaD	3338251	3338291	-	GGTCAGTATTGGTGGCGTTGTTGTGGGTCGGGTGGCGGAT	3UTR	MalH	malG	4242579	4242621	-	GTTGTTCTGCCAATGTTATGCCGCTGCACCCTCAACTTACGT	1.12052e-08	1.60579e-08	2	1	GGCGTTGTTGTGGGTCGGGTGGCG&TGCCGCTGCACCCTCAACTTACGT	.((((.((((.((((..((((((.&.))))))..)))).))))..))))	-27.5	Yes	No	No
1019591_1	protein_coding	b0919	ycbJ	971805	971870	+	ATTGAGTGCGTCAATGAAAAAGCGGATACGGCGTTGTGGGCTTTGTATGACAGCCAGGGAAACCC	rRNA	b3854	rrlA	4038414	4038449	+	CCAACCCGATGCAAACTGCGAATACCGGAGAATGT	1.16219e-18	1.82817e-18	1	1	GGCGTTGTGGGCTTTGTATGACAGCCAGGGA&ACCCGATGCAAACTGCGAATACCGGAGAATGT	.(((((.(((..((((((.(...((..(((.&.)))...))...)))))))..)))...)))))	-15.5	No	No	Yes
1019868_1	protein_coding	b1765	ydjA	1848570	1848596	-	AAACATCCTGCGTGCGGGTATGCGTG	ncRNA	b4438	cyaR	2167114	2167139	+	CTGAAAAACATAACCCATAAAATGC	3.72392e-44	6.28113e-44	1	1	TGCGTGCGGGTATGC&ACATAACCCATAAAATGC	.((((..(((((((.&.)))).))).....))))	-9.1	No	Yes	No
1019992_1	ncRNA	b4704	arrS	3657984	3658041	-	AATATCGAGTCTCCTTGTTTCGACTTAAGCTGGCAATTGGATTGCCAGCTTTCTTTT	rRNA	b3756	rrsC	3942141	3942204	+	CAGACTCCTACGGGAGGCAGCAGTGGGGAATATTGCACAATGGGCGCAAGCCTGATGCAGCCA	0	0	1	1	AGTCTCCTTGTTTCGACTTAAGCTGGCAATTGGATTGCCAGCTTTCTT&CGGGAGGCAGCAGTGGGGAATATTGCACAATGGGCGCAAGCCTGATGCA	.((.((...((((((.((((...(((((((...(((((..(((((((.&.))))))).))))).......))))).)).)))))).))))..)).)).	-23	No	No	Yes
1020316_1	protein_coding	b0453	ybaY	475331	475404	+	GGCGAGGAAAGTTAGCCCGCTGGTGCATTGATAATAAGGAGAAATGAATGAAACTCGTGCACATGGCCAGTGG	3UTR	b0552	insH1_2	574367	574411	-	ATATATTACCCTTTATTTTTGGGGGCGTCTCAACGCCCCATTTT	0	0	1	1	GGCGAGGAAAGTTAGCCCGCTGGTGCATTGATAATAAGGA&CCTTTATTTTTGGGGGCGTCTCAACGCCC	((((..((......((((.(............(((((((.&.)))))))...).))))...))..)))).	-19.5	Yes	No	No
1020509_1	protein_coding	b0957	ompA	1019982	1020051	-	GAAAAAGACAGCTATCGCGATTGCAGTGGCACTGGCTGGTTTCGCTACCGTAGCGCAGGCCGCTCCGAA	ncRNA	b4445	omrB	2976361	2976385	-	CCCAGAGGTATTGATAGGTGAAGT	0	0	1	1	AGCTATCGCGATTGCAGTGGCACTGGC&CCCAGAGGTATTGATAGGTGAAGT	.(((.((((.....(((((.(.((((.&.)))).).)))))....)))))))	-16.3	No	No	Yes
1020531_1	ncRNA	b4585	chiX	507216	507288	+	AAGTGACGGCATAATAATAAAAAAATGAAATTCCTCTTTGACGGGCCAATAGCGATATTGGCCATTTTTTTA	rRNA	b3275	rrlD	3425853	3425923	-	AGAGCACTGTTTCGGCAAGGGGGTCATCCCGACTTACCAACCCGATGCAAACTGCGAATACCGGAGAATG	0	0	3	1	AAGTGACGGCATAATAATAAAAAAATGAAATTCCTCTTTGACGGGCCAATAGCG&AGCACTGTTTCGGCAAGGGGGTCATCCCGACTTACCAACCCGATGCAAACTG	.(((....((((.............((..((.((((((((.((((.((...((.&.))..)).)))).))))))))..))..)).............))))..))).	-19	No	Yes	No
102075_12	protein_coding	b1712	ihfA	1795544	1795572	-	ATCATTGAGGGATTGAACCTATGGCGCT	3UTR	b4484	cpxP	4106336	4106368	+	TGCCATAGACACCATCCCTGTCTTCCCCCACA	0	0	3	1	GAGGGATTGAACCTATGGCG&TGCCATAGACACCATCCCTG	.((((((.(...(((((((.&.)))))))...).)))))).	-20.4	No	Yes	No
10209_383,71707_26	inter	int-4260-1	int-4260-1	3941692	3941735	+	TGTGGGCACTCGAAGATACGGATTCTTAACGTCGCAAGACGAA	rRNA	b4007	rrsE	4209672	4209723	+	TTGGATCACCTCCTTACCTTAAAGAAGCGTTCTTTGCAGTGCTCACACAGA	1.42462e-75	2.682e-75	34	2	TGTGGGCACTCGAAGATACGGATTCTTA&AAAGAAGCGTTCTTTGCAGTGCTCACAC	((((((((((((((((.(((..(((((.&.))))).))))))))).)))))))))).	-29	Yes	Yes	No
1021287_1	ncRNA	b4585	chiX	507216	507261	+	AAGTGACGGCATAATAATAAAAAAATGAAATTCCTCTTTGACGGG	inter	int-2618	int-2618	813282	813322	-	GGCTTTTTTAACATTTGTCAAGATGAGTGATGACAGTTTT	2.5832e-13	3.89295e-13	1	1	AAAAATGAAATTCCTCTTTGACGGG&TTTGTCAAGATGAGTGATGACAGTTTT	.(((((.....(((((((((((((.&.))))))))..))).)).....)))))	-11.2	No	No	Yes
102194_22	protein_coding	b2787	gudD	2918313	2918340	-	CGATGTTTACCCATGTTGCCGCCGCTG	protein_coding	b3588	aldB	3756407	3756431	-	CTTTATTGGCGGCGAATGGGTAGC	3.54618e-05	4.74743e-05	3	1	TTTACCCATGTTGCCGCCGC&TTGGCGGCGAATGGGTAGC	.((((((((.(((((((((.&.))))))))))))))))).	-27.2	No	Yes	No
1021977_1	ncRNA	b4445	omrB	2976360	2976382	-	AGAGGTATTGATAGGTGAAGTC	3UTR	b2904	gcvH	3049091	3049146	-	CTTCTGCGGGAGAGGATCAGGGTGAGGAAAATTTATGCCTCACCCTCACTCTCTT	0	0	1	1	AGAGGTATTGATAGGTGAAGTC&TGCCTCACCCTCACTCTCTT	(((((...(((..(((((.((.&.)).))))).))).))))).	-12.7	No	Yes	No
1022004_1	antisense_protein_coding	antisense-b3737	antisense-b3737	3920980	3921001	+	CCTCCTTACCTTAAAGAAGCGTACTTTGCAGTGCTCACACAG	inter	int-4474	int-4474	4478891	4478909	-	GTGTGGGCACTCGAAGATACGGATTCTTAACGTCGCAAGACGAAAAATGAATACCA	0	0	1	1	AAAGAAGCGTACTTTGCAGTGCTCACACA&GTGTGGGCACTCGAAGATACGGATTCTTA	.(((((.(((((((((.(((((((((((.&)))))))))))))))).))))..))))).	-33.1	Yes	No	No
10220_383,39464_20	rRNA	b0201	rrsH	225304	225346	+	CCTCCTTACCTTAAAGAAGCGTACTTTGCAGTGCTCACACAG	inter	int-1669	int-1669	3428822	3428878	-	GTGTGGGCACTCGAAGATACGGATTCTTAACGTCGCAAGACGAAAAATGAATACCA	1.12079e-116	2.38896e-116	17	2	AAAGAAGCGTACTTTGCAGTGCTCACACA&GTGTGGGCACTCGAAGATACGGATTCTTA	.(((((.(((((((((.(((((((((((.&)))))))))))))))).))))..))))).	-33.1	Yes	Yes	No
1022277_1	ncRNA	b4445	omrB	2976361	2976382	-	AGAGGTATTGATAGGTGAAGT	protein_coding	b4210	ytfF	4432335	4432352	-	TCTGATGGTTGCGATAG	0.000768758	0.000993376	1	1	GGTATTGATAGGT&TCTGATGGTTGCG	.(((.(.(((((.&)))).).).))).	-2.8	No	Yes	No
1022448_1	protein_coding	b2597	raiA	2737486	2737542	+	GAAGAGTAGTCCTTTATATTGAGTGTATCGCCAACGCGCCTTCGGGCGCGTTTTTT	ncRNA	b2911	ssrS	3055963	3056016	+	GAGTAACCGTGAAGACAAAATTTCTCTGAGATGTTCGCAAGCGGGCCAGTCCC	0	0	1	1	TGAGTGTATCGCCAACGCGCCTTCGGGCGCGT&CCGTGAAGACAAAATTTCTCTGAGATGTTCGCAAGCGGGCCAGTCC	.((.((..((((...((.((.((((((((((.&.)))).............))))))..)).))...))))..)).)).	-15.5	No	Yes	No
1022679_1	protein_coding	b1247	oppF	1306027	1306074	+	CTGGGCATGAAACCCGATGAATGGCGTGCCGTTCGCAGTGATATTCA	ncRNA	b4450	arcZ	3350642	3350670	+	TTCCCTGGTGTTGGCGCAGTATTCGCGC	2.02907e-10	2.71408e-10	1	1	CCGATGAATGGCGTGCCGTTCGCAGTGAT&TTCCCTGGTGTTGGCGCAGTATTCGCGC	.((.((((((..((((((....(((.((.&.)).)))....))))))..)))))))).	-20	No	Yes	No
1023492_1	inter	int-1767	int-1767	3657984	3658055	-	TGTAATCCGATTTAAATATCGAGTCTCCTTGTTTCGACTTAAGCTGGCAATTGGATTGCCAGCTTTCTTTT	ncRNA	b4452	gadY	3664874	3664970	+	AAAGTTTCCCGTGCCAACAGGGAGTGTTATAACGGTTTATTAGTCTGGAGACGGCAGACTATCCTCTTCCCGGTCCCCTATGCCGGGTTTTTTTTA	0	0	6	1	TAATCCGATTTAAATATCGAGTCTCCTTGTTTCGACTTAAGCTGGCAATTGGATTGCCA&AGGGAGTGTTATAACGGTTTATTAGTCTGGAGACGGCAGACTATCCTCTTCCCGGTCCCCTATGCCGGGTTT	.((((((........(((((((((((..((((((((((((((((......(.(((.((.&.)).))).).....)))))))..))))..))))))).)))))..........)))).........)))))).	-30.8	No	Yes	Yes
102365_17	ncRNA	b4450	arcZ	3350641	3350663	+	TTTCCCTGGTGTTGGCGCAGTA	rRNA	b3756	rrsC	3943205	3943247	+	CCGCCCGTCACACCATGGGAGTGGGTTGCAAAAGAAGTAGGT	0	0	1	1	TTTCCCTGGTGTTGGCGC&CCGTCACACCATGGGAGT	.((((((((((.(((((.&.)))))))))).))))).	-21.2	Yes	No	No
1024094_1	protein_coding	b2467	nudK	2583468	2583498	-	TTTCGCGCTGTGGAGTCGGTATGACGCAAC	antisense_protein_coding	antisense-b2777	antisense-b2777	2905090	2905110	+	TTTCGAGCAGATCAGTCAGT	0	0	1	1	CGCTGTGGAGTCGGTATGAC&TTCGAGCAGATCAGTCAGT	.((((....(((.((.(((.&.))).)).)))....))))	-7.9	No	Yes	No
1025307_1	protein_coding	b3002	yqhA	3149416	3149443	-	ATGCTTCTCGCTGGCTGCTTGCCCCCG	rRNA	b3968	rrsB	4167573	4167609	+	TGAATTGACGGGGGCCCGCACAAGCGGTGGAGCATG	0.00458199	0.0057447	1	1	ATGCTTCTCGCTGGCTGCTTGCCCCCG&ACGGGGGCCCGCACAAGCGGTGGAGCATG	((((((((((((.(.(((..(((((((&.)))))))..)))).))))).))))))).	-36.1	No	Yes	No
1025308_1	rRNA	b0201	rrsH	224685	224721	+	TGAATTGACGGGGGCCCGCACAAGCGGTGGAGCATG	protein_coding	b3002	yqhA	3149418	3149443	-	ATGCTTCTCGCTGGCTGCTTGCCCC	0.00701496	0.00869772	1	1	GGGGGCCCGCACAAGCGGTGGAGCATG&ATGCTTCTCGCTGGCTGCTTGCCCC	.(((((..((((.(((((.(((((((.&)))))))))))).).)))..)))))	-29.9	No	Yes	No
1025309_1	protein_coding	b3002	yqhA	3149416	3149443	-	ATGCTTCTCGCTGGCTGCTTGCCCCCG	rRNA	b3851	rrsA	4036445	4036481	+	TGAATTGACGGGGGCCCGCACAAGCGGTGGAGCATG	0.00674991	0.00837462	1	1	ATGCTTCTCGCTGGCTGCTTGCCCCCG&ACGGGGGCCCGCACAAGCGGTGGAGCATG	((((((((((((.(.(((..(((((((&.)))))))..)))).))))).))))))).	-36.1	No	Yes	No
1025486_1	ncRNA	b4438	cyaR	2167117	2167138	+	AAAAACATAACCCATAAAATG	rRNA	b3855	rrfA	4040515	4040554	+	TTGCCTGGCGGCAGTAGCGCGGTGGTCCCACCTGACCCC	0	0	1	1	CCCATA&GGTGGT	.((((.&.)))).	-4.3	No	Yes	No
1025641_1	protein_coding	b1325	ycjG	1389804	1389851	+	GGTCAGTTTCGCCGATCTTGACGGACCGACCTGGCTGGCGGTAGATG	ncRNA	b4698	mgrR	1622832	1622851	-	AAGCATTCACCGCCGGTTT	3.74797e-13	5.63698e-13	1	1	TGGCTGGCGGTAGATG&GCATTCACCGCCGGTTT	.((((((((((.((((&.)))).)))))))))).	-19.8	No	Yes	No
1026006_1	rRNA	b3275	rrlD	3425853	3425894	-	CGACTTACCAACCCGATGCAAACTGCGAATACCGGAGAATG	inter	int-1697	int-1697	3496962	3496989	-	AAAAAATAAAAACAAAAAATAAAACAA	0.0043318	0.00543376	1	1	CTGC&ACAA	.((.&.)).	0	No	No	Yes
1026014_1	tRNA	b2401	valU	2520922	2520981	+	CACAGCGGGGGTGATTAGCTCAGCTGGGAGAGCACCTCCCTTACAAGGAGGGGGTCGGC	rRNA	b2589	rrlG	2728254	2728295	-	CGACTTACCAACCCGATGCAAACTGCGAATACCGGAGAATG	2.03627e-178	5.08391e-178	1	1	GCTGGGAGAGCACCTCCCTTACAAGGAGGGGGTCGG&CGACTTACCAACCCGATGCAAACTGCGAATACCGGA	.((((....(((............((..(((((((.&)))))..))..))..........))).....)))).	-16.9	No	No	Yes
1026102_1	protein_coding	b3516	gadX	3664928	3664998	-	AATAAGATTATAGAGTTTTACTCAGACATAAAAAAAACCCGGCATAGGGGACCGGGAAGAGGATAGTCTG	protein_coding	b3894	fdoG	4085821	4085859	-	AAATGGGACGTGACAATGTCGAAACAAGGAGCAATCCA	0	0	1	1	AGTTTTACTCAGACATAAAAAAAACCCG&TGGGACGTGACAATGTCGAAACAAGGAGCA	.(((((.....(((((........(((.&.)))........))))).......))))).	-10.9	No	No	Yes
1026618_1	protein_coding	b2039	rfbA	2110972	2111027	-	ATGATGAAATGAAAATGCGTAAAGGTATTATTTTAGCGGGTGGTTCTGGTACACG	ncRNA	b4704	arrS	3657984	3658041	-	AATATCGAGTCTCCTTGTTTCGACTTAAGCTGGCAATTGGATTGCCAGCTTTCTTTT	0	0	1	1	AGGTATTATTTTAGCGGGTGGTTCTGGTACAC&TTGTTTCGACTTAAGCTGGCAATTGGATTGCCA	.((((........((.(((((((..((.(((.&.))).))))))...))).))........)))).	-13	No	Yes	No
102678_17	protein_coding	b1615	uidC	1692791	1692826	-	TTATTTGCCTGACGGCTGCCTCTGGCCTTACCTCT	ncRNA	b3864	spf	4049899	4049966	+	TAGGGTACAGAGGTAAGATGTTCTATCTTTCAGACCTTTTACTTCACGTAATCGGATTTGGCTGAAT	3.03337e-06	4.15277e-06	1	1	TGACGGCTGCCTCTGGCCTTAC&TAGGGTACAGAGGTAAGATGTTC	.((((..((((((((((((((.&)))))).))))))))...)))).	-20.9	Yes	No	No
1027132_1	rRNA	b3278	rrsD	3428577	3428611	-	ACTACTGGAAACGGTAGCTAATACCGCATAACGT	rRNA	b4007	rrsE	4208200	4208263	+	ATGCAAGTCGAACGGTAACAGGAAGAAGCTTGCTTCTTTGCTGACGAGTGGCGGACGGGTGAG	2.68582e-75	5.46114e-75	1	1	ACTACTGGAAACGGTAGCTAATACCGCATAACGT&AACGGTAACAGGAAGAAGCTTGCTTCTTTGCTGACGAGTGGC	.(((((.(...((((((((..(.((......(((&.)))......)).)..)))).........)))).).))))).	-15.6	No	Yes	No
1027250_1	protein_coding	b2961	mutY	3104001	3104073	+	AGTTGGCCTAGCGGCTCCCGTGGAGCGTTTGTTACAGCAGTTACGCACTGGCGCGCCGGTTTAGCGCGTGAG	protein_coding	b3708	tnaA	3888915	3888953	+	ATGCAGGCTGCGATGATGCGCGGCGACGAAGCCTACAG	2.77926e-05	3.7327e-05	1	1	CGGCTCCCGTGGAGCGTTTGTTACAGCAGTTACGCAC&ATGCAGGCTGCGATGATGCGCGGCGACGAAGCCT	.((((..(((.(.((((..((((..((((((..(((.&.))).))))))..))))))))..).))).)))).	-28.6	No	Yes	No
1027302_1	tRNA	b1666	valW	1746558	1746616	+	GGGGTCGGTGGTTCGAGTCCACTCGGACGCACCAGATTTTCTTAATCTGGTCTTCTCC	protein_coding	b3748	rbsD	3933504	3933567	+	TGCAGGTGCTGGGCGTCGTCACAAATGAAATGCAGGTCGAGGCGGCCATTATCGCGGAAGAGA	0	0	1	1	GGGGTCGGTGGTTCGAGTCCACTCGGACGCACCAGATTTTCTTAATCTGG&GCAGGTGCTGGGCGTCGTCACAAATGAAATGCAGGTCGAGGCGGCCATTATCGCG	(.(((.(((((.(((..((.(((..(((((.((((.........(((((.&.))))).))))))))).................))).))..))))))))))).).	-28.8	No	Yes	No
102753_10	rRNA	b2591	rrsG	2730369	2730396	-	TGCGAAAGCGTGGGGAGCAAACAGGAT	tRNA	b2816	metV	2947663	2947715	+	AAATCCGGCCCCCGCAACCAATTATTGAACACCCTAACGGGTGTTTTTTTGT	4.39685e-203	1.13396e-202	1	1	CGTGGGGAGCAAACAGGAT&AATCCGGCCCCCGCA	.((((((.((.....((((&.)))).)))))))).	-16.3	Yes	No	No
1028031_1	inter	int-3968	int-3968	3426794	3426821	-	TTTTCGCAACTCTGAAGTGAAACATCT	protein_coding	b3793	wzyE	3979755	3979803	+	TTCTGCTTTGGGGCGATCTTCAATATGATCGTGCTGGCGCGTGAAGGG	9.29711e-114	1.9706e-113	1	1	TTCGCAACTCTGAAGTGAAA&TTCTGCTTTGGGGCGAT	.((((...(((((((((((.&))).)))))))))))).	-12	No	Yes	No
10283_65	protein_coding	b3514	mdtF	3661589	3661639	+	TTGACTATGTTCGGGATGGTGCTGGCGATAGGGTTACTGGTGGATGACGC	3UTR	b4484	cpxP	4106327	4106386	+	TGTTTTCCTTGCCATAGACACCATCCCTGTCTTCCCCCACATGCTGTGGGGGTTTTTTT	0	0	38	1	TTGACTATGTTCGGGATGGTGCTGGCGATAGGGTTACTGGTGGATGACG&TGTTTTCCTTGCCATAGACACCATCCCTGTCTTCCCCCACATGCTGTGGGG	((.(((((((..((((.((.((.((.(((.(((((..(((((((.(((.&.))).)))..))))..))).))))))).))))))))..)))))..)).)).	-30.6	No	Yes	Yes
1028702_1	inter	int-1669	int-1669	3428859	3428898	-	AACAATTTATCAGACAATCTGTGTGGGCACTCGAAGATA	antisense_protein_coding	antisense-b3894	antisense-b3894	4084018	4084065	+	CTTCGTTCAGCTCACCGTGGTTCTGCCAGAAGTTAGAGGTTTCAGTG	0	0	1	1	CAATTTATCAGACAATCTGTGTGGGCACTCGAAGA&CTTCGTTCAGCTCACCGTGGTTCTGCCAGAAGTTA	.(((((..((((..(((((.((((((...(((((.&)))))....)))))))).)))))))....))))).	-19.9	No	No	Yes
1029196_1	ncRNA	b4432	ryeA	1923097	1923121	+	ACAGATAAAAAGAGACCGAACACG	5UTR	b3894	fdoG	4085833	4085877	-	CACGCAGCAAGCGAATGTAAATGGGACGTGACAATGTCGAAACA	0	0	1	1	AGACCGAACACG&ACGTGACAATGTCG	.(((....((((&.)))).....))).	-6.1	No	No	Yes
1029419_1	protein_coding	b3266	acrF	3418103	3418122	+	CTTTGTGGTGATCCGCCGT	rRNA	b4010	rrfE	4213105	4213158	+	GCGCCGATGGTAGTGTGGGGTCTCCCCATGCGAGAGTAGGGAACTGCCAGGCA	0	0	1	1	CTTTGTGGTGATCCGCCGT&GATGGTAGTGTGGGGTCTCCCCATGCGAGA	.(((((((.((((((((((&.)))))......))))).))....))))).	-13.7	No	Yes	No
1029466_1	ncRNA	b4444	omrA	2976102	2976162	-	TCGGTACGCTCTTCGTACCCTGTCTCTTGCACCAACCTGCGCGGATGCGCAGGTTTTTTT	rRNA	b4010	rrfE	4213105	4213160	+	GCGCCGATGGTAGTGTGGGGTCTCCCCATGCGAGAGTAGGGAACTGCCAGGCATC	0	0	1	1	CGCTCTTCGTACCCTGTCTCTTGCACCAACCTGCGCGGATGCGCA&GCGCCGATGGTAGTGTGGGGTCTCCCCATGCGAGAGTAGGGAACTGCCAGGCA	.(((....((.(((((.((((((((((.((((((.((...((((.&))))...)))))).)).)).........))))))))))))).)).....))).	-37.6	No	Yes	No
1029470_1	protein_coding	b1415	aldA	1488705	1488733	+	ATTGCCCGCAAAATGGCTCCCGCTCTTT	rRNA	b3756	rrsC	3942726	3942757	+	TTGACGGGGGCCCGCACAAGCGGTGGAGCAT	9.25251e-07	1.28355e-06	1	1	TTGCCCGCAAAATGGCTCCCGCTCT&TGACGGGGGCCCGCACAAGCGGTGGAGCAT	.(((((((.....((((((((.((.&.)))))))))).......))))....))).	-24.6	Yes	No	No
102956_1	protein_coding	b3795	yifK	3981942	3981982	+	ATTCCCAATCCGCAGCGTGTGTTTGTCTACGTCTACAGTG	ncRNA	b3864	spf	4049904	4049947	+	TACAGAGGTAAGATGTTCTATCTTTCAGACCTTTTACTTCACG	1.60324e-33	2.57112e-33	1	1	GCGTGTGTTTGTCTACGTCTACA&GGTAAGATGTTCTATCTTTCAGACCTTTTACTTCACG	.((((.((..((((((((((((.&.))).)))))..........)))).....))..))))	-10.9	Yes	No	No
1029604_1	protein_coding	b1415	aldA	1488705	1488733	+	ATTGCCCGCAAAATGGCTCCCGCTCTTT	rRNA	b3968	rrsB	4167577	4167608	+	TTGACGGGGGCCCGCACAAGCGGTGGAGCAT	1.11796e-06	1.54574e-06	1	1	TTGCCCGCAAAATGGCTCCCGCTCT&TGACGGGGGCCCGCACAAGCGGTGGAGCAT	.(((((((.....((((((((.((.&.)))))))))).......))))....))).	-24.6	Yes	No	No
1029640_1	protein_coding	b1415	aldA	1488705	1488733	+	ATTGCCCGCAAAATGGCTCCCGCTCTTT	rRNA	b3851	rrsA	4036449	4036480	+	TTGACGGGGGCCCGCACAAGCGGTGGAGCAT	2.87245e-06	3.93605e-06	1	1	TTGCCCGCAAAATGGCTCCCGCTCT&TGACGGGGGCCCGCACAAGCGGTGGAGCAT	.(((((((.....((((((((.((.&.)))))))))).......))))....))).	-24.6	Yes	No	No
102973_17	protein_coding	b1766	sppA	1850226	1850243	+	CTATCACCAGGGCACTG	ncRNA	b4450	arcZ	3350642	3350662	+	TTCCCTGGTGTTGGCGCAGT	5.18521e-209	1.34981e-208	2	1	CTATCACCAGGGC&TCCCTGGTGTTGGC	(((.((((((((.&.)))))))).))).	-17.5	Yes	No	No
1030195_1	tRNA	b3976	thrU	4175408	4175434	+	GAGCAACTGACTTGTAATCAGTAGGT	rRNA	b4009	rrlE	4211686	4211730	+	GCTTGAGAGAACTCGGGTGAAGGAACTAGGCAAAATGGTGCCGT	0	0	1	1	GCAACTGACTTGTAATCAGTAGGT&GCTTGAGAGAACTCGGGTGA	.((.((((...((..((..(((((&))))).))..)))))).)).	-7	No	No	Yes
1031096_1	ncRNA	b4585	chiX	507221	507288	+	ACGGCATAATAATAAAAAAATGAAATTCCTCTTTGACGGGCCAATAGCGATATTGGCCATTTTTTTA	protein_coding	b2520	yfhM	2647362	2647406	-	CAACCGATGGTGGAATCAATGTATGTTCCCCAATGGCGGGCGAC	2.49882e-167	6.15075e-167	1	1	TTCCTCTTTGACGGGCCAATAGCGATATTGGCCATTT&CGATGGTGGAATCAATGTATGTTCCCCAATGGCGGGC	.(((((.(((..(((.(((((..(((.((.((((((.&.)))))).)))))..))).))..)))))).)).))).	-17.9	No	No	Yes
1032129_1	protein_coding	b1653	lhr	1731660	1731695	+	ACGACCACTACGCCCTCGCCTTTCGCCACAAGTTT	ncRNA	b4432	ryeA	1923083	1923156	+	GCTTCTGGCTTTTAACAGATAAAAAGAGACCGAACACGATTCCTGTATTCGGTCCAGGGAAATGGCTCTTGGG	1.3104e-38	2.32605e-38	1	1	CGACCACTACGCCCTCGCCTTTCGCCACAAGTT&GCTTCTGGCTTTTAACAGATAAAAAGAGACCGAACACGATTCCTGTATTCGGTCCAGGGAAATGGCTCT	.(((((.....((((.(((((((((((.((((.&)))).))))................)))).....................)))..))))...))).)).	-15.6	No	No	Yes
1032214_1	antisense_protein_coding	antisense-b2466	antisense-b2466	2582747	2582764	+	AAAAAAGAGAAGGAAAA	ncRNA	b4408	csrB	2924231	2924296	-	AGGAAGCAATAGTTCAGGATGAACGATTGGCCGCAAGGCCAGAGGAAAAGTTGTCAAGGATGAGC	0	0	1	1	AGGA&GCCA	.((.&.)).	-2	No	Yes	No
1032231_1	ncRNA	b4408	csrB	2924231	2924296	-	AGGAAGCAATAGTTCAGGATGAACGATTGGCCGCAAGGCCAGAGGAAAAGTTGTCAAGGATGAGC	ncRNA	b4444	omrA	2976102	2976168	-	GATTATTCGGTACGCTCTTCGTACCCTGTCTCTTGCACCAACCTGCGCGGATGCGCAGGTTTTTTT	0	0	1	1	AGCAATAGTTCAGGATGAACGATTGGCCGCAAGGCCAGAGGAAAAGTTGTCAAGGATGAG&ATTATTCGGTACGCTCTTCGTACCCTGTCTCTTGCACCAACCTGCGCGGATGCG	.(((...((.((((........((((..((((((.((((.(((.((.(((...((((((.&.))))))...))))).))).)...))).).))))).)))))))).))...))).	-29.3	No	Yes	No
1032564_1	3UTR	b0879	macB	922854	922893	+	GCTCTTGTCAGCGGCAGGGCGTTCTGCCGATAACCGTAA	ncRNA	b4452	gadY	3664811	3664866	+	TGTTTATAAAAAAATGGCTGATCTTATTTCCAGTAAAAGTTATATTTAACTTACT	4.69951e-48	8.72799e-48	1	1	TGTCAGCG&GGCTGATC	.((((((.&.)))))).	-8.9	No	Yes	No
1032670_1,129571_2	inter	int-3645-1	int-3645-1	2814749	2814805	+	ATTTTTTTAAAAATTTTCTGAACTCTTTCTTCCCAGGCGAGTCTGAGTATATGAAA	rRNA	b4007	rrsE	4209010	4209041	+	ACGCGTTAAGTCGACCGCCTGGGGAGTACGG	1.60052e-54	2.82046e-54	2	2	TCTTCCCAGGCGAGTCTGAGTATATGA&GCGTTAAGTCGACCGCCTGGGGAGT	.(((((((((((.(((.((.(..(((.&.)))..).)))))))))))))))).	-28.8	Yes	Yes	Yes
1032689_1	ncRNA	b4704	arrS	3657984	3658054	-	GTAATCCGATTTAAATATCGAGTCTCCTTGTTTCGACTTAAGCTGGCAATTGGATTGCCAGCTTTCTTTT	protein_coding	b3709	tnaB	3890314	3890363	+	TGTTTGCTTTACCTGTTGATCTTGCCGGTGCCTGGTTTTTCTGGGGTGC	0	0	1	1	AGTCTCCTTGTTTCGACTTAAGCTGGCAATTGGATTGCCAGC&CCTGTTGATCTTGCCGGTGCCTGGTTTTTCTGGGGTGC	.((.((((.(....((((...(((((((...((((((.(((.&.))).)))))))))))))....))))...).)))).))	-23.7	No	Yes	No
1032932_1	protein_coding	b0397	sbcC	413900	413917	-	CGGTTACTCAGCCAACG	rRNA	b3970	rrlB	4170913	4170948	+	ACGGAGGAGCACGAAGGTTGGCTAATCCTGGTCGG	0	0	1	1	CGGTTACTCAGCCAACG&GGTTGGCTAATCCTGGTCGG	((((((...(((((((.&.))))))).....)))))).	-12	No	No	Yes
103315_19	antisense_protein_coding	antisense-b2369	antisense-b2369	2484022	2484054	-	CACGAAACCATTAGCGCCAGCATCAGCACAAT	ncRNA	b4450	arcZ	3350641	3350660	+	TTTCCCTGGTGTTGGCGCA	0.00245678	0.0031156	3	1	AGCGCCAGCATCAGC&CCTGGTGTTGGCGCA	.(((((((((((((.&.))))))))))))).	-25	No	Yes	No
103322_19	protein_coding	b0219	yafV	239353	239433	-	TTTAGGTTGTGGTGAGTGGGGGTTGTGTTTAAGGACGGGGAGAGTCGGGGTATTACTACGAAAGCCCGCTCCCCGCAAGG	3UTR	b4484	cpxP	4106331	4106369	+	TTCCTTGCCATAGACACCATCCCTGTCTTCCCCCACAT	3.68952e-143	8.77649e-143	7	1	AGTGGGGGTTGTGTTTAAGGACGGGGAGAGTCGGGGTAT&TTGCCATAGACACCATCCCTGTCTTCCCCCACA	.(((((((.........((((((((((..(((..((((.&.))))...)))....))))))))))))))))).	-37.2	No	Yes	No
1033390_1	5UTR	b3055	ygiM	3201065	3201112	+	AACGGGCAATTTGACGGGCGTAAAAGTTTGAAGCAGTGGCAAGACCT	protein_coding	b3823	rhtC	4007853	4007908	+	GTTCCCGTAAAGAAGCGATGATGGGCGTGCTGGGCATTACCTGCGGCGTAATGGT	2.68569e-05	3.60897e-05	1	1	GGCGTAAAAGTTTGAAGCAGTGGCAAGACCT&TGGGCGTGCTGGGCATTACCTGCGGCGTA	.((((...((..(((.((..(((((...((.&.))...))))).)).))).))...)))).	-14.9	No	No	Yes
103342_1	protein_coding	b0014	dnaK	13886	13929	+	TCTGAAAGGTGAAGACAAAGCCGCTATCGAAGCGAAAATGCAG	tRNA	b0206	aspU	228921	228942	+	TTCGGTGGAGCGGTAGTTCAG	0.0069498	0.00813001	1	1	TCTGAAAGGTGAAGACAAAGCCGCTATCGAAG&TTCGGTGGAGCGGTAGTTCAG	.(((((.............((((((((((((.&))))))..))))))..)))))	-15.8	Yes	No	No
1034283_1	inter	int-94	int-94	192694	192749	-	TTGCCATTTTGGCCCCGGGCAGTGCTCGCCATCCTCACGTACTTTTGTACGCTCC	protein_coding	b3748	rbsD	3933504	3933554	+	TGCAGGTGCTGGGCGTCGTCACAAATGAAATGCAGGTCGAGGCGGCCATT	0.000122698	0.000162036	1	1	TGCCATTTTGGCCCCGGGCAGTGCTCGCCATCCTCACGTACTTTTGTAC&TGCAGGTGCTGGGCGTCGTCACAAATGAAATGCAGGTCGAGGCGGCC	.(((.((((((((....(((((((.((((.....((.(((((..((((.&)))))))))))))))..).)))........))).)))))))).))).	-27.8	Yes	No	No
1035314_1	tRNA	b3761	trpT	3946954	3947015	+	TTAGGGGCGTAGTTCAATTGGTAGAGCACCGGTCTCCAAAACCGGGTGTTGGGAGTTCGAG	protein_coding	b4014	aceB	4216815	4216880	+	GATGCGGCGACGGCTGAAATTTCCCGTACCTCGATCTGGCAGTGGATCCATCATCAAAAAACGTT	7.6919e-88	1.62751e-87	1	1	GGGCGTAGTTCAATTGGTAGAGCACCGGTCTCCAAAACCGGGTGTTGGGAGTTCGA&CTGAAATTTCCCGTACCTCGATCTGGCAGTGGATCCATCATCAAAAAACGTT	.(((((........((((.((...(((.(..(((....((((.((((((((((((.&.))))..)))))).))))))...))).).))).)).)))).......)))))	-24.3	No	Yes	No
1035653_1	protein_coding	b0740	tolB	778923	778983	+	GGGGATGGGATCCGTGCTGAATTTGGTTTCTACAGATGGGCGTTTCAAAGCGCGTCTTCC	ncRNA	b4444	omrA	2976100	2976161	-	CGGTACGCTCTTCGTACCCTGTCTCTTGCACCAACCTGCGCGGATGCGCAGGTTTTTTTTC	0	0	1	1	ATGGGATCCGTGCTGAATTTGGTTTCTACAGATGGGCGTTTCAAAGCGCGTCTT&CGGTACGCTCTTCGTACCCTGTCTCTTGCACCAACCTGCGCGGATGCGCAG	.(((.((((((((.(...(((((......(((((((.((..(.(((.((((((.&.)).)))).))).).))))))))).....))))).).)))))))).).)).	-37.3	No	Yes	No
1036118_1	protein_coding	b0946	zapC	1005934	1005999	+	GGGTAGGGGAGAGGCAGATGCGAATTAAACCAGACGATAACTGGCGTTGGTATTACGATGAAGAG	tRNA	b3760	aspT	3946893	3946949	+	GAATACCTGCCTGTCACGCAGGGGGTCGCGGGTTCGAGTCCCGTCCGTTCCGCCAC	0	0	1	1	GGGTAGGGGAGAGGCAGATGCGAATTAAACCAGACGATAACTGGCGTTGGTATTA&GAATACCTGCCTGTCACGCAGGGGGTCGCGGGTTCGAGTCCCGTCCGTTCCGCCA	.(((.((((.(.(((.(((.(((((....((.(.((((..((.((((.((((((.&.))))))........)))).))..)))))))))))).)))..)))).))))))).	-32.7	No	Yes	No
103633_22	inter	int-1073-1	int-1073-1	2043157	2043181	+	ATCTGACGGCCGCGTTCCTTTTTT	protein_coding	b3250	mreC	3399833	3399868	-	AATCCGTACTTATATGGATACCGCCGTCAGTCCTT	2.06118e-86	4.34648e-86	7	1	TCTGACGGCCGCGTTCCT&TGGATACCGCCGTCAGT	.(((((((.((.(((((.&.))).))))))))))).	-18.8	No	Yes	No
103660_19	rRNA	b3275	rrlD	3426722	3426779	-	AAGCGACTAAGCGTACACGGTGGATGCCCTGGCAGTCAGAGGCGATGAAGGACGTGC	protein_coding	b3748	rbsD	3933576	3933645	+	ATAATCCGCAACTCCACGAAACGTTGCTCACTCACCTTGAGCAGCTGCAAAAACACCAGGGAAATACCA	0	0	1	1	CGGTGGATGCCCTGGCAGTCAGAGGCGATGAAGGACGTG&AACGTTGCTCACTCACCTTGAGCAGCTGCAAAAACACCAGGGAAATACCA	.((((....((((((((((..((((.(((((..(((((.&.)))))..))).)).)))).....)))))........)))))...)))).	-32.9	No	Yes	No
1036895_1	protein_coding	b1866	aspS	1949857	1949886	-	GTTAAATGCTTCCGTGACGAAGACCTGCG	5UTR	b2997	hybO	3146266	3146287	-	AGGTCTTCGCAACGGAATAAC	0.0100052	0.0122996	2	1	CTTCCGTGACGAAGACCTG&AGGTCTTCGCAACGGAAT	.((((((..(((((((((.&)))))))))..)))))).	-24.6	No	Yes	No
1037094_1	antisense_protein_coding	antisense-b0177	antisense-b0177	199541	199602	-	AGGTGCTCGGATGTTCACCCATAGAGTACAGATAACGCCACATCGCAACCTGAGGCTGCAT	tRNA	b1977	asnT	2044557	2044622	+	GTTCAGTCGGTAGAACGGCGGACTGTTAATCCGTATGTCACTGGTTCGAGTCCAGTCAGAGGAGC	1.86683e-18	2.93477e-18	1	1	AGGTGCTCGGATGTTCACCCATAGAGTACAGATAACGCCACATCGCAACCTGAGGCTGC&TCAGTCGGTAGAACGGCGGACTGTTAATCCGTATGTCACTGGTTCGAGTCCA	.((.((((((((.......((((((..((((....((((...((...(((...(((((.&.)))))))).))..))))..))))...))..))))......)))))))))).	-30.3	No	Yes	No
1037357_1	ncRNA	b4432	ryeA	1923083	1923156	+	GCTTCTGGCTTTTAACAGATAAAAAGAGACCGAACACGATTCCTGTATTCGGTCCAGGGAAATGGCTCTTGGG	protein_coding	b4016	aceK	4218884	4218942	+	AGATTGCGGAGAGCTTTTTTAACTCCGTGTACTGTCGGTTATTTGACCACCGCTCGCT	0	0	2	1	GCTTCTGGCTTTTAACAGATAAAAAGAGACCGAACACGATTCCTGTATTCGGTCCAGGGAAATGGCTCTTGGG&GCGGAGAGCTTTTTTAACTCCGTGTACTGTCGGTTATTTGACCACCGCTCGCT	((....(((......(((((.......(((((.(((........((((.(((......((((.(((((((.(.&.).))))))).))))....))).)))))))))))))))))......))).)).	-29.8	No	No	Yes
103736_10	5UTR	b0957	ompA	1020116	1020136	-	CAGATCCCCCGGTGAAGGAT	rRNA	b3854	rrlA	4037681	4037717	+	CATAGGTTAATGAGGCGAACCGGGGGAACTGAAACA	0	0	1	1	CAGATCCCCCGGTG&AACCGGGGGAACTGA	(((.(((((((((.&.))))))))).))).	-24.1	Yes	No	No
103764_22	protein_coding	b0953	rmf	1015699	1015734	+	TGAGGGAAACGAGGCATGAAGAGACAAAAACGAGA	tRNA	b4165	glyY	4392634	4392658	+	GTTCGAGTCTCGTTTCCCGCTCCA	7.74196e-184	1.94913e-183	1	1	AGGGAAACGAGGCATGAAG&GTTCGAGTCTCGTTTCCCG	.((((((((((((.((((.&.)))).)))))))))))).	-25.6	No	No	Yes
1038317_1	protein_coding	b0050	apaG	51218	51262	-	ATTCCGACTCGCCGTTCCCACACTCATTCATTAAAAGAATATGG	rRNA	b3758	rrlC	3944716	3944745	+	ATGGTTAAGTGGGAAACGATGTGGGAAGG	1.48753e-52	2.80782e-52	1	1	ATTCCGACTCGCCGTTCCCACA&AGTGGGAAACGATGTGGGAAG	.((((.(((((...(((((((.&.))))))).))).)).)))).	-22.2	No	Yes	No
1038392_1	ncRNA	b4585	chiX	507216	507288	+	AAGTGACGGCATAATAATAAAAAAATGAAATTCCTCTTTGACGGGCCAATAGCGATATTGGCCATTTTTTTA	5UTR	b4606	ypfM	2591021	2591050	-	AGTATTAGATGCCGTATGAATATCTCGAA	5.10471e-48	9.4782e-48	1	1	GACGGCATAATAATAA&GTATTAGATGCCGTA	.(((((((..(((((.&.))))).))))))).	-13.3	No	Yes	No
1038460_1	antisense_protein_coding	antisense-b0967	antisense-b0967	1029518	1029539	+	ATTCCGGGTACAGCGTTTGCA	ncRNA	b4438	cyaR	2167114	2167157	+	CTGAAAAACATAACCCATAAAATGCTAGCTGTACCAGGAACCA	0	0	2	1	ATTCCGGGTACAGCGTTTGCA&ATGCTAGCTGTACCAGGAAC	.((((.((((((((....(((&.)))..)))))))).)))).	-22.4	No	Yes	No
103903_1	protein_coding	b3062	ttdB	3207713	3207730	+	AATTCAAGGCGCTACAT	inter	int-1921-1	int-1921-1	3982705	3982722	+	TTGAACTAAAAATTCAA	0	0	1	1	ATTCAAG&TTGAAC	.(((((.&))))).	-2.6	Yes	No	No
1039262_1	protein_coding	b1598	ydgD	1671971	1672023	+	ATTGCTGTAGTGTTGGGTGCAATTAGTTTGACGTCTGCTTTTGTGTTTGCAG	tRNA	b1984	asnW	2058027	2058089	-	AGTCGGTAGAACGGCGGACTGTTAATCCGTATGTCACTGGTTCGAGTCCAGTCAGAGGAGCC	0	0	1	1	TGCTGTAGTGTTGGGTGCAATTAGTTTGACGTCTGCTTTTGTGTTTGCA&GGTAGAACGGCGGACTGTTAATCCGTATGTCACTGGTTCGAGTCCAGTCAGAGGAGCC	.(((.(..(((((((..((((((((((((((((((((...((.(((((.&.)))))))))))))).)))))..........))))))).)..))))).))..).))).	-30	No	Yes	No
1039347_1	tRNA	b1989	asnV	2062273	2062319	+	GTCGGTAGAACGGCGGACTGTTAATCCGTATGTCACTGGTTCGAGT	tRNA	b3276	alaU	3426978	3427024	-	GCTCAGCTGGGAGAGCGCCTGCTTTGCACGCAGGAGGTCTGCGGTT	0	0	1	1	GAACGGCGGACTGTTAATCCGTATGTCACTGGTTCGAGT&GCTCAGCTGGGAGAGCGCCTGCTTTGCACGCAGGAGGTCTGCGGTT	.(((.(((((((.....(((((.(((..((((((.((((&))))))))))...............))).)).)))))))))).)))	-24.4	No	Yes	No
1039702_1	protein_coding	b2584	pka	2720415	2720441	+	AATCGGCTGCCGTCTCCAACACCATC	ncRNA	b4452	gadY	3664916	3664954	+	GTCTGGAGACGGCAGACTATCCTCTTCCCGGTCCCCTA	4.57344e-187	1.15568e-186	8	1	AATCGGCTGCCGTCTCCAACA&GTCTGGAGACGGCAGACTATCCTCTTCCCGGTC	.(((((((((((((((((((.&)).))))))))))))............))))).	-28.4	No	Yes	Yes
1041358_1	ncRNA	b4585	chiX	507216	507288	+	AAGTGACGGCATAATAATAAAAAAATGAAATTCCTCTTTGACGGGCCAATAGCGATATTGGCCATTTTTTTA	protein_coding	b0505	allA	532490	532536	+	GTGCTTATGGCGACGTAATCGAAACGCAGCAACGGGATTTTTTCCA	6.48687e-10	9.43853e-10	1	1	TGAAATTCCTCTTTGACGGGCCAATAGCGATATTGGCCATT&TATGGCGACGTAATCGAAACGCAGCAACGGGATTTTT	.((((((((...(((.(..((......(((((((.(((((.&.))))).).))).)))....)).)))).)))))))).	-18.1	No	Yes	No
1042114_1	antisense_protein_coding	antisense-b0408	antisense-b0408	427826	427843	-	GACTTAGCAGTTATTTT	inter	int-653-1	int-653-1	1216677	1216714	+	TTATTTTTGTCTGTCGCTTTAGACTATACACAGCATA	0	0	1	1	GACTTAGCAGT&TTTGTCTGTCG	(((...((((.&.))))..))).	-4.5	No	No	Yes
1042328_1	protein_coding	b0740	tolB	778917	778985	+	TTCTCAGGGGATGGGATCCGTGCTGAATTTGGTTTCTACAGATGGGCGTTTCAAAGCGCGTCTTCCGG	tRNA	b3799	proM	3982705	3982752	+	TTGAACTAAAAATTCAAAAAGCAGTATTTCGGCGAGTAGCGCAGCTT	0	0	1	1	GGGGATGGGATCCGTGCTGAATTTGGTTTCTACAGATGGGCGTTTCAAA&TTGAACTAAAAATTCAAAAAGCAGTATTTCGGCGAGTAGCGCAGCTT	.(((.((.(...(.(((((((.(((.(((.....(((......(((((.&)))))......)))...))).)))...))))))).)...).)).)))	-15.3	No	Yes	No
104244_1	ncRNA	b4452	gadY	3664879	3664921	+	TTCCCGTGCCAACAGGGAGTGTTATAACGGTTTATTAGTCTG	5UTR	b3708	tnaA	3888649	3888687	+	TATATCTGGCGAATTAATCGGTATAGCAGATGTAATAT	0	0	1	1	AACAGGGAGTGTTATAACGGTTTATTAGTCT&TGGCGAATTAATCGGTATAGCAGATGTA	.(((.....(((((((.(((((.(((.(((.&.))).))).))))).)))))))..))).	-15.6	No	No	Yes
1043176_1	protein_coding	b0268	yagE	282412	282474	+	TTCCTGGGCAGCGGTGGCGAGTTCTCCCAGCTCGGCGCCGAAGAGCGTAAAGCCATTGCCCG	protein_coding	b2597	raiA	2737454	2737511	+	TGAAAGACGCCAACTTCGTCGAAGAAGTTGAAGAAGAGTAGTCCTTTATATTGAGTG	2.17908e-33	3.76907e-33	1	1	TGGGCAGCGGTGGCGAGTTCTCCCAGCTCGGCGCCGAAGAGCGTA&GACGCCAACTTCGTCGAAGAAGTTGAAGAAGAGTAGTCCT	.((((.((.........((((..((((((..((.(((((.((((.&.))))...))))).))..)).)))).))))..)).)))).	-25.2	No	No	Yes
1043325_1	5UTR	b0654	gltJ	686703	686735	-	ACGCTGGGTAACAATCTTCGAGGGTAGCAGTT	protein_coding	b3766	ilvL	3950376	3950419	+	TTATCCCACCGTGCGGGGCTGCACTTGGACGAGGAAAGGCTTA	0	0	1	1	CTGGGTAACAATCTTCGAGGGTAGCAGTT&GGGCTGCACTTGGACGAGGAAAGGCTTA	.(((((.....((((((.((((.((((((&.))))))))))...))))))...)))))	-18	Yes	No	No
1043328_1	tRNA	b0216	aspV	236939	237005	+	GTTCAGTCGGTTAGAATACCTGCCTGTCACGCAGGGGGTCGCGGGTTCGAGTCCCGTCCGTTCCGC	ncRNA	b4585	chiX	507225	507285	+	CATAATAATAAAAAAATGAAATTCCTCTTTGACGGGCCAATAGCGATATTGGCCATTTTT	0	0	1	1	CGGTTAGAATACCTGCCTGTCACGCAGGGGGT&TTCCTCTTTGACGGGCCAATAGCGATATTGGCCA	.((((((.((..((((((((((...((((((.&.)))))).))))))))....))..)).)))))).	-24.8	No	Yes	No
1043345_1	ncRNA	b4452	gadY	3664898	3664969	+	TGTTATAACGGTTTATTAGTCTGGAGACGGCAGACTATCCTCTTCCCGGTCCCCTATGCCGGGTTTTTTTT	protein_coding	b4016	aceK	4218880	4218914	+	TTCGAGATTGCGGAGAGCTTTTTTAACTCCGTGT	0	0	1	1	GACGGCAGACTATCCTCTTCCCGGTCC&AGATTGCGGAGAGCTTTTTTAACTCCGTG	.((((.((......((((((.(((((.&.))))).)))))).........)))))).	-16.1	No	No	Yes
1043716_1	protein_coding	b1641	slyB	1720037	1720107	+	GGCGGTGATGATTCCAACGTTATCGGTGCAATTGGCGGTGCTGTTCTTGGTGGTTTCCTGGGGAATACTG	5UTR	b3321	rpsJ	3453389	3453432	-	AGTTGACAGCAGGTTCAATCTGAACCTCAGTTAGCCGAATTTG	0	0	1	1	ATCGGTGCAATTGGCGGTGCTGTTCTTGGTGG&ACAGCAGGTTCAATCTGAACCTCAGTTAGCCGAA	.(((((..((((((.(((..((..((((.((.&.)).))))..))......))))))))).))))).	-21.9	No	Yes	No
1043804_1,142003_1	5UTR	b1838	pphA	1923100	1923154	-	CAAGAGCCATTTCCCTGGACCGAATACAGGAATCGTGTTCGGTCTCTTTTTATC	ncRNA	b4443	gcvB	2942696	2942832	+	CTTCCTGAGCCGGAACGAAAAGTTTTATCGGAATGCGTGTTCTGGTGAACTTTTGGCTTACGGTTGTGATGTTGTGTTGTTGTGTTTGCAATTGGTCTGCGATTCAGACCATGGTAGCAAAGCTACCTTTTTTCAC	0	0	3	2	AGAGCCATTTCCCTGGACCGAATACAGGAATCGTGTTCGGTCTCT&TGAGCCGGAACGAAAAGTTTTATCGGAATGCGTGTTCTGGTGAACTTTTGGCTTA	.((((((.(((.(((((((((.........((((.(((((.(((.&.)))))))))))).........)))).........))))).)))....)))))).	-28.6	Yes	Yes	Yes
104409_1	protein_coding	b2107	rcnB	2187075	2187121	+	AAGTAGTTTCATTGCTGACTTTAAGCATTTCAAACCAGGGGACACC	ncRNA	b4450	arcZ	3350641	3350663	+	TTTCCCTGGTGTTGGCGCAGTA	0	0	1	1	TTGCTGACTTTAAGCATTTCAAACCAGGGGAC&TTTCCCTGGTGTTGGCGC	.(((((((..............(((((((((.&.)))))))))))))))).	-19.7	No	Yes	Yes
104454_1	protein_coding	b0949	uup	1010629	1010668	+	ATTGTTGATCTCGATCGCGGCAAGCTGGTGACCTATCCA	3UTR	b4484	cpxP	4106339	4106369	+	CATAGACACCATCCCTGTCTTCCCCCACAT	3.4213e-85	6.69463e-85	1	1	CGATCGCGGCAAGCTGGTGACCTATC&CATAGACACCATCCCTGTCTTCC	.((..((((...(.(((((..((((.&.)))).))))).).))))..)).	-12.2	Yes	No	No
1045356_1	inter	int-374	int-374	708262	708284	-	AAAAAATAAAAATTAAAAAAGT	tRNA	b3799	proM	3982705	3982769	+	TTGAACTAAAAATTCAAAAAGCAGTATTTCGGCGAGTAGCGCAGCTTGGTAGCGCAACTGGTTT	1.23576e-22	2.00919e-22	3	1	AAAGT&AGCTTG	.((((&.)))).	-1.8	Yes	No	No
1045388_1	ncRNA	b4704	arrS	3657983	3658054	-	GTAATCCGATTTAAATATCGAGTCTCCTTGTTTCGACTTAAGCTGGCAATTGGATTGCCAGCTTTCTTTTA	protein_coding	b3516	gadX	3664909	3665006	-	GCGGAAGGAATAAGATTATAGAGTTTTACTCAGACATAAAAAAAACCCGGCATAGGGGACCGGGAAGAGGATAGTCTGCCGTCTCCAGACTAATAAA	0	0	5	1	AATCCGATTTAAATATCGAGTCTCCTTGTTTCGACTTAAGCTGGCAATTGGATTGCCAGCTTTCTT&CGGAAGGAATAAGATTATAGAGTTTTACTCAGACATAAAAAAAACCCGGCATAGGGGACCGGGAAGAGGATA	.((((..(((.....(((.((((((((((((.((...(((((........((((.....((((((.&.)))))).....))))....)))))...))))))).................)))))))))))))..)))).	-27.1	No	Yes	Yes
1045752_1	ncRNA	b4585	chiX	507215	507288	+	AAAGTGACGGCATAATAATAAAAAAATGAAATTCCTCTTTGACGGGCCAATAGCGATATTGGCCATTTTTTTA	ncRNA	b1954	dsrA	2025239	2025279	-	AAGTGCTTCTTGCTTAAGCAAGTTTCATCCCGACCCCCTC	0	0	3	1	AATGAAATTCCTCTTTGACGGGCCAATAGCGA&GTGCTTCTTGCTTAAGCAAGTTTCATC	.((((((((...(((....((((....((((.&.))))....)))))))..)))))))).	-11.4	No	Yes	Yes
1046556_1	ncRNA	b4698	mgrR	1622832	1622852	-	CAAGCATTCACCGCCGGTTT	protein_coding	b3737	atpE	3921004	3921030	-	TTTATCGTTATGGGTCTGGTGGATGC	2.62207e-164	6.42044e-164	2	1	AGCATTCACCGCCGGTT&TATGGGTCTGGTGGATGC	.((((((((((((.((.&.)).)))..)))))))))	-18.4	No	No	Yes
1047338_1	5UTR	b1838	pphA	1923104	1923150	-	AGCCATTTCCCTGGACCGAATACAGGAATCGTGTTCGGTCTCTTTT	protein_coding	b3709	tnaB	3891180	3891225	+	ATTGATAACTCCCACGGCGGGCGTTTCAAAACCGTGCTGTTAACC	2.63267e-284	7.4475e-284	1	1	AGCCATTTCCCTGGA&CCCACGGCGGGCG	.(((....((.(((.&.))).))..))).	-10.6	Yes	No	No
1047580_1	ncRNA	b4432	ryeA	1923084	1923156	+	CTTCTGGCTTTTAACAGATAAAAAGAGACCGAACACGATTCCTGTATTCGGTCCAGGGAAATGGCTCTTGGG	protein_coding	b3600	mtlD	3774627	3774657	+	ATTGGTGATGATGTCGTTGATCTGATTGCT	1.56938e-55	2.98485e-55	1	1	TGTATTCGGTCCAGGGAAATGGCTC&TGGTGATGATGTCGTTGATCTGATTGCT	.(((.((((..(((.((.((.(((.&.))).))....)).)))..)))).))).	-12.8	No	Yes	No
1048002_1	protein_coding	b1825	yebO	1908477	1908515	-	ATTGCGTCTTTGGTTGTATCGGTGGTGGTTCTTCTTAT	ncRNA	b4442	micA	2814799	2814876	+	ATGAAAGACGCGCATTTGTTATCATCATCCCTGAATTCAGAGATGAAATTTTGGCCACTCACGAGTGGCCTTTTTCT	0	0	1	1	GCGTCTTTGGTTGTATCGGTGGTGGTT&TATCATCATCCCTGAATTCAGAGATGA	.(((((((((...((..(((((((((.&.)))))))))..))...))))))))).	-19.9	Yes	No	No
1048362_1	ncRNA	b4585	chiX	507215	507288	+	AAAGTGACGGCATAATAATAAAAAAATGAAATTCCTCTTTGACGGGCCAATAGCGATATTGGCCATTTTTTTA	antisense_protein_coding	antisense-b1605	antisense-b1605	1680739	1680776	-	ATTGGACCAGAGGCGTACAATAACCATAAGCCATAAA	2.5832e-13	3.89295e-13	1	1	CGGCATAATAATAAAAAAATGAAATTCCTCTTTGACGGGCCAATA&ATTGGACCAGAGGCGTACAATAACCATAAGCCA	.(((..............(((.....(((((.....((.(((((.&))))).)))))))))).............))).	-13.8	Yes	No	No
1048399_1	antisense_protein_coding	antisense-b1726	antisense-b1726	1809015	1809082	+	TACCAGAATAGATTCAAAAAAGGCGTATTCGCCTGCATCATATCGATCATGACATGAGTAAAGTCGA	tRNA	b3976	thrU	4175408	4175434	+	GAGCAACTGACTTGTAATCAGTAGGT	0.000644312	0.000835301	1	1	CGCCTGCATCATATCGATCATGACATGAGTAAAGTCGA&CTGACTTGTAATCAGTAGGT	.((((((..................(((...((((((.&.))))))....)))))))))	-13	No	Yes	No
1048856_1	tRNA	b0216	aspV	236966	237006	+	CACGCAGGGGGTCGCGGGTTCGAGTCCCGTCCGTTCCGCC	ncRNA	b4443	gcvB	2942841	2942882	+	ATTTACCCTGTCTGTCCATAGTGATTAATGTAGCACCGCCT	0	0	1	1	CAGGGGGTCGCGGGTT&TACCCTGTCTGTCCATAGTGATTAATGTAGCACCGCCT	.(((.(((.((((((.&.))))........................))))).)))	-13.5	No	Yes	No
1049350_1	ncRNA	b4432	ryeA	1923075	1923136	+	AAGGAAATGCTTCTGGCTTTTAACAGATAAAAAGAGACCGAACACGATTCCTGTATTCGGT	protein_coding	b2150	mglB	2239564	2239624	-	TTGAAGCGCTGAAAGCACACAACAAGTCCAGCATTCCGGTGTTTGGCGTCGATGCGCTGC	3.74133e-78	7.68226e-78	1	1	ACAGATAAAAAGAGACCGAACACGATTCCTGTATTCGGT&CGCTGAAAGCACACAACAAGTCCAGCATTCCGGTGTTTGGCGTCGATGCGCTGC	.(((.......((..((((((((......(((.((((((&.)))))).))).....................))))))))..))......))).	-20.8	No	No	Yes
104935_1	protein_coding	b3707	tnaC	3888479	3888514	+	CACGCAGGGGGTCGCGGGTTCGAGTCCCGTCCGTTCCGCC	tRNA	b3797	hisR	3982500	3982520	+	ATTTACCCTGTCTGTCCATAGTGATTAATGTAGCACCGCCT	0	0	1	1	CAGGGGGTCGCGGGTT&TACCCTGTCTGTCCATAGTGATTAATGTAGCACCGCCT	.(((.(((.((((((.&.))))........................))))).)))	-13.5	Yes	No	No
1049555_1	rRNA	b2589	rrlG	2728337	2728360	-	ATTTAGGTAGCGCCTCGTGAATT	5UTR	b3637	rpmB	3811709	3811732	-	GACGAGGCGCCAATACCCCATAC	1.0613e-26	1.76609e-26	2	1	AGGTAGCGCCTCGTG&GACGAGGCGCCAATACCC	.(((((((((((((.&.)))))))))...)))).	-22.3	Yes	No	No
1049916_1	ncRNA	b4408	csrB	2924197	2924263	-	CAAGGCCAGAGGAAAAGTTGTCAAGGATGAGCAGGGAGCAACAAAAGTAGCTGGAATGCTGCGAAA	tRNA	b3976	thrU	4175405	4175434	+	GTAGAGCAACTGACTTGTAATCAGTAGGT	0	0	2	1	GGATGAGCAGGGAGCAACAAAAGTAGCTGGAATGCTGCG&GTAGAGCAACTGACTTGTAATCA	.(((..(((((..........(((.(((......((((.&))))))).)))..))))).))).	-12.1	No	No	Yes
1049936_1	ncRNA	b4408	csrB	2924181	2924344	-	AGGCCAGGGACACTTCAGGATGAAGTATCACATCGGGGTGGTGTGAGCAGGAAGCAATAGTTCAGGATGAACGATTGGCCGCAAGGCCAGAGGAAAAGTTGTCAAGGATGAGCAGGGAGCAACAAAAGTAGCTGGAATGCTGCGAAACGAACCGGGAGCGCTG	inter	int-1767	int-1767	3657983	3658055	-	TGTAATCCGATTTAAATATCGAGTCTCCTTGTTTCGACTTAAGCTGGCAATTGGATTGCCAGCTTTCTTTTA	0	0	10	1	GTGAGCAGGAAGCAATAGTTCAGGATGAACGATTGGCCGCAAGGCCAGAGGAAAAGTTGTCAAGGATGAGCAGGGAGCAACAAAAGTAGCTGGAATGCTGCGAAACGAACCGGGAGCG&TGTAATCCGATTTAAATATCGAGTCTCCTTGTTTCGACTTAAGCTGGCAATTGGATTGCCAGCTTTCTTTTA	.((((.(((((((....................((((..(((.(((((.....((((((........((((((((((...................(((.(((...(((.((((.((.&.))..)))).))).....))))))))))))))))))))))...)))))..)))....)))))))))))))))	-42.7	Yes	Yes	Yes
1050796_1	protein_coding	b3300	secY	3443138	3443172	-	ATTTGCAGCCTGGGCAACCGCTTTATGTGTTACT	ncRNA	b4704	arrS	3657984	3658041	-	AATATCGAGTCTCCTTGTTTCGACTTAAGCTGGCAATTGGATTGCCAGCTTTCTTTT	0	0	1	1	CAGCCTGGGCAACCGCTTTATGTGTTACT&TGTTTCGACTTAAGCTGGCAATTGGATTGCCAGCTT	.(((...(((((((((((....((..((.&.))..))....))))........)).))))).))).	-14.5	Yes	No	No
1050932_1	5UTR	b3310	rplN	3448167	3448213	-	ATGGGGATTTTTAACGACCTGATTTTCGGGTCTCAGTAGTAGTTGA	tRNA	b3799	proM	3982705	3982748	+	TTGAACTAAAAATTCAAAAAGCAGTATTTCGGCGAGTAGCGCA	0	0	1	1	GGGGATTTTTAACGACCTGATTTTCGGGTCTCAGTAGTA&AACTAAAAATTCAAAAAGCAGTATTTCGGCGAGTAGCGCA	.(.(...(((..(((.(((.((((.((((.....((((.&.))))...)))).)))).)))....)))..)))...).).	-10.2	Yes	No	No
1050936_1	antisense_ncRNA	antisense-b4452	antisense-b4452	3664911	3664985	-	AGTTTTACTCAGACATAAAAAAAACCCGGCATAGGGGACCGGGAAGAGGATAGTCTGCCGTCTCCAGACTAATA	tRNA	b3799	proM	3982792	3982847	+	AATCCTCTCTCGCCGACCAATTTTGAACCCCGCTTCGGCGGGGTTTTTTGTTTTC	0	0	2	1	CAGACATAAAAAAAACCCGGCATAGGGGACCGGGAAGAGGATA&AATCCTCTCTCGCCGACCAATTTTGAACCCCGCTTCGGCGGGGTTTTTTGTTTT	.(((((....((((((((.((...((((..((((((((((((.&.))))))).)).)))............))))......)).))))))))))))).	-35	Yes	No	Yes
1050950_1	inter	int-1332	int-1332	2729211	2729298	-	ATTTGCTCTTTAAAAATCTGGATCAAGCTGAAAATTGAAACACTGAACAATGAAAGTTGTTCGTGAGTCTCTCAAATTTTCGCAACT	inter	int-3967	int-3967	3423817	3423872	-	CGAAGCTGTTTTGGCGGATGAGAGAAGATTTTCAGCCTGATACAGATTAAATCAG	2.0549e-27	3.44012e-27	2	1	AAATCTGGATCAAGCTGAAAATTGAAACACTGAACAATGAAAGTTGTTCGTGAGTCTCTCAAATTTTCGCA&GGCGGATGAGAGAAGATTTTCAGCCTGATACAGATTA	.((((((..(((.(((((((((.......((.......................(((((((....(((((.&.))))))))))))))))))))))).)))..)))))).	-31.3	Yes	No	No
1051142_1	ncRNA	b4585	chiX	507219	507265	+	TGACGGCATAATAATAAAAAAATGAAATTCCTCTTTGACGGGCCAA	protein_coding	b1761	gdhA	1842969	1842990	+	ATTTGGCGGCAGTCTTATTCG	1.35138e-107	3.00775e-107	1	1	TGACGGGCCAA&TTTGGCGGCAGTCT	.(((..(((((&.)))))....))).	-9.9	No	Yes	No
1051320_1	protein_coding	b3737	atpE	3921179	3921228	-	ACACTACTACGTTTTAACTGAAACAAACTGGAGACTGTCATGGAAAACC	5UTR	b3894	fdoG	4085825	4085865	-	GAATGTAAATGGGACGTGACAATGTCGAAACAAGGAGCAA	0	0	1	1	CTGGAGACTGTCATGG&ACGTGACAATGTCGAA	.(.((.(.(((((((.&.))))))).).)).).	-12.2	No	No	Yes
1051407_1	ncRNA	b4450	arcZ	3350663	3350680	+	TTCGCGCACCCCGGTCT	tRNA	b4163	glyV	4392393	4392415	+	CCAAGGTCGGGGTCGCGAGTTC	0	0	1	1	TTCGCGCACCCCGGTCT&AAGGTCGGGGTCGCGAGT	((((((.((((((((((&.)))))))))))))))).	-23.9	No	No	Yes
1051428_1	protein_coding	b0348	mhpB	370982	371029	+	TTTGGGATAACCAGTTCATGACTTTGCTGGAGCAGGGACGCATACAG	ncRNA	b4432	ryeA	1923075	1923143	+	AAGGAAATGCTTCTGGCTTTTAACAGATAAAAAGAGACCGAACACGATTCCTGTATTCGGTCCAGGGA	2.22945e-231	5.95023e-231	1	1	TGGGATAACCAGTTCATGACTTTGCTGGAGCAGGGACGCATA&AATGCTTCTGGCTTTTAACAGATAAAAAGAGACCGAACACGATTCCT	.(((((.....((((....((((.(((((((.((((.((((.&.)))))))).))))....)))....)))).....))))...))))).	-18.8	No	Yes	No
105230_20	protein_coding	b2330	prmB	2447478	2447518	-	ATAAAGATTAAGTAAACACGCAAACACAACAATAACGGAG	ncRNA	b4443	gcvB	2942696	2942869	+	CTTCCTGAGCCGGAACGAAAAGTTTTATCGGAATGCGTGTTCTGGTGAACTTTTGGCTTACGGTTGTGATGTTGTGTTGTTGTGTTTGCAATTGGTCTGCGATTCAGACCATGGTAGCAAAGCTACCTTTTTTCACTTCCTGTACATTTACCCTGTCTGTCCATAGTGATTAA	0	0	34	1	AAGATTAAGTAAACACGCAAACACAACAATAACGGA&ACGGTTGTGATGTTGTGTTGTTGTGTTTGCAATTGGTCTG	.((((((((((((((((..((((((((((((((.(.&.).)))))..)))))))))..)))))))))..))))))).	-31	Yes	Yes	Yes
1052424_1	5UTR	b0401	brnQ	419512	419544	+	AATATACCGCTGTATCATCCCCAGGGATTGGC	rRNA	b3278	rrsD	3427865	3427886	-	GACCGCCTGGGGAGTACGGCC	3.63775e-47	6.73441e-47	1	1	CGCTGTATCATCCCCAGGGATTGGC&ACCGCCTGGGGAGTACGGCC	.(((((((..((((((((...(((.&.)))))))))))))))))).	-26.9	No	No	Yes
1052425_1	5UTR	b0401	brnQ	419512	419536	+	AATATACCGCTGTATCATCCCCAG	rRNA	b3968	rrsB	4167535	4167559	+	ACCGCCTGGGGAGTACGGCCGCAA	6.03364e-39	1.07381e-38	1	1	CGCTGTATCATCCCCAG&CCTGGGGAGTACGGCC	.(((((((..(((((((&.)))))))))))))).	-21.8	No	No	Yes
10531_354	antisense_protein_coding	antisense-b0099	antisense-b0099	111372	111401	-	CATTGGCTGGCGGAAAATCATCGGCATTA	3UTR	b4059	ssb	4274707	4274725	+	AAGCATCTGCCAGCCATA	3.14154e-29	4.89061e-29	12	1	TTGGCTGGCGGAA&ATCTGCCAGCCAT	.(((((((((((.&.))))))))))).	-22.1	Yes	No	No
105350_17	protein_coding	b3844	fre	4027049	4027107	+	GGCGTGGGCGTACTGGCACCGTGTTAACGGCGGTATTGCAGGATCACGGTACGCTGGC	rRNA	b3851	rrsA	4036567	4036585	+	CGTGAGACAGGTGCTGCA	8.8491e-05	0.000117254	1	1	GGCGGTATTGCAGGATCACGG&CGTGAGACAGGTGCTGCA	.((((((((...(..(((((.&)))))..).)))))))).	-18.1	Yes	No	No
1053801_1	ncRNA	b4444	omrA	2976100	2976167	-	ATTATTCGGTACGCTCTTCGTACCCTGTCTCTTGCACCAACCTGCGCGGATGCGCAGGTTTTTTTTC	antisense_ncRNA	antisense-b4704	antisense-b4704	3657981	3658036	+	GTTAAAAGAAAGCTGGCAATCCAATTGCCAGCTTAAGTCGAAACAAGGAGACTCG	0	0	1	1	TGTCTCTTGCACCAACCTGCGCGGATGCGCAGGTTTTTTTTC&TAAAAGAAAGCTGGCAATCCAATTGCCAGCTTAAGTCGAAACAAGGAGACT	.(((((((......(((((.((((((((.(((.((((((((.&.)))))))).)))))).)))....))))).....)).......))))))).	-26.8	No	Yes	No
105381_1	protein_coding	b0831	gsiC	871477	871499	+	AGCACTACATTTTACCCTCCCT	ncRNA	b3864	spf	4049967	4049987	+	TTTTAGCCGCCCCAGTCAGT	0	0	2	1	AGCACTAC&TTAGCCGCC	.((.(((.&.)))..)).	-2.2	Yes	No	No
1054096_1	protein_coding	b0094	ftsA	104084	104121	+	TCATTGGCGTGGGCAGCTGCCCGTCGCGTGGTATGGA	ncRNA	b4704	arrS	3657986	3658041	-	AATATCGAGTCTCCTTGTTTCGACTTAAGCTGGCAATTGGATTGCCAGCTTTCTT	7.51096e-188	1.89989e-187	1	1	ATTGGCGTGGGCAGCTGCCCGTCGCGTGGTATG&AATATCGAGTCTCCTTGTTTCGACTTAAGCTGGCAATTGGATTGCCAGC	.((((((..(.(((((....(((((.((((((.&.)))))).)...........))))...))))).)........)))))).	-21.1	No	Yes	No
10551_64	antisense_pseudogene	antisense-b4628	antisense-b4628	266876	266897	+	GCACACTCAGCGTTTCCCCTG	ncRNA	b4450	arcZ	3350642	3350660	+	TTCCCTGGTGTTGGCGCA	0	0	5	1	GCACACTCAGC&CCTGGTGTTGGCG	((((((.(((.&.)))))))..)).	-8.6	No	No	Yes
1055522_1	protein_coding	b1598	ydgD	1671972	1672040	+	TTGCTGTAGTGTTGGGTGCAATTAGTTTGACGTCTGCTTTTGTGTTTGCAGATAAACCAGACGTTGCC	ncRNA	b1954	dsrA	2025240	2025261	-	CAAGTTTCATCCCGACCCCCT	0	0	1	1	TGTTGGGTGCAATTA&AAGTTTCATCCCGACC	.((((((((.((((.&.)))).)).)))))).	-10.9	No	No	Yes
10556_372	5UTR	b1237	hns	1292941	1292959	-	CAACAAACCACCCCAATA	inter	int-3011	int-3011	1647062	1647102	-	TTTTCGGGTGGTTTGTTACTTGTTTTACCGGGGATATGCC	7.5191e-213	1.86654e-212	12	1	CAACAAACCACCCC&CGGGTGGTTTGTTA	.((((((((((((.&.)))))))))))).	-20.7	Yes	Yes	Yes
105573_1	protein_coding	b3729	glmS	3913603	3913642	-	GCAACGTGATGTAGCAGAAATCCTTCTTGAAGGTTTACG	3UTR	b4484	cpxP	4106330	4106371	+	TTTCCTTGCCATAGACACCATCCCTGTCTTCCCCCACATGC	0	0	1	1	GCAACGTGATGTAGCAGAAATCCTTCTTGAAGGT&TCCTTGCCATAGACACCATCCCTGTCTTCCCCCACATGC	(((..(((....(((((.......(((..((((.&.)))).....)))........))).)).....))).)))	-9.1	No	No	Yes
1055928_1	tRNA	b0206	aspU	228985	229025	+	AGTCCCGTCCGTTCCGCCACTTATTAAGAAGCCTCGAGTT	rRNA	b4007	rrsE	4208214	4208264	+	GTAACAGGAAGAAGCTTGCTTCTTTGCTGACGAGTGGCGGACGGGTGAGT	0	0	3	1	CCGTCCGTTCCGCCACTTATTAAGAAGCCTCGAGTT&AAGCTTGCTTCTTTGCTGACGAGTGGCGGACGGGTGA	.((((((.((((((((((.(((((((((...(((((&.)))))))))))....))).)))))))))))))))).	-34.9	Yes	No	Yes
1055942_1	ncRNA	b4585	chiX	507213	507288	+	TTAAAGTGACGGCATAATAATAAAAAAATGAAATTCCTCTTTGACGGGCCAATAGCGATATTGGCCATTTTTTTA	tRNA	b1977	asnT	2044549	2044621	+	CCTCTGTAGTTCAGTCGGTAGAACGGCGGACTGTTAATCCGTATGTCACTGGTTCGAGTCCAGTCAGAGGAG	0	0	3	1	TTCCTCTTTGACGGGCCAATAGCGATATTGGCCATTTTT&TAGAACGGCGGACTGTTAATCCGTATGTCACTGGTTCGAGTCCAGTCAGAGGAG	.(((((..(((((((((..(((.((((((.(((.((((.&.)))).))).)).............)))).)))....).)))).))))))))).	-25.6	Yes	No	Yes
105634_16	protein_coding	b1824	yobF	1907587	1907622	-	ATTTCGGGTTAAACGAGGTACAGTTCTGTTTATGT	ncRNA	b4450	arcZ	3350587	3350624	+	AAAACAGTGCTGTGCCCTTGTAACTCATCATAATAAT	0	0	8	1	CGGGTTAAACGAGGTACAGTTCTGTTTA&AAAACAGTGCTGTGCCCTTGTAACTCA	.(((((..((((((((((((.((((((.&.)))))).)))))))).))))))))).	-27.2	Yes	No	No
105665_1	protein_coding	b0890	ftsK	936569	936611	+	TTGTGGTGTTGGTTGACGAATTTGCCGACCTGATGATGACGG	ncRNA	b3864	spf	4049967	4049988	+	TTTTAGCCGCCCCAGTCAGTA	1.17041e-67	2.15001e-67	1	1	GTGGTGTTGGTTGAC&TTTAGCCGCCCCAG	.(((.(.(((((((.&.))))))).)))).	-10.2	Yes	No	No
105793_1	5UTR	b1243	oppA	1300878	1300903	+	TTGGCGAGTAAGAACCGCATTTGGT	protein_coding	b2688	gshA	2816436	2816462	-	ATTTTGACAGGCGGGAGGTCAATTTG	1.89666e-68	3.49469e-68	1	1	TTGGCGAGTAAGAACCGCA&GGCGGGAGGTCAAT	(((((.........((((.&.))))...))))).	-9.8	No	No	Yes
105801_1	protein_coding	b2093	gatB	2174512	2174555	-	GATTATTGTCGCTTGCGGAGGCGCGGTTGCGACCTCTACGATG	protein_coding	b2688	gshA	2816436	2816462	-	ATTTTGACAGGCGGGAGGTCAATTTG	6.53807e-79	1.24791e-78	1	1	GATTATTGTCGCTTGCGGAGG&ATTTTGACAGGCGGGAGGTCA	(((..((.((((((((((((.&.))))).))))))).))))).	-14.5	No	No	Yes
105808_1	protein_coding	b2688	gshA	2816436	2816462	-	ATTTTGACAGGCGGGAGGTCAATTTG	tRNA	b3171	metY	3318239	3318287	-	CGGGGTGGAGCAGCCTGGTAGCTCGTCGGGCTCATAACCCGAAGATCG	8.24609e-71	1.52495e-70	1	1	TTTTGACAGGCGGGAGGTC&AGCCTGGTAGCTCGTCGGGC	.((((((.(((...((((.&.))))....))).)))))).	-14	No	No	Yes
105818_1	5UTR	b0155	clcA	174996	175032	+	GAGTATAAAAGTTTTGTGCATTTGAAACATTACGCT	protein_coding	b2688	gshA	2816436	2816462	-	ATTTTGACAGGCGGGAGGTCAATTTG	1.44219e-08	1.89069e-08	1	1	TTTGAAACATTACGCT&AGGCGGGAGGTCAAT	.((((....(..((((&.))))..)..)))).	-6.8	No	No	Yes
1058234_1	tRNA	b1989	asnV	2062280	2062334	+	GAACGGCGGACTGTTAATCCGTATGTCACTGGTTCGAGTCCAGTCAGAGGAGCC	ncRNA	b4408	csrB	2924226	2924290	-	CAATAGTTCAGGATGAACGATTGGCCGCAAGGCCAGAGGAAAAGTTGTCAAGGATGAGCAGGGA	0	0	1	1	ACTGTTAATCCGTATGTCACTGGTTCGAGTCCAGTCA&CGATTGGCCGCAAGGCCAGAGGAAAAGTTGTCAAGGATGAGCAGG	.(((((.((((...((.((((((((((.(.((((((.&.)))))))))...)))))).........)).)).)))).))))).	-25.8	No	No	Yes
1059307_1	protein_coding	b2091	gatD	2172616	2172664	-	CGGTGTTGATGATTTACACCCTGGCGATGCGGTTGCCTGTGTGCCGTT	rRNA	b3275	rrlD	3425329	3425392	-	AATATTCCTGTACTTGGTGTTACTGCGAAGGGGGGACGGAGAAGGCTATGTTGGCCGGGCGAC	2.17152e-117	4.93557e-117	1	1	CCCTGGCGATGCGGTTGCCTGTGTGCCGTT&GGACGGAGAAGGCTATGTTGGCCGGGC	.((((((.(.(((...((((.....(((((&.)))))...))))..)))).)))))).	-25.8	No	No	Yes
105949_1	ncRNA	b4698	mgrR	1622886	1622914	-	GATTCGTTATCAGTGCAGGAAAATGCCT	ncRNA	b3864	spf	4049967	4049996	+	TTTTAGCCGCCCCAGTCAGTAATGACTGG	0	0	1	1	CGTTATCAGTGCAGGA&CCCAGTCAGTAATGACT	.(((((.(.(((.((.&.)).).)).).))))).	-7.3	Yes	No	No
1059580_1	ncRNA	b4585	chiX	507229	507287	+	ATAATAAAAAAATGAAATTCCTCTTTGACGGGCCAATAGCGATATTGGCCATTTTTTT	tRNA	b3852	ileT	4037105	4037152	+	GATTGTCTGATGAAAATGAGCAGTAAAACCTCTACAGGCTTGTAGCT	0	0	1	1	GACGGGCCAATAGCGATATTGGCCATTTTTT&TGAAAATGAGCAGTAAAACCTCTACAGGCTTGTA	.(((((((..(((.(.(((((..(((((((.&.)))))))..)))))....).)))..))))))).	-19.7	No	No	Yes
1059987_1	inter	int-1038	int-1038	2001912	2001950	-	GTCAGCAACGTGCTTCCCCGCCACCGGCGGGGTTTTTT	rRNA	b4007	rrsE	4209320	4209362	+	GAGGAAGGTGGGGATGACGTCAAGTCATCATGGCCCTTACGA	4.81622e-59	9.27766e-59	1	1	GTCAGCAACGTGCTTCCCCGCCACCG&AGGAAGGTGGGGATGACGTCAAGTCATCATGGCC	((((((.((((.(.((((((((.((.&.))..)))))))).)))))...)).....)))).	-23.6	No	Yes	No
1060450_1	rRNA	b0204	rrlH	228032	228053	+	CGGAGGAGCACGAAGGTTGGC	ncRNA	b4433	sdsR	1923154	1923206	-	GCAAGGCAACTAAGCCTGCATTAATGCCAACTTTTAGCGCACGGCTCTCTCC	0	0	1	1	CGGAGGAGCACGAAGGTTGGC&TGCCAACTTTTAGCGCACGGCTCTCTCC	.((((((((.(((((((((((&.))))))))).......)))))).))))	-23.7	No	No	Yes
1060707_1	rRNA	b3758	rrlC	3944564	3944619	+	GAGCACTGTTTCGGCAAGGGGGTCATCCCGACTTACCAACCCGATGCAAACTGCG	ncRNA	b3864	spf	4049949	4049986	+	ATCGGATTTGGCTGAATATTTTAGCCGCCCCAGTCAG	0	0	1	1	CGGCAAGGGGGTCATCCCGACTTACCAACCCGATG&ATCGGATTTGGCTGAATATTTTAGCCGCCCCAGTCA	.(((..((((((............((((.(((((.&)))))..))))............))).)))..))).	-20.7	Yes	No	No
1060753_1	protein_coding	b0631	ybeD	662506	662576	-	GCGTTACCTGAGCTGGTTGATCAGGTGGTTGAAGTGGTACAGCGCCATGCGCCAGGTGACTACACCCCAA	ncRNA	b4433	sdsR	1923106	1923168	-	GCACGGCTCTCTCCCAAGAGCCATTTCCCTGGACCGAATACAGGAATCGTGTTCGGTCTCTT	0	0	1	1	GCGTTACCTGAGCTGGTTGATCAGGTGGTTGAAGTGGTACAGCGCCATGCG&GCACGGCTCTCTCCCAAGAGCCATTTCCCTGGACCGAATACAGGAATCGTG	(((...(((((..(((((...(((((((((....(((...((.(((.(((.&))).))).))...)))..)))))....)))))))))..).))))...))).	-35	No	No	Yes
1061095_1	ncRNA	b4585	chiX	507215	507286	+	AAAGTGACGGCATAATAATAAAAAAATGAAATTCCTCTTTGACGGGCCAATAGCGATATTGGCCATTTTTT	5UTR	b2230	yfaA	2336712	2336764	-	ATCTCCCTTGTTTGAATTGAAAAGTCCAGGCTGCAAAGTCTGGGCTTTTGTC	4.38788e-220	1.15873e-219	1	1	AATGAAATTCCTCTTTGACGGGCCAATAGCGATATTGGCCATTTTTT&TGAAAAGTCCAGGCTGCAAAGTCTGGGCTTTTGTC	.((((((.(((.(((((.(.((((...........(((..(((((((&.))))))))))))))))))))...))).)))))).	-15.2	No	Yes	No
1061153_1	tRNA	b1909	leuZ	1991784	1991835	-	CAAGTCCCGCTCCGGGTACCATGGGAAAGATAAGAATAAAATCAAAGCAAT	protein_coding	b3057	bacA	3203716	3203762	-	TATGCGCTGGTCGTTGGCGGTTTGTTGCTGATTGCCGCCGAATGCC	1.10477e-22	1.79738e-22	1	1	CAAGTCCCGCTCCGGGTACCATGGGA&GCGCTGGTCGTTGGCGGTTTGTTGC	(((...(((((..(.(.((((.(.(.&.).)))))).).)))))....))).	-13.8	No	Yes	No
1061258_1	ncRNA	b4445	omrB	2976360	2976385	-	CCCAGAGGTATTGATAGGTGAAGTC	protein_coding	b4069	acs	4286564	4286624	-	GCGGAAGAGATGAACGCCGAAGATCCGCTGTTTATTCTCTACACCTCCGGTTCTACCGGT	4.44718e-05	5.93986e-05	1	1	CCCAGAGGTATTGATAGGTGAAGTC&AGATGAACGCCGAAGATCCGCTGTTTATTCTCTACACCTCCGGT	.((.((((((((....((((..(((&.)))...))))...)))..................))))).)).	-13.2	No	Yes	No
1061406_1	protein_coding	b0440	hupB	461496	461561	+	TCTCTAAAGCTGCGGCTGGCCGTGCGTTAGATGCTATTATTGCTTCCGTAACTGAATCTCTGAAA	protein_coding	b4679	yohP	2228966	2229042	+	AATAAAGGAACGCCAATGAAAATTATACTCTGGGCTGTATTGATTATTTTCCTGATTGGGCTACTGGTGGTGACTG	0	0	1	1	AGCTGCGGCTGGCCGTGCGTTAGATGCTATTATTGCTTCCG&GGGCTGTATTGATTATTTTCCTGATTGGGCTACTGGTGGTG	.(((((.(.(((((....(((((.....((((.(((..((.&.))..))).)))).......)))))..))))).).))))).	-21.2	No	Yes	No
1061466_1	protein_coding	b0440	hupB	461496	461551	+	TCTCTAAAGCTGCGGCTGGCCGTGCGTTAGATGCTATTATTGCTTCCGTAACTGA	protein_coding	b1656	sodB	1735931	1735982	+	ATTCGTAGCGAAAAATCTCGCTGCATAATAACTGATGGCAAATGCAGCATT	1.65143e-33	2.85839e-33	1	1	AGCTGCGGCTGGCCGTGCGTTAGATGCTATTATTGCTTCCGTAACT&CGTAGCGAAAAATCTCGCTGCATAATAACTGATGGCAAATGCAGCA	.((((((....(((((..((((.((((............(((.((.&.)).)))............))))..))))..)))))...)))))).	-29.3	No	Yes	No
1061550_1	ncRNA	b4585	chiX	507249	507287	+	CTCTTTGACGGGCCAATAGCGATATTGGCCATTTTTTT	5UTR	b1919	dcyD	1999542	1999559	-	TTTCACTAGCGCCTTTT	7.93681e-266	2.19153e-265	1	1	CGGGCCAATAGCGAT&TTCACTAGCGCCTT	.((((...(((.((.&.)).)))..)))).	-9.1	Yes	No	No
1061563_1	5UTR	b2573	rpoE	2710048	2710077	-	TTGCAGCTAATGGAGTGGCGTTTCGATAG	5UTR	b3544	dppA	3707729	3707784	-	GCAAAAAACAAAAAAGGTCAGGCAGCGACAACCCACTGCAAAGGGTTAAAACAAC	0	0	1	1	TTGCAGCTAATGGAGTGGCGTTTCGATA&GGTCAGGCAGCGACAACCCACTGCAAA	((((((....(((.((.((((((.(((.&.))))))).)).))...))))))))).	-17.7	Yes	No	No
1061610_1,522090_1	ncRNA	b4445	omrB	2976348	2976385	-	CCCAGAGGTATTGATAGGTGAAGTCAACTTCGGGTTG	5UTR	b3544	dppA	3707708	3707803	-	ATAACGTTGACCCGACCGGGCAAAAAACAAAAAAGGTCAGGCAGCGACAACCCACTGCAAAGGGTTAAAACAACAAACATCACAATTGGAGCAGA	0	0	1	2	CCCAGAGGTATTGATAGGTGAAGTCAACTTCGGGTTG&TGACCCGACCGGGCAAAAAACAAAAAAGGTCAGGCAGCGACAACCCACTGCAAAGGGT	(((....(((.((....(((..(((.((((((((((.&.)))))))...................)))..)))..).))....)).)))...))).	-17.4	No	Yes	Yes
1061639_1,28475_79	inter	int-2339-1	int-2339-1	225310	225377	+	TACCTTAAAGAAGCGTACTTTGCAGTGCTCACACAGATTGTCTGATGAAAATGAGCAGTAAAACCTC	3UTR	b3850	hemG	4035375	4035469	+	CGAAGCGGCACTGCTCTTTAACAATTTATCAGACAATCTGTGTGGGCACTCGAAGATACGGATTCTTAACGTCGCAAGACGAAAAATGAATACC	5.01071e-99	1.01588e-98	27	2	AAAGAAGCGTACTTTGCAGTGCTCACACAGATTGTCTGATGAAAATGAGCAGTA&CACTGCTCTTTAACAATTTATCAGACAATCTGTGTGGGCACTCGAAGATACGGATTCTTA	.(((((.(((((((((.((((((((((((((((((((((((((((.(((((((.&.))))))).)).....))))))))))))))))))))))))))))))).))))..))))).	-67.3	Yes	Yes	No
1062205_1	protein_coding	b2315	folC	2431676	2431749	-	GCTGGTGTGTGGTTCTTTCCACACGGTCGCACATGTCATGGAAGTGATTGACGCGAGGAGAAGCGGTGGCAAG	ncRNA	b4704	arrS	3657993	3658052	-	AATCCGATTTAAATATCGAGTCTCCTTGTTTCGACTTAAGCTGGCAATTGGATTGCCAG	6.10712e-219	1.60877e-218	1	1	GCTGGTGTGTGGTTCTTTCCACACGGTCGCACATGTCATGGAAGTGATTGACGCGAGGAGAAGCGGTGG&ATATCGAGTCTCCTTGTTTCGACTTAAGCTGGCAATTGGATTGCCAG	.(((((..................((((.((..((((((..((((...(((.(((((((((..(((((.&.)))))..))))))))).)))))))..).)))))..)))))))))))	-34.8	No	No	Yes
1062433_1	rRNA	b3854	rrlA	4039349	4039405	+	CTGCCCGGTGCCGGAAGGTTAATTGATGGGGTTAGCCGCAAGGCGAAGCTCTTGAT	ncRNA	b3864	spf	4049931	4049988	+	GACCTTTTACTTCACGTAATCGGATTTGGCTGAATATTTTAGCCGCCCCAGTCAGTA	0	0	1	1	AATTGATGGGGTTAGCCGCAAGGCGAAGCTCTTGAT&TTCACGTAATCGGATTTGGCTGAATATTTTAGCCGCCCCAGTCAGTA	.(((((((((((((((((.((..(((....(.(((.&.))).)...)))..))))))))............)))))).))))).	-23.3	No	Yes	No
1062729_1	5UTR	b0957	ompA	1020125	1020186	-	GCCAGGGGTGCTCGGCATAAGCCGAAGATATCGGTAGAGTTAATATTGAGCAGATCCCCCG	rRNA	b2589	rrlG	2727444	2727512	-	GGCAAAATGGTGCCGTAACTTCGGGAGAAGGCACGCTGATATGTAGGTGAGGTCCCTCGCGGATGGAG	0	0	1	1	GCCAGGGGTGCTCGGCATAAGCCGAAGATATCGGTAGAGTTA&AAATGGTGCCGTAACTTCGGGAGAAGGCACGCTGATATGTAGGTGAGGTCCCTCGCG	((.(((((..(((((((((..((((((.((.(((((..(((.&.)))..))))))).))))))...............)))))...)))).))))).)).	-31.6	No	No	Yes
1063264_1	protein_coding	b4662	sgrT	77516	77554	+	TGACTTGCCTGCATCATGTGTGACTGAGTATTGGTGTA	tRNA	b3799	proM	3982791	3982840	+	GAATCCTCTCTCGCCGACCAATTTTGAACCCCGCTTCGGCGGGGTTTTT	0	0	1	1	GCCTGCATCATGTGTGACTGAGTATTGGTG&GACCAATTTTGAACCCCGCTTCGGCGGGG	.(((((.....(((.(..(.((.((((((.&.)))))).)).)..).)))....))))).	-17.5	Yes	No	No
1063391_1	pseudogene	b4505	insX	280198	280234	-	AAAGAAGTACGGTCCGGATTCTTCCACTAATAAAGA	antisense_protein_coding	antisense-b3251	antisense-b3251	3400153	3400173	+	CGGTTTCTTCCATTAACAAA	0	0	1	1	AGAAGTACGGTCCGG&CGGTTTCTTCC	.((((......(((.&)))...)))).	-6.3	No	Yes	No
1063588_1	protein_coding	b3464	ftsY	3604177	3604219	-	TTTTTTTCCTGGCTGGGCTTTGGTCAAAAAGAGCAGACCCCG	protein_coding	b3516	gadX	3665436	3665498	-	AATCTTCGCTATGCAGAAATGCTACGTAAAAGAGCATTAATCTTTGCGTTGTTATCTGTTTT	4.11531e-41	7.4048e-41	1	1	TTTTTTTCCTGGCTGGGCTTTGGTCAAAAAGAG&ATCTTCGCTATGCAGAAATGCTACGTAAAAGAGC	((((((((.((((...((..((((....((((.&.)))).)))).))......)))).).))))))).	-9.5	No	Yes	No
106371_10	protein_coding	b2428	murQ	2546115	2546142	+	ATAGCCGGGAAGGCGGTGTTAATGATC	protein_coding	b2429	murP	2547032	2547079	+	TTCACGCCGCTGATCCCCGGTTTTATTGCCGCCGGTCTGCTGCTGGG	0	0	2	1	TAGCCGGGAAGGCGGTGTT&CACGCCGCTGATCCCCGGTTT	.(((((((..((((((((.&.))))))))....))))))).	-25.8	Yes	No	No
1063799_1	tRNA	b3799	proM	3982796	3982844	+	CTCTCTCGCCGACCAATTTTGAACCCCGCTTCGGCGGGGTTTTTTGTT	protein_coding	b4336	yjiN	4567205	4567236	-	TCATCGAACTCAGACGCGCCAAAAGGTTGGC	1.48214e-90	3.16187e-90	1	1	CGCCGACCAATTTTGAACCCCGCTTCGGCGGGGTTTTTTGT&TCATCGAACTCAGACGCGCCAAAAGGTTGGC	.(((((((..(((((......((..((...((((((..((.&.))..))))))...)).))))))))))))))	-20.6	No	Yes	No
106447_19	protein_coding	b3708	tnaA	3889513	3889584	+	ATATGCTGGCGATGTCCGCCAAGAAAGATGCGATGGTGCCGATGGGCGGCCTGCTGTGCATGAAAGACGAC	protein_coding	b3709	tnaB	3890603	3890666	+	CGCTAATCCACGTATTGTCGGGATCTGCACAGCCATTTTCGTTGCCAGCGTATTGTGGTTAAG	0.00193668	0.0024631	7	1	ATATGCTGGCGATGTCCGCCAAGAAAGATGCGATGGTGCCGATGGGCGG&CGCTAATCCACGTATTGTCGGGATCTGCACAGCCATTTTCGTTGCCAGCGTATT	((((((((((((((...((......((((.(((((((((.(((.((((.&)))).)))...)))))))))..)))).....))......)))))))))))))).	-40.9	No	Yes	No
106494_20	protein_coding	b2829	ptsP	2967652	2967686	-	CGGACACCCGGCTGCGTCGCGAATTGTTTGCCGA	rRNA	b3970	rrlB	4171471	4171495	+	TTGATAGGCCGGGTGTGTAAGCGC	1.38055e-15	2.12578e-15	1	1	CGGACACCCGGCTGCGTCGC&TTGATAGGCCGGGTGTGTA	.(.((((((((((..((((.&.)))).)))))))))).).	-24	No	No	Yes
1065265_1	tRNA	b0216	aspV	236951	237010	+	AGAATACCTGCCTGTCACGCAGGGGGTCGCGGGTTCGAGTCCCGTCCGTTCCGCCACTA	rRNA	b2591	rrsG	2731039	2731084	-	AGGAAGCAGCTTGCTGCTTCGCTGACGAGTGGCGGACGGGTGAGT	0	0	2	1	ATACCTGCCTGTCACGCAGGGGGTCGCGGGTTCGAGTCCC&AGGAAGCAGCTTGCTGCTTCGCTGACGAGTGGCGGACGGGTGA	.((((((.((((((((((((((((.(((((((.(..(((.&.)))..)))))))).))))).))).)..))))))).)))))).	-38.2	Yes	No	Yes
1065881_1	antisense_pseudogene	antisense-b4582-1	antisense-b4582-1	2070459	2070533	-	TTCACTAATGACTACTCTAAAAAGTTGTATCAATTTAAGTGATATAGGGAGTCCGGAGATTCACCCTTTTTGGT	tRNA	b3799	proM	3982791	3982845	+	GAATCCTCTCTCGCCGACCAATTTTGAACCCCGCTTCGGCGGGGTTTTTTGTTT	8.28193e-21	1.32812e-20	1	1	TACTCTAAAAAGTTGTATCAATTTAAGTGATATAGGGAGTCCGGAGATTCA&GAATCCTCTCTCGCCGACCAATTTTGAACCCCGCTTCGGCGGGGTT	.(((((...((((.((.((((..(..((......(((((...((.(((((.&))))))))))))....))..)..))))))...))))....))))).	-18.7	No	Yes	No
1066155_1	tRNA	b2814	metZ	2947387	2947442	+	GCGGGGTGGAGCAGCCTGGTAGCTCGTCGGGCTCATAACCCGAAGGTCGTCGGTT	5UTR	b3321	rpsJ	3453298	3453366	-	GGGGAGCTACGTAAGAACGGTTACACTCTCCCATCAATCGTAATGGGTCTGAGGAGTAATCATTTTCG	0	0	1	1	CTGGTAGCTCGTCGGGCTCATAACCCGAAGGTCGTCG&GGGGAGCTACGTAAGAACGGTTACACTCTCCCATCAATCGTAATGGGTCTGAGGAGTAATCAT	.((((.((((.((((((((((((((((.((.((.((.&)).)).)).)).......)))))....................))))))))).)))).)))).	-31.4	Yes	No	No
1067881_1	protein_coding	b0440	hupB	461431	461489	+	TATAAAGAGGAAGAGAAGAGTGAATAAATCTCAATTGATCGACAAGATTGCTGCAGGG	protein_coding	b1906	yecH	1989369	1989426	-	ATGCCAGTCTGGAAGCTGCGATTAAAGCGCGTTTTGGTGAACAGGCACGTTTTCACA	5.44117e-08	7.71218e-08	1	1	AGAAGAGTGAATAAATCTCAATTGATCGACAAGATTGCTGCAG&ATGCCAGTCTGGAAGCTGCGATTAAAGCGCGTTTTGGTGAACAGGCACGTTTTCA	.((((((((......(((((((((((((.((((((((..(((.&.)))))))))......)))))))))........)))).)).....))).))))).	-18.6	No	Yes	No
1067947_1	ncRNA	b4432	ryeA	1923085	1923157	+	TTCTGGCTTTTAACAGATAAAAAGAGACCGAACACGATTCCTGTATTCGGTCCAGGGAAATGGCTCTTGGGA	protein_coding	b3844	fre	4026876	4026908	+	TGCCCGCTCGATTTTGCTGACAGCGTTGGCGC	0	0	1	1	ACGATTCCTGTATTCGGTCCAGGGAAATGGCTCTTGGGA&GCCCGCTCGATTTTGCTGACAGCGTTGG	.((((..((((........(((.(((((.(....((((.&.))))..).))))).))))))).)))).	-17.5	No	Yes	No
106808_22	protein_coding	b1091	fabH	1149667	1149688	+	TTTGGCGGTGGATTCACCTGG	ncRNA	b4438	cyaR	2167112	2167178	+	CGCTGAAAAACATAACCCATAAAATGCTAGCTGTACCAGGAACCACCTCCTTAGCCTGTGTAATCT	8.80461e-112	1.97899e-111	1	1	TGGCGGTGGATTCACCTGG&ACCAGGAACCACCTCCT	.((.(((((.....(((((&.)))))..))))).)).	-18.7	No	Yes	No
1068309_1	rRNA	b0204	rrlH	226296	226323	+	GCATGCTTAGGCGTGTGACTGCGTACC	rRNA	b2589	rrlG	2729131	2729174	-	CTAAGCGTACACGGTGGATGCCCTGGCAGTCAGAGGCGATGAA	6.10322e-96	1.3204e-95	2	1	GCATGCTTAGGCGTGTGACTGCGTACC&CGTACACGGTGGATGCCCTGGCAGTC	((.((((..(((((.(.((((.((((.&.)))).)))).))))))..)))))).	-22.6	Yes	No	No
106849_22	protein_coding	b2535	csiE	2665484	2665528	+	CTGCCAGATCTTGCTGACGCTCTTTCAGCCGGGGTTGACCGCCA	ncRNA	b4445	omrB	2976345	2976384	-	CCAGAGGTATTGATAGGTGAAGTCAACTTCGGGTTGAGC	2.54874e-232	6.81451e-232	4	1	CGCTCTTTCAGCCGGGGTTGACCGCCA&AGGTGAAGTCAACTTCGGGTTGAGC	.((((......(((((((((((((((.&.))))..)))))))))))...))))	-27	No	No	Yes
106850_1	antisense_protein_coding	antisense-b0130	antisense-b0130	146061	146079	-	GCGGCGTGAACGTGCAAA	3UTR	b1740	nadE	1823312	1823330	+	AAAGAGTAATTTGTTCAC	0	0	1	1	CGTGAACGTGCA&AGTAATTTGTTCAC	.((((((((((.&.)))...)))))))	-8.2	No	No	Yes
10689_63	protein_coding	b3731	atpC	3915963	3915991	-	GCCTTAATCGGAGGGTGATATGGCAATG	3UTR	b4484	cpxP	4106329	4106371	+	TTTTCCTTGCCATAGACACCATCCCTGTCTTCCCCCACATGC	3.42418e-11	5.05975e-11	13	1	CGGAGGGTGATATGGCAAT&CTTGCCATAGACACCATCCC	.(((.((((.((((((((.&.))))))))..)))).))).	-21.7	Yes	Yes	Yes
107028_10	rRNA	b0205	rrfH	228814	228845	+	CGCCGTAGCGCCGATGGTAGTGTGGGGTCTC	protein_coding	b3182	dacB	3330116	3330148	+	CTTTATCTCCATGCTGCCGCTGGCGGGCTATG	0.000293626	0.000383913	1	1	CCGTAGCGCCGATGGTAGTGTGGGGT&TCTCCATGCTGCCGCTGGCGGGCTATG	.((((((((((.(((((((((((((.&.))))))))))))).))))..))))))	-32.8	Yes	No	No
107066_20	protein_coding	b2378	lpxP	2495701	2495732	+	TGGTTTGGGCTTGGTGTACTCTGGCTTTGGG	3UTR	b4484	cpxP	4106330	4106370	+	TTTCCTTGCCATAGACACCATCCCTGTCTTCCCCCACATG	1.04627e-171	2.59065e-171	26	1	TGGTTTGGGCTTGGTGTACTCTGGCTTTGGG&TCCTTGCCATAGACACCATCCCTGTCTT	.((...(((..((((((.((.((((...((.&.))..)))).)))))))).)))...)).	-23.9	Yes	No	Yes
1070682_1	5UTR	b0411	tsx	432062	432091	-	CTCTGTATACGAAATATTTAGAAACGCAA	antisense_protein_coding	antisense-b0767	antisense-b0767	799512	799529	-	CCTTTTTCATGCAGTAG	0	0	1	1	CTCTGTATACGAAAT&TTTTCATGCAGTAG	((((((((..((((.&.)))))))))).))	-6.6	Yes	No	No
1070720_1	ncRNA	b4585	chiX	507224	507277	+	GCATAATAATAAAAAAATGAAATTCCTCTTTGACGGGCCAATAGCGATATTGG	inter	int-3193-1	int-3193-1	1985070	1985132	+	ACGTCTCCGTGAATCACTGGTCGTTCACACCCCCTCTGCATCATGCAGAGGGGAATTTTTCC	0	0	1	1	TGAAATTCCTCTTTGACGGGCCAATAGCGATA&GGTCGTTCACACCCCCTCTGCATCATGCAGAGGGGAATTTTT	.((((((((((((((..(((.....((((((.&.)))))).....)))............)))))))))))))).	-24.6	No	No	Yes
1070896_1	protein_coding	b1598	ydgD	1671929	1671996	+	AATAATCATAATTACCCACCAGAGTGTGATATGCGTACAACCATTGCTGTAGTGTTGGGTGCAATTA	ncRNA	b4432	ryeA	1923081	1923121	+	ATGCTTCTGGCTTTTAACAGATAAAAAGAGACCGAACACG	0	0	1	1	AGTGTGATATGCGTACAACCATTGCTGTAGTGTTGGGTGCAA&ATGCTTCTGGCTTTTAACAGATAAAAAGAGACCGAACACG	.((((.....(.((..........((((...((((((.(((.&.))).)))))).....))))..........)))..)))).	-13.3	No	No	Yes
10709_368	protein_coding	b0881	clpS	923135	923157	+	TCTTTACCGCCGAGGTTGCAGA	protein_coding	b1243	oppA	1301653	1301680	+	CCGATCTCGGCGTGAAAGCTATTGATG	3.03579e-16	4.33011e-16	9	1	TCTTTACCGCCGAGGTTGC&CCGATCTCGGCGTGAAAGC	.((((..(((((((((((.&.)))))))))))..)))).	-21.1	No	Yes	No
1071318_1	ncRNA	b4704	arrS	3657984	3658049	-	CCGATTTAAATATCGAGTCTCCTTGTTTCGACTTAAGCTGGCAATTGGATTGCCAGCTTTCTTTT	protein_coding	b3536	bcsE	3697832	3697853	+	TGGTCTGGTTTGAAGATGATC	1.38161e-80	2.85727e-80	1	1	TTCGACTTAAGCTGGCAATTGGATTGCCAG&TGGTCTGGTTTGAAGATGAT	.(((.((((((((((..........((((.&))))))))))))).).))).	-9.4	No	Yes	No
1072079_1	protein_coding	b1112	bhsA	1169118	1169178	+	TGTCATTTGCCAGCTTTGCGGCTGTCGAAGTTCAGTCAACGCCAGAAGGCCAACAAAAAG	5UTR	b3956	ppc	4153108	4153138	-	ACAGGGCTATCAAACGATAAGATGGGGTGT	3.96052e-09	5.70622e-09	1	1	TTGCCAGCTTTGCGGCTGTCGAAGTTCA&AGGGCTATCAAACGATAAGATGGGGT	.(.(((.(((..((..((....(((((.&.)))))..))..))..))).))).).	-14	No	Yes	No
1072081_1	protein_coding	b1112	bhsA	1169118	1169175	+	TGTCATTTGCCAGCTTTGCGGCTGTCGAAGTTCAGTCAACGCCAGAAGGCCAACAAA	ncRNA	b4704	arrS	3657984	3658048	-	CGATTTAAATATCGAGTCTCCTTGTTTCGACTTAAGCTGGCAATTGGATTGCCAGCTTTCTTTT	1.38161e-80	2.85727e-80	1	1	GTCATTTGCCAGCTTTGCGGCTGTCGAAGTTCAGTCAACGCCAGAAGGCC&AGTCTCCTTGTTTCGACTTAAGCTGGCAATTGGA	.(((.((((((((((.......((((((...........((.((.((((.&.)))).)).))))))))..)))))))))).))).	-27.6	No	Yes	No
1073502_1	rRNA	b0201	rrsH	224728	224765	+	ATTCGATGCAACGCGAAGAACCTTACCTGGTCTTGAC	protein_coding	b4037	malM	4250469	4250531	+	GGTAATTACGCCCCACAGTGCTGATTTTGCAACAACTGGTGCGTCTCCTGGCGCACCTTTTT	8.99851e-211	2.34737e-210	1	1	CGATGCAACGCGAAGAACCTTACCTGGT&CCCACAGTGCTGATTTTGCAACAACTGGTGCGTCT	.((((((..((((((.....(((.(((.&.)))..)))....)))))).........)))))).	-12.3	No	No	Yes
1073629_1	ncRNA	b4432	ryeA	1923084	1923154	+	CTTCTGGCTTTTAACAGATAAAAAGAGACCGAACACGATTCCTGTATTCGGTCCAGGGAAATGGCTCTTG	protein_coding	b3229	sspA	3377302	3377342	-	ATTGTGCTGGCTGAGAAAGGTGTAAGTTTCGAGATCGAAC	0	0	1	1	AGATAAAAAGAGACCGAACACGATTCCTGTATTCGGTCCAGGGA&GTGCTGGCTGAGAAAGGTGTAAGTTTCGAGATCG	.(((.....(((((...((((..(((......((((.((((.(.&.).)))))))))))..))))..)))))...))).	-20.7	Yes	No	No
1073688_1	antisense_protein_coding	antisense-b0537	antisense-b0537	564821	564866	+	TTCTTTATATCCTCCATAATTTCAGAGTGGGACATATTTGGGACA	antisense_protein_coding	antisense-b2716	antisense-b2716	2842368	2842388	-	CAATCACTTTTTTATACCAC	0	0	1	1	CAGAGTGGG&ATCACTTTT	.(((((((.&.))))))).	-5.9	Yes	No	No
1073966_1	protein_coding	b1590	ynfH	1664307	1664335	+	GGTCTTGGATGCTGGCTTTGCCCGCTCA	ncRNA	b4443	gcvB	2942715	2942787	+	AAGTTTTATCGGAATGCGTGTTCTGGTGAACTTTTGGCTTACGGTTGTGATGTTGTGTTGTTGTGTTTGCAA	2.30494e-274	6.44987e-274	1	1	GGTCTTGGATGCTGGCTTTGCCCGC&TCGGAATGCGTGTTCTGGTGAACTTTTGGCTT	((((..(..((((((...((((((.&.)))...)))....))))))..)....)))).	-10	No	No	Yes
1074031_1	ncRNA	b4445	omrB	2976361	2976385	-	CCCAGAGGTATTGATAGGTGAAGT	3UTR	b4484	cpxP	4106347	4106366	+	CCATCCCTGTCTTCCCCCA	0	0	1	1	AGAGGTATTGATAGGTGAA&ATCCCTGTCTTCCCCCA	.(.((....((((((.((.&.))))))))....))).	-10.9	No	No	Yes
107420_19	ncRNA	b4445	omrB	2976345	2976385	-	CCCAGAGGTATTGATAGGTGAAGTCAACTTCGGGTTGAGC	protein_coding	b4240	treB	4464727	4464831	-	CATCATCCCGATTGTACTCACCTCGTTTATCTATCAGCGGAAATACCGCCTGGGCACGCTGGACATTGTTTAATTTTCTTCGGGGCGCAATTGCGCCCCCTCGC	0	0	5	1	CCCAGAGGTATTGATAGGTGAAGTCAACTTCGGGTTGAG&ATCATCCCGATTGTACTCACCTCGTTTATCTATCAGCGGAAATACCGCCTGGGC	(((((.(((((((((((((((((((((..(((((.(((.&.))).)))))))).)))........))))))))))......)))))..))))).	-34.5	No	Yes	No
107467_22	protein_coding	b1480	sra	1555939	1555993	-	TAAAACTAGCTACAGGATTGAGGAGTTAAAATGAAATCGAACCGTCAGGCACGT	rRNA	b4010	rrfE	4213039	4213109	+	TGCCTGGCGGCAGTAGCGCGGTGGTCCCACCTGACCCCATGCCGAACTCAGAAGTGAAACGCCGTAGCGC	0	0	1	1	AGCTACAGGATTGAGGAGTTAAAATGAAATCGAACCGTCAGGCAC&TGCCTGGCGGCAGTAGCGCGGTGGTCCCACCTGACCCCATGCCGAACTCAGAAGTGAAACGCCGTAGCG	.(((((.((..((.((.((((....((.((((..((((((((((.&))))))))))........))))..)).....))))))))..))....................))))).	-31.9	No	No	Yes
1074974_1	protein_coding	b2500	purN	2622270	2622292	+	ATTTACAGGCAATTATTGACGC	3UTR	b4037	malM	4250488	4250532	+	GCTGATTTTGCAACAACTGGTGCGTCTCCTGGCGCACCTTTTTT	2.96548e-30	5.04441e-30	1	1	ACAGGCAATTATTGACGC&TGCGTCTCCTGG	.((((........(((((&.))))).)))).	-10	No	No	Yes
107607_16	ncRNA	b4443	gcvB	2942733	2942831	+	TGTTCTGGTGAACTTTTGGCTTACGGTTGTGATGTTGTGTTGTTGTGTTTGCAATTGGTCTGCGATTCAGACCATGGTAGCAAAGCTACCTTTTTTCA	5UTR	b3795	yifK	3980851	3980885	+	ACACCGGAAAGCATGCAAACACAACACGAGGATT	0	0	23	1	TGTTGTGTTGTTGTGTTTGCAATTGGTCTGCGATTCAGACCATGGTA&CACCGGAAAGCATGCAAACACAACACGAGGATT	.(((.(..(((((((((((((.......(((..(((......((((.&.))))))).))))))))))))))))..).))).	-25.1	Yes	Yes	No
1076554_1	ncRNA	b4585	chiX	507224	507287	+	GCATAATAATAAAAAAATGAAATTCCTCTTTGACGGGCCAATAGCGATATTGGCCATTTTTTT	protein_coding	b3963	fabR	4161643	4161671	+	AACAACGTCGGCAATTAGAAGAGCGACT	1.35138e-107	3.00775e-107	1	1	TTCCTCTTTGACGGGCCAATAGCGATATTGG&ACAACGTCGGCAATTAGAAGAGCGAC	.((((((((.....(((......(((.(((.&.))).)))))).....)))))).)).	-14.2	Yes	No	No
107661_11	rRNA	b3758	rrlC	3945931	3945957	+	TGTCTGGTGGGTAGTTTGACTGGGGC	3UTR	b4484	cpxP	4106332	4106370	+	TCCTTGCCATAGACACCATCCCTGTCTTCCCCCACATG	0	0	1	1	GGTGGGTAGTTTGACTGGGGC&ATCCCTGTCTTCCCCCACA	.(((((......(((.((((.&.)))).)))....))))).	-17.5	No	Yes	No
1076879_1	ncRNA	b4585	chiX	507216	507265	+	AAGTGACGGCATAATAATAAAAAAATGAAATTCCTCTTTGACGGGCCAA	3UTR	b4171	miaA	4400215	4400264	+	AGACGTATCGTGCGCAATTTTTTCAGAATCGAAAGGTTCAAAGTACAAA	0	0	1	1	TCTTTGACGGGCCA&AGGTTCAAAGT	.((((((...(((.&.))))))))).	-8.1	No	Yes	No
107712_16	5UTR	b2150	mglB	2240389	2240428	-	CAGTAACACTTCATTAACTCTACTGCCCCGCCGAGCATT	5UTR	b3800	aslB	3982823	3982843	+	GCTTCGGCGGGGTTTTTTGT	4.49851e-248	1.22014e-247	4	1	TGCCCCGCCGAGCA&GCTTCGGCGGGGTT	.((((((((((((.&))).))))))))).	-25.6	Yes	Yes	No
1077401_1	antisense_protein_coding	antisense-b1184	antisense-b1184	1232218	1232240	-	CTGAAGAAATCCCCCAGCATCA	inter	int-1849-1	int-1849-1	3836149	3836171	+	CTGATCTGGGGGATGTAGAAAC	0	0	5	1	AATCCCCCAGCATCA&CTGATCTGGGGGATG	.(((((((((.((((&.))))))))))))).	-21.2	No	Yes	No
1077681_1	inter	int-719	int-719	1344653	1344720	-	ATTATATATCGTATTCCTGGATGATAATTAGCCGTTGCTGTTAAACACTTCTCTTTTAGCGGCAATT	ncRNA	b4432	ryeA	1923086	1923156	+	TCTGGCTTTTAACAGATAAAAAGAGACCGAACACGATTCCTGTATTCGGTCCAGGGAAATGGCTCTTGGG	0	0	1	1	ATCGTATTCCTGGATGATAATTAGCCGTTGCTGTTAAACACTTCTCTTTTAGCG&GGCTTTTAACAGATAAAAAGAGACCGAACACGATTCCTGTATTCGGTCCAGGGAAATGGC	.((((.(((((((((......(((..((((.((((.......(((((((((((.&.)))...........))))))))...))))))))..)))......))))))))).)))).	-29.5	No	Yes	No
107790_2	inter	int-907-1	int-907-1	1705704	1705728	+	ACCTGTTGTCGCCTGCTCTGGATT	protein_coding	b3339	tufA	3470257	3470286	-	AGAGATGGTAATGCCGGGCGACAACATCA	0.0220342	0.0252211	7	1	CTGTTGTCGCCTGCTCTG&AGAGATGGTAATGCCGGGCGACAACAT	.((((((((((((((((.&))))..........)))))))))))).	-22.6	No	Yes	No
1078037_1	protein_coding	b1920	fliY	2000313	2000373	-	CATCTGGGACGTCAGGCATTGATGGGTGTGATGGCCGTGGCGCTGGTTGCGGGCATGAGC	tRNA	b3799	proM	3982792	3982834	+	AATCCTCTCTCGCCGACCAATTTTGAACCCCGCTTCGGCGGG	0	0	1	1	GGCCGTGGCGCTGGTTGCGGGCATGAGC&CCTCTCTCGCCGACCAATTTTGAACCCCGCTTCGGCG	.((((.((((.((((((((((...(((.&.))).))))).)))))...........)))).)))).	-26.2	Yes	No	No
107834_16	5UTR	b3041	ribB	3184515	3184542	-	TTATTTTGGCTATATGCCGCCACTCCT	tRNA	b3797	hisR	3982500	3982531	+	TTTGTAGTGGTGGCTATAGCTCAGTTGGTAG	9.24806e-154	2.22814e-153	4	1	TTTGGCTATATGCCGCCACTC&TAGTGGTGGCTATAGCTCAGT	.(((((((((.(((((((((.&.))))))))))))))).))).	-26	Yes	No	No
107926_1	3UTR	b2831	mutH	2970394	2970418	+	TCATTTTTTTGGCAGGGCTTTTTA	ncRNA	b4445	omrB	2976322	2976344	-	CATGAATTACACCAGCCTGCGC	0	0	1	1	GGCAGGGCTT&CAGCCTGCG	.(((.((((.&.))))))).	-10.2	Yes	No	No
107938_19	protein_coding	b2520	yfhM	2651898	2651931	-	TAATCTTAAAGAGTTACGTTTACGCCACCTCGA	protein_coding	b3666	uhpT	3845733	3845791	-	GTTGACAGTGGCATAAACGTAACTGGTGACTTTTGCCCGGCATGACGCCGGGCTTTTT	0.00133321	0.00170572	3	1	GAGTTACGTTTACGCCACCTCGA&GTTGACAGTGGCATAAACGTAACTG	.(((((((((((.(((((.((((&.))))..))))).))))))))))).	-24.6	No	Yes	No
1079934_1	protein_coding	b2386	fryC	2506654	2506675	-	AAGGCAAATTGTTAATCGATA	protein_coding	b3781	trxA	3965713	3965777	+	ACCAACAACGAAACCAACACGCCAGGCTTATTCCTGTGGAGTTATATATGAGCGATAAAATTAT	0	0	1	1	AGGCAAATTGTTAATCGA&ACGAAACCAACACGCCA	.(((...(((....(((.&.)))...)))...))).	-6.9	No	No	Yes
108007_16	pseudogene	b2092-1	b2092-1	2174214	2174255	-	TATTCTCGACCTCGGCCCTACGGTGATGCTGCCGATTGTCA	protein_coding	b2095	gatZ	2176048	2176075	-	ATTCTCGGCGGCGATCATCTGGGGCCA	2.6737e-88	5.66359e-88	5	1	CGGCCCTACGGTGATGCTGCCGAT&CTCGGCGGCGATCATCTGGGGCCA	.(((((((.((((((((((((((.&.)))))))).))))))))))))).	-37.6	Yes	No	No
108069_1	antisense_protein_coding	antisense-b1039	antisense-b1039	1102231	1102248	+	GAATCAGTGCAAAGACG	5UTR	b2181	yejG	2278292	2278312	-	AAAGACGGATTGTTGATGAT	0	0	1	1	AATCAGTGCAAAGACG&ACGGATTGTTGATGAT	.((((..((((...((&.))..))))...))))	-5	No	No	Yes
108079_16	pseudogene	b3427	yzgL	3563766	3563834	-	TTTATGCTGGCGCTGGGCGCATTAATGCTATTTTTCTCGGGGCGAGTGGGGAACGTGCCTGAGTTTTG	protein_coding	b3652	recG	3825909	3825962	+	TCAGCATGTTAGCCTTACGTGCCGGAGCACAGCGTTTTCATGCCCAGCCGCTG	7.14409e-06	9.70959e-06	6	1	TGGCGCTGGGCGCATTAATGCTATTTTTCTCGGGGCGAGTGGGGAACGTGCCTGAG&TCAGCATGTTAGCCTTACGTGCCGGAGCACAGCGTTTTCATGCCCAGCCGCTG	.(((((((((((....((((((......(((..((((.((((((((((((.((((.&))))))))))..)))))).)))).)))...))))))....)))))))).))).	-52.5	Yes	No	No
1080863_1	tRNA	b1989	asnV	2062259	2062333	+	TCCTCTGTAGTTCAGTCGGTAGAACGGCGGACTGTTAATCCGTATGTCACTGGTTCGAGTCCAGTCAGAGGAGC	ncRNA	b4444	omrA	2976103	2976167	-	ATTATTCGGTACGCTCTTCGTACCCTGTCTCTTGCACCAACCTGCGCGGATGCGCAGGTTTTTT	0	0	1	1	ACTGTTAATCCGTATGTCACTGGTTCGAGTCCAGTCAGAGGAGC&CGCTCTTCGTACCCTGTCTCTTGCACCAACCTGCGCGGATGCGCAGG	.((((..((((((.......((((.((((..(((...(((((((&.))))))).....)))...)))).))))......))))))..)))).	-32.7	No	Yes	No
1080913_1	protein_coding	b2977	glcG	3123833	3123891	-	CTGGTTTAACCGGAGCACAGGATGCGCAGGTCGCGAAAGCGGCAGCAGCGGTGTTGGC	ncRNA	b4704	arrS	3657992	3658054	-	GTAATCCGATTTAAATATCGAGTCTCCTTGTTTCGACTTAAGCTGGCAATTGGATTGCCAGC	6.510056e-318	1.9025687e-317	1	1	CTGGTTTAACCGGAGCACAGGATGCGCAGGTCGCGAAAGCGGCAGCAGCGGTGTTG&AAATATCGAGTCTCCTTGTTTCGACTTAAGCTGGCAATTGGATTGCCAGC	(((((....((((.((.((....((..((((((.(((...((.((...(((((((.&.)))))))...))))...)))))))))..))))))..))))...))))).	-29.2	No	No	Yes
108111_19	tRNA	b1230	tyrV	1287294	1287329	-	TGGTGGGGTTCCCGAGCGGCCAAAGGGAGCAGACT	rRNA	b3854	rrlA	4038364	4038405	+	TCATCTCCGGGGGTAGAGCACTGTTTCGGCAAGGGGGTCAT	1.27891e-39	2.28258e-39	1	1	GGGTTCCCGAGCGGCCAAAGGGAGCAGA&ACTGTTTCGGCAAGGGGGTCA	.(((((((.....(((....(((((((.&.))))))))))..))))))).	-18.3	No	Yes	No
1081563_1	protein_coding	b3251	mreB	3400990	3401063	-	TTTTCCAATGACTTGTCCATTGACCTGGGTACTGCGAATACCCTCATTTATGTAAAAGGACAAGGCATCGTAT	tRNA	b3799	proM	3982792	3982846	+	AATCCTCTCTCGCCGACCAATTTTGAACCCCGCTTCGGCGGGGTTTTTTGTTTT	0	0	1	1	TGACCTGGGTACTGCGAATACCCTCATTTATGTAAAAGGACAAGGCA&CGCCGACCAATTTTGAACCCCGCTTCGGCGGGGTTT	.(((((.(.(...(((................(((((......(((.&.)))......))))).....)))...).).))))).	-15.6	Yes	No	No
10815_30	rRNA	b2589	rrlG	2728926	2728947	-	TGGTGGGGTTCCCGAGCGGCCAAAGGGAGCAGACT	protein_coding	b3499	rlmJ	3645692	3645716	+	TCATCTCCGGGGGTAGAGCACTGTTTCGGCAAGGGGGTCAT	0	0	6	1	GGGTTCCCGAGCGGCCAAAGGGAGCAGA&ACTGTTTCGGCAAGGGGGTCA	.(((((((.....(((....(((((((.&.))))))))))..))))))).	-18.3	Yes	No	No
1081969_1	tRNA	b3761	trpT	3946970	3947032	+	ATTGGTAGAGCACCGGTCTCCAAAACCGGGTGTTGGGAGTTCGAGTCTCTCCGCCCCTGCCA	tRNA	b3799	proM	3982792	3982848	+	AATCCTCTCTCGCCGACCAATTTTGAACCCCGCTTCGGCGGGGTTTTTTGTTTTCT	0	0	1	1	TGGTAGAGCACCGGTCTCCAAAACCGGGTGTTGGGAGTTCGAGTCTCTCCGCC&CGCCGACCAATTTTGAACCCCGCTTCGGCGGGGTTTTTTGTTTTCT	.((.((((((.....((((....(((((.(.((((.(((((((....((.((.&.)).)).....))))))))))))))))).)))).....))))))))	-27.5	Yes	No	No
108211_22	protein_coding	b2420	yfeS	2537801	2537869	+	AGATTACGAAGGGGATAGTTTAGCTGTCAACTATGGCAAGGTAGGTAGTATTGGTAAATTCCAGACAA	3UTR	b4484	cpxP	4106331	4106371	+	TTCCTTGCCATAGACACCATCCCTGTCTTCCCCCACATGC	4.79423e-111	1.07598e-110	3	1	AGGGGATAGTTTAGCTGTCAACTATGGCAAGGT&TCCTTGCCATAGACACCATCCCTGTCTTCCCCC	.(((((.((..(((.((....(((((((((((.&.)))))))))))....))...))).))))))).	-28.5	No	No	Yes
108222_16	protein_coding	b3066	dnaG	3212484	3212524	+	AAAATCCAGAATTAGCGACGTTGGTCCCGCCGCTTGAGAA	protein_coding	b3778	rep	3961145	3961170	+	TTGGCGAGCGGGACCGTATTTTTGC	0.000386727	0.000504412	4	1	AGCGACGTTGGTCCCGCCGCTT&TGGCGAGCGGGACCGTATTTTTGC	.((((...(((((((((((((.&.)))).))))))))).....))))	-27	Yes	No	No
108265_1	protein_coding	b3637	rpmB	3811608	3811631	-	GTAACAACCGTTCCCACGCACTG	rRNA	b3970	rrlB	4169914	4169945	+	AAGCGGGTGAAAAGCCCGCTCGCCGGAAGAC	1.05874e-18	1.54206e-18	1	1	ACCGTTCCCACGCA&AGCGGGTGAAAAGCCCGCTCGCCGGA	.((((((((.(((.&.))))).)))............))).	-10	No	No	Yes
1083093_1	protein_coding	b3029	ygiN	3173328	3173397	+	TTGAGCAGTGGGAAAGCATCGCGCATCTTGAAGCGCATCTGCAAACCCCGCACATGAAGGCGTATAGCG	ncRNA	b3864	spf	4049899	4049947	+	TAGGGTACAGAGGTAAGATGTTCTATCTTTCAGACCTTTTACTTCACG	1.20866e-117	2.74961e-117	1	1	AGTGGGAAAGCATCGCGCATCTTGAAGCGCATCTGCAAACCCC&AGGGTACAGAGGTAAGATGTTCTATCTTTCAGACC	.((..(((((.((.(.(((((((.....((.((((...((((.&.)))).)))).))))))))).).)))))))..)).	-22.7	No	No	Yes
1083132_1,305439_1	protein_coding	b3516	gadX	3664904	3665001	-	AGGAATAAGATTATAGAGTTTTACTCAGACATAAAAAAAACCCGGCATAGGGGACCGGGAAGAGGATAGTCTGCCGTCTCCAGACTAATAAACCGTT	ncRNA	b3864	spf	4049898	4049987	+	GTAGGGTACAGAGGTAAGATGTTCTATCTTTCAGACCTTTTACTTCACGTAATCGGATTTGGCTGAATATTTTAGCCGCCCCAGTCAGT	0	0	5	2	AGGAATAAGATTATAGAGTTTTACTCAGACATAAAAAAAACCCGGCATAGGGGACCGGGAAGAGGATAGTCTGCCGTCTCCAGACT&GTAGGGTACAGAGGTAAGATGTTCTATCTTTCAGACCTTTTACTTCACGTAATCGGATTTGGCTGAATATTTTAGCCG	.((..(((((.(((..((((.................(((.((((...(((((.(..(((((((((..(((((((.(((((..((.&))..))...))))))).)))..))).)))))).).)))))............)))).)))))))..)))))))).)).	-29.4	Yes	Yes	Yes
1083512_1	ncRNA	b4444	omrA	2976103	2976167	-	ATTATTCGGTACGCTCTTCGTACCCTGTCTCTTGCACCAACCTGCGCGGATGCGCAGGTTTTTT	tRNA	b3976	thrU	4175412	4175434	+	AACTGACTTGTAATCAGTAGGT	0	0	1	1	AACCTGCGCGGATGCGCAGGTTT&TGACTTGTAATCAGTAGGT	.((((((...(((..(((((((.&.))))))).))).))))))	-16.2	No	Yes	No
1083814_1	5UTR	b0440	hupB	461403	461433	+	CCTTGAAGGATTCAAGTGCGATATAAATTA	ncRNA	b4585	chiX	507214	507288	+	TAAAGTGACGGCATAATAATAAAAAAATGAAATTCCTCTTTGACGGGCCAATAGCGATATTGGCCATTTTTTTA	0	0	1	1	CCTTGAAGGATTCAAGTGCG&GGCATAATAATAAAAAAATGAAATTCCTCTTTGACGGG	((((((((((((((.((((.&.)))).............))))..))))..)))).)).	-7.9	No	No	Yes
108383_19	protein_coding	b2408	yfeN	2525734	2525762	+	TAATGGCGGTAAAGAAGGGCTGAATGGC	protein_coding	b3707	tnaC	3888486	3888522	+	AAATTGTCGATCACCGCCCTTGATTTGCCCTTCTGT	0.00216694	0.00275363	4	1	TGGCGGTAAAGAAGGGCTGAATGGC&TGTCGATCACCGCCCTTGATTTGCCCTT	.((.((((((.(((((((((.((((&.)))).)))..))))))..)))))))).	-21.2	No	Yes	No
108448_20	protein_coding	b3632	waaQ	3807808	3807853	-	TACGGATCAGTGGATGGTGGCGCTGCTGGTACGTTGTTTACCTGC	3UTR	b4484	cpxP	4106342	4106382	+	AGACACCATCCCTGTCTTCCCCCACATGCTGTGGGGGTTT	1.77529e-166	4.36838e-166	12	1	CGGATCAGTGGATGGTGG&ACACCATCCCTGTCTTCCC	.(((.(((.((((((((.&.)))))))))))...))).	-21.5	Yes	Yes	Yes
1084606_1	5UTR	b3496	dtpB	3640794	3640850	+	AAACTTTTTCGCGCGTTATCCCTTACGCGTTCATACTTTTCAGGATGGTATTGGAA	3UTR	b3867	hemN	4053480	4053529	+	AGATTGCCTGATGCGCTGGGCAACAAAACCTGTTGAAATTATTGCTTTT	4.01768e-98	8.74244e-98	1	1	TTTTCGCGCGTTATCCCTTACGCGTTCATACTTTTCAGGA&GCCTGATGCGCTGGGCAACAAAACCTGTTGAAAT	.(((((((.(((..(((...((((..........(((((.&.)))))))))..)))......))).))).)))).	-15.2	No	No	Yes
108504_16	5UTR	b2288	nuoA	2405259	2405315	-	CAAGGATCTGGGGTGAAAGGGCATTAAATGCTAATGGTGTTGATATTATGTAAACT	protein_coding	b2683	ygaH	2810403	2810441	+	TATTTGCCGCTGCGCCTGCGTGTGGGTAATGCCCGCCC	1.88285e-23	3.07392e-23	5	1	GGGGTGAAAGGGCATTAAATGCTAATGGTGTTGA&GCTGCGCCTGCGTGTGGGTAATGCCCGCCC	.((((....((((((((..(((....(((((.(.&.).))))).....)))..))))))))))))	-24.9	Yes	No	No
108563_10	inter	int-1614	int-1614	3318347	3318376	-	CAGATTTTACGTCCCGTCTCGGTACACCA	pseudogene	b3643-1	b3643-1	3815950	3815984	-	TAGTGATGACCGAAGACGGGCGCATCATTGAAGT	9.63247e-05	0.000127544	1	1	ACGTCCCGTCTCGGTACACC&AGTGATGACCGAAGACGGGCGC	.((.(((((((((((.(((.&.)))...))))).)))))))).	-23.5	Yes	No	No
10856_364,66127_22	3UTR	b0200	gmhB	223655	223702	+	CAAGGATCTGGGGTGAAAGGGCATTAAATGCTAATGGTGTTGATATTATGTAAACT	rRNA	b4007	rrsE	4209674	4209723	+	TATTTGCCGCTGCGCCTGCGTGTGGGTAATGCCCGCCC	7.75045e-86	1.51951e-85	34	2	GGGGTGAAAGGGCATTAAATGCTAATGGTGTTGA&GCTGCGCCTGCGTGTGGGTAATGCCCGCCC	.((((....((((((((..(((....(((((.(.&.).))))).....)))..))))))))))))	-24.9	Yes	Yes	No
1086503_1	protein_coding	b1452	yncE	1523261	1523318	+	GCATTGTGAAGCAGCAAAAATATCGGTTCATCAAAGGGAGTCGTCATGCATTTACGT	3UTR	b4037	malM	4250477	4250533	+	CGCCCCACAGTGCTGATTTTGCAACAACTGGTGCGTCTCCTGGCGCACCTTTTTTT	5.06545e-118	1.1541e-117	1	1	TGTGAAGCAGCAAAAATATCGGTTCATCAAAGGGAGTCGTCATGCATTT&CAGTGCTGATTTTGCAACAACTGGTGCGTCTCCTGGCGCACC	.(((...(((......((((((((...((((.......((((.(((((.&.)))))))))))))....))))))))......)))...))).	-18.8	No	No	Yes
1086617_1	5UTR	b0654	gltJ	686688	686746	-	AAAACCGCAATACGCTGGGTAACAATCTTCGAGGGTAGCAGTTAACGCTGCTACCCTC	protein_coding	b3766	ilvL	3950290	3950354	+	TTCCTTCGAACAAGATGCAAGAAAAGACAAAATGACAGCCCTTCTACGAGTGATTAGCCTGGTC	0	0	1	1	CGCTGGGTAACAATCTTCGAGGGTAGCAGTTAACGCTGCT&TGCAAGAAAAGACAAAATGACAGCCCTTCTACGAGTGATTAGCCTGGTC	.(((((((...(((((((((((((.((((((....((((.&.))).)....)))....)).).)))))....)))).)))).))))))).	-21.4	No	Yes	No
1086686_1	ncRNA	b4439	micF	2313135	2313178	+	TACCCCTATTTCAACCGGATGCCTCGCATTCGGTTTTTTTTAC	tRNA	b3976	thrU	4175412	4175437	+	AACTGACTTGTAATCAGTAGGTCAC	0	0	1	1	AACCGGATGCCTCGCATTCGGTTT&AACTGACTTGTAATCAGTAGGTC	.(((...((....(((.((((((.&))))))..)))...))...))).	-9.8	No	No	Yes
1087328_1	antisense_protein_coding	antisense-b2842	antisense-b2842	2982557	2982575	+	CTGGAGGCAAGGAACACT	5UTR	b4200	rpsF	4425051	4425071	+	TTCCTTGCCTCCCCGGGATT	0.00819834	0.0101165	1	1	TGGAGGCAAGGAAC&TTCCTTGCCTCCC	.((((((((((((.&)))))))))))).	-22.9	No	No	Yes
108735_20	rRNA	b2591	rrsG	2731039	2731059	-	CGAGTGGCGGACGGGTGAGT	antisense_protein_coding	antisense-b4317	antisense-b4317	4546856	4546894	-	ATATTGACGTTAAGCGCTAACATCTGATCCCGTCCTTT	0	0	1	1	CGGACGGGTGAGT&TCTGATCCCGTCCT	.((((((((.((.&.)).).))))))).	-16.1	No	No	Yes
10881_35	antisense_protein_coding	antisense-b1968	antisense-b1968	2037764	2037789	+	TTCGTAAAGCATCTATCTCTGTATC	ncRNA	b3864	spf	4049900	4049918	+	AGGGTACAGAGGTAAGAT	0	0	3	1	CATCTATCTCTGTATC&GGGTACAGAGGTAAGAT	.(((((((((((((((&.)))))))))))).)))	-16.8	Yes	No	No
108881_11	protein_coding	b1629	rsxC	1707617	1707640	+	ATTTCTCTGCGGGTGATTCCAAC	ncRNA	b4438	cyaR	2167141	2167174	+	GCTGTACCAGGAACCACCTCCTTAGCCTGTGTA	8.14748e-31	1.39097e-30	1	1	TCTCTGCGGGTGATTCCA&AGGAACCACCTCCTTAGC	.((..(.(((((.((((.&.)))).))))).)..)).	-13	No	Yes	No
1088879_1	ncRNA	b4439	micF	2313119	2313174	+	TTTCTGAATGTCTGTTTACCCCTATTTCAACCGGATGCCTCGCATTCGGTTTTTT	5UTR	b3806	cyaA	3990999	3991031	+	TTTTAGACCATTTTTTCGTCGTGAAACTAAAA	0	0	1	1	ATTTCAACCGGATGCCTCGCATTCGGTTTT&TAGACCATTTTTTCGTCGTGAAAC	.((((.((..((((..........(((((.&.))))).......)))))))))).	-5.6	No	No	Yes
1089296_1	ncRNA	b4443	gcvB	2942696	2942719	+	CTTCCTGAGCCGGAACGAAAAGT	protein_coding	b3094	exuR	3247055	3247082	+	ATGCTTCCGTGATTCCGAGTGGGATTT	3.87162e-60	7.48686e-60	1	1	TTCCTGAGCCGGAACGAAAAGT&TGCTTCCGTGATTCCGAGTGGGAT	.((((..(((((((((..((((&.)))).)))...)))).)))))).	-12.9	No	No	Yes
1089344_1	ncRNA	b4585	chiX	507216	507287	+	AAGTGACGGCATAATAATAAAAAAATGAAATTCCTCTTTGACGGGCCAATAGCGATATTGGCCATTTTTTT	protein_coding	b4016	aceK	4218765	4218849	+	CGTTGGTCTGGTCGTGGAGCAACTGCGCTGCATTACTAACGGCCAAAGTACGGACGCGGCATTTTTACTACGTGTTAAAGAGCA	0	0	3	1	GGCATAATAATAAAAAAATGAAATTCCTCTTTGACGGGCCAATAGCGATATTGGCCAT&TTGGTCTGGTCGTGGAGCAACTGCGCTGCATTACTAACGGCCAAAGTACGGACGCGGCATTTTTACTACGTGTTAAAGAGCA	.((.(..(((((.......(((((.((.(((((((.((((....(((((...(((((.&.)))))..))))).........................))))...)).)))).).)).))))).......)))))..).)).	-25.2	Yes	Yes	Yes
1089422_1	3UTR	b3512	gadE	3658913	3658975	+	ATTGATGGCTGGCATGACGAGGGATGCAGATGCTGATTTCATTACCCCCGGTGATTACTAAA	ncRNA	b3864	spf	4049949	4049985	+	ATCGGATTTGGCTGAATATTTTAGCCGCCCCAGTCA	0	0	1	1	ATGACGAGGGATGCAGATGCTGATTTCATTACCCCCGGTG&ATCGGATTTGGCTGAATATTTTAGCCGCCCCAGTCA	.((((..(((.((.....(((((..(..(((.(((((((.&)))))....)).)))..)..))))))))))..))))	-19.2	No	Yes	No
1089598_1	protein_coding	b0424	yajL	443118	443153	-	CTTTGGTCTGAAAATTATCGACCTGTTGGTTGGGC	inter	int-3473	int-3473	2461094	2461133	-	AAACGCGATCCAGCTGGCAAAATTTGGAGGTGGCGCACT	2.04841e-08	2.92213e-08	1	1	TCGACCTGTTGGTTGGGC&ATCCAGCTGGCAAAATTTGGAGGTGGC	.(.((((((((((((((.&.))))))))))).........))).).	-15	No	No	Yes
108965_1	ncRNA	b4450	arcZ	3350644	3350661	+	CCCTGGTGTTGGCGCAG	inter	int-2045-1	int-2045-1	4209689	4209722	+	CTTAAAGAAGCGTTCTTTGCAGTGCTCACACAG	0	0	1	1	GGTGTTGGCGCA&AGTGCTCACACA	.((((.(((((.&.))))).)))).	-12.8	Yes	No	No
1090308_1	protein_coding	b0084	ftsI	92582	92639	+	TTGGGGTTGGTCGGAGAACGCAGTGGCTTATATCCTCAAAAACAACGGTGGTCTGAC	ncRNA	b4585	chiX	507230	507287	+	TAATAAAAAAATGAAATTCCTCTTTGACGGGCCAATAGCGATATTGGCCATTTTTTT	0	0	1	1	CAGTGGCTTATATCCTCAAAAACAACGGTGGTCTGA&ACGGGCCAATAGCGATATTGGCCATTT	.(((((((.(((((((............(((((((.&.)))))))..)).))))).))))))).	-22	No	No	Yes
1090602_1	tRNA	b3799	proM	3982791	3982843	+	GAATCCTCTCTCGCCGACCAATTTTGAACCCCGCTTCGGCGGGGTTTTTTGT	tRNA	b3976	thrU	4175408	4175434	+	GAGCAACTGACTTGTAATCAGTAGGT	0	0	1	1	CCCCGCTTCGGCGGGGTTTTTTGT&AGCAACTGACTTGTAATCAGTAGGT	.((.(((...(((((.....((((&.))))....)))))....))).)).	-9.4	No	Yes	No
1091618_1	protein_coding	b0477	gsk	500318	500352	+	ACTGGTGATTGAGGATGATGTAGCCGAAGCGCTT	ncRNA	b4433	sdsR	1923141	1923172	-	TAGCGCACGGCTCTCTCCCAAGAGCCATTTC	2.99566e-38	5.3012e-38	2	1	CTGGTGATTGAGGATGATGTAGCCGAAGCGCTT&TAGCGCACGGCTCTCTCCCAAGAGCCAT	.((((..(((.(((.((.(.(((((..(((((.&.))))).))))))))))))))..)))).	-29.7	No	No	Yes
1091647_1	ncRNA	b4704	arrS	3657985	3658054	-	GTAATCCGATTTAAATATCGAGTCTCCTTGTTTCGACTTAAGCTGGCAATTGGATTGCCAGCTTTCTTT	tRNA	b3853	alaT	4037266	4037338	+	TAGCTCAGCTGGGAGAGCGCCTGCTTTGCACGCAGGAGGTCTGCGGTTCGATCCCGCATAGCTCCACCATCT	0	0	2	1	CGATTTAAATATCGAGTCTCCTTGTTTCGACTTAAGCTGGCAATTGGATTGCCAGCTT&CAGCTGGGAGAGCGCCTGCTTTGCACGCAGGAGGTCTGCGGTTCGATCC	.((((.....(((((((((((.(((........((((.(((....(..((.((((((.&.)))))).))..)))).)))).....)))))))).)).))))..)))).	-31.7	No	No	Yes
1091774_1	tRNA	b3761	trpT	3946929	3946967	+	AGTCCCGTCCGTTCCGCCACCCTAATTAGGGGCGTAGT	rRNA	b4007	rrsE	4208938	4208967	+	TACCCTGGTAGTCCACGCCGTAAACGATG	0	0	1	1	CCGTCCGTTCCGCCACCCTAATTAGGGG&ACCCTGGTAGTCCACGCCGTAAACGATG	.(((.(((((.((....((.(((((((.&.))))))))).....)).)..)))))))	-12.5	Yes	No	No
1091984_1	rRNA	b3970	rrlB	4169815	4169844	+	TGCGTTGTTGGGTAGGGGAGCGTTCTGTA	5UTR	b4111	proP	4330407	4330440	+	GAGATTGCATCCTGCAATTCCCGCTCCCCTTTT	3.33085e-53	6.29357e-53	1	1	TAGGGGAGCGT&CCGCTCCCCTT	.(((((((((.&.))))))))).	-19.2	No	No	Yes
1092042_1	protein_coding	b2147	preA	2235573	2235605	+	TTGATCGCTTCGATCATGGGGGAAAATGAGCA	ncRNA	b4704	arrS	3657986	3658042	-	AAATATCGAGTCTCCTTGTTTCGACTTAAGCTGGCAATTGGATTGCCAGCTTTCTT	2.67079e-148	6.39371e-148	1	1	TTGATCGCTTCGATCATGGGGGAA&GTCTCCTTGTTTCGACTTAAGCTGGCAAT	(((.(((((((((....((((((.&.))))))....))))....))).))))).	-15.1	No	Yes	No
1092584_1	rRNA	b3756	rrsC	3941822	3941886	+	ATCATGGCTCAGATTGAACGCTGGCGGCAGGCCTAACACATGCAAGTCGAACGGTAACAGGAAA	antisense_protein_coding	antisense-b4016	antisense-b4016	4218920	4218989	-	AGCGGCGCTCTGGCTGAGAGCTAAAGATAAAAAGCCGCTCGGGAGTAAGCGAGCGGTGGTCAAATAACC	1.39026e-28	2.34155e-28	1	1	ATCATGGCTCAGATTGAACGCTGGCGGCAGGCCTAACACATGCAAGTCGA&GCGGCGCTCTGGCTGAGAGCTAAAGATAAAAAGCCGCTCGGGAGTAAGCGAGCGGTGGTC	(((((.((((...(((....((((((((.(((((....((.((..((((.&.))))))..))....)).)))...........))))).)))...)))..)))).))))).	-32.5	Yes	No	No
1092666_1	ncRNA	b4585	chiX	507227	507288	+	TAATAATAAAAAAATGAAATTCCTCTTTGACGGGCCAATAGCGATATTGGCCATTTTTTTA	rRNA	b3854	rrlA	4040132	4040197	+	ATCTGCCGTGGGCGCTGGAGAACTGAGGGGGGCTGCTCCTAGTACGAGAGGACCGGAGTGGACGC	0	0	1	1	TTCCTCTTTGACGGGCCAATAGCGATATTGGCC&TGCCGTGGGCGCTGGAGAACTGAGGGGGGCTGCTCCTAGTACGAGAGGAC	.(((((((.(((((.((..(((((....((((.&.))))....)))))............)).))).)).......))))))).	-25	No	No	Yes
109272_1	protein_coding	b0588	fepC	619495	619512	-	GAGATTGTCACTGCTGA	5UTR	b2215	ompC	2312760	2312781	-	CAAATAAAGGCATATAACAGA	0	0	1	1	TTGTCACTGCTG&AGGCATATAACAG	.(((...((((.&.))))....))).	-4.2	No	No	Yes
109301_20	ncRNA	b0455	ffs	476448	476474	+	GGGGCTCTGTTGGTTCTCCCGCAACG	rRNA	b3854	rrlA	4037682	4037738	+	ATAGGTTAATGAGGCGAACCGGGGGAACTGAAACATCTAAGTACCCCGAGGAAAAG	4.69121e-59	9.03917e-59	1	1	GGGGCTCTGTTGGTTCTCCCGC&CCGGGGGAACTGAAACATCTAAGTACCCCG	((((..(((((((((((((((.&.))))))))))..)))).....)..)))).	-25.1	No	No	Yes
109380_10	protein_coding	b0629	ybeF	660576	660604	-	ATGTTAGCGATTATTCCCAGCCGTTTTT	protein_coding	b4544	arnE	2372663	2372691	+	CGTGCTGTGGCTGGGACTGGCGCTGGCT	0	0	6	1	TGTTAGCGATTATTCCCAGCCG&TGGCTGGGACTGGCGCTGGCT	.(((((((.(((.((((((((.&.)))))))).)))))))))).	-28.7	Yes	No	No
1093917_1	inter	int-653-1	int-653-1	1216687	1216713	+	CTGTCGCTTTAGACTATACACAGCAT	protein_coding	b3598	yibI	3771697	3771730	-	TTTCGCGTTGGGAGTGCTGATCTTCGTCTTTCT	2.03126e-258	5.55763e-258	1	1	TAGACTATACACAGCAT&AGTGCTGATCTTCGTCTT	.((((......((((((&.))))))......)))).	-10.8	No	No	Yes
109430_10	tRNA	b3798	leuT	3982672	3982705	+	AAGTCCCCCCCCTCGCACCACGACTTTAAAGAA	rRNA	b3851	rrsA	4036282	4036310	+	ACGCTCAGGTGCGAAAGCGTGGGGAGCA	0	0	1	1	GTCCCCCCCCTCGCACCA&AGGTGCGAAAGCGTGGGGAG	.(((((((..(((((((.&.)))))))..).).))))).	-23	Yes	No	No
109432_21	protein_coding	b2507	guaA	2631849	2631875	-	ATCCGCGAGCAGGTAGGCGACGATAA	protein_coding	b3894	fdoG	4083908	4083976	-	CGACCTGCTTCGCGGAAGAGAACGGTTCTATCGTTAACTCAGGTCGCTGGTTACAGTGGCACTGGAAA	6.57524e-06	8.94133e-06	3	1	ATCCGCGAGCAGGTA&GACCTGCTTCGCGGAA	.(((((((((((((.&.))))))).)))))).	-24.5	No	Yes	No
109439_10	pseudogene	b4696	yneO	1594173	1594196	-	TATCCATAACAGCGGTGTGATGT	protein_coding	b4372	holD	4608139	4608177	+	CAAACCCAACGGCACGCGCCGCGTTATGGCAACAAATT	0.00108376	0.0013937	2	1	TCCATAACAGCGGTGTGATGT&GGCACGCGCCGCGTTATGGC	.(((((((.((((((((.(((&.)))))))))))))))))).	-25.7	Yes	No	No
1094566_1	protein_coding	b0156	erpA	176695	176744	+	GAATCTGAAATTACGCGTGTATATCACCGGTGGCGGTTGCAGCGGCTTC	rRNA	b0204	rrlH	226106	226165	+	TGCACATGCTGTGAGCTCGATGAGTAGGGCGGGACACGTGGTATCCTGTCTGAATATGG	4.86527e-18	7.63569e-18	1	1	AATTACGCGTGTATATCACCGGTGGCGGTTGCAGCGGCT&TGCACATGCTGTGAGCTCGATGAGTAGGGCGGGACACGTGGTATC	.((..(((((((...((((..((.(.(.((((((((((.&.))...)))))))).).).))..)).)).....)))))))..)).	-26.6	No	Yes	No
109470_19	protein_coding	b1205	ychH	1258800	1258880	+	AAAACGCTTCGTTACTCGGTAACGTGCTCATGGGGTTGGGTCTGGTGGTAATGGTGGTCGGCGTGGGGTATTCAATCCTC	rRNA	b4009	rrlE	4211216	4211247	+	ATGCGTTGTTGGGTAGGGGAGCGTTCTGTAA	1.82424e-40	3.26674e-40	1	1	AAACGCTTCGTTACTCGGTAACGTG&TGCGTTGTTGGGTAGGGGAGCGTTC	.((((((((.((((((((((((((.&.)))))))))))))).)))))))).	-28.9	No	Yes	No
109470_20	pseudogene	b4492-2	b4492-2	1471156	1471216	+	TTATGACGATAGTCTGGCAGCAAATACTCTGGTAGGGATGGCTGTTTATGAGCATGGTAC	3UTR	b4484	cpxP	4106327	4106388	+	TGTTTTCCTTGCCATAGACACCATCCCTGTCTTCCCCCACATGCTGTGGGGGTTTTTTTTA	4.93102e-139	1.16448e-138	26	1	TAGTCTGGCAGCAAATACTCTGGTAGGGATGGCTGTTTATGAGCATGGT&TCCTTGCCATAGACACCATCCCTGTCTTCCCCCACATGCTGTGGGGGTT	.(.(((.((((((........(((((((((((.((((((((.(((.((.&.)).)))))))))))))))))))).)).........)))))).))).).	-45.3	Yes	Yes	Yes
109476_1	ncRNA	b4698	mgrR	1622873	1622903	-	AGTGCAGGAAAATGCCTGTTAGCGTAAAAG	rRNA	b3971	rrfB	4171706	4171735	+	CGATGGTAGTGTGGGGTCTCCCCATGCGA	0	0	1	1	GTGCAGGAAAATGCCTGTTAGCGTA&GATGGTAGTGTGGGGTCTCCCCATGCGA	.((((((......(((.(((.(((.&.))).)))...)))......)).)))).	-11.4	Yes	No	No
109520_3	5UTR	b2288	nuoA	2405132	2405154	-	TTTTATTCCTCCCCATGAATCG	rRNA	b2591	rrsG	2730696	2730717	-	AGCGGGGAGGAAGGGAGTAAA	4.60147e-150	1.03927e-149	3	1	TTTTATTCCTCCCCA&CGGGGAGGAAGGGAGT	((((.(((((((((.&.))))))))).)))).	-19	No	Yes	No
1095251_1	tRNA	b2815	metW	2947518	2947553	+	GCTCGTCGGGCTCATAACCCGAAGGTCGTCGGTTC	rRNA	b3758	rrlC	3944614	3944641	+	CTGCGAATACCGGAGAATGTTATCACG	0	0	1	1	TCGTCGGGCTCATAACCCGAAGGTCGTCGGT&CTGCGAATACCGGAGAATGTTATCACG	.(((.((...(((...(((....(((.(((.&))))))....)))...)))...)))))	-11.8	No	No	Yes
1096059_1	3UTR	b3512	gadE	3659011	3659039	+	TATCCACCAGTAGAACCCTTCGTTGCCC	protein_coding	b3980	tufB	4176712	4176789	+	CTGGCGTTGAAATGTTCCGCAAACTGCTGGACGAAGGCCGTGCTGGTGAGAACGTAGGTGTTCTGCTGCGTGGTATC	1.02236e-85	2.15045e-85	3	1	TCCACCAGTAGAACCCTTCGTTGCCC&TGGTGAGAACGTAGGTGTTCTGCTGCGTGGT	.((((((((((((((((.(((((((.&.)))...)))).))).))))))))).)))).	-30.6	No	No	Yes
1096154_1	ncRNA	b4585	chiX	507216	507288	+	AAGTGACGGCATAATAATAAAAAAATGAAATTCCTCTTTGACGGGCCAATAGCGATATTGGCCATTTTTTTA	ncRNA	b4443	gcvB	2942815	2942901	+	AAGCTACCTTTTTTCACTTCCTGTACATTTACCCTGTCTGTCCATAGTGATTAATGTAGCACCGCCTAATTGCGGTGCTTTTTTTT	0	0	4	1	AAGTGACGGCATAATAATAAAAAAATGAAATTCCTCTTTGACGGGCCAATAGCGATATTGGC&TCCTGTACATTTACCCTGTCTGTCCATAGTGATTAATGTAGCACCGCCTAATTGCGGTGCTTT	((((.((.(((.............((..((((.((....(((((((.........(((.((.&.)).)))..........)))))))...)).)))).))...............))).)))))).	-15	Yes	Yes	Yes
1096318_1	inter	int-653-1	int-653-1	1216683	1216715	+	TTGTCTGTCGCTTTAGACTATACACAGCATAA	tRNA	b1984	asnW	2058027	2058102	-	TCCTCTGTAGTTCAGTCGGTAGAACGGCGGACTGTTAATCCGTATGTCACTGGTTCGAGTCCAGTCAGAGGAGCC	0	0	2	1	TGTCTGTCGCTTTAGACTATACACAGC&TCTGTAGTTCAGTCGGTAGAACGGCGGACT	.((((((((.((((((((..((((((.&.)))).))..))))..)))).)))))))).	-22.5	No	No	Yes
1096320_1	inter	int-653-1	int-653-1	1216683	1216714	+	TTGTCTGTCGCTTTAGACTATACACAGCATA	tRNA	b1989	asnV	2062260	2062334	+	CCTCTGTAGTTCAGTCGGTAGAACGGCGGACTGTTAATCCGTATGTCACTGGTTCGAGTCCAGTCAGAGGAGCC	0	0	1	1	TGTCTGTCGCTTTAGACTATACACAGC&TCTGTAGTTCAGTCGGTAGAACGGCGGACT	.((((((((.((((((((..((((((.&.)))).))..))))..)))).)))))))).	-22.5	No	No	Yes
1096394_1	ncRNA	b4585	chiX	507215	507287	+	AAAGTGACGGCATAATAATAAAAAAATGAAATTCCTCTTTGACGGGCCAATAGCGATATTGGCCATTTTTTT	tRNA	b1989	asnV	2062259	2062322	+	TCCTCTGTAGTTCAGTCGGTAGAACGGCGGACTGTTAATCCGTATGTCACTGGTTCGAGTCCA	0	0	2	1	AAGTGACGGCATAATAATAAAAAAATGAAATTCCTCTTTGACGGGCCAATAGCGATA&AGTCGGTAGAACGGCGGACTGTTAATCCGTATGTCACTG	.(((((((((...........................((((((((((..((.((((.&.)))).))....)))...)))))))...)).))))))).	-20.2	No	Yes	Yes
1096753_1	protein_coding	b0440	hupB	461543	461577	+	GTAACTGAATCTCTGAAAGAAGGGGATGATGTAG	protein_coding	b0683	fur	710229	710253	-	CACTGTGCCGAAGGCGATTGCCGC	2.04814e-83	4.27932e-83	1	1	GAATCTCTGAAAGAAGGGGATGA&CACTGTGCCGAAGGCGATTG	.((((.((....(..(.((.((.&)))).)..)...)).)))).	-5.6	No	No	Yes
1096939_1	inter	int-1767	int-1767	3657985	3658055	-	TGTAATCCGATTTAAATATCGAGTCTCCTTGTTTCGACTTAAGCTGGCAATTGGATTGCCAGCTTTCTTT	rRNA	b3854	rrlA	4038379	4038450	+	GAGCACTGTTTCGGCAAGGGGGTCATCCCGACTTACCAACCCGATGCAAACTGCGAATACCGGAGAATGTT	0	0	3	1	GTCTCCTTGTTTCGACTTAAGCTGGCAATTGGATTGCCAGCTTTCTT&CGGCAAGGGGGTCATCCCGACTTACCAACCCGATGCAAACTGCGAATACCGGAGAA	.(((((....((((......(((((.((((((..((((..(((.((.&.)).)))..)).))..)))).)).))).......))......))))....))))).	-22.8	No	Yes	Yes
1097023_1	ncRNA	b4704	arrS	3657983	3658054	-	GTAATCCGATTTAAATATCGAGTCTCCTTGTTTCGACTTAAGCTGGCAATTGGATTGCCAGCTTTCTTTTA	rRNA	b4009	rrlE	4210890	4210971	+	ATCTCCGGGGGTAGAGCACTGTTTCGGCAAGGGGGTCATCCCGACTTACCAACCCGATGCAAACTGCGAATACCGGAGAAT	0	0	5	1	GTAATCCGATTTAAATATCGAGTCTCCTTGTTTCGACTTAAGCTGGCAATTGGAT&CTCCGGGGGTAGAGCACTGTTTCGGCAAGGGGGTCATCCCGACTTACCAACCCGATGCAAACTGCGAATACC	(((.((((.(((...(((((.(((((((((((..(((....(((.((..(((((.&.)))))..))..)))...)))..))))))))).................)).))))).))).)).)).))).	-27	Yes	Yes	Yes
1097205_1	protein_coding	b0093	ftsQ	103449	103506	+	TAGAACAACGCCTGCCGTGGATTAAGCAGGTGAGCGTCAGAAAGCAGTGGCCTGATG	3UTR	b0847	ybjL	887975	888057	-	GCCACTGCTTTTCTTTGATGTCCCCATTTTGTGGAGCCCATCAACCCCGCCATTTCGGTTCAAGGTTGATGGGTTTTTTGTT	0	0	5	1	GAACAACGCCTGCCGTGGATTAAGCAGGTGAGCGTCAGAAAGCAGTGGCC&GCCACTGCTTTTCTTTGATGTCCCCATTTTGTGGAGCCCATCAACCCCGCCATTTCGGTTCAAGGTTGATGGGTTTTTTGTT	.(((((.(((((((.((((((.....((((.((((((((((((((((((.&))))))))))))...))))))..........................)))).....)))))).)))....))))...)))))	-39.8	Yes	Yes	No
1097365_1	protein_coding	b1831	proQ	1915520	1915540	-	AATTTCATGGAAAATCAACC	ncRNA	b3864	spf	4049938	4049987	+	TACTTCACGTAATCGGATTTGGCTGAATATTTTAGCCGCCCCAGTCAGT	5.53517e-109	1.23672e-108	1	1	TTTCATGGAAAATCA&GGATTTGGCTGAAT	.((((.(..(((((.&.)))))..))))).	-5.9	No	Yes	No
1098169_1	ncRNA	b4585	chiX	507222	507288	+	CGGCATAATAATAAAAAAATGAAATTCCTCTTTGACGGGCCAATAGCGATATTGGCCATTTTTTTA	antisense_protein_coding	antisense-b1146	antisense-b1146	1203125	1203189	-	ATTTCGTAATTGCACCTGATGTGTATTGCTCAAGTTTTTTAGCCAGCACAAAACTGGCTTTTTT	0	0	1	1	CGGCATAATAATAAAAAAATGAAATTCCTCTTTGACGGGCCAATAGCGAT&TTCGTAATTGCACCTGATGTGTATTGCTCAAGTTTTTTAGCCA	.(((.........(((((((...............((((.((((.((((.&.)))).))))..))))...............))))))).))).	-14.7	No	Yes	No
1098582_1	ncRNA	b4443	gcvB	2942695	2942901	+	ACTTCCTGAGCCGGAACGAAAAGTTTTATCGGAATGCGTGTTCTGGTGAACTTTTGGCTTACGGTTGTGATGTTGTGTTGTTGTGTTTGCAATTGGTCTGCGATTCAGACCATGGTAGCAAAGCTACCTTTTTTCACTTCCTGTACATTTACCCTGTCTGTCCATAGTGATTAATGTAGCACCGCCTAATTGCGGTGCTTTTTTTT	ncRNA	b3864	spf	4049897	4049989	+	CGTAGGGTACAGAGGTAAGATGTTCTATCTTTCAGACCTTTTACTTCACGTAATCGGATTTGGCTGAATATTTTAGCCGCCCCAGTCAGTAA	0	0	59	1	CCTGAGCCGGAACGAAAAGTTTTATCGGAATGCGTGTTCTGGTGAACTTTTGGCTTACGGTTGTGATGTTGTGTTGTTGTGTTTGCAATTGGTCTGCGATTCAGACCATGGTAGCAAAGCTACCTTTTTTCACTTCCTGTACATTTACC&CGTAGGGTACAGAGGTAAGATGTTCTATCTTTCAGACCTTTTACTTCACGTAATCGGATTTGGCTGAATATTTTAGCCGCCCCAGTCAGT	.((((...((...............(((.....((((((.(((.((..(((((.((((((..((((........................((((((.((...(((...(((.((((....(((((...........((((((.(((((.&.))))))))))))))))...))))))))))))))))))..))))..).)))))))))).)).))))))))).....))).))...)))).	-45.3	Yes	Yes	Yes
1098710_1	tRNA	b0206	aspU	228984	229007	+	GAGTCCCGTCCGTTCCGCCACTT	rRNA	b2591	rrsG	2731039	2731062	-	TGACGAGTGGCGGACGGGTGAGT	0	0	1	1	CCGTCCGTTCCGCCACTT&CGAGTGGCGGACGGGTGA	.((((((.((((((((((&.)))))))))))))))).	-25.4	No	Yes	No
10992_75	rRNA	b2589	rrlG	2727718	2727782	-	ACTTGGTGTTACTGCGAAGGGGGGACGGAGAAGGCTATGTTGGCCGGGCGACGGTTGTCCCGGT	protein_coding	b3364	tsgA	3493710	3493745	+	AGCCGTCACCGTCAGCATAACACCCTGACCTCTCA	0.0100806	0.0123903	1	1	AGGGGGGACGGAGAAGGCTATGTTGGCCGGGCGACGGTTG&AGCCGTCACCGTCAGCATAACACCCTGACCTCTCA	.((((((.(((....((.(((((((((..((.(((((((.&))))))).)))))))))))...))))).)))))).	-35.5	No	No	Yes
1099303_1	inter	int-2763	int-2763	1151912	1151930	-	TCCAGGGAGGGAAAAAAT	protein_coding	b4373	rimI	4608264	4608281	+	GAGTGAAAAAACGTTTG	0	0	1	1	GGGAGGG&ACGTTTG	.(((.(.&.).))).	-1	No	No	Yes
1099851_1	antisense_pseudogene	antisense-b1368	antisense-b1368	1426850	1426883	-	CGATCTTGTCCAGCATTCTTTGAAAGGCCTGAG	tRNA	b3761	trpT	3947003	3947067	+	TGGGAGTTCGAGTCTCTCCGCCCCTGCCAGAAATCATCCTTAGCGAAAGCTAAGGATTTTTTTT	6.48725e-148	1.55251e-147	1	1	TGTCCAGCATTCTTTGAAAGGCCTGAG&TCTCCGCCCCTGCCAGAAATCATCCTTAGCGAAAGCTAAGGATT	.(((((((.(((((((..(((...(((&.)))....)))..)))).............))).)))..)))).	-12.1	No	Yes	No
110008_1	5UTR	b2573	rpoE	2710059	2710081	-	CAAATTGCAGCTAATGGAGTGG	3UTR	b4484	cpxP	4106331	4106370	+	TTCCTTGCCATAGACACCATCCCTGTCTTCCCCCACATG	0	0	1	1	TGCAGCTAATGGAGTG&GACACCATCCCTGTC	.((((...((((.((.&.)).))))..)))).	-7.8	No	No	Yes
110071_11	rRNA	b0204	rrlH	228398	228443	+	GGGGGCTGCTCCTAGTACGAGAGGACCGGAGTGGACGCATCACTG	ncRNA	b0455	ffs	476486	476524	+	CCAGGTCAGGTCCGGAAGGAAGCAGCCAAGGCAGATGA	0	0	1	1	GGGCTGCTCCTAGTACGAGAGGACCGGAGTGGA&CCAGGTCAGGTCCGGAAGGAAGCAGCCA	.((((((((((.........(((((.((.(((.&)))..)).)))))...)))).)))))).	-29.3	No	Yes	No
1101017_1	rRNA	b0204	rrlH	228003	228023	+	GACTGGGGCGGTCTCCTCCT	protein_coding	b1983	yeeN	2056838	2056875	+	TTTCGAGGAGATCATTCCAGTGGGACGTAAATGGGCC	3.85637e-12	5.74247e-12	1	1	GACTGGGGCGGTCTCCTCC&CGAGGAGATCATTCCAGTG	.(((((((.(((((((((.&.))))))))).))))))).	-26.5	No	No	Yes
1101427_1	ncRNA	b4585	chiX	507224	507287	+	GCATAATAATAAAAAAATGAAATTCCTCTTTGACGGGCCAATAGCGATATTGGCCATTTTTTT	inter	int-1584	int-1584	3266041	3266098	-	TCCACCTGTCTGTCTTGCAGGTGTCGGTTACGGTTACCTACATATTTAATTCAGGCG	1.41755e-100	3.10166e-100	1	1	ATGAAATTCCTCTTTGACGGGCCAATAGCGATATTGGCC&TGCAGGTGTCGGTTACGGTTACCTACATATTTAATTCAG	.((((..............((((...(.(((((((.((.&.)).))))))).)...))))..............)))).	-15.1	Yes	No	No
110143_19	protein_coding	b0838	gstB	880476	880519	-	CTGTTCAGCCTGTGGCTGCCTGTCGGAAAAGGGGTGAGTATGA	protein_coding	b2821	ptrA	2958865	2958890	-	CCGTGAATGCCCCGCAGCACCTGGT	0.0367845	0.0433524	1	1	AGCCTGTGGCTGCCTGTCGGAAAAGGGGTGAGTATGA&CCGTGAATGCCCCGCAGCACCTGGT	.(((....(((((...........(((((...((((.&.))))...))))))))))....)))	-21.7	No	Yes	No
1101490_1	inter	int-409	int-409	774663	774692	-	CGATTGAGGTTTGGGAATGAGGGCAAGTT	protein_coding	b3709	tnaB	3890505	3890533	+	ATTACCGTTGCCTTCGTTCTCTATATCC	1.08131e-07	1.52628e-07	2	1	AGGTTTGGGAATGAGGGCAAG&GTTGCCTTCGTTCTCTATATCC	.(((.(((((((((((((((.&.)))))))))))).))).))).	-22.1	No	Yes	No
1101633_1	tRNA	b1989	asnV	2062275	2062334	+	CGGTAGAACGGCGGACTGTTAATCCGTATGTCACTGGTTCGAGTCCAGTCAGAGGAGCC	ncRNA	b4704	arrS	3657983	3658054	-	GTAATCCGATTTAAATATCGAGTCTCCTTGTTTCGACTTAAGCTGGCAATTGGATTGCCAGCTTTCTTTTA	0	0	2	1	GTAGAACGGCGGACTGTTAATCCGTATGTCACTGGTTCGAGTCCAGTCAGAGGAGCC&AGTCTCCTTGTTTCGACTTAAGCTGGCAATTGGATTGCCAGCTTTCTTTTA	.(((((.((.((.(((.(((((((..((((...((((.(((((......(((((((.&.).)))))).....))))).))))))))..))))))).))))).)))))))	-31.3	Yes	No	Yes
1101736_1	protein_coding	b0572	cusC	595705	595722	+	CACTCAGCCAGAACGGC	tRNA	b1977	asnT	2044569	2044591	+	GAACGGCGGACTGTTAATCCGT	0	0	1	1	CACTCAGCCA&CGGCGGACTGT	((.((.(((.&.))).)).)).	-6.8	No	No	Yes
1101743_1	ncRNA	b4432	ryeA	1923086	1923159	+	AAGGTCGGAACTACTCGAT	tRNA	b1984	asnW	2058027	2058099	-	TCCTTGTCGGGTAAGTTCCGACCTGCA	0	0	2	1	AAGGTCGGAACTACTCGAT&TGTCGGGTAAGTTCCGACCTG	.((((((((((((((((((&.)))))))).)))))))))).	-29	No	Yes	Yes
1101746_1	protein_coding	b0993	torS	1053329	1053441	-	AAGGTCGGAACTACTCGAT	protein_coding	b1620	malI	1699002	1699037	-	TCCTTGTCGGGTAAGTTCCGACCTGCA	0.0307921	0.036583	1	1	AAGGTCGGAACTACTCGAT&TGTCGGGTAAGTTCCGACCTG	.((((((((((((((((((&.)))))))).)))))))))).	-29	No	Yes	No
110178_21	inter	int-635	int-635	1201220	1201255	-	AAGGTCGGAACTACTCGAT	protein_coding	b2523	pepB	2655866	2655891	-	TCCTTGTCGGGTAAGTTCCGACCTGCA	0	0	4	1	AAGGTCGGAACTACTCGAT&TGTCGGGTAAGTTCCGACCTG	.((((((((((((((((((&.)))))))).)))))))))).	-29	No	Yes	No
11017_362	protein_coding	b1493	gadB	1572000	1572019	-	CGGTAGAACGGCGGACTGTTAATCCGTATGTCACTGGTTCGAGTCCAGTCAGAGGAGCC	rRNA	b3275	rrlD	3424817	3424844	-	GTAATCCGATTTAAATATCGAGTCTCCTTGTTTCGACTTAAGCTGGCAATTGGATTGCCAGCTTTCTTTTA	4.17746e-39	6.88146e-39	1	1	GTAGAACGGCGGACTGTTAATCCGTATGTCACTGGTTCGAGTCCAGTCAGAGGAGCC&AGTCTCCTTGTTTCGACTTAAGCTGGCAATTGGATTGCCAGCTTTCTTTTA	.(((((.((.((.(((.(((((((..((((...((((.(((((......(((((((.&.).)))))).....))))).))))))))..))))))).))))).)))))))	-31.3	No	Yes	Yes
1101843_1	rRNA	b0204	rrlH	228001	228020	+	TTGACTGGGGCGGTCTCCT	5UTR	b3251	mreB	3401105	3401132	-	AGCGGATTTTCTTTTCCGCCCCAGCTT	9.17803e-54	1.73723e-53	1	1	ACTGGGGCGGTCTCCT&CGGATTTTCTTTTCCGCCCCAGC	.(((((((((..(((.&.))).........))))))))).	-21.6	No	Yes	No
1101845_1	5UTR	b3251	mreB	3401105	3401131	-	GCGGATTTTCTTTTCCGCCCCAGCTT	rRNA	b3854	rrlA	4039762	4039781	+	TTGACTGGGGCGGTCTCCT	2.70794e-52	5.10759e-52	1	1	CGGATTTTCTTTTCCGCCCCAGC&ACTGGGGCGGTCTCCT	.(((.........(((((((((.&.)))))))))..))).	-21.6	No	Yes	No
1102684_1	protein_coding	b0097	secM	107763	107793	+	CTTATTAGGGATGGTTGCGGCGAGTTTAGG	3UTR	b4484	cpxP	4106330	4106372	+	TTTCCTTGCCATAGACACCATCCCTGTCTTCCCCCACATGCT	5.94395e-275	1.66453e-274	26	1	TTAGGGATGGTTGCGGCGAGT&CCTTGCCATAGACACCATCCCTGT	.((((((((((((.((((((.&.)))))).))...)))))))))).	-25.6	Yes	Yes	Yes
1102758_1	protein_coding	b1119	nagK	1179433	1179501	+	GCATTGAACGCGCGCGCCACGGTGATGCGGGAGGAATGCGTGGTGCGGCCTTCCTACATCTAACCGAT	rRNA	b4009	rrlE	4211072	4211134	+	GATGTGGGAAGGCCCAGACAGCCAGGATGTTGGCTTAGAAGCAGCCATCATTTAAAGAAAGC	0.0307535	0.036583	1	1	CGGTGATGCGGGAGGAATGCGTGGTGCGGCCTTCCTACATCT&GATGTGGGAAGGCCCAGACAGCCAGGATGTTGGCTTAGAAGCAGCCATCA	.((((.(((..(((.(((((.((((..((((((((((((((.&))))))))))))))......)))).).))))..)))....)))..)))).	-41.8	No	Yes	No
1102759_1	protein_coding	b1119	nagK	1179433	1179501	+	GCATTGAACGCGCGCGCCACGGTGATGCGGGAGGAATGCGTGGTGCGGCCTTCCTACATCTAACCGAT	rRNA	b3758	rrlC	3944733	3944795	+	GATGTGGGAAGGCCCAGACAGCCAGGATGTTGGCTTAGAAGCAGCCATCATTTAAAGAAAGC	0.0366298	0.0432175	1	1	CGGTGATGCGGGAGGAATGCGTGGTGCGGCCTTCCTACATCT&GATGTGGGAAGGCCCAGACAGCCAGGATGTTGGCTTAGAAGCAGCCATCA	.((((.(((..(((.(((((.((((..((((((((((((((.&))))))))))))))......)))).).))))..)))....)))..)))).	-41.8	No	Yes	No
110468_19	antisense_ncRNA	antisense-b4577	antisense-b4577	77553	77574	-	AATCTGCTGGCGGGTGATTTT	protein_coding	b0683	fur	710431	710474	-	TACTGAACCAGTTTGACGACGCTGGTATCGTCACCCGCCACAA	0.0021781	0.00276734	8	1	CTGCTGGCGGGTGATT&CGTCACCCGCCACAA	.((.(((((((((((.&.))))))))))))).	-22.9	No	Yes	No
1104901_1	protein_coding	b0006	yaaA	5764	5790	-	CTGACCAAACCAGAGCAACTGACTGG	tRNA	b3976	thrU	4175408	4175438	+	GAGCAACTGACTTGTAATCAGTAGGTCACC	7.91351e-06	1.07359e-05	1	1	AGAGCAACTGAC&ATCAGTAGGTCA	.((.(.(((((.&.))))).).)).	-8.9	No	No	Yes
1104988_1	protein_coding	b2965	speC	3108152	3108183	-	AGCTCGCCGCTGCTGTTAGAACTTAACGAAA	rRNA	b3970	rrlB	4168873	4168898	+	TTCCCCCAGTAGCGGCGAGCGAACG	5.38657e-07	7.50023e-07	1	1	AGCTCGCCGCTGCTGTTAGAAC&TTCCCCCAGTAGCGGCGAGCG	.((((((((((((((...(((.&)))...)))))))))))))).	-31.2	No	No	Yes
110509_1	antisense_protein_coding	antisense-b3500	antisense-b3500	3647480	3647498	-	CTCTTCCGATCCAACGCA	protein_coding	b3926	glpK	4116548	4116568	-	CGTCGTTCTTCCGAAGTATA	0	0	1	1	TCTTCCGATCCAACGCA&CGTCGTTCTTCCGAAGT	.((((.((...(((((.&.).))))..)).)))).	-6.8	Yes	No	No
1105134_1	rRNA	b3275	rrlD	3425849	3425941	-	GAATTCATCTCCGGGGGTAGAGCACTGTTTCGGCAAGGGGGTCATCCCGACTTACCAACCCGATGCAAACTGCGAATACCGGAGAATGTTAT	ncRNA	b4704	arrS	3657983	3658054	-	GTAATCCGATTTAAATATCGAGTCTCCTTGTTTCGACTTAAGCTGGCAATTGGATTGCCAGCTTTCTTTTA	0	0	6	1	CTCCGGGGGTAGAGCACTGTTTCGGCAAGGGGGTCATCCCGACTTACCAACCCGATGCAAACTGCGAATACC&GTAATCCGATTTAAATATCGAGTCTCCTTGTTTCGACTTAAGCTGGCAATTGGAT	.(((((..((..(((...(((..(((((((((.................((.(((((.(((.((.((.(((.&))).)))).)))...))))).)))))))))))..)))....))).))..))))).	-27	Yes	Yes	Yes
1105198_1	protein_coding	b2312	purF	2428676	2428742	-	CGAAATGCATAACGAAGGATGATGCCTTCGCTGAGGGTGCCGGTCTGGCACCCTGACTTGCAACTC	rRNA	b3854	rrlA	4038379	4038434	+	GAGCACTGTTTCGGCAAGGGGGTCATCCCGACTTACCAACCCGATGCAAACTGCG	0.000291872	0.000381753	1	1	ATGCATAACGAAGGATGATGCCTTCGCTGAGGGTGCCG&GAGCACTGTTTCGGCAAGGGGGTCATCCCGACTTACCAACCCGATGCAA	.(((((..((..(((((((.((((.((((((((((((.&).)))))..)))))).)))).))))))))).............))))).	-34.7	No	No	Yes
1105239_1	pseudogene	b4661	yfcU	2454439	2454461	-	CAAACACGACACGAAGAAAATG	ncRNA	b4443	gcvB	2942800	2942835	+	CAGACCATGGTAGCAAAGCTACCTTTTTTCACTTC	3.13842e-54	5.94944e-54	2	1	CGAAGAAAA&CTTTTTTCA	.(((((((.&.))))))).	-4.9	No	No	Yes
1105243_1	inter	int-4287	int-4287	4044096	4044114	-	TGTATTTATATTTATTAA	rRNA	b3970	rrlB	4169501	4169556	+	GAGCACTGTTTCGGCAAGGGGGTCATCCCGACTTACCAACCCGATGCAAACTGCG	0	0	1	1	TGTATTT&CGATGCAA	((((((.&.)))))).	-4.3	No	No	Yes
1105246_1	ncRNA	b4704	arrS	3657984	3658054	-	GTAATCCGATTTAAATATCGAGTCTCCTTGTTTCGACTTAAGCTGGCAATTGGATTGCCAGCTTTCTTTT	rRNA	b3970	rrlB	4169501	4169571	+	GAGCACTGTTTCGGCAAGGGGGTCATCCCGACTTACCAACCCGATGCAAACTGCGAATACCGGAGAATGT	0	0	3	1	GTCTCCTTGTTTCGACTTAAGCTGGCAATTGGATTGCCAGCTTTCTT&CGGCAAGGGGGTCATCCCGACTTACCAACCCGATGCAAACTGCGAATACCGGAGAA	.(((((....((((......(((((.((((((..((((..(((.((.&.)).)))..)).))..)))).)).))).......))......))))....))))).	-22.8	Yes	Yes	Yes
110541_20	protein_coding	b0431	cyoB	449984	450012	-	TACCATTCTGAAGATGCGCGCACCGGGC	ncRNA	b4450	arcZ	3350642	3350681	+	TTCCCTGGTGTTGGCGCAGTATTCGCGCACCCCGGTCTA	3.63228e-10	5.29634e-10	5	1	CTGAAGATGCGCGCACCGGGC&CCCTGGTGTTGGCGCAGTATTCGC	.((((..(((((((((((((.&.))))))))..)))))...)))).	-24.6	No	No	Yes
110572_1	3UTR	b0655	gltI	686786	686824	-	GGCGGAAATTCCAGCCCTCTCGATTGTTACGTAGCACG	ncRNA	b4432	ryeA	1923097	1923126	+	ACAGATAAAAAGAGACCGAACACGATTCC	0	0	1	1	CGGAAATTCCAGCCCTCTCGATTGTTA&AGATAAAAAGAGACCGAACACGATTCC	.((((..........((((..(((((.&.)))))...))))..........))))	-7.9	No	No	Yes
1106194_1	inter	int-2500-1	int-2500-1	576992	577021	+	TCTTGGCTGAATAAAAATAAATCTATTAG	rRNA	b3758	rrlC	3944564	3944619	+	GAGCACTGTTTCGGCAAGGGGGTCATCCCGACTTACCAACCCGATGCAAACTGCG	8.07485e-59	1.55469e-58	1	1	TCTTGGCTGAAT&TTTCGGCAAGGGG	((((.((((((.&.)))))).)))).	-9.7	No	Yes	No
110673_21	protein_coding	b0162	cdaR	182451	182483	+	ACGGAGGACTTATGGCTGGCTGGCATCTTGAT	5UTR	b3298	rpsM	3442553	3442577	-	CTAGATTAGCCAGCCAATCTTTTG	1.90685e-20	3.04942e-20	3	1	ACGGAGGACTTATGGCTGGCTGGCATCTT&TAGATTAGCCAGCCAATCTTTTG	.(((((((....((((((((((..((((.&.)))))))))))))).)))))))	-24.1	No	Yes	No
1106970_1	ncRNA	b4432	ryeA	1923084	1923171	+	CTTCTGGCTTTTAACAGATAAAAAGAGACCGAACACGATTCCTGTATTCGGTCCAGGGAAATGGCTCTTGGGAGAGAGCCGTGCGCT	ncRNA	b4445	omrB	2976346	2976386	-	TCCCAGAGGTATTGATAGGTGAAGTCAACTTCGGGTTGAG	0	0	9	1	ACCGAACACGATTCCTGTATTCGGTCCAGGGAAATGGCTCTTGGGAG&TCCCAGAGGTATTGATAGGTGAAGTCAACTTCGGG	.(((((...(((((((((..............((((.(((.(((((.&)))))))).)))).)))))...))))...))))).	-23.6	Yes	Yes	Yes
1106971_1	ncRNA	b4445	omrB	2976346	2976386	-	TCCCAGAGGTATTGATAGGTGAAGTCAACTTCGGGTTGAG	inter	int-1767	int-1767	3657983	3658055	-	TGTAATCCGATTTAAATATCGAGTCTCCTTGTTTCGACTTAAGCTGGCAATTGGATTGCCAGCTTTCTTTTA	0	0	22	1	CCCAGAGGTATTGATAGGTGAAGTCAACTTCGGGTTGA&GTAATCCGATTTAAATATCGAGTCTCCTTGTTTCGACTTAAGCTGGC	.((((((((...((((((.(((.((....((((((((.&.))))))))..........)).).))))))))...))))...)))).	-19	Yes	Yes	Yes
1107038_1	inter	int-1038	int-1038	2001875	2001892	-	AACCCCCAAATAACCCC	ncRNA	b4445	omrB	2976360	2976383	-	CAGAGGTATTGATAGGTGAAGTC	0	0	1	1	AACCCCCAAATAACCC&AGGTATTGATAGGTG	.(((....(((.(((.&.))))))....))).	-6	No	No	Yes
1107088_1	5UTR	b0654	gltJ	686706	686736	-	TACGCTGGGTAACAATCTTCGAGGGTAGCA	protein_coding	b0839	dacC	881420	881465	+	ATGGCATGAAGACAGGAACCACGGCAGGCGCGGGATATAATCTGG	1.74123e-12	2.60317e-12	1	1	CGCTGGGTAACAATCTTCGAGG&GCATGAAGACAGGAACCACGGCA	.(((((((..(..((((((.(.&.).))))))..)..))).)))).	-17.5	No	Yes	No
1107159_1	ncRNA	b4444	omrA	2976101	2976167	-	ATTATTCGGTACGCTCTTCGTACCCTGTCTCTTGCACCAACCTGCGCGGATGCGCAGGTTTTTTTT	tRNA	b3799	proM	3982705	3982792	+	TTGAACTAAAAATTCAAAAAGCAGTATTTCGGCGAGTAGCGCAGCTTGGTAGCGCAACTGGTTTGGGACCAGTGGGTCGGAGGTTCG	0	0	2	1	CGCTCTTCGTACCCTGTCTCTTGCACCAACCTGCGCGGATGCGCAGGTTTTTTT&CAAAAAGCAGTATTTCGGCGAGTAGCGCAGCTTGGTAGCGCAACTGGTTTGGGACCAGTGGGTCGGAGGTT	.((.(((((..((((((((((((((((((.((((((.....(((..(((((((.&.))))))).........)))....)))))).)))))...)))).......))))).)).))..))))))).	-43.9	No	Yes	No
1107187_1	ncRNA	b4445	omrB	2976345	2976385	-	CCCAGAGGTATTGATAGGTGAAGTCAACTTCGGGTTGAGC	ncRNA	b3864	spf	4049906	4050005	+	CAGAGGTAAGATGTTCTATCTTTCAGACCTTTTACTTCACGTAATCGGATTTGGCTGAATATTTTAGCCGCCCCAGTCAGTAATGACTGGGGCGTTTTT	0	0	11	1	CCCAGAGGTATTGATAGGTGAAGTCAACTTCGGGTTGAGC&ACGTAATCGGATTTGGCTGAATATTTTAGCCGCCCCAGTCAGTAATGACTGGGG	(((((...(((((((.((((.((((((..((.(((((.(.&.).))))).)).))))))............))))...)))))))....))))).	-28.3	Yes	Yes	Yes
1107272_1	rRNA	b0201	rrsH	224560	224591	+	GATACCCTGGTAGTCCACGCCGTAAACGATG	ncRNA	b4445	omrB	2976360	2976383	-	CAGAGGTATTGATAGGTGAAGTC	0	0	1	1	GATACCCTGG&CAGAGGTATTG	(((((((((.&))).)))))).	-10.3	No	No	Yes
11074_357	5UTR	b1661	cfa	1741257	1741290	+	TCACTATGGATAGTCATTTCGGCAAGGGTTCCT	3UTR	b4484	cpxP	4106348	4106367	+	CATCCCTGTCTTCCCCCAC	0	0	17	1	CGGCAAGGGT&TCCCTGTCT	.(((.((((.&.))))))).	-9	No	Yes	Yes
1107579_1	protein_coding	b1641	slyB	1720035	1720101	+	AGGGCGGTGATGATTCCAACGTTATCGGTGCAATTGGCGGTGCTGTTCTTGGTGGTTTCCTGGGGA	tRNA	b4270	leuX	4496383	4496439	+	TTTTCCGCATACCTCTTCAGTGCCGAAGTGGCGAAATCGGTAGACGCAGTTGATTC	0	0	1	1	CCAACGTTATCGGTGCAATTGGCGGTGCTGTTCTTGGTGGTTTCCTGGGGA&TTCCGCATACCTCTTCAGTGCCGAAGTGGCGAAATCGGTAGACGCAGTTGA	.(((((((((((((((.(((..((((((((.....((((......((.(((&.))).))))))....)))))))).))).))...)))))))...)).)))).	-31.2	Yes	No	No
1107604_1	ncRNA	b4445	omrB	2976361	2976378	-	GTATTGATAGGTGAAGT	protein_coding	b3210	arcB	3350666	3350734	-	CGTAGAAGTGCTGAAAGCGTGGGTGGCAAAAGCCACTAAAAAATGACCCCGGCTAGACCGGGGTGCGC	0	0	1	1	GTATTGATAGGTGAAGT&GGCTAGACCGGGGTGCG	(((((....(((..(((&.)))..)))..))))).	-9.9	No	No	Yes
110791_19	protein_coding	b1493	gadB	1571341	1571384	-	AACCGCTGCACGATGCGCTGGATAAATTCCAGGCCGATACCGG	antisense_protein_coding	antisense-b3517	antisense-b3517	3666894	3666913	+	TTATCCAGCGCATCGTGCA	0	0	3	1	CTGCACGATGCGCTGGATAAA&TTATCCAGCGCATCGTGCA	.(((((((((((((((((((.&)))))))))))))))))))	-36	No	No	Yes
1108137_1	ncRNA	b4443	gcvB	2942696	2942832	+	CTTCCTGAGCCGGAACGAAAAGTTTTATCGGAATGCGTGTTCTGGTGAACTTTTGGCTTACGGTTGTGATGTTGTGTTGTTGTGTTTGCAATTGGTCTGCGATTCAGACCATGGTAGCAAAGCTACCTTTTTTCAC	ncRNA	b4444	omrA	2976100	2976168	-	GATTATTCGGTACGCTCTTCGTACCCTGTCTCTTGCACCAACCTGCGCGGATGCGCAGGTTTTTTTTC	0	0	4	1	CGAAAAGTTTTATCGGAATGCGTGTTCTGGTGAACTTTTGGCTTACGGTTGTGATGTTGTGTTGTTGTGTTTGCAATTGGTCTGCGATTCAGACCATGGTAGCAAAGCTACCT&CGGTACGCTCTTCGTACCCTGTCTCTTGCACCAACCTGCGCGGATGCGCAGGTTTTTTTTC	.((((((....(((....(((((((((..(((..............(((((.(.............................(((((...((((...((((..(((((((((.&.)))).))).))..))))..)))).))))))))))))))..))))))))))))..))))))	-34.1	Yes	Yes	No
1108143_1	ncRNA	b4432	ryeA	1923079	1923149	+	AAATGCTTCTGGCTTTTAACAGATAAAAAGAGACCGAACACGATTCCTGTATTCGGTCCAGGGAAATGGC	protein_coding	b2514	hisS	2639720	2639755	-	ACAGTCTCGGCTCCCAGGGCACCGTGTGTGCAGGC	5.66694e-203	1.46102e-202	1	1	TCCTGTATTCGGTCCAGGGAAATGGC&CTCGGCTCCCAGGGCACCGTGTGTGCAGGC	.(((((((.((((((.((((..(((.&.)))..))))..)).))))...))))))).	-24.5	No	Yes	No
1108187_1	5UTR	b3251	mreB	3401105	3401132	-	AGCGGATTTTCTTTTCCGCCCCAGCTT	rRNA	b4009	rrlE	4212285	4212304	+	TTGACTGGGGCGGTCTCCT	1.72209e-58	3.30883e-58	1	1	CGGATTTTCTTTTCCGCCCCAGC&ACTGGGGCGGTCTCCT	.(((.........(((((((((.&.)))))))))..))).	-21.6	No	Yes	No
1108448_1	3UTR	b1805	fadD	1888018	1888035	-	GTTAATCCGGCGTTTTT	inter	int-3135-1	int-3135-1	1896791	1896856	+	ATCGCAATATTAGTTAAATCGCGGTTTTTGATTAGTTTAATTCATGTGAATAGTTAAGCCAGTCG	1.35733e-06	1.8736e-06	1	1	GTTAATCCGGCGTTTTT&TAAATCGCGGTTTTTGATTAGT	.(((((((.(((.(((.&.))).))).).....)))))).	-6.5	No	Yes	No
1108584_1	ncRNA	b4443	gcvB	2942780	2942840	+	TTTGCAATTGGTCTGCGATTCAGACCATGGTAGCAAAGCTACCTTTTTTCACTTCCTGTA	protein_coding	b4167	nnr	4394330	4394402	+	AGGTCACGTTGTTGGCCCAGGAGAGCGACAAACCGTTGCCGGAAGAGGCCGCGCTGGCACGCGAAGCATGGT	2.013e-177	5.0158e-177	1	1	TTTGCAATTGGTCTGCGATTCAGACCATGGTAGCAAAGCTACCTTTTTTCACTTCCTGT&CCAGGAGAGCGACAAACCGTTGCCGGAAGAGGCCGCGCTGGCACGCGAAG	(((((.....(((.(((..........(((((((..........(((.((.(((((((.&.))))).)).)).)))..)))))))..........))).)))..))))).	-25	Yes	No	No
1109092_1	ncRNA	b4417	rybB	887980	888006	-	ATTTCGGTTCAAGGTTGATGGGTTTT	antisense_protein_coding	antisense-b3406	antisense-b3406	3536890	3536927	-	AGACTTGCGGCCCAGGTCACCTTTTTTGTGACCTCCG	0	0	1	1	CGGTTCAAGGTTGATGGGTTT&CGGCCCAGGTCACCTTTTTTGTGACCT	.(((((((((.(((((((((.&.))))))..))))))....)).)))).	-15.6	No	Yes	No
110929_1	protein_coding	b3310	rplN	3447970	3448020	-	AAAGAAGCAATTCCGCGTGGTAAGGTCAAAAAAGGTGATGTGCTGAAGGC	ncRNA	b4452	gadY	3664889	3664928	+	AACAGGGAGTGTTATAACGGTTTATTAGTCTGGAGACGG	2.35074e-50	4.08783e-50	1	1	GGTCAAAAAAGGTGATGTGCTGA&ACGGTTTATTAGTCTGGAGACG	.(((.....((((((((.((((.&.)))).))))).)))...))).	-10	No	No	Yes
1109331_1	ncRNA	b4704	arrS	3657983	3658041	-	AATATCGAGTCTCCTTGTTTCGACTTAAGCTGGCAATTGGATTGCCAGCTTTCTTTTA	rRNA	b3970	rrlB	4169903	4169939	+	AAGTAACGATAAAGCGGGTGAAAAGCCCGCTCGCCG	0	0	1	1	AAGCTGGCAATTGGATTGCCAGCTTTC&TAAAGCGGGTGAAAAGCCCGCTC	.(((.(((.......(((((.(((((.&.))))).)))))...))).))).	-15.8	Yes	No	No
1109586_1	protein_coding	b3165	rpsO	3311664	3311727	-	AGAGATCGGCGTCCTTTCATTCTATATACTTTGGAGTTTTAAAATGTCTCTAAGTACTGAAGC	inter	int-4424-1	int-4424-1	4362001	4362034	+	GATGGGTTTATTTACATATTATTGGTGAATGCA	0.00404357	0.00507644	1	1	GGCGTCCTTTCATTCTATATACTTTGGAGTTTTAAAATGTCT&GATGGGTTTATTTACATATTATTGGTGAATGCA	.((((....(((((..(((.......((((.......((((.&)))).....))))......))).))))))))).	-5.6	No	No	Yes
11099_62	3UTR	b0802	ybiJ	837454	837502	-	ATGCTCTAACCCTCATTGATCCTATGTTACCCTTGTTTGCCCGTCCGC	ncRNA	b4624	ryjB	4528042	4528111	+	GAAGGCGGCAGGGATCGCAGAAGGGTTATTGCTCTTTGCCGGGGATAAGCGCTCTGCTTATCCCCATCT	3.58e-272	9.98065e-272	4	1	ATGCTCTAACCCTCATTGATCCTATGTTACCCTTGTTTGCCC&AGGCGGCAGGGATCGCAGAAGGGTTATTGCTCTTTGCCGGGGATAAGCGC	.((((.((.((((((.(((((((.(((...(((((.(((((.&.))))))))))...)))..))))))).)).........)))).)))))).	-30.7	No	No	Yes
1110000_1	protein_coding	b0194	proS	217039	217071	-	CAGATTAAAGGCTGATGCCAGAAAGGGTCCTG	ncRNA	b4585	chiX	507220	507286	+	GACGGCATAATAATAAAAAAATGAAATTCCTCTTTGACGGGCCAATAGCGATATTGGCCATTTTTT	0	0	1	1	AGGCTGATGCCAGAAAGGGTCCT&CGGGCCAATAGCGATATTGGCCA	.((((((((........(((((.&.)))))........)))))))).	-18.4	No	No	Yes
1110323_1	protein_coding	b2688	gshA	2814893	2814955	-	TGAACGCCGTCAGCAGGAAATGGAAGCCGCTGATACCGAACCGTTTGCGGTGTGGCTGGAAA	ncRNA	b4704	arrS	3657983	3658052	-	AATCCGATTTAAATATCGAGTCTCCTTGTTTCGACTTAAGCTGGCAATTGGATTGCCAGCTTTCTTTTA	0	0	1	1	CGTCAGCAGGAAATGGAAGCCGCTGATACCGAACCGTTTGCGGTGTGGCTGGAA&ATCGAGTCTCCTTGTTTCGACTTAAGCTGGCAATTGGATTGCCAGCTTTCT	.(..(((.((.(((....((((((.....((((......((((.(.((((.((.&.)).)))).).)))))))).....))).)))......))).)).)))..).	-23.9	No	No	Yes
1110387_1	protein_coding	b0890	ftsK	936422	936466	+	TGTCTGCGCTGGGTGTGCGTAATCTGGCGGGTTATAACGAAAAA	inter	int-4260-1	int-4260-1	3941624	3941648	+	ATGCACACCCCGCGCCGCTGAGAA	9.30907e-15	1.42319e-14	2	1	TGCGCTGGGTGTGCGTA&ATGCACACCCCGCGCC	.((((.((((((((((.&)))))))))).)))).	-27	Yes	No	No
1110938_1	rRNA	b0204	rrlH	226514	226549	+	GCGGATGACTTGTGGCTGGGGGTGAAAGGCCAATC	ncRNA	b4704	arrS	3657990	3658052	-	AATCCGATTTAAATATCGAGTCTCCTTGTTTCGACTTAAGCTGGCAATTGGATTGCCAGCTT	0	0	1	1	TGGCTGGGGGTGAAAGGCCAA&CTGGCAATTGGATTGCCAGCTT	.((((((.(((.....((((.&.))))......))).)))))).	-19.4	No	Yes	No
1111704_1	ncRNA	b4704	arrS	3657987	3658052	-	AATCCGATTTAAATATCGAGTCTCCTTGTTTCGACTTAAGCTGGCAATTGGATTGCCAGCTTTCT	ncRNA	b4458	oxyS	4158313	4158354	-	CCGTTTCGAGAGTTTCTCAACTCGAATAACTAAAGCCAACG	0	0	1	1	ATCGAGTCTCCTTGTTTCGACTTAAGCTGGC&CCGTTTCGAGAGTTTCTCAACTCGAA	.((((((.......((((((....(((.((.&)))))))))))........)))))).	-13.7	No	Yes	No
1111742_1	ncRNA	b4585	chiX	507227	507288	+	TAATAATAAAAAAATGAAATTCCTCTTTGACGGGCCAATAGCGATATTGGCCATTTTTTTA	tRNA	b2695	serV	2818602	2818645	-	GGTGAGGTGGCCGAGAGGCTGAAGGCGCTCCCCTGCTAAGGGA	0	0	1	1	CCTCTTTGACGGGCCAATAGCGATATTGGCCATTTTT&TGAGGTGGCCGAGAGGCTGAAGGCGCTCCCCTGCTAAGGGA	.(((((.(..(((((..((((....(((((((((((.&.)))))))))))...))))..))).....))..).))))).	-29.3	No	Yes	No
1111863_1	protein_coding	b2096	gatY	2176395	2176428	-	TTTGCAGTCGGCTAAATCCGCAATGCGCGATGT	rRNA	b3854	rrlA	4039273	4039294	+	ATACCAGCTGGCTGCAACTGT	5.06118e-44	9.26442e-44	1	1	TTTGCAGTCGGCTA&CAGCTGGCTGCAAC	.((((((((((((.&.)))))))))))).	-20	Yes	No	No
1112601_1	antisense_protein_coding	antisense-b0823	antisense-b0823	861815	861841	+	GCCTGCCAGAAAGTCTGCGGCGGCTG	protein_coding	b0862	artQ	902037	902089	-	GCGTGGCCTGCCAGAAATTCTGGTGGTGCTGTTTATCTATTTTGGCTCCTCG	0	0	1	1	GCCTGCCAGAAAGTCTGCGGCGGCT&CGTGGCCTGCCAGAAATTCTGGTGGTGCT	(((((((((((..((((((((.((.&.)).))).)).)))..))))))))).)).	-29.7	No	Yes	No
1112776_1	ncRNA	b4585	chiX	507216	507273	+	AAGTGACGGCATAATAATAAAAAAATGAAATTCCTCTTTGACGGGCCAATAGCGATA	protein_coding	b1492	gadC	1570050	1570078	-	CTTTGGGCGCTGGCATTAACGCAGTTTG	0	0	1	1	GGCCAATAGCGA&GCGCTGGCA	.(((...((((.&.))))))).	-9.5	No	No	Yes
1112786_1	ncRNA	b1954	dsrA	2025239	2025282	-	TTTAAGTGCTTCTTGCTTAAGCAAGTTTCATCCCGACCCCCTC	ncRNA	b4445	omrB	2976346	2976385	-	CCCAGAGGTATTGATAGGTGAAGTCAACTTCGGGTTGAG	0	0	3	1	GCTTAAGCAAGTTTCATCCCGACCCCCTC&AGAGGTATTGATAGGTGAAGTCAACTTCGGGTTGAG	.(((((.(((((((((((.(((...((((&.))))..)))...))))))....))))..).)))))	-13.5	No	Yes	Yes
1115068_1,115478_2	tRNA	b0665	glnV	696542	696571	-	TCCGAGGTTCGAATCCTCGTACCCCAGCC	rRNA	b4009	rrlE	4210792	4210821	+	AAATTAGCGGATGACTTGTGGCTGGGGGT	3.619e-296	1.03587e-295	5	2	ACCCCAGCC&TGGCTGGGGG	.((((((((&.)))))))).	-18.3	No	Yes	Yes
1115253_1	protein_coding	b0897	ycaC	945490	945534	-	TGATAAAAATGATGCTGCCGTTTTGCTTGTTGATCACCAGGCTG	protein_coding	b3210	arcB	3350667	3350728	-	AGTGCTGAAAGCGTGGGTGGCAAAAGCCACTAAAAAATGACCCCGGCTAGACCGGGGTGCG	0	0	1	1	TGCTGCCGTTTTGCTTGTTGATCACCAGGCTG&AAGCGTGGGTGGCAAAAGCCACTAAAAAATGACCCCGGCT	.((((.((((((((((.(((.((((((.(((.&.))).))).))))))))))......))))))....)))).	-20.9	No	No	Yes
1115826_1	rRNA	b0205	rrfH	228756	228786	+	GCCTGGCGGCCGTAGCGCGGTGGTCCCACC	antisense_protein_coding	antisense-b4044	antisense-b4044	4259104	4259136	-	CAGAATTTTTAACCGTCACGTTGCGGCAAACC	0.0134667	0.0164204	1	1	GGCCGTAGCGCGGTGGTC&AACCGTCACGTTGCGGCA	.(((((((((.((((((.&.)))))).))))))))).	-23.1	No	No	Yes
1115827_1	rRNA	b2588	rrfG	2726158	2726188	-	TGCCTGGCGGCCGTAGCGCGGTGGTCCCAC	antisense_protein_coding	antisense-b4044	antisense-b4044	4259103	4259136	-	CAGAATTTTTAACCGTCACGTTGCGGCAAACCA	0.027493	0.0328089	2	1	CTGGCGGCCGTAGCGCGGTGGTC&AACCGTCACGTTGCGGCAAACCA	.(((..(((((((((.((((((.&.)))))).)))))))))...)))	-24.6	No	No	Yes
1115828_1	rRNA	b3274	rrfD	3423757	3423787	-	TGCCTGGCGGCCGTAGCGCGGTGGTCCCAC	antisense_protein_coding	antisense-b4044	antisense-b4044	4259104	4259136	-	CAGAATTTTTAACCGTCACGTTGCGGCAAACC	0.00755863	0.00935017	1	1	GGCCGTAGCGCGGTGGTC&AACCGTCACGTTGCGGCA	.(((((((((.((((((.&.)))))).))))))))).	-23.1	No	No	Yes
1115959_1	ncRNA	b4704	arrS	3657983	3658049	-	CCGATTTAAATATCGAGTCTCCTTGTTTCGACTTAAGCTGGCAATTGGATTGCCAGCTTTCTTTTA	antisense_protein_coding	antisense-b3567	antisense-b3567	3733404	3733432	-	TGATTGCCGCCGCTCAAACGTCCAATAG	1.14611e-21	1.84901e-21	1	1	CGACTTAAGCTGGCAATTG&TGATTGCCGCCGCTCAAACGTCC	.(((...(((((((((((.&.))))))))..))).....))).	-13.4	Yes	No	No
1116021_1	ncRNA	b4444	omrA	2976102	2976161	-	CGGTACGCTCTTCGTACCCTGTCTCTTGCACCAACCTGCGCGGATGCGCAGGTTTTTTT	protein_coding	b3033	yqiB	3176894	3176915	-	AGCGGACTGGTTGCGATACTG	0	0	1	1	CGGTACGCTCTTCGTACCCTGTCTCTTGCA&AGCGGACTGGTTGCGATACTG	(((((......(((((.((.((((...((.&.)))))).)).))))))))))	-15.4	No	No	Yes
1116398_1	rRNA	b2589	rrlG	2726733	2726807	-	AGCAGGTCATAGTGATCCGGTGGTTCTGAATGGAAGGGCCATCGCTCAACGGATAAAAGGTACTCCGGGGATAA	ncRNA	b3864	spf	4049898	4049946	+	GTAGGGTACAGAGGTAAGATGTTCTATCTTTCAGACCTTTTACTTCAC	0	0	1	1	AGTGATCCGGTGGTTCTGAATGGAAGGGCCATCGCTCAACGGATAAAAGGTACTCC&AGGGTACAGAGGTAAGATGTTCTATCTTTCAGACCTTTTACTTCAC	.((((......((.((((((.(((.(((.(((((((.............((((((.&.))))))...)))..)))).))).))))))))))).......))))	-24.6	No	Yes	No
1116621_1	ncRNA	b4452	gadY	3664913	3664954	+	TTAGTCTGGAGACGGCAGACTATCCTCTTCCCGGTCCCCTA	rRNA	b3970	rrlB	4171299	4171320	+	AGAGGACCGGAGTGGACGCAT	0	0	1	1	ATCCTCTTCCCGGTCCCCTA&AGAGGACCGGAGTGGAC	.(((.((..(((((((.((.&)).))))))))).))).	-19.5	No	No	Yes
1116820_1	tRNA	b2815	metW	2947497	2947568	+	GCGGGGTGGAGCAGCCTGGTAGCTCGTCGGGCTCATAACCCGAAGGTCGTCGGTTCAAATCCGGCCCCCGC	rRNA	b3854	rrlA	4039500	4039527	+	TGGCCAGGCTGTCTCCACCCGAGACTC	0	0	1	1	GGGGTGGAGCAGCCTGGTA&GGCCAGGCTGTCTCCACCCG	.(((((((((((((((((.&.))))))))).)))))))).	-37.3	No	No	Yes
1116821_1	tRNA	b2816	metV	2947607	2947678	+	GCGGGGTGGAGCAGCCTGGTAGCTCGTCGGGCTCATAACCCGAAGGTCGTCGGTTCAAATCCGGCCCCCGC	rRNA	b3854	rrlA	4039500	4039527	+	TGGCCAGGCTGTCTCCACCCGAGACTC	0	0	1	1	GGGGTGGAGCAGCCTGGTA&GGCCAGGCTGTCTCCACCCG	.(((((((((((((((((.&.))))))))).)))))))).	-37.3	No	No	Yes
1116920_1	rRNA	b3275	rrlD	3424333	3424397	-	TAGTGATCCGGTGGTTCTGAATGGAAGGGCCATCGCTCAACGGATAAAAGGTACTCCGGGGATA	ncRNA	b3864	spf	4049898	4049946	+	GTAGGGTACAGAGGTAAGATGTTCTATCTTTCAGACCTTTTACTTCAC	0	0	1	1	AGTGATCCGGTGGTTCTGAATGGAAGGGCCATCGCTCAACGGATAAAAGGTACTCC&AGGGTACAGAGGTAAGATGTTCTATCTTTCAGACCTTTTACTTCAC	.((((......((.((((((.(((.(((.(((((((.............((((((.&.))))))...)))..)))).))).))))))))))).......))))	-24.6	No	Yes	No
1117074_1	5UTR	b0650	hscC	683409	683429	-	TCTGTTTATCTCTTTTTCTT	ncRNA	b3864	spf	4049898	4049949	+	GTAGGGTACAGAGGTAAGATGTTCTATCTTTCAGACCTTTTACTTCACGTA	2.25742e-32	3.89022e-32	1	1	TCTGTTTATCTCTTTTTCTT&TAGGGTACAGAGGTAAGATGTTCTATCTTTCAGAC	(((((((((((((...((((&.))))...))))))))).............)))).	-10.2	No	Yes	No
1117263_1	antisense_protein_coding	antisense-b2498	antisense-b2498	2620228	2620251	+	TTAATTATTTTTATTCTTTATTT	ncRNA	b3864	spf	4049898	4049946	+	GTAGGGTACAGAGGTAAGATGTTCTATCTTTCAGACCTTTTACTTCAC	1.50166e-38	2.6624e-38	1	1	ATTATTTTTATTCTTTATT&GTAGGGTACAGAGGTAAG	.((((((((...((((((.&))))))...)))))))).	-6.2	No	Yes	No
1117331_1	protein_coding	b3818	yigG	4003083	4003103	-	TTTCTTATTATCTTTTTTAA	ncRNA	b3864	spf	4049898	4049946	+	GTAGGGTACAGAGGTAAGATGTTCTATCTTTCAGACCTTTTACTTCAC	2.84602e-35	4.96268e-35	1	1	TTCTTATTATCTT&CAGAGGTAAGAT	.((((((..(((.&.))).)))))).	-6.3	No	Yes	No
1117390_1	antisense_protein_coding	antisense-b1901	antisense-b1901	1985157	1985176	+	TTTTTCTCCAGTTCTTCTT	ncRNA	b3864	spf	4049898	4049946	+	GTAGGGTACAGAGGTAAGATGTTCTATCTTTCAGACCTTTTACTTCAC	0	0	1	1	TTTTTCTCCAGTTCTTC&TAGGGTACAGAGGTAAGAT	((((((((....((((.&.))))....)))).)))).	-4.1	No	Yes	No
111751_16	protein_coding	b3730	glmU	3914300	3914327	-	ATTGGCACCGGTTGCGTGATTAAAAAC	protein_coding	b4073	nrfD	4291005	4291035	+	TAACCCGATCCTGCCGGTGCTGTTCCTCTT	5.40122e-07	7.51922e-07	4	1	TGGCACCGGTTGCGTGATTA&CGATCCTGCCGGTGCTG	.(((((((((...(.((((.&.))))).))))))))).	-19.1	Yes	No	No
1117644_1	5UTR	b0654	gltJ	686704	686741	-	CGCAATACGCTGGGTAACAATCTTCGAGGGTAGCAGT	protein_coding	b3946	fsaB	4139469	4139487	-	CCTGCGCGACGCTATTCC	0	0	1	1	AGGGTAGCA&CGCTATTCC	.(((((((.&.))))))).	-8.6	No	Yes	No
1118222_1	tRNA	b2814	metZ	2947386	2947410	+	CGCGGGGTGGAGCAGCCTGGTAGC	ncRNA	b4704	arrS	3657983	3658054	-	GTAATCCGATTTAAATATCGAGTCTCCTTGTTTCGACTTAAGCTGGCAATTGGATTGCCAGCTTTCTTTTA	0	0	1	1	CGGGGTGGAGCAGCCTGGTAGC&AGCTGGCAATTGGATTGCCAGCTTTC	.(((((.(.((((((((.((((&.)))).))...)).))))).))))).	-14.5	No	Yes	No
1118704_1	protein_coding	b2287	nuoB	2404349	2404399	-	TTACCGCGGTGCATGACGTGGCGCGTTTTGGCGCAGAAGTATTGCGTGCT	protein_coding	b3459	panM	3598120	3598183	+	GCGCCTGCTCGCTGCCGTGCGGGTAACCTTAAGCGGCACCGAGGGAGCACTGGATTCCCTGCG	8.32856e-05	0.000110493	1	1	ACCGCGGTGCATGACGTGGCGCGTTTTGGCGCAGAAGTATTGCGTG&GCGCCTGCTCGCTGCCGTGCGGGTAACCTTAAGCGGCACCGAGGG	.((.((((((.(((.((.((.(((..((((((.(.((((..((((.&)))).))))))).)))).))).)).)).)))....)))))).)).	-36.2	Yes	No	No
1118792_1	protein_coding	b2044	wcaL	2116478	2116497	-	TTTAGCCCGCGTCCCGTGA	5UTR	b2514	hisS	2640598	2640665	-	CGCTTCCCGTGTATGATTGAACCCGCATGGCTCCCGAAACATTGAGGGAAGCGTTGAGGGTTCATTT	0	0	1	1	TAGCCCGCGTCCCG&AGGGAAGCGTTGAGGGTTC	.(((((((.((((.&.)))).)).....))))).	-14.2	No	Yes	No
1119136_1	ncRNA	b4408	csrB	2924232	2924297	-	CAGGAAGCAATAGTTCAGGATGAACGATTGGCCGCAAGGCCAGAGGAAAAGTTGTCAAGGATGAG	protein_coding	b4246	pyrL	4472420	4472462	-	GTTGATCACCCATTCCCAGCCCCTCAATCGAGGGGCTTTTTT	1.37249e-54	2.60575e-54	1	1	CAGGAAGCAATAGTTCAGGATGAACGATTGGCCGCAAGGCCAGAGGAAAAGTTGTCAAG&GTTGATCACCCATTCCCAGCCCCTCAATCGAGGGGCTTTTTT	.(((((((................(((((((......(((..(.((((..((.(((((.&.))))).))...))))).)))..)))))))....))))))).	-18.9	No	No	Yes
1119204_1	ncRNA	b4585	chiX	507216	507286	+	AAGTGACGGCATAATAATAAAAAAATGAAATTCCTCTTTGACGGGCCAATAGCGATATTGGCCATTTTTT	protein_coding	b0814	ompX	850417	850455	+	TAGGACTTATTTGAATCACATTTGAGGTGGTTATGAAA	0	0	2	1	AGTGACGGCATAATAATAAAAAAATGAAATTCCTC&TAGGACTTATTTGAATCACATTTGAGGTGGTTATG	.(((((.((.(((........((((((...((((.&.)))).)))))).........)))..)).))))).	-11.5	Yes	No	Yes
112001_1	3UTR	b1852	zwf	1934780	1934803	-	AACATGATCTTGCGCAGATTGTA	protein_coding	b3618	yibB	3792834	3792853	-	GCTGAGAATTTTCCTTTCA	0.000262247	0.000320901	1	1	ATCTTGCGCA&GCTGAGAA	.(((((.((.&))))))).	-5.1	No	No	Yes
1120106_1	protein_coding	b3702	dnaA	3883718	3883757	-	ATCGACTTTTGTTCGAGTGGAGTCCGCCGTGTCACTTTC	rRNA	b3854	rrlA	4037534	4037559	+	GTACACGGTGGATGCCCTGGCAGTC	0	0	2	1	CGACTTTTGTTCGAGTGGAGTCCGCCGTGTCACT&GTACACGGTGGATGCCCTGGCAGTC	.((((......(.((.((.(((((((((((.((.&))))))))))))).)))).).))))	-26.5	Yes	No	No
1120392_1	rRNA	b2591	rrsG	2730949	2730969	-	AAGACCAAAGAGGGGGACCT	rRNA	b3278	rrsD	3428608	3428650	-	GTGAGTAATGTCTGGGAAACTGCCTGATGGAGGGGGATAACT	1.7206e-49	3.21781e-49	1	1	ACCAAAGAGGGGGACCT&TGGGAAACTGCCTGATGGA	.(((...(((.((.(((&.)))...)).)))..))).	-10.8	No	Yes	No
1121106_1	ncRNA	b3864	spf	4049949	4049986	+	ATCGGATTTGGCTGAATATTTTAGCCGCCCCAGTCAG	rRNA	b4009	rrlE	4211642	4211707	+	GTACCCCAAACCGACACAGGTGGTCAGGTAGAGAATACCAAGGCGCTTGAGAGAACTCGGGTGAA	0	0	1	1	ATCGGATTTGGCTGAATATTTTAGCCGCCCCAGTCA&CGACACAGGTGGTCAGGTAGAGAATACCAAGGCGCTTGAG	.((((...((.((...((((((.((((((((.(((.&.)))...)).)))..)))..))))))...)).)).)))).	-17.7	No	Yes	No
1121256_1	inter	int-3011	int-3011	1647052	1647095	-	GTGGTTTGTTACTTGTTTTACCGGGGATATGCCAGAAACGCGC	ncRNA	b4704	arrS	3657984	3658041	-	AATATCGAGTCTCCTTGTTTCGACTTAAGCTGGCAATTGGATTGCCAGCTTTCTTTT	0	0	1	1	GTGGTTTGTTACTTGTTTTACCGGGGATATGCCAGAA&ATCGAGTCTCCTTGTTTCGACTTAAGCTGGCAATTGGATTGCCAG	.((((((((((((((((....((((((...((..((.&.))..)).))))))....)))..))).)))))).......)))).	-15.1	No	Yes	No
1121353_1	ncRNA	b2911	ssrS	3056078	3056143	+	GTCCGAGAAGCCTTAAAACTGCGACGACACATTCACCTTGAACCAAGGGTTCAAGGGTTACAGCC	ncRNA	b4704	arrS	3657983	3658054	-	GTAATCCGATTTAAATATCGAGTCTCCTTGTTTCGACTTAAGCTGGCAATTGGATTGCCAGCTTTCTTTTA	0	0	1	1	GTCCGAGAAGCCTTAAAACTGCGACGACACATTCACCTTGAACCAAGGGTTCAAGGGTTACA&GTAATCCGATTTAAATATCGAGTCTCCTTGTTTCGACTTAAGCTGGCAATTGGATT	((((((...(((.........(((.((((.......(((((.....(((((...(((((((.&)))))))))))).....)))))......))))))).........)))..)))))).	-26.8	No	Yes	No
112142_21	protein_coding	b3160	yhbW	3304447	3304478	+	TGGGATAGTGTGTCTTAACGCGGGAAGCCTT	3UTR	b4484	cpxP	4106330	4106371	+	TTTCCTTGCCATAGACACCATCCCTGTCTTCCCCCACATGC	6.56115e-55	1.24662e-54	5	1	TGGGATAGTGTGTCTTAACGCGGGAAGC&TTTCCTTGCCATAGACACCATCCCT	.(((((.(.((((((....((((((((.&)))))).))...)))))))))))).	-23.5	No	No	Yes
11216_354	ncRNA	b4450	arcZ	3350642	3350680	+	TTCCCTGGTGTTGGCGCAGTATTCGCGCACCCCGGTCT	protein_coding	b3707	tnaC	3888503	3888536	+	CCTTGATTTGCCCTTCTGTAGCCATCACCAGAG	0	0	23	1	CCTGGTGTTGGCGCAGTATTCGCGCACCCCGGTCT&TGATTTGCCCTTCTGTAGCCATCACCAGA	.((((((.((((((((.....(.(((....((((.&.))))))))...)))).)))).)))))).	-24.5	Yes	Yes	Yes
112217_3,1616123_1	3UTR	b4484	cpxP	4106331	4106370	+	TTCCTTGCCATAGACACCATCCCTGTCTTCCCCCACATG	rRNA	b4009	rrlE	4210794	4210827	+	ATTAGCGGATGACTTGTGGCTGGGGGTGAAAGG	0	0	2	2	TTCCTTGCCATAGACACCATCCCTGT&TTAGCGGATGACTTGTGGCTGGGGGT	(((((.(((((((....((((((((.&.))).)))))..))))))).))))).	-21.8	No	Yes	Yes
112236_21	ncRNA	b4577	sgrS	77366	77383	+	GATGAAGCAAGGGGGTG	5UTR	b1101	ptsG	1157801	1157865	+	AGGCTCTCCCCCCTTGCCACGCGTGAGAACGTAAAAAAAGCACCCATACTCAGGAGCACTCTCA	1.42963e-21	2.30442e-21	4	1	GATGAAGCAAGGGGGT&CCCCCCTTGCCACGCGTG	.(((..(((((((((.&.)))))))))....))).	-19.7	No	Yes	No
112259_19	antisense_protein_coding	antisense-b2882	antisense-b2882	3025064	3025106	-	AAAGCCGTATTTGAACGGATGCGGGATGGTGATTAACGGCAA	3UTR	b4484	cpxP	4106329	4106369	+	TTTTCCTTGCCATAGACACCATCCCTGTCTTCCCCCACAT	3.30501e-06	4.52134e-06	5	1	CGGATGCGGGATGGTGATTAACGGCAA&TTGCCATAGACACCATCCCTGTCTTCCC	.(((.(((((((((((.(((..((((.&.)))).))).))))))))).))..))).	-26.9	No	No	Yes
1122639_1	ncRNA	b4408	csrB	2924384	2924450	-	CAGGGAAAGGCTTCTGGATGAAGCGAAGAGGATGACGCAGGACGCGTTAAAGGACACCTCCAGGAT	ncRNA	b3864	spf	4049948	4049988	+	AATCGGATTTGGCTGAATATTTTAGCCGCCCCAGTCAGTA	0	0	1	1	AGGGAAAGGCTTCTGGATGAAGCGAAGAGGATG&AATCGGATTTGGCTGAATATTTTAGCCGCCCCA	.(((...((((.....((..(((.(((..(((.&.)))...))).)))..)).....))))..))).	-19.1	No	No	Yes
1122866_1	3UTR	b0729	sucD	765068	765086	+	GCCCTCGCCGCTTCCCTC	protein_coding	b3022	mqsR	3168538	3168560	-	CAGGGAGGCGGGGGTTATGGAA	6.09918e-244	1.64774e-243	1	1	GCCCTCGCCGCTTCCCTC&CAGGGAGGCGGGGGTT	(((((((((...(((((.&.)))))))))))))).	-24.8	No	No	Yes
1122907_1	rRNA	b3275	rrlD	3423957	3424019	-	AACTTGCCCCGAGATGAGTTCTCCCTGACCCTTTAAGGGTCCTGAAGGAACGTTGAAGACGA	rRNA	b4009	rrlE	4212873	4212943	+	TTGATAGGCCGGGTGTGTAAGCGCAGCGATGCGTTGAGCTAACCGGTACTAATGAACCGTGAGGCTTAAC	1.2845e-116	2.91331e-116	1	1	TGCCCCGAGATGAGTTCTCCCTGACCCTTTAAGGGTCCTGAAGGAACGTTGAAGACG&GGTGTGTAAGCGCAGCGATGCGTTGAGCTAACCGGTACTAATGAACCGTGAGGCT	.(((.....(((.((((......((((((...(.((((((......((((..(.((.&.)).)...))))))).))).)...)))......)))......)))))))..))).	-22.1	Yes	No	No
1122990_1	protein_coding	b1825	yebO	1908463	1908533	-	AATTCAGGCGTGATGAACATTGCGTCTTTGGTTGTATCGGTGGTGGTTCTTCTTATCGGGCTCATCTTGT	ncRNA	b4452	gadY	3664892	3664937	+	AGGGAGTGTTATAACGGTTTATTAGTCTGGAGACGGCAGACTATC	0	0	1	1	TGATGAACATTGCGTCTTTGGTTGTATCGGTGGTGGTTCTTCTTA&AGGGAGTGTTATAACGGTTTATTAGTCTGGAGACGGCAGACTATC	.((((....((((((((((((..(((.(.((.((((..((((((.&))))))..)))).)).)..)))....))))))))).)))..))))	-19.6	No	No	Yes
112370_18	protein_coding	b1851	edd	1932943	1932971	-	GTGTGAATGGACAGACAGGCGAACTGAC	ncRNA	b4443	gcvB	2942842	2942882	+	TTTACCCTGTCTGTCCATAGTGATTAATGTAGCACCGCCT	0	0	2	1	GTGTGAATGGACAGACAGGC&CCCTGTCTGTCCATAGTGATTAATGTAGCACC	((((..(((((((((((((.&.))))))))))))).............)))).	-25.3	No	Yes	No
112408_1	5UTR	b3170	rimP	3318108	3318152	-	TGAAAAAATCCTTCTGGAAAGTGCTCCAGACCGCAGTTGCGGTT	protein_coding	b4037	malM	4250443	4250463	+	CTTTATCAGCAGTGTAAAAG	0	0	1	1	CGCAGTTGCGGTT&TATCAGCAGTGTA	.(((.(((((((.&.))).))))))).	-6	Yes	No	No
1124288_1	ncRNA	b4443	gcvB	2942767	2942803	+	TTGTGTTGTTGTGTTTGCAATTGGTCTGCGATTCAG	rRNA	b4009	rrlE	4211017	4211052	+	GGGAAACAACCCAGACCGCCAGCTAAGGTCCCAAA	0	0	1	1	TTGTGTTGTTGTGTTTGCAATTGGTCTGCGA&CCCAGACCGCCAGCTAAGGTCCCAAA	(((.(.(.(((.(((.((....((((((.(.&.))))))))).)))))).).).))).	-12.8	Yes	No	No
1124562_1	protein_coding	b0485	glsA	512245	512274	+	TATTGAACTGGCAACGCTTGGCGCGACGC	protein_coding	b0486	ybaT	513613	513636	+	TCACTCGCCAGCGTTGCCAGCGC	1.83267e-05	2.47111e-05	1	1	ACTGGCAACGCTTGGCGCGA&ACTCGCCAGCGTTGCCAGC	.((((((((((.(((((.(.&.).))))))))))))))).	-29.5	No	Yes	No
1124708_1	protein_coding	b0155	clcA	175214	175259	+	TTTATGGCGGCAGTCGTCGGCACGCTTGTTGGGCTGGCAGCGGTT	protein_coding	b1712	ihfA	1795551	1795609	-	CCAAATGTGTAGAGGCATTAAAAGAGCGATTCCAGGCATCATTGAGGGATTGAACCTA	6.01632e-25	9.90837e-25	1	1	TATGGCGGCAGTCGTCGGCACGCTTGTTGGGCTGGC&CCAAATGTGTAGAGGCATTAAAAGAGCGATTCCAGGCATC	.(((.(((.(((((((.....((((.(((.(((((.&)))...)).))))))).......)).))))))).).))).	-17.1	No	Yes	No
112481_21	protein_coding	b1924	fliD	2004067	2004100	+	AAGCCGATCTTTTTTCCGCCACCAGCACCACCA	protein_coding	b1929	yedE	2009170	2009199	+	GGTTTTGGCATCGTGCTGGCTGGCGGCTG	2.43908e-08	3.47547e-08	5	1	TCCGCCACCAGCACCACCA&TTGGCATCGTGCTGGCTGGCGGC	.(((((((((((((..(((&.)))....))))))).)))))).	-26.4	No	Yes	No
1124897_1	antisense_protein_coding	antisense-b1722	antisense-b1722	1805324	1805387	+	TTACATGCTGTAGCCCAGCGATAAGGTTGTCCGACGGTCGGTATGTTCCGGTGCAGACTCTGG	3UTR	b2904	gcvH	3049092	3049154	-	TTATTCCTCTTCTGCGGGAGAGGATCAGGGTGAGGAAAATTTATGCCTCACCCTCACTCTCT	2.69151e-13	4.05293e-13	1	1	AGCGATAAGGTTGTCCGACGGTCGGTATGTTCCGGTGCAGACTCTGG&TCCTCTTCTGCGGGAGAGGATCAGGGTGAGGAAAATTTATGCC	.((.(((((....(((..((.(((((...((((..((((((....((&.))...))))))))))...))).)).)).)))...))))))).	-23	Yes	No	No
1124939_1	protein_coding	b1084	rne	1141167	1141210	-	CTCCTGCGCGTCCGCAACCTGTTGAGTAATAATTAGCTCAAAG	rRNA	b2589	rrlG	2726945	2726972	-	TCCGGGTTGCGGACAGTGTCTGGTGGG	1.53185e-12	2.29335e-12	1	1	CTCCTGCGCGTCCGCAACCTGT&CCGGGTTGCGGACAGTGTCTGGTGG	(.((.((((((((((((((((.&.)))))))))))).))))..)).).	-30.1	No	Yes	No
1125024_1	3UTR	b2844	yqeF	2984158	2984175	-	GTTTCACTATCGTTTTC	protein_coding	b3383	yhfZ	3512330	3512361	-	TTTACTGAAAATTTATTATGCGTCGAACGTT	0.0182015	0.0219724	1	1	GTTTCACT&CGTCGAACG	((((.((.&.)).)))).	-3.7	Yes	No	No
1125032_1	antisense_protein_coding	antisense-b0007	antisense-b0007	6811	6848	+	GCTAAACGCGGATCGTTACCCAGCGCTGCC	antisense_protein_coding	antisense-b1978	antisense-b1978	2051378	2051399	-	ACGCTGGGTAACAATCTTCGAGGGTAGCAGT	0.00788375	0.00973791	1	1	GCTAAACGCGGATCGTTACCCAGCGC&ACGCTGGGTAACAATCTTCGAGGGTAGCA	((((..((.((((.(((((((((((.&.))))))))))).)))).))....)))).	-31.2	No	No	Yes
112503_19	antisense_protein_coding	antisense-b0148	antisense-b0148	163336	163366	-	GCTAAACGCGGATCGTTACCCAGCGCTGCC	5UTR	b0654	gltJ	686704	686735	-	ACGCTGGGTAACAATCTTCGAGGGTAGCAGT	0	0	4	1	GCTAAACGCGGATCGTTACCCAGCGC&ACGCTGGGTAACAATCTTCGAGGGTAGCA	((((..((.((((.(((((((((((.&.))))))))))).)))).))....)))).	-31.2	No	No	Yes
1125104_1	ncRNA	b4442	micA	2814803	2814859	+	AAGACGCGCATTTGTTATCATCATCCCTGAATTCAGAGATGAAATTTTGGCCACTC	protein_coding	b4057	yjbR	4270762	4270825	+	TTTGCGATGGTGAAAGAAGTAGAAAATCGCCCAGCTGTTTCGCTGAAAACCAGCCCGGAGCTG	6.43339e-16	9.93674e-16	1	1	ATCCCTGAATTCAGAGATGAAATTTTGGCC&CGCCCAGCTGTTTCGCTGAAAACCAGCCCGGAG	.((((((..(((((...((((((...(((.&.))).....)))))))))))...)))...))).	-14.6	No	Yes	No
1126318_1	protein_coding	b2330	prmB	2447493	2447554	-	AGCAGCTTATTGCCGCACGAGAACATTTCGCGATTTATAAAGATTAAGTAAACACGCAAAC	ncRNA	b4450	arcZ	3350642	3350679	+	TTCCCTGGTGTTGGCGCAGTATTCGCGCACCCCGGTC	0	0	1	1	AGCAGCTTATTGCCGCACGAGA&CCTGGTGTTGGCGCAGTATTCGCGCA	.((.((.(((((((((((.((.&.)).))))..).))))))...)))).	-16.6	Yes	No	No
1126378_1	antisense_protein_coding	antisense-b1668	antisense-b1668	1748165	1748188	-	ATGACATAACGCCAGGGAACAGT	ncRNA	b4450	arcZ	3350642	3350681	+	TTCCCTGGTGTTGGCGCAGTATTCGCGCACCCCGGTCTA	3.8754e-33	6.6985e-33	5	1	ATGACATAACGCCAGGGAAC&TTCCCTGGTGTTGGCGCAG	.((...(((((((((((((.&)))))))))))))...)).	-22.8	Yes	Yes	No
1126468_1	protein_coding	b0179	lpxD	201914	201946	+	AACCGCTGCACTGGTGATGAACATTGATGACA	rRNA	b2591	rrsG	2730461	2730478	-	CAGGTGTAGCGGTGAAA	3.0211e-13	4.5474e-13	1	1	AACCGCTGCACTG&AGGTGTAGCGGTG	.(((((((((((.&.))))))))))).	-19.8	No	No	Yes
1126470_1	protein_coding	b0179	lpxD	201914	201943	+	AACCGCTGCACTGGTGATGAACATTGATG	rRNA	b3968	rrsB	4167338	4167355	+	AGGTGTAGCGGTGAAAT	2.8979e-10	4.22963e-10	1	1	AACCGCTGCACTG&AGGTGTAGCGGTG	.(((((((((((.&.))))))))))).	-19.8	No	No	Yes
112657_11	protein_coding	b0981	etk	1042059	1042100	-	TTAAACGCGCCAGCACCGCTTACAGTTACGGCTATAACTAT	ncRNA	b4450	arcZ	3350642	3350662	+	TTCCCTGGTGTTGGCGCAGT	6.45854e-85	1.35584e-84	3	1	CGCGCCAGCACCGC&CTGGTGTTGGCGCA	.((((((((((((.&.)))))))))))).	-24.3	No	Yes	No
1126659_1	5UTR	b0606	ahpF	639507	639571	+	AATTTCCTTCGTCTTTCACGCCATAGCGGCGTTGGCGTCGCCCGCTCACCCCGGTCACTTACTT	5UTR	b2925	fbaA	3071309	3071331	-	TAAGTGACTGGGGTGAGCGAAC	0.0160674	0.0194965	3	1	CCGCTCACCCCGGTCACTTAC&TAAGTGACTGGGGTGAGCGA	.(((((((((((((((((((.&))))))))))))))))))).	-38.6	No	Yes	No
1126866_1	rRNA	b2591	rrsG	2730049	2730115	-	GACAGGTGCTGCATGGCTGTCGTCAGCTCGTGTTGTGAAATGTTGGGTTAAGTCCCGCAACGAGCG	ncRNA	b4445	omrB	2976360	2976405	-	CAGGTTGCTAAAGTGGTGATCCCAGAGGTATTGATAGGTGAAGTC	0	0	1	1	TGCTGCATGGCTGTCGTCAGCTCGTGTTGTGAAATGTTGGGTTAAGTCCCGCAACGAGCG&TGCTAAAGTGGTGATCCCAGAGGTATTGATAGGTGAAGTC	.(((.(((..((((((....(((..............((((....(((((((....(((.&.)))...)))).))))))))))....))))))))).))).	-24.6	No	No	Yes
1126937_1	protein_coding	b0953	rmf	1015806	1015868	+	TCAGACGCTGAATCAAAGGTCACAATGGCTGGGAGGCTGGCGAGAAGCCATGGCGGACAGGG	inter	int-653-1	int-653-1	1216683	1216712	+	TTGTCTGTCGCTTTAGACTATACACAGCA	0	0	1	1	GGCTGGGAGGCTGGCGAGAAGCCATGGCGGACAGG&TTGTCTGTCGCTTTAGACTATACACAGCA	.((((...(..((((..(((((...(((((((((.&)))))))))))))).).)))..).)))).	-22.5	No	Yes	No
1126954_1	tRNA	b1977	asnT	2044557	2044624	+	GTTCAGTCGGTAGAACGGCGGACTGTTAATCCGTATGTCACTGGTTCGAGTCCAGTCAGAGGAGCCA	ncRNA	b3864	spf	4049898	4049988	+	GTAGGGTACAGAGGTAAGATGTTCTATCTTTCAGACCTTTTACTTCACGTAATCGGATTTGGCTGAATATTTTAGCCGCCCCAGTCAGTA	0	0	5	1	CGGCGGACTGTTAATCCGTATGTCACTGGTTCGAGTCCAGTCAGAGGAGCC&TGTTCTATCTTTCAGACCTTTTACTTCACGTAATCGGATTTGGCTGAATATTTTAGCCGCCC	.(((((.(((..(((((((((((....(((..(((((..(..((((((((.&.))))).)))..).))).))..)))..)))))..)))))).............)))))))).	-28	No	Yes	No
1127004_1	5UTR	b1658	purR	1737708	1737776	+	CATTGACCCCTTCCTGACGCTCCGTGTCGTTTTTCCGGCGTACCGCAACACTTTTGTTGTGCGTAAGG	protein_coding	b2266	elaB	2381023	2381054	-	CAGGTTTTACGCAAATGGAGAACGAGAATGT	9.13609e-85	1.91687e-84	1	1	CCGTGTCGTTTTTCCGGCGTACCG&AGGTTTTACGCAAATGGAGAACGAGAATGT	.(((.(((((((((..(((((((.&.)))...))))....)))))))))..))).	-18	No	No	Yes
112704_19	protein_coding	b2424	cysU	2542070	2542096	-	ATGGCTGGGGATTGCGGTGGCTATGG	3UTR	b4484	cpxP	4106331	4106369	+	TTCCTTGCCATAGACACCATCCCTGTCTTCCCCCACAT	2.01617e-39	3.595e-39	18	1	TGGCTGGGGATTGCGGTGGCTATGG&GCCATAGACACCATCCCTGTCT	.(((.((((((...((((.((((((&.)))))).))))))))))))).	-24.4	No	Yes	Yes
1127540_1	protein_coding	b3629	waaS	3804624	3804678	-	AGTTTATCTGACAAAAATAACAGCCAGCCAATATGTTTTTTCCTTGGTCGTGAT	ncRNA	b3864	spf	4049947	4049987	+	TAATCGGATTTGGCTGAATATTTTAGCCGCCCCAGTCAGT	0	0	1	1	TCTGACAAAAATAACAGCCAGCCA&CGGATTTGGCTGAATATTTTAGCCGCCCCAGTCAGT	.(((((.((((((.(((((((((.&.))..)))))))..))))))..........))))).	-16.3	No	Yes	No
1127694_1	ncRNA	b4443	gcvB	2942842	2942881	+	TTTACCCTGTCTGTCCATAGTGATTAATGTAGCACCGCC	rRNA	b3275	rrlD	3425439	3425461	-	CGTTAATCGGGGCAGGGTGAGT	0	0	1	1	TTTACCCTGTCTGTCCATAGTGATTAATGT&CGTTAATCGGGGCAGGGTGAGT	((((((((((((........(((((((((.&))))))))))))))))))))).	-23.7	No	No	Yes
1128202_1	ncRNA	b3864	spf	4049934	4049988	+	CTTTTACTTCACGTAATCGGATTTGGCTGAATATTTTAGCCGCCCCAGTCAGTA	protein_coding	b4015	aceA	4217526	4217591	+	TTGAGCCGGGCGATCCGCGCTATGTCGATTACTTCCTGCCGATCGTTGCCGATGCGGAAGCCGGT	0	0	1	1	ACTTCACGTAATCGGATTTGGCTGAATATTTTAGCCGCCCCAGTCAGT&TTGAGCCGGGCGATCCGCGCTATGTCGATTACTTCCTGCCGATCGTTGCCGATGCGGAAGC	.((((.(((.(((((..(((((.(((((.(((((((((((...((((.&))))...)))))......))))....)).)).)))..)))))......)))))))))))).	-32.8	No	No	Yes
112888_2	ncRNA	b4438	cyaR	2167115	2167139	+	TGAAAAACATAACCCATAAAATGC	antisense_protein_coding	antisense-b3895	antisense-b3895	4086492	4086509	-	TGCCCCACTGGCTGAAA	0	0	5	1	CCCAT&CTGGC	.(((.&.))).	-2.3	No	Yes	No
112946_18	protein_coding	b0957	ompA	1019063	1019122	-	GTGACAACGTGAAACAGCGTGCTGCACTGATCGACTGCCTGGCTCCGGATCGTCGCGTA	rRNA	b2591	rrsG	2730379	2730425	-	GGCCCCCTGGACGAAGACTGACGCTCAGGTGCGAAAGCGTGGGGAG	3.20575e-57	6.12973e-57	1	1	GCGTGCTGCACTGATCGACTGCCTGGCTCCGGATCGTCG&GGACGAAGACTGACGCTCAGGTGCGAAAGCGTGGGGAG	.(.(.((((.((..(((.(.(((((((..(((.(((((.&.)))))...)))..)).))))))))).)).)))).).)	-27.2	No	Yes	No
1129530_1	5UTR	b0155	clcA	174978	175048	+	TGCAATCCTGATTTCTTAGAGTATAAAAGTTTTGTGCATTTGAAACATTACGCTTTGCAAAGGATTTTCA	antisense_tRNA_pseudogene	antisense-b4643	antisense-b4643	2476587	2476629	-	TTTTATGTGGTTTTAGGGATAAACACAAGGATGGTGTCCCCT	1.59135e-24	2.6128e-24	1	1	TGCAATCCTGATTTCTTAGAGTATAAAAG&TTTTATGTGGTTTTAGGGATAAACACAAGGATGGTG	.((.(((((...((((((((((((((((.&)))))))...)))))))))........))))).)).	-12.5	Yes	No	No
1129607_1	ncRNA	b4585	chiX	507218	507286	+	GTGACGGCATAATAATAAAAAAATGAAATTCCTCTTTGACGGGCCAATAGCGATATTGGCCATTTTTT	rRNA	b2589	rrlG	2728673	2728736	-	AGTGAACCAGTACCGTGAGGGAAAGGCGAAAAGAACCCCGGCGAGGGGAGTGAAAAAGAACCT	0	0	1	1	AATTCCTCTTTGACGGGCCAATAGCGATATTGGCCATT&AGTGAACCAGTACCGTGAGGGAAAGGCGAAAAGAACCCCGGCGAGGGGAGTG	.(((((((((...((((((....(((.((((((.(((.&.)))..)))))).)))...))...............))))..))))))))).	-28.2	No	No	Yes
1129749_1	ncRNA	b4432	ryeA	1923048	1923120	+	GTGTTATGGTTGACTATAAAGTCAGCGAAGGAAATGCTTCTGGCTTTTAACAGATAAAAAGAGACCGAACAC	3UTR	b4484	cpxP	4106329	4106370	+	TTTTCCTTGCCATAGACACCATCCCTGTCTTCCCCCACATG	0	0	1	1	GTGTTATGGTTGACTATAAAGTCAGCGAAGGAAAT&TTTTCCTTGCCATAGACACCATCCCTGTCTTCCCCCACATG	((((...((..(((......(((.((.(((((((.&.)))))))))....))).........)))..))...)))).	-16.8	Yes	No	No
1130155_1	ncRNA	b4433	sdsR	1923154	1923172	-	TAGCGCACGGCTCTCTCC	rRNA	b3854	rrlA	4039907	4039971	+	GTGATCCGGTGGTTCTGAATGGAAGGGCCATCGCTCAACGGATAAAAGGTACTCCGGGGATAAC	0	0	1	1	TAGCGCACGGCTCTCTCC&TGGAAGGGCCATCGCTC	.((((.(.((((((.(((&.))))))))).))))).	-16.4	No	No	Yes
1130285_1	ncRNA	b4432	ryeA	1923083	1923158	+	GCTTCTGGCTTTTAACAGATAAAAAGAGACCGAACACGATTCCTGTATTCGGTCCAGGGAAATGGCTCTTGGGAG	protein_coding	b4138	dcuA	4366684	4366749	-	GTTTTGCTGGCGATCTTCTTGGGCGCCAGATTGGGGGGAATAGGTATTGGTTTTGCAGGCGGATT	0	0	1	1	TTCTGGCTTTTAACAGATAAAAAGAGACCGAACACGATTCCTGTATTCGGTCCAGGGAAATGGCTCTTGGGAG&TTTGCTGGCGATCTTCTTGGGCGCCAGATTGGGGGGAATAGGTATTGGTTTTGCAGGCGGAT	.((((.((...............((((((((((....(((((.((.((((((((((((.((.(((...(.((.&.)).).))).)).)))))))..))).)).)).)))))....)).))))))))..)).)))).	-37.9	Yes	No	No
113067_18	inter	int-3322	int-3322	2187315	2187361	-	AGTGGCTAATAATAAAAAATAACAAGGTGTCTGCATTTCCCCCTCA	protein_coding	b3344	tusC	3475031	3475067	-	ATCCGCAGACACCCTTTGTTGTCGAAGCCACGCCGC	0.00498728	0.00624346	4	1	AGTGGCTAATAATAAAAAATAACAAGGTGTCTGCA&CGCAGACACCCTTTGTTGTCGAAGCCACG	.((((((...........((((((((((((((((.&.)))))))))..)))))))...)))))).	-29.6	No	Yes	No
1131258_1	antisense_protein_coding	antisense-b2637	antisense-b2637	2771548	2771572	-	GCATTCCGAACATCAGGGTTAAAC	ncRNA	b4450	arcZ	3350642	3350660	+	TTCCCTGGTGTTGGCGCA	2.08685e-41	3.76125e-41	1	1	GCATTCCGAACATCAGGGT&TCCCTGGTGTTGGCGCA	((...((.((((((((((.&.)))))))))))).)).	-19.9	No	Yes	No
1131599_1	protein_coding	b0014	dnaK	14057	14076	+	AGAAGTCAAAGACAAAAAA	5UTR	b2587	kgtP	2725790	2725807	-	CAAAAAAAATAAACAAA	3.57838e-42	6.48532e-42	2	1	AGTC&AACA	.((.&.)).	0	No	No	Yes
1131764_1	tRNA	b0971	serT	1031620	1031644	-	GAATCTCTGCGCTTCCGCCAAATA	tRNA	b3799	proM	3982707	3982750	+	GAACTAAAAATTCAAAAAGCAGTATTTCGGCGAGTAGCGCAGC	0	0	6	1	TCTGCGCTTCCGCCAAATA&GTATTTCGGCGAGTAGCGCAGC	.(((((((.((((((((((&.))))).)))).).))))))).	-21.5	No	Yes	No
1132416_1	tRNA	b1984	asnW	2058031	2058094	-	AGTTCAGTCGGTAGAACGGCGGACTGTTAATCCGTATGTCACTGGTTCGAGTCCAGTCAGAGG	5UTR	b3458	livK	3597572	3597645	-	ACAGTGCAGTATAAAAAAAGAACAGTCTGATTTGTTAACACATAAAAACAAAGCAACACAACATCACGAATGG	0	0	1	1	GGTAGAACGGCGGACTGTTAATCCGTATGTCACTGG&ACAGTGCAGTATAAAAAAAGAACAGTCTGATTTGTTAACA	.((..((((((((((((((.....((((..(((((.&.)))))..))))........)))))))))..))))).)).	-21.8	No	No	Yes
1133590_1	protein_coding	b0115	aceF	125908	125957	+	TGATTTTCGATTCCGCCGACGGTGCAGCAGACGCTGCACCTGCTCAGGC	rRNA	b3758	rrlC	3945658	3945716	+	TCCGACCTGCACGAATGGCGTAATGATGGCCAGGCTGTCTCCACCCGAGACTCAGTGA	1.76413e-19	2.79615e-19	1	1	TGATTTTCGATTCCGCCGACGGTGCAGCAGACGCTGCACCTGCTCAGGC&ACCTGCACGAATGGCGTAATGATGGCCAGGCTGTCTCCACCCGAGACTCAG	(((.(((((........((((((...((...((.(((.((((..((((.&.))))..))...)).))).))...))...))))))......))))).))).	-24.5	No	Yes	No
1134203_1	protein_coding	b3433	asd	3574023	3574044	-	ACTATTAAATTGAAAAAAGAT	ncRNA	b3864	spf	4049931	4049983	+	GACCTTTTACTTCACGTAATCGGATTTGGCTGAATATTTTAGCCGCCCCAGT	2.39543e-219	6.31906e-219	1	1	TTGAAAAAAGA&CCTTTTACTTCAC	.(((((((((.&.)))))..)))).	-4	No	Yes	No
113440_9	3UTR	b3019	parC	3163539	3163566	-	TTTTCCAGAGAGCGGCTTTTAACAATG	protein_coding	b3092	uxaC	3243354	3243372	-	GCTTTAACAATGCGCGTG	0.00361675	0.00455584	1	1	GAGAGCG&GCTTTA	.(((((.&))))).	-5.6	Yes	No	No
1134924_1	inter	int-1067-1	int-1067-1	2035630	2035701	+	AGCCACTTGCGACGACGTTGCTCAATAAGGAAAATTTGGCGTGAATAATATTCAACACCAGTGCAGCATCA	3UTR	b2904	gcvH	3049091	3049156	-	CTTTATTCCTCTTCTGCGGGAGAGGATCAGGGTGAGGAAAATTTATGCCTCACCCTCACTCTCTT	0	0	1	1	AAGGAAAATTTGGCGTGAATAATATTCAACACCAGTGCAGC&TCTGCGGGAGAGGATCAGGGTGAGGAAAATTTATGCCTCACCCTC	.(((.......(((((((((....(((..((((..(((((.&.)))))............))))..))).)))))))))....))).	-21.9	No	Yes	No
1135053_1	protein_coding	b1048	opgG	1109995	1110055	+	TGGTTATGCCAGGGCGTGACACGGTTGTGGATGTGCAGTCGAAAATCTATCTGCGCGATA	ncRNA	b4450	arcZ	3350641	3350678	+	TTTCCCTGGTGTTGGCGCAGTATTCGCGCACCCCGGT	4.75117e-70	9.52137e-70	1	1	TGCCAGGGCGTGACACGGTTGTGGATGTGCAGTCGAAAATCT&TGGTGTTGGCGCAGTATTCGCGCACCCCGGT	.(((.(((.(((.......(((((((((((.(((((..(((.&.))).)))))))).)))))))))))))))))	-25.4	No	No	Yes
1135108_1	inter	int-1067-1	int-1067-1	2035629	2035698	+	AAGCCACTTGCGACGACGTTGCTCAATAAGGAAAATTTGGCGTGAATAATATTCAACACCAGTGCAGCA	tRNA	b1977	asnT	2044549	2044590	+	CCTCTGTAGTTCAGTCGGTAGAACGGCGGACTGTTAATCCG	0	0	1	1	AGCCACTTGCGACGACGTTGCTCAATAAGGA&CCTCTGTAGTTCAGTCGGTAGAACGGCG	.(((..((((..((((...(((((...(((.&))).)).)))...))))))))...))).	-16	No	Yes	No
1135297_1	protein_coding	b0389	yaiA	407063	407135	+	AACTCAGAGCCGATCATCCTAAACCAGACTCGTTGATCAGTGAACATCCGACCGCTCAGGAAGCGATGGATG	ncRNA	b4450	arcZ	3350641	3350679	+	TTTCCCTGGTGTTGGCGCAGTATTCGCGCACCCCGGTC	2.26428e-20	3.61793e-20	1	1	AGACTCGTTGATCAGTGAACATCCGACCGCTCAGGA&CCCTGGTGTTGGCGCAGTATTCGCGCACCCCGGTC	.(((.((.......(((((.((((((.(((.((((.&.)))))))))))....)).)))))......)))))	-19.6	No	No	Yes
1135372_1	ncRNA	b1954	dsrA	2025242	2025294	-	TGTAACGAATTTTTTAAGTGCTTCTTGCTTAAGCAAGTTTCATCCCGACCCC	3UTR	b2904	gcvH	3049094	3049156	-	CTTTATTCCTCTTCTGCGGGAGAGGATCAGGGTGAGGAAAATTTATGCCTCACCCTCACTCT	0	0	2	1	TTAAGTGCTTCTTGCTTAAGCAAGTTTCATCCCGA&GCGGGAGAGGATCAGGGTGAGGAAAATTTAT	.(((((..(((((((((.......((((.(((((.&.)))))))))....)))))))))..))))).	-19.3	No	Yes	No
1135599_1	protein_coding	b2928	yggC	3074527	3074552	-	TTTTCTTTGCGCTCCGCCGGGGACG	ncRNA	b4450	arcZ	3350641	3350680	+	TTTCCCTGGTGTTGGCGCAGTATTCGCGCACCCCGGTCT	2.10535e-09	3.04561e-09	1	1	TTTGCGCTCCGCCGGGGAC&TTCCCTGGTGTTGGCGCAGT	.(((((((.(((((((((.&.)))))))))..))))))).	-26.9	No	No	Yes
1136412_1	rRNA	b0204	rrlH	227178	227204	+	GGGGGGACGGAGAAGGCTATGTTGGC	3UTR	b4484	cpxP	4106331	4106370	+	TTCCTTGCCATAGACACCATCCCTGTCTTCCCCCACATG	0	0	1	1	GGGGGGACGGAGAAGGCTATGTTGGC&TGCCATAGACACCATCCCTGTCTTCCCCCA	((((((((((.((.((......((((&.))))......)).)).)))))..))))).	-26.3	No	No	Yes
1137210_1	ncRNA	b4442	micA	2814808	2814880	+	GCGCATTTGTTATCATCATCCCTGAATTCAGAGATGAAATTTTGGCCACTCACGAGTGGCCTTTTTCTTTTC	protein_coding	b2905	gcvT	3049921	3049944	-	GAAACCATCTCTCCTTTAGCCGC	3.57437e-221	9.45565e-221	1	1	CCTGAATTCAGAGATGA&CCATCTCTCCTTTAGC	.(((((...(((((((.&.)))))))..))))).	-11.6	No	Yes	No
1137308_1	rRNA	b3854	rrlA	4040130	4040171	+	CTATCTGCCGTGGGCGCTGGAGAACTGAGGGGGGCTGCTCC	rRNA	b3970	rrlB	4171403	4171447	+	AAACTTGCCCCGAGATGAGTTCTCCCTGACCCTTTAAGGGTCCT	2.73257e-59	5.2679e-59	1	1	TATCTGCCGTGGGCGCTGGAGAACTGAGGGGGGCT&TGCCCCGAGATGAGTTCTCCCTGACCCTTTAAGGGTC	.((((.....(((((..((((((((.(..(((((.&.)))))....).)))))))).)).))).....)))).	-32.6	No	Yes	No
1137465_1	antisense_protein_coding	antisense-b0645	antisense-b0645	677111	677128	-	TTTCTTCTTCGCTCAAC	3UTR	MalH	malG	4242535	4242571	-	CTTGTGACTGTTATTCGGCGCTCCACGGAGCGCCTT	0.0398843	0.0468602	1	1	TCGCTCA&GGAGCGC	.(((((.&.))))).	-8.1	No	Yes	No
1137520_1	protein_coding	b0847	ybjL	888292	888350	-	TTTCTTGTTCGGTGCTTATGTATTGCGAATGAACCGCGCGCTGTTGTTCGGCGCAATG	tRNA	b3976	thrU	4175408	4175434	+	GAGCAACTGACTTGTAATCAGTAGGT	8.80164e-11	1.2937e-10	1	1	TGCTTATGTATTGCGAATGAACCGCGCGCTGTTGTTCG&GAGCAACTGACTTGTAATCAGTAGGT	.((((((..(((((((............(.(((((((.&))))))).)..)))))))..))))))	-16.2	No	No	Yes
1137523_1	tRNA	b3276	alaU	3426970	3427026	-	TAGCTCAGCTGGGAGAGCGCCTGCTTTGCACGCAGGAGGTCTGCGGTTCGATCCCG	rRNA	b3970	rrlB	4169549	4169578	+	AACTGCGAATACCGGAGAATGTTATCACG	0	0	1	1	GTCTGCGGTTCGA&GCGAATACCGGAGAA	.(((.(((((((.&.)))..)))).))).	-12.3	Yes	No	No
1137578_1	rRNA	b3851	rrsA	4036698	4036725	+	AAACTGGAGGAAGGTGGGGATGACGTC	rRNA	b4010	rrfE	4213040	4213095	+	GCCTGGCGGCAGTAGCGCGGTGGTCCCACCTGACCCCATGCCGAACTCAGAAGTG	2.14115e-154	5.16699e-154	1	1	CTGGAGGAAGGTGGGGATGACGTC&CGCGGTGGTCCCACCTGACCCCAT	.(((.((.((((((((....(((.&.)))....))))))))..))))).	-24.1	Yes	No	No
1137579_1	rRNA	b0201	rrsH	224938	224965	+	AAACTGGAGGAAGGTGGGGATGACGTC	rRNA	b4010	rrfE	4213040	4213095	+	GCCTGGCGGCAGTAGCGCGGTGGTCCCACCTGACCCCATGCCGAACTCAGAAGTG	1.10063e-112	2.47757e-112	1	1	CTGGAGGAAGGTGGGGATGACGTC&CGCGGTGGTCCCACCTGACCCCAT	.(((.((.((((((((....(((.&.)))....))))))))..))))).	-24.1	Yes	No	No
113797_1	ncRNA	b4445	omrB	2976347	2976390	-	GTGATCCCAGAGGTATTGATAGGTGAAGTCAACTTCGGGTTGA	ncRNA	b3864	spf	4049908	4049948	+	GAGGTAAGATGTTCTATCTTTCAGACCTTTTACTTCACGT	0	0	2	1	GTGATCCCAGAGGTATTGATAGGTGAAGTCAACTTCG&GAGGTAAGATGTTCTATCTTTCAGACCTTTTACTTCACG	((((....((((((.((((.((((((((((.(((((.&)))))..))).))).)))).))))))))))....)))).	-25	Yes	Yes	Yes
11383_311	ncRNA	b4698	mgrR	1622833	1622859	-	ATCCATGCAAGCATTCACCGCCGGTT	protein_coding	b1644	ydhJ	1721308	1721343	+	GTAGTTGCGGTTCTTGCCGGATGGTGGCTGTGGAA	0.000764312	0.000927022	16	1	ATCCATGCAAGCATTCACCGCCGGTT&TGCCGGATGGTGGCTGTGGAA	.(((((...(((...((((((((((.&.))))).))))))))))))).	-22.7	No	No	Yes
1138445_1	inter	int-1781	int-1781	3710610	3710627	-	ACACTCTTTCCCCACAC	inter	int-2012	int-2012	4161053	4161072	-	GAACATACTGGATTGCTCC	0.0357343	0.0422074	1	1	CCCAC&CTGGA	.(((.&.))).	-3	No	Yes	No
11385_311	antisense_protein_coding	antisense-b2782	antisense-b2782	2910790	2910813	+	GTTGTAATTCCTCTGGGGCAACT	ncRNA	b4444	omrA	2976165	2976192	-	GATCCCAGAGGTATTGATTGGTGAGAT	3.33958e-42	5.58008e-42	17	1	GTAATTCCTCTGGGGCA&GATCCCAGAGGTATTGA	.((((.((((((((((.&).))))))))).)))).	-18.5	No	No	Yes
1139732_1	ncRNA	b4432	ryeA	1923075	1923140	+	AAGGAAATGCTTCTGGCTTTTAACAGATAAAAAGAGACCGAACACGATTCCTGTATTCGGTCCAG	protein_coding	b3698	yidB	3877440	3877497	-	GGTCAACACGTAACGCTTTACAGGTGATTATCATGGGGCTTTTTGATGAAGTTGTCG	6.20135e-186	1.56441e-185	1	1	GGAAATGCTTCTGGCTTTTAACAGATAAAAAGAGACCGAACACGATTCCTGTATTCGG&ACGCTTTACAGGTGATTATCATGGGGCTTTTTGATGAAGTTGTCG	.((...(((((.................((((((.((.(....((((((((((..((.&.))...)))))).))))....).)).))))))...)))))..)).	-18.4	No	Yes	No
114026_1	5UTR	b2573	rpoE	2710147	2710193	-	CAGATTCTGTAGACTTATAATGATAGATAATGATCCGTCTACAGCA	ncRNA	b4443	gcvB	2942712	2942753	+	GAAAAGTTTTATCGGAATGCGTGTTCTGGTGAACTTTTGGC	0	0	1	1	ATAGATAATGATCCGTCTACAGCA&AGTTTTATCGGAATGCGTGTTCTGG	.((((..(((.((((..((.(((.&.))).)).))))...)))..)))).	-10.6	Yes	No	No
114051_9	3UTR	b0515	allE	543240	543259	-	TCATACCACTCGCCTGATT	protein_coding	b3965	trmA	4162909	4162934	-	ACACTGAGTAATCAGGCGGTGGTTT	2.03238e-06	2.79307e-06	1	1	TACCACTCGCCTGATT&TAATCAGGCGGTGGTT	.(((((.(((((((((&.)))))))))))))).	-22.6	Yes	No	No
114057_2	protein_coding	b1029	ycdU	1096741	1096758	+	CTATTTTTTCTATTGTC	pseudogene	b2092-1	b2092-1	2174201	2174229	-	TGCTGCCGATTGTCATCATTATTTTTTC	0.000134221	0.000165041	1	1	TATTGT&CCGATT	.((((.&.)))).	-0.7	No	No	Yes
1141456_1	inter	int-653-1	int-653-1	1216683	1216713	+	TTGTCTGTCGCTTTAGACTATACACAGCAT	antisense_protein_coding	antisense-b3708	antisense-b3708	3890104	3890121	-	GAAGTGACGCAATACTT	0.000717725	0.000928871	1	1	TTGTCTGTCGCTTTA&GAAGTGACGCAAT	((((..((((((((.&)))))))))))).	-11.2	No	No	Yes
1141464_1	tRNA	b3799	proM	3982792	3982843	+	AATCCTCTCTCGCCGACCAATTTTGAACCCCGCTTCGGCGGGGTTTTTTGT	antisense_protein_coding	antisense-b3872	antisense-b3872	4060572	4060631	-	CGGAAGATTTTGGATTCTGCCTCGAGGTTCAACAACGCCTGGCGCAGCGTCATACGTTT	0	0	1	1	TCTCTCGCCGACCAATTTTGAACCCCGCTTCGGCGGGGTTTT&TGGATTCTGCCTCGAGGTTCAACAACGCCTGGCGCAGCGT	.(.(((((((.......(((((((.((....((((((((((.&.)))))))))).)).))))))).......))))).)).).	-29	No	Yes	No
1141576_1	inter	int-653-1	int-653-1	1216683	1216713	+	TTGTCTGTCGCTTTAGACTATACACAGCAT	protein_coding	b2597	raiA	2737284	2737342	+	GCCACAAGGGTTTGTTGCTGACGCCACAATCAATACACCTAACGGCGTTCTGGTTGCC	0	0	1	1	TTGTCTGTCGCTTTAGACTATACACAGCA&GCCACAAGGGTTTGTTGCTGACGCCACAAT	((((.((((((..((((((.......((.&))......))))))..)).))))..)))).	-13	No	No	Yes
1142060_1	protein_coding	b0957	ompA	1019940	1020015	-	TGGTTTCGCTACCGTAGCGCAGGCCGCTCCGAAAGATAACACCTGGTACACTGGTGCTAAACTGGGCTGGTCCCA	tRNA	b3799	proM	3982792	3982843	+	AATCCTCTCTCGCCGACCAATTTTGAACCCCGCTTCGGCGGGGTTTTTTGT	0	0	1	1	CAGGCCGCTCCGAAAGATAACACCTGGTACACTGGTGCTAAACTGGGCTGGTC&CGCCGACCAATTTTGAACCCCGCTTCGGCGGGGTTTT	.(((((.(.(((.(((........(((......(((...(((.(((..((((.&.)))).))).)))...)))))))))))).).))))).	-21.9	No	Yes	No
1142533_1	protein_coding	b3433	asd	3574427	3574500	-	ATCAGGACTTTTGTTGGCGGTAACTGTACCGTAAGCCTGATGTTGATGTCGTTGGGTGGTTTATTCGCCAATG	inter	int-4331-1	int-4331-1	4132408	4132445	+	TATTTGCAGTCCGGTTTGCTTTGCATACCGGATTTTC	5.23614e-135	1.22765e-134	1	1	GCGGTAACTGTACCGTAAGCCTGATGTTGATGT&TATTTGCAGTCCGGTTTGCTTTGCATACCGG	.(((((..((((..(((((((.(((((.((((.&)))).))).)).)))))))..))))))))).	-22.6	No	No	Yes
114267_1	5UTR	b1243	oppA	1301025	1301068	+	TCGTCTGAATCACCAGAATAAATAAAGTCGGTGATAGTAATAC	protein_coding	b4015	aceA	4217090	4217131	+	ACTATGGAGCATCTGCACATGAAAACCCGTACACAACAAAT	3.26081e-88	6.4262e-88	1	1	AGTCGGTGATAGTA&ACTATGGAGCATCTGCA	.((.(((((((((.&)))))....)))).)).	-6.5	No	No	Yes
1142852_1	protein_coding	b1761	gdhA	1842361	1842403	+	TTTATATCTATGGATCAGACATATTCTCTGGAGTCATTCCTC	tRNA	b3761	trpT	3947016	3947067	+	CTCTCCGCCCCTGCCAGAAATCATCCTTAGCGAAAGCTAAGGATTTTTTTT	0	0	1	1	TCTATGGATCAGACATATTCTCTGGAGT&CCTGCCAGAAATCATCCTTAGC	.(((.((((...........(((((((.&.)).)))))....)))).))).	-10.1	No	No	Yes
114298_9	3UTR	b1280	yciM	1341802	1341831	+	AGAAAAAGCCTGCCAGGGGAGAAATCGCA	protein_coding	b4016	aceK	4218944	4218961	+	CTCCCGAGCGGCTTTTT	6.72553e-30	1.14145e-29	1	1	GAAAAAGCCTGCCAGGGGAGA&CTCCCGAGCGGCTTTTT	.((((((((.((...(((((.&)))))..))))))))))	-20.5	Yes	No	No
1143070_1	rRNA	b3275	rrlD	3423989	3424031	-	ATCTAAGCACGAAACTTGCCCCGAGATGAGTTCTCCCTGACC	rRNA	b4009	rrlE	4211634	4211692	+	ATCAAATCGTACCCCAAACCGACACAGGTGGTCAGGTAGAGAATACCAAGGCGCTTGA	7.52989e-61	1.46025e-60	1	1	ACTTGCCCCGAGATGAGTTCTCCCTGACC&TGGTCAGGTAGAGAATACCAAGGCGCTTGA	.(..((.((.......(((((((((((((&.)))))))..)))))).....)).))..).	-21.8	No	No	Yes
1143285_1	protein_coding	b0757	galK	788831	788906	-	ACAATATGAAGCAAAAACAGGTATTAAAGAGACTTTTTACGTTTGTAAACCATCACAAGGAGCAGGACAGTGCTG	protein_coding	b4679	yohP	2229012	2229041	+	TTTTCCTGATTGGGCTACTGGTGGTGACT	7.28633e-61	1.41339e-60	1	1	TGTAAACCATCACAAGGAGCAGGAC&TTCCTGATTGGGCTACTGGTGGTGACT	.((..(((((((..((...(((((.&.)))))......))..))))))).)).	-16.5	No	No	Yes
1143769_1	ncRNA	b4585	chiX	507215	507288	+	AAAGTGACGGCATAATAATAAAAAAATGAAATTCCTCTTTGACGGGCCAATAGCGATATTGGCCATTTTTTTA	ncRNA	b4437	sibB	2153645	2153709	+	GAGGGTAGAGCGGGGTTTCCCCCGCCCTGGTAGTCTTAGTAAGCGGGGAAGCTTATGACTAAGA	0	0	2	1	AATGAAATTCCTCTTTGACGGGCCAATAGCGATATTGGCCA&GGGTTTCCCCCGCCCTGGTAGTCTTAGTAAGCGGGGAAGCTTATG	.((((..(((((((..(((..((((...(((.....((((.&.)))).....)))..)))).)))..))......)))))..)))).	-22.3	No	Yes	No
1144029_1	ncRNA	b4443	gcvB	2942700	2942765	+	CTGAGCCGGAACGAAAAGTTTTATCGGAATGCGTGTTCTGGTGAACTTTTGGCTTACGGTTGTGA	protein_coding	b3627	waaR	3802755	3802777	-	TGATCGACTGCGCTCATTGCCT	2.7266e-300	7.83727e-300	1	1	CTGAGCCGGAACGAA&ATCGACTGCGCTCAT	.((((((((..(((.&.))).))).))))).	-12	No	Yes	No
114509_10	protein_coding	b0109	nadC	118046	118078	-	ATTATTGCCTCCGGCTCAGTGCGCCAGGCGGT	pseudogene	b4486	yjiV	4575476	4575509	+	TGCTGATGCTGGGGGCTGGATTCAAAACCGTCA	0.00753982	0.00932999	2	1	TGCCTCCGGCTCAGTG&TGCTGATGCTGGGGGCT	.((((((((((((((.&.))))).))))))))).	-25.3	No	Yes	No
1145272_1	inter	int-653-1	int-653-1	1216682	1216714	+	TTTGTCTGTCGCTTTAGACTATACACAGCATA	ncRNA	b4422	rdlB	1269860	1269924	+	TGGTTTCAAGATTAGCCCCCGTTCTGTTGTCAGGTTTTACCTCTCAACGTGCGGGGGTTTTCTC	0	0	1	1	TCTGTCGCTTTAGACTATACACAGC&TCTGTTGTCAGGTTTTACCTCTCAACGTGCGGGGGT	.((.((((...(((((..((((((.&.)))).))..))))).............)))).)).	-12.7	No	No	Yes
1146431_1	ncRNA	b4438	cyaR	2167114	2167156	+	CTGAAAAACATAACCCATAAAATGCTAGCTGTACCAGGAACC	protein_coding	b2286	nuoC	2403049	2403066	-	CTGGCACAGCTACATTC	1.19784e-14	1.82942e-14	1	1	AAATGCTAGCTGTACCAGG&CTGGCACAGCTACATTC	.((((.(((((((.((((.&)))).))))))))))).	-19.4	No	Yes	No
114645_16	protein_coding	b1189	dadA	1237655	1237695	+	TTGATCGGGAGCCGGGGGCCGCCCTGGAAACCAGTGCCGC	protein_coding	b1677	lpp	1757417	1757470	+	ATAATGAAAGCTACTAAACTGGTACTGGGCGCGGTAATCCTGGGTTCTACTCT	2.40739e-118	5.49498e-118	2	1	TGATCGGGAGCCGGGGGCCGCCCTGGAAACCAGTG&AACTGGTACTGGGCGCGGTAATCCTGGGTTCTACTCT	.((..((((.((((((((((((((((..((((((.&.)))))).))))).)))))..)))))).))))..)).	-38.8	Yes	No	No
1146539_1	ncRNA	b4432	ryeA	1923146	1923207	+	GGCTCTTGGGAGAGAGCCGTGCGCTAAAAGTTGGCATTAATGCAGGCTTAGTTGCCTTGCC	3UTR	b4484	cpxP	4106349	4106370	+	ATCCCTGTCTTCCCCCACATG	0	0	1	1	TGGGAGAGAGC&CCTGTCTTCCC	.((((((.((.&.)).)))))).	-10.8	No	No	Yes
1146578_1	rRNA	b2589	rrlG	2727086	2727149	-	CAGTGTACCCGCGGCAAGACGGAAAGACCCCGTGAACCTTTACTATAGCTTGACACTGAACAT	tRNA	b3976	thrU	4175397	4175430	+	CTCAGTAGGTAGAGCAACTGACTTGTAATCAGT	0	0	1	1	GGCAAGACGGAAAGACCCCGTGAACCTTTACTATAGCTTGACACTGAA&CTCAGTAGGTAGAGCAACTGACTTGTA	.(((((.(((.........................((((..((((((.&.))))).)...))))..))).))))).	-13.6	No	Yes	No
1147374_1	5UTR	b2573	rpoE	2710014	2710096	-	AACCCTTTGCTTGCTCAAATTGCAGCTAATGGAGTGGCGTTTCGATAGCGCGTGGAAATTTGGTTTGGGGAGACTTTACCTC	ncRNA	b4444	omrA	2976102	2976167	-	ATTATTCGGTACGCTCTTCGTACCCTGTCTCTTGCACCAACCTGCGCGGATGCGCAGGTTTTTTT	0	0	3	1	TGCTTGCTCAAATTGCAGCTAATGGAGTGGCGTTTCGATAGCGCGTGGAAATTTGGTTTGGGGAGACTTTACCT&CGGTACGCTCTTCGTACCCTGTCTCTTGCACCAACCTGCGCGGATGCGCAGGTT	.((((((.((..((((.((....((..(((.((...(((((.............(((.(((((((....((((.&.))))..))))))).))))))))....)).)))..)))))))).)).)))))).	-35.2	No	Yes	Yes
1147435_1	ncRNA	b2911	ssrS	3056102	3056170	+	CGACACATTCACCTTGAACCAAGGGTTCAAGGGTTACAGCCTGCGGCGGCATCTCGGAGATTCCCTTC	rRNA	b3758	rrlC	3944602	3944634	+	ACCCGATGCAAACTGCGAATACCGGAGAATGT	2.87932e-194	7.36513e-194	1	1	CACATTCACCTTGAACCAAGGGTTCAAGGGTTACAGCCTGCGGCGGCATCTCGGA&CCCGATGCAAACTGCGAATACCGGAGAATGT	.((((((.((..................(((.......(((((..(((..((((.&.)))))))...)))))...))))).))))))	-18.6	Yes	No	No
114777_9	protein_coding	b3402	yhgE	3532298	3532317	-	TTATGGCGTGCCTGCGACC	tRNA	b3796	argX	3982434	3982460	+	TCCTGTCGGGCGCGCCATTTAGTCCC	6.86677e-05	9.13257e-05	1	1	TATGGCGTGCCTGCGA&CTGTCGGGCGCGCCATT	.((((((((((((((.&.)).)))))))))))).	-23.8	Yes	No	No
114814_1	ncRNA	b4698	mgrR	1622860	1622898	-	AGGAAAATGCCTGTTAGCGTAAAAGCAAAACACAAATC	tRNA	b3277	ileU	3427079	3427118	-	GATAAGGGTGAGGTCGGTGGTTCAAGTCCACTCAGGCCT	0	0	1	1	TGCCTGTTAGCGTAAAAGCAAAACACAAATC&AGGTCGGTGGTTCAAGTCCACTCAGGCC	.(((((..........(((....(((..(((&.)))..))))))..........))))).	-10.5	Yes	No	No
114831_19	3UTR	b2495	yfgD	2618023	2618063	+	CGCGTAGTTCGGATAAGGCGTTCGCGCCGCATCCGACAAT	inter	int-4135-1	int-4135-1	3708203	3708271	+	TTCTGTCACAAATCCGTTAATGGATAGTGAGATATGGGGCGCAAATTTGGCAGGGAAATGTGTGTCGT	3.01635e-11	4.45975e-11	32	1	CGCGTAGTTCGGATAAGGCGTTCGCGCCGCATCCGACAA&CTGTCACAAATCCGTTAATGGATAGTGAGATATGGGGCGCAAATTTGGCAGGGAAATGTGT	(((((..(((...((((((((((...((((((((((((.&.))))..............)))).))).).....))))))...))))...)))..))))).	-19.6	Yes	Yes	Yes
1148835_1	ncRNA	b4704	arrS	3657986	3658041	-	AATATCGAGTCTCCTTGTTTCGACTTAAGCTGGCAATTGGATTGCCAGCTTTCTT	protein_coding	b3895	fdhD	4086256	4086285	+	ATATCTTCGGCATGGATGTCGTTCCTTCC	2.38078e-261	6.53777e-261	1	1	TGGCAATTGGATTGCCAGCTT&CGGCATGGATGTCGTTCCT	.((.(((..(((..((((((.&.))).)))..)))))))).	-10.4	No	Yes	No
1148963_1	rRNA	b3278	rrsD	3428510	3428576	-	GCAAGACCAAAGAGGGGGACCCTCGGGCCTCTTGCCATCGGATGTGCCCAGATGGGATTAGCTTGT	rRNA	b4007	rrsE	4209009	4209073	+	AACGCGTTAAGTCGACCGCCTGGGGAGTACGGCCGCAAGGTTAAAACTCAAATGAATTGACGGG	2.60062e-31	4.45406e-31	1	1	GCAAGACCAAAGAGGGGGACCCTCGGGCCTCTTGCCATCGGATGTGCCCAGATGGGATTAGCTTGT&AACGCGTTAAGTCGACCGCCTGGGGAGTACGGCCGCAAGGTTAAAACTCAAATGAATTGACG	((((.......(((...((((....((((...(((.........(.(((((.(((..(((((.(((&.))).))))).....))).))))).)))).))))....))))....))).......))).).	-32	Yes	No	No
1148983_1	rRNA	b3278	rrsD	3428502	3428574	-	AAGACCAAAGAGGGGGACCCTCGGGCCTCTTGCCATCGGATGTGCCCAGATGGGATTAGCTTGTTGGTGGGG	rRNA	b3851	rrsA	4036393	4036457	+	AACGCGTTAAGTCGACCGCCTGGGGAGTACGGCCGCAAGGTTAAAACTCAAATGAATTGACGGG	3.54011e-29	5.98255e-29	1	1	AGAGGGGGACCCTCGGGCCTCTTGCCATCGGATGTGCCCAGATGGGATTAGCTTGTTGGTGG&ACGCGTTAAGTCGACCGCCTGGGGAGTACGGCCGCAAGGTTAAAACTCA	.(((...((((....((((...(((.........(.(((((.(((.....(((((...(((.&.)))..)))))...))).))))).)))).))))....))))....))).	-33.2	Yes	No	No
1148984_1	rRNA	b3278	rrsD	3428502	3428576	-	GCAAGACCAAAGAGGGGGACCCTCGGGCCTCTTGCCATCGGATGTGCCCAGATGGGATTAGCTTGTTGGTGGGG	rRNA	b3968	rrsB	4167521	4167584	+	AACGCGTTAAGTCGACCGCCTGGGGAGTACGGCCGCAAGGTTAAAACTCAAATGAATTGACGG	4.06589e-31	6.9525e-31	1	1	GCAAGACCAAAGAGGGGGACCCTCGGGCCTCTTGCCATCGGATGTGCCCAGATGGGATTAGCTTGTTGGTGG&ACGCGTTAAGTCGACCGCCTGGGGAGTACGGCCGCAAGGTTAAAACTCAAATGAATTGACG	((((.......(((...((((....((((...(((.........(.(((((.(((.....(((((...(((.&.)))..)))))...))).))))).)))).))))....))))....))).......))).).	-33.4	Yes	No	No
1149395_1	rRNA	b3758	rrlC	3945528	3945611	+	GTGACGCCTGCCCGGTGCCGGAAGGTTAATTGATGGGGTCAGCGCAAGCGAAGCTCTTGATCGAAGCCCCGGTAAACGGCGGC	rRNA	b4009	rrlE	4211319	4211357	+	CGGGTGAAAAGCCCGCTCGCCGGAAGACCAAGGGTTCC	4.7771e-58	9.15763e-58	1	1	TGCCCGGTGCCGGAAGGTTAATTGATGGGGTCAGCGCAAGCGAAGCTCTTGATCGAAGCCCCGG&CGGGTGAAAAGCCCGCTCGCCGGAAGACCAAGGGTT	.(((((((.((((..(((.........((((.....((.....................((((.&))))))....)))))))..))))...)))..)))).	-24.7	No	Yes	No
1149522_1	ncRNA	b4432	ryeA	1923066	1923126	+	AAGTCAGCGAAGGAAATGCTTCTGGCTTTTAACAGATAAAAAGAGACCGAACACGATTCC	inter	int-1697	int-1697	3496966	3496994	-	CCTTTAAAAAATAAAAACAAAAAATAAA	8.0044e-82	1.66499e-81	2	1	CGAAGGA&CCTTTA	.(((((.&))))).	-4.9	No	No	Yes
114957_21	ncRNA	b4436	sibA	2153311	2153336	+	AGGGTTAGGGAGAGGTTTCCCCCTC	5UTR	b3234	degQ	3380623	3380641	+	TTCTCTCCCTCCCCGACT	0.00120506	0.00154625	1	1	AGGGTTAGGGAGAGGT&TTCTCTCCCTCCCCG	.(((..(((((((((.&.))))))))).))).	-20.2	No	Yes	No
1149902_1	protein_coding	b2799	fucO	2931946	2931963	-	GCACTGGCGCAGGCGGC	antisense_protein_coding	antisense-b2961	antisense-b2961	3103114	3103157	-	TAACGGTCGCAACCTGAGTTTGTTGCAACATCACTTCTGAGAG	0.00264188	0.00334186	1	1	GCACTGGCGCAGGCGGC&CGCAACCTGAGTTTGTTGCA	((((.(((.((((..((&.))..)))).))).)).)).	-15.4	Yes	No	No
1149992_1	protein_coding	b3350	kefB	3479220	3479245	-	GATCTTTTACGTTCTGCGGGTGCAG	ncRNA	b4704	arrS	3657985	3658046	-	ATTTAAATATCGAGTCTCCTTGTTTCGACTTAAGCTGGCAATTGGATTGCCAGCTTTCTTT	1.22615e-49	2.29368e-49	1	1	CGTTCTGCGGGTG&AGCTGGCAATTGGATT	.(((((((.(((.&.))).)))...)))).	-8	No	Yes	No
1150588_1	protein_coding	b1687	ydiJ	1767279	1767342	-	AAGCTACGGTATGTTCGGTCACGTCGACGCAGGTGTCTTGCACGTCCGTCCAGCGCTGGATAT	protein_coding	b1687	ydiJ	1768396	1768456	-	CATCGCTGATCTTTACCCCCCGCGGCGGCGGCACCGGCACTAACGGTCAGGCGCTCAACC	0	0	1	1	CGGTCACGTCGACGCAGGTGTCTTGCACGTCCGTCCAGCGCTGGA&CCCCCCGCGGCGGCGGCACCGGCACTAACGGTCAGGCGCTCAACC	.(((..(((((((...((((((.(((.((.(((.((.(((..((.&.))..)))))))))))))..))))))....))).))))....)))	-36	No	No	Yes
1150978_1	protein_coding	b0915	lpxK	968937	969010	+	TGATGCGGTAATCGTCAACGGCGGTGTCCCTCGCAGCGGTGAAATCCCCATGCATCTGCTGCCGGGTCAGGCG	rRNA	b3854	rrlA	4039298	4039361	+	TAAAAACACAGCACTGTGCAAACACGAAAGTGGACGTATACGGTGTGACGCCTGCCCGGTGCC	0.00147813	0.00188823	1	1	CGGTAATCGTCAACGGCGGTGTCCCTCGCAGCGGTGAAATCCCCATGCATCTGCTGCCGGGTCAGGCG&AGCACTGTGCAAACACGAAAGTGGACGTATACGGTGTGACGCCTGCCCGGTGCC	.(((.((((.....(((((((((....(((.((...........((((.((((((..((.(((((((.&.)).))).....)).))..)))))).)))).)).))))))))).))))))))))	-35	No	Yes	No
115108_18	5UTR	b0929	ompF	987003	987045	-	ATTGACAGAACTTATTGACGGCAGTGGCAGGTGTCATAAAAA	3UTR	b1112	bhsA	1169343	1169379	+	TTAATGCCTGCTACTGCTGATTTTTTCCCCGCGACA	1.6887e-133	3.95435e-133	1	1	ACGGCAGTGGCAGGTGTC&AATGCCTGCTACTGCTGA	.((((((((((((((((.&.)))))))))))))))).	-28.1	No	Yes	No
115153_1	rRNA	b3272	rrfF	3423449	3423472	-	CGATGGTAGTGTGGGGTCTCCCC	protein_coding	b3844	fre	4027167	4027198	+	TTGCAGTGAGCGTAATGCGCGGGAAGATCGC	2.86065e-13	3.92692e-13	1	1	TGGGGTCTCCCC&CGGGAAGATCGC	.(.((((((((.&.)))).)))).)	-11.8	Yes	No	No
1151655_1	rRNA	b3854	rrlA	4039133	4039196	+	CAGGTGGTCAGGTAGAGAATACCAAGGCGCTTGAGAGAACTCGGGTGAAGGAACTAGGCAAAA	rRNA	b4009	rrlE	4211730	4211802	+	AACTTCGGGAGAAGGCACGCTGATATGTAGGTGAGGTCCCTCGCGGATGGAGCTGAAATCAGTCGAAGATAC	6.63868e-66	1.31287e-65	1	1	AGGTGGTCAGGTAGAGAATACCAAGGCGCTTGAGAGAACTCGGGTGAAGG&ACTTCGGGAGAAGGCACGCTGATATGTAGGTGAGGTCCCTCGCGGATGGAGCTGAAATCA	.(((..((((.(........(((...(((..(((.((.((((..(((((.&.)))))........................)))).)).))))))..)))).)))).))).	-20.1	Yes	No	No
1151887_1	ncRNA	b4432	ryeA	1923066	1923125	+	AAGTCAGCGAAGGAAATGCTTCTGGCTTTTAACAGATAAAAAGAGACCGAACACGATTC	rRNA	b3851	rrsA	4036338	4036399	+	GCCGTAAACGATGTCGACTTGGAGGTTGTGCCCTTGAGGCGTGGCTTCCGGAGCTAACGCG	0	0	1	1	AGTCAGCGAAGGAAATGCTTCTGGCTTTTAACAGATAAAAAGAGACCGAACACGA&CCGTAAACGATGTCGACTTGGAGGTTGTGCCCTTGAGGCGTGGCTTCCGGAGCTAACG	.((.(((...(((((((((((.(((...((((...(((...((.(.((...(((.&.)))...)).).))...)))...)))).)))...)))))))...))))...))).)).	-29.3	No	No	Yes
115227_2	antisense_protein_coding	antisense-b2930	antisense-b2930	3075319	3075336	+	TCACCGCCCGTCACGCC	ncRNA	b4450	arcZ	3350642	3350680	+	TTCCCTGGTGTTGGCGCAGTATTCGCGCACCCCGGTCT	0.0016996	0.00204181	1	1	CACCGCCCGTCACGCC&TGGTGTTGGCGCAGTATTCGCGCACCCCGGTC	.((((..(((((((((&.))))).))))................)))).	-11.9	No	No	Yes
115258_21	protein_coding	b2507	guaA	2631770	2631794	-	CACCGCGCTATCGGTAAAAACCTG	protein_coding	b2796	sdaC	2929370	2929408	+	CATCGCGATGATCCTGTTCCTGATGCCGATGTACGCAA	1.28212e-13	1.93998e-13	7	1	CGCGCTATCGGTAA&ATGCCGATGTACGCA	.(((.((((((((.&.))))))))..))).	-14.2	No	Yes	No
1153114_1	ncRNA	b4432	ryeA	1923104	1923159	+	AAAAGAGACCGAACACGATTCCTGTATTCGGTCCAGGGAAATGGCTCTTGGGAGA	pseudogene	b2092	gatC	2172887	2172944	-	GAGAAAGTCGTTCTCGCAGAATAATTTTTACCTGAGGGGGAGGTTATCCCCCTTAAC	0	0	1	1	AGACCGAACACGATTCCTGTATTCGGTCCAGGGAAATGGCTCTTGGGAGA&TTCTCGCAGAATAATTTTTACCTGAGGGGGAGGTTA	.((((........(((((.(........(((((((((...((.((.((((&.)))).))))...)))))..))))).))))))))).	-19.3	No	No	Yes
1153287_1	protein_coding	b2027	wzzB	2098274	2098312	-	TTAGGGTAATGATGAGAGTAGAAAATAATAATGTTTCT	ncRNA	b4443	gcvB	2942841	2942900	+	ATTTACCCTGTCTGTCCATAGTGATTAATGTAGCACCGCCTAATTGCGGTGCTTTTTTT	0	0	1	1	TTAGGGTAAT&TTTACCCTGT	.((((((((.&.)))))))).	-10.4	No	Yes	No
1153843_1	3UTR	b0729	sucD	765052	765083	+	TCTGTAATAAGAAATAGCCCTCGCCGCTTCC	ncRNA	b4452	gadY	3664898	3664970	+	TGTTATAACGGTTTATTAGTCTGGAGACGGCAGACTATCCTCTTCCCGGTCCCCTATGCCGGGTTTTTTTTA	0	0	1	1	ATAAGAAATAGCCCTCGCCGCTTCC&TGGAGACGGCAGACTATCCTCTTCCCGGTCCCCTATGCCGGGTTTTTTTTA	.(((((((.(((((((((((((((.&.)))).)))).))..........................))))))))))))	-17.4	No	No	Yes
1154238_1	protein_coding	b1761	gdhA	1842336	1842396	+	CACAATCGTATTAATATATAAGGGTTTTATATCTATGGATCAGACATATTCTCTGGAGTC	ncRNA	b4432	ryeA	1923263	1923310	+	AAAAGCGTGGTGGTCATCAGCTGAAATGTTAAAAACCGCCCGTTCTG	0	0	1	1	AGGGTTTTATATCTATGGATCAGACATATTCTCTGGAGT&TCATCAGCTGAAATGTTAAAAACCGCCCG	.((((...........((....(((((.(((.((((.(.&.).))))..)))))))).....)))))).	-11.9	No	No	Yes
1154491_1	ncRNA	b4432	ryeA	1923066	1923122	+	AAGTCAGCGAAGGAAATGCTTCTGGCTTTTAACAGATAAAAAGAGACCGAACACGA	protein_coding	b2573	rpoE	2710001	2710063	-	GTGGCGTTTCGATAGCGCGTGGAAATTTGGTTTGGGGAGACTTTACCTCGGATGAGCGAGCA	0	0	1	1	GTCAGCGAAGGAAATGCTTCTGGCTTTTAACAGATAAAAAGAGACCGAACACG&GTGGCGTTTCGATAGCGCGTGGAAATTTGGTTTGGGGAGACTTTACCTCGGATGAG	.(((.((.((((((..(((((((((.((..((........(((((....(((.&)))..))))).........))..))...))))..)))))..))).)))))..))).	-19.9	No	No	Yes
115460_16	protein_coding	b0440	hupB	461636	461674	+	CCGCAGACCGGTAAAGAGATCACCATCGCTGCTGCTAA	protein_coding	b3766	ilvL	3950358	3950382	+	TTAGCGTGGTGGTGATTATTATCC	0	0	1	1	CGGTAAAGAGATCACCATCGCTGCTGC&TTAGCGTGGTGGTGATTATTATCC	.(((((...((((((((((((.((((.&.)))))))))))))))).))))).	-25	Yes	No	No
1154787_1	protein_coding	b1656	sodB	1735465	1735528	+	AGCACCATCAGACTTATGTCACTAACCTGAACAACCTGATTAAAGGTACCGCGTTTGAAGGTA	rRNA	b3758	rrlC	3945304	3945366	+	TACCCCAAACCGACACAGGTGGTCAGGTAGAGAATACCAAGGCGCTTGAGAGAACTCGGGTG	1.73237e-11	2.5659e-11	1	1	GCACCATCAGACTTATGTCACTAACCTGAACAACCTGATTAAAGGTACCGCGTTTGAAGGTA&TACCCCAAACCGACACAGGTGGTCAGGTAGAGAATACCAAGGCGCTTGAGAGAACTCGGGTG	.((((......((((.((..((..........(((((((((...((..((.(((((..((((&)))).)))))))..))...)))))))))...........))..)).))))........))))	-28.9	Yes	No	No
1154788_1	protein_coding	b1656	sodB	1735465	1735528	+	AGCACCATCAGACTTATGTCACTAACCTGAACAACCTGATTAAAGGTACCGCGTTTGAAGGTA	rRNA	b3854	rrlA	4039118	4039180	+	TACCCCAAACCGACACAGGTGGTCAGGTAGAGAATACCAAGGCGCTTGAGAGAACTCGGGTG	1.03119e-11	1.53036e-11	1	1	GCACCATCAGACTTATGTCACTAACCTGAACAACCTGATTAAAGGTACCGCGTTTGAAGGTA&TACCCCAAACCGACACAGGTGGTCAGGTAGAGAATACCAAGGCGCTTGAGAGAACTCGGGTG	.((((......((((.((..((..........(((((((((...((..((.(((((..((((&)))).)))))))..))...)))))))))...........))..)).))))........))))	-28.9	Yes	No	No
1155112_1	ncRNA	b4443	gcvB	2942834	2942901	+	CCTGTACATTTACCCTGTCTGTCCATAGTGATTAATGTAGCACCGCCTAATTGCGGTGCTTTTTTTT	protein_coding	b3988	rpoC	4185530	4185550	+	TCTTTGGGCCGGTAAAAGAT	0	0	1	1	CACCGCCTAAT&TTTGGGCCGGTA	.(((((((((.&.)))))).))).	-11.3	No	No	Yes
1155139_1	protein_coding	b1378	pfo	1437540	1437560	-	TTACGATCTGGCACTCAGCC	ncRNA	b1954	dsrA	2025265	2025286	-	ATTTTTTAAGTGCTTCTTGCT	0.0153934	0.018721	1	1	ACGATCTGGCACTC&AAGTGCTTCTTGC	.(((...((((((.&.))))))..))).	-8.1	No	No	Yes
1155221_1	protein_coding	b2422	cysA	2540617	2540635	-	CTTCCACGGCACCGACGT	3UTR	b3870	glnA	4056600	4056620	-	TTTAGTTGCCGTGGAAACTT	4.67904e-08	6.63823e-08	1	1	CTTCCACGGCAC&TTGCCGTGGAAA	.((((((((((.&.)))))))))).	-18.7	No	Yes	No
1155256_1	protein_coding	b2370	evgS	2486261	2486278	+	ATGTTTTTTCTAATGCG	ncRNA	b4691	sroH	4190453	4190486	-	AAAATAAGAACACATGTTCTCATCTTCCAGGAT	4.49913e-10	6.55777e-10	1	1	ATGTTTTTT&TAAGAACAC	.(((((((.&.))))))).	-4	No	No	Yes
1155392_1	protein_coding	b3210	arcB	3350692	3350757	-	ATGAAAGAAGAGTGGCGTCACGACGTAGAAGTGCTGAAAGCGTGGGTGGCAAAAGCCACTAAAAA	tRNA	b3852	ileT	4037143	4037190	+	CTTGTAGCTCAGGTGGTTAGAGCGCACCCCTGATAAGGGTGAGGTCG	0	0	1	1	TGGCGTCACGACGTAGAAGTGCTGAAAGCGTGGGTGGCAAA&CTTGTAGCTCAGGTGGTTAGAGCGCACCCCTGATAAGGGTGAGGTCG	.(((.((((....(((..(((((((..((.(((((.((((.&.)))).))))).))..)))....))))..)))......)))).))).	-30.1	No	No	Yes
1155757_1	protein_coding	b2507	guaA	2632531	2632561	-	TTTCACTTGCCTCGGAATAAGCGTCAATGA	ncRNA	b4704	arrS	3657986	3658054	-	GTAATCCGATTTAAATATCGAGTCTCCTTGTTTCGACTTAAGCTGGCAATTGGATTGCCAGCTTTCTT	2.955439731413e-312	8.59712216444e-312	1	1	TTTCACTTGCCTCGGAATAAGC&CCTTGTTTCGACTTAAGCTGGCAATTGGAT	.((((.(((((((((((((((.&.))))))))))........))))).)))).	-18.3	No	Yes	No
1155968_1	rRNA	b2589	rrlG	2729117	2729182	-	TTAAGCGACTAAGCGTACACGGTGGATGCCCTGGCAGTCAGAGGCGATGAAGGACGTGCTAATCT	ncRNA	b3864	spf	4049899	4049987	+	TAGGGTACAGAGGTAAGATGTTCTATCTTTCAGACCTTTTACTTCACGTAATCGGATTTGGCTGAATATTTTAGCCGCCCCAGTCAGT	0	0	2	1	AGCGACTAAGCGTACACGGTGGATGCCCTGGCAGTCAGAGGCGATGAAGGACGTGCTAATCT&GAGGTAAGATGTTCTATCTTTCAGACCTTTTACTTCACGTAATCGGATTTGGCTGAATATTTTAGCCGCC	.(((.(((((.(((..((((.((..((...(((((.((((((((.(((((((((.((.((((&.)))).))))))))).))..)).).))))).)))....))....))..)).))))..)))))))).))).	-33.2	Yes	No	No
115651_19	protein_coding	b0014	dnaK	13853	13895	+	TATCGAGTCTGCGCTGACTGCACTGGAAACTGCTCTGAAAGG	ncRNA	b4450	arcZ	3350642	3350680	+	TTCCCTGGTGTTGGCGCAGTATTCGCGCACCCCGGTCT	4.97024e-13	7.4678e-13	1	1	TCGAGTCTGCGCTGACTGCACTGGAAA&TTCCCTGGTGTTGGCGCAGTATTCGC	.(((((((((((((((.((...((((.&))))...)))))))))))).))))).	-26.3	No	No	Yes
1156744_1	protein_coding	b0116	lpd	129029	129048	+	CTATGAAACCGCCACCTTC	tRNA	b4369	leuP	4606268	4606286	-	GCGAAGGTGGCGGAATTG	0.00115783	0.00148691	1	1	ACCGCCACCTTC&CGAAGGTGGCGGA	.(((((((((((&.))))))))))).	-22.7	No	Yes	No
115679_16	protein_coding	b1718	infC	1800324	1800359	-	AAGGAAATTAAATTCCGTCCTGGTACAGATGAAGG	ncRNA	b4438	cyaR	2167114	2167157	+	CTGAAAAACATAACCCATAAAATGCTAGCTGTACCAGGAACCA	6.3343e-165	1.55356e-164	9	1	GTCCTGGTACAGA&GCTGTACCAGGAA	.(((((((((((.&.))))))))))).	-20.6	Yes	Yes	Yes
1157137_1	protein_coding	b3404	envZ	3534879	3534925	-	ATGAGCGGGAAATTGAAACCGCGCTTTACCCCGGCAGCATTGAAGT	tRNA	b3977	tyrU	4175495	4175555	+	GGAGCAGACTGTAAATCTGCCGTCACAGACTTCGAAGGTTCGAATCCTTCCCCCACCACC	0.0079615	0.00983071	1	1	ATGAGCGGGAAATTGAAACCGCGCTTTACCCCGGCAGCATTGAAGT&GACTGTAAATCTGCCGTCACAGACTTCGAAGGTTCGAATCCTTCCCCCAC	.((.(.((((((((..((((.((.(((....((((((.(((..(((&.)))...)))))))))....)))...))..))))..)))..)))))))).	-23.7	No	No	Yes
1157455_1	antisense_protein_coding	antisense-b2631	antisense-b2631	2767185	2767205	-	CATGATCCGGCCATATTTCA	ncRNA	b3864	spf	4049934	4049988	+	CTTTTACTTCACGTAATCGGATTTGGCTGAATATTTTAGCCGCCCCAGTCAGTA	5.25479e-119	1.20089e-118	1	1	CCGGCCATATTTC&CGGATTTGGCTGA	.((((((.((((.&.)))).)))))).	-11.2	No	No	Yes
1157852_1	ncRNA	b4432	ryeA	1923066	1923122	+	AAGTCAGCGAAGGAAATGCTTCTGGCTTTTAACAGATAAAAAGAGACCGAACACGA	antisense_protein_coding	antisense-b4464	antisense-b4464	3028301	3028374	-	AAAGCCCAGCATAATACCGGTAACGATATTACAAGTCAGAACGATGAACACGGCACACACCAGGCCAGCCATA	5.5289e-33	9.54993e-33	1	1	AGTCAGCGAAGGAAATGCTTCTGGCTTTTAACAGATAAAAAGAGACCGA&CCGGTAACGATATTACAAGTCAGAACGATGAACACGGCACACACCAGGCCAGCC	.((..((...((...((((((((((((......((((....(..((((.&.))))..)..))))..))))))))...........))))....))..))..)).	-17	No	No	Yes
115855_21	protein_coding	b0022	insA_1	20453	20471	-	CTACTGACGGGGTGGTGC	protein_coding	b3751	rbsB	3937159	3937261	+	AAGCAGTAGTTTTAATCAGGTTGTATGACCTGATGGTGACATAAATACGTCATCGACAGATGAACGTGTAATATAAAGAAAAGCAGGGCACGCGCCACCCTA	6.01814e-13	9.03323e-13	3	1	CGGGGTGGTGC&CGCGCCACCCTA	.((((((((((&.)))))))))).	-20.1	No	Yes	No
1159166_1	ncRNA	b4432	ryeA	1923066	1923131	+	AAGTCAGCGAAGGAAATGCTTCTGGCTTTTAACAGATAAAAAGAGACCGAACACGATTCCTGTAT	protein_coding	b3574	yiaJ	3742496	3742513	-	GAAAAAAAGAGAACGAG	1.18285e-208	3.07706e-208	1	1	CTTCTGGCTTTTA&AAAAAGAGAAC	.((((..(((((.&.))))))))).	-3.5	No	No	Yes
1159373_1	protein_coding	b1713	pheT	1795696	1795726	-	TATTTGACGTGTACCGCGGTAAGGGTGTTG	3UTR	b3967	murI	4166474	4166500	+	TATGCACACCCCGCGCCGCTGAGAAA	4.21491e-05	5.63263e-05	1	1	CGCGGTAAGGGTGTT&CACACCCCGCGCCGCT	.(((((..((((((.&.))))))...))))).	-18.8	No	Yes	No
1159622_1	tRNA	b3760	aspT	3946908	3946928	+	ACGCAGGGGGTCGCGGGTTC	5UTR	b3894	fdoG	4085870	4085913	-	CCCTTCCGCAAAGAAAAATAACTCCCACTCCCTGCACACGCAG	0	0	1	1	CGCAGGGGGTCGCGGGTTC&TAACTCCCACTCCCTGCA	.(((((((((.(.(((((.&.)))))).))))))))).	-22.4	No	Yes	No
116025_16	protein_coding	b2286	nuoC	2403588	2403649	-	CTTACGTCATGCTGTTTGACTTACACGGCATGGACGAACGTCTGCGCACACACCGCGAAGG	ncRNA	b4450	arcZ	3350642	3350680	+	TTCCCTGGTGTTGGCGCAGTATTCGCGCACCCCGGTCT	4.63299e-78	9.50796e-78	2	1	TGACTTACACGGCATGGACGAACGTCTGCGCACACACCGCGAAG&TTCCCTGGTGTTGGCGCAGTATTCGCGCACCCCGGTCT	.(((.....(((..((..((((...((((((..((((((.(((.&)))..))))))..))))))..))))..))..)))))).	-30.6	Yes	No	No
116039_21	rRNA	b0201	rrsH	223888	223940	+	AATGTCTGGGAAACTGCCTGATGGAGGGGGATAACTACTGGAAACGGTAGCT	rRNA	b2591	rrsG	2730897	2730947	-	GGGCCTCTTGCCATCGGATGTGCCCAGATGGGATTAGCTTGTTGGTGGGG	1.68036e-54	3.18865e-54	1	1	TGTCTGGGAAACTGCCTGATGGAGGGGGA&GCCTCTTGCCATCGGATGTGCCCAGATG	.(((((((..((...(((((((((((((.&.)))))).)))))))..)).))))))).	-30.7	No	Yes	No
116043_16	protein_coding	b3528	dctA	3682878	3682908	-	TTTCTCGCAGGTCATCTTCGGCATCATCAA	protein_coding	b3574	yiaJ	3741695	3741737	-	ATTTCTAATGAACTGGGATTTACTGTCAGGGATGACCTGGGC	2.90135e-44	5.31867e-44	2	1	TCGCAGGTCATCTTCGGCAT&CTGTCAGGGATGACCTGGGC	.(.(((((((((((.((((.&.)))).))))))))))).).	-24	Yes	No	No
1161791_1	ncRNA	b4704	arrS	3657984	3658052	-	AATCCGATTTAAATATCGAGTCTCCTTGTTTCGACTTAAGCTGGCAATTGGATTGCCAGCTTTCTTTT	rRNA	b3968	rrsB	4167122	4167186	+	AATACCTTTGCTCATTGACGTTACCCGCAGAAGAAGCACCGGCTAACTCCGTGCCAGCAGCCGC	0	0	1	1	AGCTGGCAATTGGATTGCCAGCTTTCTTTT&CAGAAGAAGCACCGGCTAACTCCGTGCCAGCA	.(((((((..((((..(((.((.(((((((&.)))))))))...)))....))))))))))).	-27.9	Yes	No	No
1162737_1	inter	int-653-1	int-653-1	1216674	1216714	+	ATCTTATTTTTGTCTGTCGCTTTAGACTATACACAGCATA	protein_coding	b4332	yjiJ	4562587	4562660	-	CATCCCGTAGAACGCTTTTCTTTCAGCACCGCGCTTTTCGGGATGCTGGTTCTGACCTTAGGTATGGGTTTAG	1.14502e-104	2.53267e-104	1	1	GTCTGTCGCTTTAGACTATACACAGCATA&GATGCTGGTTCTGACCTTAGGTATGGGT	.(((((..(((((((....((.((((((.&.)))))))))))))....))..))))).	-13.3	No	Yes	No
1163040_1	protein_coding	b1210	hemA	1263832	1263871	+	GGTGCAGGGCGGCGTGGTGCTGTCGACGTGCAACCGCAC	5UTR	b3894	fdoG	4085824	4085863	-	ATGTAAATGGGACGTGACAATGTCGAAACAAGGAGCAAT	2.03915e-45	3.75554e-45	1	1	GGTGCAGGGCGGCGTGGTGCTGTCGACGTGCAACCGCAC&ATGTAAATGGGACGTGACAATGTCGAAACAAGGAGCA	(.(.(..(.((((((.....((((.((((.(....(((.&.))).....).))))))))))))))...)..).).).	-17.1	No	No	Yes
11630_306	antisense_protein_coding	antisense-b0932	antisense-b0932	993038	993062	-	ATCTTATTTTTGTCTGTCGCTTTAGACTATACACAGCATA	protein_coding	b2036	glf	2108202	2108231	-	CATCCCGTAGAACGCTTTTCTTTCAGCACCGCGCTTTTCGGGATGCTGGTTCTGACCTTAGGTATGGGTTTAG	0	0	11	1	GTCTGTCGCTTTAGACTATACACAGCATA&GATGCTGGTTCTGACCTTAGGTATGGGT	.(((((..(((((((....((.((((((.&.)))))))))))))....))..))))).	-13.3	No	No	Yes
1163177_1	ncRNA	b4585	chiX	507215	507285	+	AAAGTGACGGCATAATAATAAAAAAATGAAATTCCTCTTTGACGGGCCAATAGCGATATTGGCCATTTTT	protein_coding	b1677	lpp	1757433	1757458	+	AACTGGTACTGGGCGCGGTAATCCT	0	0	1	1	ACGGGCCAATAGCGATATTGGCCAT&CTGGTACTGGGCGCGG	.((.(((.............((((.&.))))....))).)).	-11.8	No	No	Yes
1163221_1	tRNA	b2695	serV	2818553	2818584	-	CATCCGGGGTTCGAATCCCCGCCTCACCGCC	tRNA	b3852	ileT	4037168	4037200	+	ACCCCTGATAAGGGTGAGGTCGGTGGTTCAAG	7.1668e-225	1.90261e-224	2	1	CGAATCCCCGCCTCACCG&GGGTGAGGTCGGTGGTTCA	.(((((.((((((((((.&.))))))).))).))))).	-25.3	No	Yes	No
116349_9	protein_coding	b1718	infC	1800452	1800524	-	CTGAGAGAAGCTCTGGAGAAAGCAGAAGAAGCCGGAGTAGACTTAGTCGAGATCAGCCCTAACGCCGAGCCG	5UTR	b3936	rpmE	4126912	4126987	+	CTTCGTACGAAATGATCGTATTGAAGCTATACTTTTAACATCGCGTGGTGTCTGGCGTTAGGGCTGGAAGAGCGA	0.00016194	0.000213333	4	1	GTCGAGATCAGCCCTAACGCCGAGCCG&TGGTGTCTGGCGTTAGGGCTGGAAGAGCGA	.(((...(((((((((((((((((((.&.))).)).)))))))))))))).....)))	-33.4	Yes	No	No
1163532_1	protein_coding	b0904	focA	954220	954267	-	CAAAACTGGTTGGCGGCATTTGCTTCTCTCTGGGGCTGATTCTTTGT	inter	int-2710	int-2710	1041942	1041965	-	TTGTCATCAGCCTCAGAGCATTC	9.58182e-23	1.55923e-22	3	1	TCTCTGGGGCTGATT&CATCAGCCTCAGAGC	.(((((((((((((.&.))))))))))))).	-23.2	No	Yes	No
1163653_1	protein_coding	b0624	flc	657870	657926	-	CTTTTAGCAGTTTTTATTGGCGGTGGTACGGGAAGCGTGGCGAGATGGCTGTTAAG	3UTR	b1874	cutC	1958464	1958504	-	CATGTCGCCCAATATGATGCTTGCTCGTACCAGGCCCCTG	9.91446e-296	2.83459e-295	1	1	TGGCGGTGGTACGGGAAGCGTGGCGAGATGG&CATGTCGCCCAATATGATGCTTGCTCGTACCAGGCCC	.(((..((((((((((((((((((((.(((.&))).))))).......)))))).))))))))).))).	-38	No	No	Yes
1164107_1	protein_coding	b1827	kdgR	1910064	1910124	-	TAAAACACTCGCAATGAGGTGATAAATGGCTAACGCAGATCTGGATAAACAGCCTGATTC	ncRNA	b4438	cyaR	2167114	2167144	+	CTGAAAAACATAACCCATAAAATGCTAGCT	0	0	1	1	TGGCTAACGCAGATCTGGA&CCCATAAAATGCTAGCT	.(((((..(((....(((.&.))).....))))))))	-10.2	No	Yes	No
1164138_1	ncRNA	b4438	cyaR	2167114	2167148	+	CTGAAAAACATAACCCATAAAATGCTAGCTGTAC	5UTR	b2154	yeiG	2243843	2243909	+	TACTCACAGCACATTGAATAAACGGTATGATGAAGAAATTGCAAACAACACAACAAGGAGCCACGC	1.10295e-238	2.96265e-238	1	1	ACATAACCCATAAAATGCTAGCTGTA&CACAGCACATTGAATAAACGGTATGA	.(((.(((.....((((...(((((.&.))))).))))........)))))).	-10.8	No	Yes	No
11641_45	protein_coding	b2039	rfbA	2110969	2111008	-	CTTTTAGCAGTTTTTATTGGCGGTGGTACGGGAAGCGTGGCGAGATGGCTGTTAAG	ncRNA	b4438	cyaR	2167114	2167201	+	CATGTCGCCCAATATGATGCTTGCTCGTACCAGGCCCCTG	0	0	48	1	TGGCGGTGGTACGGGAAGCGTGGCGAGATGG&CATGTCGCCCAATATGATGCTTGCTCGTACCAGGCCC	.(((..((((((((((((((((((((.(((.&))).))))).......)))))).))))))))).))).	-38	Yes	Yes	Yes
116446_21	protein_coding	b3714	purP	3895837	3895879	-	ATTTAGCCGGGTCGTTTAACCTCGGGCTGGCAGGGGTGATTT	tRNA	b3761	trpT	3947016	3947036	+	CTCTCCGCCCCTGCCAGAAA	6.3927e-34	1.10828e-33	3	1	GCTGGCAGGGGTGA&CCGCCCCTGCCAGA	.((((((((((((.&.)))))))))))).	-27.6	No	Yes	No
1164870_1	protein_coding	b1492	gadC	1569103	1569156	-	ATGTTGAATTACTGGTTGTTAGTTTCCTGGTGGTACTTGCCCTGCCCTTTATT	ncRNA	b4704	arrS	3657983	3658044	-	TTAAATATCGAGTCTCCTTGTTTCGACTTAAGCTGGCAATTGGATTGCCAGCTTTCTTTTA	2.1978e-244	5.94181e-244	1	1	TGTTGAATTACTGGTTGTTAGTTTCCTGGTGGTACTTGC&TCGAGTCTCCTTGTTTCGACTTAAGCTGGCAATTGGATTGCCAGCT	.((((.....((((((((((((((...(((((.(((((.&.)))))..))........))).)))))))))))))).....)))).	-20.6	No	No	Yes
1165159_1	inter	int-119-1	int-119-1	228673	228739	+	GCTGTTTTGGCGGATTGAGAGAAGATTTTCAGCCTGATACAGATTAAATCAGAACGCAGAAGCGGT	inter	int-2018-1	int-2018-1	4168525	4168584	+	TTTAAAAATCTGGATCAAGCTGAAAATTGAAACACTGAACAACGAGAGTTGTTCGTGAG	6.14663e-33	1.06096e-32	1	1	GCTGTTTTGGCGGATTGAGAGAAGATTTTCAGCCTGATACAGATTA&AAATCTGGATCAAGCTGAAAATTGAAACACTGAACAACGAGAGTTGTT	((..((((.(..(.((.((....((((((((((.(((..((((((.&.))))))..))).))))))))))......)).)))..).))))..)).	-27.4	No	Yes	No
1165457_1	protein_coding	b3317	rplB	3450888	3450917	-	AAAGGCGGTCAGCTGGCACGTTCCGCTGG	rRNA	b3968	rrsB	4167165	4167189	+	TAACTCCGTGCCAGCAGCCGCGGT	0.00506713	0.0063392	1	1	GGCGGTCAGCTGGCACGT&CCGTGCCAGCAGCCGCG	.(((((..(((((((((.&.))))))))).))))).	-28.1	No	No	Yes
1165458_1	rRNA	b0201	rrsH	224277	224301	+	TAACTCCGTGCCAGCAGCCGCGGT	protein_coding	b3317	rplB	3450888	3450917	-	AAAGGCGGTCAGCTGGCACGTTCCGCTGG	0.0119028	0.014549	2	1	CCGTGCCAGCAGCCGCG&GGCGGTCAGCTGGCACGT	.(((((((((.(((((.&.)))))..))))))))).	-28.1	No	No	Yes
1165470_1	ncRNA	b4432	ryeA	1923103	1923175	+	AAAAAGAGACCGAACACGATTCCTGTATTCGGTCCAGGGAAATGGCTCTTGGGAGAGAGCCGTGCGCTAAAA	protein_coding	b3875	ompL	4063881	4063944	-	TTTAATCTGACAGTACGAAATCGCTATAACCATAATAACTATAGTTCAACAGATTTGAGCGGG	1.3104e-38	2.32605e-38	1	1	TCCTGTATTCGGTCCAGGGAAATGGCTCTTGGGAGAGAGCCGTGCG&AGTACGAAATCGCTATAACCATAATAACTATAGTTCAACAGATTTGAGCGGG	.(((((..((((((....(((((((....(((.....((((((((.&.))))).....)))....)))......))))..)))....)))).)))))))	-18.7	No	Yes	No
1166266_1	protein_coding	b2610	ffh	2746551	2746614	-	CAAAGGTTCGCGTAAACGCCGTATTGCTGCCGGTTGCGGTATGCAGGTGCAGGACGTTAACCG	ncRNA	b3864	spf	4049949	4049987	+	ATCGGATTTGGCTGAATATTTTAGCCGCCCCAGTCAGT	1.81708e-162	4.43631e-162	1	1	TATTGCTGCCGGTTGCGGTATGCAGGTGCAGGACGT&TCGGATTTGGCTGAATATTTTAGCCGCCCCAGTCAGT	.(((((((.((((((.(((((.(((.((.((..((.&.))..)))).))).))))).))))))...))).))))	-19.1	No	No	Yes
1166370_1	protein_coding	b2215	ompC	2312681	2312740	-	AAAGTACTGTCCCTCCTGGTCCCAGCTCTGCTGGTAGCAGGCGCAGCAAACGCTGCTGA	rRNA	b2591	rrsG	2730605	2730654	-	CGGCTAACTCCGTGCCAGCAGCCGCGGTAATACGGAGGGTGCAAGCGTT	3.5733e-147	8.54337e-147	1	1	CTGTCCCTCCTGGTCCCAGCTCTGCTGGTAGCAGGCGCAGCA&GGCTAACTCCGTGCCAGCAGCCGCGGTAATACGGAGGGTGCAA	.(((((((((((...((.((.(((((((((.(.((.(.(((.&.)))..).))))))))))))..))))...)).)))))).))).	-36.6	No	No	Yes
1166847_1	protein_coding	b1641	slyB	1720040	1720098	+	GGTGATGATTCCAACGTTATCGGTGCAATTGGCGGTGCTGTTCTTGGTGGTTTCCTGG	ncRNA	b4452	gadY	3664910	3664949	+	TTATTAGTCTGGAGACGGCAGACTATCCTCTTCCCGGTC	0	0	1	1	TATCGGTGCAATTGGCGGTGCTGTTCTTGGTGGTTTCCT&TGGAGACGGCAGACTATCCTCTTCCCGGTC	.(((((.(.((..((.(((.(((((.......((((((.&.))))))))))))))..))..)))))))).	-18.8	No	Yes	No
1167036_1	rRNA	b0205	rrfH	228784	228815	+	CCTGACCCCATGCCGAACTCAGAAGTGAAAC	protein_coding	b1205	ychH	1258850	1258875	+	ATGGTGGTCGGCGTGGGGTATTCAA	9.51053e-162	2.31968e-161	1	1	GACCCCATGCCGAACTCAG&ATGGTGGTCGGCGTGGGGTA	.((((((((((((.((((.&.))).).)))))))))))).	-26	Yes	No	No
1167223_1	protein_coding	b0335	prpE	353722	353739	+	CTGAAAAAATTCCCTAC	protein_coding	b2520	yfhM	2650509	2650540	-	CATTACAGGTTATTTTCCAGGGTAGTTTGCT	0	0	1	1	AAAATTCCCTA&CAGGGTAGTTTG	.(((((((((.&.)))).))))).	-7.9	No	No	Yes
116746_9	inter	int-170-1	int-170-1	321488	321515	+	AATGAGGGGTGGTATGTTGCTAGCCAA	antisense_protein_coding	antisense-b2140	antisense-b2140	2229623	2229644	+	TTGCAGCAAAGCAACCACCTC	0	0	1	1	AGGGGTGGTATGTTGCTAGCC&TGCAGCAAAGCAACCACCTC	.((((((((.(((((((.((.&.))))))..)))))))))))	-20.8	Yes	No	No
116834_1	rRNA	b2589	rrlG	2726300	2726321	-	GTTGAGCTAACCGGTACTAAT	rRNA	b3275	rrlD	3423946	3423985	-	AAGGGTCCTGAAGGAACGTTGAAGACGACGACGTTGATA	7.0569e-06	8.86426e-06	1	1	GTTGAGCTAACCGGTACTA&AGGGTCCTGAAGGAACGTTGAAGACGACG	(((((((...((((..((.&.))..))....))...))).....)))).	-6.2	No	Yes	Yes
11684_60	ncRNA	b4450	arcZ	3350641	3350696	+	TTTCCCTGGTGTTGGCGCAGTATTCGCGCACCCCGGTCTAGCCGGGGTCATTTTT	protein_coding	b4485	ytfR	4451029	4451086	+	GGGAGCACGCTTTACACCGGGGGAAACCATGACGACCGACCAACACCAGGAGATCCT	0	0	179	1	TTCCCTGGTGTTGGCGCAGTATTCGCGCACCCCGGTCTAGCCGGGGTCA&GGAGCACGCTTTACACCGGGGGAAACCATGACGACCGACCAACACCAGGAGAT	.(((((((((((((((..((.........(((((((..((.((.(.((.&.)).).))))....))))))).........))...)).))))))))))).)).	-45	Yes	Yes	Yes
1168602_1	protein_coding	b0606	ahpF	640528	640571	+	TTCTGTACCGAAGACTGAAGGGCAGAAGCTGGCAGGCGCACTG	protein_coding	b2925	fbaA	3071141	3071158	-	CTTCGCACTGCCAGCAG	0.00247554	0.00313833	3	1	AGCTGGCAGGCGC&TCGCACTGCCAGCA	.(((((((((((.&.))).)))))))).	-21.7	No	Yes	No
1169432_1	protein_coding	b1237	hns	1292465	1292527	-	TTTCCTGATCAAGCAATAATCTTTTGTAGATTGCACTTGCTTAAAATCCCGCCAGCGGCGGG	protein_coding	b3544	dppA	3707448	3707519	-	CGTCTGGTTGAATTTAAAATCGGCACCACCGAAGTGATCCCGGGCCTCGCTGAAAAGTGGGAAGTCAGCGA	3.27958e-78	6.73598e-78	1	1	CTTGCTTAAAATCCCGCCAGCGGCGGG&TCCCGGGCCTCGCTGAAAAGTGGGAAGTCAGCGA	.(((((.....((((((((((((((((&.))))....))))))....))))))....)))))	-25.1	No	Yes	No
1169522_1	protein_coding	b0953	rmf	1015861	1015926	+	GACAGGGTAGTAATGGCCTGATTCTGTCTCTTTAAAAAGAAACCTCCGCATTGCGGAGGTTTCGC	ncRNA	b3864	spf	4049898	4049946	+	GTAGGGTACAGAGGTAAGATGTTCTATCTTTCAGACCTTTTACTTCAC	0	0	2	1	GACAGGGTAGTAATGGCCTGATTCTGTCTCTT&TAGGGTACAGAGGTAAGATGTTCTATCTTTCA	((.(((((((.((((..((..((((((((((.&.)))).))))))...)).))))))))))))).	-18.8	Yes	Yes	No
1169568_1	protein_coding	b1512	lsrR	1601203	1601259	-	CAAAGTGAAGAATGAATTATGACAATCAACGATTCGGCAATTTCAGAACAGGGAAT	rRNA	b3970	rrlB	4169070	4169142	+	TACTCCTGACTGACCGATAGTGAACCAGTACCGTGAGGGAAAGGCGAAAAGAACCCCGGCGAGGGGAGTGAA	3.75658e-141	8.90496e-141	1	1	ATTATGACAATCAACGATTCGGCAATTTCAGAACAGGGA&CTCCTGACTGACCGATAGTGAACCAGTACCGTGAG	.(((((((.....((...((((.....((((..(((((.&.))))).))))))))..))......))..))))).	-15	No	No	Yes
1169582_1	inter	int-2999	int-2999	1638714	1638747	-	TTTCCTTGTTGGTTTTTCTCTCTGATATTTTTT	ncRNA	b4456	glmZ	3986584	3986617	+	TGTCATACAGACCTGTTTTAACGCCTGCTCCGT	1.72125e-206	4.4591e-206	1	1	TTGTTGGTTTTTCTCTCTGATAT&TGTCATACAGACCTGTTTTAACGC	.((((((......(((.(((((.&)))))...)))......)))))).	-6.4	No	Yes	No
117005_18	rRNA	b2591	rrsG	2731021	2731039	-	AATGTCTGGGAAGCTGCC	antisense_protein_coding	antisense-b3872	antisense-b3872	4060942	4060973	-	ACCGTCTCTTTTTGGTAGCACTTTTCCCAGA	1.30113e-05	1.75819e-05	1	1	GTCTGGGAAGCTGCC&TGGTAGCACTTTTCCCAGA	.((((((((((((((&.))))))....))))))))	-20.3	No	Yes	No
1170254_1	tRNA	b1984	asnW	2058027	2058085	-	GGTAGAACGGCGGACTGTTAATCCGTATGTCACTGGTTCGAGTCCAGTCAGAGGAGCC	protein_coding	b2682	ygaZ	2809711	2809770	+	GGCCTTTGCGTTCGGTCTGAATGCGACCCGTCTGGGATTCTCTCCTCTCGAAAGCGTTT	0	0	1	1	ACGGCGGACTGTTAATCCGTATGTCACTGGTTCGAGTCCAGTCAGAGGAGCC&CGTTCGGTCTGAATGCGACCCGTCTGGGATTCTCTCCTCTCGA	.(((.(((..(..(((((..............((.(((((.(((((.((((.&.))))..))))).)).))).))....)))))..))))..))).	-23.9	No	Yes	No
117037_9	protein_coding	b0657	lnt	690734	690767	-	ATTTCGCTGATGGGGCTTCAGGCGTTGACCTTT	rRNA	b3854	rrlA	4038935	4039011	+	AAGGGGGGACGGAGAAGGCTATGTTGGCCGGGCGACGGTTGTCCCGGTTTAAGCGTGTAGGCTGGTTTTCCAGGCA	3.39118e-108	7.56115e-108	1	1	TCGCTGATGGGGCTTCAGGCGTTGACCTT&CGGGCGACGGTTGTCCCGGTTTAAGCGT	.(((((((.(((...(((.(((((.(((.&.)))))))).))).))).)))..)))).	-25.6	Yes	No	No
1171275_1	ncRNA	b4443	gcvB	2942740	2942810	+	GTGAACTTTTGGCTTACGGTTGTGATGTTGTGTTGTTGTGTTTGCAATTGGTCTGCGATTCAGACCATGG	protein_coding	b3649	rpoZ	3822154	3822184	+	TTGACCTGGTACTGGTCGCCGCGCGTCGCG	0	0	1	1	TGTGATGTTGTGTTGTTGTGTTTGCAATTGGTCTGCGATTCAGACCATGG&ACCTGGTACTGGTCGCCGCGCGTCGCG	.((((((.((((......................((((.((((((((.((&.)))))).)))))))))))))))))).	-24.5	No	Yes	No
1172785_1	3UTR	b2395	yfeA	2515412	2515443	-	TTAGTTCTTCTTTTCGGATCCGGCACTTCTG	ncRNA	b4443	gcvB	2942698	2942721	+	TCCTGAGCCGGAACGAAAAGTTT	3.91374e-88	8.28564e-88	2	1	TCTTTTCGGATCCGGCA&AGCCGGAACGAAAAGT	.(((((((..((((((.&.)))))).))))))).	-20.6	Yes	No	No
1172984_1	3UTR	b2904	gcvH	3049092	3049155	-	TTTATTCCTCTTCTGCGGGAGAGGATCAGGGTGAGGAAAATTTATGCCTCACCCTCACTCTCT	ncRNA	b4704	arrS	3657983	3658054	-	GTAATCCGATTTAAATATCGAGTCTCCTTGTTTCGACTTAAGCTGGCAATTGGATTGCCAGCTTTCTTTTA	0	0	3	1	TTCCTCTTCTGCGGGAGAGGATCAGGGTGAGGAAAATTTAT&TTAAATATCGAGTCTCCTTGTTTCGACTTAAGCTGGCAATTGGAT	.(((..((((((..(((.(((.(((((.((.....(((((.&.)))))......)).))))).)))..)))..)).)).))..))).	-17.9	No	Yes	No
117299_9	protein_coding	b0001	thrL	214	237	+	ATGCCAGCTTTCGCTAACCACGGCGGGTAATATTCT	protein_coding	b2756	casE	2879921	2879945	-	GATTAGCCTGGTCGTGATTAGCGTGGTGGTGATT	0	0	2	1	TGCCAGCTTTCGCTAACCACGGCGGGTA&AGCCTGGTCGTGATTAGCGTGGTGGTG	.((((.(...((((((.((((((((((.&.))))).))))).)))))).).)))).	-28.8	Yes	No	No
11729_338	5UTR	b3195	mlaF	3340136	3340172	-	TTAGTTCTTCTTTTCGGATCCGGCACTTCTG	protein_coding	b3766	ilvL	3950341	3950375	+	TCCTGAGCCGGAACGAAAAGTTT	0.00310267	0.0036807	23	1	TCTTTTCGGATCCGGCA&AGCCGGAACGAAAAGT	.(((((((..((((((.&.)))))).))))))).	-20.6	No	Yes	No
1173675_1	ncRNA	b4432	ryeA	1923063	1923156	+	ATAAAGTCAGCGAAGGAAATGCTTCTGGCTTTTAACAGATAAAAAGAGACCGAACACGATTCCTGTATTCGGTCCAGGGAAATGGCTCTTGGG	ncRNA	b4439	micF	2313118	2313178	+	ATTTCTGAATGTCTGTTTACCCCTATTTCAACCGGATGCCTCGCATTCGGTTTTTTTTAC	0	0	3	1	AAAAAGAGACCGAACACGATTCCTGTATTCGGTCCAGGGAAATGGCTCTTGGG&TCTGAATGTCTGTTTACCCCTATTTCAACCGGATGCCTCGCATTCGGTTTTTTTTA	.(((((((((((((..(((.....(((((((((..(((((((((((..((((.&.))))..))).))))..))))......))))))))).)))..))))))))))))).	-35.2	No	Yes	Yes
1174332_1	protein_coding	b0025	ribF	21654	21692	+	AGAGTGTGGCGTTGATTACGTGCTGTGCGTGCGTTTCG	ncRNA	b3864	spf	4049945	4049987	+	CGTAATCGGATTTGGCTGAATATTTTAGCCGCCCCAGTCAGT	0	0	1	1	AGAGTGTGGCGTTGATTACGTGCTGTGCGTGCGT&CGTAATCGGATTTGGCTGAATATTTTAGCCGCCCCAGTCA	.((.((.((((((((......(((((.((((((.&))))..)).))..)))........))))).))).)).)).	-19.2	Yes	No	No
1174529_1	tRNA	b1984	asnW	2058029	2058085	-	GGTAGAACGGCGGACTGTTAATCCGTATGTCACTGGTTCGAGTCCAGTCAGAGGAG	protein_coding	b3766	ilvL	3950289	3950353	+	ATTCCTTCGAACAAGATGCAAGAAAAGACAAAATGACAGCCCTTCTACGAGTGATTAGCCTGGT	0	0	1	1	GGTAGAACGGCGGACTGTTAATCCGTATGTCACTGGTTCGAGTCCAGTCAGAGGAG&TTCCTTCGAACAAGATGCAAGAAAAGACAAAATGACAGCCCTTCTACG	.(((((..((.((.((((((.......((((.....(((..(((...((.(((((.&.))))).))....)))....)))..))))...))))))))))))))).	-24.8	No	No	Yes
1174648_1	protein_coding	b1641	slyB	1720032	1720102	+	TTCAGGGCGGTGATGATTCCAACGTTATCGGTGCAATTGGCGGTGCTGTTCTTGGTGGTTTCCTGGGGAA	ncRNA	b4704	arrS	3657989	3658054	-	GTAATCCGATTTAAATATCGAGTCTCCTTGTTTCGACTTAAGCTGGCAATTGGATTGCCAGCTTT	0	0	1	1	CAGGGCGGTGATGATTCCAACGTTATCGGTGCAATTGGCGGTGCTGTTCTTGGTGGTTTCCTGGGGAA&GTCTCCTTGTTTCGACTTAAGCTGGCAATTGGATTGCCAGCTTT	.((((((((..................(((.((((((.((((.........(((.(...(..(((((.&.)))))..)...).)))...)))).)))))).)))))).)))))	-27.4	No	Yes	No
117566_21	protein_coding	b0728	sucC	764145	764181	+	CTCAGCAGGTTGTTGCCGCAGTGGAGGGGAAATAAT	protein_coding	b2582	trxC	2718806	2718831	+	TGCGGACGCTGCGGTCACGACTTGT	0.0397591	0.0467479	5	1	AGCAGGTTGTTGCCGCAGTGGAGGGGA&TGCGGACGCTGCGGTCACGACTTGT	.(((((((((.(((((((((...(.(.&).)...))))))))).)))))))))	-29.6	No	Yes	No
1175814_1	rRNA	b0201	rrsH	224916	224983	+	CTCAAAGGAGACTGCCAGTGATAAACTGGAGGAAGGTGGGGATGACGTCAAGTCATCATGGCCCTTA	protein_coding	b3298	rpsM	3442116	3442170	-	GTACCAAGACCAACGCACGTACCCGTAAGGGTCCGCGCAAACCGATCAAGAAAT	4.93596e-07	6.8843e-07	1	1	AGGTGGGGATGACGTCAAGTCATCATGGCCCTTA&GTAAGGGTCCGCGCAAACCGATCA	.(((.((..((.(((...........((((((((&.)))))))).)))))..)).))).	-19.7	No	Yes	No
1176019_1	protein_coding	b0433	ampG	453296	453360	-	ATTCCTCTGGTCACCGCTGATGGACCGCTACACGCCTCCATTTTTTGGGCGGCGGCGCGGTTGG	ncRNA	b4456	glmZ	3986431	3986475	+	GTAGATGCTCATTCCATCTCTTATGTTCGCCTTAGTGCCTCATA	4.69106e-28	7.87615e-28	1	1	CTGATGGACCGCTACACGCCTCCATTTTTTGGGCGGCGGCGCGGTTGG&TCCATCTCTTATGTTCGCCTTAGTGCCTCAT	.(((.((..(((((................((((((((....((.(((&.))).))....))).))))))))))))))).	-17.3	No	Yes	No
1176081_1	inter	int-1355	int-1355	2769672	2769697	-	ATTCTCCAGGAAAGTTAACTGACTG	ncRNA	b4704	arrS	3658012	3658054	-	GTAATCCGATTTAAATATCGAGTCTCCTTGTTTCGACTTAAG	1.22268e-10	1.79118e-10	1	1	GGAAAGTTAACTGACTG&GAGTCTCCTTGTTTCG	.((((.......((((.&.))))......)))).	-6.6	No	No	Yes
11769_415	pseudogene	b0266	yagB	280434	280464	-	ATACGCTGGGCAGTCATGGGTATGTATATA	ncRNA	b4443	gcvB	2942827	2942864	+	TTCACTTCCTGTACATTTACCCTGTCTGTCCATAGTG	3.2288e-14	4.48305e-14	19	1	ATACGCTGGGCAGTCATGGGTATGTATAT&CTGTACATTTACCCTGTCTGTCCATAGTG	.(((..(((((((.((.(((((((((((.&.))))))..))))))).)))))))..)))	-26.7	No	Yes	No
1177650_1	inter	int-931-1	int-931-1	1746371	1746399	+	TTTGCCTCTTGCCACCTTCCCACTCTGC	3UTR	b3870	glnA	4056560	4056604	-	ACTTTTCGCCTGTCTCTGGCAGGCCTGGGATCGGTGGCAAGCAC	0.000448808	0.000584268	1	1	TCTTGCCACCTTCCCACTCTGC&GGCAGGCCTGGGATCGGTGGCAAGC	.(((((((((.(((((.(((((&.)))))..)))))..))))))))).	-30.1	No	Yes	No
1177916_1	tRNA_pseudogene	b4635	pauD	586061	586082	+	AAGTCGTGGGCCGCAGGTTCG	rRNA	b3854	rrlA	4038669	4038718	+	CCGAAGCTGCGGCAGCGACACTATGTGTTGTTGGGTAGGGGAGCGTTCT	0.00131762	0.00168836	1	1	AGTCGTGGGCCGCAGGTTCG&CCGAAGCTGCGGCAGCGACA	.(((((..(((((((.((((&.)))).))))))).))))).	-29.1	Yes	No	No
117851_15	protein_coding	b0386	proC	404861	404896	-	CTGCAGTGATCGAAGCGATGACGAAGTGTATGGAA	protein_coding	b2479	gcvR	2599905	2599948	+	TTGACACTGTCATCGCAACATTATCTGGTGATCACTGCGTTGG	1.40022e-05	1.89039e-05	2	1	CTGCAGTGATCGAAGCGATGACGAAGTGTA&GACACTGTCATCGCAACATTATCTGGTGATCACTGCGT	.(((((((((((..((((((((..(((((.&.)))))))))))))............))))))))))).	-32.9	Yes	No	No
117892_15	protein_coding	b2509	xseA	2634212	2634263	+	AGAATTTGATCTCGCTCACATGTTACCTTCTCAATCCCCTGCAATTTTTAC	5UTR	b4139	aspA	4368405	4368431	-	ATTCGGTCGATGCAGGGGATAATCGT	0.0405207	0.0475614	5	1	AATCCCCTGCAA&ATGCAGGGGATA	.((((((((((.&.)))))))))).	-19.8	Yes	Yes	No
1178950_1	3UTR	b1677	lpp	1757670	1757693	+	GTGAAAAATGGCGCACATTGTGC	protein_coding	b3161	mtr	3304560	3304602	-	AGCTTTAATTTACTGCCGGTGTATCAGTAATCAGCGGTGCCT	4.4042e-118	1.00375e-117	1	1	TGGCGCACATTGTGC&TGCCGGTGTATCAGTAATCAGCGGTGCCT	.(((((((((((.((&.))))))))..............))))).	-12.4	No	Yes	No
1179045_1	ncRNA	b4432	ryeA	1923084	1923154	+	CTTCTGGCTTTTAACAGATAAAAAGAGACCGAACACGATTCCTGTATTCGGTCCAGGGAAATGGCTCTTG	5UTR	b4220	tamA	4442251	4442287	+	TGAATAGGTCTAAAGTAAAACATAAGAAATATTTGG	0	0	1	1	ACAGATAAAAAGAGACCGAACACGATTCCTGTATTCGG&TGAATAGGTCTAAAGTAAAACATAAGAAATATTTGG	.((((((.....(((((..............((((((.&)))))))))))..................)))))).	-8.5	No	Yes	No
1179549_1	protein_coding	b2095	gatZ	2175182	2175219	-	ATCTTGAAGGCGTGGACATCCCACTGGGCATGATTAG	rRNA	b3756	rrsC	3942037	3942069	+	TGCCCAGATGGGATTAGCTAGTAGGTGGGGTA	4.49778e-83	9.37923e-83	1	1	ATCTTGAAGGCGTGGACATCCCACTGGGCAT&TGCCCAGATGGGATTAGCTAGTAGGTGGGGTA	((((((...((..(...(((((((((((((.&))))))).))))))...)..))...)))))).	-27.8	No	Yes	No
117996_19	antisense_tRNA_pseudogene	antisense-b4643	antisense-b4643	2476591	2476611	-	ATAAACACAAGGATGGTGTC	3UTR	b4484	cpxP	4106331	4106370	+	TTCCTTGCCATAGACACCATCCCTGTCTTCCCCCACATG	1.41681e-117	3.22217e-117	5	1	CACAAGGATGGTGTC&AGACACCATCCCTGTC	.(((.((((((((((&.)))))))))).))).	-20.4	No	Yes	Yes
117998_19	protein_coding	b0925	ldtD	981022	981051	+	TATGATAAAAACAGGGGGCAAGGGATGTT	3UTR	b4484	cpxP	4106331	4106373	+	TTCCTTGCCATAGACACCATCCCTGTCTTCCCCCACATGCTG	1.56791e-247	4.24807e-247	8	1	AGGGGGCAAGGGATGT&CCATCCCTGTCTTCCCCCA	.(((((..(((((((.&.))))))).....))))).	-22.3	No	Yes	Yes
11802_34	protein_coding	b2081	yegQ	2166180	2166205	+	GCCTACTCCGGTCGCTGCCTGCTCT	protein_coding	b3546	eptB	3709899	3709922	-	TGGAGAGGGCGACCGGCGTTGAT	0.000662591	0.000858555	2	1	CCTACTCCGGTCGCTGCCTGCTCT&TGGAGAGGGCGACCGGCGTTGA	.(.((.((((((((..(((.((((&.))))))))))))))).)).).	-25.3	Yes	No	No
1180680_1	rRNA	b3275	rrlD	3426708	3426772	-	TAAGCGTACACGGTGGATGCCCTGGCAGTCAGAGGCGATGAAGGACGTGCTAATCTGCGATAAG	protein_coding	b3646	yicG	3819440	3819468	+	CGCCTTAAGCTGGGATTACCGGTCTTTT	2.72987e-07	3.83018e-07	1	1	CGTACACGGTGGATGCCCTGGCAGTCAGAGGCGA&CGCCTTAAGCTGGGATTACCGGTCT	.(.((.((((((...(((.(((.....((((((.&))))))..)))))).))))))))).	-22.7	Yes	No	No
1181255_1	ncRNA	b4585	chiX	507216	507269	+	AAGTGACGGCATAATAATAAAAAAATGAAATTCCTCTTTGACGGGCCAATAGC	protein_coding	b3150	yraP	3296698	3296726	+	TGCTATGGGCGTAGACGGTGCCAACGAA	5.0762e-76	1.03496e-75	1	1	CGGCATAATAATAAAAAAATGAAATTCCTCTTTGACGGGCCAATAGC&TGCTATGGGCGTAGACGGTGCCA	.((((.....................(((((.....(.(((.(((((&.))))).))).)))).)))))).	-15.9	Yes	No	No
1182379_1	protein_coding	b4469	ygiQ	3161136	3161181	-	CCTTTGATTATTTTTTTATCATTTCTGGAAGCAAAATGAGCTCTA	ncRNA	b4451	ryhB	3580941	3580977	-	CATTGCTCACATTGCTTCCAGTATTACTTAGCCAGC	4.73788e-69	9.45687e-69	9	1	TCTGGAAGCAAAATGAGCT&TGCTCACATTGCTTCCAGT	.((((((((((..(((((.&.)))))..)))))))))).	-24.6	No	No	Yes
1182493_1	ncRNA	b4704	arrS	3658004	3658042	-	AAATATCGAGTCTCCTTGTTTCGACTTAAGCTGGCAAT	5UTR	b3783	rho	3966174	3966245	+	ACATACCTTATTAAGTTTGAATCTTGTAATTTCCAACGCTTCCCGTTTTATCTTAAATGCGAAGTGAACAG	0	0	1	1	CGAGTCTCCTTGTTTCGACTTAAGCTGGC&ACCTTATTAAGTTTGAATCTTGTAATTTCC	.(((....(..(.((((((((((...((.&.))...))))))).))).)..)....))).	-10.1	No	No	Yes
1182648_1	5UTR	b1040	csgD	1103276	1103329	-	AGTTTTATATTTTACCCATTTAGGGCTGATTTATTACTACACACAGCAGTGCA	ncRNA	b4432	ryeA	1923083	1923174	+	GCTTCTGGCTTTTAACAGATAAAAAGAGACCGAACACGATTCCTGTATTCGGTCCAGGGAAATGGCTCTTGGGAGAGAGCCGTGCGCTAAA	0	0	2	1	AGTTTTATATTTTACCCATTTAGGGCTGATTTATTACTACACACAGCAGTGC&ACACGATTCCTGTATTCGGTCCAGGGAAATGGCTCTTGGGAGAGAGCCGTGCGCTA	(((......((((.((((...(((((((.(((...(((....((((..(((.&.))).....))))....))).....))).))))))))))).)))).......))).	-19.6	No	No	Yes
1182653_1	ncRNA	b4443	gcvB	2942735	2942778	+	TTCTGGTGAACTTTTGGCTTACGGTTGTGATGTTGTGTTGTTG	protein_coding	b3605	lldD	3780763	3780792	+	TTGATGTCGTGCGTATGATTGCGCTCGGT	1.22406e-63	2.40235e-63	1	1	TCTGGTGAACTTTTGGCTTACGGT&GTCGTGCGTATGATTGCGCTCGGT	.((((((........((.(((((.&.))))).)).......))).))).	-9.6	No	Yes	No
1182742_1	protein_coding	b0408	secD	427810	427846	+	AACGTTACAAGAAGAAAAAATAACTGCTAAGTCTGT	ncRNA	b4443	gcvB	2942765	2942792	+	TGTTGTGTTGTTGTGTTTGCAATTGGT	0	0	1	1	AACGTTACAAGAA&TGTTGTGTTGTTG	((((.(((((.(.&).))))).)))).	-6.6	No	Yes	No
1183169_1	protein_coding	b1250	kch	1309011	1309036	-	AAAGAATCGGCGCAAAAATAGAGTT	ncRNA	b4704	arrS	3657983	3658048	-	CGATTTAAATATCGAGTCTCCTTGTTTCGACTTAAGCTGGCAATTGGATTGCCAGCTTTCTTTTA	0	0	1	1	AAAGAATCGGCGCAAA&ATTGCCAGCTTTCTTTT	((((((..(((((((.&.))))..))))))))).	-8.3	No	Yes	No
1183175_1	protein_coding	b1176	minC	1225428	1225465	-	CAAATCCCAGCAGAATTTTATGGCAAAGCGGCGCGAC	inter	int-1614	int-1614	3318332	3318350	-	CCAAATCCCAGCAGTATT	1.65676e-14	2.52518e-14	1	1	AGCGGC&CCCAGCA	.((((.&.)).)).	-3.4	No	No	Yes
1183623_1	protein_coding	b1237	hns	1292777	1292822	-	AAGTTGTTGTTAACGAACGTCGCGAAGAAGAAAGCGCGGCTGCTG	rRNA	b3756	rrsC	3942963	3943006	+	ACTGCCAGTGATAAACTGGAGGAAGGTGGGGATGACGTCAAGT	1.26876e-24	2.08405e-24	1	1	AAGTTGTTGTTAACGAACGTCGCGAAGAAGAAAGCGCGGCT&TGCCAGTGATAAACTGGAGGAAGGTGGGGATGACGTCAAGT	.(.(((.(((((.(..((.(..(..((.......((((((.&.))).))).....))...)..).))..)..))))).))).)	-13.1	No	Yes	No
1183722_1	ncRNA	b4585	chiX	507217	507287	+	AGTGACGGCATAATAATAAAAAAATGAAATTCCTCTTTGACGGGCCAATAGCGATATTGGCCATTTTTTT	protein_coding	b1847	yebF	1930137	1930250	-	AAAACGTGATTATCAACAAAATCGCGTGGCGCGTTGGGCAGATGATCAAAAAATTGTCGGTCAGGCCGATCCCGTGGCTTGGGTCAGTTTGCAGGACATTCAGGGTAAAGATG	0	0	2	1	AGTGACGGCATAATAATAAAAAAATGAAATTCCTCTTTGACGGGCCAATAGCGATATTGG&ACAAAATCGCGTGGCGCGTTGGGCAGATGATCAAAAAATTGTCGGTCAGGCCGATCCCG	.(.((((((...((.((((.....(((...((.(((((((((.((((...(((((.(((.&.))).))))).)))).))))))..))).))))).....))))..))...)))).)).).	-31.2	Yes	No	Yes
1184732_1	protein_coding	b2592	clpB	2734156	2734217	-	CATTTAATCTCCAGTAGCAACTTTGATCCGTTATGGGAGGAGTTATGCGTCTGGATCGTCT	ncRNA	b4443	gcvB	2942702	2942766	+	GAGCCGGAACGAAAAGTTTTATCGGAATGCGTGTTCTGGTGAACTTTTGGCTTACGGTTGTGAT	0	0	1	1	AGCAACTTTGATCCGTTATGGGAGGAGTTATGCGTCTGGATCGTCT&CGGAACGAAAAGTTTTATCGGAATGCGTGTTCTGGTGAACTTTTGGCTTACGGTTGTG	.((((((.(((.(((((((.((((....(((((((((((.((((((&.))).))).........))))).)))))))))).)))).....))).))).)))))).	-23.7	No	No	Yes
118514_21,129324_1	rRNA	b2588	rrfG	2726067	2726119	-	CCGATGGTAGTGTGGGGTCTCCCCATGCGAGAGTAGGGAACTGCCAGGCATC	rRNA	b3759	rrfC	3946696	3946742	+	ATTTGCCTGGCGGCCGTAGCGCGGTGGTCCCACCTGACCCCATGCC	0	0	10	2	AGTGTGGGGTCTCCCCATGCGAGAGTAGGGAACTGCCAGGCAT&TTGCCTGGCGGCCGTAGCGCGGTGGTCCCACCTGACCCCATGCC	.((((((((((...(((((((....((.((..((((((((((.&.)))))))))))).)).)))).)))........)))))))))).	-44.5	Yes	Yes	Yes
1185517_1	ncRNA	b4432	ryeA	1923261	1923311	+	TAAAAAGCGTGGTGGTCATCAGCTGAAATGTTAAAAACCGCCCGTTCTGG	ncRNA	b4704	arrS	3657987	3658042	-	AAATATCGAGTCTCCTTGTTTCGACTTAAGCTGGCAATTGGATTGCCAGCTTTCT	0	0	1	1	AAAAGCGTGGTGGTCATCAGCTGAAATGTTAAAAACC&TGTTTCGACTTAAGCTGGCAATTGGATTGCCAGCTTTC	.(((((.((((((((.((((((.....(((..((((.&.)))).)))...))))))......))))))))))))).	-21	No	Yes	No
1185623_1	protein_coding	b3843	ubiD	4026231	4026261	+	GGCGATTACCACCCGTATGGACCCGGCGCG	5UTR	b3894	fdoG	4085824	4085859	-	AAATGGGACGTGACAATGTCGAAACAAGGAGCAAT	4.75932e-140	1.12571e-139	1	1	GGCGATTACCACCCGTA&AATGGGACGTGACAATGTCG	((((.((((..(((((.&.)))))..))))...)))).	-11.5	No	No	Yes
118595_18	5UTR	b2614	grpE	2750779	2750807	-	GATTGATGACAATGTGAGTGCTTCCCTT	ncRNA	b4456	glmZ	3986563	3986620	+	TTGAGTGAAGCACCCACTTGTTGTCATACAGACCTGTTTTAACGCCTGCTCCGTAAT	7.31342e-09	1.05047e-08	1	1	TTGATGACAATGTGAGTGCTTCCCTT&TGAGTGAAGCACCCACTTGTTGTCAT	.(((((((((.(((.(((((((.(((&.))).))))))).)))))))))))).	-26.2	No	Yes	No
1186172_1	5UTR	b0957	ompA	1020119	1020170	-	ATAAGCCGAAGATATCGGTAGAGTTAATATTGAGCAGATCCCCCGGTGAAG	protein_coding	b2152	yeiB	2242917	2242984	-	ATTAAAAGGCAGGAACCATGGAGCGCAACGTCACGCTCGATTTTGTTCGCGGCGTCGCCATTCTGGG	4.13634e-84	8.66645e-84	1	1	AGCCGAAGATATCGGTAGAGTTAATATTGAGCAGATCCCCCGGTG&AACCATGGAGCGCAACGTCACGCTCGATTTTGTTCGCGGCG	.((((..((((..(((.((((..((.(((.((...(((...(((.&.)))..))))).))).))...)))).))).))))..)))).	-21.6	No	Yes	No
118625_21	protein_coding	b1676	pykF	1757049	1757085	+	GGTTTCTGGTGCACTGGTACCGAGCGGCACTACTAA	ncRNA	b4438	cyaR	2167114	2167170	+	CTGAAAAACATAACCCATAAAATGCTAGCTGTACCAGGAACCACCTCCTTAGCCTG	1.67847e-75	3.41657e-75	3	1	GGTTTCTGGTGCACTGGTACCGAGCGGC&CCCATAAAATGCTAGCTGTACCAGGAACCA	(((((((((((((((((((......((.&.))......)))))).))))))))))))).	-29.8	No	Yes	No
118648_19	protein_coding	b0861	artM	900946	900975	-	TAATGGTGTTCGGTGCGGCAGGGATTATT	3UTR	b4484	cpxP	4106330	4106371	+	TTTCCTTGCCATAGACACCATCCCTGTCTTCCCCCACATGC	2.84247e-114	6.4178e-114	2	1	AATGGTGTTCGGTGCGGCAGGGAT&TTCCTTGCCATAGACACCATC	.((((((((...((.((((((((.&.)))))))).)))))))))).	-24.2	No	No	Yes
1186745_1	rRNA	b0204	rrlH	226624	226687	+	CTGTTTCGGCAAGGGGGTCATCCCGACTTACCAACCCGATGCAAACTGCGAATACCGGAGAAT	inter	int-297	int-297	543191	543237	-	TTTAGCTATGTTGGATTTTGCCACGGTTTATACCGTGGCTTTTTTT	8.70267e-207	2.2553e-206	1	1	CAAGGGGGTCATCCCGACTTACCAACCCGATGCAAACTGCGAA&GTTGGATTTTGCCACGGTTTATACCGTGGCTTTTTTT	.(((((((((((..............(((..(((((.(.(((.&.))).).)))))..)))........))))))))))).	-15.6	Yes	No	No
1186938_1	inter	int-1781-1	int-1781-1	3710739	3710771	+	ATTTCGTTGATGCGTTTGATGCACACGGAAGC	antisense_protein_coding	antisense-b3906	antisense-b3906	4099078	4099097	-	AGCAACTCAGCCATTTCGT	0.0307921	0.036583	1	1	TCGTTGATGCGTTTGATGCA&AGCAACTCAGCCATTTCGT	.((..((((.(.(((((((.&.)))..))))))))).)).	-7.8	No	No	Yes
1187123_1	rRNA	b2589	rrlG	2728657	2728706	-	AAGAACCCCGGCGAGGGGAGTGAAAAAGAACCTGAAACCGTGTACGTAC	ncRNA	b4443	gcvB	2942696	2942719	+	CTTCCTGAGCCGGAACGAAAAGT	0	0	1	1	CCCGGCGAGGGGAGT&CTTCCTGAGCCGGA	.(((((..((((((.&))))))..))))).	-21	Yes	No	No
1187131_1	protein_coding	b2128	yehW	2216190	2216261	-	AATTGCTGTCACTCGCCCGTGGGGCGCGGAATTTCGCCCACTGGTGGAAACTATTGCCGCCGTTGGACAGA	ncRNA	b4443	gcvB	2942696	2942719	+	CTTCCTGAGCCGGAACGAAAAGT	1.39065e-54	2.63956e-54	1	1	CCGTGGGGCGCGGAAT&CTTCCTGAGCCGGAACGA	.(((..(((.(((((.&.)))).).)))...))).	-12.8	Yes	No	No
1187161_1	antisense_protein_coding	antisense-b1730	antisense-b1730	1812811	1812828	+	TTTATTTATACCTCTTA	ncRNA	b4443	gcvB	2942696	2942719	+	CTTCCTGAGCCGGAACGAAAAGT	0	0	1	1	CCTCT&TGAGC	.(((.&.))).	-2.3	Yes	No	No
1187265_1	ncRNA	b4443	gcvB	2942695	2942767	+	ACTTCCTGAGCCGGAACGAAAAGTTTTATCGGAATGCGTGTTCTGGTGAACTTTTGGCTTACGGTTGTGATG	tRNA	b3976	thrU	4175394	4175434	+	TAGCTCAGTAGGTAGAGCAACTGACTTGTAATCAGTAGGT	0	0	5	1	ACTTCCTGAGCCGGAACGAAAAGTTTTATCGGAATGCGTGTTCTGGTGAACTTTTGGCTT&TAGCTCAGTAGGTAGAGCAACTGACTTGTAATCAGTAGGT	((((.((((...........(((((.............(((((((.(..(((...((((.&.)))).))).).)))))))...)))))....)))).))))	-17.9	Yes	Yes	No
11872_17	rRNA	b3968	rrsB	4167092	4167123	+	TTTATTTATACCTCTTA	5UTR	b3980	tufB	4175833	4175873	+	CTTCCTGAGCCGGAACGAAAAGT	1.13909e-85	2.23179e-85	3	1	CCTCT&TGAGC	.(((.&.))).	-2.3	Yes	No	No
11876_44	protein_coding	b0131	panD	146599	146690	-	TTCGCACGATGCTGCAGGGCAAACTCCACCGCGTGAAAGTGACTCATGCGGACCTGCACTATGAAGGTTCTTGCGCCATTGACCAGGATTT	ncRNA	b4450	arcZ	3350642	3350681	+	TTCCCTGGTGTTGGCGCAGTATTCGCGCACCCCGGTCTA	8.46472e-111	1.89805e-110	17	1	TGCTGCAGGGCAAACTCCACCGCGTGAAAGTGACTCATGCGGACCTGCACTATGAAGGTTCTTGCGCCATTGACCAGGA&CCCTGGTGTTGGCGCAGTATTCGCGCACCCCGGTC	.((((..(((...........((((((.........((((......................(((((((...((((((.&.))))))..))))))))))))))))).))))))).	-32.8	Yes	Yes	Yes
118775_15	ncRNA	b4450	arcZ	3350641	3350681	+	TTTCCCTGGTGTTGGCGCAGTATTCGCGCACCCCGGTCTA	protein_coding	b4221	tamB	4447678	4447704	+	AATTTAGCGCTCGACACCCAGGGAGT	5.49719e-45	1.01094e-44	6	1	TTTCCCTGGTGTTGGCGCA&AGCGCTCGACACCCAGGGAGT	.(((((((((((((((((.&.)))).))))))).)))))).	-28.7	Yes	No	Yes
1187915_1	ncRNA	b4443	gcvB	2942696	2942721	+	CTTCCTGAGCCGGAACGAAAAGTTT	protein_coding	b3296	rpsD	3441268	3441290	-	TTGTTAACATCGCTTCTTATCA	5.93355e-56	1.12966e-55	1	1	CTGAGCCGGAACGAA&ATCGCTTCTTATCA	.(((...(((((((.&.))).))))..)))	-6	Yes	No	No
118838_21	ncRNA	b4443	gcvB	2942842	2942881	+	TTTACCCTGTCTGTCCATAGTGATTAATGTAGCACCGCC	rRNA	b3854	rrlA	4038840	4038862	+	GTTAATCGGGGCAGGGTGAGTC	0	0	1	1	TTTACCCTGTCTGTCCATAGTGATTAATG&GTTAATCGGGGCAGGGTGAGT	((((((((((((........((((((((.&)))))))))))))))))))).	-21.9	No	No	Yes
1188483_1	ncRNA	b1954	dsrA	2025240	2025274	-	CTTCTTGCTTAAGCAAGTTTCATCCCGACCCCCT	ncRNA	b4443	gcvB	2942696	2942757	+	CTTCCTGAGCCGGAACGAAAAGTTTTATCGGAATGCGTGTTCTGGTGAACTTTTGGCTTAC	0	0	1	1	TTAAGCAAGTTTCATCCCGAC&ATCGGAATGCGTGTTCTGGTGAACTTTTGGCTTAC	.((((((((.((((((((((.&.))))............)))))))))...))))).	-12.9	Yes	No	No
118859_15	rRNA	b3851	rrsA	4036215	4036238	+	TAGCGGTGAAATGCGTAGAGATC	protein_coding	b3886	yihY	4076307	4076353	+	TTTGCGCTTTTCGCCGCTTTTCCCATGTTTTCCGACGTCAGCATTC	3.37022e-83	7.02988e-83	2	1	TAGCGGTGAAATGCGTAGAG&TTTGCGCTTTTCGCCGCTT	.((((((((((.(((((((.&))))))).)))))))))).	-25.9	Yes	No	No
11890_44	ncRNA	b4438	cyaR	2167113	2167193	+	GCTGAAAAACATAACCCATAAAATGCTAGCTGTACCAGGAACCACCTCCTTAGCCTGTGTAATCTCCCTTACACGGGCTT	protein_coding	b3750	rbsC	3936056	3936105	+	CTATTGCTGCGGTGGTTCTGGGCGGTACGAGTCTGGCGGGCGGAAAAGG	1.793e-227	4.77011e-227	8	1	ACCCATAAAATGCTAGCTGTACCAGGAACCACCTCCTTAGCC&TGCTGCGGTGGTTCTGGGCGGTACGAGTCTGGCGGGC	.(((.......((((((((((((.(((((((((....((((.&.)))).)))))))))....))))).)).)))))))).	-33.4	Yes	No	No
118955_18	protein_coding	b0417	thiL	436355	436382	+	TTCTGATGCGCTTTCTCGCCATGTTGA	protein_coding	b2688	gshA	2815146	2815173	-	ATTAACGGCGGCGAAGCGTATCAGAAA	0.000412312	0.000537316	2	1	TTCTGATGCGCTTTCTCGCCATGTTGA&ATTAACGGCGGCGAAGCGTATCAGAAA	((((((((((((((.(((((..(((((&.)))))))))).)))))))))))))).	-31.9	No	Yes	No
1189664_1	tRNA	b0203	alaV	225511	225574	+	CAGCTGGGAGAGCGCCTGCTTTGCACGCAGGAGGTCTGCGGTTCGATCCCGCATAGCTCCACC	ncRNA	b4585	chiX	507216	507288	+	AAGTGACGGCATAATAATAAAAAAATGAAATTCCTCTTTGACGGGCCAATAGCGATATTGGCCATTTTTTTA	0	0	1	1	TGGGAGAGCGCCTGCTTTGCACGCAGGAGGTCTGCGGTTCGATCCCGCATAGCTCCACC&AGTGACGGCATAATAATAAAAAAATGAAATTCCTCTTTGACGGGCCAATAGCGATATTGGCCATTTTTTT	.((((((..(((((((..((.(((((((((....((...............(((.(((.&.)))..)))...............)).....)))))).).)).))....)))).....)))..)))))).	-22.2	No	Yes	No
1189680_1	5UTR	b2573	rpoE	2710021	2710039	-	ATTTGGTTTGGGGAGACT	ncRNA	b4704	arrS	3657985	3658052	-	AATCCGATTTAAATATCGAGTCTCCTTGTTTCGACTTAAGCTGGCAATTGGATTGCCAGCTTTCTTT	0	0	1	1	TTTGGTTTGGGGAGACT&GAGTCTCCTTGTTTCGAC	.((((...(((((((((&.)))))))))...)))).	-14.5	No	Yes	No
118969_3	protein_coding	b1162	bluR	1213359	1213379	-	TTTACAACACTGGGGTGAGC	ncRNA	b4450	arcZ	3350642	3350662	+	TTCCCTGGTGTTGGCGCAGT	2.23549e-23	3.361e-23	2	1	ACAACACTGGGGT&TCCCTGGTGTTGG	.(((((((((((.&.))))))))))).	-18.2	No	Yes	No
1189832_1	ncRNA	b4452	gadY	3664889	3664921	+	AACAGGGAGTGTTATAACGGTTTATTAGTCTG	rRNA	b4009	rrlE	4212430	4212481	+	GTGATCCGGTGGTTCTGAATGGAAGGGCCATCGCTCAACGGATAAAAGGTA	0	0	1	1	GGAGTGTTATAACGGTTTATT&GTGATCCGGTGGTTCTGAATGGAAGGGCCATCGCTCA	.(((((......(((.((((.&)))).))).......................))))).	-8.8	No	No	Yes
1190198_1	ncRNA	b4452	gadY	3664889	3664922	+	AACAGGGAGTGTTATAACGGTTTATTAGTCTGG	tRNA	b3853	alaT	4037269	4037323	+	CTCAGCTGGGAGAGCGCCTGCTTTGCACGCAGGAGGTCTGCGGTTCGATCCCGC	0	0	1	1	AGGGAGTGTTATAACGGTTTATTAGTCTGG&TCAGCTGGGAGAGCGCCTGCTTTGCACGCAGGAGGTCTGCGGTTCGATCCCG	.((((((((.....((.(((.((((.(((.&.))))))).))).))........))))....................)))).	-14.9	No	No	Yes
1190206_1	protein_coding	b1815	yoaD	1899506	1899523	+	CCCAGCCATTTTCGCCG	ncRNA	b3864	spf	4049967	4049988	+	TTTTAGCCGCCCCAGTCAGTA	2.03041e-08	2.89701e-08	1	1	CGCC&CGCC	.((.&.)).	-1.5	No	No	Yes
1190938_1	antisense_protein_coding	antisense-b1197	antisense-b1197	1246968	1246985	+	CCATTTTTCGGTGTTTT	inter	int-3011	int-3011	1647052	1647104	-	CATTTTCGGGTGGTTTGTTACTTGTTTTACCGGGGATATGCCAGAAACGCGC	0	0	1	1	CCATTTTTCGGTGT&TTACCGGGGATATGC	.((((((((((((.&.))))))))).))).	-9.7	No	No	Yes
1191281_1	tRNA	b1989	asnV	2062260	2062323	+	CCTCTGTAGTTCAGTCGGTAGAACGGCGGACTGTTAATCCGTATGTCACTGGTTCGAGTCCAG	inter	int-2078-1	int-2078-1	4263195	4263247	+	TACAGCCGAACTATAAAAAGAAAGGGCTTCCCAGGTGGAAGCCCTATTTCTT	0	0	1	1	CCTCTGTAGTTCAGTCGGTAGAACGGCGGACTGTT&TACAGCCGAACTATAAAAAGAAAGGGCTTCCCAGGTGGA	((((((.(((((..((..........(((.((((.&.)))))))...........))..)))))...)))).)).	-18.5	No	Yes	No
1191479_1	tRNA	b2816	metV	2947625	2947656	+	GTAGCTCGTCGGGCTCATAACCCGAAGGTCG	tRNA	b3760	aspT	3946892	3946955	+	AGAATACCTGCCTGTCACGCAGGGGGTCGCGGGTTCGAGTCCCGTCCGTTCCGCCACCCTAAT	0	0	1	1	GTAGCTCGTCGGGCTCATAACCCGAAGGTCG&GGGGTCGCGGGTTCGAGTCCCGTCCGTTCCGCC	((.(..((.(((((((..((((((..(.((.&.)).)..)))))).))).))))..))..).)).	-23.9	Yes	No	No
11914_333	protein_coding	b0924	mukB	980248	980269	+	CCTCTGTAGTTCAGTCGGTAGAACGGCGGACTGTTAATCCGTATGTCACTGGTTCGAGTCCAG	protein_coding	b3073	patA	3220100	3220135	+	TACAGCCGAACTATAAAAAGAAAGGGCTTCCCAGGTGGAAGCCCTATTTCTT	0	0	16	1	CCTCTGTAGTTCAGTCGGTAGAACGGCGGACTGTT&TACAGCCGAACTATAAAAAGAAAGGGCTTCCCAGGTGGA	((((((.(((((..((..........(((.((((.&.)))))))...........))..)))))...)))).)).	-18.5	No	Yes	No
1191506_1	ncRNA	b4417	rybB	888012	888033	-	CATTTTGTGGAGCCCATCAAC	ncRNA	b4422	rdlB	1269862	1269924	+	GTTTCAAGATTAGCCCCCGTTCTGTTGTCAGGTTTTACCTCTCAACGTGCGGGGGTTTTCTC	0	0	1	1	TGTGGAGCCCATCAAC&TGTTGTCAGGTTTTACC	.((((((((...((((&.))))...)))))))).	-11.9	No	No	Yes
1191881_1	protein_coding	b3516	gadX	3664909	3664986	-	GAGTTTTACTCAGACATAAAAAAAACCCGGCATAGGGGACCGGGAAGAGGATAGTCTGCCGTCTCCAGACTAATAAA	protein_coding	b3830	ysgA	4016146	4016198	-	AACATTTTTATAAGGGTACGGAGAATACCATGGCAACAACACAACAATCTGG	0	0	1	1	ACCGGGAAGAGGATAGTCTGCCGTCTCCAGACTA&GGGTACGGAGAATACCATGGCAACAACACAACAATCTGG	.(((((............((((((((((..(((.&.)))..)))))......)))))............)))))	-18.3	No	Yes	No
1192123_1	rRNA	b0204	rrlH	226657	226689	+	ACCCGATGCAAACTGCGAATACCGGAGAATGT	3UTR	b4037	malM	4250486	4250532	+	GTGCTGATTTTGCAACAACTGGTGCGTCTCCTGGCGCACCTTTTTT	0	0	1	1	CTGCGAATACCGGAGAATGT&TGCGTCTCCTGGCGCAC	.((((....((((((.((((&.)))))))).)))))).	-13.7	No	Yes	No
1192135_1	rRNA	b2589	rrlG	2728254	2728286	-	AACCCGATGCAAACTGCGAATACCGGAGAATG	ncRNA	b4443	gcvB	2942732	2942770	+	GTGTTCTGGTGAACTTTTGGCTTACGGTTGTGATGTTG	0	0	1	1	AACCCGATGCAAACTGCGAATACCGGAGA&GTTCTGGTGAACTTTTGGCTTACGGTTG	((((....((..........((((((((.&.))))))))........))....)))).	-13.3	No	Yes	No
1192245_1	tRNA	b1984	asnW	2058029	2058102	-	TCCTCTGTAGTTCAGTCGGTAGAACGGCGGACTGTTAATCCGTATGTCACTGGTTCGAGTCCAGTCAGAGGAG	antisense_ncRNA	antisense-b4452	antisense-b4452	3664910	3664983	-	TTTTACTCAGACATAAAAAAAACCCGGCATAGGGGACCGGGAAGAGGATAGTCTGCCGTCTCCAGACTAATAA	0	0	2	1	AGTTCAGTCGGTAGAACGGCGGACTGTTAATCCGTATGTCACTGGTTCGAGTCCAGTCAGAGG&ACTCAGACATAAAAAAAACCCGGCATAGGGGACCGGGAAGAGGATAGTCTGCCGTCTCCAGACTAATA	.(((.((((((.((.(((((((((((((..(((.((((((...((((........(((.(((.&.))).)))........)))).)))))).)))...........))))))))))))))))).))))))).	-47.8	No	Yes	Yes
1192460_1	protein_coding	b2154	yeiG	2243834	2243910	+	AGTGAAAGTTACTCACAGCACATTGAATAAACGGTATGATGAAGAAATTGCAAACAACACAACAAGGAGCCACGCA	tRNA	b3761	trpT	3946994	3947057	+	ACCGGGTGTTGGGAGTTCGAGTCTCTCCGCCCCTGCCAGAAATCATCCTTAGCGAAAGCTAAG	3.48959e-151	8.37791e-151	1	1	AGTGAAAGTTACTCACAGCACATTGAATAAACGGTATGATGAAGAAATTGCAAACAACACAACAAGGA&ACCGGGTGTTGGGAGTTCGAGTCTCTCCGCCCCTGCCAGAAATCATCCTTAGCGAAAGCTA	(((....((((...........(((......(((...(((...(.((((.(...((((((.....((.&.))..))))))).)))))..)))...))).......)))..........))))....))).	-17.2	No	Yes	No
1192560_1	rRNA	b2591	rrsG	2730500	2730538	-	CAACCTGGGAACTGCATCTGATACTGGCAAGCTTGAGT	antisense_protein_coding	antisense-b3596	antisense-b3596	3768198	3768215	-	AAAAGAGAAATAAAAAA	0	0	1	1	ATCTG&GAGAA	.(((.&.))).	-1.4	No	No	Yes
119277_1	protein_coding	b0177	bamA	200357	200394	+	TAAGTGTTCTCCACAAAGGAATGTAGTGGTAGTGTAG	5UTR	b0720	gltA	754607	754639	-	ATTCGTCATCAATGGATCCTTTACCTGCAAGC	2.32355e-18	3.37455e-18	1	1	CAAAGGAATGTAGTGGTA&CATCAATGGATCCTTTA	.(((((.((.((.((((.&.)))).)).))))))).	-8.2	Yes	No	No
1193388_1	ncRNA	b4444	omrA	2976102	2976174	-	TGGTGAGATTATTCGGTACGCTCTTCGTACCCTGTCTCTTGCACCAACCTGCGCGGATGCGCAGGTTTTTTT	rRNA	b3275	rrlD	3425858	3425924	-	TAGAGCACTGTTTCGGCAAGGGGGTCATCCCGACTTACCAACCCGATGCAAACTGCGAATACCGGA	0	0	2	1	ATTCGGTACGCTCTTCGTACCCTGTCTCTTGCACCAACCTGCGCGGATGCGCAGGTTTTT&TAGAGCACTGTTTCGGCAAGGGGGTCATCCCGACTTACCAACCCGATGCAAACTGCGAATACCGGA	.((((((((((..((.(((....(((...((.(((..(((((.((((...(((((((((.&.))))).))))))))))).)).)))))....)))............))).))..)))..)))))))	-32	Yes	No	Yes
1193408_1	protein_coding	b1540	rspR	1628583	1628613	+	TTTCCATGGCCCAGGTGCGCAACGGCAGTT	rRNA	b4010	rrfE	4213097	4213130	+	ACGCCGTAGCGCCGATGGTAGTGTGGGGTCTCC	3.80246e-12	5.66332e-12	1	1	TTTCCATGGCCCAGGTGCGCAACGGCA&CGCCGTAGCGCCGATGGTAGTGTGGGGT	.(((((((..(((...((((.(((((.&.))))).))))...)))...))))))).	-26.4	No	Yes	No
1193494_1	rRNA	b0204	rrlH	226618	226674	+	AGAGCACTGTTTCGGCAAGGGGGTCATCCCGACTTACCAACCCGATGCAAACTGCG	tRNA	b3799	proM	3982792	3982843	+	AATCCTCTCTCGCCGACCAATTTTGAACCCCGCTTCGGCGGGGTTTTTTGT	0	0	1	1	AGAGCACTGTTTCGGCAAGGGGGT&CCTCTCTCGCCGACCAATTTTGAACCCCGCTTCGGCGGGGTTTTT	(((((.((((((((((.((((((.&.)))))).)))))....................))))).))))).	-20.4	Yes	No	No
119425_19	antisense_protein_coding	antisense-b3806	antisense-b3806	3993478	3993513	-	GTAGAAGCGACTGACGTCACGTACCAGCTCCTCTT	protein_coding	b4484	cpxP	4106237	4106279	+	TGGAGCAGTTGCGTGACGTGACGCAATGGCAAAAAAGTTCAT	0.0331778	0.0393302	2	1	GTAGAAGCGACTGACGTCACGTACCAGCTCCT&TGGAGCAGTTGCGTGACGTGACGCAATGGCA	((....(((..(.((((((((((.(.(((((.&.))))).).)))))))))).))))....)).	-30.8	No	No	Yes
1194704_1	5UTR	b1838	pphA	1923120	1923155	-	CCAAGAGCCATTTCCCTGGACCGAATACAGGAATC	antisense_protein_coding	antisense-b4186	antisense-b4186	4413117	4413134	-	CGACTCTCATCCCAATA	0	0	1	1	AAGAGC&ACTCTC	.((((.&.)))).	-3.8	No	No	Yes
1194710_1	ncRNA	b4691	sroH	4190318	4190381	-	GCGTTCTGAATACCAGAGATAATTCTCTGGCGAAACCCACCTTAAGGTGGGTTTTGTTATTTT	protein_coding	b4016	aceK	4218803	4218866	+	ACGGCCAAAGTACGGACGCGGCATTTTTACTACGTGTTAAAGAGCATTACACCCGGCTGTTGC	0	0	1	1	CGTTCTGAATACCAGAGATAATTCTCTGGCGAAACCCACCTTAAGGTGGG&ACGGCCAAAGTACGGACGCGGCATTTTTACTACGTGTTAAAGAGCA	.(((((.(((((...((.(((.....(.(((...((...(((..(((.(.&.).))).)))...)).))).).....)))))..)))))..))))).	-19.5	No	No	Yes
119525_20	tRNA	b0202	ileV	225381	225442	+	GGCTTGTAGCTCAGGTGGTTAGAGCGCACCCCTGATAAGGGTGAGGTCGGTGGTTCAAGTC	rRNA	b3278	rrsD	3428372	3428414	-	AGGCAGCAGTGGGGAATATTGCACAATGGGCGCAAGCCTGAT	1.15281e-113	2.59736e-113	1	1	GGCTTGTAGCTCAGGTGGTTAGAGCGCACCCCTGA&GCAGCAGTGGGGAATATTGCACAATGGGCGCAAGCCT	(((((((.(((((.(((.......(.(((..(((.&.)))..))).)........)))..)))))))))))).	-30	No	Yes	No
119550_15	5UTR	b0440	hupB	461348	461408	+	ATTAAGGGGTGTTGTAAGGGGATGGCTGGCCTGATATAACTGCTGCGCGTTCGTACCTTG	protein_coding	b3608	gpsA	3782616	3782670	-	CACGCAAGGACGAGCGCAGCAGCCACTAACCCCAGGGAACCTTTGTTACCGCTA	3.17684e-283	8.96996e-283	2	1	AAGGGGTGTTGTAAGGGGATGGCTGGCCTGATATAACTGCTGCGCGTTCGTACCTTG&GCAAGGACGAGCGCAGCAGCCACTAACCCCAGGGAACCTTTGTTACCGCTA	.((.((((...((((((.....((((..........(((((((((..((((.(((((&.)))))))))))))))))).........))))....)))))).)))).)).	-46	Yes	No	No
1195755_1	rRNA	b3275	rrlD	3424104	3424126	-	CGAGAGGACCGGAGTGGACGCA	ncRNA	b4452	gadY	3664905	3664954	+	ACGGTTTATTAGTCTGGAGACGGCAGACTATCCTCTTCCCGGTCCCCTA	0	0	2	1	GAGAGGACCGGAGTGGAC&ATCCTCTTCCCGGTCCCCTA	.((.(((((((((.(((.&.))).))..))))))).)).	-19.9	No	No	Yes
1196111_1	protein_coding	b3210	arcB	3350691	3350753	-	AAGAAGAGTGGCGTCACGACGTAGAAGTGCTGAAAGCGTGGGTGGCAAAAGCCACTAAAAAA	protein_coding	b4208	cycA	4429844	4429916	+	GGTACAGGAAGAAAAAAACATGGTAGATCAGGTAAAAGTCGTTGCCGATGATCAGGCTCCGGCTGAACAGTC	0	0	1	1	AGAGTGGCGTCACGACGTAGAAGTGCTGAAAGCGTGGGTGGCAAAAGCCA&AGGAAGAAAAAAACATGGTAGATCAGGTAAAAGTCGTTGCCGATGATCAGGCTCC	.((((..((((.(((((........((((.(.((((..(........((.&.)).......)..)))).)...))))........)))))..)))).....)))).	-22.5	No	Yes	No
1196138_1	ncRNA	b4704	arrS	3657983	3658054	-	GTAATCCGATTTAAATATCGAGTCTCCTTGTTTCGACTTAAGCTGGCAATTGGATTGCCAGCTTTCTTTTA	rRNA	b3758	rrlC	3944564	3944626	+	GAGCACTGTTTCGGCAAGGGGGTCATCCCGACTTACCAACCCGATGCAAACTGCGAATACCG	0	0	3	1	GTAATCCGATTTAAATATCGAGTCTCCTTGTTTCGACTTAAGCTG&GAGCACTGTTTCGGCAAGGGGGTCATCCCGACTTACCAACCCGATGCAAACTGCGAATACC	(((.((((.(((...(((((.(((((((((((..(((....(((.&.)))...)))..))))))))).................)).))))).))).)).)).))).	-20.4	Yes	Yes	Yes
1196294_1	ncRNA	b4443	gcvB	2942764	2942836	+	ATGTTGTGTTGTTGTGTTTGCAATTGGTCTGCGATTCAGACCATGGTAGCAAAGCTACCTTTTTTCACTTCC	ncRNA	b4691	sroH	4190395	4190451	-	AGCAGACTGAAGAAATTCAGACATCCCGCAACCTGCGATTATCGCAAGGTCAAGGC	0	0	1	1	TGTTGTGTTGTTGTGTTTGCAATTGGTCTGCG&AGCAGACTGAAGAAATTCAGACATCCCGCAACCTGCGATT	.((((((((((.(((((((.(((((((((((.&.))))))).....)))))))))))...)))))..))))).	-25.1	Yes	No	No
1196394_1	ncRNA	b4704	arrS	3657983	3658054	-	GTAATCCGATTTAAATATCGAGTCTCCTTGTTTCGACTTAAGCTGGCAATTGGATTGCCAGCTTTCTTTTA	rRNA	b3758	rrlC	3944662	3944725	+	ACGTCCGTCGTGAAGAGGGAAACAACCCAGACCGCCAGCTAAGGTCCCAAAGTCATGGTTAAG	0	0	1	1	TCCTTGTTTCGACTTAAGCTGGCAATTGGATTGCCAGCTTTCTTTT&TGAAGAGGGAAACAACCCAGACCGCCAGCTAAGGTCCCAAAGTCATGGT	.((.(((((.(((((.(((((((..((((.(((....((((((((.&.))))))))...))).))))...))))))).)))))...))).)).)).	-32.7	No	No	Yes
119665_20,23770_189	protein_coding	b2959	yggL	3101775	3101877	-	GTAAGTGGCTGGAAGAGCGCAAACTGGATGAGGTACGCACCAGCGAACTTTTCGACGTTTGGTGGGACTAAGAAAGCATACGGGCGATGACAAATGCAAAAC	inter	int-4474	int-4474	4478891	4478909	-	GCCTGATGCGCTACGCTT	8.23103e-19	1.19943e-18	13	2	CAGCGAACTTTTCGACGTTTGGTGGGACTAAGAAAGCATACGGGCG&GCCTGATGCGCTACGCTT	.((((..............((((............((((.(((((.&))))))))))))))))).	-15.2	Yes	Yes	Yes
11967_298,643861_4	5UTR	b0655	gltI	687828	687876	-	AATTTCCCCGCTTATTCGCACCTTCCCTAACAGGCACAACACTGCACA	5UTR	b3505	insH1_11	3653212	3653240	-	TGTCACCTAAGGAAGGTGCGAACAAGTC	0.000140587	0.000172727	7	2	CGCTTATTCGCACCTTCCCTAACAGGCAC&TGTCACCTAAGGAAGGTGCGAACAAGTC	.((((.((((((((((((.((...((((.&))))...)).)))))))))))).)))).	-28.5	No	Yes	Yes
11980_336	tRNA	b0971	serT	1031625	1031644	-	GAATCTCTGCGCTTCCGCC	protein_coding	b3708	tnaA	3889013	3889056	+	CACCATTCCGACTCACCAGGGCCGTGGCGCAGAGCAAATCTAT	3.21521e-08	4.19876e-08	19	1	TCTCTGCGCTTCCGCC&GGGCCGTGGCGCAGAGC	.(((((((((.(.(((&.))).).))))))))).	-21.9	No	Yes	No
1198211_1	antisense_protein_coding	antisense-b2976	antisense-b2976	3122833	3122850	+	GCCATCGGCGGCGGTGT	rRNA	b3275	rrlD	3424282	3424309	-	CATATCGACGGCGGTGTTTGGCACCTC	0	0	1	1	GCCATCGGCGGCGGTGT&CATATCGACGGCGGTGTTTGGCA	(((((((.((.((((((&.)))))).)).)))....)))).	-17.4	No	No	Yes
1198261_1	ncRNA	b4698	mgrR	1622832	1622851	-	AAGCATTCACCGCCGGTTT	rRNA	b2589	rrlG	2726653	2726708	-	TATCGACGGCGGTGTTTGGCACCTCGATGTCGGCTCATCACATCCTGGGGCTGAA	0	0	1	1	AGCATTCACCGCCGG&ACGGCGGTGTTTGGCA	.((...((((((((.&.))))))))....)).	-20.2	No	Yes	No
1199262_1	ncRNA	b4444	omrA	2976142	2976186	-	AGAGGTATTGATTGGTGAGATTATTCGGTACGCTCTTCGTACCC	inter	int-1770	int-1770	3663805	3663854	-	ACCTGCTTCATGTGAAACTCTTCCCTGATGATTTCTGCCGGGCTACCGG	0	0	1	1	AGGTATTGATTGGTGAGATTATTCGGTACGCTCTTCG&TGAAACTCTTCCCTGATGATTTCTGCCGGGCTACCG	.((((....((((((((((((((.((.......(((.&.))).......)).))))))))).)))))..)))).	-19.2	No	Yes	No
119983_3	pseudogene	b0553-1	b0553-1	576633	576654	-	TATGCCCGTCTTGGCTTCAAA	antisense_protein_coding	antisense-b2776	antisense-b2776	2902252	2902269	-	AAAGAGGTGACATATGC	0	0	1	1	CGTCTTGGCTTCA&AGAGGTGACA	.(((...(((((.&.)))))))).	-7.4	No	Yes	No
1200220_1	5UTR	b0889	lrp	932547	932588	+	TTCAGGGTCAGACAGGAGTAGGGAAGGAATACAGAGAGACA	rRNA	b4009	rrlE	4210467	4210490	+	CTAAATACTCCTGACTGACCGAT	1.62522e-74	3.30102e-74	1	1	GGGTCAGACAGGAGTAG&ATACTCCTGACTGACCG	.((((((.((((((((.&.)))))))).)))))).	-24.6	No	Yes	No
1200560_1	antisense_protein_coding	antisense-b0693	antisense-b0693	718454	718471	+	GGAACAACACACAGCAC	rRNA	b3851	rrsA	4036747	4036810	+	CAGGGCTACACACGTGCTACAATGGCGCATACAAAGAGAAGCGACCTCGCGAGAGCAAGCGGA	0	0	1	1	CAGCAC&CGTGCTA	.(((((&.))))).	-6.3	No	No	Yes
1200898_1	protein_coding	b0478	ybaL	502125	502152	-	CAGGCCGGACAAAACCTGGTACTGGCA	ncRNA	b4438	cyaR	2167140	2167157	+	AGCTGTACCAGGAACCA	3.30322e-24	5.41755e-24	1	1	ACCTGGTACTGGCA&AGCTGTACCAGGA	.((((((((.(((.&.))))))))))).	-18.1	Yes	No	No
120104_15	ncRNA	b4698	mgrR	1622835	1622869	-	ACACAAATCTATCCATGCAAGCATTCACCGCCGG	tRNA	b2397	alaW	2518191	2518228	-	GCTATAGCTCAGCTGGGAGAGCGCTTGCATGGCATGC	0	0	2	1	CTATCCATGCAAGCATTCACCGCC&AGCTGGGAGAGCGCTTGCATGGCATGC	.(((((((((((((.(((.((((.&.)).))..))).)))))))))).))).	-25.3	Yes	No	No
120136_9	protein_coding	b1625	cnu	1704906	1704950	+	TAATACCTACCCCTTTGGTATTAATTATTTTATGGACCTTTTAT	5UTR	b3231	rplM	3378730	3378753	-	TATTCGAAGGGGTAGGTTTGCCG	1.53529e-137	3.61768e-137	3	1	TACCTACCCCTTTGGT&TTCGAAGGGGTAGGTT	.((((((((((((((.&.)))))))))))))).	-24.2	Yes	No	No
120155_20	5UTR	b1480	sra	1555998	1556021	-	TGTTTCTTCGCTACGGCGATGTT	protein_coding	b2094	gatA	2174994	2175023	-	AATTTCTTTTGTCGATCGTAGCGAAGTTT	2.47907e-212	6.48726e-212	2	1	TCTTCGCTACGGCGATG&TGTCGATCGTAGCGAAGT	.(((((((((((((((.&.)))).))))))))))).	-22.5	No	Yes	No
1201788_1	protein_coding	b1260	trpA	1316409	1316436	-	AAAGCGGCGACGCGCAGTTAATCCCAC	antisense_protein_coding	antisense-b1610	antisense-b1610	1684436	1684471	-	CAACGCCAGCGACTGCGCGTCGTTGCCGAGATGTT	0	0	1	1	AGCGGCGACGCGCAGTTA&CGACTGCGCGTCGTTGCC	.((((((((((((((((.&.)))))))))))))))).	-31.3	No	Yes	No
1202062_1	protein_coding	b0177	bamA	199950	199978	+	TCCCGCATCAGGCCAGTAATTATGATCC	rRNA	b3756	rrsC	3941925	3941957	+	AATGTCTGGGAAACTGCCTGATGGAGGGGGAT	1.76244e-17	2.75564e-17	1	1	TCCCGCATCAGGCCAGTAATTATGATC&TGTCTGGGAAACTGCCTGATGGAGGGGG	((((.(((((((.((((......(((.&.)))......)))))))))))..)))).	-23.2	No	Yes	No
1202448_1	ncRNA	b4445	omrB	2976342	2976385	-	CCCAGAGGTATTGATAGGTGAAGTCAACTTCGGGTTGAGCACA	inter	int-1765-1	int-1765-1	3654631	3654665	+	TTACCTTTGGCAAACTGATTATAAAGTTAATGTC	0	0	1	1	CCCAGAGGTAT&TTACCTTTGGC	.(((((((((.&.))))))))).	-13.1	No	No	Yes
1202694_1	3UTR	b3472	dcrB	3610511	3610565	+	AGTTTTAAGATGATGAGGCGGCCTCAGGGACGTGTTCCGGAGGCCGTTTTTTTA	inter	int-1767	int-1767	3657985	3658055	-	TGTAATCCGATTTAAATATCGAGTCTCCTTGTTTCGACTTAAGCTGGCAATTGGATTGCCAGCTTTCTTT	0	0	1	1	TAAGATGATGAGGCGGCCTCAGGGACGTGTTCCGGAGGCCGT&TCGAGTCTCCTTGTTTCGACTTAAGCTGGCAATTGGATTGCCAGCTTTCTTT	.((((......(((((((((((((.((......((((((((.&.)).))))))......)).))....)))).....)).))))).....)))).	-21.7	No	Yes	No
1202900_1	protein_coding	b4679	yohP	2228975	2229042	+	ACGCCAATGAAAATTATACTCTGGGCTGTATTGATTATTTTCCTGATTGGGCTACTGGTGGTGACTG	ncRNA	b4445	omrB	2976358	2976385	-	CCCAGAGGTATTGATAGGTGAAGTCAA	0	0	1	1	ACGCCAATGAAAATTATACTCTGGGC&CCCAGAGGTATTGATAGGTGA	.((((.((.((...(((.(((((((.&)))))))))))).)).)))).	-17.6	No	No	Yes
1203093_1,318188_1	ncRNA	b4445	omrB	2976347	2976385	-	CCCAGAGGTATTGATAGGTGAAGTCAACTTCGGGTTGA	antisense_ncRNA	antisense-b4452	antisense-b4452	3664893	3664936	-	ATAGTCTGCCGTCTCCAGACTAATAAACCGTTATAACACTCCC	0	0	1	2	AGAGGTATTGATAGGTGAAGTCAACTTCGGGTTGA&GTCTGCCGTCTCCAGACTAATAAACCGTTATAACACTCC	.(((((..((((.(((..((((.......(((.((&.)).))).......)))).....)))))))..)).))).	-14.9	No	No	Yes
1203181_1	5UTR	b1838	pphA	1923123	1923153	-	AAGAGCCATTTCCCTGGACCGAATACAGGA	protein_coding	b3022	mqsR	3168536	3168559	-	AGGGAGGCGGGGGTTATGGAAAA	0	0	1	1	GCCATTTCCCTGGACCG&AGGCGGGGGTTATGGA	.((((..((((.(.((.&.))).))))..)))).	-17.8	Yes	No	No
1203188_1	rRNA	b0201	rrsH	224830	224884	+	GTCGTCAGCTCGTGTTGTGAAATGTTGGGTTAAGTCCCGCAACGAGCGCAACCC	ncRNA	b4445	omrB	2976361	2976385	-	CCCAGAGGTATTGATAGGTGAAGT	0	0	1	1	GTCAGCTCGTGTTGTGAAATGTTGGGT&CCCAGAGGTATTGATAGGTGAA	.(((.((...((((.......(((((.&)))))......)))))).))).	-8.9	No	No	Yes
1203206_1	ncRNA	b4445	omrB	2976361	2976386	-	TCCCAGAGGTATTGATAGGTGAAGT	protein_coding	b4257	yjgN	4479962	4479986	+	TCTTTTTTTTGTTTTTTTCTATTT	3.95545e-09	5.70001e-09	2	1	CAGAGGTATTGATAGGTGAAGT&TCTTTTTTTTGTTTTTTTCTA	.(((((....((((((.((((.&.))))..))))))..))))).	-5.2	No	No	Yes
12032_33	5UTR	b3783	rho	3966247	3966282	+	GTCGTCAGCTCGTGTTGTGAAATGTTGGGTTAAGTCCCGCAACGAGCGCAACCC	rRNA	b4009	rrlE	4212084	4212112	+	CCCAGAGGTATTGATAGGTGAAGT	1.11802e-98	2.43562e-98	1	1	GTCAGCTCGTGTTGTGAAATGTTGGGT&CCCAGAGGTATTGATAGGTGAA	.(((.((...((((.......(((((.&)))))......)))))).))).	-8.9	Yes	No	No
120337_20	5UTR	b2997	hybO	3146348	3146414	-	ACTAATGCTTCTTCCCTTCGTTTTAGCGCCCCGCCGCAGTATCATGATATCGATAACCATAATAAA	protein_coding	b3988	rpoC	4187390	4187425	+	AAGTTATCGATATCTGGGCTGCGGCGAACGATCGT	4.20208e-07	5.86836e-07	8	1	TTCGTTTTAGCGCCCCGCCGCAGTATCATGATATCGATAACC&AGTTATCGATATCTGGGCTGCGGCGAACGAT	.(((((.........(((((((((.(((.((((((((((((.&.))))))))))))))))))))))))))))).	-38.6	No	Yes	No
120357_3	ncRNA	b4439	micF	2313101	2313125	+	ATTTATTACCGTCATTCATTTCTG	antisense_protein_coding	antisense-b3215	antisense-b3215	3362756	3362773	-	GTGACATATTTATTACC	0	0	2	1	CGTCATT&GTGACA	.(((((.&))))).	-5.1	No	Yes	No
1203631_1	rRNA	b2589	rrlG	2728164	2728222	-	TCCGTCGTGAAGAGGGAAACAACCCAGACCGCCAGCTAAGGTCCCAAAGTCATGGTTA	rRNA	b4009	rrlE	4210930	4210974	+	CCGACTTACCAACCCGATGCAAACTGCGAATACCGGAGAATGTT	4.59995e-68	9.15233e-68	1	1	TCCGTCGTGAAGAGGGAAACAACCCAGACCGCCAGCTAAGGTCCCAAAGTCA&CGACTTACCAACCCGATGCAAACTGCGAATACCGGAG	(((((((((....(((.......................(((....(((((.&.))))))))..)))....).....))))....)))).	-12.6	No	No	Yes
120465_2	pseudogene	b4493-1	b4493-1	1490327	1490344	-	GGTGAAATGAAAACTAT	protein_coding	b1825	yebO	1908544	1908565	-	TACTCAGAGGTGGTGAAATGA	0.00334179	0.00395972	2	1	AACTAT&GGTGGTG	.(((((&.))))).	-3.1	No	Yes	No
1205138_1	5UTR	b1095	fabF	1151896	1151931	+	TTGTCCCACTAGAATCATTTTTTCCCTCCCTGGAG	ncRNA	b4611	sibE	3195097	3195117	-	CTTCTTCGGGAGGGGCTTTC	6.1531e-06	8.37638e-06	1	1	TTCCCTCCCTGGAG&TCTTCGGGAGGGGC	.((((((((.((((&.)))))))))))).	-18.9	No	Yes	No
120516_10	protein_coding	b2146	preT	2234113	2234143	+	TTATGTCACGACGCTCCCTGTAGTCAGGCT	ncRNA	b4452	gadY	3664864	3664908	+	CTGAGAGCACAAAGTTTCCCGTGCCAACAGGGAGTGTTATAACG	2.65857e-252	7.22919e-252	1	1	TGTCACGACGCTCCCTGTAGTCAGGCT&TGCCAACAGGGAGTGTTATAACG	.((...((((((((((((.....(((.&.))).))))))))))))...)).	-23.9	No	Yes	No
1205595_1	tRNA	b3276	alaU	3426958	3427025	-	AGCTCAGCTGGGAGAGCGCCTGCTTTGCACGCAGGAGGTCTGCGGTTCGATCCCGCATAGCTCCACC	tRNA	b3761	trpT	3946908	3946967	+	ACGCAGGGGGTCGCGGGTTCGAGTCCCGTCCGTTCCGCCACCCTAATTAGGGGCGTAGT	0	0	2	1	AGCGCCTGCTTTGCACGCAGGAGGTCTGCGGTTCGATCCCGCATAGCTCCA&GGGGGTCGCGGGTTCGAGTCCCGTCCGTTCCGCCACCCTAATTAGGGGCGTA	.((((((...(((...((.((((....(((((((((.(((((...(((((.&.))))).))))).)))))..))))...)))))).....)))....)))))).	-42.6	No	No	Yes
1205635_1	protein_coding	b2587	kgtP	2724472	2724509	-	CCGTGGTGGCGTTTCTGGTTTCTTTGATGCTACATCG	ncRNA	b4704	arrS	3657984	3658054	-	GTAATCCGATTTAAATATCGAGTCTCCTTGTTTCGACTTAAGCTGGCAATTGGATTGCCAGCTTTCTTTT	0	0	1	1	TGGTGGCGTTTCTGGTTTCTTTGATGCTACATCG&CCGATTTAAATATCGAGTCTCCTTGTTTCGACTTAAGCTGGCAATTGGATTGCCAGCT	.(.(((((..(((((((.((((((((.((.((((&.)))).))..)))))).......................)).))))))).))))).).	-15.9	No	No	Yes
1205649_1	ncRNA	b4443	gcvB	2942714	2942787	+	AAAGTTTTATCGGAATGCGTGTTCTGGTGAACTTTTGGCTTACGGTTGTGATGTTGTGTTGTTGTGTTTGCAA	protein_coding	b3709	tnaB	3891253	3891307	+	TCTTCCCGAACGGCTTTATTTACGGGATCGGCGGTGCCGGGCTGTGCGCCACCA	0	0	1	1	CTGGTGAACTTTTGGCTTACGGTTGTGATGTTGTGTTGTTGTGTTTGC&CCGAACGGCTTTATTTACGGGATCGGCGGTGCCGGGCTGTGCGCCAC	.(((((.((.((((((..((.((..((((.(((((......((((((.&.))))))........))))).)))))).))))))))..)).))))).	-27	No	Yes	No
120616_18	ncRNA	b4698	mgrR	1622833	1622860	-	TATCCATGCAAGCATTCACCGCCGGTT	protein_coding	b2832	ygdQ	2970399	2970437	+	TTTTTGGCAGGGCTTTTTAGATGTTATTTGCATGGATA	0	0	1	1	TATCCATGCAAGCATTCACCGCCGGT&TTTGGCAGGGCTTTTTAGATGTTATTTGCATGGATA	((((((((((((((((..(((((((.&.))))).))........)))))...)))))))))))	-23.4	No	Yes	No
1206230_1	5UTR	b0377	sbmA	396526	396575	+	AGCGCCTTGCTATGGGTCACAATGGGCGGTTTCATTTGGCTGACGCTTT	5UTR	b1838	pphA	1923105	1923154	-	CAAGAGCCATTTCCCTGGACCGAATACAGGAATCGTGTTCGGTCTCTTT	1.95525e-249	5.30712e-249	1	1	AGCGCCTTGCTATGGGTCACAATGGGCGGTTTCATTTGGCTG&GAGCCATTTCCCTGGACCGAATACAGGAATCGTGTTC	(((((((((.(((.((((.((..(((.......(..(((((.&.)))))..))))))))))..)))))))....))))).	-21.3	No	No	Yes
1206873_1	inter	int-1767	int-1767	3657983	3658055	-	TGTAATCCGATTTAAATATCGAGTCTCCTTGTTTCGACTTAAGCTGGCAATTGGATTGCCAGCTTTCTTTTA	3UTR	b3740	rsmG	3922874	3922903	-	TAGTGAAAATATCAGTCTGCTAAAAATCG	2.1978e-244	5.94181e-244	1	1	CTGGCAATTGGATTGCCAGCTT&TAGTGAAAATATCAGTCTGCTAA	.(((((((((((((....(((.&.)))...))).))))).))))).	-9.7	Yes	No	No
1206939_1	5UTR	b1838	pphA	1923104	1923154	-	CAAGAGCCATTTCCCTGGACCGAATACAGGAATCGTGTTCGGTCTCTTTT	5UTR	b2378	lpxP	2495526	2495599	+	TAGTCTTTACACTCTTTACAGGAACCATTGTCGTACATGATGGCCCAACCAATTGAGTGTACCGCTGTCGACA	5.34431e-20	8.49948e-20	1	1	AGAGCCATTTCCCTGGACCGAATACAGGAATCGTGTTCGGTCTC&TAGTCTTTACACTCTTTACAGGAACCATTGTCGTACATGATGGCCCA	.(.((((((......(((.........(((..((((..((.((.&.)).))..))))..)))............)))......)))))).).	-15.8	No	No	Yes
120719_1	protein_coding	b0604	dsbG	638290	638310	-	AATTTACGCACCAGCCGGAC	protein_coding	b3574	yiaJ	3741696	3741735	-	TTCTAATGAACTGGGATTTACTGTCAGGGATGACCTGGG	0.00280299	0.00333433	1	1	ACCAGCCGGAC&TGTCAGGGATGACCTGGG	.((((((.(((&.))).))......)))).	-8	No	No	Yes
120859_15	5UTR	b0654	gltJ	686724	686749	-	CTGAAAACCGCAATACGCTGGGTAA	5UTR	b0721	sdhC	754984	755039	+	CACCCAGCGTTGTAACGTGTCGTTTTCGCATCTGGAAGCAGTGTTTTGCATGACG	0	0	6	1	CTGAAAACCGCAATACGCTGGGTA&CACCCAGCGTTGTAACGTGTCGTTTTCGC	.(((((((.(((..(((((((((.&.))))))))).......))).))))))).	-23.6	Yes	No	No
1208730_1	protein_coding	b3212	gltB	3357925	3357942	+	CAGGTCGATGGCGGCCT	tRNA	b3799	proM	3982707	3982749	+	GAACTAAAAATTCAAAAAGCAGTATTTCGGCGAGTAGCGCAG	0.0216798	0.0260498	1	1	GGTCGATGGCGGCC&AGCAGTATTTCGGCG	.(((((..((.((.&.)).))...))))).	-9.5	No	Yes	No
1209022_1	protein_coding	b0177	bamA	200343	200405	+	TCGGTAAAACCTGGTAAGTGTTCTCCACAAAGGAATGTAGTGGTAGTGTAGCGATGACTTTA	rRNA	b3272	rrfF	3423422	3423482	-	GCCGTAGCGCCGATGGTAGTGTGGGGTCTCCCCATGCGAGAGTAGGGAACTGCCAGACAT	7.68646e-194	1.96481e-193	1	1	CGGTAAAACCTGGTAAGTGTTCTCCACAAAGGAATGTAGTGGTAGTGTA&GCCGTAGCGCCGATGGTAGTGTGGGGTCTCCCCATGCGAGAGTAGGGAACTGCCA	.((((...((((.(..((((.(((((((.....((...(((.((..((.&))..)).)))..)).....))))))).......))))...).))))....)))).	-23.5	No	Yes	No
1209832_1	5UTR	b1838	pphA	1923104	1923154	-	CAAGAGCCATTTCCCTGGACCGAATACAGGAATCGTGTTCGGTCTCTTTT	rRNA	b4009	rrlE	4211515	4211558	+	TGTAGGCTGGTTTTCCAGGCAAATCCGGAAAATCAAGGCTGAG	0	0	1	1	GAGCCATTTCCCTGGACCGAATACAG&TGTAGGCTGGTTTTCCAGGCAAATCCGGAAAATCAAGGCTG	.((((((((.(((((((((..((((.&))))..).))...)))))).))))............)))).	-19.3	No	No	Yes
121008_18	5UTR	b0819	ldtB	855749	855775	-	ATGGCCTGCCAGGCACAAAATCTCGC	rRNA	b3970	rrlB	4170851	4170881	+	ATCCGGGTTGCGGACAGTGTCTGGTGGGTA	4.60501e-14	6.99324e-14	2	1	GGCCTGCCAGGCACAAAATCTCGC&TGCGGACAGTGTCTGGTGGGTA	.(((((((((((((....((.(((&.)))))..))))))))))))).	-26.2	No	Yes	No
1210214_1	tRNA	b0206	aspU	228898	228962	+	TAAAACCGGTGGTTGTAAAAGAATTCGGTGGAGCGGTAGTTCAGTCGGTTAGAATACCTGCCTG	protein_coding	b3516	gadX	3665399	3665460	-	AATCTTTGCGTTGTTATCTGTTTTTCTTGAGGATGAGCACTTTATACCGCTGCTTCTGAAC	0	0	1	1	ATTCGGTGGAGCGGTAGTTCAGTCGGTTAGAAT&TTTCTTGAGGATGAGCACTTTATACCGCTGCTTCTGAAC	.(((((.((((((((((((((.((....((((.&.))))....)))))))......))))))).)).))))).	-24.2	Yes	No	No
1211276_1	5UTR	b1838	pphA	1923104	1923154	-	CAAGAGCCATTTCCCTGGACCGAATACAGGAATCGTGTTCGGTCTCTTTT	ncRNA	b4452	gadY	3664896	3664970	+	AGTGTTATAACGGTTTATTAGTCTGGAGACGGCAGACTATCCTCTTCCCGGTCCCCTATGCCGGGTTTTTTTTA	0	0	1	1	CAAGAGCCATTTCCCTGGACCGAATACAGGAATCGTGTTCGGTCTCTT&TGGAGACGGCAGACTATCCTCTTCCCGGTCCCCTATGCCGGGTTTTTT	.(((((((........((((((.....((((...((.(.(.((((((.&.)))))).).).))..)))).....)))))).........))))))).	-31.5	No	No	Yes
121150_1	5UTR	b0628	lipA	660280	660299	-	TAATTCAAAAATAGTTGAT	antisense_protein_coding	antisense-b1025	antisense-b1025	1092886	1092912	-	ATACAGTACTACTAATTCTCAAATAG	0	0	1	1	GTTGAT&CTCAAA	.((((.&.)))).	-1.9	Yes	No	No
1211628_1	tRNA	b0664	glnX	696451	696504	-	TGGGGTATCGCCAAGCGGTAAGGCACCGGATTCTGATTCCGGCATTCCGAGGT	3UTR	b2167	fruA	2259586	2259651	-	GGTTTGTGAATGTAATTTTATGAATTTAAATGGTTTTATCTTTCAGTAGAAACTTCAAACGTTCA	1.41105e-80	2.91733e-80	1	1	TGGGGTATCGCCAAGCGGTAAGGCACCGGATTCTGATTCCGGCATTCCGAGG&GTTTGTGAATGTAATTTTATGAATTTAAATGGTTTTATCTTTCAGTAGAAACTTCAA	((((((.((((..((.((((((((...((((((........((((((((((.&.)))).))))))........)))))).....)))))))).))..)).)).)))))).	-24.6	No	Yes	No
121198_2	rRNA	b4007	rrsE	4208821	4208840	+	ATTCCAGGTGTAGCGGTGA	3UTR	MalH	malG	4242572	4242604	-	ATGCCGCTGCACCCTCAACTTACGTTATCCCA	2.70332e-28	4.16138e-28	3	1	AGGTGTAGCGGTG&TGCCGCTGCACCC	.(((((((((((.&.))))))))))).	-22	No	Yes	No
1212179_1	protein_coding	b0953	rmf	1015858	1015926	+	GCGGACAGGGTAGTAATGGCCTGATTCTGTCTCTTTAAAAAGAAACCTCCGCATTGCGGAGGTTTCGC	protein_coding	b1243	oppA	1301158	1301267	+	ATAATGAGGGAGTCCAAAAAACAATGACCAACATCACCAAGAGAAGTTTAGTAGCAGCTGGCGTTCTGGCTGCGCTAATGGCAGGGAATGTCGCGCTGGCAGCTGATGT	0	0	2	1	GCGGACAGGGTAGTAATGGCCTGATTCTGTCTCTTTAAAAAGAAACCTCCGCATTGCGGAGGTTTCGC&AGGGAGTCCAAAAAACAATGACCAACATCACCAAGAGAAGTTTAGTAGCAGCTGGCGTTCTGGCTGCGCTAATGGCAGGGAATGTCGCGCT	((((((((.(((((((((.((((...(((((((((......((........(((((....((.(((.(&.).))).))......))))).......))...))))))....)))...)))..).))))...))))).)).............))).))).	-28.5	Yes	No	Yes
1212232_1	ncRNA	b4432	ryeA	1923082	1923156	+	TGCTTCTGGCTTTTAACAGATAAAAAGAGACCGAACACGATTCCTGTATTCGGTCCAGGGAAATGGCTCTTGGG	tRNA	b1977	asnT	2044549	2044624	+	CCTCTGTAGTTCAGTCGGTAGAACGGCGGACTGTTAATCCGTATGTCACTGGTTCGAGTCCAGTCAGAGGAGCCA	0	0	2	1	GCTTCTGGCTTTTAACAGATAAAAAGAGACCGAACACGATTCCTGTATTCGGTCCAGGGAAATGGCTC&CAGTCGGTAGAACGGCGGACTGTTAATCCGTATGTCACTGGTTCGAGTCCAGTCAGAGGA	.(((((((((...............(.((((((((..(((...((.(((((((((.(.....(((((.&.)))))......)...))))))..))).))...)))....))))).))))))))))))).	-30.5	No	Yes	No
1212275_1	protein_coding	b1532	marB	1620088	1620150	+	ATGTCGTGGTTGTTCCCCCATCGCAGGAACACCCACCGTTTGATTTAAATCACATGGGTACT	ncRNA	b4432	ryeA	1923092	1923154	+	TTTTAACAGATAAAAAGAGACCGAACACGATTCCTGTATTCGGTCCAGGGAAATGGCTCTTG	8.00738e-118	1.82273e-117	1	1	TGTCGTGGTTGTTCCCCCATCGCAGGAACACCCACCGTTTGATTTAAATCA&AGATAAAAAGAGACCGAACACGATTCCTGTATTCGGTCCAGGGAAATGGCT	.(((((.....((((((((..(((((((.......((.((..(((..(((.&.)))..)))..)).)).......)))))))..).))....)))))))))).	-21.1	No	Yes	No
1212477_1	rRNA	b3756	rrsC	3942002	3942047	+	AAGAGGGGGACCTTCGGGCCTCTTGCCATCAGATGTGCCCAGATG	rRNA	b3968	rrsB	4166778	4166810	+	TGTCTGGGAAACTGCCTGATGGAGGGGGATAA	4.25476e-67	8.43645e-67	2	1	GCCTCTTGCCATCAGATGTGCCCAGATG&TGTCTGGGAAACTGCCTGATGGAGGGGGA	.((((((.(((((((..((.(((((((.&.)))))))..))...))))))))))))).	-31.4	No	Yes	No
1212479_1	protein_coding	b1737	chbC	1821163	1821208	-	AATGTTATTGCATCGCTTGAAAAGGTACTCCTCCCTTTTGCAGTT	protein_coding	b3358	yhfK	3488224	3488292	+	TTGTGGTTGAACGGCGAGCAATACATCCTTCCGCGTCTTATCGATACCATTATTGGTTGTTTAATTGC	3.90554e-21	6.27243e-21	1	1	AATGTTATTGCATCGCTTGAAAAGGTACT&TGTGGTTGAACGGCGAGCAATACATC	.(((.((((((.(((((.....((.(((.&.))).))....)))))))))))))).	-17.4	No	Yes	No
121292_9	protein_coding	b1644	ydhJ	1721322	1721345	+	TGCCGGATGGTGGCTGTGGAATT	3UTR	b4484	cpxP	4106331	4106369	+	TTCCTTGCCATAGACACCATCCCTGTCTTCCCCCACAT	1.24422e-24	2.04419e-24	1	1	CGGATGGTGGCTGTGGA&GCCATAGACACCATCCC	.((((((((.((((((.&.)))))).)))))))).	-24.2	Yes	No	No
1212968_1	5UTR	b1419	ydcA	1491582	1491601	+	ATTCACCCGATCTTTGATC	antisense_protein_coding	antisense-b4303	antisense-b4303	4528074	4528112	+	TCTTTGCCGGGGATAAGCGCTCTGCTTATCCCCATCTT	1.48596e-22	2.41441e-22	1	1	TTCACCCGA&CCGGGGAT	.((.((((.&.)))))).	-8.6	No	Yes	No
1213323_1	ncRNA	b4585	chiX	507216	507288	+	AAGTGACGGCATAATAATAAAAAAATGAAATTCCTCTTTGACGGGCCAATAGCGATATTGGCCATTTTTTTA	rRNA	b4009	rrlE	4210903	4210975	+	GAGCACTGTTTCGGCAAGGGGGTCATCCCGACTTACCAACCCGATGCAAACTGCGAATACCGGAGAATGTTA	0	0	2	1	AAGTGACGGCATAATAATAAAAAAATGAAATTCCTCTTTGACGGGCCAATAGCG&AGCACTGTTTCGGCAAGGGGGTCATCCCGACTTACCAACCCGATGCAAACTG	.(((....((((.............((..((.((((((((.((((.((...((.&.))..)).)))).))))))))..))..)).............))))..))).	-19	No	Yes	No
1214406_1	tRNA	b1984	asnW	2058059	2058086	-	CGGTAGAACGGCGGACTGTTAATCCGT	protein_coding	b4016	aceK	4218583	4218655	+	TGAGGGCGCTAAATGCCGCGTGGCCTGGAATTATTGATTGCTCAAACCATTTTGCAAGGCTTCGATGCTCAG	0	0	1	1	CGGTAGAACGGCGGACTGTTAATCCG&AGGGCGCTAAATGCCGCGTGGCCT	.(((....(((((....((...(((.&.))).))....)))))....))).	-15	No	No	Yes
1214442_1	tRNA	b1984	asnW	2058047	2058086	-	CGGTAGAACGGCGGACTGTTAATCCGTATGTCACTGGTT	protein_coding	b2820	recB	2955658	2955726	-	ACAATCCACTGTACGAACGCCTGCTGGAAGAGATCGACGATAAAGCGCAAGCCGCGCAGTGGTTGTTG	1.4395e-46	2.66094e-46	1	1	CGGTAGAACGGCGGACTGTTAATCCGTATGTCACTGGT&TCCACTGTACGAACGCCTGCTGGAAGAGATCGA	((((....((((((..((((....((((...((.(((.&.))).)))))))))).))))))......)))).	-16	No	No	Yes
121471_9	protein_coding	b0128	yadH	144450	144512	+	TGGACGTGGTTTGCGTAGCTAAGGCTATTTCCTCTCCTCTGGATTTGGGGGAGAGGAGTTTT	protein_coding	b3342	rpsL	3474513	3474542	-	TTAACCAGCTGGTACGCAAACCACGTGCT	0.0105265	0.0129235	2	1	TGGACGTGGTTTGCGTAGCTAAGGCTA&CAGCTGGTACGCAAACCACGTGCT	.(.((((((((((((((.(...((((.&.))))).)))))))))))))).).	-31.7	Yes	No	No
1215049_1	protein_coding	b0721	sdhC	755263	755287	+	CATCGCGTTTCCGGTGTGATCACC	ncRNA	b1954	dsrA	2025243	2025264	-	AAGCAAGTTTCATCCCGACCC	0	0	2	1	CCGGTGTGAT&TTCATCCCGA	.(((.((((.&.)))).))).	-8.1	No	No	Yes
121522_2	rRNA	b0201	rrsH	224640	224657	+	TAAGTCGACCGCCTGGG	protein_coding	b1015	putP	1079409	1079438	+	ATTCTGGGCGGTCGTAGTCTTGGGCCATT	0.00232262	0.00277488	2	1	TCGACCGCCTGGG&TCTGGGCGGTCGT	.(((((((((((.&.))))))))))).	-21.4	No	No	Yes
121525_2	protein_coding	b1015	putP	1079409	1079438	+	ATTCTGGGCGGTCGTAGTCTTGGGCCATT	rRNA	b3851	rrsA	4036400	4036417	+	TAAGTCGACCGCCTGGG	0.000563706	0.000685081	1	1	TCTGGGCGGTCGT&TCGACCGCCTGGG	.(((((((((((.&.))))))))))).	-21.4	No	No	Yes
1215314_1	protein_coding	b1128	roxA	1187807	1187825	-	GTCGTCGCTGGCGAGTGG	protein_coding	b4359	opgB	4599291	4599316	-	TATCACCCTGTTTGCCAGCGACTAT	0.0201125	0.0242403	1	1	CGTCGCTGGCGAGTGG&CCCTGTTTGCCAGCGACT	.((((((((((((.((&.))..)))))))))))).	-23.3	Yes	No	No
121584_2,1319356_1	rRNA	b3756	rrsC	3943333	3943383	+	TTGGATCACCTCCTTACCTTAAAGAAGCGTTCTTTGCAGTGCTCACACAG	inter	int-2044-1	int-2044-1	4208031	4208078	+	TGTGGGCACTCGAAGATACGGATTCTTAACGTCGCAAGACGAAAAAT	2.97621e-83	5.77893e-83	31	2	AAAGAAGCGTTCTTTGCAGTGCTCACAC&TGTGGGCACTCGAAGATACGGATTCTTA	.(((((.(((((((((.((((((((((.&)))))))))))))))).)))..))))).	-29	Yes	Yes	No
121587_20	protein_coding	b1159	mcrA	1210369	1210455	+	ATTGAACTGAAAGCTGAGTGTTCGATAGGTGAAGAGGATGGTGTTTATGGTCTAATCCTTGAGTCGTGGGGGCCGGGTGACAGAAA	protein_coding	b4139	aspA	4366920	4366951	-	ACAGAATCTGATGCACCCGGCTTACAAAGCA	6.16968e-29	1.04099e-28	3	1	AGTCGTGGGGGCCGGGTGACAGAA&ATCTGATGCACCCGGCTTACAAAGCA	.((..((..(((((((((.((((.&.))))...)))))))))..))..)).	-26.4	No	No	Yes
121590_2,404306_3	3UTR	b3850	hemG	4035415	4035471	+	TGTGGGCACTCGAAGATACGGATTCTTAACGTCGCAAGACGAAAAATGAATACCAA	rRNA	b4007	rrsE	4209672	4209723	+	TTGGATCACCTCCTTACCTTAAAGAAGCGTTCTTTGCAGTGCTCACACAGA	1.01949e-89	2.01703e-89	24	2	TGTGGGCACTCGAAGATACGGATTCTTAACGTCGCAAGACGAAAAATGAATACCAA&TTGGATCACCTCCTTACCTTAAAGAAGCGTTCTTTGCAGTGCTCACAC	((((((((((((((((.(((..(((((((.((...(((..((....(((...(((.&.))).)))..))))))).)))).))).))))))))).)))))))))).	-29.1	Yes	Yes	No
121593_2	3UTR	b2592	clpB	2731222	2731273	-	GTGTGGGCACTCGAAGATACGGATTCTTAACGTCGCAAGACGAAAAATGAA	rRNA	b3851	rrsA	4037066	4037106	+	TCCTTACCTTAAAGAAGCGTTCTTTGAAGTGCTCACACAG	4.87788e-100	9.94274e-100	38	1	GTGTGGGCACTCGAAGATACGGATTCTTA&AAAGAAGCGTTCTTTGAAGTGCTCACACA	(((((((((((((((((.(((..(((((.&.))))).)))))))))).)))))))))).	-32.9	Yes	Yes	Yes
121595_2,614877_1	inter	int-1669	int-1669	3428827	3428878	-	GTGTGGGCACTCGAAGATACGGATTCTTAACGTCGCAAGACGAAAAATGAA	rRNA	b3851	rrsA	4037064	4037106	+	CCTCCTTACCTTAAAGAAGCGTTCTTTGAAGTGCTCACACAG	5.16481e-82	9.99013e-82	49	2	GTGTGGGCACTCGAAGATACGGATTCTTA&AAAGAAGCGTTCTTTGAAGTGCTCACACA	(((((((((((((((((.(((..(((((.&.))))).)))))))))).)))))))))).	-32.9	Yes	Yes	Yes
121596_2,1309921_1	rRNA	b0201	rrsH	225303	225346	+	ACCTCCTTACCTTAAAGAAGCGTACTTTGCAGTGCTCACACAG	inter	int-2044-1	int-2044-1	4208031	4208087	+	TGTGGGCACTCGAAGATACGGATTCTTAACGTCGCAAGACGAAAAATGAATACCAA	3.13757e-117	6.69716e-117	15	2	AAAGAAGCGTACTTTGCAGTGCTCACAC&TGTGGGCACTCGAAGATACGGATTCTTA	.(((((.(((((((((.((((((((((.&))))))))))))))).))))..))))).	-29.2	Yes	Yes	Yes
1215972_1	protein_coding	b2832	ygdQ	2970395	2970440	+	CATTTTTTTGGCAGGGCTTTTTAGATGTTATTTGCATGGATAACC	tRNA	b3171	metY	3318238	3318308	-	GAATTTGCCACGTTTCAGGCGCGGGGTGGAGCAGCCTGGTAGCTCGTCGGGCTCATAACCCGAAGATCGT	0	0	1	1	TTTTTTGGCAGGGCTTTTTAGATGTTATTTGCATGGATAACC&GGGTGGAGCAGCCTGGTAGCTCGTCGGGCTCATAACCCGAAGAT	.(((((((..((((((....((.((((((.((.((....(((&.)))....))))..))))))))...)))))).....))))))).	-21.4	No	Yes	No
121602_2,142916_7	rRNA	b2591	rrsG	2729582	2729625	-	CACCTCCTTACCTTAAAGAAGCGTACTTTGCAGTGCTCACACA	inter	int-2044-1	int-2044-1	4208031	4208085	+	TGTGGGCACTCGAAGATACGGATTCTTAACGTCGCAAGACGAAAAATGAATACC	1.46612e-140	3.26991e-140	20	2	AAAGAAGCGTACTTTGCAGTGCTCACAC&TGTGGGCACTCGAAGATACGGATTCTTA	.(((((.(((((((((.((((((((((.&))))))))))))))).))))..))))).	-29.2	Yes	Yes	No
121604_2	3UTR	b2592	clpB	2731217	2731273	-	GTGTGGGCACTCGAAGATACGGATTCTTAACGTCGCAAGACGAAAAATGAATACCA	rRNA	b3278	rrsD	3427187	3427230	-	CACCTCCTTACCTTAAAGAAGCGTACTTTGCAGTGCTCACACA	5.20578e-160	1.19445e-159	14	1	GTGTGGGCACTCGAAGATACGGATTCTTA&AAAGAAGCGTACTTTGCAGTGCTCACACA	((((((((((((((((.((((..(((((.&.))))).))))))))).))))))))))).	-33.1	Yes	Yes	No
121610_18	antisense_protein_coding	antisense-b1597	antisense-b1597	1671628	1671660	-	TTTTGCCGGTTGCTGATGGCTGTGTTTCTTGG	protein_coding	b2029	gnd	2100316	2100354	-	TCCGCAAGCACAGCCAGCAGGCGACAAGGCTGAGTTCA	0.0305821	0.0364026	3	1	TGCCGGTTGCTGATGGCTGTGTTTCTTGG&TCCGCAAGCACAGCCAGCAGGCGACAAGGCT	.(((.((((((..(((((((((((..(((&.))).)))))))))))...))))))..))).	-33.7	No	Yes	No
1216708_1	ncRNA	b4433	sdsR	1923140	1923195	-	AAGCCTGCATTAATGCCAACTTTTAGCGCACGGCTCTCTCCCAAGAGCCATTTCC	protein_coding	b2175	mepS	2269953	2270008	+	AGGACTTCAAGGGAAAACAAACAACATGGTCAAATCTCAACCGATTTTGAGATAT	0	0	1	1	CTCCCAAGAGCCA&AGGACTTCAAGGGAA	.((((..(((((.&.)).)))...)))).	-9.9	No	No	Yes
121683_18	protein_coding	b0453	ybaY	475483	475516	+	TCTATTTCAGCAACACAACAACCAGCTATCCAG	ncRNA	b4443	gcvB	2942756	2942794	+	CGGTTGTGATGTTGTGTTGTTGTGTTTGCAATTGGTCT	0	0	7	1	AGCAACACAACAACCAGCTATCCAG&TTGTGATGTTGTGTTGTTGTGTTTGCA	.(((((((((((((((((.(((((.&.)).))))))).))))))))))).)).	-25.5	No	Yes	Yes
1217306_1	ncRNA	b4585	chiX	507215	507289	+	AAAGTGACGGCATAATAATAAAAAAATGAAATTCCTCTTTGACGGGCCAATAGCGATATTGGCCATTTTTTTAG	ncRNA	b3864	spf	4049898	4049989	+	GTAGGGTACAGAGGTAAGATGTTCTATCTTTCAGACCTTTTACTTCACGTAATCGGATTTGGCTGAATATTTTAGCCGCCCCAGTCAGTAA	0	0	38	1	TTTGACGGGCCAATAGCGATATTGGCCATTTTTT&CGGATTTGGCTGAATATTTTAGCCGCCCCAGTCAGT	.(((((((((...(((.(((((((((((..(((.&.)))..))))).)))))))))...))))..))))).	-22.5	Yes	Yes	Yes
1217520_1	ncRNA	b4585	chiX	507215	507287	+	AAAGTGACGGCATAATAATAAAAAAATGAAATTCCTCTTTGACGGGCCAATAGCGATATTGGCCATTTTTTT	protein_coding	b1189	dadA	1237530	1237578	+	TTATTATTCTTTTACTGTATCTACCGTTATCGGAGTGGCTATGCGAGT	0	0	1	1	CTTTGACGGGCCAATAGCGATATTGGC&ACCGTTATCGGAGTGGCTATGCGAGT	.((((...(((((....(((((.(((.&.))).)))))...)))))...)))).	-19.5	No	Yes	No
1217737_1	inter	int-144	int-144	258564	258610	-	TTTCTATCAGCTGTCCCTCCTGTTCAGCTACTGACGGGGTGGTGCG	3UTR	b4484	cpxP	4106344	4106369	+	ACACCATCCCTGTCTTCCCCCACAT	3.56109e-106	7.90708e-106	1	1	TGACGGGGTGGTGC&ACACCATCCCTGTCT	.((((((((((((.&.))))).))))))).	-21	No	Yes	No
1217959_1	3UTR	b1912	pgsA	1992120	1992183	-	ATCGAACGGCGGCACTGATTGCCAGACGATAATAAAATCAAGTGATTAACTGATTGCTTGATG	ncRNA	b3864	spf	4049927	4049986	+	TTCAGACCTTTTACTTCACGTAATCGGATTTGGCTGAATATTTTAGCCGCCCCAGTCAG	0	0	1	1	CGGCGGCACTGATTGCCAGACGATAATAAAATCAAGTGATTAACTGAT&TTCAGACCTTTTACTTCACGTAATCGGATTTGGCTGAATATTTTAGCCGCCC	.((((((...(((.((((((((((..((.....((((((....((((.&.)))).....))))))....))))))..)))))).....)))...)))))).	-26.5	Yes	No	No
1218609_1	ncRNA	b4444	omrA	2976102	2976168	-	GATTATTCGGTACGCTCTTCGTACCCTGTCTCTTGCACCAACCTGCGCGGATGCGCAGGTTTTTTT	3UTR	b4314	fimA	4543674	4543709	+	TCAGGGACGTCATTACGGGCAGGGATGCCCACCCT	0	0	1	1	CGGTACGCTCTTCGTACCCTGTCTCTTGCACCAACCTGC&TCAGGGACGTCATTACGGGCAGGGATGCCCACCC	.(((..((.....((.((((((((..((.((...((((.&.))))...))))....))))))))))))..))).	-22	No	Yes	No
1218662_1	ncRNA	b4691	sroH	4190380	4190412	-	TATCGCAAGGTCAAGGCAAAGTCCGGTAATGG	protein_coding	b4161	rsgA	4391050	4391089	-	ATCGACCGTTACCTGGTGGCCTGCGAAACCTTGCAGATT	2.68351e-27	4.48647e-27	1	1	TATCGCAAGGTCAAGGCAAAGTCCGGTAATGG&ACCGTTACCTGGTGGCCTGCGAAACCTTGCAGATT	.((((((((((..((((.....((((((((((&.)))))))).))..)))).....))))))).))).	-30.2	Yes	No	No
121946_18	ncRNA	b4450	arcZ	3350642	3350681	+	TTCCCTGGTGTTGGCGCAGTATTCGCGCACCCCGGTCTA	antisense_protein_coding	antisense-b3327	antisense-b3327	3460230	3460260	-	ATCAGCCAGCTTTTCCAACACCGGGGCCAG	2.02558e-15	3.11197e-15	3	1	TCCCTGGTGTTGGCGCAGTATTCGCG&AGCCAGCTTTTCCAACACCGGGGC	.((((((((((((...(((....((.&.))..)))...)))))))))))).	-25.4	No	Yes	No
121991_18	rRNA	b0204	rrlH	227795	227815	+	GTGTACCCGCGGCAAGACGG	protein_coding	b2037	wzxB	2108440	2108494	-	TTTTAATCGCTGCGGGTTTGTTGAGTTTGTTGTTGATTTTTCCGCTAACAACTC	2.6705e-216	7.01508e-216	1	1	TACCCGCGGCA&CGCTGCGGGTT	.(((((((((.&.))))))))).	-18.9	No	Yes	No
1220065_1	rRNA	b0204	rrlH	226260	226286	+	AAAGAACCTGAAACCGTGTACGTACA	rRNA	b2589	rrlG	2729151	2729172	-	AAGCGTACACGGTGGATGCCC	4.07726e-267	1.1279e-266	1	1	AACCGTGTACGTA&AGCGTACACGGTG	.(((((((((((.&.))))))))))).	-19.8	No	No	Yes
1220442_1	ncRNA	b4443	gcvB	2942696	2942714	+	CTTCCTGAGCCGGAACGA	3UTR	b3017	ftsP	3161163	3161209	-	CTCTTTCGTTCCGGCTTATAATCCCCGGCCTTTGATTATTTTTTTA	0	0	3	1	CTGAGCCGGAACGA&TTCGTTCCGGCTTAT	.(((((((((((((&.))))))))))))).	-23	No	No	Yes
122064_20	protein_coding	b0953	rmf	1015812	1015926	+	GCTGAATCAAAGGTCACAATGGCTGGGAGGCTGGCGAGAAGCCATGGCGGACAGGGTAGTAATGGCCTGATTCTGTCTCTTTAAAAAGAAACCTCCGCATTGCGGAGGTTTCGC	ncRNA	b4438	cyaR	2167156	2167180	+	ACCTCCTTAGCCTGTGTAATCTCC	0	0	5	1	AAGGTCACAATGGCTGGGAGGC&ACCTCCTTAGCCTGTGTAATCTC	.((((.(((..((((((((((.&.)))))).))))..))).)))).	-23.2	No	Yes	No
1220807_1	ncRNA	b4585	chiX	507227	507288	+	TAATAATAAAAAAATGAAATTCCTCTTTGACGGGCCAATAGCGATATTGGCCATTTTTTTA	protein_coding	b2214	apbE	2311503	2311521	-	TTACCCGCGTGGCACTGC	1.20431e-23	1.96871e-23	1	1	ACGGGCCAATAGCGA&CCGCGTGGCACTGC	.(((((((...(((.&.))).)))).))).	-13.1	No	No	Yes
1221032_1	protein_coding	b1185	dsbB	1232644	1232708	-	TTCGTTTCCCGGAATGGCTGCCGCTGGATAAGTGGGTGCCGCAAGTGTTTGTCGCCTCTGGCGA	ncRNA	b1954	dsrA	2025241	2025267	-	CTTAAGCAAGTTTCATCCCGACCCCC	0	0	1	1	TGGATAAGTGGGTGCCGCAAGTGTTTGT&TTAAGCAAGTTTCATCCCGACCCCC	.((....(.(((((..((...((((((.&.)))))).))..))))))....)).	-11.3	No	Yes	No
1221176_1	protein_coding	b0025	ribF	21844	21877	+	TACGGCTTCGATATCACCAGTACGCAAACTTTT	protein_coding	b0118	acnB	132620	132651	+	TTGATGAAGTGCGTGCTGGTGGCCGTATTCC	0.0200906	0.0242178	1	1	TACGGCTTCGATATCACCAGTACGCAAACTTTT&TGAAGTGCGTGCTGGTGGCCGTAT	((((((........(((((((((((..(((((.&.)))))))))))))))))))))).	-30.4	No	Yes	No
122135_8	inter	int-1079	int-1079	2057932	2057950	-	AAAAAAGTGACCGGGTTT	inter	int-4377-1	int-4377-1	4287505	4287527	+	TTTGAAGGTCAGCAACAAAAGT	8.89549e-09	1.27723e-08	1	1	GTGACCG&AGGTCAG	.(((((.&.))))).	-7.6	Yes	No	No
12214_200	rRNA	b3851	rrsA	4036697	4036735	+	TAAACTGGAGGAAGGTGGGGATGACGTCAAGTCATCAT	3UTR	b4484	cpxP	4106330	4106369	+	TTTCCTTGCCATAGACACCATCCCTGTCTTCCCCCACAT	4.32373e-239	1.09484e-238	3	1	CTGGAGGAAGGTGGGGATGACGTCA&AGACACCATCCCTGTCTTCCCCCAC	.(((.((((((((((((((..(((.&.)))..)))))))))))))).))).	-29.7	Yes	No	Yes
1221689_1	5UTR	b0440	hupB	461391	461418	+	TGCGCGTTCGTACCTTGAAGGATTCAA	5UTR	b2181	yejG	2278321	2278396	-	CAAACGTGACCACGCCCGCAGATATTACTTAAATCAGAGCCATAGAGGCCACGCAGGCGAGGCATCAATCTTTAC	5.73792e-155	1.38556e-154	1	1	GCGCGTTCGTACCTTGAAGGATTCA&AGAGCCATAGAGGCCACGCAGGCGA	.(((.(.(((.((((...((.(((.&.)))))...))))..))).).))).	-16.3	No	No	Yes
1221690_1	5UTR	b0440	hupB	461391	461433	+	TGCGCGTTCGTACCTTGAAGGATTCAAGTGCGATATAAATTA	ncRNA	b4704	arrS	3657984	3658044	-	TTAAATATCGAGTCTCCTTGTTTCGACTTAAGCTGGCAATTGGATTGCCAGCTTTCTTTT	0	0	2	1	TGCGCGTTCGTACCTTGAAGGATTCAAGTGCGATATA&AATATCGAGTCTCCTTGTTTCGACTTAAGCTGGCAATTGGATTGCCAG	((.(((.((((..(((((..((..((((..((((((.&.))))))......))))..))...)))))...)).....)).))))).	-14.6	No	Yes	Yes
1221915_1	ncRNA	b4585	chiX	507216	507288	+	AAGTGACGGCATAATAATAAAAAAATGAAATTCCTCTTTGACGGGCCAATAGCGATATTGGCCATTTTTTTA	ncRNA	b4408	csrB	2924198	2924287	-	TAGTTCAGGATGAACGATTGGCCGCAAGGCCAGAGGAAAAGTTGTCAAGGATGAGCAGGGAGCAACAAAAGTAGCTGGAATGCTGCGAA	0	0	4	1	GTGACGGCATAATAATAAAAAAATGAAATTCCTCTTTGACGGGCCAATAGCGATATTGGCCATTTTT&CAGGATGAACGATTGGCCGCAAGGCCAGAGGAAAAGTTGTCAAGGATGAGCAGGGAGCAACAAAAGTAGCTGGAATGCTGCGA	.((.((((((..((..............(((((((((((((((((....(((..((((..((((((.&.))))))..))))....)))..))))...........)))))))))......))))..............))..)))))))).	-31.4	No	Yes	Yes
1222164_1	ncRNA	b1954	dsrA	2025239	2025286	-	ATTTTTTAAGTGCTTCTTGCTTAAGCAAGTTTCATCCCGACCCCCTC	rRNA	b2591	rrsG	2729967	2729989	-	AAACTGGAGGAAGGTGGGGATG	0	0	1	1	TCATCCCGACCCCCTC&GGAGGAAGGTGGGGATG	.((((((.(((.((((&.))))..))).))))))	-20.6	Yes	No	No
1222182_1	ncRNA	b4704	arrS	3657985	3658054	-	GTAATCCGATTTAAATATCGAGTCTCCTTGTTTCGACTTAAGCTGGCAATTGGATTGCCAGCTTTCTTT	5UTR	b3729	glmS	3913809	3913830	-	ATTCTGGCCGGCTAACCCGGT	0	0	1	1	AGCTGGCAATTGGATTGCCAGC&TCTGGCCGGCTAACCCGGT	.(((((...((((...(((((.&.)))))...)))).)))))	-16.2	No	Yes	No
122262_20	ncRNA	b4417	rybB	887977	888008	-	CCATTTCGGTTCAAGGTTGATGGGTTTTTTG	ncRNA	b4456	glmZ	3986592	3986617	+	AGACCTGTTTTAACGCCTGCTCCGT	0	0	3	1	TCGGTTCAAGGTTGATGGGTTT&AGACCTGTTTTAACGCCTGCTCCGT	.(((....((((.((((((((.&.)))))))).....))))...))).	-14.1	No	Yes	No
1222871_1	inter	int-1038-1	int-1038-1	1997006	1997036	+	GCTTGAAATGGCGTCCAGCCCCGACAGGTG	rRNA	b3758	rrlC	3946360	3946422	+	CGAGAGGACCGGAGTGGACGCATCACTGGTGTTCGGGTTGTCATGCCAATGGCACTGCCCGG	8.21208e-273	2.29199e-272	1	1	GCTTGAAATGGCGTCCAGCCCCGACAGGTG&TCACTGGTGTTCGGGTTGTCATGCCAATGGCA	(((.....((((((.((((((.((((((((&.))))..)))).))))))..))))))..))).	-25.4	No	Yes	No
1223045_1	5UTR	b1779	gapA	1862684	1862750	+	TTGACACGATTCCGCTTGACGCTGCGTAAGGTTTTTGTAATTTTACAGGCAACCTTTTATTCACTA	protein_coding	b2515	ispG	2641408	2641469	-	CGGTAATGAAGAGCGTATTCGCATGGTGGTTGACTGTGCGCGCGATAAAAACATTCCGATC	7.52349e-06	1.0216e-05	1	1	GCGTAAGGTTTTTGTAATTTTACAGGCAACCTTTTATTCACTA&CGGTAATGAAGAGCGTATTCGCATGGTGGTTGACTGTGCGCGCGATAAAAACATTCCGA	.((.((.((((((((.....(((((.((((((((((((.(((.&.))))))))))................))))).)))))......)))))))).)).)).	-19.9	No	Yes	No
1223679_1	ncRNA	b4446	sibC	3056851	3056890	+	AGGGTAAGGGAGGATTGCTCCTCCCCTGAGACTGACTGT	inter	int-1697	int-1697	3496960	3496990	-	TAAAAAATAAAAACAAAAAATAAAACAAAA	0.000163927	0.000215876	1	1	CTGT&AACAA	.(((&.))).	-0.5	No	No	Yes
1224154_1	inter	int-1945	int-1945	4021869	4021894	-	ACACGGCCCGCCTTGAGCGATGAAA	tRNA	b4163	glyV	4392387	4392413	+	ACCTTGCCAAGGTCGGGGTCGCGAGT	0	0	1	1	ACACGGCCCGCCTTGAGCGAT&CTTGCCAAGGTCGGGGTCGCGA	.(.((((((((((((.((((.&.))))))))))..)))))).).	-23.9	No	Yes	No
1224274_1	5UTR	b1838	pphA	1923104	1923153	-	AAGAGCCATTTCCCTGGACCGAATACAGGAATCGTGTTCGGTCTCTTTT	protein_coding	b4606	ypfM	2590832	2590867	-	TATGATTGAACGTGAACTGGGGAACTGGAAAGACT	0	0	1	1	GCCATTTCCCTGGACCGAATACAGGAATCGTGTTCGGTCT&TGATTGAACGTGAACTGGGGAACTGGA	.(((.((((((((..............((((((((((((.&.)))))))))))).)))))))).))).	-24.2	Yes	No	No
122502_1	protein_coding	b0720	gltA	754167	754206	-	ACATCCTGCTGAATGGTGAAAAACCGACTCAGGAACAGT	3UTR	b3863	polA	4049848	4049875	+	ATTACAAAAAGTGCTTTCTGAACTGAA	1.77885e-07	2.28655e-07	1	1	CTCAGGAACAGT&AAGTGCTTTCTGAA	.(((((((((.(&.).)).))))))).	-7.7	No	No	Yes
1225227_1	protein_coding	b3516	gadX	3664921	3664998	-	AATAAGATTATAGAGTTTTACTCAGACATAAAAAAAACCCGGCATAGGGGACCGGGAAGAGGATAGTCTGCCGTCTC	protein_coding	b3748	rbsD	3933459	3933553	+	CAACGCGTATCGATATGGCATTAACCCAGGGTGTACCTTCTTTTATGCAGGTGCTGGGCGTCGTCACAAATGAAATGCAGGTCGAGGCGGCCAT	0	0	2	1	AGATTATAGAGTTTTACTCAGACATAAAAAAAACCCGGCATAGGGGACCGGGAAGAGGATAGTCTGCCGTCTC&CGATATGGCATTAACCCAGGGTGTACCTTCTTTTATGCAGGTGCTGGGCGTCGTCACAAATGAAATGCAGGTCG	.((((.....((((((....(((..........((((((((....(....(((((((((((.((((((((.((&.)).))))))........)).))).))).)))))...)..))))))))....))).....))))))...)))).	-30.3	Yes	No	No
122550_18	3UTR	b0802	ybiJ	837452	837533	-	TATTTCCCTGTCTGTTTGCCGACAGACGCATATGCTCTAACCCTCATTGATCCTATGTTACCCTTGTTTGCCCGTCCGCCA	protein_coding	b2215	ompC	2312747	2312829	-	TGCCGACTGATTAATGAGGGTTAATCAGTATGCAGTGGCATAAAAAAGCAAATAAAGGCATATAACAGAGGGTTAATAACAT	0	0	92	1	TATTTCCCTGTCTGTTTGCCGACAGACGCATATGCTCTAACCCTCATTGATCCTATGTTACCCTTGTTTGCCCGTCCGCC&TGCCGACTGATTAATGAGGGTTAATCAGTATGCAGTGGCATAAAAAAGCAAATAAAGGCATATAACAGAGGGTTAATAA	((((..(((.((((((((((.....((((((((....(((((((((((((((.....................(((.((.&.)).))).)))))))))))))))....)))))).))....................))))...)))))))))..)))).	-44.5	Yes	Yes	Yes
1226117_1	5UTR	b1838	pphA	1923104	1923154	-	CAAGAGCCATTTCCCTGGACCGAATACAGGAATCGTGTTCGGTCTCTTTT	rRNA	b2589	rrlG	2727913	2727977	-	CTGCGAAGGTGTGCTGTGAGGCATGCTGGAGGTATCAGAAGTGCGAATGCTGACATAAGTAACG	0	0	1	1	GAGCCATTTCCCTGGACCGAATACAGGAATCGTGTTCGGTCTCTTTT&CGAAGGTGTGCTGTGAGGCATGCTGGAGGTATCAGAAGTGCGAATGCTG	.(((((((((..((((((.....(((.(...((.(((((((.(((((&.))))).).)))).)).)).).)))..))).))))))))).....))).	-20.2	No	No	Yes
1226162_1	ncRNA	b4443	gcvB	2942756	2942796	+	CGGTTGTGATGTTGTGTTGTTGTGTTTGCAATTGGTCTGC	inter	int-4412	int-4412	4338110	4338129	-	CCCACCCCGCGCTTTTTTT	0	0	1	1	CGGTTGTGA&CCACCCCGC	(((..(((.&.))).))).	-5.5	No	Yes	No
12272_324,530059_6	ncRNA	b4438	cyaR	2167138	2167196	+	CTAGCTGTACCAGGAACCACCTCCTTAGCCTGTGTAATCTCCCTTACACGGGCTTATT	protein_coding	b3770	ilvE	3952507	3952539	+	ATTTGGTTCAATGGGGAGATGGTTCGCTGGGA	9.15227e-265	2.52065e-264	25	2	ACCAGGAACCACCTCCTTAGCCT&TGGTTCAATGGGGAGATGGTTCGCTGGG	.((((((((((.((((((((((.&.)))....))))))).)))))).)))).	-28	No	Yes	No
1227653_1	protein_coding	b1713	pheT	1796514	1796542	-	TTTACGGCTACAACAACATCCCGGATGA	tRNA	b2816	metV	2947569	2947641	+	ACCAATCAAATTTGATGAAGTAAAAGCAGTACGGTGACGCGGGGTGGAGCAGCCTGGTAGCTCGTCGGGCTC	0.000553433	0.000719099	1	1	TACGGCTACAACAACATCCCGG&GCGGGGTGGAGCAGCCTGGTAGCTCGTC	.((((((((.....(((((((.&.)))))))..........))))).))).	-20.3	No	Yes	No
1228613_1	ncRNA	b4432	ryeA	1923044	1923173	+	GTGTGTGTTATGGTTGACTATAAAGTCAGCGAAGGAAATGCTTCTGGCTTTTAACAGATAAAAAGAGACCGAACACGATTCCTGTATTCGGTCCAGGGAAATGGCTCTTGGGAGAGAGCCGTGCGCTAA	ncRNA	b3864	spf	4049898	4050005	+	GTAGGGTACAGAGGTAAGATGTTCTATCTTTCAGACCTTTTACTTCACGTAATCGGATTTGGCTGAATATTTTAGCCGCCCCAGTCAGTAATGACTGGGGCGTTTTT	0	0	31	1	GTGTGTGTTATGGTTGACTATAAAGTCAGCGAAGGAAATGCTTCTGGCTTTTAACAGATAAAAAGAGACCGAACACGATTCCTGTATTCGGTCCAGGGAAATGGCTCTTGGGAGAGAGCCGTGCG&GTAGGGTACAGAGGTAAGATGTTCTATCTTTCAGACCTTTTACTTCACGTAATCGGATTTGGCTGAATATTTTAGCCGCCCCAGTCAGTAATGACTGGGGCG	((.(..(((((..((((((.........(((...((((((.(((.((((................(((((((..(((......(((...((((.(((((...((((((((.......(((.(((.&))).))).......))))).)))...)))))..))))...)))....)))..)))).))))))))))))))))...)))...))))))..)))))..).)).	-47.4	Yes	Yes	Yes
1228624_1	rRNA	b3278	rrsD	3427942	3427970	-	TACCCTGGTAGTCCACGCCGTAAACGAT	ncRNA	b3864	spf	4049926	4049949	+	TTTCAGACCTTTTACTTCACGTA	0	0	1	1	CCTGGT&TTCAGA	.((((.&.)))).	-3.2	No	No	Yes
122926_15	rRNA	b3970	rrlB	4170403	4170425	+	CTGGCTGCAACTGTTTATTAAA	protein_coding	b3986	rplL	4180581	4180608	+	TCATTGAAGCAGTTGCAGCTATGTCTG	3.04923e-22	4.94372e-22	1	1	CTGGCTGCAACTGTTTA&GAAGCAGTTGCAGCTAT	.(((((((((((((((.&.))))))))))))))).	-24.3	Yes	No	No
1229580_1	ncRNA	b1954	dsrA	2025241	2025261	-	CAAGTTTCATCCCGACCCCC	3UTR	b4037	malM	4250488	4250533	+	GCTGATTTTGCAACAACTGGTGCGTCTCCTGGCGCACCTTTTTTT	0	0	1	1	AGTTTCATCCCGACCCCC&TGGTGCGTCTCCTGGCGCA	.((.(((....((((((.&.)).).)))...))).)).	-5.9	No	No	Yes
1229931_1	pseudogene	b4581	ybeM	657964	658037	+	TGAGTGATAAGTGTAACGCCGAATAATCGTCGTTGGCGAATTTTACGACTCTGACAGGAGGTGGCAATGCTGG	protein_coding	b2501	ppk	2623948	2624012	+	TTTCCCCAATGTCGGCAAAGCCAATCTGGTGAACAAACCACTGCCGCGTTTACGCCATATTTGG	5.31275e-11	7.8319e-11	1	1	GCCGAATAATCGTCGTTGGCGAATTTTACGACTCTGACAGGAGGTGGCAATGCTGG&TCGGCAAAGCCAATCTGGTGAACAAACCACTGCCGCGTTTACGCCATATTTGG	.(((((((..(((((.(((((...........((...((((...((((..(((((.&.)))))..)))).))))..)).........)))))))...)))...)))))))	-28.3	No	Yes	No
1230472_1	ncRNA	b4450	arcZ	3350641	3350660	+	TTTCCCTGGTGTTGGCGCA	protein_coding	b4258	valS	4483585	4483603	-	ACTGACCACGCCGGGATC	1.71196e-09	2.48132e-09	2	1	CCCTGGTGTTGGCGC&CTGACCACGCCGGGA	.(((((((.(((((.&.)).)))))))))).	-16.4	No	Yes	No
1230693_1	ncRNA	b4432	ryeA	1923240	1923310	+	GTTTGCGTGCAAAATGGTCAATAAAAAGCGTGGTGGTCATCAGCTGAAATGTTAAAAACCGCCCGTTCTG	inter	int-3444	int-3444	2427831	2427891	-	ACTGTTGTCGTCAAGATGGCATAAGACCTGCATGAAAGAGCCTGCAAACACACAACACAA	0	0	1	1	GTTTGCGTGCAAAATGGTCAATAAAAAGCGTGGTGGTCATCAGC&ACTGTTGTCGTCAAGATGGCATAAGACCTGCATGAAAGAGCCTGCAAACA	(((((((((((....((((...........((((((.((.(((.&.))).))))))))...........)))))))))..........)))))).	-21.7	No	Yes	No
1231216_1	protein_coding	b0145	dksA	160313	160384	-	ACCGTGCAGCCCAGGAAGAAGAGTTCAGCCTCGAACTGCGTAACCGCGATCGCGAGCGTAAGCTGATCAAA	ncRNA	b4443	gcvB	2942696	2942719	+	CTTCCTGAGCCGGAACGAAAAGT	0	0	1	1	CCGTGCAGCCCAGGAAGA&CTTCCTGAGCCGGAACGA	.(((.(.((.(((((((.&))))))).))..).))).	-16.8	No	Yes	No
123136_18	protein_coding	b2443	yffL	2560696	2560731	+	CTCACAGTTGGGATGGTGCAGGGTTGGTAGGGGAA	3UTR	b4484	cpxP	4106330	4106387	+	TTTCCTTGCCATAGACACCATCCCTGTCTTCCCCCACATGCTGTGGGGGTTTTTTTT	1.163e-25	1.92296e-25	12	1	CTCACAGTTGGGATGGTGCAGGGTTGGTAGGGGAA&TTTCCTTGCCATAGACACCATCCCTGTCTTCCCCCACATGCTGTGGGG	((((((((.(((((((((......((((((((((.&.))))))))))....)))))))))...............)))))))).	-39.3	No	Yes	Yes
1231407_1	protein_coding	b2597	raiA	2737123	2737166	+	ACCAAGACGGGAAGACAAGAGGTAAAATTTATGACAATGAACA	ncRNA	b4443	gcvB	2942696	2942725	+	CTTCCTGAGCCGGAACGAAAAGTTTTATC	0	0	1	1	ACCAAGACGGGAAGA&CTTCCTGAGCCGGA	.((....(((((((.&)))))))....)).	-11.3	No	Yes	No
123143_1	protein_coding	b0632	dacA	663338	663359	-	TCCGTGACGTACCGAATGAAT	3UTR	b0655	gltI	686784	686833	-	AGAACCAGGGGCGGAAATTCCAGCCCTCTCGATTGTTACGTAGCACGGA	1.14657e-247	2.94264e-247	1	1	TCCGTGACGTACCGAATGAA&CTCGATTGTTACGTAGCACGGA	(((((((((((.(((.(((.&.))).))).)))))..))))))	-16.5	Yes	No	No
1231582_1	5UTR	b0654	gltJ	686703	686739	-	CAATACGCTGGGTAACAATCTTCGAGGGTAGCAGTT	protein_coding	b0681	chiP	708292	708337	+	ACCTTTGGTGCAGCAATTTATACGTCAAAGAGGATTAACCCATGC	0	0	1	1	CGCTGGGTAACAATCTTCGAGGGTA&ACCTTTGGTGCAGCAATTTATACGTCAAAGAGGATTAACCCATGC	.(((((((...(((((((((((((.&)))))).......................))))))).))))).))	-18	No	No	Yes
12321_49	protein_coding	b0598	cstA	631781	631816	+	ATACTGAGTCACAGCTGGCGCAACTGGTGTTCAAC	antisense_protein_coding	antisense-b1673	antisense-b1673	1753607	1753631	+	GAGAACTACAGGGGGCACCAGATC	0	0	6	1	GCTGGCGCAACTGGTGTTCA&AGAACTACAGGGGGCACCAGA	.((((.((..((.((((((.&.)))).)).))..)).)))).	-18.5	No	Yes	No
1232294_1	protein_coding	b1683	sufB	1763403	1763466	-	AAATATCTCGGCACCGTGGTGCCGGGGAATGACAACTTCTTTGCCGCGCTTAATGCGGCGGTA	protein_coding	b2260	menE	2374824	2374887	-	ATTAGCCTCCGGATTTGCGGTGCAGGGGGTGGTTGAGGGCAGCGGCGTGATGTTGCGGGCGTG	0.0194866	0.0235048	1	1	ATATCTCGGCACCGTGGTGCCGGGGAATGACAACTTCTTTGCCGCGCTTAATGCGGCGGTA&AGCCTCCGGATTTGCGGTGCAGGGGGTGGTTGAGGGCAGCGGCGTGATGTTGCGGGCGTG	.(((.((.(((.(((.((((((..(..(..((((((((((((..(((..(((.(((.(((.&.))).))).))).)))..)))))))..))))).)..)..)))))).))).))).)).)))	-47.2	Yes	No	No
1232592_1	5UTR	b4217	ytfK	4439532	4439573	+	ATAGTTGGGCCGATTGTGGCACCGCACAGGCGTAATACTCA	inter	int-4518	int-4518	4555402	4555420	-	GTAATACTCATTGCGACT	2.53954e-09	3.66948e-09	1	1	CCGCACAGGCGTAATACT&GTAATACTCATTGCGA	.((((..((.(((.(((.&))).)))))..)))).	-9.6	No	No	Yes
1232818_1	ncRNA	b4432	ryeA	1923074	1923156	+	GAAGGAAATGCTTCTGGCTTTTAACAGATAAAAAGAGACCGAACACGATTCCTGTATTCGGTCCAGGGAAATGGCTCTTGGG	ncRNA	b4624	ryjB	4528042	4528116	+	GAAGGCGGCAGGGATCGCAGAAGGGTTATTGCTCTTTGCCGGGGATAAGCGCTCTGCTTATCCCCATCTTATCG	0	0	2	1	AGGAAATGCTTCTGGCTTTTAACAGATAAAAAGAGACCGAACACGATTCCTGTATTCGGTCCA&AGGCGGCAGGGATCGCAGAAGGGTTATTGCTCTTTGCCGGGGATAAGCGCTCTGCTTATCCC	.(((...((.....((((.(..(......(((((((((.....((((((((((...((..((.&.))))))))))))))......))).....))))))....)..).)))).....))...))).	-32.7	No	Yes	Yes
1232996_1	ncRNA	b4585	chiX	507215	507288	+	AAAGTGACGGCATAATAATAAAAAAATGAAATTCCTCTTTGACGGGCCAATAGCGATATTGGCCATTTTTTTA	ncRNA	b4432	ryeA	1923064	1923174	+	TAAAGTCAGCGAAGGAAATGCTTCTGGCTTTTAACAGATAAAAAGAGACCGAACACGATTCCTGTATTCGGTCCAGGGAAATGGCTCTTGGGAGAGAGCCGTGCGCTAAA	0	0	26	1	AAGTGACGGCATAATAATAAAAAAATGAAATTCCTCTTTGACGGGCCAATAGCGATATTGGCCA&CGGTCCAGGGAAATGGCTCTTGGGAGAGAGCCGTGCGCTA	.(((((((((.......................((((((.(.((((((.........((((((.&.)).)))).....)))))).).)))))).))))).)))).	-30.8	Yes	Yes	Yes
1233825_1	protein_coding	b2096	gatY	2176402	2176432	-	ATTATTTGCAGTCGGCTAAATCCGCAATGC	antisense_ncRNA	antisense-b4452	antisense-b4452	3664909	3664979	-	ACTCAGACATAAAAAAAACCCGGCATAGGGGACCGGGAAGAGGATAGTCTGCCGTCTCCAGACTAATAAA	0	0	1	1	ATTATTTGCAGTCGGCTAAATCCGCAATGC&GGCATAGGGGACCGGGAAGAGGATAGTCTGCCGTCTCCAGACTAATA	((((((((.((.((((....(((.(.((((&.)))).).)))..................)))).)).)))).)))).	-18.1	Yes	No	No
1234125_1	protein_coding	b1049	opgH	1112206	1112279	+	GACTTCGTGGAAGCGGCGTTGATGCGCCGTGCAGGTTGGGGGGTCTGGATTGCTTACGATCTCCCGGGTTCTT	5UTR	b3708	tnaA	3888685	3888724	+	ATTCACAGGGATCACTGTAATTAAAATAAATGAAGGATT	3.56127e-57	6.80778e-57	1	1	ACTTCGTGGAAGCGGCGTTGATGCGCCGTGC&TCACAGGGATCACTGTAATTAAAATAAATGAAGG	.((((((.......(((.((((.(.(.(((.&.))).)).)))).)))...........)))))).	-13.4	Yes	No	No
1234339_1	ncRNA	b4442	micA	2814834	2814880	+	TTCAGAGATGAAATTTTGGCCACTCACGAGTGGCCTTTTTCTTTTC	protein_coding	b4016	aceK	4218882	4218934	+	CGAGATTGCGGAGAGCTTTTTTAACTCCGTGTACTGTCGGTTATTTGACCAC	0	0	1	1	GAGATGAAATTTTGGCCACTCACGAGTGGCCTTTTTCTTTTC&CGAGATTGCGGAGAGCTTTTTTAACTCCGTGTACTGTCGGTTATTTG	.((((((....(((((....((((((((((((((....((((&.))))....)))).)))......)))).)))....))))))))))).	-16.1	Yes	No	No
123504_18	5UTR	b2286	nuoC	2403867	2403907	-	ATCTATTTCGCGAAGCTTACTGCGCCGACAGTCACCACGG	ncRNA	b4450	arcZ	3350641	3350681	+	TTTCCCTGGTGTTGGCGCAGTATTCGCGCACCCCGGTCTA	0	0	2	1	TCGCGAAGCTTACTGCGCCGACAGTCACCACGG&TCCCTGGTGTTGGCGCAGTATTCGCGC	.((((((...((((((((((((....((((.((&.)).)))))))))))))))))))))).	-34.5	No	No	Yes
1235061_1	protein_coding	b1025	ycdT	1093337	1093354	+	TTGTTTTTTGTTTTTGG	ncRNA	b4443	gcvB	2942748	2942792	+	TTGGCTTACGGTTGTGATGTTGTGTTGTTGTGTTTGCAATTGGT	2.84359e-125	6.57663e-125	1	1	TTTGTT&TGCAAT	.((((.&.)))).	-1.7	No	Yes	No
123520_18	protein_coding	b0914	msbA	968253	968294	+	CAGACGAAATCGTGGTCGTCGAGGATGGTGTCATTGTGGAA	3UTR	b4484	cpxP	4106330	4106386	+	TTTCCTTGCCATAGACACCATCCCTGTCTTCCCCCACATGCTGTGGGGGTTTTTTT	1.14335e-178	2.85552e-178	13	1	GACGAAATCGTGGTCGTCGAGGATGGTGTCATTGTGGA&GCCATAGACACCATCCCTGTCTTCCCCCACATGCTGTG	.(((..((.((((..(..((((((((((((..(((((.&.)))))))))))))))...))..)..))))))..))).	-29.1	No	Yes	Yes
123577_18	3UTR	b4484	cpxP	4106329	4106374	+	TTTTCCTTGCCATAGACACCATCCCTGTCTTCCCCCACATGCTGT	protein_coding	b3921	yiiR	4112579	4112641	+	ACTGGGCGATTTTACCGGGTGTCTGGCAATGGGCGGTGGGGCGTTTTGTCCCGACGTTGATT	1.81358e-65	3.57805e-65	10	1	TTCCTTGCCATAGACACCATCCCTGTCTTCCCCCAC&CTGGGCGATTTTACCGGGTGTCTGGCAATGGGC	.((((((((..(((((((..........((.((((.&.)))).))........)))))))))))).))).	-27.1	Yes	Yes	Yes
1236063_1	protein_coding	b0594	entE	627296	627313	+	TCAGTGATATAGTCTGCGCCATCTGATCGTAAGTAG	ncRNA	b4456	glmZ	3986593	3986617	+	CCTCTGTAGTTCAGTCGGTAGAACGGCGGACTGTTAAT	0.0113607	0.0139204	1	1	TATAGTCTGCGCCATCTGATCGTAAGTAG&CCTCTGTAGTTCAGTCGGTAGAACGGCGGACTGTT	.((((((((((((..((((.(...((.((&.))))...).))))..)))......))))))))).	-21	No	Yes	No
123606_1	3UTR	b0173	dxr	194763	194799	+	TCAGTGATATAGTCTGCGCCATCTGATCGTAAGTAG	tRNA	b1986	asnU	2059851	2059889	+	CCTCTGTAGTTCAGTCGGTAGAACGGCGGACTGTTAAT	0	0	1	1	TATAGTCTGCGCCATCTGATCGTAAGTAG&CCTCTGTAGTTCAGTCGGTAGAACGGCGGACTGTT	.((((((((((((..((((.(...((.((&.))))...).))))..)))......))))))))).	-21	Yes	No	No
1236580_1	ncRNA	b4443	gcvB	2942702	2942776	+	GAGCCGGAACGAAAAGTTTTATCGGAATGCGTGTTCTGGTGAACTTTTGGCTTACGGTTGTGATGTTGTGTTGT	protein_coding	b3294	rplQ	3439651	3439712	-	TATTCTGAAGTGTGGCTTCCGTGCAGGCGACAACGCGCCGATGGCTTACATCGAGCTGGTT	0	0	1	1	GAGCCGGAACGAAAAGTTTTATCGGAATGCGTGTTCTGGTGAACTTTTGGCTTACGGTTGTGATG&TGTGGCTTCCGTGCAGGCGACAACGCGCCGATGGCTTACATCGAGCTGGTT	.((((((..(((.((((..((((((..(((((..............(((.(((((((..((.((.&.)).))..))))).)).)))..)))))))))))))))...)))..))))))	-37.3	Yes	No	No
1236612_1	protein_coding	b1087	yceF	1146094	1146165	-	CCCTGCACTGCGCGGGTAGCTTTAAGAGTGAAGGATTTGGCATTACGCTGTTTGAGCGTTTAGAGGGGCGT	3UTR	b3870	glnA	4056581	4056621	-	TTTTAGTTGCCGTGGAAACTTTTCGCCTGTCTCTGGCAGG	1.85152e-59	3.57214e-59	1	1	CCCTGCACTGCGCGGGTAGCTTTAAGAGTGAAGGATTTGGCATTACGCTGT&TTAGTTGCCGTGGAAACTTTTCGCCTGTCTCTGGCAGG	.(((((.....((((((.(....((((((........(((((....((((.&.))))))))).....))))))))))))).....)))))	-24	No	Yes	No
1236833_1	ncRNA	b4432	ryeA	1923072	1923142	+	GCGAAGGAAATGCTTCTGGCTTTTAACAGATAAAAAGAGACCGAACACGATTCCTGTATTCGGTCCAGGG	5UTR	b2573	rpoE	2710161	2710190	-	ATTCTGTAGACTTATAATGATAGATAATG	0	0	1	1	CCTGTATTCGGTCCAGGG&TTCTGTAGACTTATAATGATAGA	.(((((((.((((((((.&.))))..))))...))).)))).	-7.8	Yes	No	Yes
1237144_1	inter	int-2899	int-2899	1418407	1418470	-	ATTGCTGTGTGTAGTCCTGGCGGCATCAGTTTTTTTCTTGAAGTTCGGCTGATGTCCGCCCTT	rRNA	b2589	rrlG	2728268	2728324	-	AGAGCACTGTTTCGGCAAGGGGGTCATCCCGACTTACCAACCCGATGCAAACTGCG	4.20597e-46	7.7691e-46	1	1	TGTAGTCCTGGCGGCATCAGTTTTTTTCTTGAAGTTCGGCTGATGTCCGCCCTT&CAAGGGGGTCATCCCGACTTACCAACCCGATGCAAACTGCG	.(((((.......(((((.(((.........(((.((((..((((.((.(((((&.))))))).)))))))))))...)))..)))))..))))).	-28.5	No	Yes	No
1237241_1	protein_coding	b2331	smrB	2448593	2448662	+	TCTATGAAAACAGTGAG	rRNA	b3854	rrlA	4038379	4038434	+	ATTGGCAGCGGCGAGGAT	8.74728e-22	1.4127e-21	1	1	ACAGTG&ATTGG	.((((.&)))).	-1.8	No	Yes	No
123724_8	protein_coding	b1487	ddpA	1561143	1561160	-	TCTATGAAAACAGTGAG	protein_coding	b1939	fliG	2015845	2015863	+	ATTGGCAGCGGCGAGGAT	0	0	1	1	ACAGTG&ATTGG	.((((.&)))).	-1.8	Yes	No	No
1237282_1	rRNA	b2589	rrlG	2728265	2728324	-	AGAGCACTGTTTCGGCAAGGGGGTCATCCCGACTTACCAACCCGATGCAAACTGCGAAT	protein_coding	b3049	glgS	3191807	3191855	-	GATATTCTGGCCGTTACTGGTAACATGGATGAAGAACATAGAACCTGG	2.96801e-126	6.87711e-126	1	1	AAGGGGGTCATCCCGACTTACCAACCCGATGCA&GGCCGTTACTGGTAACATGGATGAAGAACATAGAACCTG	.(((...((((((....((((((...((..((.&.))))....))))))...))))))...........))).	-15.8	No	Yes	No
1237381_1	protein_coding	b2474	tmcA	2594285	2594358	-	GGCGTTTCTGGCAACGCTGCGGTTTTGTGCTGGTGCGGATGGGTAATCATCGGGAAGCCAGCAGCGGTTGCTA	tRNA	b3799	proM	3982713	3982750	+	AAAATTCAAAAAGCAGTATTTCGGCGAGTAGCGCAGC	2.4009e-68	4.78077e-68	1	1	CGCTGCGGTTTTGTGCTGGTGCGGATGGGTA&AATTCAAAAAGCAGTATTTCGGCGAGTAGCGCAGC	.((((((.(....(((((((((...(((((.&.)))))....))).....))))))...).))))))	-22.2	Yes	No	No
1237515_1	protein_coding	b3210	arcB	3350669	3350740	-	TCACGACGTAGAAGTGCTGAAAGCGTGGGTGGCAAAAGCCACTAAAAAATGACCCCGGCTAGACCGGGGTG	5UTR	b3983	rplK	4178414	4178443	+	GAGGCGTTATTACCCAACTTGAGGAATTT	0	0	1	1	GAAGTGCTGAAAGCGTGGGTGGCAAAAGCCA&AGGCGTTATTACCCAACTTGAGGAATTT	.((((.((..(((..(((((((.....(((.&.)))....))))))).)))..)).))))	-17.1	No	Yes	No
1239067_1	protein_coding	b3161	mtr	3305394	3305425	-	TTTTGGTTTTGCATTGCTGGTAGCGTTTGTG	antisense_protein_coding	antisense-b4483	antisense-b4483	4023955	4023990	-	AGTTTATCCAGCCACGGCTCCAGCAATGTCATAAA	0	0	1	1	TGCATTGCTGGTAGCGTTTGTG&CCACGGCTCCAGCAATGTC	.((((((((((.(((...((((&.))))))))))))))))).	-21.9	No	Yes	No
123934_10	ncRNA	b4433	sdsR	1923154	1923187	-	ATTAATGCCAACTTTTAGCGCACGGCTCTCTCC	rRNA	b3970	rrlB	4170057	4170086	+	GAAGGGGGGACGGAGAAGGCTATGTTGGC	0	0	1	1	TGCCAACTTTTAGCGCACGGCTCTCTCC&AGGGGGGACGGAGAAGGCTATGTTGGC	.((((((...((((...(..((((((((&.))))))).)..)...)))).))))))	-22.3	No	Yes	No
123995_20,57503_4	rRNA	b3756	rrsC	3943340	3943384	+	ACCTCCTTACCTTAAAGAAGCGTTCTTTGCAGTGCTCACACAGA	3UTR	b3967	murI	4166543	4166595	+	TGTGGGCACTCGAAGATACGGATTCTTAACGTCGCAAGACGAAAAATGAATA	1.59963e-80	3.08035e-80	26	2	AAAGAAGCGTTCTTTGCAGTGCTCACAC&TGTGGGCACTCGAAGATACGGATTCTTA	.(((((.(((((((((.((((((((((.&)))))))))))))))).)))..))))).	-29	Yes	Yes	Yes
12399_43	ncRNA	b4698	mgrR	1622816	1622863	-	ATTAATGCCAACTTTTAGCGCACGGCTCTCTCC	protein_coding	b4294	insA_6	4518493	4518537	+	GAAGGGGGGACGGAGAAGGCTATGTTGGC	0	0	7	1	TGCCAACTTTTAGCGCACGGCTCTCTCC&AGGGGGGACGGAGAAGGCTATGTTGGC	.((((((...((((...(..((((((((&.))))))).)..)...)))).))))))	-22.3	Yes	No	No
1240869_1	ncRNA	b4585	chiX	507217	507286	+	AGTGACGGCATAATAATAAAAAAATGAAATTCCTCTTTGACGGGCCAATAGCGATATTGGCCATTTTTT	protein_coding	b3544	dppA	3707705	3707780	-	AAAACAAAAAAGGTCAGGCAGCGACAACCCACTGCAAAGGGTTAAAACAACAAACATCACAATTGGAGCAGAATA	0	0	2	1	CCTCTTTGACGGGCCAATAGCGATATTGGCCATTTTTT&CAAAAAAGGTCAGGCAGCGACAACCCACTGCAAAGGGT	.(((((((..(((......((....((((((.((((((&.))))))))))))...)).....)))....))))))).	-23.1	Yes	No	Yes
1241553_1	inter	int-3636	int-3636	2775517	2775534	-	CTGAAAAATAATAAAAA	protein_coding	b3860	dsbA	4043616	4043688	+	AAAAACTGCCGGAAGGCGTGAAGATGACTAAATACCACGTCAACTTCATGGGTGGTGACCTGGGCAAAGATC	2.2402e-09	3.23945e-09	1	1	CTGAAA&CTTCAT	.((((.&.)))).	-2.1	No	Yes	No
1242161_1	rRNA	b0201	rrsH	224457	224550	+	GCGGTGAAATGCGTAGAGATCTGGAGGAATACCGGTGGCGAAGGCGGCCCCCTGGACGAAGACTGACGCTCAGGTGCGAAAGCGTGGGGAGCA	protein_coding	b0464	acrR	486365	486394	+	TCTCCTGTGCCCCACGCTTCGTAATCCTG	0.00911291	0.0112229	1	1	TCAGGTGCGAAAGCGTGGGGAGCA&CTGTGCCCCACGCTTCGTAATCCTG	.((((((((.((((((((((.(((&.))).))))))))))))))..))))	-30.9	No	Yes	No
1242598_1	rRNA	b0204	rrlH	226619	226692	+	GAGCACTGTTTCGGCAAGGGGGTCATCCCGACTTACCAACCCGATGCAAACTGCGAATACCGGAGAATGTTAT	ncRNA	b4585	chiX	507216	507288	+	AAGTGACGGCATAATAATAAAAAAATGAAATTCCTCTTTGACGGGCCAATAGCGATATTGGCCATTTTTTTA	0	0	4	1	GGGTCATCCCGACTTACCAACCCGATGCAAACTGCGAATACCGGAGAATGTTAT&AATAATAAAAAAATGAAATTCCTCTTTGACGGGCCAATAGCGATATTGGCCA	.(((((...((.((......((((...((((..(.((((..((.....((((((&.))))))......))..)))))..)))).)))).....))))....))))).	-19.7	Yes	Yes	Yes
1242809_1	5UTR	b0452	tesB	475162	475201	-	ACTTTGGCTTGCTGCGGCAGCTTTGTTACTGGAGAGTTA	ncRNA	b4704	arrS	3657983	3658048	-	CGATTTAAATATCGAGTCTCCTTGTTTCGACTTAAGCTGGCAATTGGATTGCCAGCTTTCTTTTA	0	0	1	1	TTTGGCTTGCTGCGGCAGCTTTGTTACTGGAGAGTTA&CGAGTCTCCTTGTTTCGACTTAAGCTGGCAATTGGATTGCCAGC	.(((((...(((.(.((((((.(((((.(((((.((.&.)).)))))..))...)))..)))))).)...)))...))))).	-26.9	No	No	Yes
124293_2	protein_coding	b1708	nlpC	1792643	1792660	-	AAATGCCAGACTTTCTG	antisense_protein_coding	antisense-b3173	antisense-b3173	3320039	3320057	+	TTTCTGAGCATCACATAA	0	0	1	1	AATGCCAGAC&TTCTGAGCATC	.((((((((.&.)))).)))).	-9	No	Yes	No
124315_15	protein_coding	b0431	cyoB	450249	450307	-	TCTTCGTGGCGATGCCTTTCGTTATCGGTCTGATGAACCTGGTGGTTCCGCTGCAGAT	protein_coding	b0432	cyoA	451158	451197	-	GTTCTTCATCTACCCGGAACAGGGCATTGCTACCGTGAA	2.8139e-09	4.062e-09	1	1	TCTTCGTGGCGATGCCTTTCGTTATCGGTCTGATGAAC&CTTCATCTACCCGGAACAGGGCATTGCTACCGTGAA	((...(((((((((((((..(((.((((...((((((.&.))))))...))))))))))))))))))))...)).	-33.4	Yes	No	No
1243170_1	ncRNA	b4417	rybB	887977	888049	-	TGACGAGTGGCGGACGGGTGAGTAATGTCTGGGAAGCTGCCTGATGGAGGGGGATAACTACTGGAAAC	5UTR	b1838	pphA	1923104	1923146	-	CTTTTTTCACTTCCTGTACATTTACCCTGTCTGTCCATAGTGATTAATGTAGCACCGCCTAATTGCGGTGCTTTTTTTT	0	0	2	1	CGAGTGGCGGACGGGTGAGTAATGTCTGGGAAGCTGCCTGATGGAGGGGGATAACTACTGGAAA&CTTCCTGTACATTTACCCTGTCTGTCCATAGTGATTAATGTAGCACCGCCTAATTGCGGTGCTTT	.(((((.((.(.(((((.((..((........((((...((((((.((((.(((.(((.((((.&.)))).)))...))))))).))))))..))))........))..)))))))...).)).))))).	-37	Yes	No	Yes
12431_43	rRNA	b2591	rrsG	2730994	2731062	-	AAATGCCAGACTTTCTG	ncRNA	b4443	gcvB	2942822	2942901	+	TTTCTGAGCATCACATAA	0	0	9	1	AATGCCAGAC&TTCTGAGCATC	.((((((((.&.)))).)))).	-9	Yes	Yes	No
1243329_1	ncRNA	b4585	chiX	507216	507288	+	AAGTGACGGCATAATAATAAAAAAATGAAATTCCTCTTTGACGGGCCAATAGCGATATTGGCCATTTTTTTA	protein_coding	b4016	aceK	4218883	4218964	+	GAGATTGCGGAGAGCTTTTTTAACTCCGTGTACTGTCGGTTATTTGACCACCGCTCGCTTACTCCCGAGCGGCTTTTTATC	0	0	3	1	AAGTGACGGCATAATAATAAAAAAATGAAATTCCTCTTTGACGGGCCAATAGCGATATTGGCCATTTTT&GAGATTGCGGAGAGCTTTTTTAACTCCGTGTACTGTCGGTTATTTGACCACCGCTCGCTTA	(((((((((......(((((.................(((((((..((..(((....((.((.(((((.&))))).)).))..)))............))..))))))))))))......))).)))))).	-23.2	No	No	Yes
1244356_1	ncRNA	b4432	ryeA	1923104	1923176	+	AAAAGAGACCGAACACGATTCCTGTATTCGGTCCAGGGAAATGGCTCTTGGGAGAGAGCCGTGCGCTAAAAG	rRNA	b2589	rrlG	2726932	2726974	-	AATCCGGGTTGCGGACAGTGTCTGGTGGGTAGTTTGACTGGG	0	0	1	1	TCCAGGGAAATGGCTCTTGGGAGAGAGCCGTGCGCT&CGGGTTGCGGACAGTGTCTGGTGGGTAGTTTGACTGGG	.((((..((((.((((.(.(((.(..(((((((.(.&.).)).)))).)..).))).).)))).))))..)))).	-26.8	No	No	Yes
1244592_1	5UTR	b0023	rpsT	21108	21155	-	ATTGACAAAAGAAGGCTAAAAGGGCATATTCCTCGGCCTTTGAATTG	antisense_protein_coding	antisense-b1875	antisense-b1875	1959640	1959660	+	TCTGACAAAAGCTCGCCACA	0	0	1	1	AGGCTAAAAGGGCATATTCCTCGGC&TCTGACAAAAGCTCGCCA	.(((.....((((...((..((((.&.))))..)).))))))).	-9.3	Yes	No	No
124463_18	tRNA	b0202	ileV	225381	225440	+	GGCTTGTAGCTCAGGTGGTTAGAGCGCACCCCTGATAAGGGTGAGGTCGGTGGTTCAAG	protein_coding	b4016	aceK	4218915	4218943	+	CTGTCGGTTATTTGACCACCGCTCGCTT	0	0	6	1	AGGGTGAGGTCGGTGGTTCAAG&TTTGACCACCGCTCGCTT	.(((((((..((((((.((((.&.)))))))))))))))))	-21.5	No	Yes	Yes
1245590_1	protein_coding	b4676	yoaK	1878755	1878807	+	TTTTGATTGGTGATAACATGCGAATCGGTATTATTTTTCCGGTTGTAATCTT	protein_coding	b4016	aceK	4219252	4219315	+	TTGCCATTTTTGCTGCCGATCCACCAGACGGACGACGGCGAGTTATTTATTGATACCTGCCTG	3.28781e-30	5.58891e-30	1	1	GATTGGTGATAACATGCGAATCGGTATTATTTTTCCGGTTGTAAT&TTTGCTGCCGATCCACCAGACGGACGACGGCGAGTTATTTATTGATA	.((((((((((((.(((...((.((..........((((.((((.&.)))).)))).........)).)).....))).)))))).)))))).	-19.6	Yes	No	No
1246072_1	pseudogene	b4581	ybeM	657984	658046	+	GAATAATCGTCGTTGGCGAATTTTACGACTCTGACAGGAGGTGGCAATGCTGGTTGCCGCAG	ncRNA	b3864	spf	4049949	4049987	+	ATCGGATTTGGCTGAATATTTTAGCCGCCCCAGTCAGT	0	0	1	1	TCTGACAGGAGGTGGCAATGCTGGTTGCCGC&TTGGCTGAATATTTTAGCCGCCCCAGTCAGT	.(((((.((.((((((((........((((.&.))))........)).)))))))).))))).	-26.2	No	No	Yes
1246836_1	ncRNA	b4585	chiX	507235	507288	+	AAAAAATGAAATTCCTCTTTGACGGGCCAATAGCGATATTGGCCATTTTTTTA	protein_coding	b3398	yrfF	3526534	3526568	+	AAAGTGCGATCCAGACGGCGTCAGCTGCCCTGGA	4.90557e-41	8.8225e-41	1	1	CGGGCCAATAGCGATATTGGCCA&CGGCGTCAGCTGCCCT	.((((....((((((....(((.&.)))))).))))))).	-15.2	No	Yes	No
1246872_1	5UTR	b0654	gltJ	686703	686738	-	AATACGCTGGGTAACAATCTTCGAGGGTAGCAGTT	ncRNA	b4452	gadY	3664846	3664891	+	AAAGTTATATTTAACTTACTGAGAGCACAAAGTTTCCCGTGCCAA	0	0	1	1	CGCTGGGTAACAATCTTCGAGGGTAGC&ACTTACTGAGAGCACAAAGTTTCCCGTGCC	.((((((.(((....(((..((..((.&.))..))..)))......))).)))).)).	-13.5	No	Yes	No
1247084_1	protein_coding	b1110	ycfJ	1168120	1168145	+	TTGAATAACAAAGTATAACAAGGCT	ncRNA	b4704	arrS	3657986	3658054	-	GTAATCCGATTTAAATATCGAGTCTCCTTGTTTCGACTTAAGCTGGCAATTGGATTGCCAGCTTTCTT	0	0	1	1	AAAGTATAACAAGGC&TCCTTGTTTCGACTTA	.((((..(((((((.&.)))))))...)))).	-10.4	No	Yes	No
1247308_1	ncRNA	b4704	arrS	3657983	3658054	-	GTAATCCGATTTAAATATCGAGTCTCCTTGTTTCGACTTAAGCTGGCAATTGGATTGCCAGCTTTCTTTTA	protein_coding	b4037	malM	4250444	4250533	+	TTTATCAGCAGTGTAAAAGGCAAGGGGTAATTACGCCCCACAGTGCTGATTTTGCAACAACTGGTGCGTCTCCTGGCGCACCTTTTTTT	0	0	3	1	CGAGTCTCCTTGTTTCGACTTAAGCTGGCAATTGGATTGCCAGCTTTCTTTTA&GTAAAAGGCAAGGGGTAATTACGCCCCACAGTGCTGATTTTGCAACAACTGGTGCGTCTCC	.(((.(.(((((((.(((....((((((......(((((((..((((((((((&.))))))).))).))))))).....)))....)))....))).)))))..))...).))).	-25.2	Yes	Yes	Yes
1247684_1	ncRNA	b4444	omrA	2976102	2976167	-	ATTATTCGGTACGCTCTTCGTACCCTGTCTCTTGCACCAACCTGCGCGGATGCGCAGGTTTTTTT	rRNA	b4009	rrlE	4210792	4210857	+	AAATTAGCGGATGACTTGTGGCTGGGGGTGAAAGGCCAATCAAACCGGGAGATAGCTGGTTCTCC	0	0	1	1	CGTACCCTGTCTCTTGCACCAACCTGCGCGGATGCGCAGGTTTTTTT&CGGATGACTTGTGGCTGGGGGTGAAAGGCCAATCAAACCGGGAGATAGCTGGTTCT	.(.(((((((((((((((((..((.((.......((((((((.(((.&.))).)))))))))).)).))))...............))))))))))..))).).	-29.5	No	Yes	No
1247900_1	5UTR	b1976	mtfA	2043601	2043632	+	GTCCCTGTCCGTGCAATTTTGTTCAAGTGAC	5UTR	b2344	fadL	2461233	2461256	+	ACCCTACACTTCGCGCTCCTGTT	1.13561e-10	1.6659e-10	1	1	CGTGCAATTTTGTTCAAGTGA&ACACTTCGCGCT	.((((..........(((((.&.))))).)))).	-6.7	No	Yes	No
1248477_1	rRNA	b0204	rrlH	227783	227806	+	TTTATATTTTACCCATTTAGGGCTGATTTATTACTACACACAGCAGTGC	tRNA	b0206	aspU	228941	228984	+	ATTGCTGTGTGTAGTCTTTGCCCATCTCCCA	0	0	1	1	AGGGCTGATTTATTACTACACACAGCAGTG&ATTGCTGTGTGTAGTCTTTGCCCA	.((((.........(((((((((((((((.&)))))))))))))))....)))).	-29.8	No	Yes	No
12484_193	5UTR	b1040	csgD	1103277	1103326	-	TTTATATTTTACCCATTTAGGGCTGATTTATTACTACACACAGCAGTGC	ncRNA	b4431	rprA	1770430	1770461	+	ATTGCTGTGTGTAGTCTTTGCCCATCTCCCA	1.17669e-26	1.80129e-26	240	1	AGGGCTGATTTATTACTACACACAGCAGTG&ATTGCTGTGTGTAGTCTTTGCCCA	.((((.........(((((((((((((((.&)))))))))))))))....)))).	-29.8	Yes	Yes	Yes
1248850_1	3UTR	b0001	thrL	155	268	+	CAGACAGATAAAAATTACAGAGTACACAACATCCATGAAACGCATTAGCACCACCATTACCACCACCATCACCATTACCACAGGTAACGGTGCGGGCTGACGCGTACAGGAAA	ncRNA	b4704	arrS	3657986	3658054	-	GTAATCCGATTTAAATATCGAGTCTCCTTGTTTCGACTTAAGCTGGCAATTGGATTGCCAGCTTTCTT	0	0	4	1	AGGTAACGGTGCGGGCTGACGCGTACAGGAA&CTCCTTGTTTCGACTTAAGCTGGCAATTGGATTGCCA	.((((((..(((.((((....((.((((((.&.)))).))..)).....)))).)))....).))))).	-23	Yes	No	Yes
124897_15	protein_coding	b2156	lysP	2247031	2247065	-	TAAGTTTCCTCCCTTCCTTGCTAAGCCCTCTCAA	protein_coding	b4012	yjaB	4214070	4214142	-	ATGACTAAAAGGAGAGAAAATGGTTATTAGTATTCGCCGCTCACGGCATGAGGAAGGGGAGGAACTCGTTGC	0.0075143	0.00929994	2	1	AAGTTTCCTCCCTTCCTTGCTAAGCCCTCTCA&GGAGAGAAAATGGTTATTAGTATTCGCCGCTCACGGCATGAGGAAGGGGAGGAACTC	.((((((.(((((((((((((((((((((((.&.))))).....)))..)))))..................)))))))))).)))))).	-31.8	Yes	No	No
1248990_1,273149_1	3UTR	b3512	gadE	3658992	3659011	+	TTTATTCCCCTGGTATGTG	rRNA	b3758	rrlC	3943871	3943901	+	GTTAATGAGGCGAACCGGGGGAACTGAAAC	1.15738e-106	2.57291e-106	1	2	TTTATTCCCCTGGTATGTG&GGCGAACCGGGGGAACTGAAA	((((((((((((((.(((.&.))).)))))))))).)))).	-21.2	No	No	Yes
1249546_1	antisense_protein_coding	antisense-b0615	antisense-b0615	648385	648402	+	CACCGGAAGCACCACGC	rRNA	b3275	rrlD	3425853	3425876	-	CAAACTGCGAATACCGGAGAATG	0	0	1	1	ACCGGAAGCAC&CTGCGAATACCGGA	.((((..(((.&.))).....)))).	-8.8	No	Yes	No
1250098_1	protein_coding	b0118	acnB	133183	133225	+	ATGCCGCTTGATATGCCGGAATCCGTTCTGGTGCGCTTCAAA	inter	int-1697	int-1697	3496960	3496989	-	AAAAAATAAAAACAAAAAATAAAACAAAA	3.67309e-06	5.01848e-06	6	1	CGTTC&AAACA	.(((.&.))).	-0.7	No	No	Yes
125026_8	5UTR	b0929	ompF	987012	987039	-	AGAACTTATTGACGGCAGTGGCAGGTG	protein_coding	b1154	stfP	1207696	1207726	+	TACTTACCGCACTTCGCGCGCTGCTGTTAA	0	0	1	1	ATTGACGGCAGTGGCAGGTG&GCACTTCGCGCGCTGCTGTTAA	.(((((((((((((((((((&.))))).)).))))))))))))	-24.5	Yes	No	No
1252331_1	ncRNA	b4432	ryeA	1923066	1923125	+	AAGTCAGCGAAGGAAATGCTTCTGGCTTTTAACAGATAAAAAGAGACCGAACACGATTC	protein_coding	b3321	rpsJ	3453153	3453227	-	ATCGTCTGATCGATCAAGCAACCGCGGAAATCGTCGAGACTGCCAAGCGCACTGGTGCGCAGGTCCGTGGTCCG	0	0	1	1	AGCGAAGGAAATGCTTCTGGCTTTTAACAGATAAAAAGAGACCGAACACGATTC&TGATCGATCAAGCAACCGCGGAAATCGTCGAGACTGCCAAGCGCACTGGTGCGCAGGTCCGTGGTC	.((.(.(((..(((.((.(((.(((..(((.......((..(((....(((((.&.)))))............)))...)).......)))..))).)).).))...)))..))).).)).	-18.8	No	Yes	No
1253237_1	protein_coding	b1271	yciK	1329112	1329150	-	ACTGGCAGCGCGACAGACAACGTCGTTGAGGAGTAGCC	ncRNA	b4432	ryeA	1923084	1923149	+	CTTCTGGCTTTTAACAGATAAAAAGAGACCGAACACGATTCCTGTATTCGGTCCAGGGAAATGGC	1.56938e-55	2.98485e-55	1	1	ACTGGCAGCGCGACAGACAACGTCGTTGAGGAGTAGCC&TGGCTTTTAACAGATAAAAAGAGACCGAACACGATTCCTGTATTCGGTCCAGG	.((((.(.((..((((....(((.(((..((...((((&.))))...................)).))))))....))))...)).))))).	-18.4	No	No	Yes
1253528_1	ncRNA	b4432	ryeA	1923084	1923147	+	CTTCTGGCTTTTAACAGATAAAAAGAGACCGAACACGATTCCTGTATTCGGTCCAGGGAAATG	protein_coding	b1880	flhB	1966009	1966035	-	GCCCGTCGATTGTCGGGCATGCTCTC	3.04234e-44	5.57304e-44	1	1	AAGAGACCGAACACGATTCCTGTATTCGGTCCAGGGA&GCCCGTCGATTGTCGGGCATGCTCTC	.((((.............((((((.((((.(..(((.&.)))))))).)).))))....)))).	-12.8	No	No	Yes
1253869_1	antisense_protein_coding	antisense-b1645	antisense-b1645	1723971	1723994	-	TCAAGTGTGGCCGCCAGTGATTT	rRNA	b3274	rrfD	3423771	3423788	-	TTGCCTGGCGGCCGTAG	0.000769668	0.000994381	1	1	GTGGCCGCCAGT&CCTGGCGGCCGT	.((((((((((.&.)))))))))).	-21.7	Yes	No	No
1254159_1	5UTR	b0440	hupB	461384	461437	+	TAACTGCTGCGCGTTCGTACCTTGAAGGATTCAAGTGCGATATAAATTATAAA	inter	int-1687-1	int-1687-1	3469950	3469967	+	TTAAAAATAAGAAAAAA	0	0	1	1	CCTTGA&ATAAGA	.((((.&.)))).	-1.2	No	Yes	No
125471_8	antisense_protein_coding	antisense-b0600	antisense-b0600	634006	634030	-	AATGCGGTGGTTGCAGTGCCATAC	protein_coding	b3084	rlmG	3234792	3234817	-	TTTCGGCAACTGCACCACTATTGCG	0	0	1	1	TGCGGTGGTTGCAGTGCCA&CGGCAACTGCACCACTATTGCG	.(((((((((((((((((.&.)))).)))))..)))))))).	-24	Yes	No	No
1255101_1	inter	int-1767	int-1767	3657983	3658055	-	TGTAATCCGATTTAAATATCGAGTCTCCTTGTTTCGACTTAAGCTGGCAATTGGATTGCCAGCTTTCTTTTA	protein_coding	b3766	ilvL	3950302	3950401	+	AGATGCAAGAAAAGACAAAATGACAGCCCTTCTACGAGTGATTAGCCTGGTCGTGATTAGCGTGGTGGTGATTATTATCCCACCGTGCGGGGCTGCACT	0	0	4	1	TGTAATCCGATTTAAATATCGAGTCTCCTTGTTTCGACTTAAGCTGGCAATTGGATTGCCAGCTTTCTTTTA&AAAATGACAGCCCTTCTACGAGTGATTAGCCTGGTCGTGATTAGCGTGGTGGTGATTATTATCCCACCGTGCGGGGCTGCAC	((((.((((............((((.((..(((.(((((...(((((((.(((........(((.((.(((.&.))).)).))).......))).)).)))))..))))).))).........)).))))..............))))..)))).	-26.7	Yes	Yes	No
1255140_1	ncRNA	b4585	chiX	507217	507286	+	AGTGACGGCATAATAATAAAAAAATGAAATTCCTCTTTGACGGGCCAATAGCGATATTGGCCATTTTTT	tRNA	b1986	asnU	2059878	2059910	+	GGACTGTTAATCCGTATGTCACTGGTTCGAGT	0	0	1	1	ACGGGCCAATAGCGATATTGGC&TCCGTATGTCACTGGTTCGA	.((((((...((.((((((((.&.))).))))).)))))))).	-14.6	No	No	Yes
1255858_1	ncRNA	b4408	csrB	2924250	2924314	-	CATCGGGGTGGTGTGAGCAGGAAGCAATAGTTCAGGATGAACGATTGGCCGCAAGGCCAGAGGA	protein_coding	b3251	mreB	3400992	3401053	-	ACTTGTCCATTGACCTGGGTACTGCGAATACCCTCATTTATGTAAAAGGACAAGGCATCGT	5.91138e-61	1.14757e-60	1	1	GGGGTGGTGTGAGCAGGAAGCAATAGTTCAGGATGAACGATTGGCCGCAAGG&ACTTGTCCATTGACCTGGGTACTGCGAATACCCTCA	.(((.(((((..((((..........((((((.....(((.(((..(((((.&.))))))))))).))))))..))))..)))))))).	-26.9	Yes	No	No
1256500_1	ncRNA	b4704	arrS	3657986	3658048	-	CGATTTAAATATCGAGTCTCCTTGTTTCGACTTAAGCTGGCAATTGGATTGCCAGCTTTCTT	protein_coding	b4246	pyrL	4472489	4472552	-	CAATTTGCCGGGAGGATGTATGGTTCAGTGTGTTCGACATTTTGTCTTACCGCGTCTGAAAAA	0	0	1	1	CGATTTAAATATCGAGTCTCCTTGTTTCGACTTAAGCTGGCAATTGG&CAATTTGCCGGGAGGATGTATGGTTCAGTGTGTTCGACATTTTGTCT	.(((..((((.(((((.(.(.(((..(((((((...((((((((((.&))))).)))))...)).)).)))..))).).)))))).)))).))).	-21.9	No	No	Yes
125712_17	protein_coding	b1845	ptrB	1928796	1928863	-	GTTTCAACCAGAAAGAACAATAACATGCTACCAAAAGCCGCCCGCATTCCCCACGCCATGACGCTTC	protein_coding	b4167	nnr	4394855	4394902	+	ACGGCACGGCGGGGGCTATTCGTATGACGGGGGAAGCGGCGCTGCGT	0.00631637	0.0078549	3	1	AGCCGCCCGCATTCCCCACGCCATGACGCTTC&GGGGGCTATTCGTATGACGGGGGAAGCGGCGCTGCG	.((.((((((.((((((.((.((((..(((((&.)))))......)))).)))))))))))).)).)).	-32.2	No	Yes	No
1257183_1	protein_coding	b1015	putP	1079286	1079311	+	ATTTTTTGGAGACTTTAGATGGCTA	protein_coding	b4394	yjjX	4633450	4633524	-	GATTGAAGCTGGCATCGATGGTGACAGCACTTTCAGTTGGGTGGTGATTGAAAACGCCAGCCAGCGCGGCGAGG	1.69845e-05	2.29137e-05	1	1	TTTGGAGACTTTAGATGGCT&TGGCATCGATGGTGACAGC	.(((...(((...((((.(.&.).))))...)))..))).	-9.7	No	No	Yes
1257306_1	protein_coding	b0953	rmf	1015875	1015924	+	GGCCTGATTCTGTCTCTTTAAAAAGAAACCTCCGCATTGCGGAGGTTTC	ncRNA	b4445	omrB	2976361	2976384	-	CCAGAGGTATTGATAGGTGAAGT	0	0	1	1	CCTGATTCTGTCTCTTTAAAAAGAAACCTCC&AGAGGTATTGATAGGTGAAGT	.((...((((((..........((.(((((.&.))))).))))))))...)).	-10.6	Yes	No	No
125739_2	protein_coding	b0698	kdpA	727572	727592	-	TACGGCATGATGCTGTTTGT	protein_coding	b3543	dppB	3705335	3705357	-	TCTTCTGGTGGGGCATGATGCT	0	0	2	1	CGGCATGATGCTGTT&TGGGGCATGATGCT	.(((((.(((((.(.&.).))))).)))))	-14.5	No	No	Yes
1257550_1	ncRNA	b4585	chiX	507216	507280	+	AAGTGACGGCATAATAATAAAAAAATGAAATTCCTCTTTGACGGGCCAATAGCGATATTGGCCA	pseudogene	b2092	gatC	2173084	2173161	-	GCAAACTATTGGTTTGCACACCCAACTGGCGGCTAATGCTGGGGCGTTAAAAGCCGGGGGTATGGTGGCTTCAATGG	0	0	1	1	GTGACGGCATAATAATAAAAAAATGAAATTCCTCTTTGACGGGCCAATAGCGATATTGGCCA&CGGCTAATGCTGGGGCGTTAAAAGCCGGGGGTATGGTGGCTTCAA	.(((.(.(((.(((...............(((((((((((..(((..((((...(((((((.&.))))))))))).)))))))))....)))))))).))).).))).	-28.1	No	Yes	No
1257621_1	ncRNA	b4445	omrB	2976360	2976386	-	TCCCAGAGGTATTGATAGGTGAAGTC	protein_coding	b4466	yghJ	3119026	3119091	-	AAGAAATCGCTTTTAGCGGCTATTTTGAGCGCAACCCTGTTAGCCGGTTGTGATGGCGGTGGTTC	5.57302e-178	1.39048e-177	1	1	TCCCAGAGGTATTGATAGGT&CCCTGTTAGCCGGTTGTGAT	((.(((.(((..(((((((.&.))))))))))..))).)).	-11.7	Yes	No	No
1258058_1	protein_coding	b2426	ucpA	2544071	2544092	-	ATTCGCGTTAACGCCATTTGC	protein_coding	b2976	glcB	3121643	3121673	-	ATTACACGCCTGGCGTTTACGCGAAAAAGA	0.0117787	0.0144114	1	1	ATTCGCGTTAACGCCATTTGC&CGCCTGGCGTTTACGCGAAA	.(((((((.(((((((...((&.)).))))))).))))))).	-23.2	No	Yes	No
1258280_1	rRNA	b3274	rrfD	3423754	3423790	-	ATTTGCCTGGCGGCCGTAGCGCGGTGGTCCCACCTG	rRNA	b4010	rrfE	4213081	4213159	+	CGAACTCAGAAGTGAAACGCCGTAGCGCCGATGGTAGTGTGGGGTCTCCCCATGCGAGAGTAGGGAACTGCCAGGCAT	0	0	1	1	TTGCCTGGCGGCCGTAGCGCGGTGGTCCCACCTG&GTAGTGTGGGGTCTCCCCATGCGAGAGTAGGGAACTGCCAGGCAT	.((((((((((((.(((((.((.(((((((((((&.))).))))))...)))).))).....)).))..)))))))))).	-39.5	Yes	No	No
1258751_1	antisense_protein_coding	antisense-b2631	antisense-b2631	2767326	2767380	-	ACTGGTTCGTTTAGAAAGAAGAGTTTCAAAAATCCATTGACAGGACTTGGCGTA	ncRNA	b3864	spf	4049949	4049985	+	ATCGGATTTGGCTGAATATTTTAGCCGCCCCAGTCA	6.13979e-69	1.22453e-68	1	1	ACTGGTTCGTTTAGAAAGAAGAGTTTCAAAAATCCA&CGGATTTGGCTGAATATTTTAGCCGCCCCAGTC	(((((..((.((((((.....((((....((((((.&.)))))))))).....)))))).))..))))).	-17.8	Yes	No	No
1258927_1	5UTR	b1040	csgD	1103277	1103323	-	ATATTTTACCCATTTAGGGCTGATTTATTACTACACACAGCAGTGC	ncRNA	b4704	arrS	3657983	3658054	-	GTAATCCGATTTAAATATCGAGTCTCCTTGTTTCGACTTAAGCTGGCAATTGGATTGCCAGCTTTCTTTTA	0	0	3	1	TAGGGCTGATTTATTACTACACACAGCA&AGCTGGCAATTGGATTGCCAGCTTTC	.(((((((....(((........((((.&.)))).......)))...))))))).	-13	No	Yes	Yes
1259198_1	rRNA	b0201	rrsH	224616	224635	+	GCGTGGCTTCCGGAGCTAA	3UTR	b0811	glnH	847121	847186	-	AAACCCGCTCCGGGGCCATTAATTACCCTGAATTTGATTATTTACACCACGGTAACAGGAACAAC	1.52234e-09	2.20733e-09	2	1	CGTGGCTTCCGGAGCT&CGCTCCGGGGCCATT	.(((((.((((((((.&.))))))))))))).	-24.3	No	No	Yes
1259199_1	3UTR	b0811	glnH	847121	847186	-	AAACCCGCTCCGGGGCCATTAATTACCCTGAATTTGATTATTTACACCACGGTAACAGGAACAAC	rRNA	b2591	rrsG	2730293	2730312	-	GGCGTGGCTTCCGGAGCTA	5.69859e-10	8.29962e-10	1	1	CGCTCCGGGGCCATT&CGTGGCTTCCGGAGCT	.(((((((((((((.&.)))))).))))))).	-24.3	No	No	Yes
1259367_1	antisense_protein_coding	antisense-b2246	antisense-b2246	2358907	2358924	+	CAGAGTGAAAATAATCA	3UTR	b4171	miaA	4400209	4400270	+	CAATTGAGACGTATCGTGCGCAATTTTTTCAGAATCGAAAGGTTCAAAGTACAAATAAGCA	0	0	1	1	GTGAAAAT&TTTTTCAG	.((((((.&.)))))).	-3.7	No	No	Yes
126038_20	protein_coding	b0881	clpS	923091	923128	+	ATTGATGCTCGCTGTTCACTACCAGGGGAAGGCCATT	protein_coding	b2587	kgtP	2724509	2724536	-	CCTTCTTCTGGTATGTGACCTTGATGG	1.87949e-42	3.41374e-42	1	1	CTCGCTGTTCACTACCAGGGGAAGGC&CCTTCTTCTGGTATGTGACCTTGAT	.(((..(.(((((((((((((((((.&))))))))))))).)))).).))).	-25.8	No	Yes	No
1260548_1	5UTR	b3894	fdoG	4085824	4085879	-	TATTTTGGTTCCTGTGCTGGCGGCTAT	5UTR	b4376	osmY	4611162	4611227	+	TAAAATGCTAGCTGTACCAGGAACCACCTCCTTAGCCTGTGTAATCT	1.37829e-281	3.87999e-281	1	1	TTGGTTCCTGTGCTGGCGGCTAT&CTAGCTGTACCAGGAACCAC	.(((((((((.(...(((((((.&.))))))).)))))))))).	-24.1	No	No	Yes
12605_33	protein_coding	b2070	yegI	2149705	2149732	-	TATTTTGGTTCCTGTGCTGGCGGCTAT	ncRNA	b4438	cyaR	2167131	2167178	+	TAAAATGCTAGCTGTACCAGGAACCACCTCCTTAGCCTGTGTAATCT	2.54031e-16	3.93661e-16	1	1	TTGGTTCCTGTGCTGGCGGCTAT&CTAGCTGTACCAGGAACCAC	.(((((((((.(...(((((((.&.))))))).)))))))))).	-24.1	Yes	No	No
12608_317	protein_coding	b3709	tnaB	3890435	3890452	+	TCCCGTCGGCTCCAGTT	rRNA	b3758	rrlC	3944318	3944339	+	AGGGGAGCCGAAGGGAAACCG	2.49596e-16	3.56515e-16	2	1	TCCCGTCGGCTCCA&GGGAGCCGAAGGGAA	((((.((((((((.&.)))))))).)))).	-24.7	No	Yes	No
1261335_1,169998_1	antisense_ncRNA	antisense-b4698	antisense-b4698	1622784	1622860	+	TGTGTACAAGGGGCCTGATTTTTATGACGGCGAAAAAAAACCGCCAGTAAACCGGCGGTGAATGCTTGCATGGATA	ncRNA	b3864	spf	4049901	4049946	+	GGGTACAGAGGTAAGATGTTCTATCTTTCAGACCTTTTACTTCAC	0	0	1	2	TGTGTACAAGGGGCCTGATTTTTATGACGGCGAAAAAAAACCGCCAGTAAACCG&GGGTACAGAGGTAAGATGTTCTATCTTTCAGACCTTTTACTTCAC	.(((...((((((.((((....((.((((..........(((....(((..((.&)).)))...)))....)))).))....)))).))))))....)))	-16.8	No	No	Yes
1261865_1	3UTR	b0729	sucD	765064	765114	+	AATAGCCCTCGCCGCTTCCCTCTACAGGAATGGCGAAGGGCTGTCGGTTT	protein_coding	b0874	ybjE	914165	914182	-	TTTTTTAATGATCTGGC	2.44532e-63	4.79419e-63	1	1	CGCCGCTTCC&TGATCTGGC	.((((..((.&.))..))))	-5.5	No	Yes	No
1262678_1	protein_coding	b0446	cof	468161	468232	+	AATCAGGCTGTCTCTCACTATTTGACGCACTGGCTGGACTATCCACATCTACCTTATTCCCCCGAATAACG	inter	int-3361-1	int-3361-1	2278489	2278552	+	CATATATCGGGGGAATGATAGATTTGTGGTTGACATGCATCAACAAAGGAAGCCTTTTAGCTT	2.10241e-224	5.57547e-224	1	1	CAGGCTGTCTCTCACTATTTGACGCACTGGCTGGACTATCCACATCTACCTTATTCCCCCGAA&ATCGGGGGAATGATAGATTTGTGGTTGACATGCATCAACAAAGGAAGCCTT	.(((((.((.((......((((.(((.((....(((((..((.(((((..((((((((((((.&.))))))))))))))))).)))))))..))))).))))...))))))))).	-41.2	No	No	Yes
126301_20	protein_coding	b0145	dksA	160547	160600	-	AAGAAGGGCAAAACCGTAAAACATCGTCCCTGAGTATTCTCGCCATCGCTGGG	ncRNA	b4450	arcZ	3350642	3350681	+	TTCCCTGGTGTTGGCGCAGTATTCGCGCACCCCGGTCTA	2.34649e-136	5.51705e-136	4	1	AAGAAGGGCAAAACCGTAAAACATCGTCCCTGAGTATTCTCGCCATCGCTGGG&CCCTGGTGTTGGCGCAGTATTCGCGCACCCCGGTCTA	.(((.(((.................((.(.((((((((..(((((.(((((((&.))))))).))))).)))))))).).)))))..))).	-27.8	No	No	Yes
1263456_1	5UTR	b3357	crp	3485999	3486030	+	ACATTACCGTGCAGTACAGTTGATAGCCCCT	antisense_ncRNA	antisense-b4452	antisense-b4452	3664911	3664985	-	AGTTTTACTCAGACATAAAAAAAACCCGGCATAGGGGACCGGGAAGAGGATAGTCTGCCGTCTCCAGACTAATA	0	0	1	1	CCGTGCAGTACAGTTGATAGCCCCT&TAGGGGACCGGGAAGAGGATAGTCTGCCGT	.((.((((.((.(((.....(((((&.)))))...........))).)))))))).	-14.5	No	No	Yes
126345_20	5UTR	b2412	zipA	2531252	2531273	-	AAGAAGGGCAAAACCGTAAAACATCGTCCCTGAGTATTCTCGCCATCGCTGGG	protein_coding	b2535	csiE	2665519	2665537	+	TTCCCTGGTGTTGGCGCAGTATTCGCGCACCCCGGTCTA	1.43185e-39	2.55433e-39	4	1	AAGAAGGGCAAAACCGTAAAACATCGTCCCTGAGTATTCTCGCCATCGCTGGG&CCCTGGTGTTGGCGCAGTATTCGCGCACCCCGGTCTA	.(((.(((.................((.(.((((((((..(((((.(((((((&.))))))).))))).)))))))).).)))))..))).	-27.8	No	No	Yes
1263622_1	protein_coding	b0929	ompF	986168	986190	-	AAATTTACAAACACCAGCGGCT	protein_coding	b4069	acs	4287351	4287368	-	AGCCAAATTCACAAACA	6.50337e-10	9.4607e-10	1	1	CGGCT&AGCCA	.((((&)))).	-5.7	No	Yes	No
1263767_1	rRNA	b3275	rrlD	3425853	3425894	-	CGACTTACCAACCCGATGCAAACTGCGAATACCGGAGAATG	protein_coding	b3319	rplD	3452040	3452110	-	GTGGCGCCAGAAAGGCACCGGCCGTGCGCGTTCTGGTTCTATCAAGAGCCCGATCTGGCGTTCTGGTGGC	7.4087e-18	1.1608e-17	1	1	CTTACCAACCCGATGCAAACTGCGAATACCGGA&ACCGGCCGTGCGCGTTCTGGTTCTATCAAGAGCCCGATCTGGCGTTCTGGTGGC	.((((((((((((..(((((.(((....((((.&.)))).....)))))).))..)).................)).))..)))))).	-17.2	Yes	No	No
1263774_1	rRNA	b3275	rrlD	3425851	3425894	-	CGACTTACCAACCCGATGCAAACTGCGAATACCGGAGAATGTT	tRNA	b3976	thrU	4175403	4175434	+	AGGTAGAGCAACTGACTTGTAATCAGTAGGT	0	0	1	1	GACTTACCAACCCGATGCAAACTGCGAATACCG&AGGTAGAGCAACTGACTTGTAATCAGTAGGT	.((((((.....(((..((...(((...((((.&.))))..)))..))..)))......))))))	-13.3	Yes	No	No
1264302_1	ncRNA	b4432	ryeA	1923077	1923143	+	GGAAATGCTTCTGGCTTTTAACAGATAAAAAGAGACCGAACACGATTCCTGTATTCGGTCCAGGGA	inter	int-1443-1	int-1443-1	2947576	2947606	+	AAATTTGATGAAGTAAAAGCAGTACGGTGA	0	0	1	1	GGAAATGCTTCTGGCTTTTAACAGATA&AATTTGATGAAGTAAAAGCAGTACG	(....(((((...(((((...(((((.&.)))))..)))))..)))))...).	-10.6	No	Yes	No
1264307_1	tRNA	b1984	asnW	2058027	2058097	-	TGTAGTTCAGTCGGTAGAACGGCGGACTGTTAATCCGTATGTCACTGGTTCGAGTCCAGTCAGAGGAGCC	inter	int-1443-1	int-1443-1	2947576	2947605	+	AAATTTGATGAAGTAAAAGCAGTACGGTG	0	0	1	1	TCCGTATGTCACTGGTTCGAGTCCAGTCAGAG&ATTTGATGAAGTAAAAGCAGTACGGT	.((((.....((((.((..(.(...((((((.&.))))))..).)..)).)))))))).	-12.7	No	Yes	No
1264327_1	ncRNA	b4585	chiX	507226	507287	+	ATAATAATAAAAAAATGAAATTCCTCTTTGACGGGCCAATAGCGATATTGGCCATTTTTTT	protein_coding	b0876	ybjD	917742	917797	+	AATTTGCCCGCCGAATGGGGATTGAATGGCATGTACTGGTCGATGGCGATGAAGC	3.4563e-20	5.51202e-20	1	1	AATGAAATTCCTCTTTGACGGGCCAATA&AATTTGCCCGCCGAATGGGGATTGAATG	.((..(((((((.((((.(((((.(((.&.))).))))).)))).)))))))..)).	-22	No	Yes	No
1264833_1	3UTR	b1874	cutC	1958477	1958519	-	TTTTTACCGTTGCATCATGTCGCCCAATATGATGCTTGCTCG	tRNA	b3978	glyT	4175642	4175695	+	AATGAAAATCAGGTAGCCGAGTTCCAGGATGCGGGCATCGTATAATGGCTATT	0	0	1	1	CGCCCAATATGATGCTTGCTCG&GGATGCGGGCATCGTATAATGGCT	.(((..(((((((((((((((.&.)).)))))))))))))...))).	-24.6	No	Yes	No
1265029_1	protein_coding	b1125	potB	1183812	1183856	-	ATTATTGCCGGATGTCTGCTGGTGATGCTGCCAGCGATGGGCCT	protein_coding	b3686	ibpB	3866503	3866523	-	ACCCATCGCAGCGCAGCGTA	7.11424e-16	1.09793e-15	2	1	GATGCTGCCAGCGATGGGC&ACCCATCGCAGCGCAGCGTA	.((((((((.((((((((.&.)))))))).).))))))).	-28	No	No	Yes
12651_43	protein_coding	b0401	brnQ	420838	420860	+	GTGGTGATGGTGGTTCTGGCCA	ncRNA	b4438	cyaR	2167114	2167166	+	CTGAAAAACATAACCCATAAAATGCTAGCTGTACCAGGAACCACCTCCTTAG	7.83806e-188	1.98196e-187	3	1	GTGGTGATGGTGGTTCTGGCC&TGCTAGCTGTACCAGGAACCACC	(((((..(((((...(((((.&.)))))...)))))...))))).	-21	Yes	No	No
1265222_1	ncRNA	b4408	csrB	2924181	2924253	-	GGAAAAGTTGTCAAGGATGAGCAGGGAGCAACAAAAGTAGCTGGAATGCTGCGAAACGAACCGGGAGCGCTG	antisense_pseudogene	antisense-b4652	antisense-b4652	3769942	3769989	-	ATCTATTGCGATGATGGCTTTATTATCTGAAGGATGACAGTCACATT	0.0164263	0.0199126	1	1	AGTTGTCAAGGATGAGCAGGGAGCAACAAAAGTAGCTGGAA&ATCTATTGCGATGATGGCTTTATTATCTGAAGGATGACA	.((((((..((((((.....((((.......((((.((((.&.)))))))).......))))..))))))....)))))).	-19.1	No	Yes	No
1265233_1	ncRNA	b4704	arrS	3657991	3658054	-	GTAATCCGATTTAAATATCGAGTCTCCTTGTTTCGACTTAAGCTGGCAATTGGATTGCCAGCT	tRNA	b3798	leuT	3982608	3982672	+	AAGGTGGCGGAATTGGTAGACGCGCTAGCTTCAGGTGTTAGTGTCCTTACGGACGTGGGGGTTC	0	0	1	1	CGAGTCTCCTTGTTTCGACTTAAGCTGGCAATTGGATTGCCAGCT&AAGGTGGCGGAATTGGTAGACGCGCTAGCTTCAGGTGTTAGTGTCCTTACGGACGTGGGGGTTC	.((((((((.((.((((((((((((((((...(.((((((((.((&.)).)))))..))).).......)))))))).)))).............)))))).))))))))	-29.7	No	No	Yes
1266173_1	protein_coding	b2042	wcaN	2114270	2114302	-	CTGTAGCGGGTCTCGGGATGCATATGTTGCCT	rRNA	b2591	rrsG	2730220	2730240	-	AATTGACGGGGGCCCGCACA	4.83102e-16	7.46946e-16	1	1	CTGTAGCGGGTCTCGGG&ACGGGGGCCCGCACA	.(((.(((((((((.(.&.).))))))))))))	-21.1	No	Yes	No
126620_8	protein_coding	b0833	yliE	873263	873288	+	GACTCGGTGGGACTGGTACTTGATG	protein_coding	b4226	ppa	4449420	4449445	-	GTTGACGTACTGGTCCCAACTCCGT	0.0161785	0.019625	2	1	TCGGTGGGACTGGTACTTGATG&GTTGACGTACTGGTCCCAACTCCGT	.((((((((((((((((((((.&))))).))))))))))))...))).	-23.7	Yes	No	No
126633_20	inter	int-1067-1	int-1067-1	2035680	2035732	+	TTCAACACCAGTGCAGCATCATCATTACATACTTACAGCCGCCGACTACCGC	protein_coding	b4471	tdcG	3258274	3258299	-	GTGGTCTGCGGCTGACATTGCTGTC	2e-323	6e-323	2	1	TGCAGCATCATCATTACATACTTACAGCCGCCGACTACC&GTGGTCTGCGGCTGACATTGCTGTC	.((((((.................(((((((.((((((.&)))))).)))))))....)))))).	-28.6	No	Yes	No
1266394_1	ncRNA	b4432	ryeA	1923063	1923163	+	ATAAAGTCAGCGAAGGAAATGCTTCTGGCTTTTAACAGATAAAAAGAGACCGAACACGATTCCTGTATTCGGTCCAGGGAAATGGCTCTTGGGAGAGAGC	rRNA	b4009	rrlE	4210910	4210976	+	GTTTCGGCAAGGGGGTCATCCCGACTTACCAACCCGATGCAAACTGCGAATACCGGAGAATGTTAT	0	0	3	1	GAACACGATTCCTGTATTCGGTCCAGGGAAATGGCTCTTGGGAGAGAG&GTTTCGGCAAGGGGGTCATCCCGACTTACCAACCCGATGCAAACTGCGAATACCGGAGAATGTTA	.((((...((((.((((((((((..((((..((((((((..(.((((.&.))))..)..))))))))))))))).....................))))))).))))..)))).	-31.2	No	Yes	Yes
1266398_1	protein_coding	b0001	thrL	205	269	+	CCACCATTACCACCACCATCACCATTACCACAGGTAACGGTGCGGGCTGACGCGTACAGGAAAC	tRNA	b3761	trpT	3946997	3947060	+	GGGTGTTGGGAGTTCGAGTCTCTCCGCCCCTGCCAGAAATCATCCTTAGCGAAAGCTAAGGAT	0	0	1	1	AGGTAACGGTGCGGGCTGACGCGTACA&AGTTCGAGTCTCTCCGCCCCTGCCA	.((((..((.(((((..(((.((.((.&.)).)).)))..))))))).)))).	-22.7	Yes	No	No
1266406_1	protein_coding	b0133	panC	148595	148624	-	AACCCGATGCAGTTCGACCGCCCGGAAGA	ncRNA	b4444	omrA	2976100	2976168	-	GATTATTCGGTACGCTCTTCGTACCCTGTCTCTTGCACCAACCTGCGCGGATGCGCAGGTTTTTTTTC	3.42524e-05	4.58798e-05	1	1	CCCGATGCAGTTCGACCGCCCGGAA&ATTCGGTACGCTCTTCGTACCCTGTCTCTTGCACCAACCTGCGCGGA	.(((.(((((..(((..(((((((.&.)))))...))...))).....................)))))))).	-15.5	No	Yes	No
1267375_1	5UTR	b1838	pphA	1923104	1923121	-	CGTGTTCGGTCTCTTTT	antisense_protein_coding	antisense-b3349	antisense-b3349	3477949	3477966	+	CCTTCGCCACCGTGTTC	0.0053525	0.00668283	1	1	TCGGTC&CACCGT	.((((.&.)))).	-4.6	No	No	Yes
1267583_1	protein_coding	b0932	pepN	993185	993205	+	AAATCTCTCTGGCGATCTGT	5UTR	b3708	tnaA	3888604	3888633	+	TCTCTCGTTTATTTACTTGTTTTAGTAAA	6.79305e-07	9.44283e-07	1	1	TGGCGAT&CTCGTTT	.(((((.&.))))).	-4	No	Yes	No
1267721_1	inter	int-2963-1	int-2963-1	1579535	1579585	+	AAGATGATGATGACGAAACACCCGACAGGAATTTATGTCGGGTGCCTTGT	ncRNA	b4704	arrS	3657993	3658054	-	GTAATCCGATTTAAATATCGAGTCTCCTTGTTTCGACTTAAGCTGGCAATTGGATTGCCAG	0	0	1	1	ACGAAACACCCGACAGGAATTTATGTCGGGTG&AATCCGATTTAAATATCGAGTCTCCTTGTTTCGA	.(((((((...(((..(((((((.(((((((.&.))))))).))))).))..)))....))))))).	-24.5	No	No	Yes
126805_18	ncRNA	b4452	gadY	3664910	3664954	+	TTATTAGTCTGGAGACGGCAGACTATCCTCTTCCCGGTCCCCTA	rRNA	b3851	rrsA	4035971	4035993	+	GCGGGGAGGAAGGGAGTAAAGT	0	0	3	1	CTATCCTCTTCCCGGTCCCCT&CGGGGAGGAAGGGAGTAA	.(((.(((((((...(((((.&.)))))))))))).))).	-20.2	No	No	Yes
126838_18	protein_coding	b1386	tynA	1449091	1449130	-	ATGGAACTTCTTTGACGAAACGCCAACGCTAGGGGCGCT	ncRNA	b4450	arcZ	3350642	3350681	+	TTCCCTGGTGTTGGCGCAGTATTCGCGCACCCCGGTCTA	1.04701e-23	1.71344e-23	3	1	ATGGAACTTCTTTGACGAAACGCCAACGCTAGGGGC&TTCCCTGGTGTTGGCGCAGTATTCGCGCACCCCGGTCTA	.((((.......((.((((.(((((((((((((((.&.))))))))))))))).....))))))........))))	-30.4	No	Yes	Yes
1268803_1	ncRNA	b4585	chiX	507217	507288	+	AGTGACGGCATAATAATAAAAAAATGAAATTCCTCTTTGACGGGCCAATAGCGATATTGGCCATTTTTTTA	rRNA	b2591	rrsG	2730628	2730690	-	ACCTTTGCTCATTGACGTTACCCGCAGAAGAAGCACCGGCTAACTCCGTGCCAGCAGCCGCG	0	0	1	1	GTGACGGCATAATAATAAAAAAATGAAATTCCTCTTTGACGGGCCAATAGCGATATTGGCC&TGCTCATTGACGTTACCCGCAGAAGAAGCACCGGCTAACTCCGTGCCAGCAG	.((..(((((.............((.....(.(((((..((((....(((((.((.((((.&.)).)).)).)))))))))..))))).)))............)))))..)).	-21.2	No	No	Yes
1269070_1	ncRNA	b4704	arrS	3657992	3658054	-	GTAATCCGATTTAAATATCGAGTCTCCTTGTTTCGACTTAAGCTGGCAATTGGATTGCCAGC	rRNA	b3971	rrfB	4171699	4171756	+	GTAGCGCCGATGGTAGTGTGGGGTCTCCCCATGCGAGAGTAGGGAACTGCCAGGCAT	0	0	1	1	AGTCTCCTTGTTTCGACTTAAGCTGGCAATTGGATTGCCAG&ATGGTAGTGTGGGGTCTCCCCATGCGAGAGTAGGGAACTGCCAGGCA	.((((....(((((.((((..(((((...(((.(((((((.&.))))))).))).......))).))..))))..)))))....)))).	-24.6	No	No	Yes
1269094_1	inter	int-90-1	int-90-1	189611	189634	+	GCCACTGAAGGTTTTCTATAATA	3UTR	b2392	mntH	2510132	2510198	-	AACGGCGCAAAGAGACGATCCCATAGCGGAACTTCACTACTGCCATTTAAGGTTTGCGAAAATATC	0.0232783	0.0278857	1	1	GCCACTGAAGGTTTTCTA&GAGACGATCCCATAGCGGA	.((.(((..((((.(((.&.))).))))...))).)).	-8.1	No	Yes	No
1269153_1	protein_coding	b2803	fucK	2938061	2938078	+	GCCACCGGTATTCCACG	protein_coding	b4220	tamA	4442338	4442386	+	ACGGCGTTCCAGGGGCAGGAAAAAAGGATATTCAGGAGAAAATGTGCG	0	0	1	1	GCCACCGGTATTCCA&CGGCGTTCCAGGGGCA	(((.((((.((.((.&.)).)).)).))))).	-12.8	No	Yes	No
126921_20	3UTR	b3655	yicH	3832251	3832270	+	CTTCACCACCAGCCCCTGC	protein_coding	b3716	cbrB	3897743	3897779	+	GTTGTCTGGCTGGTGGCATAGGTGGCGTCGTTATCA	3.89815e-21	6.2619e-21	8	1	CTTCACCACCAGCCC&TGGCTGGTGGCATAGG	((...(((((((((.&.)))))))))...)).	-19.8	No	Yes	No
1270001_1	tRNA	b3798	leuT	3982673	3982705	+	AGTCCCCCCCCTCGCACCACGACTTTAAAGAA	rRNA	b4009	rrlE	4210798	4210822	+	GCGGATGACTTGTGGCTGGGGGTG	0	0	2	1	CCCCCCTCGCACCACGAC&CTTGTGGCTGGGGGT	.(((((.....((((((.&.))))))..))))).	-17.3	No	Yes	No
1270106_1	rRNA	b2589	rrlG	2728405	2728429	-	AGCGGATGACTTGTGGCTGGGGGT	tRNA	b3798	leuT	3982673	3982705	+	AGTCCCCCCCCTCGCACCACGACTTTAAAGAA	0	0	2	1	CTTGTGGCTGGGGGT&CCCCCCTCGCACCACGAC	.((((((..(((((.&.))))).....)))))).	-17.3	No	Yes	No
1270656_1	ncRNA	b4704	arrS	3657989	3658054	-	GTAATCCGATTTAAATATCGAGTCTCCTTGTTTCGACTTAAGCTGGCAATTGGATTGCCAGCTTT	rRNA	b4010	rrfE	4213087	4213160	+	CAGAAGTGAAACGCCGTAGCGCCGATGGTAGTGTGGGGTCTCCCCATGCGAGAGTAGGGAACTGCCAGGCATC	0	0	1	1	AGTCTCCTTGTTTCGACTTAAGCTGGCAATTGGATTGCCAGCT&CGCCGATGGTAGTGTGGGGTCTCCCCATGCGAGAGTAGGGAACTGCCAGGCA	.((((....(((((.((((..(((((...(((.(((((((((.&.))...))))))).))).......))).))..))))..)))))....)))).	-25.4	No	No	Yes
1270694_1	ncRNA	b4443	gcvB	2942696	2942910	+	CTTCCTGAGCCGGAACGAAAAGTTTTATCGGAATGCGTGTTCTGGTGAACTTTTGGCTTACGGTTGTGATGTTGTGTTGTTGTGTTTGCAATTGGTCTGCGATTCAGACCATGGTAGCAAAGCTACCTTTTTTCACTTCCTGTACATTTACCCTGTCTGTCCATAGTGATTAATGTAGCACCGCCTAATTGCGGTGCTTTTTTTTACCTTGCGA	inter	int-1767	int-1767	3657983	3658056	-	ATGTAATCCGATTTAAATATCGAGTCTCCTTGTTTCGACTTAAGCTGGCAATTGGATTGCCAGCTTTCTTTTA	0	0	32	1	CGGAATGCGTGTTCTGGTGAACTTTTGGCTTACGGTTGTGATGTTGTGTTGTTGTGTTTGCAATTGGTCTGCG&TGTAATCCGATTTAAATATCGAGTCTCCTTGTTTCGACTTAAGCTGGCAATTGGATTGCCAGCTTTCTT	.((((.(((((.((((((...((...((((((.(((((.((((........(((((((((.((((((..(((.&.)))..)))))))))))).))).......)))).)))))))))))))..)))))).)))..)).)))).	-31.8	Yes	Yes	Yes
127078_18	ncRNA	b4585	chiX	507215	507288	+	AAAGTGACGGCATAATAATAAAAAAATGAAATTCCTCTTTGACGGGCCAATAGCGATATTGGCCATTTTTTTA	protein_coding	b3516	gadX	3664910	3664996	-	TAAGATTATAGAGTTTTACTCAGACATAAAAAAAACCCGGCATAGGGGACCGGGAAGAGGATAGTCTGCCGTCTCCAGACTAATAA	0	0	17	1	TGACGGCATAATAATAAAAAAATGAAATTCCTCTTTGACGGGCCAATAGCGATATTGGCCATTTTTTTA&ATAAAAAAAACCCGGCATAGGGGACCGGGAAGAGGATAGTCTGCCGTCT	.(((((((...............((...((((((((..(((.((..((((.....(((...((((((((&.))))))))..))))).))..)).))).))))))))...))))))))).	-35.1	Yes	Yes	Yes
127210_2	rRNA	b2589	rrlG	2728549	2728570	-	TAGGGGAGCCGAAGGGAAACC	protein_coding	b3709	tnaB	3890435	3890452	+	TCCCGTCGGCTCCAGTT	4.23259e-20	6.22766e-20	2	1	GGGAGCCGAAGGGAA&TCCCGTCGGCTCCA	.((((((((.((((.&)))).)))))))).	-24.7	No	Yes	No
1272247_1	tRNA	b1909	leuZ	1991891	1991912	-	TTTCTTCCCGAGCCCGGATGG	protein_coding	b4016	aceK	4218829	4218883	+	TTACTACGTGTTAAAGAGCATTACACCCGGCTGTTGCCGGATTACCCGCGCTTC	0	0	1	1	CCCGAGCCCGGATGG&ACACCCGGCTGTTGCCGGA	.(((.((((((.((.&.)).)))).....))))).	-13.5	No	Yes	No
1272426_1	5UTR	b0878	macA	919193	919217	+	GTTAATGACCCGGATTGGCATATG	ncRNA	b4624	ryjB	4527991	4528015	+	TCCATGCCGATTCGGGTTAATCTG	3.55439e-07	4.97309e-07	3	1	ATGACCCGGATTGGCATA&CATGCCGATTCGGGTTAA	.((((((((((((((((.&.)))))))))))))))).	-26.5	Yes	No	No
1273077_1	tRNA	b0203	alaV	225512	225574	+	AGCTGGGAGAGCGCCTGCTTTGCACGCAGGAGGTCTGCGGTTCGATCCCGCATAGCTCCACC	rRNA	b3272	rrfF	3423424	3423480	-	CGTAGCGCCGATGGTAGTGTGGGGTCTCCCCATGCGAGAGTAGGGAACTGCCAGAC	0	0	1	1	GCTGGGAGAGCGCCTGCTTTGCACGCAGGAGGTCTGCGGTTCGATCCCGCATAGCTC&TGGTAGTGTGGGGTCTCCCCATGCGAGAGTAGGGAACTGCCAGA	.((((.((..(.((((((((...((((((.((..........((((((((((.(((.&.))).)))))))))).)))).)))))))))))))..)).)))).	-45.5	No	No	Yes
1273899_1	rRNA	b3854	rrlA	4040156	4040179	+	GAGGGGGGCTGCTCCTAGTACGA	ncRNA	b4458	oxyS	4158372	4158391	-	ACGGAGCGGCACCTCTTTT	9.69674e-78	1.98836e-77	1	1	GAGGGGGGCTGCTCCT&CGGAGCGGCACCTCTTTT	(((((((((((((((.&.)))))))).))))))).	-25.4	No	No	Yes
1273941_1	rRNA	b0204	rrlH	226512	226584	+	TAGCGGATGACTTGTGGCTGGGGGTGAAAGGCCAATCAAACCGGGAGATAGCTGGTTCTCCCCGAAAGCTAT	antisense_protein_coding	antisense-b0805	antisense-b0805	840387	840442	+	TCAGGTTGGTCTGGTTGGTGAGAATTTTATTACTCACATCTTTGGTATTCGCCGT	0.0421133	0.0492997	1	1	AGCGGATGACTTGTGGCTGGGGGTGAAAGGCCAATCAAACCGGGAGATAGCTGGT&TCAGGTTGGTCTGGTTGGTGAGAATTTTATTACTCACATCTTTGGTATTCGCC	.((((((.(((...((.(((((((((((..(..(((.(((((((....(.((((.&)))).)...))))))))))..)..))))))).))))..))...))))))))).	-30.8	No	No	Yes
1274336_1	5UTR	b1838	pphA	1923104	1923154	-	CAAGAGCCATTTCCCTGGACCGAATACAGGAATCGTGTTCGGTCTCTTTT	5UTR	b3434	yhgN	3574877	3574946	+	TAAGCGTTTTTTTCCTGCAAAGATGTGTGCTGTATAAATGTGCCGGTCTCCTCTTGGCACATCTTTCAC	0	0	1	1	CAAGAGCCATTTCCCTGGACCGAATACAGGAATCGTGTTCGGT&CCTGCAAAGATGTGTGCTGTATAAATGTGCCGGTCTCCTCTTGGCACATCTTT	.((((((((.......((((((.((((((.(..(((.(((((.&.)))..)).)))..).))))))........)))))).....))))...)))).	-23.3	No	Yes	No
1274731_1	protein_coding	b2925	fbaA	3070117	3070166	-	AAGATATTCCTTTCTGCTTATCTCAAGGCCCGCTCTGCGGGTCTTTTTT	inter	int-1878	int-1878	3906588	3906650	-	TACTGCATTCGCAGGCAAAACCTGACATAACCAGAGAATACTGGTGAAGTCGGGTTTTTTTG	5.04828e-63	9.88708e-63	1	1	AGATATTCCTTTCTGCTTATCTCAAGGCCCGCTCTGCGGGTC&CATTCGCAGGCAAAACCTGACATAACCAGAGAATACTGGTGAAGTCG	.(((...((((((((.((((.((.(((...((.((((((((.&.))))))))))....))))).)))).)))))).....))....))).	-25.6	No	Yes	No
1275066_1	ncRNA	b4585	chiX	507216	507288	+	AAGTGACGGCATAATAATAAAAAAATGAAATTCCTCTTTGACGGGCCAATAGCGATATTGGCCATTTTTTTA	protein_coding	b1838	pphA	1922839	1922894	-	CACGGTTGTCTTGAGCAGTTGCGCCGCAAATTATGGCATTGTCGTTTTGATCCGT	1.58716e-44	2.91237e-44	1	1	GACGGCATAATAATAAAAAAATGAAATTCCTCTTTGACGGGCCAATAGCGATATTGGCCA&CGGTTGTCTTGAGCAGTTGCGCCGCAAATTATGGCATTGTCGTTTTGATCCGT	.((((............((((((((((.((..((((.(((..((((.((.....(((((.&.)))))......)).))))..)))))))....)).))).)))))))...))))	-24.3	No	No	Yes
1275114_1	protein_coding	b2154	yeiG	2243838	2243910	+	AAAGTTACTCACAGCACATTGAATAAACGGTATGATGAAGAAATTGCAAACAACACAACAAGGAGCCACGCA	inter	int-3444	int-3444	2427832	2427880	-	CAAGATGGCATAAGACCTGCATGAAAGAGCCTGCAAACACACAACACA	7.54999e-296	2.1594e-295	1	1	ATTGCAAACAACACAACAAGGAGCCAC&ATGGCATAAGACCTGCATGAAAGAGCCTGCAAA	.(((((.......((...(((.((((.&.))))......)))...))........))))).	-9.4	No	Yes	No
1275612_1	protein_coding	b0061	araD	66101	66129	-	ATGAGTGGGAAACCGGTAACGTCATCGT	protein_coding	b1641	slyB	1720053	1720091	+	ACGTTATCGGTGCAATTGGCGGTGCTGTTCTTGGTGGT	0	0	1	1	ATGAGTGGGAAACCGGTAACGTC&ACGTTATCGGTGCAATTGGCGGTGCTGTTCTTGGTGGT	((.(.(((((((((((((((((.&)))))))))))................)))))).).))	-16.8	No	Yes	No
1275807_1	protein_coding	b0128	yadH	144244	144273	+	ACGTATTTGGGCGGGGTCTTTTACTCACT	protein_coding	b2592	clpB	2734153	2734186	-	TATGGGAGGAGTTATGCGTCTGGATCGTCTTAC	1.64654e-44	3.02061e-44	1	1	ACGTATTTGGGCGGGGTCTTTTACTCAC&ATGGGAGGAGTTATGCGTCTGGATCGTC	(((.(((((((((.(..(((((.((((.&.)))))))))...).)))))))))))).	-18.2	No	No	Yes
127595_1	ncRNA	b4443	gcvB	2942695	2942719	+	ACTTCCTGAGCCGGAACGAAAAGT	protein_coding	b3024	ygiW	3169482	3169502	-	ACCTGGGTAACCCTGCGCGG	8.07789e-06	1.01341e-05	1	1	CCTGAGCCGGA&CCCTGCGCGG	.(((.((.((.&.)).)).)))	-7.5	No	No	Yes
1276024_1	protein_coding	b2415	ptsH	2533802	2533819	+	CTGCACACCCGCCCTGC	protein_coding	b3312	rpmC	3448541	3448591	-	CTGAACGAGAAGGCGGGTGCGTAATGACCGATAAAATCCGTACTCTGCAA	1.36347e-11	2.0211e-11	2	1	CTGCACACCCGCCC&AGGCGGGTGCGTAA	.(((.((((((((.&.)))))))).))).	-21.3	Yes	No	No
127641_17	protein_coding	b1719	thrS	1800796	1800817	-	ACACTTTGCGTCGCGTCCCAT	protein_coding	b2034	wbbI	2106011	2106032	-	TCTCTAGACGCGATGCTGGAT	9.08097e-13	1.36142e-12	1	1	TGCGTCGCGTCC&AGACGCGATGCT	.((((((((((.&.)))))))))).	-19.5	No	Yes	No
1277011_1	ncRNA	b4422	rdlB	1269858	1269924	+	TCTGGTTTCAAGATTAGCCCCCGTTCTGTTGTCAGGTTTTACCTCTCAACGTGCGGGGGTTTTCTC	protein_coding	b4016	aceK	4218764	4218826	+	ACGTTGGTCTGGTCGTGGAGCAACTGCGCTGCATTACTAACGGCCAAAGTACGGACGCGGCA	0	0	1	1	AGCCCCCGTTCTGTTGTCAGGTTTTACCTCTCAACGTGCGGGGGTTTTC&TGGAGCAACTGCGCTGCATTACTAACGGCCAAAGTACGGACGCGGCA	.(((..((.(((((.....((((............((((((..(((((.&.)))))..))))))............)))).....))))))).))).	-27.5	No	No	Yes
1277064_1	5UTR	b1783	yeaG	1866764	1866830	+	ACGTTGTTCTCATCGTCGATAAAATGGCATGAGAGTTGCTGTGTTTTAGCAAGAGACGTCGTTCAG	ncRNA	b4452	gadY	3664902	3664968	+	ATAACGGTTTATTAGTCTGGAGACGGCAGACTATCCTCTTCCCGGTCCCCTATGCCGGGTTTTTTT	0	0	1	1	ATGGCATGAGAGTTGCTGTGTTTTAGCAAGAGACGTCGTTC&TAACGGTTTATTAGTCTGGAGACGGCAGACTATCCTCTTCCCGGTCCCCTATGCCGG	.((((((((((((((((((.(((((((...((((..((((.&.))))))))....).)))))))))))))......)))))...........)))))).	-22.9	No	No	Yes
1277187_1	antisense_protein_coding	antisense-b1234	antisense-b1234	1290082	1290115	-	CCATTTTCCTTTCCACTGCCAGCTGTCCGGCCG	protein_coding	b4240	treB	4465643	4465671	-	CCTGCCGGTCGGTATTTGCTGGTCAGCG	0.000281565	0.0003684	1	1	ACTGCCAGCTGTCCGGCCG&CCGGTCGGTATTTGCTGGTCAGC	.((((((((.(((((((((&.))))))).))..))))).))).	-25.2	Yes	No	No
1278245_1	protein_coding	b3708	tnaA	3889649	3889711	+	TGGCGGCCTGGAAGGCGGCGCGATGGAGCGTCTGGCGGTAGGTCTGTATGACGGCATGAATC	ncRNA	b4691	sroH	4190368	4190441	-	AGAAATTCAGACATCCCGCAACCTGCGATTATCGCAAGGTCAAGGCAAAGTCCGGTAATGGCGTTCTGAATAC	1.92326e-193	4.91121e-193	1	1	TGGCGGCCTGGAAGGCGGCGCGATGGAGCGTCTGGCGGTAGGTCTGT&TCAGACATCCCGCAACCTGCGATTATCGCAAGGTCAAGGCAAAGTCCGGTAATGGCGTTC	.((((.((((((..((((((((((((.(((....((((...(((((.&.)))))...))))....)))..)))))))...)))...))....)))))....).)))).	-37.5	No	Yes	No
127923_14	protein_coding	b2844	yqeF	2985557	2985614	-	TGTTAATTGGTGCGAGGTTGTGATGAAAGACGTTGTGATTGTCGGGGCGTTACGGAC	tRNA	b4368	leuV	4606075	4606098	-	AAGTCCCCCCCCTCGCACCAATT	8.20534e-40	1.46552e-39	3	1	TAATTGGTGCGAGGTTGTGATGAAAGACGTTGTGATTGTCGGGGCGTTACGGAC&AGTCCCCCCCCTCGCACCAATT	.(((((((((((((..........................((((......((((&.)))))))))))))))))))))	-29.5	Yes	No	No
1279461_1	ncRNA	b4432	ryeA	1923066	1923171	+	AAGTCAGCGAAGGAAATGCTTCTGGCTTTTAACAGATAAAAAGAGACCGAACACGATTCCTGTATTCGGTCCAGGGAAATGGCTCTTGGGAGAGAGCCGTGCGCT	ncRNA	b4408	csrB	2924198	2924296	-	AGGAAGCAATAGTTCAGGATGAACGATTGGCCGCAAGGCCAGAGGAAAAGTTGTCAAGGATGAGCAGGGAGCAACAAAAGTAGCTGGAATGCTGCGAA	0	0	3	1	GTCAGCGAAGGAAATGCTTCTGGCTTTTAACAGATAAAAAGAGACCGAACACGATTCCTGTATTCGGTCCAGGGAAATGGCTCTTGGGAGAGAGCCGTGCGC&ACGATTGGCCGCAAGGCCAGAGGAAAAGTTGTCAAGGATGAGCAGGGAGCAACAAAAGTAGCTGGA	.(((((........(((((((.((((......((((..............((..(((((.(.................(((.((((.(.....((((..((.&.))..))))).)))))))).)))))..))))))......)))).))))))).........))))).	-40.4	No	Yes	No
127953_17	protein_coding	b1534	ydeE	1621627	1621665	+	TGTGCTCTTTTTTGCCCTCATTAACTGCGCCTATTCTG	protein_coding	b4083	yjcS	4306165	4306187	-	GTTCGTTGAGGGCGAGAAAGGC	0.000320078	0.000418062	3	1	TGCTCTTTTTTGCCCTCATTAACT&GTTCGTTGAGGGCGAGAAAGGC	.((.((((((((((((((..(((.&)))...))))))))))))))))	-24.5	No	Yes	No
12796_34	protein_coding	b1189	dadA	1237559	1237591	+	TCGGAGTGGCTATGCGAGTTGTCATACTGGGA	protein_coding	b1189	dadA	1238379	1238415	+	TCCGCTGAAAGGCTACTCGCTGACCATTCCAATTGC	0.000170751	0.000224783	5	1	CGGAGTGGCTATGCGAGTTGTCATACTGGGA&TCCGCTGAAAGGCTACTCGCTGACCATTCCA	.(((((((.(..((((((.(((.....((((&))).).....))).))))))..)))))))).	-26.8	No	Yes	No
1279958_1	protein_coding	b2527	hscB	2658966	2659018	-	GCTGCGTTTTCTCGATAAACTGCGAAGCAGTGCCGAACAACTCGAAGAAAAA	protein_coding	b3507	dctR	3654763	3654819	+	CAGAACGAAGAAGAGATCGACGTAATGTTGCATCAGAATGCCTTCGTCATTATTGA	1.15219e-23	1.88515e-23	1	1	CTCGATAAACTGCGAAGCAGTGCCGAACAACTCGAA&ATCGACGTAATGTTGCATCAGAATGCCTTCGTCATTATTGA	.(((((((...((((((((((((..((((((((((.&.)))).))..)))))))).....))).)))))..)))))))	-19.9	No	No	Yes
128011_8	protein_coding	b1703	ppsR	1787657	1787684	+	TCCATCGTGTTGCCGGAGATTCGCGCC	inter	int-1958-1	int-1958-1	4037473	4037494	+	TTCGCAACACGATGATGAATC	0.0235913	0.0282516	1	1	CCATCGTGTTGCCGGAG&TTCGCAACACGATGA	.((((((((((.((((.&)))))))))))))).	-20	Yes	No	No
1280121_1	5UTR	b0440	hupB	461332	461349	+	GATCGGGCTTGCCCTTA	5UTR	b3729	glmS	3913716	3913739	-	CAAGGCTCGGGGCGCCCGAAAAA	0	0	2	1	ATCGGGCTTGCCCTT&CGGGGCGCCCGAA	.((((((..(((((.&.))))))))))).	-20.4	No	Yes	No
12801_184	protein_coding	b1449	curA	1519481	1519530	+	GCTGCGTTTTCTCGATAAACTGCGAAGCAGTGCCGAACAACTCGAAGAAAAA	ncRNA	b4443	gcvB	2942846	2942882	+	CAGAACGAAGAAGAGATCGACGTAATGTTGCATCAGAATGCCTTCGTCATTATTGA	0	0	33	1	CTCGATAAACTGCGAAGCAGTGCCGAACAACTCGAA&ATCGACGTAATGTTGCATCAGAATGCCTTCGTCATTATTGA	.(((((((...((((((((((((..((((((((((.&.)))).))..)))))))).....))).)))))..)))))))	-19.9	No	No	Yes
1280295_1	protein_coding	b0953	rmf	1015830	1015888	+	ATGGCTGGGAGGCTGGCGAGAAGCCATGGCGGACAGGGTAGTAATGGCCTGATTCTGT	rRNA	b2589	rrlG	2728253	2728316	-	GTTTCGGCAAGGGGGTCATCCCGACTTACCAACCCGATGCAAACTGCGAATACCGGAGAATGT	0	0	1	1	GCTGGGAGGCTGGCGAGAAGCCATGGCGGACAGGGTAGTAATGGCCTGATTCTGT&AAGGGGGTCATCCCGACTTACCAACCCGATGCAAACTGCGAATACCGGA	.((((.....(.((.((....(((.(.((...((..(((..(((..(((((((.(&.).)))))))..))))))..))..))).)))....)))).)...)))).	-26.5	No	No	Yes
1280566_1	antisense_protein_coding	antisense-b1851	antisense-b1851	1932938	1932955	+	GCAGCGTCAGTTCGCCT	protein_coding	b4015	aceA	4217635	4217664	+	TGAAGCCGGTGCAGCGGCAGTTCACTTCG	0	0	1	1	GCAGCGTCAGTTCGCCT&CGGTGCAGCGGCAGTTCA	(.((((((.(((((((.&.)))).)))))).)))).	-10.8	No	No	Yes
1280979_1,400747_1	ncRNA	b3864	spf	4049901	4049987	+	GGGTACAGAGGTAAGATGTTCTATCTTTCAGACCTTTTACTTCACGTAATCGGATTTGGCTGAATATTTTAGCCGCCCCAGTCAGT	protein_coding	b4037	malM	4250438	4250532	+	TCCACCTTTATCAGCAGTGTAAAAGGCAAGGGGTAATTACGCCCCACAGTGCTGATTTTGCAACAACTGGTGCGTCTCCTGGCGCACCTTTTTT	0	0	4	2	GGGTACAGAGGTAAGATGTTCTATCTTTCAGACCTTTTACTTCACGTAATCGGATTTGGCTGAATATTTTAGCCGCCCCAGTCA&AGGCAAGGGGTAATTACGCCCCACAGTGCTGATTTTGCAACAACTGGTGCGTCTCCTGGCGCACCTT	((((....(((..((((((............(((..........((.((((((.....((((............(((((.(((.&.)))..)))))............)))).)))))).))........)))))))))))).....)))).	-28	No	Yes	Yes
1281547_1	5UTR	b2573	rpoE	2710015	2710089	-	TGCTTGCTCAAATTGCAGCTAATGGAGTGGCGTTTCGATAGCGCGTGGAAATTTGGTTTGGGGAGACTTTACCT	inter	int-4362-1	int-4362-1	4242496	4242555	+	TTAACCGGCGAACGATTCAGATTGCAGACGAAAGAAAAAAAGGCGCTCCGTGGAGCGCC	0	0	1	1	TGCAGCTAATGGAGTGGCGTTTCGATAGCGCGTGGAAATTTGGTTTGGGGA&ACCGGCGAACGATTCAGATTGCAGACGAAAGAAAAAAAGGCGCTCCGTGGAGCGCC	.((.(((.((((((((.(.((((.....((..((..(((((((((((.((.&.))..)))))....)))))).))..))...))))....).))))))))..))))).	-30.4	No	Yes	No
1281559_1	protein_coding	b0882	clpA	925471	925518	+	AAAGAGAAAAATGAGCTGACTTACGGATTCCAGAGTGCACAAAAGCA	ncRNA	b4704	arrS	3657983	3658052	-	AATCCGATTTAAATATCGAGTCTCCTTGTTTCGACTTAAGCTGGCAATTGGATTGCCAGCTTTCTTTTA	1.00863e-173	2.50571e-173	1	1	AAAGAGAAAAATGAGCTGACTTACGGATTCCAGAGTGCACAAAAGCA&TTGTTTCGACTTAAGCTGGCAATTGGATTGCCAGCTTTCTTTTA	.((((((.....((((((.(...(.((((((((.........(((((&.))))).........)))).)))).)...).)))))))))))).	-21.4	No	No	Yes
1281624_1	ncRNA	b4585	chiX	507214	507286	+	TAAAGTGACGGCATAATAATAAAAAAATGAAATTCCTCTTTGACGGGCCAATAGCGATATTGGCCATTTTTT	inter	int-3022	int-3022	1670954	1671016	-	ATTAACGTTGGTTTGAGCTGGCAATAAGTCCGGACGGGTATTTACCGCAGTCCGGACTTATT	0	0	1	1	AAAGTGACGGCATAATAATAAAAAAATGAAATTCCTCTTTGACGGGCCAATAGCGATATTGGCCAT&TTGGTTTGAGCTGGCAATAAGTCCGGACGGGTATTTACCGCAGTCCGGACTTA	.(((((((.((.................((((((((((..(((..(((...(((......(((((.&.)))))...)))))).....))).))).))).))))...)).)))...)))).	-20.6	No	Yes	No
1281644_1	rRNA	b2589	rrlG	2727137	2727169	-	TTGAACTCGCTGTGAAGATGCAGTGTACCCGC	rRNA	b3275	rrlD	3424791	3424857	-	AAGGTAGCGAAATTCCTTGTCGGGTAAGTTCCGACCTGCACGAATGGCGTAATGATGGCCAGGCTG	3.37781e-257	9.2217e-257	1	1	TCGCTGTGAAGATGCAGTGTACCCGC&TCGGGTAAGTTCCGACCTGCACGAATGGCGT	.((((((...(.(((((.(((((((.&.)))))........))))))))..)))))).	-20.3	No	Yes	No
1281722_1	protein_coding	b2587	kgtP	2725572	2725661	-	CAGGTAATCTGGTCGAGTGGTTCGATTTCTATGTCTACTCGTTCTGTTCACTCTACTTTGCCCACATCTTCTTCCCTTCCGGGAACACG	ncRNA	b4704	arrS	3657986	3658054	-	GTAATCCGATTTAAATATCGAGTCTCCTTGTTTCGACTTAAGCTGGCAATTGGATTGCCAGCTTTCTT	0	0	2	1	AGGTAATCTGGTCGAGTGGTTCGATTTCTATGTCTACTCGTTCTGTTCACTCTACTTTGCC&GTAATCCGATTTAAATATCGAGTCTCCTTGTTTCGACTTAAGCTGGCAATTGGATTGCCA	.((((((((((((.(((((.((((...........(((((...((((.........((((.&)))).........)))).))))).........))))))...))).)..))))))))))).	-23.9	Yes	No	Yes
1282163_1	ncRNA	b4585	chiX	507216	507279	+	AAGTGACGGCATAATAATAAAAAAATGAAATTCCTCTTTGACGGGCCAATAGCGATATTGGCC	protein_coding	b1234	rssA	1289350	1289386	+	TCGTTGCAGGATGTTCAATTGGTTCGCTGGTGGGCG	0	0	1	1	TTCCTCTTTGACGGGCCAATAGCGATATTGGCC&TGCAGGATGTTCAATTGGTTCGCTGGTGGGC	.(((.((..(.(((((((((.(.((((((.((.&.))..))))))).)))))))))).)).))).	-19.7	No	No	Yes
1282773_1	protein_coding	b2126	yehU	2214198	2214224	-	ATTACCGCCGGTGCCGTCACGTTCGT	ncRNA	b4704	arrS	3657987	3658054	-	GTAATCCGATTTAAATATCGAGTCTCCTTGTTTCGACTTAAGCTGGCAATTGGATTGCCAGCTTTCT	3.10151e-27	5.17953e-27	1	1	CGCCGGTGCCGTCA&CGACTTAAGCTGGCA	.((((((...(((.&.)))....)))))).	-13.8	No	Yes	No
1283225_1	inter	int-2710	int-2710	1041926	1041982	-	ATTAGACAGTTCTTCGTTTGTCATCAGCCTCAGAGCATTCAGGTAACTGAATGCTC	protein_coding	b4173	hflX	4400865	4400921	+	AATTGCGGAAGCTGTCAAAGCGACGGGTGCTTCGGTCGTTCTTTTTGACCATGCCC	4.58315e-92	9.80796e-92	1	1	AGACAGTTCTTCGTTTGTCATCAGCCTCAGAGCAT&TTGCGGAAGCTGTCAAAGCGACGGGTGCTTCGGTCG	.((((((.((((((((.....((((.((...(((.&.))).)).))))...))))))..)).)))...))).	-18.9	No	Yes	No
128410_9	rRNA	b0204	rrlH	227997	228023	+	TAGTTTGACTGGGGCGGTCTCCTCCT	rRNA	b3758	rrlC	3946218	3946272	+	ACATCCTGGAGCTGAAGTAGGTCCCAAGGGTATGGCTGTTCGCCATTTAAAGTG	5.50989e-77	1.12675e-76	1	1	TAGTTTGACTGGGGCGGTCTCCTCCT&TGGAGCTGAAGTAGGTCCCAAGGGTATGGCTGT	(((((..((((((((..((..((((.&.))))..)).....))))))...))..))))).	-19.8	No	Yes	No
1284777_1	protein_coding	b3179	rlmE	3327551	3327573	-	TACGTTCCCGTGCCTGGTTTAA	ncRNA	b4704	arrS	3657983	3658054	-	GTAATCCGATTTAAATATCGAGTCTCCTTGTTTCGACTTAAGCTGGCAATTGGATTGCCAGCTTTCTTTTA	1.67407e-193	4.27635e-193	1	1	ACGTTCCCGTGCCTGGTTTAA&TTAAGCTGGCAATTGGATTGC	.((.(((..((((.((((((.&.))))))))))...))).)).	-13.9	No	No	Yes
1285023_1	antisense_protein_coding	antisense-b0837	antisense-b0837	879785	879825	-	CACTGGACTCGTCGGTGAGAACGTATAAATAACCGTCGGG	ncRNA	b1954	dsrA	2025242	2025295	-	GTGTAACGAATTTTTTAAGTGCTTCTTGCTTAAGCAAGTTTCATCCCGACCCC	3.47066e-161	8.45417e-161	1	1	TGGACTCGTCGGTGAGAACGTATAAATAACCGTCGG&ACGAATTTTTTAAGTGCTTCTTGCTTAAGCAAGTTTC	.(((((.((.((((((((.((((.........(((.&.))).........))))))))))))...)).))))).	-16.5	No	No	Yes
1285188_1	protein_coding	b0449	mdlB	472338	472400	+	CTGGCAGATGTATCAACTGCAACTTGCGGGCGAAGAGCTGGCAGCCAGCGTGCGTGAAGAGG	tRNA	b1984	asnW	2058028	2058096	-	GTAGTTCAGTCGGTAGAACGGCGGACTGTTAATCCGTATGTCACTGGTTCGAGTCCAGTCAGAGGAGC	3.28254e-10	4.78823e-10	1	1	CTGGCAGATGTATCAACTGCAACTTGCGGGCGAAGAGCTGGCAGCCAGCGTGCGTGAAG&GTTCAGTCGGTAGAACGGCGGACTGTTAATCCGTATGTCACTGGTTCGAGTCCAGTCAGA	(((((.(((...(((((((..((.((((((..((.(((((.(.....((..((.((((.&.))))))..)).....).))).)).))..)))))).))..).)))).)))))..))))).	-29	No	No	Yes
128641_20	ncRNA	b4417	rybB	888009	888067	-	CTTAATTAGTGCCACTGCTTTTCTTTGATGTCCCCATTTTGTGGAGCCCATCAACCCC	protein_coding	b2344	fadL	2461329	2461360	+	AAGTCTGCTCTCGCAGTCGCAGTGGCACTTA	5.55867e-232	1.48515e-231	4	1	TAGTGCCACTGCTTTTCTTTGATGTCCCCATTTTGTGGAGCC&TGCTCTCGCAGTCGCAGTGGCACTT	.(((((((((((....................(((((((((.&.)))).)))))..))))))))))).	-29.2	No	No	Yes
1286625_1	ncRNA	b4432	ryeA	1923100	1923174	+	GATAAAAAGAGACCGAACACGATTCCTGTATTCGGTCCAGGGAAATGGCTCTTGGGAGAGAGCCGTGCGCTAAA	protein_coding	b3021	mqsA	3168227	3168286	-	ATTCATGACGTACTGATCGTCTCGTTTAAGGAGAAGTAATATGAAATGTCCGGTTTGCC	0	0	1	1	GAGACCGAACACGATTCCTGTATTCGGTCCAGGGAAATGGCTCTTGGGAGAGAGCCGTGCGC&ACGTACTGATCGTCTCGTTTAAGGAGAAGTAATATGAAATGTCCGGTTTG	.((((((.(((...(((..(((((............((..(((((..((((((.(.(((((.&.))))).).)).)))).....)))))..)))))))))).))).)))))).	-26.1	No	Yes	No
1286640_1	antisense_protein_coding	antisense-b0981	antisense-b0981	1042581	1042625	+	ACTGTCTGGCGTCGCACCGGTGATCATTAGAATGTTATTCTCCG	ncRNA	b4432	ryeA	1923084	1923156	+	CTTCTGGCTTTTAACAGATAAAAAGAGACCGAACACGATTCCTGTATTCGGTCCAGGGAAATGGCTCTTGGG	2.66279e-05	3.57883e-05	1	1	ACTGTCTGGCGTCGCACCGGTGATCATTAGAATGTTATTCTCCG&TGGCTTTTAACAGATAAAAAGAGACCGAACACGATTCCTGTATTCGGTC	((((...((.((((...((((..((.(((...(((((....((.&.))....)))))..)))...)).))))....)))).))......)))).	-17.8	No	No	Yes
1286746_1	ncRNA	b4585	chiX	507219	507286	+	TGACGGCATAATAATAAAAAAATGAAATTCCTCTTTGACGGGCCAATAGCGATATTGGCCATTTTTT	rRNA	b3968	rrsB	4167190	4167209	+	ATACGGAGGGTGCAAGCGT	0	0	1	1	GGCATAATAATAAAAAAATGAAATTCCTCTT&CGGAGGGTGCA	.((((....................(((((.&.))))))))).	-8	No	Yes	No
1286786_1	protein_coding	b1415	aldA	1488217	1488241	+	CACAGGAGTCGCCCATGTCAGTAC	antisense_protein_coding	antisense-b1806	antisense-b1806	1890522	1890554	+	GAACCGCCATGGTGCGACTCCTTTTTTTCTCA	0.00146974	0.00187816	3	1	CAGGAGTCGCCCATGTCAGTA&AACCGCCATGGTGCGACTCCTT	.((((((((((((((.(.((.&.)).).))))).))))))))).	-26.1	Yes	No	No
1286874_1	3UTR	b0729	sucD	765065	765112	+	ATAGCCCTCGCCGCTTCCCTCTACAGGAATGGCGAAGGGCTGTCGGT	tRNA	b1986	asnU	2059854	2059926	+	CTGTAGTTCAGTCGGTAGAACGGCGGACTGTTAATCCGTATGTCACTGGTTCGAGTCCAGTCAGAGGAGCCA	0	0	1	1	AGCCCTCGCCGCTTCCCTCTACAGGAATGGCGAAGGGCTGTCGG&ACGGCGGACTGTTAATCCGTATGTCACTGGTTCGAGTCCAGTCAGAGGAGCC	.((((((...(((...(((..(((((((((..((.((((((((.&.)))))).)).))...))))...)).)))....)))...)))..)))).)).	-29.6	No	Yes	No
1287179_1	inter	int-3615-1	int-3615-1	2731470	2731499	+	TTCCGGCCTGACAAGCGAAAAATATAAAA	3UTR	b3967	murI	4166321	4166343	+	AATTTCCTCTTGTCAGGCCGGA	2.39091e-05	3.21689e-05	1	1	TTCCGGCCTGACAAGCGAAAA&ATTTCCTCTTGTCAGGCCGGA	.((((((((((((((.((((.&.))))..))))))))))))))	-29.8	No	Yes	No
1287182_1	ncRNA	b4585	chiX	507227	507288	+	TAATAATAAAAAAATGAAATTCCTCTTTGACGGGCCAATAGCGATATTGGCCATTTTTTTA	protein_coding	b1236	galU	1292113	1292176	+	CTTAGCGCGGATATTTGGCCGTTGCTGGCAAAAACCCCTCCGGGAGCTGGTGATGAAATTCAG	5.17414e-69	1.03249e-68	1	1	ATGAAATTCCTCTTTGACGGGCCAATAGCGATATTGGCCAT&TTGGCCGTTGCTGGCAAAAACCCCTCCGGGAGCTGGTGATGAAATTCAG	.((((.((((((((.((.(((....(((((((...(((((.&.)))))))))))).......))).)).)))))........))).)))).	-27.2	No	No	Yes
12884_42	ncRNA	b4417	rybB	888006	888064	-	AATTAGTGCCACTGCTTTTCTTTGATGTCCCCATTTTGTGGAGCCCATCAACCCCGCC	protein_coding	b2776	ygcE	2902942	2902964	+	CTGGAAAGCGTGGCGCTGACGC	1.39334e-06	1.92295e-06	3	1	ATTAGTGCCACTGCTTTTCT&TGGAAAGCGTGGCGCTGAC	.((((((((((.(((((((.&.))))))))))))))))).	-25.2	Yes	No	No
128906_17	protein_coding	b0464	acrR	486365	486394	+	TCTCCTGTGCCCCACGCTTCGTAATCCTG	rRNA	b2591	rrsG	2730378	2730471	-	AGCGGTGAAATGCGTAGAGATCTGGAGGAATACCGGTGGCGAAGGCGGCCCCCTGGACGAAGACTGACGCTCAGGTGCGAAAGCGTGGGGAGC	0.00613611	0.0076358	1	1	TGTGCCCCACGCTTCGTAATCCTG&TCAGGTGCGAAAGCGTGGGGAGC	.((.((((((((((((((..((((&.)))))))))).)))))))).))	-29.2	No	Yes	No
128983_8,57427_4	inter	int-1669	int-1669	3428831	3428878	-	GTGTGGGCACTCGAAGATACGGATTCTTAACGTCGCAAGACGAAAAA	rRNA	b4007	rrsE	4209678	4209722	+	CACCTCCTTACCTTAAAGAAGCGTTCTTTGCAGTGCTCACACAG	4.80221e-84	9.35443e-84	35	2	GTGTGGGCACTCGAAGATACGGATTCTTA&AAAGAAGCGTTCTTTGCAGTGCTCACACA	(((((((((((((((((.(((..(((((.&.))))).))))))))).))))))))))).	-32.9	Yes	Yes	No
128994_1	antisense_protein_coding	antisense-b3500	antisense-b3500	3647480	3647498	-	CTCTTCCGATCCAACGCA	inter	int-1921-1	int-1921-1	3982706	3982724	+	TGAACTAAAAATTCAAAA	0	0	1	1	CTTCC&TGAAC	.(((.&.))).	-0.2	Yes	No	No
129019_8	antisense_protein_coding	antisense-b1407	antisense-b1407	1476389	1476424	-	TGATGAATCGTTCGCCAACTGCATTGCCTGATTGT	protein_coding	b3764	yifE	3948070	3948097	+	TTAGGAGCGTGCAGGATGGCGGAAAGC	0	0	3	1	GTTCGCCAACTGCATTGCCTGAT&TTAGGAGCGTGCAGGATGGCGGAA	.(((((((.((((((..(((((.&)))))...))))))..))))))).	-23.9	Yes	No	No
1291724_1	protein_coding	b0740	tolB	778915	778984	+	TCTTCTCAGGGGATGGGATCCGTGCTGAATTTGGTTTCTACAGATGGGCGTTTCAAAGCGCGTCTTCCG	tRNA	b3799	proM	3982792	3982848	+	AATCCTCTCTCGCCGACCAATTTTGAACCCCGCTTCGGCGGGGTTTTTTGTTTTCT	0	0	1	1	CAGGGGATGGGATCCGTGCTGAATTTGGTTTCTACAGATGGGCGTTTCAAAGCGCGTCT&CGACCAATTTTGAACCCCGCTTCGGCGGGGTTTTTTGTTTTCT	.(((((((((((.((.((((((.............((.((((.(.(((((((...(((.&.)))...)))))))))))))))))))).))..)))))))))))	-29.8	Yes	No	No
1292279_1	3UTR	b2904	gcvH	3049093	3049154	-	ACTTCCTGTACATTTACCCTGTCTGTCCATAGTGATTAATGTAGCACCGCCTAATT	tRNA	b3799	proM	3982792	3982844	+	TTTGATATGTTGAAAGGCGGATGCAAATCCGCACACAACATTTCAAAAGACAGGATTGGGTAAATGGCAAAG	0	0	1	1	CTGTACATTTACCCTGTCTGTCCATAGTGATTAATGTAGCACCGCCTA&AAGGCGGATGCAAATCCGCACACAACATTTCAAAAGACAGGATTGGGTAAATGGCAA	.(((.(((((((((.(((((((.....(((..(((((.(((((((((.&.)))))).))).............))))))))...))))).)).)))))))))))).	-37.4	Yes	No	No
129227_18	ncRNA	b4443	gcvB	2942830	2942886	+	ACTTCCTGTACATTTACCCTGTCTGTCCATAGTGATTAATGTAGCACCGCCTAATT	protein_coding	b2913	serA	3058401	3058473	-	TTTGATATGTTGAAAGGCGGATGCAAATCCGCACACAACATTTCAAAAGACAGGATTGGGTAAATGGCAAAG	0	0	30	1	CTGTACATTTACCCTGTCTGTCCATAGTGATTAATGTAGCACCGCCTA&AAGGCGGATGCAAATCCGCACACAACATTTCAAAAGACAGGATTGGGTAAATGGCAA	.(((.(((((((((.(((((((.....(((..(((((.(((((((((.&.)))))).))).............))))))))...))))).)).)))))))))))).	-37.4	Yes	Yes	Yes
129272_2	rRNA	b3278	rrsD	3428717	3428735	-	ATTGAACGCTGGCGGCAG	antisense_protein_coding	antisense-b4088	antisense-b4088	4311653	4311699	+	TCCACATTGCCGCCAGCTTTTTTCAGATTATCCATGTCGATTTTTT	2.39091e-13	3.28506e-13	2	1	TTGAACGCTGGCGGCAG&TTGCCGCCAGCTTTTTTCAG	.((((.((((((((((.&.))))))))))....)))).	-23.3	Yes	No	No
1293005_1	protein_coding	b1234	rssA	1289337	1289389	+	ATTGAAATTGATATCGTTGCAGGATGTTCAATTGGTTCGCTGGTGGGCGCTG	3UTR	b3512	gadE	3658992	3659080	+	TTTATTCCCCTGGTATGTGTATCCACCAGTAGAACCCTTCGTTGCCCGAATGCTGGCAGGAACTGTTGGCAGAACGGCAACATTTTTT	0	0	6	1	CGTTGCAGGATGTTCAATTGGTTCGCTGGTGGGCGCT&TGTGTATCCACCAGTAGAACCCTTCGTTGCCCGAATGCTGGCAGGAACTGTTGGCAGAACGGCAACA	.(((((.(..((.(((((.(((((((((((((((((.&.))))..)))))))).)))))............................)))))))...).))))).	-32.1	No	No	Yes
129324_1,118514_21	rRNA	b2588	rrfG	2726067	2726119	-	CCGATGGTAGTGTGGGGTCTCCCCATGCGAGAGTAGGGAACTGCCAGGCATC	rRNA	b3759	rrfC	3946696	3946742	+	ATTTGCCTGGCGGCCGTAGCGCGGTGGTCCCACCTGACCCCATGCC	0	0	12	2	AGTGTGGGGTCTCCCCATGCGAGAGTAGGGAACTGCCAGGCAT&TTGCCTGGCGGCCGTAGCGCGGTGGTCCCACCTGACCCCATGCC	.((((((((((...(((((((....((.((..((((((((((.&.)))))))))))).)).)))).)))........)))))))))).	-44.5	Yes	Yes	Yes
129337_1	rRNA	b2588	rrfG	2726150	2726189	-	TTGCCTGGCGGCCGTAGCGCGGTGGTCCCACCTGACCCC	rRNA	b4010	rrfE	4213112	4213161	+	TGGTAGTGTGGGGTCTCCCCATGCGAGAGTAGGGAACTGCCAGGCATCA	1.11879e-65	2.04403e-65	4	1	TTGCCTGGCGGCCGTAGCGCGGTGGTCCCACCTGACCC&TGGTAGTGTGGGGTCTCCCCATGCGAGAGTAGGGAACTGCCAGGCAT	.((((((((((((.(((((.((.((((((((((.(((.&.))))).))))))...)))).))).....)).))..)))))))))).	-42.6	Yes	No	Yes
1294047_1	ncRNA	b4433	sdsR	1923106	1923174	-	TTTAGCGCACGGCTCTCTCCCAAGAGCCATTTCCCTGGACCGAATACAGGAATCGTGTTCGGTCTCTT	tRNA	b3799	proM	3982792	3982843	+	AATCCTCTCTCGCCGACCAATTTTGAACCCCGCTTCGGCGGGGTTTTTTGT	0	0	1	1	CCAAGAGCCATTTCCCTGGACCGAATACAGGAATCGTGTTCGGTC&CGCCGACCAATTTTGAACCCCGCTTCGGCGGGGTTTTTTGT	.((((((......(((((..(((((....((..(((((.(((((.&.))))).))....)))..))...)))))))))).)))))).	-21.8	Yes	No	No
1294519_1	ncRNA	b4585	chiX	507216	507287	+	AAGTGACGGCATAATAATAAAAAAATGAAATTCCTCTTTGACGGGCCAATAGCGATATTGGCCATTTTTTT	antisense_protein_coding	antisense-b4303	antisense-b4303	4528070	4528113	+	TTGCTCTTTGCCGGGGATAAGCGCTCTGCTTATCCCCATCTTA	0	0	1	1	AAGTGACGGCATAATAATAAAAAAATGAAATTCCTCTTTGACGGGCCAATAGCGAT&TTGCTCTTTGCCGGGGATAAGCGCTCTGCTTA	((((((..((.((..................(((((.......(((.((.(((((.&))))).)).)))))))))).))..)).)))).	-15.8	No	Yes	No
1294792_1	5UTR	b1838	pphA	1923104	1923149	-	GCCATTTCCCTGGACCGAATACAGGAATCGTGTTCGGTCTCTTTT	ncRNA	b4456	glmZ	3986592	3986617	+	AGACCTGTTTTAACGCCTGCTCCGT	0	0	1	1	CTGGACCGAATACAGGAATCGTGTTCGGTCTC&AGACCTGTTTTAACGCCTGCTCCGT	.((((.......((((..........(((((.&)))))..........)))).)))).	-11.9	No	No	Yes
1295027_1	protein_coding	b3041	ribB	3184424	3184460	-	CAGACGCTACTTTCCTCTTTTGGTACGCCTTTCGAA	ncRNA	b4704	arrS	3657983	3658041	-	AATATCGAGTCTCCTTGTTTCGACTTAAGCTGGCAATTGGATTGCCAGCTTTCTTTTA	1.35554e-224	3.59608e-224	1	1	CAGACGCTACTTTCCTCTTTTGGTACGCCTTTCGAA&TTTCGACTTAAGCTGGCAATTGGATTGCCAGCTTTCTT	.(((.(((.(..(((....(((.((.((...(((((&.))))).....)))).)))..)))..)..)))..))).	-13.6	No	No	Yes
1295189_1	ncRNA	b4452	gadY	3664923	3664969	+	AAATAATCGGGGTGATTGAATAATGGCAAAGGCACCAATTCGTGCAC	protein_coding	b3559	glyS	3722284	3722359	-	TTTTCCTTGCCATAGACACCATCCCTGTCTTCCCCCACATGCT	0	0	1	1	CGGGGTGATTGAATAATGGCAAAGGC&TCCTTGCCATAGACACCATCCCT	.((((((..((..(.(((((.((((.&.))))))))))..)).)))))).	-19.6	No	No	Yes
129518_18	protein_coding	b3298	rpsM	3442073	3442120	-	AAATAATCGGGGTGATTGAATAATGGCAAAGGCACCAATTCGTGCAC	3UTR	b4484	cpxP	4106329	4106372	+	TTTTCCTTGCCATAGACACCATCCCTGTCTTCCCCCACATGCT	2.77649e-69	5.54928e-69	8	1	CGGGGTGATTGAATAATGGCAAAGGC&TCCTTGCCATAGACACCATCCCT	.((((((..((..(.(((((.((((.&.))))))))))..)).)))))).	-19.6	Yes	No	Yes
1295232_1	ncRNA	b4704	arrS	3657986	3658041	-	AATATCGAGTCTCCTTGTTTCGACTTAAGCTGGCAATTGGATTGCCAGCTTTCTT	protein_coding	b3618	yibB	3793623	3793644	-	ATTGGTAGAGGGGATTGGACT	2.33576e-131	5.44913e-131	1	1	ATCGAGTCTCCTTGTTTCGACTTAAGCTGGCAATTGGATTGCCAGC&ATTGGTAGAGGGGATTGGAC	.((.(((((((((..........................((((((.&.))))))))))))))).)).	-17.2	No	Yes	No
129566_2	ncRNA	b4442	micA	2814775	2814805	+	TTCTTCCCAGGCGAGTCTGAGTATATGAAA	rRNA	b3968	rrsB	4167529	4167553	+	AAGTCGACCGCCTGGGGAGTACGG	7.62369e-57	1.35289e-56	2	1	TCTTCCCAGGCGAGTCTGAGTA&AAGTCGACCGCCTGGGGAGT	.(((((((((((.(((.((.(.&.).)))))))))))))))).	-27.7	Yes	No	No
129571_2,1032670_1	ncRNA	b4442	micA	2814749	2814805	+	ATTTTTTTAAAAATTTTCTGAACTCTTTCTTCCCAGGCGAGTCTGAGTATATGAAA	rRNA	b4007	rrsE	4209010	4209041	+	ACGCGTTAAGTCGACCGCCTGGGGAGTACGG	1.60052e-54	2.82046e-54	2	2	TCTTCCCAGGCGAGTCTGAGTATATGA&GCGTTAAGTCGACCGCCTGGGGAGT	.(((((((((((.(((.((.(..(((.&.)))..).)))))))))))))))).	-28.8	Yes	Yes	Yes
1296345_1	antisense_protein_coding	antisense-b1163	antisense-b1163	1214583	1214600	+	CAGCCTTTAGCGATTTA	ncRNA	b4443	gcvB	2942853	2942880	+	TGTCCATAGTGATTAATGTAGCACCGC	2.22009e-13	3.35112e-13	1	1	AGCGA&CCGC	.(((.&.)))	-3.4	No	Yes	No
129648_17	5UTR	b0440	hupB	461334	461381	+	TCGGGCTTGCCCTTATTAAGGGGTGTTGTAAGGGGATGGCTGGCCTG	inter	int-2764-1	int-2764-1	1167502	1167529	+	TTTCCAGCCATTCCCGCGCTTTTCATC	5.07353e-17	7.90304e-17	2	1	AAGGGGTGTTGTAAGGGGATGGCTGGC&TCCAGCCATTCCCGCGCTTTTC	.((((((((.....((((((((((((.&.)))))))))))))))))))).	-29	No	Yes	No
1296583_1	ncRNA	b1954	dsrA	2025240	2025288	-	GAATTTTTTAAGTGCTTCTTGCTTAAGCAAGTTTCATCCCGACCCCCT	rRNA	b4009	rrlE	4211456	4211476	+	TGCGAAGGGGGGACGGAGAA	0	0	1	1	ATCCCGACCCCCT&AGGGGGGACGGAGAA	.(((((.((((((&.)))))).))).)).	-18.1	Yes	No	No
1296927_1	inter	int-2909-1	int-2909-1	1440933	1440954	+	CAAAAAAATAGCCATAAAAAA	antisense_protein_coding	antisense-b2231	antisense-b2231	2339005	2339069	+	CGAGATCGGCCATCAGTTCATGGGCAATTTTCGCCAGACGGATTTCCGTATAACGCATTGCCGC	0	0	1	1	AAAAATAGCCA&GGGCAATTTTC	.(((((.(((.&.))).))))).	-6.8	No	No	Yes
129715_17	5UTR	b1761	gdhA	1842308	1842352	+	CAAAAGCACATGACATAAACAACATAAGCACAATCGTATTAATA	ncRNA	b4443	gcvB	2942696	2942791	+	CTTCCTGAGCCGGAACGAAAAGTTTTATCGGAATGCGTGTTCTGGTGAACTTTTGGCTTACGGTTGTGATGTTGTGTTGTTGTGTTTGCAATTGG	0	0	2	1	CAAAAGCACATGACATAAACAACATAAGCACAATCGTAT&TTACGGTTGTGATGTTGTGTTGTTGTGTTTGCAATTGG	(((..(((...(((((.((((((((((.((((((((((.&.))))))))))...))))))))))))))))))..))).	-30.8	No	Yes	No
1297451_1	pseudogene	b0240-1	b0240-1	258940	259008	+	ACGCTGAATCTGAAGCTGGAACCGGCGGATGATTTTCGTGACGAGCCGGTGAAGTTAACGGCGTGAGT	ncRNA	b4704	arrS	3657985	3658054	-	GTAATCCGATTTAAATATCGAGTCTCCTTGTTTCGACTTAAGCTGGCAATTGGATTGCCAGCTTTCTTT	4.50994e-168	1.11229e-167	1	1	TGAAGCTGGAACCGGCGGATGATTTTCGTGACGAGCCGGTGAAGTTAACGGC&TCCGATTTAAATATCGAGTCTCCTTGTTTCGACTTAAGCTGGCAATTGGATTGCCAGCTTTC	.((((((((..(((((...(((...(((.((((((((((((.......(((.&.))).......))))).)....)))))).))).))).)))))...........)))))))).	-29.1	Yes	No	No
129748_2	protein_coding	b0025	ribF	22044	22072	+	GCTGCGCCGTCAGGTTTCCCCGGTGAAA	5UTR	b4148	sugE	4376838	4376855	+	TTCACCGGGGACGGCCC	9.89812e-13	1.35323e-12	2	1	CGCCGTCAGGTTTCCCCGGTGAAA&TTCACCGGGGACGGCC	.((((.......(((((((((((.&))))))))))))))).	-26.9	Yes	Yes	No
1297852_1	ncRNA	b4585	chiX	507214	507289	+	TAAAGTGACGGCATAATAATAAAAAAATGAAATTCCTCTTTGACGGGCCAATAGCGATATTGGCCATTTTTTTAG	ncRNA	b4444	omrA	2976102	2976171	-	TGAGATTATTCGGTACGCTCTTCGTACCCTGTCTCTTGCACCAACCTGCGCGGATGCGCAGGTTTTTTT	0	0	6	1	TAAAAAAATGAAATTCCTCTTTGACGGGCCAATAGCGATATTGGCCATTTTTTTAG&TGAGATTATTCGGTACGCTCTTCGTACCCTGTCTCTTGCACCAACCTGCGCGGATGCGCAGGTTTTTT	.(((((..((....(((.(...((((((.(((.((((.((((((..((..(((((.&)))))..)))))))))))).)).)...))))))................).)))....))..))))).	-18.9	No	Yes	Yes
129791_20	protein_coding	b1493	gadB	1571293	1571312	-	CCAGCGGTGGCTTCCTGGC	ncRNA	b4438	cyaR	2167114	2167199	+	CTGAAAAACATAACCCATAAAATGCTAGCTGTACCAGGAACCACCTCCTTAGCCTGTGTAATCTCCCTTACACGGGCTTATTTTT	4.26033e-67	8.44526e-67	2	1	CGGTGGCTTCCTGGC&ACCAGGAACCACCT	.(((((.(((((((.&.)))))))))))).	-21.8	No	Yes	No
1297984_1	ncRNA	b4585	chiX	507220	507284	+	AAAAAGCAATGGATGAGCAAGG	protein_coding	b2465	tktB	2580238	2580306	+	AGATTCGTCGTATCATAGA	1.20431e-23	1.96871e-23	1	1	GGATGAGCA&AGATTCGTCG	.(((((((.&.).)))))).	-5.9	Yes	No	No
129798_1	protein_coding	b1237	hns	1292542	1292564	-	AAAAAGCAATGGATGAGCAAGG	3UTR	b4207	fklB	4429789	4429808	+	AGATTCGTCGTATCATAGA	6.98218e-05	8.60634e-05	1	1	GGATGAGCA&AGATTCGTCG	.(((((((.&.).)))))).	-5.9	No	No	Yes
129846_1	5UTR	b0440	hupB	461353	461381	+	GGGGTGTTGTAAGGGGATGGCTGGCCTG	rRNA	b4007	rrsE	4208171	4208192	+	AGATTGAACGCTGGCGGCAGG	5.06631e-202	1.23639e-201	1	1	GGCTGGCC&CGCTGGCG	.((((((.&.)))))).	-9.3	No	No	Yes
1299977_1	protein_coding	b4529	ydbJ	1441044	1441070	+	AGAGGAAGAAAAGATGCGAGCAGCGT	antisense_protein_coding	antisense-b1732	antisense-b1732	1815398	1815415	-	GCGTCTGACTTAGCCAG	0	0	1	1	AGGAAGAAAAGATGCG&GCGTCTGACTTAGCCA	.((..((..((((((.&))))))...))..)).	-11.1	No	No	Yes
1300088_1	5UTR	b1661	cfa	1741201	1741264	+	AGTTGTTAAAGCTACGATAAATATTATGTTTTTACGGGGACAGGATCGTTCCCGACTCACTAT	tRNA	b1977	asnT	2044551	2044624	+	TCTGTAGTTCAGTCGGTAGAACGGCGGACTGTTAATCCGTATGTCACTGGTTCGAGTCCAGTCAGAGGAGCCA	0	0	1	1	AGTTGTTAAAGCTACGATAAATATTATGTTTTTACGGGGACAGGATCGTTCCCGACTCACTAT&TGTAGTTCAGTCGGTAGAACGGCGGACTGTTAATCCGTATGTCACTGGTTCGAGTCCAGTCAGAGGAGCC	.(((.((...(((..(((....((((((....(((((((((((..((((((((((((.(((((&.)))))..))))))..))))))....)))))..))))))...)).))))....))).)))...)).))).	-34.8	Yes	No	No
1301028_1	protein_coding	b0635	mrdA	668118	668189	-	ATACGGCAGAGTCCGCGCTGTTTGTGCGCCGGGCGCTGGTCGCCTTTTTGGGGATTTTGCTGCTGACCGGC	ncRNA	b4445	omrB	2976359	2976383	-	CAGAGGTATTGATAGGTGAAGTCA	2.44031e-107	5.42814e-107	1	1	AGAGTCCGCGCTGTTTGTGCGCCG&AGAGGTATTGATAGGTGAAGTCA	.((.(.(((.(((((.((((..(.&.)..)))).)))))))).).)).	-13.4	No	No	Yes
1301062_1	5UTR	b2289	lrhA	2406733	2406763	-	ATTTTTACTTTCGTCCGGGTTCCGGATGAA	tRNA	b3761	trpT	3946998	3947065	+	GGTGTTGGGAGTTCGAGTCTCTCCGCCCCTGCCAGAAATCATCCTTAGCGAAAGCTAAGGATTTTTT	0	0	1	1	ATTTTTACTTTCGTCCGGGTTCCGGATGAA&CTCTCCGCCCCTGCCAGAAATCATCCTTAGCGAAAGCTAAGGATT	(((((((((((((((.(((...((((.((.&.)))))).))).)................))))))).))))))).	-18	No	Yes	No
1301384_1	protein_coding	b1719	thrS	1800627	1800656	-	CAATTGGAGGAATAAGGTATTAAAGGCGG	ncRNA	b3864	spf	4049916	4049965	+	ATGTTCTATCTTTCAGACCTTTTACTTCACGTAATCGGATTTGGCTGAA	0	0	1	1	TTGGAGGAATAAGGTATTAAAGGCGG&TCTATCTTTCAGACCTTTTACTTCAC	.(((((....(((((...(((((.((&.)).)))))...)))))...))))).	-12.9	No	Yes	No
1301717_1	ncRNA	b4445	omrB	2976360	2976383	-	CAGAGGTATTGATAGGTGAAGTC	inter	int-2226	int-2226	4597067	4597092	-	AACACATTATTAAGAAACAAAAAAA	0.000768758	0.000993376	1	1	ATTGATAGGTGA&ACACATTATTAAG	.((((((((((.&.))).))))))).	-6.1	No	No	Yes
1301766_1	ncRNA	b4445	omrB	2976360	2976383	-	CAGAGGTATTGATAGGTGAAGTC	antisense_pseudogene	antisense-b4038-2	antisense-b4038-2	4251530	4251549	-	TCATTTTTATAATGTTATT	0	0	1	1	AGAGGTATTGATAGGTGAA&TCATTTTTATAATGTTA	.((.((..(((.((((((.&)))))))))..)).)).	-4.2	No	No	Yes
1301816_1	ncRNA	b1954	dsrA	2025223	2025286	-	ATTTTTTAAGTGCTTCTTGCTTAAGCAAGTTTCATCCCGACCCCCTCAGGGTCGGGATTTTTT	ncRNA	b4444	omrA	2976102	2976161	-	CGGTACGCTCTTCGTACCCTGTCTCTTGCACCAACCTGCGCGGATGCGCAGGTTTTTTT	0	0	1	1	AGTGCTTCTTGCTTAAGCAAGTTTCATCCCGACCCCCTCAGGGTCGGGA&CTTCGTACCCTGTCTCTTGCACCAACCTGCGCGGATGCGCA	.((((.((((((....(((((.................((((((((((.&.)))).))))))...)))))........))).))).)))).	-25.3	No	Yes	No
1302681_1	3UTR	b0598	cstA	632003	632061	+	AGAGTGAGGGGGGGATGTTGGCGAATGTTGGCTTAGTGCCCAGGGTTCCCTCTCACCC	tRNA	b1984	asnW	2058026	2058089	-	AGTCGGTAGAACGGCGGACTGTTAATCCGTATGTCACTGGTTCGAGTCCAGTCAGAGGAGCCA	0	0	1	1	AGGGGGGGATGTTGGCGAATGTTGGCTTAGTGCCCAGGGTTCCCTCTCACCC&CGGTAGAACGGCGGACTGTTAATCCGTATGTCACTGGTTCGAGTCCAGTCAGAGGAGCCA	.((......(((((((((((..((((.((..(...(.(((((((..(((((.&.))).))..)).))))).)....)..)).))))...)))))...)))).))......)).	-25.6	No	No	Yes
1302696_1	protein_coding	b0623	cspE	657285	657351	+	ATTTTGATGTCTAAGATTAAAGGTAACGTTAAGTGGTTTAATGAGTCCAAAGGATTCGGTTTCATT	inter	int-4374-1	int-4374-1	4283155	4283177	+	TTTTTAATGAGTTTATTTGTTT	1.52082e-05	2.05209e-05	1	1	CCAAAGGATTCG&TGAGTTTATTTGT	.((((.(((((.&.)))))..)))).	-5.4	No	Yes	No
130282_17	inter	int-4260-1	int-4260-1	3946630	3946674	+	GATGAGAGAAGATTTTCAGCCTGATACAGATTAAATCAGAACGC	inter	int-2018-1	int-2018-1	4168525	4168591	+	TTTAAAAATCTGGATCAAGCTGAAAATTGAAACACTGAACAACGAGAGTTGTTCGTGAGTCTCTCA	9.88347e-17	1.53668e-16	1	1	ATGAGAGAAGATTTTCAGCCTGATACAGATTA&AAATCTGGATCAAGCTGAAAATTGAAACACTGAACAACGAGAGTTGTTCGTGAGTCTCTCA	.((((((((((((((((((.(((..((((((.&.))))))..))).))))))))).......)).......................)))))))	-25.7	No	Yes	No
1302858_1	inter	int-1776	int-1776	3685620	3685650	-	GCGGCAATCTGGGATTTCCGGGGGGAGACA	antisense_protein_coding	antisense-b4187	antisense-b4187	4415876	4415896	-	ACACACACTCCCCCCGTCGC	0.000450051	0.000585581	2	1	GCGGCAATCTGGGATTTCCGGGGGGAGA&ACTCCCCCCGTCGC	(((((..............((((((((.&.)))))))))))))	-22.5	Yes	No	No
1303014_1	protein_coding	b0095	ftsZ	105581	105636	+	AAGGTGCAGACATGGTCTTTATTGCTGCGGGTATGGGTGGTGGTACCGGTACAGG	ncRNA	b3864	spf	4049875	4049940	+	CAAAAAAGAGTAAAGTTAGTCGCGTAGGGTACAGAGGTAAGATGTTCTATCTTTCAGACCTTTTA	0	0	1	1	AAGGTGCAGACATGGTCTTTATTGCTGCGGGTATGGGTGGTGGTACCGGTACA&AGTAAAGTTAGTCGCGTAGGGTACAGAGGTAAGATGTTCTATCTTTCAGACCTTT	(((((..(((.((((......(((((....((((.....((((((.(..(((.&.)))..).)).)))).....))))...)))))......)))).)))...))))).	-19.3	No	Yes	No
1303064_1	tRNA	b1989	asnV	2062265	2062335	+	GTAGTTCAGTCGGTAGAACGGCGGACTGTTAATCCGTATGTCACTGGTTCGAGTCCAGTCAGAGGAGCCA	pseudogene	b4656	yjhY	4532029	4532053	-	CTGATTATCTATACTCCCTCTGAA	1.06255e-103	2.34542e-103	1	1	GTCAGAGGAGC&ACTCCCTCTGAA	.(((((((((.&.)))).))))).	-12.4	No	No	Yes
1303615_1	tRNA	b0746	valZ	781102	781122	+	CAAGGAGGGGGTCGGCGGTT	ncRNA	b3864	spf	4049966	4049988	+	ATTTTAGCCGCCCCAGTCAGTA	0	0	1	1	AGGAGGGGGTCGGCG&AGCCGCCCCAGTCA	.((..((((.((((.&.))))))))..)).	-18	No	Yes	No
130472_1	protein_coding	b2960	trmI	3102407	3102445	-	CATGGTGCAGCTCTTTTTCCCTGACCCGTGGCACAAAG	ncRNA	b3864	spf	4049926	4049946	+	TTTCAGACCTTTTACTTCAC	7.23765e-11	9.73693e-11	1	1	CCTGAC&TTCAGA	.((((.&.)))).	-4.2	Yes	No	No
130473_1	protein_coding	b1492	gadC	1570306	1570333	-	TGGTTTATTCCCGTGGGACTTTGTGCT	ncRNA	b3864	spf	4049926	4049946	+	TTTCAGACCTTTTACTTCAC	4.42908e-160	1.01701e-159	1	1	TGGTTTA&CAGACCT	.(((((.&.))))).	-4.8	Yes	No	No
1304782_1	protein_coding	b0446	cof	468165	468202	+	AGGCTGTCTCTCACTATTTGACGCACTGGCTGGACTA	tRNA	b2816	metV	2947597	2947625	+	GTACGGTGACGCGGGGTGGAGCAGCCTG	0	0	1	1	AGGCTGTCTCTCACTATTTGACGCACTGG&ACGGTGACGCGGGGTGGAGCAGCCTG	((((((.(((.((((..(((.(((((((.&.))))).)))))))))))))))))).	-28.2	No	Yes	No
130483_20	protein_coding	b3271	yhdZ	3422629	3422660	+	ACAGGGACGGATCGTGGTAGATGGCATCGAA	3UTR	b4484	cpxP	4106330	4106369	+	TTTCCTTGCCATAGACACCATCCCTGTCTTCCCCCACAT	4.16062e-05	5.56107e-05	2	1	ACAGGGACGGATCGTGGTAGATGGCATCGAA&TTTCCTTGCCATAGACACCATCCCTGTC	(((((((.((....((....((((((..(((&.)))..))))))...)))).))))))).	-23.3	No	Yes	No
1305036_1	antisense_protein_coding	antisense-b0512	antisense-b0512	540339	540358	-	CAGATCGTCATTGGTAAGA	protein_coding	b3481	nikR	3618776	3618794	+	AAACGCGACTTAGCCAGC	0	0	1	1	ATTGGTAAGA&ACTTAGCCAGC	.((((((((.&.)))).)))).	-5.8	No	No	Yes
13051_42	rRNA	b3758	rrlC	3945679	3945708	+	AATGATGGCCAGGCTGTCTCCACCCGAGA	protein_coding	b3766	ilvL	3950289	3950361	+	ATTCCTTCGAACAAGATGCAAGAAAAGACAAAATGACAGCCCTTCTACGAGTGATTAGCCTGGTCGTGATTA	0	0	1	1	AATGATGGCCAGGCTGTCTCCACCCGAGA&TTCTACGAGTGATTAGCCTGGTCGTGATTA	(((.((((((((((((....(((.(((((&.))).)).)))..)))))))))))).))).	-28.8	Yes	No	No
130531_1	protein_coding	b2927	epd	3073608	3073653	-	CGGGCGTAATGTGGTTCGTGCTTTGTATGAATCCGGACGCCGGGC	ncRNA	b3864	spf	4049926	4049947	+	TTTCAGACCTTTTACTTCACG	7.18601e-241	1.82572e-240	1	1	CGGGCGTAATGTGGTTC&AGACCTTTTACTTCACG	((((.((((...((((.&.))))..)))).)).))	-7	Yes	No	No
1306114_1	protein_coding	b1087	yceF	1146260	1146285	-	CTGGACTGGCGTTGTTTAATTCGGC	ncRNA	b4704	arrS	3657985	3658054	-	GTAATCCGATTTAAATATCGAGTCTCCTTGTTTCGACTTAAGCTGGCAATTGGATTGCCAGCTTTCTTT	1.22615e-49	2.29368e-49	1	1	TGGACTGGCGTTGTTTAATTCGGC&AGCTGGCAATTGGATTGCCAGCTT	.((.((((((..((((((((((((&.)))))..))))))))))))))).	-17.1	No	No	Yes
1306229_1	5UTR	b2288	nuoA	2405085	2405142	-	CCATGAATCGATGTGGCGTCCATCTGCCGTGAAGAGCAGTGAATCTGGCGCTACTTT	ncRNA	b4450	arcZ	3350624	3350696	+	TTACGGCGCAGCCAAGATTTCCCTGGTGTTGGCGCAGTATTCGCGCACCCCGGTCTAGCCGGGGTCATTTTT	0	0	1	1	CCATGAATCGATGTGGCGTCCATCTGCCGTGAAGAGCAGTGAATCTGGCGCT&CGCAGCCAAGATTTCCCTGGTGTTGGCGCAGTATTCGCGCACCCCGGTCTAGCCGGG	((.((.((((..((((((.....(((.(((.((.(.(((.(((((((((((.&.)).)))).)))))..))).).)).))))))....))).)))..)))).))...)).	-38.4	No	Yes	No
130629_14	protein_coding	b2216	rcsD	2314682	2314709	+	CCATGGCGGAACAGCATCAGGGGATTA	ncRNA	b4450	arcZ	3350641	3350663	+	TTTCCCTGGTGTTGGCGCAGTA	6.65287e-10	9.67632e-10	4	1	GGCGGAACAGCATCAGGGGAT&TTTCCCTGGTGTTGGCGCA	.(((...(((((((((((((.&.))))))))))))).))).	-24.9	Yes	No	No
130634_14	ncRNA	b4450	arcZ	3350641	3350662	+	TTTCCCTGGTGTTGGCGCAGT	protein_coding	b3784	wecA	3968032	3968058	+	CGCAAACGTCACCAGGGATTGATACC	2.86832e-106	6.37264e-106	1	1	TTCCCTGGTGTTGGCGC&CGCAAACGTCACCAGGGAT	.(((((((((...(((.&)))......))))))))).	-20.4	Yes	No	No
130640_14	ncRNA	b1954	dsrA	2025240	2025303	-	ATTTCCTGGTGTAACGAATTTTTTAAGTGCTTCTTGCTTAAGCAAGTTTCATCCCGACCCCCT	antisense_protein_coding	antisense-b3567	antisense-b3567	3732503	3732526	-	GTTATTTCGTTACCCAGGAAGAT	3.70423e-74	7.50952e-74	2	1	TTTCCTGGTGTAACGAAT&TTTCGTTACCCAGGAAG	.(((((((.((((((((.&.))))))))))))))).	-22.6	Yes	No	No
1306544_1	ncRNA	b4445	omrB	2976357	2976385	-	CCCAGAGGTATTGATAGGTGAAGTCAAC	protein_coding	b4135	yjdC	4363267	4363311	-	AGCGTGCAACGTGAAGATGTACTGGGAGAAGCCCTGAAATTATT	3.35817e-307	9.72717e-307	1	1	CCAGAGGTATTGATAGGTGAAGTCA&AGATGTACTGGGAGAAGCCCTGA	.(((.(((.((....((((..(((.&.))).))))....)).)))))).	-12.6	No	Yes	No
1306658_1	tRNA	b1986	asnU	2059866	2059926	+	CGGTAGAACGGCGGACTGTTAATCCGTATGTCACTGGTTCGAGTCCAGTCAGAGGAGCCA	ncRNA	b4408	csrB	2924198	2924315	-	ACATCGGGGTGGTGTGAGCAGGAAGCAATAGTTCAGGATGAACGATTGGCCGCAAGGCCAGAGGAAAAGTTGTCAAGGATGAGCAGGGAGCAACAAAAGTAGCTGGAATGCTGCGAA	0	0	3	1	CGGTAGAACGGCGGACTGTTAATCCGTATGTCACTGGTTCGAGTCCAGTCAGAGGAGCCA&AGGATGAACGATTGGCCGCAAGGCCAGAGGAAAAGTTGTCAAGGATGAGCAGGGAGCAACAAAAGTAGCTGGAATGCTGC	(((((...((((...(((((.((((...((.((((((((((.(.((((((.......((.&.))......)))))))))...)))))).........)).)).)))).)))))...............))))...))))).	-34.4	Yes	Yes	Yes
1306766_1	rRNA	b3851	rrsA	4035718	4035791	+	AAGACCAAAGAGGGGTACCTTCGGGCCTCTTGCCATCGGATGTGCCCAGATGGGATTAGCTAGTAGGTGGGGT	rRNA	b4007	rrsE	4208166	4208229	+	GGCTCAGATTGAACGCTGGCGGCAGGCCTAACACATGCAAGTCGAACGGTAACAGGAAGAAGC	3.43638e-62	6.70917e-62	1	1	CCTTCGGGCCTCTTGCCATCGGATGTGCCCAGATGGGATTAGCTAGTAGGTGGGG&GCTCAGATTGAACGCTGGCGGCAGGCCTAACACATGCAAGTCGAACGGTAACAGGAAGAAGC	.((((...(((.(((((.(..(((.(((...(.((((....((((((...((((.&.))))........))))))......)))).)....))).)))..).))))).)))..)))).	-30.7	No	No	Yes
1307872_1	tRNA	b2816	metV	2947607	2947656	+	GCGGGGTGGAGCAGCCTGGTAGCTCGTCGGGCTCATAACCCGAAGGTCG	rRNA	b3758	rrlC	3944572	3944634	+	TTTCGGCAAGGGGGTCATCCCGACTTACCAACCCGATGCAAACTGCGAATACCGGAGAATGT	0	0	1	1	GCGGGGTGGAGCAGCCTGGTAGCTCGTCGGGCTCATAACCCGAAGGTCG&TCGGCAAGGGGGTCATCCCGACTTACCAACCCGATGCAAACTGCG	((((..((.(......((((((...((((((...((.((((....((((&.))))....)))).))))))))))))))......).))..)))).	-35	No	Yes	No
1308101_1	tmRNA	b4645	psaA	2777976	2778036	+	AGCCCACCAATCATGATTGGACGGTGTAAGGACAACACCAACAAAAACAGGAAGTTAGAA	antisense_protein_coding	antisense-b4257	antisense-b4257	4479965	4479982	-	AGAAAAAAACAAAAAAA	0.0307921	0.036583	1	1	GTGTA&AACAA	.(((.&.))).	-1	No	No	Yes
1308157_1	protein_coding	b0913	ycaI	964310	964340	+	GAGGGGTGCATGAAAATAACGACAGTCGGT	protein_coding	b2215	ompC	2312526	2312550	-	TTACTGACCAGCTGACCGGTTACG	2.74356e-07	3.84868e-07	1	1	CGACAGTCGGT&AGCTGACCGGTTA	.(((.((((((&.))))))..))).	-9	No	Yes	No
1308160_1	protein_coding	b3472	dcrB	3610492	3610550	+	ATACGCTGGTTATTCAGTAAGTTTTAAGATGATGAGGCGGCCTCAGGGACGTGTTCCG	ncRNA	b3864	spf	4049945	4049967	+	CGTAATCGGATTTGGCTGAATA	0	0	1	1	TTATTCAGTAAGTTTTAAGATGATGA&CGTAATCGGATTTGGCTGAATA	.((((((((((((((...(((.(((.&))).)))))))))).)))))))	-11.7	No	Yes	No
130823_8	5UTR	b3557	insJ	3720296	3720317	+	CATTTGGCGGGGATTTTTTTA	protein_coding	b3687	ibpA	3867392	3867434	-	GAGCTATTGATTATGCGTAACTTTGATTTATCCCCGCTTTAC	2.45713e-06	3.37064e-06	1	1	TGGCGGGGATT&TATCCCCGCTT	.(((((((((.&.))))))))).	-17.2	Yes	No	No
1308387_1	3UTR	b3867	hemN	4053498	4053529	+	GGCAACAAAACCTGTTGAAATTATTGCTTTT	rRNA	b3970	rrlB	4171209	4171267	+	GTACGCGAGCTGGGTTTAGAACGTCGTGAGACAGTTCGGTCCCTATCTGCCGTGGGCG	9.3877e-82	1.95165e-81	1	1	GGCAACAAAACCTGTTGAAATTATTGCT&CGCGAGCTGGGTTTAGAACGTCGTGAGACAGTTCGGTCCCTATCTGCCG	((((((..((.(((((.......((((.&.)))).....................)))))))..)).......)))).	-10.9	Yes	No	No
1308468_1	protein_coding	b0118	acnB	133348	133391	+	CTGGAAATTGAAGGTCTGCCGGATCTGAAAGTTGAGCAGGCCT	5UTR	b3729	glmS	3913702	3913768	-	AGTAACTATAAAAATAACCCCACTCTCTACAAGGCTCGGGGCGCCCGAAAAAACGGGCATACAGGT	2.36491e-08	3.37107e-08	1	1	CTGGAAATTGAAGGTCTGCCGGATCTGAAAGTTGAGCAGGC&CCCCACTCTCTACAAGGCTCGGGGCGCCCGAAAAAACGGG	(((.........(((.(.((((.(((...((..(((..((.&.))..))).))...))).)))).).)))........))).	-18	No	Yes	No
1309117_1	ncRNA	b4438	cyaR	2167114	2167189	+	CTGAAAAACATAACCCATAAAATGCTAGCTGTACCAGGAACCACCTCCTTAGCCTGTGTAATCTCCCTTACACGG	ncRNA	b4704	arrS	3657983	3658054	-	GTAATCCGATTTAAATATCGAGTCTCCTTGTTTCGACTTAAGCTGGCAATTGGATTGCCAGCTTTCTTTTA	0	0	8	1	TGAAAAACATAACCCATAAAATGCTAGCTGTACCAGGAACCACCTCCTTAGCCTGTGTAATCTCCCTTACA&GTAATCCGATTTAAATATCGAGTCTCCTTGTTTCGACTTAAGCTGGCAATTGGATTGCCAGCTTTCT	.((((....(((.(((.....((((((((......(((((...............(..((((....((((.&))))...))))..)...............)))))......))))))))..))).))).....)))).	-21.6	Yes	Yes	Yes
1309301_1	protein_coding	b2688	gshA	2814860	2814916	-	ACCGTTTGCGGTGTGGCTGGAAAAACACGCCTGACAGAAAAGAAAAAGGCCACTCG	protein_coding	b3270	yhdY	3422055	3422124	+	ATATGTTGCGGAAGTCGTGCGAGGTGGATTACAGGCGCTGCCTAAAGGGCAATATGAAGCGGCAGAGTC	0.0111723	0.0136984	1	1	ACCGTTTGCGGTGTGGCTGGAAAAACACGCCTGACA&AGTCGTGCGAGGTGGATTACAGGCGCTGCCTAAAGGGC	.((.((((.((((((.(((.....((.(((.((((.&.)))).)))..))......))).))).))))))).)).	-27.9	No	Yes	No
1309389_1	5UTR	b1783	yeaG	1866795	1866865	+	AGAGTTGCTGTGTTTTAGCAAGAGACGTCGTTCAGTTTACCTCTTCCGGGAGCCTCTACTATTCATATGA	ncRNA	b4432	ryeA	1923071	1923120	+	AGCGAAGGAAATGCTTCTGGCTTTTAACAGATAAAAAGAGACCGAACAC	0	0	1	1	CGTTCAGTTTACCTCTTCCGGGAGCCTCTA&AGGAAATGCTTCTGGCTTTTAACAGATAAAAAGAGACCGAACA	.((((.((....(((((((((((((.(((.&.)))...))))))))...............))))))).)))).	-19.2	No	No	Yes
1309669_1	ncRNA	b4438	cyaR	2167114	2167149	+	CTGAAAAACATAACCCATAAAATGCTAGCTGTACC	protein_coding	b3301	rplO	3444271	3444329	-	GCAGCGATTACAGCCGAAATTCGTCTGTCTGACCTGGCTAAAGTAGAAGGCGGTGTAG	1.81991e-60	3.52384e-60	1	1	AACATAACCCATAAAATGCTAGCTGTAC&TTACAGCCGAAATTCGTCTGTCTGACCTGGCTAAAGTAGAAGGCGGTGTA	.((((..((..((....((((((((((.&.))))))....................)))).....))...))..)))).	-11.6	Yes	No	No
1309872_1	ncRNA	b4438	cyaR	2167114	2167146	+	CTGAAAAACATAACCCATAAAATGCTAGCTGT	rRNA	b2589	rrlG	2726741	2726796	-	GTGATCCGGTGGTTCTGAATGGAAGGGCCATCGCTCAACGGATAAAAGGTACTCC	0	0	1	1	CCCATAAAATGCTAGCTGT&CCGGTGGTTCTGAATGGA	.((((.....((((.(((.&.))))))).....)))).	-9.1	Yes	No	No
1309920_1,68995_3	rRNA	b2591	rrsG	2729582	2729626	-	TCACCTCCTTACCTTAAAGAAGCGTACTTTGCAGTGCTCACACA	inter	int-1669	int-1669	3428822	3428878	-	GTGTGGGCACTCGAAGATACGGATTCTTAACGTCGCAAGACGAAAAATGAATACCA	1.62879e-124	3.53644e-124	36	2	AAAGAAGCGTACTTTGCAGTGCTCACACA&GTGTGGGCACTCGAAGATACGGATTCTTA	.(((((.(((((((((.(((((((((((.&)))))))))))))))).))))..))))).	-33.1	Yes	Yes	Yes
1309922_1,338244_1	rRNA	b3278	rrsD	3427187	3427231	-	TCACCTCCTTACCTTAAAGAAGCGTACTTTGCAGTGCTCACACA	inter	int-4260-1	int-4260-1	3941692	3941746	+	TGTGGGCACTCGAAGATACGGATTCTTAACGTCGCAAGACGAAAAATGAATACC	1.22751e-129	2.70981e-129	18	2	AAAGAAGCGTACTTTGCAGTGCTCACAC&TGTGGGCACTCGAAGATACGGATTCTTA	.(((((.(((((((((.((((((((((.&))))))))))))))).))))..))))).	-29.2	Yes	Yes	Yes
1309965_1	ncRNA	b4704	arrS	3657986	3658052	-	AATCCGATTTAAATATCGAGTCTCCTTGTTTCGACTTAAGCTGGCAATTGGATTGCCAGCTTTCTT	protein_coding	b3702	dnaA	3882915	3882932	-	CACCTCGGATCGCTATC	7.02288e-61	1.36299e-60	1	1	AATCCGAT&CTCGGATC	.((((((.&.)))))).	-8	No	Yes	No
131040_1	ncRNA	b2911	ssrS	3055984	3056016	+	TTCTCTGAGATGTTCGCAAGCGGGCCAGTCCC	protein_coding	b4037	malM	4250434	4250466	+	CCGTTCCACCTTTATCAGCAGTGTAAAAGGCA	0	0	1	1	TCTCTGAGATGTTCGCAAGCGGG&CCGTTCCACCTTTATCAGCAGT	.((((((..........(((((.&))))).........)))).)).	-9.8	Yes	No	No
1310620_1	tRNA	b3799	proM	3982791	3982843	+	GAATCCTCTCTCGCCGACCAATTTTGAACCCCGCTTCGGCGGGGTTTTTTGT	rRNA	b3851	rrsA	4036853	4036924	+	ACTCCATGAAGTCGGAATCGCTAGTAATCGTGGATCAGAATGCCACGGTGAATACGTTCCCGGGCCTTGTA	3.18851045e-316	9.3075733e-316	1	1	CTCGCCGACCAATTTTGAACCCCGCTTCGGCGGGGTT&ACTCCATGAAGTCGGAATCGCTAGTAATCGTGGATCAGAATGCCACGGTGAA	.((((((....(((((((.((((((((((..(((((.&))))).))))).)))................)).)))))))....)))))).	-30.4	No	Yes	No
1311165_1	ncRNA	b4432	ryeA	1923071	1923189	+	AGCGAAGGAAATGCTTCTGGCTTTTAACAGATAAAAAGAGACCGAACACGATTCCTGTATTCGGTCCAGGGAAATGGCTCTTGGGAGAGAGCCGTGCGCTAAAAGTTGGCATTAATGC	inter	int-1038-1	int-1038-1	1996962	1997037	+	ATGTTATTAATGAGTTATGCTGATTTGTTAAGCAGTTTTATCAGGCTTGAAATGGCGTCCAGCCCCGACAGGTGA	0	0	2	1	TCCTGTATTCGGTCCAGGGAAATGGCTCTTGGGAGAGAGCCGTGCGCTAAAAGTTGGCATT&TATGCTGATTTGTTAAGCAGTTTTATCAGGCTTGAAATGGCGTCCAGCCCCGACAGGT	.((((...((((...........((((....(((..(((((..(((((..((((((((((.&.))))))))))....))).)).......))))).........))))))))))))))).	-30.1	No	No	Yes
131140_19	protein_coding	b1442	ydcU	1514516	1514538	+	TCGCTATGTGGTGCTGCCGCTG	ncRNA	b2911	ssrS	3056138	3056170	+	CAGCCTGCGGCGGCATCTCGGAGATTCCCTTC	0.000257343	0.00033712	3	1	GCTATGTGGTGCTGCCGCT&TGCGGCGGCATCTCGGAGA	.((.((.(((((((((((.&.))))))))))).)).)).	-24.5	No	Yes	No
1311707_1	rRNA	b3275	rrlD	3425853	3425894	-	CGACTTACCAACCCGATGCAAACTGCGAATACCGGAGAATG	protein_coding	b4479	dgoR	3875101	3875174	-	CACAAGGACTCTCCATGACTCTCAATAAAACCGATCGCATTGTCATTACGCTGGGTAAACAGATCGTTCACGG	0.0231615	0.0277723	1	1	CGACTTACCAACCCGATGCAAACTGCGAATACCGGAGAA&CTCTCCATGACTCTCAATAAAACCGATCGCATTGTCATTACGCTGGGTAAACAGATCGT	(((((.....(((((((((((..(((((.....(((((.&.)))))....................)))))))).)))).....))))....)).))).	-18.8	No	Yes	No
131203_9	protein_coding	b0486	ybaT	513126	513159	+	TTCCGTCTCTGCGCCCCCCAGCTCCGGTGCGTT	protein_coding	b3844	fre	4026931	4026961	+	ATTTACTGGGGCGGGCGTGAAGAGCAGCAT	6.3386e-06	8.62578e-06	3	1	CGTCTCTGCGCCCCCCAGCTCCGGTGC&TTACTGGGGCGGGCGTGAAGAGCA	.(.((((((((((....(((((((((.&.)))))))))))))))..))))).	-28.3	No	Yes	No
1312193_1	protein_coding	b1285	gmr	1346299	1346317	-	TTACACAGGGTTGAAAGA	protein_coding	b1630	rsxD	1709357	1709377	+	TTGAAAGATAACTCAGCATT	0.0381855	0.044947	1	1	GGTTGAA&CTCAGCA	.(((((.&.))))).	-5.4	No	No	Yes
1313398_1	pseudogene	b4571-1	b4571-1	2102955	2103002	-	TCCGTAAGAAAATTTCCTGTGCTTTCTGATTTTATTGTGTCATTTAT	protein_coding	b3175	secG	3322353	3322404	-	CGGAGCAGGCGCTTCCGCTACGCTGTTTGGTTCAAGTGGTTCTGGTAACTT	0.00119659	0.00153564	1	1	TCCGTAAGAAAATTTCCTGTGCTTTCTGA&CGGAGCAGGCGCTTCCGCTACGCTGTTTGGT	.(((..((..........((((((((((.&)))))..)))))..........))...))).	-12.1	No	Yes	No
1314036_1	protein_coding	b0973	hyaB	1034086	1034103	+	CGCCTTAGCCATCGGTC	rRNA	b4007	rrsE	4209275	4209294	+	AGCGGTCCGGCCGGGAACT	0	0	1	1	GCCTTAGCCATCGG&GCGGTCCGGCCGGGA	.(((..(((((((.&.))))..))).))).	-9.7	No	No	Yes
131423_8	protein_coding	b2317	dedA	2434580	2434634	-	TTTGTTCTGTGAAACCGGTCTGGTGGTAACGCCGTTTTTACCGGGTGATTCATT	protein_coding	b4174	hflK	4402040	4402069	+	GCGTGGAATCAGCCCGGTAATAACGGACA	0.0306101	0.0364302	3	1	GCCGTTTTTACCGGGTGATTCA&GGAATCAGCCCGGTAATAACGGA	.(((((.((((((((((((((.&.)))))).)))))))).))))).	-29.9	Yes	No	No
131449_1	inter	int-653-1	int-653-1	1216683	1216717	+	TTGTCTGTCGCTTTAGACTATACACAGCATAATT	antisense_protein_coding	antisense-b1286	antisense-b1286	1348817	1348834	+	CCTTTTTCTGTGGCTTT	0	0	1	1	CGCTTTAGAC&TTCTGTGGCT	.(((.((((.&.)))).))).	-6.9	Yes	No	No
1314563_1	protein_coding	b3709	tnaB	3890720	3890753	+	CTTTGTGATCGTGTTTGGTTCTTTTTTCTTCCA	protein_coding	b4016	aceK	4218815	4218834	+	CGGACGCGGCATTTTTACT	0	0	1	1	TGTGATCGTGTTTGG&CGGACGCGGCATT	.(((.(((((((((.&)))))))))))).	-12.6	No	Yes	No
1314934_1	tRNA	b1984	asnW	2058027	2058102	-	TCCTCTGTAGTTCAGTCGGTAGAACGGCGGACTGTTAATCCGTATGTCACTGGTTCGAGTCCAGTCAGAGGAGCC	tRNA	b3853	alaT	4037268	4037331	+	GCTCAGCTGGGAGAGCGCCTGCTTTGCACGCAGGAGGTCTGCGGTTCGATCCCGCATAGCTCC	0	0	1	1	TAGTTCAGTCGGTAGAACGGCGGACTGTTAATCCGTATGTCACTGGTTCGAGTCCAGTCAGAGGAGCC&GCTCAGCTGGGAGAGCGCCTGCTTTGCACGCAGGAGGTCTGCGGTTCGATCCCGCATAGCTC	.((((..(.(((..((((.(((((((.....(((((.(((....(((.(...(((...(((..((((.&))))..))))))..).)))......))).)).)))))))))).))))....))))..)))).	-42.9	No	No	Yes
1315570_1	ncRNA	b4585	chiX	507216	507288	+	AAGTGACGGCATAATAATAAAAAAATGAAATTCCTCTTTGACGGGCCAATAGCGATATTGGCCATTTTTTTA	rRNA	b3758	rrlC	3943698	3943767	+	TGTGAGGTTAAGCGACTAAGCGTACACGGTGGATGCCCTGGCAGTCAGAGGCGATGAAGGACGTGCTAA	0	0	2	1	CGGCATAATAATAAAAAAATGAAATTCCTCTTTGACGGGCCAATAGCGATATTGGCCA&CGGTGGATGCCCTGGCAGTCAGAGGCGATGAAGGACGTGCTA	.(((((...................((.((((((((..((((...((...(((.(((.&.))).)))))..)))).)))))))).))........))))).	-25.7	Yes	No	No
1316041_1	antisense_protein_coding	antisense-b1498	antisense-b1498	1581861	1581878	+	GCCACGGTTTTGAGGTT	ncRNA	b4443	gcvB	2942756	2942804	+	CGGTTGTGATGTTGTGTTGTTGTGTTTGCAATTGGTCTGCGATTCAGA	3.92775e-14	5.96595e-14	1	1	GCCACGGT&GTTGTGTTTGCA	(((((((.&.)))))...)).	-4.1	No	Yes	No
1316141_1	antisense_protein_coding	antisense-b0326	antisense-b0326	344706	344723	-	TGCATACACTCTTTCCC	ncRNA	b4443	gcvB	2942756	2942786	+	CGGTTGTGATGTTGTGTTGTTGTGTTTGCA	0	0	1	1	TGCATACACT&TGTGTTTGCA	((((.((((.&.)))).))))	-9.2	No	Yes	No
1316877_1	ncRNA	b4585	chiX	507230	507288	+	TAATAAAAAAATGAAATTCCTCTTTGACGGGCCAATAGCGATATTGGCCATTTTTTTA	protein_coding	b1190	dadX	1239079	1239135	+	CGTGAGCGCGGCTGGAAAGGACCGATCCTGATGCTGGAAGGATTTTTCCATGCTCA	5.05638e-301	1.45507e-300	1	1	TGAAATTCCTCTTTGACGGGCCAATAGCGATATTGGCCATT&CGTGAGCGCGGCTGGAAAGGACCGATCCTGATGCTGGAAGGATTTTTCC	.((((.((((((..(((((.((..((((.......(((((.&.))).))...))))....)).))).))........))).)))..)))).	-17.3	No	Yes	No
1317207_1	protein_coding	b0494	tesA	519761	519804	-	GGAGAGTTCATGCTCCCCCTGACCGACGGACTTCTTAAGATGA	rRNA	b3756	rrsC	3942670	3942699	+	AACGCGTTAAGTCGACCGCCTGGGGAGTA	0.000243042	0.000318496	2	1	ATGCTCCCCCTGACCGACGGACT&CGTTAAGTCGACCGCCTGGGGAGTA	.((((((((.((..((((.(((.&.)))..))))..))...))))))))	-21.1	No	No	Yes
1317208_1	protein_coding	b0494	tesA	519761	519798	-	TTCATGCTCCCCCTGACCGACGGACTTCTTAAGATGA	rRNA	b4007	rrsE	4209009	4209038	+	AACGCGTTAAGTCGACCGCCTGGGGAGTA	1.17926e-05	1.59437e-05	1	1	ATGCTCCCCCTGACCGACGGACT&CGTTAAGTCGACCGCCTGGGGAGTA	.((((((((.((..((((.(((.&.)))..))))..))...))))))))	-21.1	No	No	Yes
1317479_1	ncRNA	b4438	cyaR	2167180	2167200	+	CTTACACGGGCTTATTTTTT	protein_coding	b3516	gadX	3664944	3665008	-	CTGCGGAAGGAATAAGATTATAGAGTTTTACTCAGACATAAAAAAAACCCGGCATAGGGGACCG	0	0	1	1	CTTACACGGGC&ACCCGGCATAGGG	((((..((((.&.))))...)))).	-9.2	No	Yes	No
1317535_1	protein_coding	b4484	cpxP	4106311	4106346	+	TCCCAGTAGTAAACCCTGTTTTCCTTGCCATAGAC	rRNA	b4007	rrsE	4208243	4208275	+	ACGAGTGGCGGACGGGTGAGTAATGTCTGGGA	0	0	1	1	TCCCAGTAGTAAACCCTGTTTTCCTTGCCATA&AGTGGCGGACGGGTGAGTAATGTCTGGGA	((((((..((..((((.(((.....((((((.&.))))))))))))).....))..))))))	-23.9	No	No	Yes
1317539_1	protein_coding	b4484	cpxP	4106311	4106346	+	TCCCAGTAGTAAACCCTGTTTTCCTTGCCATAGAC	rRNA	b3968	rrsB	4166755	4166787	+	ACGAGTGGCGGACGGGTGAGTAATGTCTGGGA	0	0	2	1	TCCCAGTAGTAAACCCTGTTTTCCTTGCCATA&AGTGGCGGACGGGTGAGTAATGTCTGGGA	((((((..((..((((.(((.....((((((.&.))))))))))))).....))..))))))	-23.9	No	No	Yes
1317541_1	rRNA	b3851	rrsA	4035627	4035659	+	ACGAGTGGCGGACGGGTGAGTAATGTCTGGGA	protein_coding	b4484	cpxP	4106311	4106346	+	TCCCAGTAGTAAACCCTGTTTTCCTTGCCATAGAC	0	0	2	1	AGTGGCGGACGGGTGAGTAATGTCTGGGA&TCCCAGTAGTAAACCCTGTTTTCCTTGCCATA	.(((((((((((((.....((..((((((&))))))..))..)))).))).....)))))).	-23.9	No	No	Yes
1317721_1	5UTR	b1243	oppA	1301127	1301170	+	GGATTACACATGCTGGTTAATACCAGTAATTATAATGAGGGAG	protein_coding	b4208	cycA	4429812	4429867	+	CTAAAGGCCGTAGAGCCTGAACAACACAGACAGGTACAGGAAGAAAAAAACATGG	0	0	1	1	ACATGCTGGTTAATACCAGTAATTATAATGAGGGA&GCCTGAACAACACAGACAGGTACAGGAAGAAAAAAACATGG	.(((((((.....((((.((...........(((.&.)))...........)).)))))))...........)))).	-9.3	No	Yes	No
1318697_1	5UTR	b1838	pphA	1923104	1923128	-	CAGGAATCGTGTTCGGTCTCTTTT	protein_coding	b4016	aceK	4218893	4218964	+	AGAGCTTTTTTAACTCCGTGTACTGTCGGTTATTTGACCACCGCTCGCTTACTCCCGAGCGGCTTTTTATC	0	0	1	1	AGGAATCGTGTTCGGT&CCCGAGCGGCTTTTTA	.((((...(((((((.&.)))))))...)))).	-10.9	No	No	Yes
131911_19	protein_coding	b0019	nhaA	18596	18679	+	AGATTTCCTGGTGTAACG	protein_coding	b2699	recA	2822815	2822867	-	TCACTGTTAGATTTCCT	4.37524e-09	6.30132e-09	7	1	AGATTTCCTGGTGT&TCACTGTTAGATTTCC	.((..((.(((((.&.)))))...))..)).	-4.9	No	Yes	No
13191_308	ncRNA	b1954	dsrA	2025287	2025305	-	AGATTTCCTGGTGTAACG	protein_coding	b4145	yjeJ	4373743	4373760	-	TCACTGTTAGATTTCCT	0	0	2	1	AGATTTCCTGGTGT&TCACTGTTAGATTTCC	.((..((.(((((.&.)))))...))..)).	-4.9	No	Yes	No
1319355_1,100910_2	inter	int-4260-1	int-4260-1	3943333	3943383	+	TTGGATCACCTCCTTACCTTAAAGAAGCGTTCTTTGCAGTGCTCACACAG	3UTR	b3850	hemG	4035415	4035462	+	TGTGGGCACTCGAAGATACGGATTCTTAACGTCGCAAGACGAAAAAT	6.95084e-80	1.33342e-79	31	2	AAAGAAGCGTTCTTTGCAGTGCTCACAC&TGTGGGCACTCGAAGATACGGATTCTTA	.(((((.(((((((((.((((((((((.&)))))))))))))))).)))..))))).	-29	Yes	Yes	No
1319356_1,121584_2	inter	int-4260-1	int-4260-1	3943333	3943383	+	TTGGATCACCTCCTTACCTTAAAGAAGCGTTCTTTGCAGTGCTCACACAG	inter	int-2044-1	int-2044-1	4208031	4208078	+	TGTGGGCACTCGAAGATACGGATTCTTAACGTCGCAAGACGAAAAAT	2.97621e-83	5.77893e-83	31	2	AAAGAAGCGTTCTTTGCAGTGCTCACAC&TGTGGGCACTCGAAGATACGGATTCTTA	.(((((.(((((((((.((((((((((.&)))))))))))))))).)))..))))).	-29	Yes	Yes	No
1320056_1	tRNA	b0668	glnW	696756	696790	-	GGCATTCCCTGGTTCGAATCCAGGTACCCCAGCC	rRNA	b2589	rrlG	2728399	2728439	-	TTGAAAAATTAGCGGATGACTTGTGGCTGGGGGTGAAAGG	1.36417e-303	3.94075e-303	2	1	ACCCCAGCC&TGGCTGGGGG	.((((((((&.)))))))).	-18.3	No	Yes	Yes
1320103_1	rRNA	b0201	rrsH	223789	223819	+	TGGCTCAGATTGAACGCTGGCGGCAGGCCT	protein_coding	b0733	cydA	772248	772270	+	TGCGCCTGCTGCCTTTACTCTG	2.84044e-14	4.32316e-14	1	1	TCAGATTGAACGCTGGCGGCAGGCC&CGCCTGCTGCCTTTACTCTG	.((((.((((....((((((((((.&.)))))))))))))).))))	-25.4	No	Yes	No
132045_1	5UTR	b2573	rpoE	2710146	2710192	-	AGATTCTGTAGACTTATAATGATAGATAATGATCCGTCTACAGCAT	3UTR	b4484	cpxP	4106330	4106369	+	TTTCCTTGCCATAGACACCATCCCTGTCTTCCCCCACAT	0	0	1	1	TGATAGATAATGATCCGTCTACAGCAT&TTGCCATAGACACCATCCCTGTCTTCC	.((.(((((..(((..(((((..(((.&.)))..)))))...)))..))))))).	-13.5	Yes	No	No
1320863_1	5UTR	b0440	hupB	461397	461420	+	TTCGTACCTTGAAGGATTCAAGT	ncRNA	b4691	sroH	4190362	4190429	-	ATCCCGCAACCTGCGATTATCGCAAGGTCAAGGCAAAGTCCGGTAATGGCGTTCTGAATACCAGAGA	0	0	1	1	TTCGTACCTTGAAGGATT&ATCCCGCAACCTGCGAT	.(((((..(((..((((.&))))..)))..))))).	-10.8	Yes	No	No
132086_17	3UTR	b0958	sulA	1020225	1020243	-	AGATTCTGTAGACTTATAATGATAGATAATGATCCGTCTACAGCAT	protein_coding	b0967	rlmI	1028847	1028864	-	TTTCCTTGCCATAGACACCATCCCTGTCTTCCCCCACAT	0.0117842	0.0144158	2	1	TGATAGATAATGATCCGTCTACAGCAT&TTGCCATAGACACCATCCCTGTCTTCC	.((.(((((..(((..(((((..(((.&.)))..)))))...)))..))))))).	-13.5	No	Yes	No
1321123_1	pseudogene	b2092	gatC	2172888	2172929	-	GCAGAATAATTTTTACCTGAGGGGGAGGTTATCCCCCTTAA	ncRNA	b4408	csrB	2924219	2924282	-	CAGGATGAACGATTGGCCGCAAGGCCAGAGGAAAAGTTGTCAAGGATGAGCAGGGAGCAACAA	4.53371e-89	9.62531e-89	1	1	AATAATTTTTACCTGAGGGGGAGGTTATCCCCCTT&CAGGATGAACGATTGGCCGCAAGGCCAGAGGAAAAGTTGTC	.(((((((((.(((..((..(.(((((((..(((.&.)))..)).....))))).)....))..)))))))))))).	-18.8	No	No	Yes
1321329_1	protein_coding	b1650	nemA	1727714	1727789	+	GGTGGCGGCGCGGAAGGCTATACCGATTACCCGACGTTGTAATCCAACATTGCGAGCGGCGTAAAGCCGCCGCTA	ncRNA	b4704	arrS	3657987	3658053	-	TAATCCGATTTAAATATCGAGTCTCCTTGTTTCGACTTAAGCTGGCAATTGGATTGCCAGCTTTCT	3.15275e-31	5.39475e-31	2	1	CGGAAGGCTATACCGATTACCCGACGTTGTAATCCAACATTGCGAGCGGCGTAAAGCCGCCGCTA&GAGTCTCCTTGTTTCGACTTAAGCTGGCAATTGGATTGCCAGCTTTCT	.((((((((...................((((((((..(((((.(((...((.((((.(..(((.&.)))..)...))))..))....))).))))))))))))).))))))))	-29.1	No	Yes	Yes
1321415_1	ncRNA	b4704	arrS	3657984	3658053	-	TAATCCGATTTAAATATCGAGTCTCCTTGTTTCGACTTAAGCTGGCAATTGGATTGCCAGCTTTCTTTT	protein_coding	b3752	rbsK	3937780	3937843	+	TTGCGCTTAACCCGGCTCCGGCTCGCGAACTTCCTGACGAACTGCTGGCGCTGGTGGACATTA	2.03497e-38	3.60455e-38	1	1	TTCGACTTAAGCTGGCAATTGGATTGCCAGCTT&CGGCTCGCGAACTTCCTGACGAACTGCTGGCGCTGGTGGAC	.((.(((...(((((((.(((((((((.((((.&.)))).))))...))).....)).)))))))...))).)).	-24.5	Yes	No	No
1322347_1	5UTR	b0440	hupB	461349	461389	+	TTAAGGGGTGTTGTAAGGGGATGGCTGGCCTGATATAACT	ncRNA	b4585	chiX	507220	507261	+	GACGGCATAATAATAAAAAAATGAAATTCCTCTTTGACGGG	0	0	1	1	GTGTTGTAAGGGGATGGCTGG&ACGGCATAATAATAAAAAAATGAAATTCCTCTTTGACGG	.(((((.(((((((..((((.&.)))).....................)))))))))))).	-13.4	No	Yes	No
1322438_1	inter	int-1767	int-1767	3657982	3658055	-	TGTAATCCGATTTAAATATCGAGTCTCCTTGTTTCGACTTAAGCTGGCAATTGGATTGCCAGCTTTCTTTTAA	tRNA	b3799	proM	3982705	3982756	+	TTGAACTAAAAATTCAAAAAGCAGTATTTCGGCGAGTAGCGCAGCTTGGTA	0	0	8	1	ATATCGAGTCTCCTTGTTTCGACTTAAGCTGGCAATTGGATTGCCAGCTTTCT&TGAACTAAAAATTCAAAAAGCAGTATTTCGGCGAGTAGCGCAGCTTGGTA	.((((((((((.(((((..(((.....((((....(((((((...((..(((.&.)))))...)))))))....))))...)))))))).))....))))))))	-21.3	Yes	Yes	Yes
1322441_1	5UTR	b1661	cfa	1741260	1741292	+	CTATGGATAGTCATTTCGGCAAGGGTTCCTCC	protein_coding	b3729	glmS	3913557	3913592	-	ACCGCGGATATGACTCTGCCGGTCTGGCCGTTGTT	3.5864e-224	9.50756e-224	1	1	GGATAGTCATTTCGGCAAGGGTTCCTCC&CGGATATGACTCTGCCGGTCTGGCCGTTG	.(((.((((..(((((.((((((..(((&.)))...)))))))))))..)))).))).	-21	No	Yes	No
1322475_1	protein_coding	b1051	msyB	1113938	1113964	-	AAAGTGTTTTTGATGGCGACTATGAT	protein_coding	b4171	miaA	4399904	4399938	+	TCATCAGATGTTGGCTTCAGGTTTTGAAGCAGAA	2.453856e-316	7.16583233e-316	1	1	GTGTTTTTGATGGCGACTATGAT&CATCAGATGTTGGCTTCAGGTTTTGAAGCAG	.(((((((((.(.((((..((((&.))))...)))).).)))......)))))).	-12.6	No	Yes	No
1322484_1	tRNA	b1986	asnU	2059869	2059926	+	TAGAACGGCGGACTGTTAATCCGTATGTCACTGGTTCGAGTCCAGTCAGAGGAGCCA	ncRNA	b4442	micA	2814830	2814874	+	TGAATTCAGAGATGAAATTTTGGCCACTCACGAGTGGCCTTTTT	0	0	1	1	TGTCACTGGTTCGAGTCCAGTCAGAGG&ATTTTGGCCACTCACGAGTGGCC	.((((((.((..((((...(((((((.&.))))))).)))))).)))))).	-19.8	No	Yes	No
132268_14	inter	int-3193-1	int-3193-1	1985070	1985092	+	ACGTCTCCGTGAATCACTGGTC	protein_coding	b2027	wzzB	2098013	2098038	-	ATCGGATTTGCAGGAGACGTTAATT	1.40393e-87	2.96887e-87	3	1	ACGTCTCCGTGAATCA&GGATTTGCAGGAGACGTT	(((((((((((((((.&.))))))).)))))))).	-20.4	Yes	No	No
132307_18	protein_coding	b1244	oppB	1303379	1303411	+	TGCCGGGCGGTGGCTGGAATGGTGGGGCGCTT	tRNA	b2590	gltW	2729407	2729435	-	GTCTAGAGGCCCAGGACACCGCCCTTTC	2.99592e-57	5.73142e-57	3	1	CGGGCGGTGGCTGGAATGGTGGGGCG&GTCTAGAGGCCCAGGACACCGCCCT	.((((((((.((((.......((((.&))))......))))..)))))))).	-28.2	No	No	Yes
1323488_1	tRNA	b3799	proM	3982799	3982842	+	TCTCGCCGACCAATTTTGAACCCCGCTTCGGCGGGGTTTTTTG	rRNA	b3970	rrlB	4171472	4171528	+	TGATAGGCCGGGTGTGTAAGCGCAGCGATGCGTTGAGCTAACCGGTACTAATGAAC	0	0	1	1	CGCCGACCAATTTTGAACCCCGCTTCGGCG&GGCCGGGTGTGTAAGCGCAGCGATGCGTTGAGCT	.((((((((...(((.....(((((((((.&.)))))).)))......)))...)).)))).)).	-18.5	No	No	Yes
1323540_1	tRNA	b3277	ileU	3427097	3427116	-	TAAGGGTGAGGTCGGTGGT	ncRNA	b3864	spf	4049968	4049988	+	TTTAGCCGCCCCAGTCAGTA	0	0	1	1	AGGGTGAGGTCGGTG&AGCCGCCCCAGTCA	.((.((.((.((((.&.)))))).)).)).	-12.5	Yes	No	No
132356_1	protein_coding	b0740	tolB	779003	779034	+	AATTCCCTGCCTGGTCGCCGTATCTGTGATA	rRNA	b3275	rrlD	3426329	3426354	-	ATACTCCTGACTGACCGATAGTGAA	0	0	1	1	ATTCCCTGCCTGGTCGC&CTGACCGATAGTGAA	.(((.(((..((((((.&.)))))).))).)))	-8.7	Yes	No	No
1323573_1	ncRNA	b4704	arrS	3657983	3658054	-	GTAATCCGATTTAAATATCGAGTCTCCTTGTTTCGACTTAAGCTGGCAATTGGATTGCCAGCTTTCTTTTA	protein_coding	b4034	malE	4245699	4245759	-	CTGGTTGACCTGATTAAAAACAAACACATGAATGCAGACACCGATTACTCCATCGCAGAA	1.18739e-142	2.82095e-142	1	1	CCGATTTAAATATCGAGTCTCCTTGTTTCGACTTAAGCTGGCAATTGGA&CTGGTTGACCTGATTAAAAACAAACACATGAATGCAGACACCGATTACTCCATCGC	.((((......((((.((((.(((((((....((((...(((((((((.&))))))).))...))))))))))..........).))))..))))......)))).	-17.8	No	Yes	No
1323809_1	rRNA	b2589	rrlG	2729053	2729075	-	GATTTCCGAATGGGGAAACCCA	ncRNA	b4445	omrB	2976360	2976381	-	GAGGTATTGATAGGTGAAGTC	0	4.2416e-308	1	1	GATTTCCGAATGGGGAAACCCA&GAGGTATTGATAGGTGAAGTC	(((((((..((.((...((((.&).))).)).))..).))))))	-7.9	No	Yes	No
132380_19	antisense_protein_coding	antisense-b0277	antisense-b0277	292470	292503	+	GTAATCCGATTTAAATATCGAGTCTCCTTGTTTCGACTTAAGCTGGCAATTGGATTGCCAGCTTTCTTTTA	ncRNA	b4443	gcvB	2942842	2942884	+	CTGGTTGACCTGATTAAAAACAAACACATGAATGCAGACACCGATTACTCCATCGCAGAA	2.0734e-83	4.33088e-83	10	1	CCGATTTAAATATCGAGTCTCCTTGTTTCGACTTAAGCTGGCAATTGGA&CTGGTTGACCTGATTAAAAACAAACACATGAATGCAGACACCGATTACTCCATCGC	.((((......((((.((((.(((((((....((((...(((((((((.&))))))).))...))))))))))..........).))))..))))......)))).	-17.8	No	Yes	No
1324647_1,191509_1	rRNA	b3759	rrfC	3946755	3946822	+	AAACGCCGTAGCGCCGATGGTAGTGTGGGGTCTCCCCATGCGAGAGTAGGGAACTGCCAGGCATCAA	rRNA	b3855	rrfA	4040514	4040555	+	TTTGCCTGGCGGCAGTAGCGCGGTGGTCCCACCTGACCCCA	5.56137e-289	1.578e-288	4	2	TGGTAGTGTGGGGTCTCCCCATGCGAGAGTAGGGAACTGCCAGGCAT&TTGCCTGGCGGCAGTAGCGCGGTGGTCCCACCTGACCC	.(((((.((((((...((((.(((............((((((((((.&.)))))))))).....))).)).))))))))))).)).	-38.8	Yes	Yes	Yes
132480_2	protein_coding	b0741	pal	779521	779552	+	ACCTGCAGTACTGGGTCATGACGAAGCGGCA	antisense_protein_coding	antisense-b1806	antisense-b1806	1890452	1890469	+	GGCACAGTGACACAACC	0	0	3	1	CTGCAGTACTGGGTCA&GGCACAGTGACACAA	.((...(((((.(((.&))).)))))...)).	-9.2	No	Yes	No
1324961_1	protein_coding	b4598	yncL	1517117	1517154	-	TTGCTGCTGTTGGTTTGTTTACTCTTATCTCTATGAG	ncRNA	b4704	arrS	3657983	3658054	-	GTAATCCGATTTAAATATCGAGTCTCCTTGTTTCGACTTAAGCTGGCAATTGGATTGCCAGCTTTCTTTTA	0	0	1	1	TGCTGCTGTTGGTTTGTTTACTCTTATCTCTATGAG&CCTTGTTTCGACTTAAGCTGGCAATTGGATTGCCAGCT	.(((((.(((.(.(((((....((((..((.(((((&.)))))...))..))))..))))).).))).)).))).	-15.1	No	No	Yes
1325007_1	5UTR	b1838	pphA	1923104	1923149	-	GCCATTTCCCTGGACCGAATACAGGAATCGTGTTCGGTCTCTTTT	protein_coding	b3430	glgC	3568305	3568334	-	CACTGGTTTCCGGCGGTTGTGTGATCTCC	4.79753e-182	1.205e-181	1	1	CCATTTCCCTGGACCGAATACAGG&ACTGGTTTCCGGCGGTTGTGT	.(((..(((((((....(..(((.&.)))..)))))).))..))).	-13.5	No	Yes	No
132512_9	protein_coding	b4472	yhdP	3395999	3396031	-	ACTAAAAGATGGCGGCGAATTTTCGGTTAAAC	protein_coding	b3616	tdh	3790607	3790632	-	AATGTCCGGTGCGCCGCCAGCGTTT	0.00310568	0.00391865	2	1	ATGGCGGCGAATTTTCGGT&TCCGGTGCGCCGCCAG	.((((((((.....((((.&.))))..)))))))).	-21.2	No	Yes	No
132516_9	ncRNA	b4420	rdlA	1269333	1269360	+	AGATTAGCCCCCGTTCTGTTGTCAGGT	rRNA	b3851	rrsA	4036448	4036476	+	ATTGACGGGGGCCCGCACAAGCGGTGGA	4.42539e-198	1.13625e-197	1	1	AGCCCCCGTTC&TGACGGGGGCC	.(((((((((.&.))))))))).	-19.4	No	Yes	No
1325401_1	3UTR	b2904	gcvH	3049094	3049157	-	GCTTTATTCCTCTTCTGCGGGAGAGGATCAGGGTGAGGAAAATTTATGCCTCACCCTCACTCT	protein_coding	b3460	livJ	3599652	3599717	-	AAGTGCTGAAAAACAACATCACAACACACGTAATAACCAGAAGAATGGGGATTCTCAGGATGAAC	3.95996e-211	1.03408e-210	1	1	TATTCCTCTTCTGCGGGAGAGGATCAGGGTGAGGAAAATTTATGCCTC&AAGTGCTGAAAAACAACATCACAACACACGTAATAACCAGAAGAATGGGGATT	.((((((((((((.(..(..........((((......(((..((((.&.)).))..))).......))))...........)..))))))))...))))).	-18.6	No	Yes	No
1325819_1	inter	int-1079	int-1079	2057927	2057951	-	TAAAAAAGTGACCGGGTTTTTTGA	ncRNA	b3864	spf	4049901	4049987	+	GGGTACAGAGGTAAGATGTTCTATCTTTCAGACCTTTTACTTCACGTAATCGGATTTGGCTGAATATTTTAGCCGCCCCAGTCAGT	0	0	2	1	AAGTGACCGGGT&CCCCAGTCAGT	.(.((((.(((.&.))).)))).)	-10.2	No	Yes	Yes
1326029_1	protein_coding	b0892	rarA	938146	938167	+	TCTATGATCCTCTGGGGGCCG	ncRNA	b4445	omrB	2976340	2976385	-	CCCAGAGGTATTGATAGGTGAAGTCAACTTCGGGTTGAGCACATG	1.52628e-58	2.93561e-58	6	1	TCTATGATCCTCTGGGG&CCCAGAGGTATTGATAGGT	((((((((((((((((.&)))))))).))).))))).	-20.1	No	Yes	Yes
1326167_1,638865_1	ncRNA	b4443	gcvB	2942695	2942780	+	ACTTCCTGAGCCGGAACGAAAAGTTTTATCGGAATGCGTGTTCTGGTGAACTTTTGGCTTACGGTTGTGATGTTGTGTTGTTGTG	antisense_ncRNA	antisense-b4452	antisense-b4452	3664889	3664973	-	ACATAAAAAAAACCCGGCATAGGGGACCGGGAAGAGGATAGTCTGCCGTCTCCAGACTAATAAACCGTTATAACACTCCCTGTT	0	0	3	2	GAGCCGGAACGAAAAGTTTTATCGGAATGCGTGTTCTGGTGAACTTTTGGCTTACGGTTGTGATGTTGTGTTGTTGTG&ACATAAAAAAAACCCGGCATAGGGGACCGGGAAGAGGATAGTCTGCCGTCTCCAGACTAATAAACCGTTATAACACTCCCTGTT	.(((.((...((...(((.((.(((.......(.(((((.(((((.((..(((.(((((.(.((((((.(((.(((((&.)))))....))).))))))..).)))))..)))..)).)))......)).)))))).......))).)).)))..)))).)))	-31.1	No	Yes	No
1326271_1	protein_coding	b2966	yqgA	3109829	3109866	+	CACGTAAGAAGCCAGCGCATGAATCTTTTATTCAGAA	antisense_protein_coding	antisense-b4257	antisense-b4257	4479945	4479980	-	AAAAAAACAAAAAAAAGACAACTAACAAAAACATT	0.0357343	0.0422074	1	1	ATCTTTTA&AAAAAGAC	.((((((.&.)))))).	-3.7	Yes	No	No
1326351_1	ncRNA	b4443	gcvB	2942695	2942719	+	ACTTCCTGAGCCGGAACGAAAAGT	protein_coding	b3894	fdoG	4085769	4085843	-	TGTCGAAACAAGGAGCAATCCATGCAGGTCAGCAGAAGGCAGTTCTTTAAGATCTGCGCTGGCGGTATGGCAGG	0	0	1	1	ACTTCCTGAGCCGGAACGAAAAGT&TCTTTAAGATCTGCGCTGGCGGTA	(((.((..(((((((.(..((((.&.))))..).)))).))))).))).	-12.5	No	Yes	No
1326647_1	antisense_protein_coding	antisense-b2242	antisense-b2242	2354623	2354640	-	AACTTAGCCAGGTAGAG	tRNA	b3976	thrU	4175404	4175430	+	GGTAGAGCAACTGACTTGTAATCAGT	0	0	1	1	ACTTAGCCA&GGTAGAGC	.(((.(((.&))).))).	-6	No	No	Yes
1326683_1	3UTR	b0552	insH1_2	574366	574419	-	CTTCTGTTATATATTACCCTTTATTTTTGGGGGCGTCTCAACGCCCCATTTTT	protein_coding	b1641	slyB	1720032	1720105	+	TTCAGGGCGGTGATGATTCCAACGTTATCGGTGCAATTGGCGGTGCTGTTCTTGGTGGTTTCCTGGGGAATAC	0	0	1	1	TCTGTTATATATTACCCTTTATTTTTGGGGGCGTCTCAACGCCCC&AGGGCGGTGATGATTCCAACGTTATCGGTGCAATTGGCGGT	.((((((.....((((........((((((.((((....(((((.&.)))))..)))).)))))).......))))....)))))).	-26.4	No	Yes	No
[truncated: 6,916 more rows]
