# Supplementary material for: Hfq CLASH uncovers sRNA-target interaction networks linked to nutrient availability adaptation
Source: eLife. 2020 May 1;9:e54655. doi: 10.7554/eLife.54655 (PMC7213987; doi:10.7554/eLife.54655)
Supplement: Supplementary file 3. — Shown are the statisitcally filtered sRNA-mRNA interactions identified in the Hfq CLASH data. Genomic sequences of the sRNA and mRNA fragments found in the chimeras are also provided. Total_hybrids indicates the total number of interactions involving these sequences that were found. Min. MFE indicates the minimal folding enrgies of the chimera, which was calculated using RNADuplex from the ViennaRNA package (Lorenz et al., 2011). The last column indicates which of the sRNA-mRNA interactions were also found in the RIL-seq S-chimera data (Melamed et al., 2016). [file elife-54655-supp3.xlsx]

## Sheet: Supplementary File 3
Supplementary File 3. Overview of sRNA-mRNA interactions found in the Hfq CLASH data and compared to the RIL-seq data					References:
Shown are the statisitcally filtered sRNA-mRNA interactions identified in the Hfq CLASH data.					[1] Lorenz, R. et al. ViennaRNA Package 2.0. Algorithms Mol. Biol. (2011). doi:10.1186/1748-7188-6-26
Genomic sequences of the sRNA and mRNA fragments found in the chimeras are also provided.					[2] Melamed, S., Peer, A., Faigenbaum-Romm, R., Gatt, Y. E., Reiss, N., Bar, A., … Margalit, H. (2016). Global Mapping of Small RNA-Target Interactions in Bacteria. Molecular Cell, 63(5), 884–897.
Total_hybrids indicates the total number of interactions involving these sequences that were found.
Min. MFE indicates the minimal folding enrgies of the chimera, which was calculated using RNADuplex from the ViennaRNA package [1]
The last column indicates which of the sRNA-mRNA interactions were also found in the RIL-seq S-chimera data [2]
	sRNA	mRNA	sRNA fragment (5'-3')	mRNA fragment (5'-3')	total_hybrids	min. MFE	in RIL-seq?	Exponential Phase	Transition Phase	Stationary Phase
	ryeA	malM	AAGTCAGCGAAGGAAATGCTTCTGGCTTTTAACAGATAAAAAGAGACCGAACACGATTCCT	AAGGGGTAATTACGCCCCACAGTGCTGATTTTGCAACAACTGGTGCGTCTCCTGGCGCACCTTTTTT	1	-19.2	No	No	No	Yes
	chiX	ygaZ	AAGTGACGGCATAATAATAAAAAAATGAAATTCCTCTTTGACGGGCCAATAGCGATATTGGCCATTTTTT	GGTTTTATGCTTCCGGCACTCTTTATGAGT	1	-16.7	No	No	Yes	No
	arcZ	ymgG	CCCTGGTGTTGGCGCAGTATTCGCGCACCCCGGTC	GCTGGTGTTGGTGCAGT	1	-13.7	No	No	Yes	No
	dsrA	intA	CACATCAGATTTCCTGGTGTAACGAATTTTTTAAGTGCTTC	CTCGTAAAAGCAGCAGATAGT	1	-9.9	No	No	Yes	No
	spf	rplC	CTGAATATTTTAGCCGCCCCAGTCAGT	GAAGACGGCGTTTCTAT	1	-9.3	No	No	Yes	No
	gadY	focA	GGGAGTGTTATAACGGTTTATTAGTCTGGAGACG	TGGCCGAAGAGGCGGGTGTCT	1	-6.8	No	No	Yes	No
	gcvB	rpoB	TTTATCGGAATGCGTGTTCTGGTGAACTTTTGGCTTACGGTTGTGATG	GGTCAGCGTTTCGGGGAGATGGAAGTGTGG	1	-15.2	No	No	Yes	No
	arrS	lptF	GTAATCCGATTTAAATATCGAGTCTCCTTGTTTCGACTTAAGCTGGCAATTGGATTGCCAGCTTTCTTTTA	CTCTTCATCTTGCTTTTGATCTTCTTCTGTCA	1	-9.6	No	No	Yes	No
	gcvB	ygiV	CTTCCTGTACATTTACCCTGTCTGTCCATAGTGATTAATGTAGCACCGCCTAATTGCGGTGCTTT	AGGGAGGCAAAATGACAAACCTGACACTGGATGTAAACATTATCGATTTCCCATCAATACCTGTGGCGAT	1	-17.7	No	No	Yes	No
	gadY	nuoF	ACGGTTTATTAGTCTGGAGACGGCAGACT	AAGGCGCTGACCGGGCTGTCTCCGGACGAAAT	5	-26.1	No	No	Yes	No
	cyaR	ydjA	CTGAAAAACATAACCCATAAAATGC	AAACATCCTGCGTGCGGGTATGCGTG	1	-9.1	No	No	Yes	No
	omrB	ompA	CCCAGAGGTATTGATAGGTGAAGT	GAAAAAGACAGCTATCGCGATTGCAGTGGCACTGGCTGGTTTCGCTACCGTAGCGCAGGCCGCTCCGAA	1	-16.3	No	No	No	Yes
	omrB	ytfF	AGAGGTATTGATAGGTGAAGT	TCTGATGGTTGCGATAG	1	-2.8	No	No	Yes	No
	ssrS	raiA	GAGTAACCGTGAAGACAAAATTTCTCTGAGATGTTCGCAAGCGGGCCAGTCCC	GAAGAGTAGTCCTTTATATTGAGTGTATCGCCAACGCGCCTTCGGGCGCGTTTTTT	1	-15.5	No	No	Yes	No
	arcZ	oppF	TTCCCTGGTGTTGGCGCAGTATTCGCGC	CTGGGCATGAAACCCGATGAATGGCGTGCCGTTCGCAGTGATATTCA	1	-20	No	No	Yes	No
	mgrR	ycjG	AAGCATTCACCGCCGGTTT	GGTCAGTTTCGCCGATCTTGACGGACCGACCTGGCTGGCGGTAGATG	1	-19.8	No	No	Yes	No
	arrS	rfbA	AATATCGAGTCTCCTTGTTTCGACTTAAGCTGGCAATTGGATTGCCAGCTTTCTTTT	ATGATGAAATGAAAATGCGTAAAGGTATTATTTTAGCGGGTGGTTCTGGTACACG	1	-13	No	No	Yes	No
	spf	uidC	TAGGGTACAGAGGTAAGATGTTCTATCTTTCAGACCTTTTACTTCACGTAATCGGATTTGGCTGAAT	TTATTTGCCTGACGGCTGCCTCTGGCCTTACCTCT	1	-20.9	No	Yes	No	No
	spf	yifK	TACAGAGGTAAGATGTTCTATCTTTCAGACCTTTTACTTCACG	ATTCCCAATCCGCAGCGTGTGTTTGTCTACGTCTACAGTG	1	-10.9	No	Yes	No	No
	arcZ	sppA	TTCCCTGGTGTTGGCGCAGT	CTATCACCAGGGCACTG	2	-17.5	Yes	Yes	No	No
	chiX	yfhM	ACGGCATAATAATAAAAAAATGAAATTCCTCTTTGACGGGCCAATAGCGATATTGGCCATTTTTTTA	CAACCGATGGTGGAATCAATGTATGTTCCCCAATGGCGGGCGAC	1	-17.9	No	No	No	Yes
	ryeA	lhr	GCTTCTGGCTTTTAACAGATAAAAAGAGACCGAACACGATTCCTGTATTCGGTCCAGGGAAATGGCTCTTGGG	ACGACCACTACGCCCTCGCCTTTCGCCACAAGTTT	1	-15.6	No	No	No	Yes
	arrS	tnaB	GTAATCCGATTTAAATATCGAGTCTCCTTGTTTCGACTTAAGCTGGCAATTGGATTGCCAGCTTTCTTTT	TGTTTGCTTTACCTGTTGATCTTGCCGGTGCCTGGTTTTTCTGGGGTGC	1	-23.7	No	No	Yes	No
	omrA	tolB	CGGTACGCTCTTCGTACCCTGTCTCTTGCACCAACCTGCGCGGATGCGCAGGTTTTTTTTC	GGGGATGGGATCCGTGCTGAATTTGGTTTCTACAGATGGGCGTTTCAAAGCGCGTCTTCC	1	-37.3	No	No	Yes	No
	ryeA	aceK	GCTTCTGGCTTTTAACAGATAAAAAGAGACCGAACACGATTCCTGTATTCGGTCCAGGGAAATGGCTCTTGGG	AGATTGCGGAGAGCTTTTTTAACTCCGTGTACTGTCGGTTATTTGACCACCGCTCGCT	2	-29.8	No	No	No	Yes
	gadY	pka	GTCTGGAGACGGCAGACTATCCTCTTCCCGGTCCCCTA	AATCGGCTGCCGTCTCCAACACCATC	8	-28.4	No	No	Yes	Yes
	chiX	allA	AAGTGACGGCATAATAATAAAAAAATGAAATTCCTCTTTGACGGGCCAATAGCGATATTGGCCATTTTTTTA	GTGCTTATGGCGACGTAATCGAAACGCAGCAACGGGATTTTTTCCA	1	-18.1	No	No	Yes	No
	gadY	aceK	TGTTATAACGGTTTATTAGTCTGGAGACGGCAGACTATCCTCTTCCCGGTCCCCTATGCCGGGTTTTTTTT	TTCGAGATTGCGGAGAGCTTTTTTAACTCCGTGT	1	-16.1	No	No	No	Yes
	arcZ	rcnB	TTTCCCTGGTGTTGGCGCAGTA	AAGTAGTTTCATTGCTGACTTTAAGCATTTCAAACCAGGGGACACC	1	-19.7	Yes	No	Yes	Yes
	arrS	gadX	GTAATCCGATTTAAATATCGAGTCTCCTTGTTTCGACTTAAGCTGGCAATTGGATTGCCAGCTTTCTTTTA	GCGGAAGGAATAAGATTATAGAGTTTTACTCAGACATAAAAAAAACCCGGCATAGGGGACCGGGAAGAGGATAGTCTGCCGTCTCCAGACTAATAAA	5	-27.1	No	No	Yes	Yes
	mgrR	atpE	CAAGCATTCACCGCCGGTTT	TTTATCGTTATGGGTCTGGTGGATGC	2	-18.4	No	No	No	Yes
	ryeA	mtlD	CTTCTGGCTTTTAACAGATAAAAAGAGACCGAACACGATTCCTGTATTCGGTCCAGGGAAATGGCTCTTGGG	ATTGGTGATGATGTCGTTGATCTGATTGCT	1	-12.8	No	No	Yes	No
	micA	yebO	ATGAAAGACGCGCATTTGTTATCATCATCCCTGAATTCAGAGATGAAATTTTGGCCACTCACGAGTGGCCTTTTTCT	ATTGCGTCTTTGGTTGTATCGGTGGTGGTTCTTCTTAT	1	-19.9	No	Yes	No	No
	ryeA	mglB	AAGGAAATGCTTCTGGCTTTTAACAGATAAAAAGAGACCGAACACGATTCCTGTATTCGGT	TTGAAGCGCTGAAAGCACACAACAAGTCCAGCATTCCGGTGTTTGGCGTCGATGCGCTGC	1	-20.8	No	No	No	Yes
	arrS	secY	AATATCGAGTCTCCTTGTTTCGACTTAAGCTGGCAATTGGATTGCCAGCTTTCTTTT	ATTTGCAGCCTGGGCAACCGCTTTATGTGTTACT	1	-14.5	No	Yes	No	No
	chiX	gdhA	TGACGGCATAATAATAAAAAAATGAAATTCCTCTTTGACGGGCCAA	ATTTGGCGGCAGTCTTATTCG	1	-9.9	No	No	Yes	No
	ryeA	mhpB	AAGGAAATGCTTCTGGCTTTTAACAGATAAAAAGAGACCGAACACGATTCCTGTATTCGGTCCAGGGA	TTTGGGATAACCAGTTCATGACTTTGCTGGAGCAGGGACGCATACAG	1	-18.8	No	No	Yes	No
	gcvB	prmB	CTTCCTGAGCCGGAACGAAAAGTTTTATCGGAATGCGTGTTCTGGTGAACTTTTGGCTTACGGTTGTGATGTTGTGTTGTTGTGTTTGCAATTGGTCTGCGATTCAGACCATGGTAGCAAAGCTACCTTTTTTCACTTCCTGTACATTTACCCTGTCTGTCCATAGTGATTAA	ATAAAGATTAAGTAAACACGCAAACACAACAATAACGGAG	34	-31	No	Yes	Yes	Yes
	spf	gsiC	TTTTAGCCGCCCCAGTCAGT	AGCACTACATTTTACCCTCCCT	2	-2.2	No	Yes	No	No
	arrS	ftsA	AATATCGAGTCTCCTTGTTTCGACTTAAGCTGGCAATTGGATTGCCAGCTTTCTT	TCATTGGCGTGGGCAGCTGCCCGTCGCGTGGTATGGA	1	-21.1	No	No	Yes	No
	dsrA	ydgD	CAAGTTTCATCCCGACCCCCT	TTGCTGTAGTGTTGGGTGCAATTAGTTTGACGTCTGCTTTTGTGTTTGCAGATAAACCAGACGTTGCC	1	-10.9	No	No	No	Yes
	arcZ	yobF	AAAACAGTGCTGTGCCCTTGTAACTCATCATAATAAT	ATTTCGGGTTAAACGAGGTACAGTTCTGTTTATGT	8	-27.2	No	Yes	No	No
	spf	ftsK	TTTTAGCCGCCCCAGTCAGTA	TTGTGGTGTTGGTTGACGAATTTGCCGACCTGATGATGACGG	1	-10.2	No	Yes	No	No
	sdsR	ybeD	GCACGGCTCTCTCCCAAGAGCCATTTCCCTGGACCGAATACAGGAATCGTGTTCGGTCTCTT	GCGTTACCTGAGCTGGTTGATCAGGTGGTTGAAGTGGTACAGCGCCATGCGCCAGGTGACTACACCCCAA	1	-35	No	No	No	Yes
	omrB	acs	CCCAGAGGTATTGATAGGTGAAGTC	GCGGAAGAGATGAACGCCGAAGATCCGCTGTTTATTCTCTACACCTCCGGTTCTACCGGT	1	-13.2	No	No	Yes	No
	arrS	folC	AATCCGATTTAAATATCGAGTCTCCTTGTTTCGACTTAAGCTGGCAATTGGATTGCCAG	GCTGGTGTGTGGTTCTTTCCACACGGTCGCACATGTCATGGAAGTGATTGACGCGAGGAGAAGCGGTGGCAAG	1	-34.8	Yes	No	No	Yes
	ryeA	fre	TTCTGGCTTTTAACAGATAAAAAGAGACCGAACACGATTCCTGTATTCGGTCCAGGGAAATGGCTCTTGGGA	TGCCCGCTCGATTTTGCTGACAGCGTTGGCGC	1	-17.5	No	No	Yes	No
	cyaR	fabH	CGCTGAAAAACATAACCCATAAAATGCTAGCTGTACCAGGAACCACCTCCTTAGCCTGTGTAATCT	TTTGGCGGTGGATTCACCTGG	1	-18.7	No	No	Yes	No
	omrB	csiE	CCAGAGGTATTGATAGGTGAAGTCAACTTCGGGTTGAGC	CTGCCAGATCTTGCTGACGCTCTTTCAGCCGGGGTTGACCGCCA	4	-27	No	No	No	Yes
	ryeA	ydgD	ATGCTTCTGGCTTTTAACAGATAAAAAGAGACCGAACACG	AATAATCATAATTACCCACCAGAGTGTGATATGCGTACAACCATTGCTGTAGTGTTGGGTGCAATTA	1	-13.3	No	No	No	Yes
	arrS	bcsE	CCGATTTAAATATCGAGTCTCCTTGTTTCGACTTAAGCTGGCAATTGGATTGCCAGCTTTCTTTT	TGGTCTGGTTTGAAGATGATC	1	-9.4	No	No	Yes	No
	arrS	bhsA	CGATTTAAATATCGAGTCTCCTTGTTTCGACTTAAGCTGGCAATTGGATTGCCAGCTTTCTTTT	TGTCATTTGCCAGCTTTGCGGCTGTCGAAGTTCAGTCAACGCCAGAAGGCCAACAAA	1	-27.6	No	No	Yes	No
	ryeA	sspA	CTTCTGGCTTTTAACAGATAAAAAGAGACCGAACACGATTCCTGTATTCGGTCCAGGGAAATGGCTCTTG	ATTGTGCTGGCTGAGAAAGGTGTAAGTTTCGAGATCGAAC	1	-20.7	No	Yes	No	No
	gcvB	ynfH	AAGTTTTATCGGAATGCGTGTTCTGGTGAACTTTTGGCTTACGGTTGTGATGTTGTGTTGTTGTGTTTGCAA	GGTCTTGGATGCTGGCTTTGCCCGCTCA	1	-10	No	No	No	Yes
	omrB	treB	CCCAGAGGTATTGATAGGTGAAGTCAACTTCGGGTTGAGC	CATCATCCCGATTGTACTCACCTCGTTTATCTATCAGCGGAAATACCGCCTGGGCACGCTGGACATTGTTTAATTTTCTTCGGGGCGCAATTGCGCCCCCTCGC	5	-34.5	No	No	Yes	No
	chiX	fabR	GCATAATAATAAAAAAATGAAATTCCTCTTTGACGGGCCAATAGCGATATTGGCCATTTTTTT	AACAACGTCGGCAATTAGAAGAGCGACT	1	-14.2	No	Yes	No	No
	arrS	glcG	GTAATCCGATTTAAATATCGAGTCTCCTTGTTTCGACTTAAGCTGGCAATTGGATTGCCAGC	CTGGTTTAACCGGAGCACAGGATGCGCAGGTCGCGAAAGCGGCAGCAGCGGTGTTGGC	1	-29.2	No	No	No	Yes
	spf	ygiN	TAGGGTACAGAGGTAAGATGTTCTATCTTTCAGACCTTTTACTTCACG	TTGAGCAGTGGGAAAGCATCGCGCATCTTGAAGCGCATCTGCAAACCCCGCACATGAAGGCGTATAGCG	1	-22.7	No	No	No	Yes
	spf	gadX	GTAGGGTACAGAGGTAAGATGTTCTATCTTTCAGACCTTTTACTTCACGTAATCGGATTTGGCTGAATATTTTAGCCGCCCCAGTCAGT	AGGAATAAGATTATAGAGTTTTACTCAGACATAAAAAAAACCCGGCATAGGGGACCGGGAAGAGGATAGTCTGCCGTCTCCAGACTAATAAACCGTT	5	-29.4	No	Yes	Yes	Yes
	cyaR	rsxC	GCTGTACCAGGAACCACCTCCTTAGCCTGTGTA	ATTTCTCTGCGGGTGATTCCAAC	1	-13	No	No	Yes	No
	gcvB	exuR	CTTCCTGAGCCGGAACGAAAAGT	ATGCTTCCGTGATTCCGAGTGGGATTT	1	-12.9	No	No	No	Yes
	chiX	aceK	AAGTGACGGCATAATAATAAAAAAATGAAATTCCTCTTTGACGGGCCAATAGCGATATTGGCCATTTTTTT	CGTTGGTCTGGTCGTGGAGCAACTGCGCTGCATTACTAACGGCCAAAGTACGGACGCGGCATTTTTACTACGTGTTAAAGAGCA	3	-25.2	No	Yes	Yes	Yes
	chiX	ftsI	TAATAAAAAAATGAAATTCCTCTTTGACGGGCCAATAGCGATATTGGCCATTTTTTT	TTGGGGTTGGTCGGAGAACGCAGTGGCTTATATCCTCAAAAACAACGGTGGTCTGAC	1	-22	No	No	No	Yes
	sdsR	gsk	TAGCGCACGGCTCTCTCCCAAGAGCCATTTC	ACTGGTGATTGAGGATGATGTAGCCGAAGCGCTT	2	-29.7	No	No	No	Yes
	arrS	preA	AAATATCGAGTCTCCTTGTTTCGACTTAAGCTGGCAATTGGATTGCCAGCTTTCTT	TTGATCGCTTCGATCATGGGGGAAAATGAGCA	1	-15.1	No	No	Yes	No
	spf	proQ	TACTTCACGTAATCGGATTTGGCTGAATATTTTAGCCGCCCCAGTCAGT	AATTTCATGGAAAATCAACC	1	-5.9	No	No	Yes	No
	arcZ	cyoB	TTCCCTGGTGTTGGCGCAGTATTCGCGCACCCCGGTCTA	TACCATTCTGAAGATGCGCGCACCGGGC	5	-24.6	No	No	No	Yes
	omrB	arcB	GTATTGATAGGTGAAGT	CGTAGAAGTGCTGAAAGCGTGGGTGGCAAAAGCCACTAAAAAATGACCCCGGCTAGACCGGGGTGCGC	1	-9.9	No	No	No	Yes
	ryeA	hisS	AAATGCTTCTGGCTTTTAACAGATAAAAAGAGACCGAACACGATTCCTGTATTCGGTCCAGGGAAATGGC	ACAGTCTCGGCTCCCAGGGCACCGTGTGTGCAGGC	1	-24.5	No	No	Yes	No
	gcvB	nnr	TTTGCAATTGGTCTGCGATTCAGACCATGGTAGCAAAGCTACCTTTTTTCACTTCCTGTA	AGGTCACGTTGTTGGCCCAGGAGAGCGACAAACCGTTGCCGGAAGAGGCCGCGCTGGCACGCGAAGCATGGT	1	-25	No	Yes	No	No
	gadY	rplN	AACAGGGAGTGTTATAACGGTTTATTAGTCTGGAGACGG	AAAGAAGCAATTCCGCGTGGTAAGGTCAAAAAAGGTGATGTGCTGAAGGC	1	-10	No	No	No	Yes
	chiX	proS	GACGGCATAATAATAAAAAAATGAAATTCCTCTTTGACGGGCCAATAGCGATATTGGCCATTTTTT	CAGATTAAAGGCTGATGCCAGAAAGGGTCCTG	1	-18.4	No	No	No	Yes
	arrS	gshA	AATCCGATTTAAATATCGAGTCTCCTTGTTTCGACTTAAGCTGGCAATTGGATTGCCAGCTTTCTTTTA	TGAACGCCGTCAGCAGGAAATGGAAGCCGCTGATACCGAACCGTTTGCGGTGTGGCTGGAAA	1	-23.9	No	No	No	Yes
	chiX	gadC	AAGTGACGGCATAATAATAAAAAAATGAAATTCCTCTTTGACGGGCCAATAGCGATA	CTTTGGGCGCTGGCATTAACGCAGTTTG	1	-9.5	No	No	No	Yes
	omrA	yqiB	CGGTACGCTCTTCGTACCCTGTCTCTTGCACCAACCTGCGCGGATGCGCAGGTTTTTTT	AGCGGACTGGTTGCGATACTG	1	-15.4	No	No	No	Yes
	spf	yigG	GTAGGGTACAGAGGTAAGATGTTCTATCTTTCAGACCTTTTACTTCAC	TTTCTTATTATCTTTTTTAA	1	-6.3	No	No	Yes	No
	csrB	pyrL	CAGGAAGCAATAGTTCAGGATGAACGATTGGCCGCAAGGCCAGAGGAAAAGTTGTCAAGGATGAG	GTTGATCACCCATTCCCAGCCCCTCAATCGAGGGGCTTTTTT	1	-18.9	No	No	No	Yes
	chiX	ompX	AAGTGACGGCATAATAATAAAAAAATGAAATTCCTCTTTGACGGGCCAATAGCGATATTGGCCATTTTTT	TAGGACTTATTTGAATCACATTTGAGGTGGTTATGAAA	2	-11.5	No	Yes	No	Yes
	arcZ	tnaC	TTCCCTGGTGTTGGCGCAGTATTCGCGCACCCCGGTCT	CCTTGATTTGCCCTTCTGTAGCCATCACCAGAG	23	-24.5	Yes	Yes	Yes	Yes
	gadY	yebO	AGGGAGTGTTATAACGGTTTATTAGTCTGGAGACGGCAGACTATC	AATTCAGGCGTGATGAACATTGCGTCTTTGGTTGTATCGGTGGTGGTTCTTCTTATCGGGCTCATCTTGT	1	-19.6	No	No	No	Yes
	gcvB	edd	TTTACCCTGTCTGTCCATAGTGATTAATGTAGCACCGCCT	GTGTGAATGGACAGACAGGCGAACTGAC	2	-25.3	No	No	Yes	No
	micA	yjbR	AAGACGCGCATTTGTTATCATCATCCCTGAATTCAGAGATGAAATTTTGGCCACTC	TTTGCGATGGTGAAAGAAGTAGAAAATCGCCCAGCTGTTTCGCTGAAAACCAGCCCGGAGCTG	1	-14.6	No	No	Yes	No
	arcZ	prmB	TTCCCTGGTGTTGGCGCAGTATTCGCGCACCCCGGTC	AGCAGCTTATTGCCGCACGAGAACATTTCGCGATTTATAAAGATTAAGTAAACACGCAAAC	1	-16.6	No	Yes	No	No
	arcZ	etk	TTCCCTGGTGTTGGCGCAGT	TTAAACGCGCCAGCACCGCTTACAGTTACGGCTATAACTAT	3	-24.3	No	No	Yes	No
	spf	waaS	TAATCGGATTTGGCTGAATATTTTAGCCGCCCCAGTCAGT	AGTTTATCTGACAAAAATAACAGCCAGCCAATATGTTTTTTCCTTGGTCGTGAT	1	-16.3	No	No	Yes	No
	spf	aceA	CTTTTACTTCACGTAATCGGATTTGGCTGAATATTTTAGCCGCCCCAGTCAGTA	TTGAGCCGGGCGATCCGCGCTATGTCGATTACTTCCTGCCGATCGTTGCCGATGCGGAAGCCGGT	1	-32.8	No	No	No	Yes
	ryeA	dcuA	GCTTCTGGCTTTTAACAGATAAAAAGAGACCGAACACGATTCCTGTATTCGGTCCAGGGAAATGGCTCTTGGGAG	GTTTTGCTGGCGATCTTCTTGGGCGCCAGATTGGGGGGAATAGGTATTGGTTTTGCAGGCGGATT	1	-37.9	No	Yes	No	No
	spf	asd	GACCTTTTACTTCACGTAATCGGATTTGGCTGAATATTTTAGCCGCCCCAGT	ACTATTAAATTGAAAAAAGAT	1	-4	No	No	Yes	No
	arcZ	opgG	TTTCCCTGGTGTTGGCGCAGTATTCGCGCACCCCGGT	TGGTTATGCCAGGGCGTGACACGGTTGTGGATGTGCAGTCGAAAATCTATCTGCGCGATA	1	-25.4	No	No	No	Yes
	arcZ	yaiA	TTTCCCTGGTGTTGGCGCAGTATTCGCGCACCCCGGTC	AACTCAGAGCCGATCATCCTAAACCAGACTCGTTGATCAGTGAACATCCGACCGCTCAGGAAGCGATGGATG	1	-19.6	No	No	No	Yes
	arcZ	yggC	TTTCCCTGGTGTTGGCGCAGTATTCGCGCACCCCGGTCT	TTTTCTTTGCGCTCCGCCGGGGACG	1	-26.9	No	No	No	Yes
	micA	gcvT	GCGCATTTGTTATCATCATCCCTGAATTCAGAGATGAAATTTTGGCCACTCACGAGTGGCCTTTTTCTTTTC	GAAACCATCTCTCCTTTAGCCGC	1	-11.6	No	No	Yes	No
	mgrR	ydhJ	ATCCATGCAAGCATTCACCGCCGGTT	GTAGTTGCGGTTCTTGCCGGATGGTGGCTGTGGAA	16	-22.7	No	No	No	Yes
	ryeA	yidB	AAGGAAATGCTTCTGGCTTTTAACAGATAAAAAGAGACCGAACACGATTCCTGTATTCGGTCCAG	GGTCAACACGTAACGCTTTACAGGTGATTATCATGGGGCTTTTTGATGAAGTTGTCG	1	-18.4	No	No	Yes	No
	gcvB	waaR	CTGAGCCGGAACGAAAAGTTTTATCGGAATGCGTGTTCTGGTGAACTTTTGGCTTACGGTTGTGA	TGATCGACTGCGCTCATTGCCT	1	-12	No	No	Yes	No
	cyaR	nuoC	CTGAAAAACATAACCCATAAAATGCTAGCTGTACCAGGAACC	CTGGCACAGCTACATTC	1	-19.4	No	No	Yes	No
	arrS	fdhD	AATATCGAGTCTCCTTGTTTCGACTTAAGCTGGCAATTGGATTGCCAGCTTTCTT	ATATCTTCGGCATGGATGTCGTTCCTTCC	1	-10.4	No	No	Yes	No
	arrS	kefB	ATTTAAATATCGAGTCTCCTTGTTTCGACTTAAGCTGGCAATTGGATTGCCAGCTTTCTTT	GATCTTTTACGTTCTGCGGGTGCAG	1	-8	No	No	Yes	No
	gcvB	wzzB	ATTTACCCTGTCTGTCCATAGTGATTAATGTAGCACCGCCTAATTGCGGTGCTTTTTTT	TTAGGGTAATGATGAGAGTAGAAAATAATAATGTTTCT	1	-10.4	No	No	Yes	No
	ryeA	gdhA	AAAAGCGTGGTGGTCATCAGCTGAAATGTTAAAAACCGCCCGTTCTG	CACAATCGTATTAATATATAAGGGTTTTATATCTATGGATCAGACATATTCTCTGGAGTC	1	-11.9	No	No	No	Yes
	ryeA	rpoE	AAGTCAGCGAAGGAAATGCTTCTGGCTTTTAACAGATAAAAAGAGACCGAACACGA	GTGGCGTTTCGATAGCGCGTGGAAATTTGGTTTGGGGAGACTTTACCTCGGATGAGCGAGCA	1	-19.9	No	No	No	Yes
	gcvB	rpoC	CCTGTACATTTACCCTGTCTGTCCATAGTGATTAATGTAGCACCGCCTAATTGCGGTGCTTTTTTTT	TCTTTGGGCCGGTAAAAGAT	1	-11.3	No	No	No	Yes
	dsrA	pfo	ATTTTTTAAGTGCTTCTTGCT	TTACGATCTGGCACTCAGCC	1	-8.1	No	No	No	Yes
	sroH	evgS	AAAATAAGAACACATGTTCTCATCTTCCAGGAT	ATGTTTTTTCTAATGCG	1	-4	No	No	No	Yes
	arrS	guaA	GTAATCCGATTTAAATATCGAGTCTCCTTGTTTCGACTTAAGCTGGCAATTGGATTGCCAGCTTTCTT	TTTCACTTGCCTCGGAATAAGCGTCAATGA	1	-18.3	No	No	Yes	No
	arcZ	dnaK	TTCCCTGGTGTTGGCGCAGTATTCGCGCACCCCGGTCT	TATCGAGTCTGCGCTGACTGCACTGGAAACTGCTCTGAAAGG	1	-26.3	Yes	No	No	Yes
	cyaR	infC	CTGAAAAACATAACCCATAAAATGCTAGCTGTACCAGGAACCA	AAGGAAATTAAATTCCGTCCTGGTACAGATGAAGG	9	-20.6	No	Yes	Yes	Yes
	ryeA	yiaJ	AAGTCAGCGAAGGAAATGCTTCTGGCTTTTAACAGATAAAAAGAGACCGAACACGATTCCTGTAT	GAAAAAAAGAGAACGAG	1	-3.5	No	No	No	Yes
	arcZ	nuoC	TTCCCTGGTGTTGGCGCAGTATTCGCGCACCCCGGTCT	CTTACGTCATGCTGTTTGACTTACACGGCATGGACGAACGTCTGCGCACACACCGCGAAGG	2	-30.6	No	Yes	No	No
	chiX	lpp	AAAGTGACGGCATAATAATAAAAAAATGAAATTCCTCTTTGACGGGCCAATAGCGATATTGGCCATTTTT	AACTGGTACTGGGCGCGGTAATCCT	1	-11.8	No	No	No	Yes
	cyaR	kdgR	CTGAAAAACATAACCCATAAAATGCTAGCT	TAAAACACTCGCAATGAGGTGATAAATGGCTAACGCAGATCTGGATAAACAGCCTGATTC	1	-10.2	No	No	Yes	No
	cyaR	rfbA	CTGAAAAACATAACCCATAAAATGCTAGCTGTACCAGGAACCACCTCCTTAGCCTGTGTAATCTCCCTTACACGGGCTTATTTTTTA	TAAAGGTATTATTTTAGCGGGTGGTTCTGGTACACGTCT	48	-31.9	Yes	Yes	Yes	Yes
	arrS	gadC	TTAAATATCGAGTCTCCTTGTTTCGACTTAAGCTGGCAATTGGATTGCCAGCTTTCTTTTA	ATGTTGAATTACTGGTTGTTAGTTTCCTGGTGGTACTTGCCCTGCCCTTTATT	1	-20.6	No	No	No	Yes
	ryeA	ompL	AAAAAGAGACCGAACACGATTCCTGTATTCGGTCCAGGGAAATGGCTCTTGGGAGAGAGCCGTGCGCTAAAA	TTTAATCTGACAGTACGAAATCGCTATAACCATAATAACTATAGTTCAACAGATTTGAGCGGG	1	-18.7	No	No	Yes	No
	spf	ffh	ATCGGATTTGGCTGAATATTTTAGCCGCCCCAGTCAGT	CAAAGGTTCGCGTAAACGCCGTATTGCTGCCGGTTGCGGTATGCAGGTGCAGGACGTTAACCG	1	-19.1	No	No	No	Yes
	gadY	slyB	TTATTAGTCTGGAGACGGCAGACTATCCTCTTCCCGGTC	GGTGATGATTCCAACGTTATCGGTGCAATTGGCGGTGCTGTTCTTGGTGGTTTCCTGG	1	-18.8	No	No	Yes	No
	arcZ	ytfR	TTTCCCTGGTGTTGGCGCAGTATTCGCGCACCCCGGTCTAGCCGGGGTCATTTTT	GGGAGCACGCTTTACACCGGGGGAAACCATGACGACCGACCAACACCAGGAGATCCT	179	-45	No	Yes	Yes	Yes
	spf	rmf	GTAGGGTACAGAGGTAAGATGTTCTATCTTTCAGACCTTTTACTTCAC	GACAGGGTAGTAATGGCCTGATTCTGTCTCTTTAAAAAGAAACCTCCGCATTGCGGAGGTTTCGC	2	-18.8	No	Yes	Yes	No
	gcvB	rpoZ	GTGAACTTTTGGCTTACGGTTGTGATGTTGTGTTGTTGTGTTTGCAATTGGTCTGCGATTCAGACCATGG	TTGACCTGGTACTGGTCGCCGCGCGTCGCG	1	-24.5	No	No	Yes	No
	spf	ribF	CGTAATCGGATTTGGCTGAATATTTTAGCCGCCCCAGTCAGT	AGAGTGTGGCGTTGATTACGTGCTGTGCGTGCGTTTCG	1	-19.2	No	Yes	No	No
	arrS	slyB	GTAATCCGATTTAAATATCGAGTCTCCTTGTTTCGACTTAAGCTGGCAATTGGATTGCCAGCTTT	TTCAGGGCGGTGATGATTCCAACGTTATCGGTGCAATTGGCGGTGCTGTTCTTGGTGGTTTCCTGGGGAA	1	-27.4	No	No	Yes	No
	glmZ	ampG	GTAGATGCTCATTCCATCTCTTATGTTCGCCTTAGTGCCTCATA	ATTCCTCTGGTCACCGCTGATGGACCGCTACACGCCTCCATTTTTTGGGCGGCGGCGCGGTTGG	1	-17.3	No	No	Yes	No
	chiX	yraP	AAGTGACGGCATAATAATAAAAAAATGAAATTCCTCTTTGACGGGCCAATAGC	TGCTATGGGCGTAGACGGTGCCAACGAA	1	-15.9	No	Yes	No	No
	ryhB	ygiQ	CATTGCTCACATTGCTTCCAGTATTACTTAGCCAGC	CCTTTGATTATTTTTTTATCATTTCTGGAAGCAAAATGAGCTCTA	9	-24.6	No	No	No	Yes
	gcvB	lldD	TTCTGGTGAACTTTTGGCTTACGGTTGTGATGTTGTGTTGTTG	TTGATGTCGTGCGTATGATTGCGCTCGGT	1	-9.6	No	No	Yes	No
	gcvB	secD	TGTTGTGTTGTTGTGTTTGCAATTGGT	AACGTTACAAGAAGAAAAAATAACTGCTAAGTCTGT	1	-6.6	No	No	Yes	No
	arrS	kch	CGATTTAAATATCGAGTCTCCTTGTTTCGACTTAAGCTGGCAATTGGATTGCCAGCTTTCTTTTA	AAAGAATCGGCGCAAAAATAGAGTT	1	-8.3	No	No	Yes	No
	chiX	yebF	AGTGACGGCATAATAATAAAAAAATGAAATTCCTCTTTGACGGGCCAATAGCGATATTGGCCATTTTTTT	AAAACGTGATTATCAACAAAATCGCGTGGCGCGTTGGGCAGATGATCAAAAAATTGTCGGTCAGGCCGATCCCGTGGCTTGGGTCAGTTTGCAGGACATTCAGGGTAAAGATG	2	-31.2	No	Yes	No	Yes
	gcvB	clpB	GAGCCGGAACGAAAAGTTTTATCGGAATGCGTGTTCTGGTGAACTTTTGGCTTACGGTTGTGAT	CATTTAATCTCCAGTAGCAACTTTGATCCGTTATGGGAGGAGTTATGCGTCTGGATCGTCT	1	-23.7	No	No	No	Yes
	cyaR	pykF	CTGAAAAACATAACCCATAAAATGCTAGCTGTACCAGGAACCACCTCCTTAGCCTG	GGTTTCTGGTGCACTGGTACCGAGCGGCACTACTAA	3	-29.8	No	No	Yes	No
	gcvB	yehW	CTTCCTGAGCCGGAACGAAAAGT	AATTGCTGTCACTCGCCCGTGGGGCGCGGAATTTCGCCCACTGGTGGAAACTATTGCCGCCGTTGGACAGA	1	-12.8	No	Yes	No	No
	arcZ	panD	TTCCCTGGTGTTGGCGCAGTATTCGCGCACCCCGGTCTA	TTCGCACGATGCTGCAGGGCAAACTCCACCGCGTGAAAGTGACTCATGCGGACCTGCACTATGAAGGTTCTTGCGCCATTGACCAGGATTT	17	-32.8	Yes	Yes	Yes	Yes
	arcZ	tamB	TTTCCCTGGTGTTGGCGCAGTATTCGCGCACCCCGGTCTA	AATTTAGCGCTCGACACCCAGGGAGT	6	-28.7	No	Yes	No	Yes
	gcvB	rpsD	CTTCCTGAGCCGGAACGAAAAGTTT	TTGTTAACATCGCTTCTTATCA	1	-6	No	Yes	No	No
	cyaR	rbsC	GCTGAAAAACATAACCCATAAAATGCTAGCTGTACCAGGAACCACCTCCTTAGCCTGTGTAATCTCCCTTACACGGGCTT	CTATTGCTGCGGTGGTTCTGGGCGGTACGAGTCTGGCGGGCGGAAAAGG	8	-33.4	Yes	Yes	No	No
	arcZ	bluR	TTCCCTGGTGTTGGCGCAGT	TTTACAACACTGGGGTGAGC	2	-18.2	No	No	Yes	No
	spf	yoaD	TTTTAGCCGCCCCAGTCAGTA	CCCAGCCATTTTCGCCG	1	-1.5	No	No	No	Yes
	sroH	aceK	GCGTTCTGAATACCAGAGATAATTCTCTGGCGAAACCCACCTTAAGGTGGGTTTTGTTATTTT	ACGGCCAAAGTACGGACGCGGCATTTTTACTACGTGTTAAAGAGCATTACACCCGGCTGTTGC	1	-19.5	No	No	No	Yes
	cyaR	ybaL	AGCTGTACCAGGAACCA	CAGGCCGGACAAAACCTGGTACTGGCA	1	-18.1	Yes	Yes	No	No
	omrB	yohP	CCCAGAGGTATTGATAGGTGAAGTCAA	ACGCCAATGAAAATTATACTCTGGGCTGTATTGATTATTTTCCTGATTGGGCTACTGGTGGTGACTG	1	-17.6	No	No	No	Yes
	omrB	yjgN	TCCCAGAGGTATTGATAGGTGAAGT	TCTTTTTTTTGTTTTTTTCTATTT	2	-5.2	No	No	No	Yes
	gadY	preT	CTGAGAGCACAAAGTTTCCCGTGCCAACAGGGAGTGTTATAACG	TTATGTCACGACGCTCCCTGTAGTCAGGCT	1	-23.9	No	No	Yes	No
	arrS	kgtP	GTAATCCGATTTAAATATCGAGTCTCCTTGTTTCGACTTAAGCTGGCAATTGGATTGCCAGCTTTCTTTT	CCGTGGTGGCGTTTCTGGTTTCTTTGATGCTACATCG	1	-15.9	Yes	No	No	Yes
	gcvB	tnaB	AAAGTTTTATCGGAATGCGTGTTCTGGTGAACTTTTGGCTTACGGTTGTGATGTTGTGTTGTTGTGTTTGCAA	TCTTCCCGAACGGCTTTATTTACGGGATCGGCGGTGCCGGGCTGTGCGCCACCA	1	-27	No	No	Yes	No
	mgrR	ygdQ	TATCCATGCAAGCATTCACCGCCGGTT	TTTTTGGCAGGGCTTTTTAGATGTTATTTGCATGGATA	1	-23.4	Yes	No	Yes	No
	ryeA	marB	TTTTAACAGATAAAAAGAGACCGAACACGATTCCTGTATTCGGTCCAGGGAAATGGCTCTTG	ATGTCGTGGTTGTTCCCCCATCGCAGGAACACCCACCGTTTGATTTAAATCACATGGGTACT	1	-21.1	No	No	Yes	No
	dsrA	sdhC	AAGCAAGTTTCATCCCGACCC	CATCGCGTTTCCGGTGTGATCACC	2	-8.1	No	No	No	Yes
	sdsR	mepS	AAGCCTGCATTAATGCCAACTTTTAGCGCACGGCTCTCTCCCAAGAGCCATTTCC	AGGACTTCAAGGGAAAACAAACAACATGGTCAAATCTCAACCGATTTTGAGATAT	1	-9.9	No	No	No	Yes
	gcvB	ybaY	CGGTTGTGATGTTGTGTTGTTGTGTTTGCAATTGGTCT	TCTATTTCAGCAACACAACAACCAGCTATCCAG	7	-25.5	No	No	Yes	Yes
	chiX	dadA	AAAGTGACGGCATAATAATAAAAAAATGAAATTCCTCTTTGACGGGCCAATAGCGATATTGGCCATTTTTTT	TTATTATTCTTTTACTGTATCTACCGTTATCGGAGTGGCTATGCGAGT	1	-19.5	No	No	Yes	No
	sroH	rsgA	TATCGCAAGGTCAAGGCAAAGTCCGGTAATGG	ATCGACCGTTACCTGGTGGCCTGCGAAACCTTGCAGATT	1	-30.2	No	Yes	No	No
	cyaR	rmf	ACCTCCTTAGCCTGTGTAATCTCC	GCTGAATCAAAGGTCACAATGGCTGGGAGGCTGGCGAGAAGCCATGGCGGACAGGGTAGTAATGGCCTGATTCTGTCTCTTTAAAAAGAAACCTCCGCATTGCGGAGGTTTCGC	5	-23.2	No	No	Yes	No
	chiX	apbE	TAATAATAAAAAAATGAAATTCCTCTTTGACGGGCCAATAGCGATATTGGCCATTTTTTTA	TTACCCGCGTGGCACTGC	1	-13.1	No	No	No	Yes
	dsrA	dsbB	CTTAAGCAAGTTTCATCCCGACCCCC	TTCGTTTCCCGGAATGGCTGCCGCTGGATAAGTGGGTGCCGCAAGTGTTTGTCGCCTCTGGCGA	1	-11.3	No	No	Yes	No
	cyaR	ilvE	CTAGCTGTACCAGGAACCACCTCCTTAGCCTGTGTAATCTCCCTTACACGGGCTTATT	ATTTGGTTCAATGGGGAGATGGTTCGCTGGGA	25	-28	No	No	Yes	No
	arcZ	valS	TTTCCCTGGTGTTGGCGCA	ACTGACCACGCCGGGATC	2	-16.4	Yes	No	Yes	No
	gcvB	dksA	CTTCCTGAGCCGGAACGAAAAGT	ACCGTGCAGCCCAGGAAGAAGAGTTCAGCCTCGAACTGCGTAACCGCGATCGCGAGCGTAAGCTGATCAAA	1	-16.8	No	No	Yes	No
	gcvB	raiA	CTTCCTGAGCCGGAACGAAAAGTTTTATC	ACCAAGACGGGAAGACAAGAGGTAAAATTTATGACAATGAACA	1	-11.3	Yes	No	Yes	No
	micA	aceK	TTCAGAGATGAAATTTTGGCCACTCACGAGTGGCCTTTTTCTTTTC	CGAGATTGCGGAGAGCTTTTTTAACTCCGTGTACTGTCGGTTATTTGACCAC	1	-16.1	Yes	Yes	No	No
	gcvB	ycdT	TTGGCTTACGGTTGTGATGTTGTGTTGTTGTGTTTGCAATTGGT	TTGTTTTTTGTTTTTGG	1	-1.7	No	No	Yes	No
	glmZ	entE	GACCTGTTTTAACGCCTGCTCCGT	TTTTACTGTTCCGGCGA	1	-7.5	No	No	Yes	No
	gcvB	rplQ	GAGCCGGAACGAAAAGTTTTATCGGAATGCGTGTTCTGGTGAACTTTTGGCTTACGGTTGTGATGTTGTGTTGT	TATTCTGAAGTGTGGCTTCCGTGCAGGCGACAACGCGCCGATGGCTTACATCGAGCTGGTT	1	-37.3	No	Yes	No	No
	mgrR	insA_6	ATCTATCCATGCAAGCATTCACCGCCGGTTTACTGGCGGTTTTTTTT	TTTAGTGTATGATGGTGATTTTAAGGTGCTTGCGTGGCTTCCAT	7	-30.4	No	Yes	No	No
	chiX	dppA	AGTGACGGCATAATAATAAAAAAATGAAATTCCTCTTTGACGGGCCAATAGCGATATTGGCCATTTTTT	AAAACAAAAAAGGTCAGGCAGCGACAACCCACTGCAAAGGGTTAAAACAACAAACATCACAATTGGAGCAGAATA	2	-23.1	No	Yes	No	Yes
	chiX	aceK	AAGTGACGGCATAATAATAAAAAAATGAAATTCCTCTTTGACGGGCCAATAGCGATATTGGCCATTTTTTTA	GAGATTGCGGAGAGCTTTTTTAACTCCGTGTACTGTCGGTTATTTGACCACCGCTCGCTTACTCCCGAGCGGCTTTTTATC	3	-23.2	No	No	No	Yes
	chiX	yrfF	AAAAAATGAAATTCCTCTTTGACGGGCCAATAGCGATATTGGCCATTTTTTTA	AAAGTGCGATCCAGACGGCGTCAGCTGCCCTGGA	1	-15.2	No	No	Yes	No
	arrS	ycfJ	GTAATCCGATTTAAATATCGAGTCTCCTTGTTTCGACTTAAGCTGGCAATTGGATTGCCAGCTTTCTT	TTGAATAACAAAGTATAACAAGGCT	1	-10.4	No	No	Yes	No
	arrS	malM	GTAATCCGATTTAAATATCGAGTCTCCTTGTTTCGACTTAAGCTGGCAATTGGATTGCCAGCTTTCTTTTA	TTTATCAGCAGTGTAAAAGGCAAGGGGTAATTACGCCCCACAGTGCTGATTTTGCAACAACTGGTGCGTCTCCTGGCGCACCTTTTTTT	3	-25.2	No	Yes	Yes	Yes
	ryeA	rpsJ	AAGTCAGCGAAGGAAATGCTTCTGGCTTTTAACAGATAAAAAGAGACCGAACACGATTC	ATCGTCTGATCGATCAAGCAACCGCGGAAATCGTCGAGACTGCCAAGCGCACTGGTGCGCAGGTCCGTGGTCCG	1	-18.8	No	No	Yes	No
	ryeA	yciK	CTTCTGGCTTTTAACAGATAAAAAGAGACCGAACACGATTCCTGTATTCGGTCCAGGGAAATGGC	ACTGGCAGCGCGACAGACAACGTCGTTGAGGAGTAGCC	1	-18.4	No	No	No	Yes
	ryeA	flhB	CTTCTGGCTTTTAACAGATAAAAAGAGACCGAACACGATTCCTGTATTCGGTCCAGGGAAATG	GCCCGTCGATTGTCGGGCATGCTCTC	1	-12.8	No	No	No	Yes
	csrB	mreB	CATCGGGGTGGTGTGAGCAGGAAGCAATAGTTCAGGATGAACGATTGGCCGCAAGGCCAGAGGA	ACTTGTCCATTGACCTGGGTACTGCGAATACCCTCATTTATGTAAAAGGACAAGGCATCGT	1	-26.9	No	Yes	No	No
	arrS	pyrL	CGATTTAAATATCGAGTCTCCTTGTTTCGACTTAAGCTGGCAATTGGATTGCCAGCTTTCTT	CAATTTGCCGGGAGGATGTATGGTTCAGTGTGTTCGACATTTTGTCTTACCGCGTCTGAAAAA	1	-21.9	No	No	No	Yes
	omrB	rmf	CCAGAGGTATTGATAGGTGAAGT	GGCCTGATTCTGTCTCTTTAAAAAGAAACCTCCGCATTGCGGAGGTTTC	1	-10.6	No	Yes	No	No
	omrB	yghJ	TCCCAGAGGTATTGATAGGTGAAGTC	AAGAAATCGCTTTTAGCGGCTATTTTGAGCGCAACCCTGTTAGCCGGTTGTGATGGCGGTGGTTC	1	-11.7	No	Yes	No	No
	cyaR	yegI	TAAAATGCTAGCTGTACCAGGAACCACCTCCTTAGCCTGTGTAATCT	TATTTTGGTTCCTGTGCTGGCGGCTAT	1	-24.1	No	Yes	No	No
	arcZ	dksA	TTCCCTGGTGTTGGCGCAGTATTCGCGCACCCCGGTCTA	AAGAAGGGCAAAACCGTAAAACATCGTCCCTGAGTATTCTCGCCATCGCTGGG	4	-27.8	No	No	No	Yes
	chiX	ybjD	ATAATAATAAAAAAATGAAATTCCTCTTTGACGGGCCAATAGCGATATTGGCCATTTTTTT	AATTTGCCCGCCGAATGGGGATTGAATGGCATGTACTGGTCGATGGCGATGAAGC	1	-22	No	No	Yes	No
	cyaR	brnQ	CTGAAAAACATAACCCATAAAATGCTAGCTGTACCAGGAACCACCTCCTTAG	GTGGTGATGGTGGTTCTGGCCA	3	-21	No	Yes	No	No
	omrA	panC	GATTATTCGGTACGCTCTTCGTACCCTGTCTCTTGCACCAACCTGCGCGGATGCGCAGGTTTTTTTTC	AACCCGATGCAGTTCGACCGCCCGGAAGA	1	-15.5	No	No	Yes	No
	arcZ	tynA	TTCCCTGGTGTTGGCGCAGTATTCGCGCACCCCGGTCTA	ATGGAACTTCTTTGACGAAACGCCAACGCTAGGGGCGCT	3	-30.4	No	No	Yes	Yes
	chiX	gadX	AAAGTGACGGCATAATAATAAAAAAATGAAATTCCTCTTTGACGGGCCAATAGCGATATTGGCCATTTTTTTA	TAAGATTATAGAGTTTTACTCAGACATAAAAAAAACCCGGCATAGGGGACCGGGAAGAGGATAGTCTGCCGTCTCCAGACTAATAA	17	-35.1	No	Yes	Yes	Yes
	chiX	pphA	AAGTGACGGCATAATAATAAAAAAATGAAATTCCTCTTTGACGGGCCAATAGCGATATTGGCCATTTTTTTA	CACGGTTGTCTTGAGCAGTTGCGCCGCAAATTATGGCATTGTCGTTTTGATCCGT	1	-24.3	No	No	No	Yes
	gcvB	ygiW	ACTTCCTGAGCCGGAACGAAAAGT	ACCTGGGTAACCCTGCGCGG	1	-7.5	No	No	No	Yes
	rdlB	aceK	TCTGGTTTCAAGATTAGCCCCCGTTCTGTTGTCAGGTTTTACCTCTCAACGTGCGGGGGTTTTCTC	ACGTTGGTCTGGTCGTGGAGCAACTGCGCTGCATTACTAACGGCCAAAGTACGGACGCGGCA	1	-27.5	No	No	No	Yes
	sroH	tnaA	AGAAATTCAGACATCCCGCAACCTGCGATTATCGCAAGGTCAAGGCAAAGTCCGGTAATGGCGTTCTGAATAC	TGGCGGCCTGGAAGGCGGCGCGATGGAGCGTCTGGCGGTAGGTCTGTATGACGGCATGAATC	1	-37.5	No	No	Yes	No
	gcvB	curA	CCCTGTCTGTCCATAGTGATTAATGTAGCACCGCCT	GTTGGTGGTAGCTGCGGCGACAGGACCAGTGGGGGCGACGGTGGGGCAA	33	-34.3	No	No	No	Yes
	spf	malM	GGGTACAGAGGTAAGATGTTCTATCTTTCAGACCTTTTACTTCACGTAATCGGATTTGGCTGAATATTTTAGCCGCCCCAGTCAGT	TCCACCTTTATCAGCAGTGTAAAAGGCAAGGGGTAATTACGCCCCACAGTGCTGATTTTGCAACAACTGGTGCGTCTCCTGGCGCACCTTTTTT	4	-28	No	No	Yes	Yes
	arrS	clpA	AATCCGATTTAAATATCGAGTCTCCTTGTTTCGACTTAAGCTGGCAATTGGATTGCCAGCTTTCTTTTA	AAAGAGAAAAATGAGCTGACTTACGGATTCCAGAGTGCACAAAAGCA	1	-21.4	No	No	No	Yes
	arrS	kgtP	GTAATCCGATTTAAATATCGAGTCTCCTTGTTTCGACTTAAGCTGGCAATTGGATTGCCAGCTTTCTT	CAGGTAATCTGGTCGAGTGGTTCGATTTCTATGTCTACTCGTTCTGTTCACTCTACTTTGCCCACATCTTCTTCCCTTCCGGGAACACG	2	-23.9	Yes	Yes	No	Yes
	chiX	rssA	AAGTGACGGCATAATAATAAAAAAATGAAATTCCTCTTTGACGGGCCAATAGCGATATTGGCC	TCGTTGCAGGATGTTCAATTGGTTCGCTGGTGGGCG	1	-19.7	No	No	No	Yes
	arrS	yehU	GTAATCCGATTTAAATATCGAGTCTCCTTGTTTCGACTTAAGCTGGCAATTGGATTGCCAGCTTTCT	ATTACCGCCGGTGCCGTCACGTTCGT	1	-13.8	No	No	Yes	No
	arrS	rlmE	GTAATCCGATTTAAATATCGAGTCTCCTTGTTTCGACTTAAGCTGGCAATTGGATTGCCAGCTTTCTTTTA	TACGTTCCCGTGCCTGGTTTAA	1	-13.9	No	No	No	Yes
	rybB	fadL	CTTAATTAGTGCCACTGCTTTTCTTTGATGTCCCCATTTTGTGGAGCCCATCAACCCC	AAGTCTGCTCTCGCAGTCGCAGTGGCACTTA	4	-29.2	Yes	No	No	Yes
	ryeA	mqsA	GATAAAAAGAGACCGAACACGATTCCTGTATTCGGTCCAGGGAAATGGCTCTTGGGAGAGAGCCGTGCGCTAAA	ATTCATGACGTACTGATCGTCTCGTTTAAGGAGAAGTAATATGAAATGTCCGGTTTGCC	1	-26.1	No	No	Yes	No
	chiX	galU	TAATAATAAAAAAATGAAATTCCTCTTTGACGGGCCAATAGCGATATTGGCCATTTTTTTA	CTTAGCGCGGATATTTGGCCGTTGCTGGCAAAAACCCCTCCGGGAGCTGGTGATGAAATTCAG	1	-27.2	No	No	No	Yes
	rybB	ygcE	AATTAGTGCCACTGCTTTTCTTTGATGTCCCCATTTTGTGGAGCCCATCAACCCCGCC	CTGGAAAGCGTGGCGCTGACGC	3	-25.2	No	Yes	No	No
	gcvB	serA	ACTTCCTGTACATTTACCCTGTCTGTCCATAGTGATTAATGTAGCACCGCCTAATT	TTTGATATGTTGAAAGGCGGATGCAAATCCGCACACAACATTTCAAAAGACAGGATTGGGTAAATGGCAAAG	30	-37.4	Yes	Yes	Yes	Yes
	arrS	ribB	AATATCGAGTCTCCTTGTTTCGACTTAAGCTGGCAATTGGATTGCCAGCTTTCTTTTA	CAGACGCTACTTTCCTCTTTTGGTACGCCTTTCGAA	1	-13.6	No	No	No	Yes
	gadY	glyS	GACGGCAGACTATCCTCTTCCCGGTCCCCTATGCCGGGTTTTTTTT	TGCGCGTTGCGGATATTTCGCTGTTGCAATAATAACGCCGTTATTAAATAGCCTGCCATCTGGCAGGCTTTTTTT	1	-19.9	No	No	No	Yes
	arrS	yibB	AATATCGAGTCTCCTTGTTTCGACTTAAGCTGGCAATTGGATTGCCAGCTTTCTT	ATTGGTAGAGGGGATTGGACT	1	-17.2	No	No	Yes	No
	cyaR	gadB	CTGAAAAACATAACCCATAAAATGCTAGCTGTACCAGGAACCACCTCCTTAGCCTGTGTAATCTCCCTTACACGGGCTTATTTTT	CCAGCGGTGGCTTCCTGGC	2	-21.8	No	No	Yes	No
	chiX	tktB	GACGGCATAATAATAAAAAAATGAAATTCCTCTTTGACGGGCCAATAGCGATATTGGCCATTTT	AAACGTTTTGAAGCCTATCACTGGCATGTGATCCATGAAATCGACGGTCACGATCCGCAGGCGGTGAA	1	-16.1	No	Yes	No	No
	omrB	mrdA	CAGAGGTATTGATAGGTGAAGTCA	ATACGGCAGAGTCCGCGCTGTTTGTGCGCCGGGCGCTGGTCGCCTTTTTGGGGATTTTGCTGCTGACCGGC	1	-13.4	No	No	No	Yes
	spf	thrS	ATGTTCTATCTTTCAGACCTTTTACTTCACGTAATCGGATTTGGCTGAA	CAATTGGAGGAATAAGGTATTAAAGGCGG	1	-12.9	No	No	Yes	No
	spf	ftsZ	CAAAAAAGAGTAAAGTTAGTCGCGTAGGGTACAGAGGTAAGATGTTCTATCTTTCAGACCTTTTA	AAGGTGCAGACATGGTCTTTATTGCTGCGGGTATGGGTGGTGGTACCGGTACAGG	1	-19.3	No	No	Yes	No
	spf	trmI	TTTCAGACCTTTTACTTCAC	CATGGTGCAGCTCTTTTTCCCTGACCCGTGGCACAAAG	1	-4.2	No	Yes	No	No
	spf	gadC	TTTCAGACCTTTTACTTCAC	TGGTTTATTCCCGTGGGACTTTGTGCT	1	-4.8	No	Yes	No	No
	spf	epd	TTTCAGACCTTTTACTTCACG	CGGGCGTAATGTGGTTCGTGCTTTGTATGAATCCGGACGCCGGGC	1	-7	No	Yes	No	No
	arrS	yceF	GTAATCCGATTTAAATATCGAGTCTCCTTGTTTCGACTTAAGCTGGCAATTGGATTGCCAGCTTTCTTT	CTGGACTGGCGTTGTTTAATTCGGC	1	-17.1	No	No	No	Yes
	arcZ	rcsD	TTTCCCTGGTGTTGGCGCAGTA	CCATGGCGGAACAGCATCAGGGGATTA	4	-24.9	No	Yes	No	No
	arcZ	wecA	TTTCCCTGGTGTTGGCGCAGT	CGCAAACGTCACCAGGGATTGATACC	1	-20.4	Yes	Yes	No	No
	omrB	yjdC	CCCAGAGGTATTGATAGGTGAAGTCAAC	AGCGTGCAACGTGAAGATGTACTGGGAGAAGCCCTGAAATTATT	1	-12.6	No	No	Yes	No
	spf	dcrB	CGTAATCGGATTTGGCTGAATA	ATACGCTGGTTATTCAGTAAGTTTTAAGATGATGAGGCGGCCTCAGGGACGTGTTCCG	1	-11.7	No	No	Yes	No
	cyaR	rplO	CTGAAAAACATAACCCATAAAATGCTAGCTGTACC	GCAGCGATTACAGCCGAAATTCGTCTGTCTGACCTGGCTAAAGTAGAAGGCGGTGTAG	1	-11.6	No	Yes	No	No
	arrS	dnaA	AATCCGATTTAAATATCGAGTCTCCTTGTTTCGACTTAAGCTGGCAATTGGATTGCCAGCTTTCTT	CACCTCGGATCGCTATC	1	-8	No	No	Yes	No
	ssrS	malM	TTCTCTGAGATGTTCGCAAGCGGGCCAGTCCC	CCGTTCCACCTTTATCAGCAGTGTAAAAGGCA	1	-9.8	No	Yes	No	No
	ssrS	ydcU	CAGCCTGCGGCGGCATCTCGGAGATTCCCTTC	TCGCTATGTGGTGCTGCCGCTG	3	-24.5	No	No	Yes	No
	chiX	dadX	TAATAAAAAAATGAAATTCCTCTTTGACGGGCCAATAGCGATATTGGCCATTTTTTTA	CGTGAGCGCGGCTGGAAAGGACCGATCCTGATGCTGGAAGGATTTTTCCATGCTCA	1	-17.3	No	No	Yes	No
	cyaR	gadX	CTTACACGGGCTTATTTTTT	CTGCGGAAGGAATAAGATTATAGAGTTTTACTCAGACATAAAAAAAACCCGGCATAGGGGACCG	1	-9.2	No	No	Yes	No
	dsrA	yjeJ	AGATTTCCTGGTGTAACG	TCACTGTTAGATTTCCT	2	-4.9	No	No	Yes	No
	arrS	nemA	TAATCCGATTTAAATATCGAGTCTCCTTGTTTCGACTTAAGCTGGCAATTGGATTGCCAGCTTTCT	GGTGGCGGCGCGGAAGGCTATACCGATTACCCGACGTTGTAATCCAACATTGCGAGCGGCGTAAAGCCGCCGCTA	2	-29.1	No	No	Yes	Yes
	arrS	rbsK	TAATCCGATTTAAATATCGAGTCTCCTTGTTTCGACTTAAGCTGGCAATTGGATTGCCAGCTTTCTTTT	TTGCGCTTAACCCGGCTCCGGCTCGCGAACTTCCTGACGAACTGCTGGCGCTGGTGGACATTA	1	-24.5	No	Yes	No	No
	arrS	malE	GTAATCCGATTTAAATATCGAGTCTCCTTGTTTCGACTTAAGCTGGCAATTGGATTGCCAGCTTTCTTTTA	CTGGTTGACCTGATTAAAAACAAACACATGAATGCAGACACCGATTACTCCATCGCAGAA	1	-17.8	No	No	Yes	No
	arrS	yncL	GTAATCCGATTTAAATATCGAGTCTCCTTGTTTCGACTTAAGCTGGCAATTGGATTGCCAGCTTTCTTTTA	TTGCTGCTGTTGGTTTGTTTACTCTTATCTCTATGAG	1	-15.1	No	No	No	Yes
	omrB	rarA	CCCAGAGGTATTGATAGGTGAAGTCAACTTCGGGTTGAGCACATG	TCTATGATCCTCTGGGGGCCG	6	-20.1	No	No	Yes	Yes
	gcvB	fdoG	ACTTCCTGAGCCGGAACGAAAAGT	TGTCGAAACAAGGAGCAATCCATGCAGGTCAGCAGAAGGCAGTTCTTTAAGATCTGCGCTGGCGGTATGGCAGG	1	-12.5	No	No	Yes	No
	spf	ycgZ	ATCGGATTTGGCTGAATATTTTAGCCGCCCCAGTCAGT	TGTGCCAAACTTCTTTGCCGACTGGAACACGCGA	1	-12.6	No	No	No	Yes
	ffs	dinG	AGGTCAGGTCCGGAAGGAAGCAGCCAAGGCAGATGACGCGTGTGCCGGGATGTAGCTGGCA	AAAACGCTGGCCGGAGAAGAAGGGCG	1	-14.5	No	No	No	Yes
	gcvB	gshA	ACTTCCTGAGCCGGAACGAAAAGTTTTATCGGAATGCGTG	TTTGCGGTGTGGCTGGAAAAACACGCCTGACAGAAAAGAAAAAGGCCACTCGTGAGTGGCC	1	-17.8	No	No	Yes	No
	cyaR	rpsK	CTGAAAAACATAACCCATAAAATGCTAGCTGTACCAGGAACCACCTCCTT	CCGGTGGTTCCGGTTTCCGT	6	-21.1	Yes	No	Yes	No
	micA	hupB	CGCGCATTTGTTATCATCATCCCTGAATTCAGAGATGAAATTTTGGCCACTCACGAGTGGCCTTTTTCTT	AAGAGATCACCATCGCTGCTGCTAAAGTACCGAGCTTCCGTGCAGGTA	5	-20.7	Yes	No	Yes	Yes
	chiX	tsaD	AAGTGACGGCATAATAATAAAAAAATGAAATTCCTCTTTGACGGGCCAATAGCGATATTGGCCATTTTTTTA	AGTCGGCGCGCTACTGGTTGGCGCGACCGTGGGGCGTTCTCTGGCGT	1	-27.3	No	No	No	Yes
	spf	gatY	ATGTTCTATCTTTCAGACCTTTTACTTCACGTAATCGGATTTGGCTGAATATTTTAGCCGCCCCAGTCAGT	GAACTTACCGCTGGTGCTGCATGGCGCGTCAGGGTTATCGAC	1	-19.1	No	No	Yes	No
	gadY	hns	AACAGGGAGTGTTATAACGGTTTATTAGTCTGGAGACGGC	AAGGCCGTACTCCAGCTGTAATCAAAAAAGCAATGGATGAGCAAGGTAAATCCCTCGACGATTTCCTGATCAAGCAA	2	-32.4	No	No	No	Yes
	chiX	gmr	AAGTGACGGCATAATAATAAAAAAATGAAATTCCTCTTTGACGGGCCAATAGCGATATTGGCCATTTTTTTA	TTTGCGTTTTTACCCCAGAAATGAATCAACG	1	-9.6	No	No	No	Yes
	omrB	ffh	CAGAGGTATTGATAGGTGAAGT	TATCAGTGGCCGTGGACGCCTCACTGAAGACAACGTAAAAGATACGCTGCGCGAAGTGCGCATGGCGCTG	1	-13.6	No	No	Yes	No
	ryeA	rbsK	TTCCTGTATTCGGTCCAGGGAAATGGCTCTTG	TGCGCTTAACCCGGCTCCGGCTCGCGAACTTCCTGACGAACTGCTGGCGCTGGTGGACATTA	1	-17.4	No	Yes	No	No
	arcZ	trmI	TTTCCCTGGTGTTGGCGCAGTATTCGCGCACCCCGGT	GTAGTTTTGTGCGCCGCCAGGGGCGACTG	8	-25.9	No	Yes	Yes	Yes
	arrS	zapA	GTAATCCGATTTAAATATCGAGTCTCCTTGTTTCGACTTAAGCTGGCAATTGGATTGCCAGCTTTCTTTT	AGCAGACCATAGAACAAGCGTTACTTGAACA	1	-17.4	No	No	Yes	No
	ryeA	gshA	GCTTCTGGCTTTTAACAGATAAAAAGAGACCGAACACGATTCCTGTATTCGGTCCAGGGAAATGGCTCTTGGG	GATCTTTACGAGTACGTAGCGGGCCTTAAACAGGCAATCAAAA	1	-22.7	No	No	Yes	No
	spf	bamA	CGTAATCGGATTTGGCTGAATATTTTAGCCGCCCCAGTCAGT	TTTACGTCACGGTGAACATCACCGAA	1	-9.8	No	No	Yes	No
	ryeA	yodD	AAGTCAGCGAAGGAAATGCTTCTGGCTTTTAACAGATAAAAAGAGACCGAACACGATTCCT	CTGAAGTGAATCGTTGAATGCACAATAAAAAAATCCCGACCCTGAGGGGGTCGGGATGAAACTTGCTTAAGCA	1	-20.3	No	No	No	Yes
	micA	phoP	GAAAGACGCGCATTTGTTATCATCATCCCTGAATTCAGAGATGAAATTTTGGCCACTCACGAGTGGCCTTTTTCTTTT	ATAATTAAGACAGGGAGAAATAAAAATGCGCGTACTGGTT	15	-27.7	Yes	Yes	Yes	No
	arcZ	crp	TTTCCCTGGTGTTGGCGCAGT	AGTACCCATCCAAGAGCACGCTTATTCACCAGGGTGAAAAA	1	-21.5	Yes	No	No	Yes
	cyaR	yohP	AAATGCTAGCTGTACCAGGAACCACCTCCTTAGCCTGTGTAATCT	ATTGATTATTTTCCTGATTGGGCTACTGGTGGTGACTGGCGT	2	-29.2	No	No	Yes	Yes
	arcZ	mraY	TTTCCCTGGTGTTGGCGCAGTATTCGCGCACCCCGGTCTA	ATACCGTATCTGCGACACGCCGGGGAACTG	2	-29.2	No	No	No	Yes
	arrS	cyoA	ATTTAAATATCGAGTCTCCTTGTTTCGACTTAAGCTGGCAATTGGATTGCCAGCTTTCTTTT	AAACGCCACCAGATCCCGTGGAATTGAGGTCGTTAAATGAGACTCAGGAAATACAATAAAAGT	1	-25.3	Yes	No	No	Yes
	gcvB	sdhD	ATTGCGGTGCTTTTTTTTA	ACTGTCGTGCTTTCACTTCTCGCAGGAGTCCTCGTATGGTAAG	1	-8.3	No	Yes	No	No
	gcvB	anmK	TTATCGGAATGCGTGTTCTGGTGAACTTTTGGCTTACGGTTGTG	AACAGGCTGTACTGGATATTTG	1	-8.5	No	Yes	No	No
	omrB	ykfB	CCCAGAGGTATTGATAGGTGAAGTCAACTTCGGGTTGAGC	TAACGCCTGGTTTGACTTCATCAGCAATATCTCTGAGGCCGG	2	-39.4	No	Yes	Yes	No
	chiX	feaR	AAAGTGACGGCATAATAATAAAAAAATGAAATTCCTCTTTGACGGGCCAATAGCGATATTGGCCATTTTTTTA	CAGTGGATAATGAGTTTCAGCAATGGCTTTCCCAAATCAATCAGGTATGCGGAAATTTTACCGGA	1	-23.1	No	No	Yes	No
	chiX	ydgK	GACGGCATAATAATAAAAAAATGAAATTCCTCTTTGACGGGCCAATAGCGATATTGGCCATTTTTTTA	TATTGGAGGCTGGTTGCTTGGCCCGTTGGCCTG	1	-30.9	No	No	Yes	No
	cyaR	ftsZ	CTGAAAAACATAACCCATAAAATGCTAGCTGTACCAGGAACCACCTCCTT	GTATGGGTGGTGGTACCGGTACAGGTGCAG	23	-33.9	Yes	Yes	No	No
	arrS	aceA	GATTTAAATATCGAGTCTCCTTGTTTCGACTTAAGCTGGCAATTGGATTGCCAGCTTTCTTTT	ATCTGCACATGAAAACCCGTACACAACAAATTGA	1	-5.9	No	No	No	Yes
	cyaR	fbaA	CTGAAAAACATAACCCATAAAATGCTAGCTGTACCAGGAACCACCTCCTTAGCCTGTGTAATCTCCCTTACACGGGCTTATTTTTT	TATTCCACGGTGGTTCCGGTTCTAC	5	-21.1	No	Yes	No	No
	chiX	gadA	AAAGTGACGGCATAATAATAAAAAAATGAAATTCCTCTTTGACGGGCCAATAGCGATATTGGCCATTTTTTTA	ATCTTGATGGCAACGCTCGTCAGAACCTGGCCACTTTCTGCCAGACCTGGGACG	1	-24.5	No	No	No	Yes
	mgrR	ompA	ATTCGTTATCAGTGCAGGAAAATGCCTGTTAGCGTAAAAG	AACGAGGCGCAAAAAATGAAAAAGACAG	1	-10.3	No	Yes	No	No
	arrS	pabB	AAATATCGAGTCTCCTTGTTTCGACTTAAGCTGGCAATT	AACTCAGCGAAAGATCG	1	-10.5	No	No	No	Yes
	chiX	ytfK	AAAGTGACGGCATAATAATAAAAAAATGAAATTCCTCTTTGACGGGCCAATAGCGATATTGGCCATTTTTTTA	AAATTTGCGCCTCATAATAGTTGGGCCGATTGTGGCACCGCACAGGCGTAATACTCAGCAGGAGATAACAATGAAAATTTTCCAACGGTACAA	5	-24.9	No	No	Yes	Yes
	gcvB	cycA	TTTTTCACTTCCTGTACATTTACCCTGTCTGTCCA	AACACAGACAGGTACAGGAAGAAAAAAACATGG	11	-27.7	Yes	Yes	Yes	Yes
	arrS	ibaG	CGATTTAAATATCGAGTCTCCTTGTTTCGACTTAAGCTGGCAATTGGATTGCCAGCTTTCT	CATGAGTCGGGTTAAAAAACAGCAGACGGTCTATGGTCCGCTGATGGAATATATTGCGGATAA	1	-21.3	No	No	No	Yes
	micA	msyB	CGCATTTGTTATCATCATCCCTGAATTCAGAGATGAAATTTTGGCCACTCACGAGTGGCCTTTTTCTT	ATACGCCAGGAGTGGCAGGAAGAGAATACATTACATGAATGGGAC	1	-27.5	No	No	Yes	No
	arcZ	yjjM	TTTCCCTGGTGTTGGCGCAGTATTCGCGCACCCCGGTCTAGC	CTTTTTTCACGATGATAAACCAGCGCCAGTTACGCCCAGGGGAAACGT	11	-28.9	No	Yes	Yes	Yes
	rydC	glyA	GGTTTTAGTACAGGCGTTTTCTT	TTGTTAGCTGAGTCAGGAGATGCGGATGTTAAAGCGTGAAATGAACATTGCCGATTATGAT	1	-15.4	No	No	Yes	No
	spf	hupB	CTATCTTTCAGACCTTTTACTTCAC	TGGCCGTGCGTTAGATGCTATTATTGCTTCCGTAACTGAATCTCTGAAAGAAGGGGATGATGTAGCACT	1	-13.2	No	No	Yes	No
	spf	pfo	ATCGGATTTGGCTGAATATTTTAGCCGCCCCAGTCAGT	TTACGATCTGGCACTCAGCC	2	-12.5	No	No	No	Yes
	arrS	fabB	GTAATCCGATTTAAATATCGAGTCTCCTTGTTTCGACTTAAGCTGGCAATTGGATTGCCAGCTTTCTTTTA	CATCGTGTTTGCTGGCGGCGGCGAAGAGCTGTGCTGGGA	1	-23.8	No	No	Yes	No
	spf	rppH	AGATGTTCTATCTTTCAGACCTTTTACTTCACGTAATCG	TGGCGATGGGTAAGTTACT	1	-7	No	Yes	No	No
	chiX	putP	GGCATAATAATAAAAAAATGAAATTCCTCTTTGACGGGCCAATAGCGATATTGGCCATTTTTTT	TCTCTGCGCTGGTTATTTTGCTGTTCTTCACCATTTATTGCGCTTCGG	1	-16.9	No	No	Yes	No
	chiX	hdeA	AAGTGACGGCATAATAATAAAAAAATGAAATTCCTCTTTGACGGGCCAATAGCGATATTGGCCATTTTTTTA	ATTAGGCGTTATTCTTGGTGGTC	1	-12.7	No	No	No	Yes
	arcZ	gcvT	ATTTCCCTGGTGTTGGCGCAGTATTCGCGCACCCCGGTC	ATCGTCGATCTTCGCGGCAGCCGCACCCGGGAGTTTCTGC	6	-26.8	Yes	No	Yes	No
	arcZ	yfiM	TCCCTGGTGTTGGCGCA	TATTCACAGCATCAGGGGATGAGC	1	-20.3	No	No	Yes	No
	gcvB	wzyE	CGGTTGTGATGTTGTGTTGTTGTGTTTGCAATTGGTCTGCGATTCAGACCATGGTAGCAAAGCTACCTTTTTTCAC	TGATCGTGCTGGCGCGTGAAGGGCTGGATTCGTTTGTCTCACGCGTGGTCTTTTTTATCG	1	-24.9	No	No	Yes	No
	arcZ	dctR	TTTCCCTGGTGTTGGCGCAGTATTCGCGCACCCCGGTCTAGC	AATTACCTTTGGCAAACTGATTATAAAGTTAATGTCCGCACCAGGAGTCGGTTATGTTTCTTATAATTACCAGGGATACG	18	-23.7	No	No	Yes	Yes
	arrS	raiA	AATCCGATTTAAATATCGAGTCTCCTTGTTTCGACTTAAGCTGGCAATTGGATTGCCAGCTTTCTTT	ATGTCGCAGACCGTCTCGCCAAACTGGAAAAATGGCAAACACATCTGATTAATCCACATATCAT	1	-17.9	No	No	Yes	No
	arrS	npr	GTAATCCGATTTAAATATCGAGTCTCCTTGTTTCGACTTAAGCTGGCAATTGGATTGCCAGCTTTCTTTTA	TTCTGCCAAAGGACGGCAGA	1	-13.5	No	No	No	Yes
	chiX	ycaD	AAAGTGACGGCATAATAATAAAAAAATGAAATTCCTCTTTGACGGGCCAATAGCG	GTCTGCTTGGCCCGTCATTTACCGCTATGCTAATGCAGAATTTCTCCGATAATTTATTGTTTATCAT	3	-31.4	No	No	Yes	Yes
	chiX	miaA	AAGTGACGGCATAATAATAAAAAAATGAAATTCCTCTTTGACGGGCCAATAGCGATATTGGCCATTTTTTTA	ATTGAGCAGCGTTTTCATCAGATGTTGGC	1	-11.2	No	No	No	Yes
	spf	dadA	ATCGGATTTGGCTGAATATTTTAGCCGCCCCAGTCAGTAATG	TCATACTGGGAAGTGGTGTGGTAGGCGTTGCCAGCGCCTGGTACTTAAATCAGGCAGGA	1	-27.8	No	No	No	Yes
	arrS	lnt	TAATCCGATTTAAATATCGAGTCTCCTTGTTTCGACTTAAGCTGGCAATTGGATTGCCAGCTTTCTTTT	ATTGGCTTTTGCTGGGGATTTGGCCTCTTTGGCAGCGGTATTAACTGGGTCTATGTC	1	-28.5	No	No	No	Yes
	spf	ahpC	TCTTTCAGACCTTTTACTTCACGTAATCGGATTTGGCTGAATAT	TGACCCGTAACTTCGACAACATGCGTGAAGATGAAGGTCTGGCTGACC	3	-30.8	No	Yes	No	Yes
	arrS	hdeB	TAAATATCGAGTCTCCTTGTTTCGACTTAAGCTGGCAATTGGATTGCCAGCTTTCTT	ATTTCATCTCTCCGTAAAGCGTTTATTTTTATGGGCGCTGT	1	-10	No	No	No	Yes
	arrS	gatB	AATCCGATTTAAATATCGAGTCTCCTTGTTTCGACTTAAGCTGGCAATTGGATTGCCAGCTTTCT	ATTCTGACTATCTTACAGGGGTGACCTATGTTTTCAGAAGTCATGCGTTATATTCTCGACCTCG	1	-20.4	No	No	Yes	No
	cyaR	ompA	AAAATGCTAGCTGTACCAGGAAC	AAGATAACACCTGGTACACTGGTGCTAAACTGGGCTGGTCCCA	3	-22	Yes	No	Yes	No
	arrS	tam	AATCCGATTTAAATATCGAGTCTCCTTGTTTCGACTTAAGCTGGCAATTGGATTGCCAGCTTTCTTTTA	CACTTTTCCGCTGAACGATCGCGTCCGGCGGTGGAGCTGCTTGCCAGAGTGCCGCTGGAAAAT	1	-26.6	No	No	No	Yes
	arcZ	rplS	TTCCCTGGTGTTGGCGC	GACAGCATTTCTGTCAAACGTCGTGGTGCTGT	1	-8.7	No	No	No	Yes
	chiX	fabZ	AAAGTGACGGCATAATAATAAAAAAATGAAATTCCTCTTTGACGGGCCAATAGCGATATTGGCCATTTTTTT	ACAGGAAGAGTATCTTGACTACTAACACTCATACTCTGCAGATTGAAGAGATTTTAGAACTTCT	1	-11.7	No	No	No	Yes
	cyaR	narW	CAGGAACCACCTCCTTAGCCTGTGTAATCTC	CAATATGTCGACATCAGTGCGGGAGGTGGGAAAT	9	-25.4	Yes	No	Yes	No
	spf	yqiA	TTTTACTTCACGTAATCGGATTTGGCTGAATATTTTAGCCGCCCCAGTCAGT	ACCATCTCTGACGATCAACTCGAATTACTAACTTAAACCATGACGCAAACTTATAACGCTGAT	1	-11.2	No	No	No	Yes
	gcvB	ybjI	ATTGCGGTGCTTTTTTTT	CATGAGGCCATCGGCGATATT	1	-10.5	No	No	No	Yes
	gcvB	kefB	ATTTACCCTGTCTGTCCATAGTGATTAATGTAGCACCGCCTA	TATTACAGGCAGGGGTGACG	4	-18.7	No	Yes	Yes	No
	ryeA	aroH	GCTTCTGGCTTTTAACAGATAAAAAGAGACCGAACACGATTCCTGTATTCGGTCCAGGGAAATGGCTCTTGGG	CGGCGATTGCTGGAATTATGGCGGAAAGTTTCCTGC	1	-20.9	No	No	No	Yes
	gadY	acrB	ATTAGTCTGGAGACGGCAGACTATCCTCTTCCCGGTCCCCTATGCCGGGTTTTTTT	TGTTGGCAGGGGGGCTGGC	1	-27.2	No	No	No	Yes
	mgrR	murI	CAAGCATTCACCGCCGG	TTTCCCTCTACTACAAGAAGAACTGTTACAAGTGCTGCCAGAGGGAACCCGGCTGGTGGATTCT	5	-19.4	No	Yes	No	No
	arcZ	gpsA	TTCCCTGGTGTTGGCGCAGTATTCGCGCACCCCGGTCTAGC	ACTAGGTCGTGCACGCAAGGACGAGCGCAGCAGCCACTAACCCCAGGGAACCTTTGTTACCGCTATGACCCGGCCCGCGCAGAACGGGCCGGTCATTATCTC	6	-34.6	Yes	Yes	Yes	Yes
	arcZ	hscA	CCTGGTGTTGGCGCAGTATTCGCGCACCCCGGTCT	TTTGAGTGCTGCGCCGCATCA	5	-28.9	No	No	Yes	No
	dsrA	rmf	ATTTTTTAAGTGCTTCTTGCTTAAGCAAGTTTCATCCCGACCCCCT	CATGGCGGACAGGGTAGTAATGGCCTGATTCTGTCTCTTTAAAAAGAAACCTCCGCATTGCGGAGGTTTCGC	1	-19.3	No	No	Yes	No
	mgrR	cycA	AAGCATTCACCGCCGGTTTA	CGGCTTATGCTCAGTTCTGGTTCCCCGATCTCTCCGACTGGGTCGCCTCGCTGGCGGTGAT	3	-21.4	Yes	No	No	Yes
	gadY	secY	TCCCGTGCCAACAGGGAGTGTTATAACGGTTTATTAGTCTGGAGACG	ATCCAGCTGCTGACGGTGGTTCACCCAACGT	1	-18.6	No	Yes	No	No
	omrB	rluE	AGAGGTATTGATAGGTGAAGTCA	CAAAACATTAAAAGAAT	1	-1.7	No	No	No	Yes
	ryeA	yccE	GAAGGAAATGCTTCTGGCTTTTAACAGATAAAAAGAGACCGAACACGATTCCTGTATTCGGT	TTCTGTTTTTTAAAAAACAA	1	-7	No	No	No	Yes
	arcZ	ypfM	TTTCCCTGGTGTTGGCGCAGTATTCGCGCACCCCGGTCTA	TATGATTGAACGTGAACTGGGGAACTGG	13	-17.6	Yes	Yes	Yes	No
	chiX	ppk	AAAGTGACGGCATAATAATAAAAAAATGAAATTCCTCTTTGACGGGCCAATAGCGATATTGGCCATTTTTTTA	GTTCCGCAATGGTTTTGATGCCATTCGCGAACGCGATGTGTTGCTCTATTATCCTTATC	2	-17.2	No	No	No	Yes
	chiX	ldtD	CTCTTTGACGGGCCAAT	GCTATTGGCCCGGCAACAC	1	-18.1	No	No	Yes	No
	ryeA	gshA	AAAAGAGACCGAACACGATTCCTGTATTCGGTCCAGGGAAATGGCTCTTGGG	CCGTTTGCGGTGTGGCTGGAAAAACACGCCTGACAGAAAAGAAAAAGGCCACTC	1	-19.9	No	No	No	Yes
	spf	tnaB	CGTAATCGGATTTGGCTGAATATTTTAGCCGCCCCAGTCAG	GCACTCTGCATTTTGGGGTGTTATGGTTATAGCAGGTACAGTAATTGGTGGAGGTATGTTTG	1	-20.4	Yes	No	Yes	No
	chiX	ansA	AATAATAAAAAAATGAAATTCCTCTTTGACGGGCCAATAGCGATATTGGCCATTTTTTTA	TCAATATCATGCAAAAGAAATCAATTTACGTT	1	-8.4	No	No	No	Yes
	arrS	arcB	TGTAATCCGATTTAAATATCGAGTCTCCTTGTTTCGACTTAAGCTGGCAATTGGATTGCCAGCTTTCTT	CTTCCTTGCCGATCTGGAAAATCTCTCCGCATTGCAGGCGCAACAAAAAGGATTGCGCTTTAACCT	1	-23.7	No	No	Yes	No
	cyaR	yncL	CTGAAAAACATAACCCATAAAATGCTAGCTGTACCAGGAACCACCTCCTTA	TTGTTTACTCTTATCTCTATGAGATTTGGCTGGTTTATTTGATGTAGTGATTTTGCACGCAGCACGTACTGTC	1	-15.7	No	No	Yes	No
	arrS	lon	ATCGAGTCTCCTTGTTTCGACTTAAGCTGGCAAT	TGGCGGAAATTAAACTAAGAGAGAGCTCTATGAATCCTGAGCGTTCTGAACGCATTGAAATCCCCGTATTGC	1	-15.1	No	No	No	Yes
	gcvB	fabR	CTTCCTGAGCCGGAACGAAAAGTTTTATCGGAATGCGTGTTCTGGTGAACTTTTGGCTTACGG	GTTCGCTGGTGGAAGCCGCATTTAGCCAATTAAGTGCTGAACGCAGCTTCGCCAGCCTGAGTTTGCGTG	1	-28	No	No	Yes	No
	arcZ	dsbC	TCCCTGGTGTTGGCGCAGTAT	TATCTTGCTTTCCCGCGCCAGGGGCTGGACA	2	-24.1	No	No	No	Yes
	cyaR	crr	GAAAAACATAACCCATAAAATGCTAGCTGTACCAG	ATTGCTCCGCTCTCTGGCGAGATCGT	1	-6.5	No	No	No	Yes
	omrB	rfbA	AGAGGTATTGATAGGTGAAGTCA	ATGATGAAATGAAAATGCGTAAAGGTATTATTTTAGCGGGTGGTTCTGGTACA	1	-7.3	No	No	Yes	No
	arrS	yadD	AAATATCGAGTCTCCTTGTTTCGACTTAAGCTGGCAATTGGATTGCCAGCTTTCTT	TGCTGCAACGCGGTCATACTGAA	1	-11.6	No	No	No	Yes
	ryeA	yebO	GAAGGAAATGCTTCTGGCTTTTAACAGATAAAAAGAGACCGAACACGATTCCTGTATTCGGTC	GTTGTAAATTCAGGCGTGATGAACATTGCGTCTTTGGTTGTATCGGTGGTGGTTCTTCT	1	-23.2	No	No	No	Yes
	arcZ	yjhF	TTCCCTGGTGTTGGCGCAGTATTCGCGCACCCCGGTCT	TTGCTGTCGCCATCGCCAGTGGTATG	23	-28.8	No	Yes	Yes	No
	arrS	rseP	TAAATATCGAGTCTCCTTGTTTCGACTTAAGCTGGCAATTGGATTGCCAGCTTTCTTTTA	TTACCTGCCGTTTCTTGCGCTTATTAGCGTG	1	-12.4	No	No	No	Yes
	chiX	yigZ	ACGGCATAATAATAAAAAAATGAAATTCCTCTTTGACGGGCCAATAGCGATATTGGCCATTTTTT	TTGTTAGCGATTGAAGAATAATCCCCACTTCGTTTTGCAGAACTAAGGAAGCGGCAGAG	1	-12.2	No	No	No	Yes
	arcZ	torT	TTCCCTGGTGTTGGCGCAGTATTCGCGCACCCCGGTCT	CGCTGTCACCAGGGGGATTTCGT	1	-23.8	No	No	Yes	No
	cyaR	cysJ	GCTGAAAAACATAACCCATAAAATGCT	TATTAGCAGCAAAACTGAACGTTAAG	1	-6.5	No	No	Yes	No
	sibB	yafK	AGGGTAGAGCGGGGTTTCCCCCGCCCTGGTAGTCTTAGTAAGCGGGGAAGCTTATGACTAAG	TAACCGTTTTATCAAGGAATAAGCAGTATGCGTAAAATCGCATTAATTCTTGCGATGTTGTTGATCCCGTGC	1	-24.7	No	No	No	Yes
	spf	uspA	AGGGTACAGAGGTAAGATGTTCTATCTTTCAGACCTTTTACTTCAC	CTACTCTGACCTATACAC	1	-12.9	Yes	No	Yes	No
	arrS	rlmI	GTAATCCGATTTAAATATCGAGTCTCCTTGTTTCGACTTAAGCTGGCAATTGGATTGCCAGCTTTCTTTTA	ATTTGACGTTATCGTGATGGACCCGCC	1	-8.3	No	No	No	Yes
	arcZ	rbsD	AGATTTCCCTGGTGTTGGCGCAGTATTCGCGCACCCCGGTCTAGC	ACGAAACGTTGCTCACTCACCTTGAGCAGCTGCAAAAACACCAGGGAAATACCATT	223	-34.5	Yes	Yes	Yes	Yes
	micA	waaA	TTTGTTATCATCATCCCTGAATTCAGAGATGAAATTTTGGCCACTCACGAGTGGCCTTTTTC	CACGTTTTGTGGCGCTGGGCGCAAAAAATAATCAGGTGACCGTTACCGGTAGCCTGAAATT	1	-21.4	No	No	No	Yes
	gcvB	yedQ	CATTTACCCTGTCTGTCCATAGTGATTAATGTAGCACCGCCT	AAAAAGCAGGTTGGGAGTCGTCAGGGTGC	3	-16.6	No	No	Yes	No
	rybB	cysP	GCCACTGCTTTTCTTTGATGTCCCCATTTTGTGGAGCCCATCAACCCCGC	TATCTGGCGGCATGGGGCGCAGCGGATAAAGCTGACGGTG	1	-25.3	No	No	Yes	No
	cyaR	yjhB	CTGAAAAACATAACCCATAAAATGCTAGCTGTACCAGGAACCACCTCCTTAGCCTGTGTAATCTC	TTGGAGGTGGTTTTTTTGGTGCCATG	1	-28.9	No	No	Yes	No
	spf	rimP	CGTAATCGGATTTGGCTGAATATTTTAGCCGCCCCAG	TAGGCCCTTTTTTTATGTCTTGGGGGTGGGCTT	1	-16.1	No	No	Yes	No
	rdlD	ygcG	TAGCCCCCGTGGTGTTGTC	ACAACAGCGGTTCCGCTGGAGGCTCAGATAGCGGCGGATTTAGCGGCGGGGGCGGTTC	2	-25.4	No	No	Yes	No
	chiX	wzyE	AAGTGACGGCATAATAATAAAAAAATGAAATTCCTCTTTGACGGGCCAATAGCGATATTGGCCATTTTTTT	ATGATCGTGCTGGCGCGTGAAGGGCTGGATTCGTTTGTCTCACGCGTGGTCTTT	1	-35.4	No	No	Yes	No
	arrS	dcuA	GTAATCCGATTTAAATATCGAGTCTCCTTGTTTCGACTTAAGCTGGCAATTGGATTGCCAGCTTTCT	GCTGGCGGTTCTGGTGATGTCCTTCCTGGTCAC	1	-24.7	No	No	No	Yes
	dsrA	aceB	CCCCCTCAGGGTCGGGATTTTTT	TTCCGATGAGTTAATTGATTTCCTGACCCTGCC	2	-21.7	No	No	No	Yes
	arrS	hupB	GTAATCCGATTTAAATATCGAGTCTCCTTGTTTCGACTTAAGCTGGCAATTGGATTGCCAGCTTTCTTTTA	ATTATTGCTTCCGTAACTGAATCTCTGAAAGAAGGGGATGATGTAG	1	-22.6	No	No	Yes	No
	spf	yaaJ	GGGTACAGAGGTAAGATGTTCTATCTTTCAGACCTTTTACTTCAC	AACAATTGGTAACGTTTACACAGGAAAGTCATCGCGACCGGCAATAAGAGGGATATGCATGCCA	1	-14.4	No	No	Yes	No
	arcZ	mqsA	TTCCCTGGTGTTGGCGCAGTATTCGCGCACCCCGGTC	AATATGAAATGTCCGGTTTGCCACCAGGGAGAAA	25	-25.7	Yes	Yes	Yes	Yes
	arcZ	oppB	TTCCCTGGTGTTGGCGCAGTATT	TTACTATTTCGTTCTTTATGATGCGCCTCGCGCCGGGAAGCCCT	10	-27.1	No	No	No	Yes
	omrA	ulaA	ACCCTGTCTCTTGCACCAACCTGCGCGGATGCGCAGGTTTTTTTT	TTCATGTTGTTGCAGGCAGGGTCCGG	2	-21.8	No	No	Yes	No
	dsrA	rodZ	GCTTCTTGCTTAAGCAAGTTTCATCCCGACC	CGGCGGAACTGAGCAGTAATAGCGAGCAGGGGCAGAGTGTTCCATTAAATACGT	1	-20.1	No	No	No	Yes
	arrS	oppA	GTAATCCGATTTAAATATCGAGTCTCCTTGTTTCGACTTAAGCTGGCAATTGGATTGCCAGC	AAGAGAAGTTTAGTAGCAGCTGGCGTTCTGGCTGCGCTAATGGCAGGGAATGTCGCGCTGGCAGCTGATGT	1	-32.5	No	No	Yes	Yes
	spf	mrdA	TAGGGTACAGAGGTAAGATGTTCTATCTTTCAGACCTTTTACTTCACGTAATCGGATTTGGCTGAATATTTTAGCCGCCCCAGTCAGTAAT	TATCCCTCTGGCCCTCAACCG	1	-18.2	No	Yes	No	No
	spf	gadB	GTAGGGTACAGAGGTAAGATGTTCTATCTTTCAGACCTTTTACTTCAC	TGGTGCGAAGTCTATTTCCACTATCGCAGAATCAAAACGTT	1	-10.2	No	No	No	Yes
	spf	yebO	GTAGGGTACAGAGGTAAGATGTTCTATCTTTCAGACCTTTTACTTCAC	TTGTAAATTCAGGCGTGATGAACATTGCGTCTTTGGTTGTATCGGTGGTGGTTCTTC	1	-23.5	No	No	No	Yes
	spf	rplO	TATTTTAGCCGCCCCAGTCAGT	CGGCCGAAGGCTCCAAAAAGGCG	1	-8.9	No	Yes	No	No
	omrA	treC	TCGGTACGCTCTTCGTACCCTGTCTCTTGCACCAACCTGCGCGGATGCGCAGGTTTTTTTT	TGTGGTGAATCTGATCTCCAAAGACCCGCGTTTCCCTGAAGACCTGGACGGCGACGGGCGTCGCTT	1	-36	No	No	Yes	No
	chiX	tufB	ACGGCATAATAATAAAAAAATGAAATTCCTCTTTGACGGGCCAATAGCGATATTGGCCATTTT	GTCCGCAGTTCTACTTCCGTACTACTGACGTGACTGGTACCATCGAACTGCCGGAAGGCGTAGAGATGGTA	1	-18.4	No	No	No	Yes
	spf	yaaX	ATTTTAGCCGCCCCAGTCAG	CGCCACCGCCGCGCCAC	1	-4.7	No	No	Yes	No
	spf	aceK	ATTTTAGCCGCCCCAGTCAGTA	GTACGGACGCGGCATTTTTACTACGTGTTAAAGAGCATTACACCCGGCTGTTGCCGGATTACCCGCGCT	1	-13.6	No	No	Yes	No
	arcZ	icd	TTCCCTGGTGTTGGCGCAGTATTCGCGCACCCCGGT	TTCTCTCCGCTGAGATGATGCTGCGCCACATGGGTTGGACCG	2	-32.7	No	No	No	Yes
	rydC	yiaJ	CTTCCGATGTAGACCCGTATTCTTCGCCTGTACCA	GGGATTTACTGTCAGGGATGACCTG	1	-14.4	No	No	Yes	No
	gadY	clpX	TTCCCGTGCCAACAGGGAGTGTTATAACGGTTTATTAGTCTGGAGACGGCAGACT	GATCTGCCGTCCATGGAAGAC	2	-19.4	No	No	Yes	No
	omrB	sdhB	AGGTGAAGTCAACTTCGGGTTGAGCA	TTATCGCTATAACCCGGATGTTGATG	1	-23.6	No	No	Yes	No
	gcvB	ytfK	GTTTTATCGGAATGCGTGTTCTGGTGAACTTTTGGCTTACGGTTGTG	GAAGTTAACCGTCAGGTTATGCGTCTGCAAACAGAGA	1	-21.4	No	No	No	Yes
	spf	cyoC	CGTAATCGGATTTGGCTGAATATTTTAGCCGCCCCAGTCAG	CAGCGGCTTCCTGTCAGCGTTCTTTGC	1	-20.7	No	No	No	Yes
	ryeA	hupB	TTCTGGCTTTTAACAGATAAAAAGAGACCGAACACGATTC	CTATTATTGCTTCCGTAACTGAATCTCTGAAAGAAGGGGATGATGTAGCA	1	-12.1	No	No	Yes	No
	gcvB	flc	TTTCACTTCCTGTACATTTACCCTGTCTGTCCATAGTGATTAATGTAGCACCGCCT	TTTTATTGGCGGTGGTACGGGAAGCGTGGC	3	-24.4	No	Yes	No	No
	omrB	xdhA	TCCCAGAGGTATTGATAGGTGAAGTC	CTGCTATACCAACCTCCC	1	-10.1	No	No	Yes	No
	arrS	cra	GTAATCCGATTTAAATATCGAGTCTCCTTGTTTCGACTTAAGCTGGCAATTGGATTGCCAGCTTTCTTTT	TTACGCAAGGGGCAATTGTGAAACTGGATGAAATCGCTCGGCTGGCGGGAGTGTCGC	1	-26.7	No	No	Yes	No
	gadY	recB	GTTTATTAGTCTGGAGACGGCAGACTATCCTCTTCCCGGTCCCCTATGCCGGGTTTTTTTT	ACAATCCACTGTACGAACGCCTGCTGGAAGAGATCGACGATAAAGCGCAAGCCGCGCAGTGGTTGTTG	1	-21.9	No	No	No	Yes
	arrS	ygaM	GTAATCCGATTTAAATATCGAGTCTCCTTGTTTCGACTTAAGCTGGCAATTGGATTGCCAGCT	AAAGCTCAGGCATTGCTGAAAGAAACCAGGGCGCGAATGCATGGTCGTACTCGCGTCCAGCAAGCCGCGCGC	1	-25.4	No	No	No	Yes
	arrS	miaA	AATATCGAGTCTCCTTGTTTCGACTTAAGCTGGCAATTGGATTGCCAGCTTTCTTTT	CATCAGATGTTGGCTTCAGGTTTTGAAGCAGAAGT	1	-21.5	No	No	No	Yes
	arrS	aceK	GTAATCCGATTTAAATATCGAGTCTCCTTGTTTCGACTTAAGCTGGCAATTGGATTGCCAGCTTT	TGAGGGCGCTAAATGCCGCGTGGCCTGGAATTATTGATTGCTCAAACCATTTTGCAAGGCTTCGATGCTCAGTATGGTCGATTCCTCGAAGTGACCTCCGGTGCGCAGCAGCGTTTCGAACAGGCCGACTGGCATGCTGT	2	-33.5	No	No	Yes	Yes
	chiX	mdtB	AAAGTGACGGCATAATAATAAAAAAATGAAATTCCTCTTTGACGGGCCAATAGC	TTTGCTGTTCGACCGCCTGGCATTGTGGACCAAAAGCCGCTTTGCCCGTCA	3	-22.1	No	No	No	Yes
	arrS	ynhF	GTAATCCGATTTAAATATCGAGTCTCCTTGTTTCGACTTAAGCTGGCAATTGGATTGCCAGCTTTCTTTT	TTTGTGTGGTAATAAAAAAGGAGAAAACTTGATGAGCACCGACCTTAAATTTTCAC	1	-19.7	No	No	Yes	No
	cyaR	cstA	TAGCTGTACCAGGAACCACCTCCTTAGCCTGTGT	CTTCTTTATGGTGGTCGTGGTGGTTCTGGCACTGTT	1	-24.6	Yes	No	Yes	No
	rprA	tolB	ATTGATTTATAAGCATGGAAATCCCCTGAGTGAAACAACGAATTGCTGTGTGT	TCTTCTCAGGGGATGGGATCCGTGCTGAATTTGGTT	3	-30.7	Yes	Yes	No	Yes
	mgrR	melB	AAGCATTCACCGCCGGTTT	TATGTCGGCGGTGGCGATCGGGGATTTGGCTTTCAGATG	2	-18.3	No	No	Yes	No
	ryeA	tar	AAGGAAATGCTTCTGGCTTTTAACAGATAAAAAGAGACCGAACACGATTCCTGTATTCG	GAACTGATTGATTATCTAGATTATGGCAATACTGGAGCTTATTTCGCTCAGCCAACCCAGGGAATGC	1	-16.5	No	No	No	Yes
	oxyS	bcsB	TTTAACCCTTGAAGTCACTGCCCG	GATTTGTGCAGTGGCTATGGGGATGAGTGCGTT	18	-21.6	No	No	Yes	No
	ryeA	dppA	GATAAAAAGAGACCGAACACGATTCCTGTATTCGGTCCAGGGAAATGGCTCTTGGGAGAGAGCCGTGCGCT	TGATGGGCTGGACTGGCGATAAC	1	-14.6	No	No	No	Yes
	cyaR	poxB	CTGAAAAACATAACCCATAAAATGC	CTCAGTAGTGCAGATGAA	1	-3.6	No	Yes	No	No
	ryeA	malT	AAAAGAGACCGAACACGATTCCTGTATTCGGTCCAGGGAAATGGCTCTTGGGA	ATTACGAAGCGCAAAAAAAATAATATTTCCTCATTTTCCACAGTGAAGTGATTAACTATGCTGA	1	-18.2	No	No	Yes	No
	ryeA	rnlA	AAGTCAGCGAAGGAAATGCTTCTGGCTTTTAACAGATAAAAAGAGACCGAACACG	GGCTGGGCTTCGGGTCGTATTTACCAGACCAGGGGTTAACTTGGCAACTGTGGACATTTTTTATAA	1	-24.1	No	No	Yes	No
	arrS	gtrS	TAAATATCGAGTCTCCTTGTTTCGACTTAAGCTGGCAATTGGATTGCCAGCTTTCTTT	TGTTATTATTTTTTATT	1	-2.6	No	No	No	Yes
	chiX	malM	AAGTGACGGCATAATAATAAAAAAATGAAATTCCTCTTTGACGGGCCAATAGCGATATTGGCCATTTTTTTA	TTTATCAGCAGTGTAAAAGGCAAGGGGTAATTACGCCCCACAGTGCTGATTTTGCAACAACTGGTGCGTCTCCTGGCGCACCTTTTTTT	5	-23.7	No	No	Yes	Yes
	ryeA	rmf	GCTTCTGGCTTTTAACAGATAAAAAGAGACCGAACACG	CCATGGCGGACAGGGTAGTAATGGCCTGATTCTGTCTCTTTAAAAAGAAACCTCCGCATTGCGGAGGTTTCGCC	1	-18	No	No	No	Yes
	dsrA	gdhA	ATTTTTTAAGTGCTTCTTGCTT	ATAAGGGTTTTATATCTATGGATCAGACA	1	-2.3	No	No	Yes	No
	cyaR	yehU	GCTGTACCAGGAACCACCTCCTTAGC	TTTTAAAGGGAAGTGTGGTTTGCGGGTAT	1	-20.4	Yes	No	Yes	No
	ryeA	ydhW	AAGTCAGCGAAGGAAATGCTTCTGGCTTTTAACAGATAAAAAGAGACCGAACACGATTCCTGT	TTAGCGAAAGTCAGCGAA	4	-10.1	No	No	Yes	Yes
	ryeA	fmt	AAGTCAGCGAAGGAAATGCTTCTGGCTTTTAACAGATAAAAAGAGACCGAACACGATTCCTGTAT	GCTGTTGTCTTCTGGTCATAACGTCGTTGGCGTGTTCACCCAGCCAGACCGACCGGCAGGACGCGGTAA	1	-26.1	No	No	Yes	No
	cyaR	cobB	AAATGCTAGCTGTACCAGGAACCACCTCCTTAGCCTGTGTA	TTTGCCGAGAAATATTACGGCCCGGCAAGCCAGGTGGTGCCTGAGTTT	1	-26.2	No	No	Yes	No
	gcvB	alsR	AAAAGTTTTATCGGAATGCGTGTTCTGGTGAACTTTT	ATTTCTTCTCACCAGGCGCGCTGAAA	3	-21.7	No	No	Yes	No
	micF	rbsC	GTCTGTTTACCCCTATTTCAACCGGATGCCTCGCATTCGGTTTTTTTTA	TTGTGGTCTGCTGGCATCGCTGGCCGGGATCATTGAAGTGGCGCGTCTCTCCTCCG	1	-22.7	No	No	No	Yes
	oxyS	rpoB	TCGAATAACTAAAGCCAACGTGAACTTTTGCGGATCTCC	TCCGTTCCGTTGGCGAAA	6	-18.8	No	Yes	No	No
	mgrR	yciQ	TCTATCCATGCAAGCATTCACCGCCGGTTT	TTATTCCGGTGGTGGTGCTGGCGGCGGCGCGGGTGGCGGAGGCGGTGGTGGCTGGTAATT	5	-31.9	No	Yes	Yes	Yes
	gcvB	yhhA	GTTGTGTTGTTGTGTTTGCAAT	AATAATTCTCAGCGGGTGTTG	1	-6	No	No	No	Yes
	mgrR	kgtP	TTATCAGTGCAGGAAAATGCCTGTTAGCGTAAAAG	ATCTTCTTCCCTTCCGGG	1	-4.7	No	Yes	No	No
	chiX	ychE	AAGTGACGGCATAATAATAAAAAAATGAAATTCCTCTTTGACGGGCCAATAGCGATATTGGCCATTTTTTTA	ACCGTGATTCAGACCTTTTTTGATTTTCCCGTTTACTTCAAATTTTTCATCGGGTTA	1	-14.4	No	No	Yes	No
	rprA	ompF	ATTGCTGTGTGTAGTCTTTGCCCATCTCC	ATTTGGTGGTGATACTGCATACAGCGAT	2	-27.5	Yes	No	Yes	No
	cyaR	gapA	AGCTGTACCAGGAACCACCTCCTTAGCCTGTGTA	CTGGTATCCTGGTACGACAACGA	19	-21.6	Yes	No	Yes	No
	chiX	tdcA	TAATAATAAAAAAATGAAATTCCTCTTTGACGGGCCAATAGCGATATTGGCCATTTTTTTA	GAAGTCTCATTTGGTTTTCCTTCATTGATTGGTTTTACTTTTATGTCAGGGATGATCAA	1	-21.5	No	No	Yes	No
	chiX	mpaA	ACGGCATAATAATAAAAAAATGAAATTCCTCTTTGACGGGCCAATAGCGATATTGGCCATTTTTTTA	AATACTTCCTGAACCAGAGACGATCATGACCGTAACCCGCCCACGCGCCGAACGCGGCGCATTTC	1	-16	No	No	Yes	No
	ryeA	yceF	GCTTCTGGCTTTTAACAGATAAAAAGAGACCGAACACGATTCCTGTATTCGGTCCAGGGAAATGGCTCTTGG	TGGCGTCGCGCTCTTCTGGAAAAACTGCAAATCTCTTTTGAATGTGCAGCACCAGAGGTCGA	1	-32.8	No	No	Yes	No
	gadY	ydhQ	TCCTCTTCCCGGTCCCCTA	AATGTGAAAGGGGAAGTTACCGGGGATATACACGTTGA	3	-21.7	No	No	No	Yes
	gadY	hsdM	TTATTAGTCTGGAGACGGCAGACTATCCTCTTCCCGGTCCCCTATGCCGGGTTTTTTTT	CATTCTGCGTCTGCCGA	1	-16.3	No	No	No	Yes
	arrS	csiE	AATCCGATTTAAATATCGAGTCTCCTTGTTTCGACTTAAGCTGGCAATTGGATTGCCAGCTTT	AAGGTACAGTGCTTAACCAACGTTTGTGTTTATTTCACTGGCTACGACGTGGTTTCCGTCTGTGTCCGT	1	-17.5	No	No	Yes	No
	ryeA	rssA	CGAAGGAAATGCTTCTGGCTTTTAACAGATAAAAAGAGACCGAACACGATTCCTGTATTCGGT	TCGTTGCAGGATGTTCAATTGGTTCGCTGGTGGGCG	1	-22.9	No	No	No	Yes
	spf	ydgD	TAGGGTACAGAGGTAAGATGTTCTATCTTTCAGACCTTTTACTTCACG	ATATGCGTACAACCATTGCTGTAGTGTTGGGTGCAATTAGTTTGACGTCTGCTTTTGTGTTTGCAGATAAACCA	1	-23.6	No	No	Yes	No
	spf	yjhB	TAGGGTACAGAGGTAAGATGTTCTATCTTTCAGACCTTTTACTTCAC	TCTTTTTTTTATTTCTG	1	-9.9	No	No	Yes	No
	spf	yeeZ	TAGGGTACAGAGGTAAGATGTTCTATCTTTCAGACCTTTTACTTCACGTA	TTAGGGTGGTTAGGCATGCCGCTGGCGATGTCACTTTCAGCGCGAGGCTGGCAAGTCACCGGGAG	1	-15.2	No	No	Yes	No
	chiX	phnP	GCATAATAATAAAAAAATGAAATTCCTCTTTGACGGGCCAATAGCGATATTGGCCATTTTTTTA	TTTGATGGGATGGAGATTGGGGTGGCGTGATGAGAGGGAATGTGCGCGCTGGC	1	-29	No	No	No	Yes
	spf	ydjN	GTAGGGTACAGAGGTAAGATGTTCTATCTTTCAGACCTTTTACTTCAC	TCCGGCAATGCTGGCGGTGATGGTTGCGCCTACG	1	-13.3	No	No	Yes	No
	ryeA	yigF	AAGTCAGCGAAGGAAATGCTTCTGGCTTTTAACAGATAAAAAGAGACCGAACACGATTCCTGTATT	TTGCTGTTAACACGAAC	1	-7.2	No	No	No	Yes
	gcvB	bax	TCTGGTGAACTTTTGGCTTACGGTTGTGATGTTGTGTTGTTGTGT	CACACAACAACAGCGAGTCAAAAGTCCCACTTAACTAAA	1	-29.9	No	No	Yes	No
	arrS	wcaN	AAATATCGAGTCTCCTTGTTTCGACTTAAGCTGGCAATTGGATTGCCAGCTTTCTTTT	TTTGTGTGCGCGACCTGCCATTGGTGACAACCCATTTGTCGTGGTACTGCCAGACGTTG	1	-19	No	No	No	Yes
	arrS	rsmH	GTAATCCGATTTAAATATCGAGTCTCCTTGTTTCGACTTAAGCTGGCAATTGGATTGCCAGCTTTCTT	TTTTCCTTTATGCGCGATGGTCCGCTGGACATGCGTATG	1	-16.8	No	No	No	Yes
	gcvB	sstT	CTTCCTGAGCCGGAACGAAAAGTTTTATCGGAATGCGTG	ACAGAACGCACCAGGGATGTGCGACAACACAATGAAAGGATCGAAAAATGACTACGCAACGTTCACCGGGGCTATTCCGGCGTCTGG	1	-23.2	Yes	Yes	No	No
	spf	yhfK	GAGGTAAGATGTTCTATCTTTCAGACCTTTTACTTCACGTAATCGGATTTGGCTGAATATTTTAGCCGCCCCAGTCA	CGATTCGGTCTGCTCTTCTCCCTCGTTCCTGCCTGTTGCAATATTGCGGGCCTTGATACG	1	-19.6	No	No	Yes	No
	arcZ	ybaT	CGGCGCAGCCAAGATTTCCCTGGTGTTG	TGTCGTGGTGTTGATTATGCTGATGACGGCGGCACTGAA	1	-12	No	No	Yes	No
	gcvB	ugpB	CGGTTGTGATGTTGTGTTGTTGTGTTTGCAATTGGTC	GTTCTATAACGGTGATTGCGCGATGACCACCGCCTCTTCC	1	-17.4	No	No	Yes	No
	chiX	ycgM	CCGTCGCTTAAAGTGACGGCATAATAATAAAAAAATGAAATTCCTCTTTGACGGGCCA	TGAAGTCGAACTGGCGGTGTTGATTGGCGCGACACTGCGTCAGGCTACGGAA	1	-24.6	No	No	Yes	No
	chiX	pykF	AAAGTGACGGCATAATAATAAAAAAATGAAATTCCTCTTTGACGGGCCAATAGCGATATTGGCCAT	TCTGCAGAGCGGTCTGGCACACAAAGGTGACGTTGTAGTTATGGTTTCTGGTGCACTGGTACCGAGCGGCACT	1	-24.3	No	No	No	Yes
	cyaR	ychE	CTGAAAAACATAACCCATAAAATGC	GGGATTGTTCCGCATGGCAC	1	-6.9	No	No	No	Yes
	chiX	gadC	GACGGCATAATAATAAAAAAATGAAATTCCTCTTTGACGGGCCAATAGCGATATTGGCCATTTTTTTA	AAATACTCTGGGGCCGAGATGGGGATTTGCAGCGATCTCATTTGGCTATCTGCAAATCGCCATT	1	-22.8	No	No	No	Yes
	arcZ	lpxC	TTCCCTGGTGTTGGCGCAGTATTCGCGCACCCCGGTCTAGCCGGGGTCATTTTTTA	CGTTACGCCCTGCGCCGGCCAACACCGGGGTCA	1	-37.8	Yes	No	Yes	No
	arrS	lsrK	CGATTTAAATATCGAGTCTCCTTGTTTCGACTTAAGCTGGCAATTGGATTGCCAGCTTTCTTT	AAATAGCAGTGGGACAGGCGGAGTGGCGGCATCTGGCAGTACCGGACGTTCCTGGTTCTATGG	1	-21.4	No	No	No	Yes
	spf	gltI	TAGGGTACAGAGGTAAGATGTTCTATCTTTCAGACCTTTTAC	AACTAATTACAAGAACCAGGGGCGGAAATTCCAGCCCTCTCGATTGTTACGTAGCACGGA	2	-14.1	No	Yes	Yes	No
	spf	rmf	TTTTAGCCGCCCCAGTCAGT	AAGGTCACAATGGCTGGGAGGCTGGCGAGAAGCCATGGCGGACAGGGTAGTAATGGCCTGATTCTGTCT	1	-22.5	No	No	No	Yes
	cyaR	yibB	CTGAAAAACATAACCCATAAAATGCT	CTGTCACATCTCAACAAC	1	-1.4	Yes	No	No	Yes
	chiX	bolA	AAAGTGACGGCATAATAATAAAAAAATGAAATTCCTCTTTGACGGGCCAATAGCGATATTGGCCATTTT	CTTTAGCGGAGGAACTCTCTACTACCGTTCATGCGCTGGCTCTGCATACTT	1	-15.5	No	No	Yes	No
	cyaR	treB	CTGAAAAACATAACCCATAAAATG	GTTGATCGGTGAAGCGAT	1	-5.5	No	No	No	Yes
	arrS	ydgD	GTAATCCGATTTAAATATCGAGTCTCCTTGTTTCGACTTAAGCTGGCAATTGGATTGCCAGCTTTCTTTT	GACGTTGCCAGATCGGCAAACGATGAGGTCAGCACCCTGTTTTTT	1	-21.7	No	No	Yes	No
	cyaR	accA	ATAAAATGCTAGCTGTACCAGGAACCACCTCCTTAGCCTGTGTAATC	TCGGTGAAGGTGGTTCTG	2	-19.4	No	Yes	No	No
	ssrS	sucD	GAGTAACCGTGAAGACAAAATTTCTCTGAGATGTTCG	TCGGTCAGTCGACCTGTGTCGGTATCGGCGGTGACCCGATCCCGGGCTCTAACTTTATCGACATTCTCGAAATG	1	-15.7	No	No	Yes	No
	gadY	uhpC	ACAGGGAGTGTTATAACGGTTTATTAGTCTGGAGACGGCAGACTATCCTCTTCCCGGTCCCCTAT	ATTGGTTTTTTTGTCTT	1	-9.5	No	No	No	Yes
	cyaR	envZ	CTGAAAAACATAACCCATAAAATGCTAGCTGTACCAGGAACCACCTCCTTAGCCTGTGTAATCTCCCTTACACGGGCTTATTTTTT	TTCGGAGGTGCGTTCCGTTA	4	-22.4	No	Yes	No	No
	omrA	glsA	ATTCGGTACGCTCTTCGTACCCTGTCTCTTGCACCAACCTGCGCGGATGCGCAGGTTTTTTT	GCGCTCTCTGACGAAGTCAACCAGTCGGAACAA	1	-17.5	No	No	Yes	No
	csrB	dnaA	AGGGAGCAACAAAAGTAGCTGGAATGCTGCGAAACGAACCGGGAGCGCTGTGAATACAGTGCTCC	CGACTTTTGTTCGAGTGGAGTCCGCCGTGTCACTTTCGCTTTGGCAGCAGTGTCTTGCCCGATT	1	-35.5	No	No	Yes	No
	arcZ	ypjA	TTCCCTGGTGTTGGCGCAGTATTCGCGCACCCCGGTCTAGCCGGGGTCATTTT	TTGCAACCACCAGGGCGACGC	2	-18.6	Yes	Yes	No	No
	spf	nusA	TTTTAGCCGCCCCAGTCAGT	CGTAATAAACTGTAGCAGGAAGGAACAGCATGACAGATGTAACG	1	-9.1	No	Yes	No	No
	arrS	fur	GTAATCCGATTTAAATATCGAGTCTCCTTGTTTCGACTTAAGCTGGCAATTGGATTGCCAGCTTTCT	TTTGACGACGCTGGTATCGTCACCCGCCACAATTTTGAAGGCGGTAAATCCG	1	-22.4	No	No	Yes	No
	chiX	ampH	AAGTGACGGCATAATAATAAAAAAATGAAATTCCTCTTTGACGGGCCAATAGCGATATTGGCCATTTTTTT	AGGTTGGGTATATATGGCCCCGAAAGAGGGTCGTCCGGGGATTATTCAGAAGACAGGCGGTGGTG	1	-31.3	No	No	Yes	No
	arrS	gatB	TTAAATATCGAGTCTCCTTGTTTCGACTTAAGCTGGCAATTGGATTGCCAGCTTTCTTTT	AGTTCACGGCATGCCTTTTATTTCT	1	-12.3	No	No	Yes	No
	arrS	mutY	TAATCCGATTTAAATATCGAGTCTCCTTGTTTCGACTTAAGCTGGCAATTGGATTGCCAGCTT	GTTGGCCTAGCGGCTCCCGTGGAGCGTTTGTTACAGCAGTTACGCACTGGCGCGCCGGTTTAGCGCGTGAGT	1	-25.4	No	No	No	Yes
	cyaR	rhtA	TAAAATGCTAGCTGTACCAGGAACCACCTCCTTAGCCTGTGTAATCT	TTCTTGGTCTGTGGTTCCTGCTACCGC	1	-24.1	Yes	Yes	No	No
	arrS	guaD	AATCCGATTTAAATATCGAGTCTCCTTGTTTCGACTTAAGCTGGCAATTGGATTGCCAGCTTTCTTTT	TTTGATTGGCAACTTTTTA	1	-9.1	No	No	No	Yes
	mgrR	pitA	GATTCGTTATCAGTGCAGGAA	ATATGGGATCGTCTCATGGCCTTGCCATGGTGTTCTCTATGTTGCTGGCG	1	-10.3	Yes	No	Yes	No
	gcvB	yjaG	GTGATGTTGTGTTGTTGTGTTTGCAATTGGTCTGCGATTCAGACCATGGTAGCAAAGCTACCTTTTTTCACTTC	AATTTCCGTATTTGAGAACTCAACATGTTACAAAACCCAATTCATCTGCGTCTGGAGCGCCTGG	1	-18.4	No	No	No	Yes
	spf	ftsZ	CGGATTTGGCTGAATATTTTAGCCGCCCCAGTCA	ATTGCGTGCGGCGCTGGAAGGTGCAGACATGGTCTTTATTGCTGCGGGTATGGGTGGTGGTAC	1	-21.7	No	No	No	Yes
	dsrA	ppiA	ACCCCCTCAGGGTCGGGATTTT	TTGTTAAGGAAATCTCATGTTCAAATCGACCCTGGCGGCGATGGC	3	-21.4	No	No	Yes	No
	spf	pgrR	CGTAATCGGATTTGGCTGAATATTTTAGCCGCCCCAGTCA	TAGATAGGCTGAAGTATAAAGGTGCTGTTTAGCACTACTTGCTGATACATTA	1	-20.9	No	No	No	Yes
	omrA	ytfR	GATTATTCGGTACGCTCTTCGTACCCTGTCTCTTGCACCAACCTGCGCGGATGCGCAGGTTTTTTTTC	GGGAGCACGCTTTACACCGGGGGAAACCA	1	-13.3	Yes	No	No	Yes
	chiX	gadX	TGACGGCATAATAATAAAAAAATGAAATTCCTCTT	ACGAGTTTGTACGGTTATCAATAATAATATCGCCCATG	1	-6	No	No	No	Yes
	gcvB	fdoG	GTTGTGTTTGCAATTGGTCTGCGATTCAGACCATGGTAGCAAAGCTACCTTTTTTCACTTCCTGTACATTTACCCTGTCTGTCCATAGTGATTAATGTAGCACCGCCTAATTGCGGTGCTTTTTTTT	ACACGCAGCAAGCGAATGTAAATGGGACGTGACAATGTCGAAACAAGGAGCAATCC	4	-28	No	No	No	Yes
	cyaR	mglA	CTGAAAAACATAACCCATAAAATGC	TGCAGGAAAATCGACATTATTAAAATGCCTGTTTGGTA	1	-2.9	No	No	Yes	No
	sokX	fabR	TTTGGGTTCGAACGCTGGCCTCAGGTTGATAGAAATATCGCCTGGGGCTTTTGTC	TTACTGGTATCGCCGTGAAC	1	-9	No	No	Yes	No
	chiX	putP	AGTGACGGCATAATAATAAAAAAATGAAATTCCTCTTTGACGGGCCAATAGCGATATTGGCCATTTTTTTA	TCTTTGGCATGATATTGATTGGGTTTATCGCCTGGCGATCAACGAAAAACTTTGACGA	1	-20.9	No	No	Yes	No
	cyaR	yhiD	CTGAAAAACATAACCCATAAAATGCTAGCTGTACCAGGAAC	TATCCAGCTTCATGCCACAACGTCGATAGAAGACCTGTTG	1	-8.2	No	No	Yes	No
	ryeA	gatZ	TGGCTTTTAACAGATAAAAAGAGACCGAACACGATTCCTGTATTCGGTCCAGGGAAATGGCTCTTGGG	ATGATGTTTTGCGCGCCTATCGC	1	-7.3	No	No	Yes	No
	dicF	glgA	ACTCCGTGACTGCTCTGCCGCCCTTTTTA	TTATGGGCGGCGCGGAC	1	-21.7	No	No	No	Yes
	arcZ	wecC	TTTCCCTGGTGTTGGCGCAGTATTCGCGCACCCCGGTCTAGCCGGGGTCATTTTTT	CTTCCGCGATGTGAATATCGCTTTTGCTAATGAATTGTCGCTGATTTGTGCCGATCAGGGGATTAACGT	3	-36.9	No	Yes	No	No
	cyaR	yncD	CTGAAAAACATAACCCATAAAATGCT	TGGTCGTGTCGATAATTTATTCGATAAA	1	-6.2	No	No	Yes	No
	arrS	ygdD	GTAATCCGATTTAAATATCGAGTCTCCTTGTTTCGACTTAAGCTGGCAATTGGATTGCCAGCTTTCTTT	ATGCTGATTTTCGCCGCCATTAGCGGCTTCATTT	1	-14.4	No	No	Yes	No
	arcZ	napF	CCAAGATTTCCCTGGTGTTGGCGCAGTATTCGCGCACCCCGGTCTAGCCGGGGTCATTTTTT	TACGCCTGCGCGCAGGCTTGCCCCGAATCGCTATTTTCTCCGCGCCACACCAGGGCCTGGGATTTGCAGTTCACCATCGGGGACGCGTGCCTGGCGTATCAGTC	140	-48.8	Yes	Yes	Yes	Yes
	gadY	iraP	CCGTGCCAACAGGGAGTGTTATAACGGTTTATTAGTCTGGAGACGGCAGACTATCCTCTTCCCGGTCCCCT	ACTTTGGATAAGGAAATACAGACATGAAAAATC	1	-15.8	No	No	No	Yes
	dsrA	uvrD	ACATCAGATTTCCTGGTGTAACGAATTTTTTAAGTGCTTCTTGCT	ATGCGCTTCTTCGAACGCCAGGAAATCAAAGATG	2	-32	No	Yes	No	No
	arcZ	xseA	GGTGTTGGCGCAGTATTCGCGCACCCCGGT	GACGGATGTGACCATTGCCGATTTTGTTGCCGATCTGCGTGCGCCAACGCCGT	3	-35.6	No	No	No	Yes
	spf	speE	TAGGGTACAGAGGTAAGATGTTCTATCTTTCAGAC	CTTTTGCCTTACCTCAGTATCTGCAAG	4	-19.3	No	Yes	No	No
	ryeA	ftsI	AAAGTCAGCGAAGGAAATGCTTCTGGCTTTTAACAGATAAAAAGAGACCGAACAC	ATGCGGCTGTATTCTCCTGGCGCTGGCTTTTCT	1	-26.5	No	No	No	Yes
	gcvB	rodZ	CTTTTGGCTTACGGTTGTGATGTTGTGTTGTTGTGTTTGCAATTGGT	ATACTACCGCAACCAACACGCAAACACCTGCCGTAACTGC	3	-27	No	Yes	No	No
	rybB	rhtC	TTTTCTTTGATGTCCCCATTTTGTGGAGCCCATCAACCCCGCCATTTCGGTTCAAGGTTGATGGGTTTTTTG	TTTGATTATTTCGCGGTGATGCCAGACGCGT	1	-14.9	No	No	Yes	No
	ryeA	mdtF	TAAAAAGAGACCGAACACGATTCCT	TGACTATGTTCGGGATGGTGCTGGCGATAGGGTTACTGGTGGATGACG	1	-13.3	No	No	No	Yes
	micA	cadA	AAAGACGCGCATTTGTTATCATCATCCCTGAATTCAGAGATGAAAT	AACTGATCGAAAACAATGCGCGTCTGTG	2	-25	No	Yes	No	No
	micA	zraR	CTGAATTCAGAGATGAAATTTTGGCCACTC	TCTACTATCGCCTGAAT	1	-8.2	No	No	Yes	No
	gcvB	recA	CGAAAAGTTTTATCGGAATGCGTGTTCTGGTGAACTTTTGGCTTACGG	ATTGACTATCCGGTATTACCCGGCATGACAGGAGTAAAAA	1	-14	Yes	Yes	No	No
	arcZ	cspD	TTCCCTGGTGTTGGCGCAGTATTCGCGCACCCCGGTCTAGCCGGGGTCATTTTTT	TTTGATGTCCACCAGGGG	1	-19.9	Yes	No	No	Yes
	arrS	feaR	GTAATCCGATTTAAATATCGAGTCTCCTTGTTTCGACTTAAGCTGGCAATTGGATTGCCAGCTTTCTTTT	ATGAATAATCCGGCACTTTCTGAAACAGAAAGTGAAGCTGCGCTACAGGCGATGGTGT	1	-22.4	No	No	No	Yes
	glmY	rsmH	ATTCACCGACTTATGTCAGCCCCTTCGGGACGTGC	TTAAACATCCCGCGACC	1	-9.5	No	No	No	Yes
	gcvB	oppA	CTTCCTGAGCCGGAACGAAAAGTTTTATCGGAATGCGTGTTCTGGTGAACTTTTGGCTTACGGTTGTGATGTTGTGTTGTTGTGTTTGCAATTGGTCTGCGATTCAGACCATGGTAGCAAAGCTACCTTTTTTCACTTCCTGTACAT	CACATGCTGGTTAATACCAGTAATTATAATGAGGGAGTCCAAAAAACAATGACCAACATCACCAAGAGAAGT	40	-37.8	Yes	Yes	Yes	Yes
	ryeA	dam	ATTCCTGTATTCGGTCCAGGGAAATGGCTCTTGGG	ATGTCTGGTTGAGCCTTTTGTAGGTGCCGGGTCGGTGTTTCTCAACACCGACTTTTCTCG	1	-23.9	No	No	No	Yes
	dicF	ybiT	TGGTGACGTTTGGCGGTATCAGTT	ACGCCTGTGTTAGTTTCCAGTAACGTCACCATGCAG	3	-19.7	No	No	No	Yes
	omrA	atpB	CGGTACGCTCTTCGTACCCTGTCTCTTGCACCAACCTGCGCGGATGCGCAGGTTTTTTTTC	CGTCTATCTGTCGATGGCGTCTGAAGAACATTAATTTACCAACA	1	-17.5	No	No	Yes	No
	arrS	nhaA	GTAATCCGATTTAAATATCGAGTCTCCTTGTTTCGACTTAAGCTGGCAATTGGATTGCCAGCTTTCTTTTA	GTTTGCGTCCATCAGTTTGACAGGACGG	1	-18.5	No	No	Yes	No
	cyaR	pck	CTGAAAAACATAACCCATAAAATGCTAGCTGTACCAGGAACCACC	TTGGCGGCACCTGGTACGGCGGCGAAATG	8	-29.7	No	No	Yes	No
	chiX	tesB	CGGCATAATAATAAAAAAATGAAATTCCTCTTTGACGGGCCAATAGCGATATTGGCCATTTTTTTA	CTGGAAAAAATTGAGGAAGGACTCTTTCGCGGCCAGAGTGAAGATTTAGGTTTACGCCAGGTG	1	-23.9	No	No	Yes	No
	chiX	add	AAAGTGACGGCATAATAATAAAAAAATGAAATTCCTCTTTGACGGGCCAATAGCGATATTGGCCATTTTTTTA	TGTCAGCAAGAGCTGGAGGCCTTTTTAGCCCAC	1	-19.2	No	No	Yes	No
	arcZ	ycgB	ATTCGCGCACCCCGGTCTA	AACAATGAGGTGCGCGT	1	-17	No	No	No	Yes
	gcvB	narP	AAAAGTTTTATCGGAATGCGTGTTCTGGTGAACTTTTGGCTTACGGTTGTGATGTT	TTTCAGGTGATGATTGTGGATGATCATCCACTTATGCGACGCGGTGTTCGTCAGTTACTGGAGCTTGATCCTG	1	-23.6	No	No	Yes	No
	micA	dmlR	AAAGACGCGCATTTGTTATCATCATCCCTGAATTCAGAGATGAAATT	TGATTTGCGCGTCTTTATGCT	2	-18.6	Yes	No	Yes	No
	cyaR	dsbB	GAAAAACATAACCCATAAAAT	GGAAATGCCGCAGTGGCTGCTCGGTATTTT	1	-3.9	No	Yes	No	No
	spf	dps	AAGATGTTCTATCTTTCAGACCTTTTACTTCACGTAATCGGATTTGGCTGAATATTTTAGCCGCCCCAGTCAGT	TATTGATCTTTCTTTGATT	1	-5.4	Yes	No	No	Yes
	cyaR	actP	AAATGCTAGCTGTACCAGGAACCACCTCCTTA	ACATTGCGGTGGTGCTGGTCGGCGTG	3	-25.1	No	No	No	Yes
	spf	chiP	TAATCGGATTTGGCTGAATATTTTAGCCGCCCCAGTCAGT	GCGAAAAAGCGGTCTTCTTCGGTGCGATGTATGACC	1	-13.9	No	Yes	No	No
	spf	aceK	TTTGGCTGAATATTTTAGCCGCCCCAGTCAGT	TTTGGCTTTGCGCGTTCTTATTTTATGGTT	1	-11.1	No	No	No	Yes
	arcZ	astC	TTCCCTGGTGTTGGCGCAGTATTCGCGCACCCCGGTCTA	ATTTTTGATGAAGTACAAACCGGCGTCGGGCGCACCGGGGAACTG	8	-31.1	Yes	No	Yes	Yes
	arcZ	mqsA	TTTCCCTGGTGTTGGCGCAGTATTCGCGCACCCCGGTCTA	TTTATCTTAAAATTACGGTAATTCATGACGTACTGATCGTCTCGTTTAAGGAGAAGTAATATGAAATGTCCGGTTTGCCACCAGGGAGAAATGG	12	-28.1	Yes	Yes	Yes	Yes
	arrS	apbE	GTAATCCGATTTAAATATCGAGTCTCCTTGTTTCGACTTAAGCTGGCAATTGGATTGCCAGC	GGATTTCCCGCTATCTGG	1	-9.5	No	No	No	Yes
	cyaR	rpoB	GCTGTACCAGGAACCACCTCCTTAGCCTGTGTAATCTCCCTTACACGGGCTTATTTTT	TACCGTGGTTCCTGGCTGG	11	-22	No	Yes	Yes	No
	cyaR	yegP	CTGAAAAACATAACCCATAAAATGCTAGCTGTACCA	CCAATGGCACAAGCCAGACGGTGAAAGACA	1	-8.5	No	No	Yes	No
	omrB	rcnB	ATCCCAGAGGTATTGATAGGTGAAGTCAACTTCGGGTTGAGC	AGCCACCGCGGGTTCGACCAATACCTCGGGAATTTCT	32	-29.4	Yes	Yes	Yes	Yes
	chiX	dam	AAAGTGACGGCATAATAATAAAAAAATGAAATTCCTCTTTGACGGGCCAATAGCGATATTGGCCATTTTTTT	AAGGGCGAATGTCTGGTTGAGCCTTTTGTAGGTGCCGGGTCGGTGTTTCTCAACACCGACTTTTCTCGT	2	-30.5	No	Yes	No	Yes
	chiX	yaiI	ACGGCATAATAATAAAAAAATGAAATTCCTCTTTGACGGGCCAATAGCGATA	CTAAATGTAATTTATTA	1	-2.7	No	No	No	Yes
	arrS	mocA	GTAATCCGATTTAAATATCGAGTCTCCTTGTTTCGACTTAAGCTGGCAATTGGATTGCCAGCTTT	CGGCCATCCGATTTTAGTGTC	1	-18.8	No	No	Yes	No
	arrS	tufA	GTAATCCGATTTAAATATCGAGTCTCCTTGTTTCGACTTAAGCTGGCAATTGGATTGCCAGCTT	TACCGTCCGCAGTTCTACTTCCGTACTACTGACGTGACTGGTACCATCGAACTGCCGGAAGGCGTAGAGATGGT	1	-26.5	No	No	Yes	No
	spf	gadB	TAGGGTACAGAGGTAAGATGTTCTATCTTTCAGACCTTTTACTTCAC	CAAGCGTATGGAAGCTGCAGGCAAACCAACG	1	-10.9	No	No	Yes	No
	ryhB	ahpC	TATTACTTAGCCAGCCGGGTG	ACCCGGCTGACTTTACTT	2	-19.8	No	Yes	No	No
	mgrR	aroA	GATTCGTTATCAGTGCAGGAAAATGCCTGTTAGCG	TGCTGGCGGCATTAGCACACGGCAAAACAGTATTAACCAATCTGCTGGATAGCGATGACGTGCGCCATATGCTG	1	-28.5	No	No	No	Yes
	chiX	yhbE	AAGTGACGGCATAATAATAAAAAAATGAAATTCCTCTTTGACGGGCCAATAGCGATATTGGCCATTTTTTTA	GATTTCTTCGCCAGACCGA	1	-7.8	No	No	No	Yes
	cyaR	aspS	CTGAAAAACATAACCCATAAAATGCT	ATTGTGGACAGCTCCGTTTGTCCCACGTG	1	-6.4	No	No	Yes	No
	spf	nagE	TTTAGCCGCCCCAGTCAG	AGCTCCCTATCGCGGTGCTGCCGGTGGCGGCACTGTTG	1	-19.5	Yes	No	No	Yes
	spf	nfo	TTTACTTCACGTAATCGGATTTGGCTGAATATTTTAGCCGCCCCAGTCA	ATTGGAGCGCACGTTAGTGC	1	-11	No	No	No	Yes
	spf	ycdY	TCGGATTTGGCTGAATATTTTAGCCGCCCCAGTCAGTA	TTGTTTATCGGCGATGAATGTGCTGTGCCGCCATATCGTAGCGCATGGGTTGAGGGCGCGACGGA	1	-16.4	No	No	Yes	No
	chiX	mreC	AAAAATGAAATTCCTCTTTGACGGGCCAATAGCGATATTGGCCATTTTTTT	AATTTTTAGCCGTGGCCCGTCGCTAC	1	-23.1	No	Yes	Yes	Yes
	chiX	rbsD	AAAGTGACGGCATAATAATAAAAAAATGAAATTCCTCTTTGACGGGCCAATAGCGATATTGGCCATTTTTTT	AATCCGCAACTCCACGAAACGTTGCTCACTCACCTTGAGCAGCTGCAAAAACACCAGGGAAATAC	2	-11.7	No	Yes	Yes	No
	arrS	osmF	GTAATCCGATTTAAATATCGAGTCTCCTTGTTTCGACTTAAGCTGGCAATTGGATTGCCAGCTTTCTT	CTCTGGGCAGGTTCACTGGTTATGTTGGCAGCCGTGAGCCTGCCGCTAC	1	-23.7	No	No	No	Yes
	ryhB	gmr	ATTGCTCACATTGCTTCCAGTATTACTTAGCCAGCCGGGTGCTGGCTTTTTT	TCACAAAGCGCGCTGGAAGCAATG	1	-25.4	No	Yes	No	No
	arcZ	sufE	TTTCCCTGGTGTTGGCGCAGTATTCGCGCACCCCGGTCT	GTAATTTTTTACGCTGCGCCAACTGGGA	3	-25.5	No	No	No	Yes
	arrS	gatY	GTAATCCGATTTAAATATCGAGTCTCCTTGTTTCGACTTAAGCTGGCAATTGGATTGCCAGC	GCGCACCGGCGCTTGATTTTTCTAGACTGGAGAACATTCGCCAGTGGGTGAACTTACCGCTGGTGCTGCAT	1	-22.6	No	No	No	Yes
	chiX	tdcG	AAGTGACGGCATAATAATAAAAAAATGAAATTCCTCTTTGA	GATAAATACCGCGAAACATCACGCGGAGGACTGGCCAT	1	-10.6	No	Yes	No	No
	mgrR	pqiC	GATTCGTTATCAGTGCAGGAAAATGCCTGTTAGCGT	AAGTGCTGGCCGGTGTCTGGAGTCA	1	-17	Yes	Yes	No	No
	arrS	mltD	GTAATCCGATTTAAATATCGAGTCTCCTTGTTTCGACTTAAGCTGGCAATTGGATTGC	GAAAGCCGTGCTCTGGCGCGTGTGCACCTGAGCAGCCCGGTTGAAATGGCGAAGGTAGCAGATATGGC	1	-26.6	No	No	No	Yes
	gcvB	yncL	AAAGCTACCTTTTTTCACTTCCTGTA	ATAAAAGGTGGCAAAAATGA	1	-14.2	No	Yes	No	No
	chiX	gdhA	AAGTGACGGCATAATAATAAAAAAATGAAATTCCTCTTTGACGGGCCAATAGCGATATTGGCCATTTTTTTA	TTTTCTTGAACAAAATCCAAAATATC	1	-4.8	No	No	No	Yes
	gadY	gfcD	TTAGTCTGGAGACGGCAGACTATCCTCTTCCCGGTCCCCTAT	AAGCTGCCTGGCCATTGCCGTCTCCAGTGCC	3	-27.5	No	No	Yes	No
	arcZ	nfrA	TTCCCTGGTGTTGGCGCAGTATTCGCGCACCCCGGTCTAGCCGGGGTCATTTTTTA	AATAATGTCGGCGGCGCAGCGCCAGGGAAAAGC	6	-34.6	Yes	No	Yes	Yes
	chiX	ybjL	AAGTGACGGCATAATAATAAAAAAATGAAATTCCTCTTTGACGGGCCAATAGCGATATTGGCCATTTTTTTA	GGTGCATTAAGCATGGTGAAAGAGTTCGGCTTGATGGTGTTTATGGCAGGCGTTG	1	-21.2	No	No	No	Yes
	gadY	gltI	TGCCAACAGGGAGTGTTATAACGGTTTATTAGTCTGGAGACGG	CACTGAACTAATTACAAGAACCAGGGGCGG	1	-11.9	No	No	Yes	No
	chiX	oppA	AAAGTGACGGCATAATAATAAAAAAATGAAATTCCTCTTTGACGGGCCAATAGCGATATTGGCCATTTTTTTA	CACACATTAGAAGTCACCTTAAGTGAACCCGTTCCGTA	1	-13.1	No	No	No	Yes
	arcZ	oppC	TTCCCTGGTGTTGGCGCAGTATTCGCGC	GCGTTATTTGTAATCCTGGCACCGATGCTTTCCCAGTTTGCCTATGACGATACTGACTGGGCGATGATGT	1	-17.2	No	No	Yes	No
	cyaR	ygaM	CTGAAAAACATAACCCATAAAATGCTAGCTGTACCAGGAACCA	AACCAGGGCGCGAATGCATGGTCGT	5	-10.7	No	No	Yes	No
	spf	yicO	GGGTACAGAGGTAAGATGTTCTATCTTTCAGACCTTTTACTTCACGTAATCGGATTTGGCTGAATATTTTAGCCGCCCCAGTCAGTAAT	CAATGGACAAAAAAATGAATAATGACAATACCGATTACGTGAGTAATGAAT	25	-25.7	No	Yes	Yes	No
	arrS	rmf	GTAATCCGATTTAAATATCGAGTCTCCTTGTTTCGACTTAAGCTGGCAATTGGATTGCCAGCTTTCTTTT	TCAGACGCTGAATCAAAGGTCACAATGGCTGGGAGGCTGGCGAGAAGCCATGGCGGACAGGGTAGTAATGGCCTGATTCTGTCTCTTTAAAAAGAAACCTCCGCATTGCGGAGGTTTCGC	4	-37.1	No	No	Yes	Yes
	rybB	paaX	CCGCCATTTCGGTTCAAGGTTGATGGGTTTTTTG	TTTGCATGAAGCGGGTGTGGCGGATAACGTGATTTGTTTTGAAGCGC	1	-21.4	No	No	Yes	No
	spf	aceK	TAGGGTACAGAGGTAAGATGTTCTATCTTTCAGACCTTTTACTTCACGTAATCGGATTTGGCTGAATATTTTAGCCGCCCCAGTCAGT	TTTAACTCCGTGTACTGTCGGTTATTTGACCACCGCTCGCTTACTCCCGAGCGGCTTTTTAT	2	-20.2	No	Yes	No	Yes
	omrA	msyB	CCTGTCTCTTGCACCAACCTGCGCGGATGCGCAGGTTTTTTTT	TTACATGAATGGGACGAGGGGGAATTTCAGCTTGAGCCACCGCTGG	1	-16.6	No	No	No	Yes
	chiX	emtA	AAGTGACGGCATAATAATAAAAAAATGAAATTCCTCTTTGACGGGCCAA	AAGTTCCGGTGCAACGTGCGATGCAGTGGATGCCAATAAGCCAGAAAGCCGGTGCAGCCTGGG	1	-16.5	No	No	No	Yes
	chiX	miaA	GCATAATAATAAAAAAATGAAATTCCTCTTTGACGGGCCAATAGCGATATTGGCCATTTTTTT	TTTGAAGCAGAAGTCCGGGCGCTTTTTGCCCGAGGAGATTTGCATACGGACTTGCCTTCCATTCGTTGCG	1	-24.1	No	No	No	Yes
	arrS	yeiB	CCGATTTAAATATCGAGTCTCCTTGTTTCGACTTAAGCTGGCAATTGGATTGCCAGCTTTCTTTTA	TTGATCTCATCGGCCAGGTGAAATTCCTCACGCTTTTTGCGCTACTGTTTGGTGCGGGCCTG	1	-20.6	No	No	No	Yes
	arrS	gltB	TCCGATTTAAATATCGAGTCTCCTTGTTTCGACTTAAGCTGGCAATTGGATTGCCAGCTTTCTTTT	TGTGGGCTGGCGTGATGTCC	1	-17.2	No	No	No	Yes
	arrS	bcsA	TTGTTTCGACTTAAGCTGGCAATTGGATTGCCAGCTTTCTTTTAA	ATATCTTTGTCCCGACTT	1	-5.5	No	No	No	Yes
	ffs	gadC	GTTCTCCCGCAACGCTACTCTGTTTACCAGGTCAGGTCCGGAAGGAAGCA	CAACATGTCCTTCCTGATCGCACTGGCGCTGACG	1	-23.9	No	No	No	Yes
	chiX	rpsU	ATATTGGCCATTTTTTTA	TAAAGTACGTGAAAACGAGCCGTTCGACGTAGCTCTGCGT	1	-6.4	No	No	No	Yes
	micA	arcA	GACGCGCATTTGTTATCATCATCCCTGAATTCAGAGATGAAATTTTGGCCACTCACGAGTGGCCTTTTTC	GTTTCGATTTAGTTGGCAATTTAGGTAGCAAACATGCAGACC	1	-18.1	No	No	No	Yes
	ffs	polB	TACTCTGTTTACCAGGTCAGGTCCGGAAGGAAGCAGCCAAGGCAGATGACGCGTGTGCCGGGATGTAGCTG	TTTCTCTTCATTCTCGCTGGAAACTGTCGCTCAGGAGCTATTAGGCGAAGGA	1	-22.6	No	No	No	Yes
	arrS	tsgA	TGTAATCCGATTTAAATATCGAGTCTCCTTGTTTCGACTTAAGCTGGCAATTGGATTGCCAGCTT	ACTGTTTCTCTCTGTTGCG	1	-9.1	No	No	No	Yes
	arcZ	ybeD	TTCCCTGGTGTTGGCGCAGTATTCGCGCACCCCGGTCT	TGGTTGATCAGGTGGTTGAAGTGGTACAGCGCCATGCGCCAGGTGAC	2	-42.7	Yes	No	No	Yes
	gcvB	fdoG	CACTTCCTGAGCCGGAACGAAAAGTTT	CCCCTATTCGTTCCGGTACT	1	-20.3	No	No	Yes	No
	cyaR	yfiH	ATAAAATGCTAGCTGTACCAGGAACCACCTCCTTAGCCTGTGTAATCTC	AGTGGGGGGGGAGGTTCGCGAGGCGTTTATGGCAGTAG	2	-27.9	No	No	Yes	No
	arrS	rplL	GTAATCCGATTTAAATATCGAGTCTCCTTGTTTCGACTTAAGCTGGCAATTGGATTGCCAGCTTTCTTT	AGCACTGAAAAAAGCTCTGGAAGAAGCTGGCGCTGAAGTTGAAGTTAAATAAGCCAACCCTTCCGGTTGCAGCCTGAGAAATCAGGCTGATGGCTGGTGACTTTTTAGTCACCAGCCTTTTTG	2	-42.2	No	No	Yes	No
	cyaR	slt	GCTGAAAAACATAACCCATAAAATGCTAGCTGTACCAGGAACCACCTCCTTAGCCTGTGTAATCTCC	TTATGCCTGGTACAGCGACCCATACGGTGAAGATGTTCTCTATTCCCGGTTATAGCAGTCCTGGGCA	8	-29.8	No	No	Yes	No
	gcvB	ydcS	TTTGCAATTGGTCTGCGATTCAGACCATGGTAGC	AAACTGATAAACAATACG	1	-3.9	No	No	No	Yes
	ffs	yjjU	GACGCGTGTGCCGGGATGT	TTCGATCTTTATCTCGGCACATCTGCC	1	-22.2	No	No	No	Yes
	ryeA	aceK	GGTTTTCCAGTTTGCGTGCAAAATGGTCAATAAAAAGCGTGGTGGTCATCAGCTGAAATGTTAAAAACCGCCCGTTCTGGTG	TTTTTTAACTCCGTGTACTGTCGGTTATTTGACCACCGCTCGCTTA	5	-29.8	No	No	Yes	Yes
	sroH	dxs	AATTCTCTGGCGAAACCCACCTTAAGGTGGGTTTTG	ATTCAAAAATCTTTGGCGACTGGTTGTGCGAA	1	-12	No	No	No	Yes
	chiX	yjhB	AAAGTGACGGCATAATAATAAAAAAATGAAATTCCTCTTTGACGGGCCAATAGCGATATTGGC	ACGGATATTCAGGCTACTTTAATAGGGACAGTGGCCTTCATAGCCAGACCTATTGGAGGTGGTTTTTTTGG	1	-22.9	No	No	No	Yes
	arrS	yeeA	TAATCCGATTTAAATATCGAGTCTCCTTGTTTCGACTTAAGCTGGCAATTGGATTGCCAGCTTTCTTT	TTGCTATCGAATCTGATT	1	-8.8	No	No	Yes	No
	mgrR	rplU	AAATGCCTGTTAGCGTAAAAGCAAAACAC	TTTCCAAAGTGGTGGTAAAC	1	-4.3	No	No	Yes	No
	chiX	murC	ACGGCATAATAATAAAAAAATGAAATTCCTCTTTGACGGGCCAATAGCGATATTGGCCATTTTTTTA	TTGATTTCCTCGGTGAATTCC	1	-6.5	No	No	No	Yes
	gcvB	nudL	TGTGATGTTGTGTTGTTGTGTT	GTTGCTGACTCAGCGTT	1	-8.8	No	No	No	Yes
	chiX	raiA	ATAAAAAAATGAAATTCCTCTTTGACGGGCCAATAGCGATATTGGCCATTTTTTT	CAAGCTGGAACGGCAGCTCAATAAACTGCAGCACAAAGGCGAAGCACGTCGTGCCGCAA	1	-14.5	No	No	Yes	No
	gadY	yciQ	TTCCCGTGCCAACAGGGAGTGTTATAACGGTTTATTAGTCTGGAGACGGCAGACTATCCTCTT	TGGTGCTGGCGGCGGCGCGGGTGGCGGAGGCGGTGGTGGCTGGTAAT	1	-23.3	No	No	No	Yes
	chiX	ftsP	ACACCGTCGCTTAAAGTGACGGCATAATAATAAAAAAATGAAATTCCTCTTTGACGGGCCAATAG	TTTTACATGGAGCAAATATGTCACTCAGTCGGCGTCAGTTCATTCAGGCATCGGGGATTGCACTTTG	1	-18.4	No	No	Yes	No
	omrA	clpB	TATTCGGTACGCTCTTCGTACCCTGTCTCTTGCACCAACCTGCGCGGATGCGCAGGTTTTTTT	TACATTGCTGACCGTCAGCTGCCGGATAAAGCCATCGACCTGATCGATGAAGCAGCATCCAGCATT	1	-28.1	No	No	Yes	No
	arcZ	yciW	TTTCCCTGGTGTTGGCGCAGTATTCGCGCACCCCGGTCTAGCCGGGGTCATTTTT	ACTACTATTCGGCGCGACTTACGCCGCTCCCCGGGCCTGATTCCACCAGGGAAAGTAA	18	-39	No	No	Yes	Yes
	gcvB	ysgA	CTTCCTGAGCCGGAACGAAAAGTTTTATCGGAATGCGTGTTCTGGTGAACTTTTGGCTTACGGTTGTGATGTTGTGTTGTTGTGTTTGCAATTGGTCTGCGATTCAGACCATGGTAGCAAAGCTACCTTTTTTCACTTCCTGTACATTTACCCTGTCTGTCCAT	GCAACATTTTTATAAGGGTACGGAGAATACCATGGCAACAACACAACAATCTGGAT	15	-36.4	Yes	Yes	Yes	No
	chiX	dld	AATTCCTCTTTGACGGGCCAATAGCGATATTGGCCATTTTT	ACAAGGAGTGGAAAATGTCTTCCATGACAACAACTGATAATAAAGCCT	1	-14.6	No	Yes	No	No
	gcvB	fadE	ACGGTTGTGATGTTGTGTTGTTGTGTTTGCAATTGGTCTGCGATTC	ATTCTCGCTACGGTTGT	1	-11.3	No	No	Yes	No
	gcvB	dam	ACGGTTGTGATGTTGTGTTGTTGTGTTTGCA	CCCAAGGGCGAATGTCTGGTTGAGCCTTTTGTAGGTGCCGGGTCGGTGTTTCTCAAC	1	-12.3	No	No	Yes	No
	cyaR	gltI	GCTGAAAAACATAACCCATAAAATGCTAGCTG	ACTAATTACAAGAACCAGGGGCGGAAATTCCAGCCCTCTCGATTGTTACGTAGCACGGA	10	-10.1	No	Yes	Yes	Yes
	chiX	nuoE	AAAGTGACGGCATAATAATAAAAAAATGAAATTCCTCTTTGACGGGCCAATAGCGATATTGGCCATTTTTT	ACTCACGCGCATCTGACCCCGGAAGCGATCCCTGAACTGCTGGAGCGGTATAAATGAAAAACATT	1	-16.9	No	No	Yes	No
	ryeA	ucpA	TGACTATAAAGTCAGCGAAGGAAATGCTTCTGGCTTTTAACAGATAAAAAGAGACCGAACAC	ACTGATTACGGGCGCATTGCAGGGAATTGGCGAAGGAATTGCCAG	1	-15.7	No	No	Yes	No
	arcZ	tnaA	TTTCCCTGGTGTTGGCGCAGTATTC	ACACCATTCCGACTCACCAGGGCCGTGGCGCAGAGCA	20	-18.1	Yes	No	Yes	Yes
	chiX	yebF	GACGGCATAATAATAAAAAAATGAAATTCCTCTTTGACGGGCCAAT	TGAATCATTGTGCTATGGAGAAAAACATGAAAAAAAGAGGGGCGT	1	-12.6	No	No	Yes	No
	oxyS	clpA	AGAAACGGAGCGGCACCTCTTTTAACCCTTGAAG	TTGGGGGAGGTGCCTATGCTC	1	-24.9	No	No	Yes	No
	mgrR	cpxP	AAAATGCCTGTTAGCGTA	AACATCAACAACGAATGGAGCA	1	-6.6	No	No	Yes	No
	omrB	dam	AGAGGTATTGATAGGTGAAGTC	AAGGGCGAATGTCTGGTTGAGCCTTTTGTAGGTGCCGGGTCGGTGTTTCTCAACACCGACTTTTCTCGT	1	-12.1	No	No	Yes	No
	arrS	yniB	TAATCCGATTTAAATATCGAGTCTCCTTGTTTCGACTTAAGCTGGCAATTGGATTGCCAGCTT	TATTGCTGCAGGTTATGTGTTCTTTTCTCTGCTTGGGTTTATTTAATCAAAAGGCCGCACGGAGCGGCCAT	1	-23.7	No	No	No	Yes
	chiX	pmbA	AAGTGACGGCATAATAATAAAAAAATGAAATTCCTCTTTGACGGGCCAATAGCGATATTGGCCATTTTTTTA	GATGCTCAAAGAGATGGGCACCGGGCTGGTGGTGACGGAA	1	-24.9	No	No	Yes	No
	arrS	fes	GTAATCCGATTTAAATATCGAGTCTCCTTGTTTCGACTTAAGCTGGCAATTGGATTGCCAGCTTTCTTTT	AATCGACCTCTGGCAACCACTTTTCCATGACAGGAGTTGA	1	-23.7	No	No	No	Yes
	gcvB	fimA	CGGTTGTGATGTTGTGTTGTTGTGTTTGCAATTGGTCTGCGATTCAGACCATGGTAGCAAAGCTACCTTTTTTCAC	ATCGTTGTTCTGTCGGCTCTGTCCC	1	-11.4	No	No	No	Yes
	ryeA	ybaP	GCGAAGGAAATGCTTCTGGCTTTTAACAGATAAAAAGAGACCGAACACGATTCCTGTATTCGGTC	ATGGAGAAGGGAATTTGCCGCAAATGTTGCGCTAAAAAAATGGCCAATATCGCTATTGGCCCGTCAAAGA	1	-19.8	No	No	Yes	No
	ryeA	chiP	GCGAAGGAAATGCTTCTGGCTTTTAACAGATAAAAAGAGACCGAACACGATT	TTTTTTCGCTGTTCACCTTTGGTGCAGCAATTTATACGTCAAAGAGGATTAACCCATGCGTACGTTTAGTGG	1	-17	No	No	Yes	No
	sdsR	malM	AAAGGGCAAGGCAACTAAGCCTGCATTAATGCCAACTTTTAGCGCACGGCTCTCTCCCA	ATCAGCAGTGTAAAAGGCAAGGGGTAATTACGCCCCACAGTGCTGATTTTGCAACAACTGGTGCGTCTCCTGGCGCACCTTTTTTT	1	-29	No	No	No	Yes
	arrS	hemC	GTAATCCGATTTAAATATCGAGTCTCCTTGTTTCGACTTAAGCTGGCAATTGGATTGCCAGCTTTCTTTTA	AATGGGGATTTCGCTGGCAGAAGAGCTACT	1	-17.9	No	No	No	Yes
	mgrR	pitA	AAATCTATCCATGCAAGCATTCACCGCCGGTT	TTGCATACCGGGCTGTTATTATTGCTTGCACTGG	2	-22.3	Yes	Yes	No	No
	arcZ	rfbA	TTCCCTGGTGTTGGCGCAGTATTCGCGCACCCCGGTCTA	AATTGAAGAGCGCCAGGGATTGAAG	5	-22.7	Yes	Yes	No	No
	chiX	ilvL	AAAGTGACGGCATAATAATAAAAAAATGAAATTCCTCTTTGACGGGCCAATAGCGATATTGGCCATTTTTTT	TTCCTTCGAACAAGATGCAAGAAAAGACAAAATGACAGCCCTTCTA	2	-9.7	No	No	Yes	No
	omrA	ychJ	ATTCGGTACGCTCTTCGTACCCTGTCTCTTGCACCAACCTGCGCGGATGCGCAGGTTTTTTTTC	AGTTTGGTCGCAACGATCCCTGCCCTTGTGGTTCAGGTAAAAAATTTAAAAAGTGCTGCGG	1	-23.5	No	No	Yes	No
	arrS	prlC	GTAATCCGATTTAAATATCGAGTCTCCTTGTTTCGACTTAAGCTGGCAATTGGATTGCCAGCTTTCTTTT	TACGGCATTAAGGGCTGATCATTCAGTGAAAATCTGCTTAATTGATGAAACAGGCACCGGAGAC	1	-31.6	No	No	No	Yes
	arrS	aceK	TAATCCGATTTAAATATCGAGTCTCCTTGTTTCGACTTAAGCTGGCAATTGGATTGCCAGCTTTCTTTT	GAGAGCTTTTTTAACTCCGTGTACTGTCGGTTATTTGACCACCGCTCGCTTACTCCCGAGCGGCTTTTTAT	2	-24.8	No	No	Yes	Yes
	chiX	cbpA	AAAGTGACGGCATAATAATAAAAAAATGAAATTCCTCTTTGACGGGCCAATAGCGATATTGGCCATTTTTTTA	TACTGAAAATCGTGATGCCGCCGA	1	-10.2	No	No	No	Yes
	cyaR	efp	AAAACATAACCCATAAAATGC	ACTATAGCAACGATTTTCGT	1	-1.9	No	Yes	No	No
	omrA	yciQ	CGTACCCTGTCTCTTGCACCAACCTGCGCGGATGCGCAGGT	CTGGCCGTTTGAAATTTATAAGACCCGT	1	-9.1	No	No	No	Yes
	gcvB	hupB	ATGTTGTGTTGTTGTGTTTGCAATTGGTCTGCGA	AAGCACTGAAAGACGCGGTAAACTAAGCGTTGTCCCCAG	1	-13.5	No	No	No	Yes
	cyaR	dusC	TGTACCAGGAACCACCTCCTTAGCCTGTGT	GTGGCCGGAGGTGGTTGCTTTG	3	-26.9	Yes	Yes	No	No
	ryeA	lptD	ACAGATAAAAAGAGACCGAACACGATTCCTGTATTCGGTCCAGGGAAATGGCTCTTGGG	TAGACGTTAATTACTACCA	1	-6	No	No	No	Yes
	dsrA	phoQ	GTGTAACGAATTTTTTAAGTGCTTCTTGCTTAAGCAAGTTTCATCCCGACCCCCTCAGGGTCGGGATTTTTTT	TATCTGTTCGAATTGCGCTGATGAAAAAATTACTGCGTCTT	1	-12.1	No	No	Yes	No
	omrB	sdhD	GTATTGATAGGTGAAGTCAACTTCGG	TACGTGATTTATGGATTCGTTGTGGTGTGGGGTGTGTGA	1	-6.1	No	No	No	Yes
	gcvB	gadX	CTTCCTGAGCCGGAACGAAAAGTTTTATCGGAATGCGTGTTCTGGTGAACTTTTGGCTTACGGTTGT	TATGCAGAAATGCTACGTAAAAGAGCATTAATCTTTGCGTTGTTATCTGTTTTTCTTGAGGATGAGC	1	-19.8	No	No	Yes	No
	arcZ	kefB	TTCCCTGGTGTTGGCGCAGTATTCGCGCACCCCGGTCTAGCCGGGGTCATTTTTT	AAATTTCTCGCGCCAGGGAAGCCC	12	-20.7	Yes	Yes	Yes	Yes
	gadY	oppA	ACAGGGAGTGTTATAACGGTTTATTAGTCTGGAGACGGC	GCTATTGATGATCACACATTAGAAGTCACCTTAAGTGAACCCGT	1	-12.5	No	No	No	Yes
	omrA	gadX	ATTATTCGGTACGCTCTTCGTACCCTGTCTCTTGCACCAACCTGCGCGGATGCGCAGGTTTTTTTTC	TTTGCGTTGTTATCTGTTTTTCTTGAGGATGAGCACTTTATACCGCTGCTTCTG	1	-20.4	No	No	Yes	No
	gadY	yigL	ACAGGGAGTGTTATAACGGTTTATTAGTCTGGAGACG	TTTTGCTCATAACCTGGATCGCGACA	1	-9.4	No	No	No	Yes
	chiX	gatZ	AAGTGACGGCATAATAATAAAAAAATGAAATTCCTCTTTGACGGGCCAATAGCGATATTGGCCATTTTTTT	ATTTATGATGTTTTGCGCGCCTATCG	1	-10.3	No	No	Yes	No
	chiX	tolC	ATAATAATAAAAAAATGA	AGTAACCCGGAATTGCGTAAGTCTGCCGCCGATCGTGATGCTGCCTTTGAAAAAATTAATGA	1	-1.5	No	No	No	Yes
	ryeA	mraZ	ACAGATAAAAAGAGACCGAACACGATTCCTGTATTCGGTCCAGGGAAATGGCTCTTGGG	GTGGGAAATTGTGGGGCAAAGTGGGAATAAGGGGTGAGGCTGGCA	1	-20.6	No	No	No	Yes
	omrB	garP	TATTGATAGGTGAAGTC	ATTTCTCGCTGGCGCTCTTTTCGCCGCTGCTTGGCTGGCTGACTTTCGCCTGGGGCTGGGAGCACGTCTTTA	1	-12.5	No	No	Yes	No
	chiX	rep	AAAGTGACGGCATAATAATAAAAAAATGAAATTCCTCTTTGACGGGCCAATAGCGATATTGGCCATTTTTTTA	TTGCGGCGGTGACCTTTACTAA	1	-9.7	No	No	Yes	No
	cyaR	cspE	CGCTGAAAAACATAACCCATAAAATGCTAG	AGGTAATTTTGATGTCTAAGATTAAAGGTAACGTTAAGTGGTTTAATG	3	-6.4	No	No	Yes	Yes
	omrB	nuoN	CCCAGAGGTATTGATAGGTGAAGTCAACTTCGGGTT	AACGCGGCGCTGGTTTCGCTCTGGTTTGTTGGCCAGGCG	1	-18.4	No	No	No	Yes
	gcvB	ridA	TTTGGCTTACGGTTGTGATGTTGTGTTG	CTGAACGACTTCGCAACCGTAAACGCCACTT	4	-30.1	No	No	Yes	No
	cyaR	menF	CTGAAAAACATAACCCATAAAATGC	CAGGGAGAGGTCCGCGTGCAATCACTTACTACGGCGCTGG	1	-5.1	Yes	No	Yes	No
	omrA	gadX	TATTCGGTACGCTCTTCGTACCCTGTCTCTTGCACCAACCTGCGCGGATGCGCAGGTTTT	GAATAAGATTATAGAGTTTTACTCAGACATAAAAAAAACCCGGCATAGGGGACCGGGAAGAGGATAGTCTGCC	1	-30.8	No	No	No	Yes
	spf	paaJ	TTTTAGCCGCCCCAGTCAGTA	TCTGGAGCGTGTTTGAGCAT	3	-12.2	Yes	Yes	No	No
	arrS	yifK	GTAATCCGATTTAAATATCGAGTCTCCTTGTTTCGACTTAAGCTGGCAATTGGATTGCCAGCTTTCTTT	TCTTTATGCTGGCGGTGACGGCGATTTATAAAGTTTTTGGCCT	1	-20.4	No	No	No	Yes
	cyaR	rplL	CTGAAAAACATAACCCATAAAATGCTAGCTGTA	AAGACGACGCAGAAGCACTGAAAAAAGCTCTGGAAGAAGCTGGCGCTG	2	-12.1	No	No	Yes	No
	cyaR	ycbC	CTGAAAAACATAACCCATAAAATGCT	TGTTGATTATTGGCGCTGGCCTGGCGCTGCTGTGGTTTAGCCGTTTTCAAA	1	-12.7	No	No	Yes	No
	gcvB	mlrA	AAGTTTTATCGGAATGCGTGTTCTGGTGAACTTTTGGCTTACGGT	CATTGCTGGTGTGGTGCGGTGAAAATCGAACCTCCGCCCAA	1	-14.1	No	No	No	Yes
	mgrR	ybhL	GATTCGTTATCAGTGCAGGAAAATGCCTGTTAGCGTAAAAGCAAAACACAAATCTATCCATGCAAG	GGGCTGGCTTGCAAACTTATATGGC	1	-14.2	No	No	Yes	No
	arrS	acs	GTAATCCGATTTAAATATCGAGTCTCCTTGTTTCGACTTAAGCTGGCAATTGGATTGCCAGCTTTCTTT	CTACAAGGAGAACAAAAGCATGAGCCAAATTCACAAACACACCATTCCTGCCAACATCGCAGAC	1	-16.7	No	No	Yes	No
	ryeA	ychH	AAGGAAATGCTTCTGGCTTTTAACAGATAAAAAGAGACCGAACACGATTCCTGTATTCGGTCC	TTTTCGTCGGTGCCATTCTCTGGCTGG	1	-12.9	No	No	Yes	No
	omrA	azuC	ATTATTCGGTACGCTCTTCGTACCCTGTCTCTTGCACCAACCTGCGCGGATGCGCAGGTTTT	TTCAAAGACGTACCGCCAGGCAATATGTTCCGATAACAAAAAACCTGCTCCGGCAGGTTTTTTTG	1	-29.5	No	No	No	Yes
	omrA	gatD	ATTATTCGGTACGCTCTTCGTACCCTGTCTCTTGCACCAACCTGCGCGGATGCGCAGGTTTT	ATTATTATTGGTGCCGGAACCATTGGCCTGCTGGCCATTCAGTGCGCTGTCGCGCTGGGAG	1	-28.9	No	No	No	Yes
	arrS	blc	AATATCGAGTCTCCTTGTTTCGACTTAAGCTGGCAATTGGATTGCCAGCTTTCTTTTA	CTGCTCCCTCTCGTTGCCGCAGCGACAGCTGCATTTCTGGTCGTTGC	1	-19.6	No	No	Yes	No
	chiX	ygcN	AAAGTGACGGCATAATAATAAAAAAATGAAATTCCTCTTTGACGGGCCAATAGCGATATTGGCCATTTTTTTA	ATTGCAGGCACCGCTTGCGCGTTACGCT	1	-19.1	No	No	No	Yes
	gcvB	dapF	AAAAGTTTTATCGGAATGCGTGTTCTGGTGAACTTTTGGCTTACGGTTGTGA	AATCTTATGCGGCGTGGTGTCGATGGGAAA	1	-12.5	No	No	Yes	No
	arrS	phoP	AGCTGGCAATTGGATTGCCAGCTTTCTT	TCGATCTCGGATTGCCAGACGAGGACGGTCT	1	-18.5	No	No	No	Yes
	micA	lon	GAAAGACGCGCATTTGTTATCATCATCCCTGAATTCAGAGATGAAATTTTGGCCACTCACGAG	GAAATTAAACTAAGAGAGAGCTCTATGAATCCTGAGCGTTCTGAACGCATTGAAATCCCCGTATTGC	1	-15.1	No	No	Yes	No
	arrS	rpmE	TTTAAATATCGAGTCTCCTTGTTTCGACTTAAGCTGGCA	CAACATCCCGGGCAGCAAATAAGACCGGATTTCCGAAAAAAGCGCCGCACGGCGCTTTTT	1	-14.7	No	No	No	Yes
	sdsR	lpxC	GCCAACTTTTAGCGCACGGCTCTCTCCC	TCAGCCGTGCGCGTACGT	2	-22.1	No	No	Yes	No
	chiX	gadX	GTGACGGCATAATAATAAAAAAATGAAATTCCTCTTTGACGGGCCAATAGCGATATTGGCCATTTTTTTA	TAAAAGAGCATTAATCTTTGCGTTGTTATCTGTTTTTCTTGAGGATGAGCACTTTATACCGCTGCTTCTGAAC	3	-22.6	No	No	Yes	No
	arcZ	yoaC	TTCCCTGGTGTTGGCGCAGTATTCGCGCACCCCGGTCTA	TGTATCAGCGCCAACACCAAGTTCGATGAATGAAAGCACGGCGAAGGG	6	-25.3	Yes	No	Yes	Yes
	spf	ackA	GTAGGGTACAGAGGTAAGATGTTCTATCTTTCAGACCTTTTACTTCACGTAATCGGATTTGGCTGAATA	CTATGCCGGAAGAGTCTTACCTCTACGCCCTGCCTT	14	-33.5	No	Yes	Yes	No
	spf	rbsD	ATTTTAGCCGCCCCAGTCAGTA	TTCGCAGCGGAGAATGTTCTCCGTATGCGAATATCATTCTCTGTGCT	1	-7.4	No	Yes	No	No
	omrA	yoaK	CCTGTCTCTTGCACCAACCTGCGCGGATGCGCAGGTTTTTTT	TTTGATTGGTGATAACATGCGAATCGGTATTATTTTTCCGGTTGTAATCTT	1	-14.8	No	No	No	Yes
	spf	rpsU	CGTAATCGGATTTGGCTGAATATTTTAGCCGCCCCAGTCAGT	ACGCCGCACTCGTCTGTACTAATTCCCCGAGAGCGTTGCT	1	-12.8	No	Yes	No	No
	spf	ihfA	TAGGGTACAGAGGTAAGATGTTCTATCTTTCAGACCTTT	ACCCGGGCAGAAGTTAAAAAGCCGGGTCGAAAACGCTTCGCCCAAAGAC	1	-16	No	No	Yes	No
	omrA	yjeI	CGTACCCTGTCTCTTGCACCAACCTGCGCGGATGCGCAGGTTTTTTTTC	GCAGAGTGCCAGCTGATTGGTACTGCGACAGGTAAGCAAAGCAACTGGCTTTCCGGGCAACACG	1	-28.9	No	No	No	Yes
	cyaR	gadA	CTGAAAAACATAACCCATAAAATGCTAGCTGTACCAGGAACCACCTCCTTAGCCTGTGTAATC	CCAGCGGTGGCTTCCTGGC	1	-21.8	No	No	Yes	No
	arrS	mutS	GTAATCCGATTTAAATATCGAGTCTCCTTGTTTCGACTTAAGCTGGCAATTGGATTGCCAGCTTTCTTTTA	GTCGCTAACGTGCATCTCGATGCACTGGAGCACGGCGACACCATTGCCTTTATGCACAGCGTGC	1	-21.6	No	No	No	Yes
	omrB	ygiV	TCCCAGAGGTATTGATAGGTGAAGTCAACTTCGGGTTGAGCACA	CAAACCTGACACTGGATGTAAACATTATCGATTTCCCATCAATACCTGTGGCGATG	56	-35	No	Yes	Yes	Yes
	mgrR	eptB	AATCTATCCATGCAAGCATTCACCGCCGGTTT	TAAGCAGGGTGTTATCACCTGTTTGTCCAGGGTTTGTTTGCATGAGATACATC	5	-22.6	Yes	Yes	No	No
	gcvB	yacH	GTTGTGATGTTGTGTTGTTGTGTTTGCAATTGGTCTGCG	CGGTAATGGCTGGCAACACAACGGCGACAACAT	2	-27.3	No	No	Yes	No
	arcZ	uvrA	TTTCCCTGGTGTTGGCGCAGTATTC	TTGCCCAACGCCAGTTGAA	1	-22.5	No	No	Yes	No
	sroH	mscL	GTTCTGAATACCAGAGATAATTCTCTGGCGAAACCCACCT	TATTAAAGAATTTCGCGAATTTGCGATGCGCGGGAACGTGGTGGATTTGGCGGTGGGTGTCATTATCGGTGCG	1	-22.5	No	No	Yes	No
	arcZ	lpoA	TTCCCTGGTGTTGGCGCAGTATTC	TTCTCACAAATGCGCCAGGTTCAGGG	1	-22.7	No	No	Yes	No
	glmZ	rpsU	AGATGCTCATTCCATCTCTTATGTTCGCCTTAGTGCCTC	TCGTCTGTACTAATTCCCCGAGAGCGTTGCTCTCCG	1	-13	No	No	Yes	No
	gadY	waaL	GTGCCAACAGGGAGTGTTATAACGGTTTATTAGT	CTCCTGTTCCCTATAATTTGTGTT	1	-8.6	No	Yes	No	No
	rdlA	gyrB	TCAAGATTAGCCCCCGTTCTGTTGTCAGGTTGTACCTCTCAACGTGCGGGGGTTTTCT	TAACTCTGTCTCTGTAC	1	-10.6	No	No	Yes	No
	cyaR	nupX	GCTGTACCAGGAACCACCTCCTTAGCCTGTGTAATCTCCCTT	CTTTGGTTCTATCGGGGTGGTGGTGGGGGCG	3	-24	No	No	Yes	No
	chiX	usg	GACGGCATAATAATAAAAAAATGAAATTCCTCTTTGACGGGCCAATAGCGATATTGGCC	GAACCGGAATGTCATCGCCGTACCAGACAGTCTGACCAGCCAGCTGCTGGCGGCACTGAAACCGTTAATCGAT	1	-22.3	No	No	No	Yes
	arrS	mpl	CGATTTAAATATCGAGTCTCCTTGTTTCGACTTAAGCTGGCAATTGGATTGCCAGCTTTCTTTT	GACTGCGCCTTCTTCGACAAACGCTCTAAATTTGTTCAT	1	-12.7	No	No	Yes	No
	ryeA	ybeL	AAGGAAATGCTTCTGGCTTTTAACAGATAAAAAGAGACCGAACACGATTCCTGTATTCGGTCCAGGGAA	CAATGGCGAACGTGATATCGACGCACTGGTGGAACAGGCGCGCGAGCGCGTAATAAAAACAG	1	-18.3	No	No	No	Yes
	gcvB	nlpC	CGTGTTCTGGTGAACTTTTGGCTTACGGTTGTGATGT	ATAAAGCACCGCCGCCAAATGCCAGACTTTCTGATTCG	2	-20.8	No	Yes	No	No
	omrA	mscM	CCCAGAGGTATTGATTGGTGAGATTATTCGGTACGCTCTTCGTACCC	AGGAAATTTTCGCCAACTTTATCTCTGGTC	4	-27.3	No	No	Yes	No
	spf	malE	ACTTCACGTAATCGGATTTGGCTGAATATTTTAGCCGCCCCAGTCAGTA	AGACGTGGGCGTGGATAAC	1	-17	No	No	No	Yes
	micA	gatA	AAAGACGCGCATTTGTTATCATCATCCCTGAATTCAGAGATGAAATTTTGGCCACTC	TTTCAGCAAGCGGATGATGATAACGACGT	2	-25.8	Yes	No	Yes	No
	ryeA	yqiB	GCTTCTGGCTTTTAACAGATAAAAAGAGACCGAACACGATTCCTGTATTCGGTCCAGGGAAATGGCTCTTGGG	TTTAGCACATGGAGCGATGGCGATTCCGGTTTATTAGCGTCG	1	-20.6	No	No	Yes	No
	ryeA	gcvH	TGCTTCTGGCTTTTAACAGATAAAAAGAGACCGAACACGATTCCTGTATTCGGTCCAGGGAAATGGCTCTTGGG	GACGAGTAACGGCTTTATTCCTCTTCTGCGGGAGAGGATCAGGGTGAGGAAAATTTATGCCTCACCCTCACTCTCTT	2	-26.7	No	No	Yes	Yes
	chiX	pfo	AAGTGACGGCATAATAATAAAAAAATGAAATTCCTCTTTGACGGGCCAATAGCGATATTGGCCATTTTTTTA	TTACGATCTGGCACTCAGCC	1	-8.7	No	No	No	Yes
	arrS	preT	TTAAATATCGAGTCTCCTTGTTTCGACTTAAGCTGGCAATTGGATTGCCAGCTTTCT	TTCCGGCAAGCGAAAAAGAGTTTACCAGCGC	1	-14.8	No	No	Yes	No
	arcZ	tar	TTTCCCTGGTGTTGGCGCAGTATTCGCGCACCCCGGTCTA	ATTATGGCAATACTGGAGCTTATTTCGCTCAGCCAACCCAGGGAATGC	39	-34	Yes	Yes	Yes	Yes
	ryeA	cof	GATAAAAAGAGACCGAACACG	TGATTGGACATTGCCGAAATCAGGCTGTCTCTCACTATTTGACG	1	-8.1	No	No	No	Yes
	chiX	chbB	ACACCGTCGCTTAAAGTGACGGCATAATAATAAAAAAATGAAATTCCTCTTTGACGGGCCAATAGCGATATTGGCCATTTTTTT	ATTAATTTATTTTAAATTTTCCCGTCAAAGAGTTATTTCATAAATCAATACCGCAATATTTAAATTGCGGTTTT	60	-35.7	No	Yes	Yes	Yes
	arcZ	mqsR	TTCCCTGGTGTTGGCGCAGTATTCGCGCACCCCGGTCTA	GTTAAAAAACTTGTCAATGCCGGGCAAGTT	6	-21	Yes	Yes	No	No
	arrS	rppH	TGTAATCCGATTTAAATATCGAGTCTCCTTGTTTCGACTTAAGCTGGCAATTGGATTGCC	AAAGACGTTCGAATCCTTGCTTCAACGCGTAACTGGTTGCGCTACAAATTACCGAAACGTTTGGTGCG	1	-18.8	No	No	No	Yes
	gcvB	bcsA	TGTTGTTGTGTTTGCAATTGGTCTGCGA	TCTGCGTTACTCAGCCG	1	-8.6	No	No	No	Yes
	gadY	gadC	TTATAACGGTTTATTAGTCTGGAGACGGCAGACTATCCTCTTCCCGGTCCC	ACTCTGGGGCCGAGATGGGGATTTGCAGC	1	-27.4	No	No	No	Yes
	cyaR	bglB	CTGAAAAACATAACCCATAAAATGCT	AAAAAAATAACCATTAA	1	-1.2	No	No	Yes	No
	omrB	ybjE	CCCAGAGGTATTGATAGGTGAAGTCAACTTCGGGTTGAG	GCCTTTATTCTTGATCTCCCCATCAATACCGCGCTGGC	2	-27.5	No	No	Yes	No
	ryeA	moeB	GGCTTTTAACAGATAAAAAGAGACCGAACACGATTCCTGTATTCGGTCCAGGGAAATGGCTCTTGGG	TTTTGCCGCGAAGGTACCGCTGGTTTCCGGCGCGGCAATTCG	1	-20.5	No	No	No	Yes
	cyaR	fldA	CTGAAAAACATAACCCATAAAATGC	TGTTTGGTTGTGGTGACCAGGAAGATTACGCC	1	-11.6	No	Yes	No	No
	cyaR	adhE	AGGAACCACCTCCTTAGCCTGTGTAATCTCCCTTACACGGGCTTATTTTT	TGATTATCGCGCTGGGTGGTGGTTCCCCGATG	2	-31.2	Yes	Yes	Yes	No
	gadY	ubiF	ATCCTCTTCCCGGTCCCCTAT	TTGCTTAAAGGGTTAGGGGTCTGGGATGC	5	-22.9	No	No	No	Yes
	gadY	cpxP	TAACGGTTTATTAGTCTGGAGAC	TCATCGTTGAAGCTATTGAGTAGTAGCAACTCACGTTCCCA	1	-7.3	No	No	No	Yes
	sdsR	iraP	ATTAATGCCAACTTTTAGCGCACGGCTCTCTCCC	CGGAGCTGCTGCGCGATT	1	-20.6	No	No	No	Yes
	gadY	nfrA	TGCCAACAGGGAGTGTTATAACGGTTTATTAGTCTGGAGA	ATACAGCGCTAACCCCGTTCAG	1	-11.3	No	No	No	Yes
	cyaR	hflX	AGCTGTACCAGGAACCACCTCCTTAGCCTGTGTAATC	TGATGCTGGTGAGCAGGCGGTACTGGTACACATCT	6	-29.5	Yes	Yes	No	No
	gadY	ompX	TTCCCGTGCCAACAGGGAGTGTTATAACGGTTTATTAGTCTGGAGACGGCAGACTATCCTCT	TTGCATGTCTTTCAGCACTGGCCGCAGTTCTGGCTTTCACCGCAGGTACTTCCGTAGCTGCGACTTCTACTGT	1	-32.9	No	No	No	Yes
	cyaR	yciQ	CTGAAAAACATAACCCATAAAATGCTAGCTGTACCAGGAACCACCTCCTTAGCCTGTGTAATCTCCCTTACACGGGCTTATTTTTTA	TATTCCGGTGGTGGTGCTGGCGGCGGCGCGGGTGGCGGAGGCGGTGGTGGCTGGTAATT	23	-48.4	No	Yes	Yes	No
	gadY	phoQ	CTGAGAGCACAAAGTTTCCCGTGCCAACAGGGAGTGTTATAACGGTTTATTAGTCTGG	CTATGTGCTCTCAGCCAAT	4	-20.1	No	Yes	No	No
	cyaR	lpd	CTGAAAAACATAACCCATAAAAT	ACCGAACCAGAAGTTGCATGGGTGGGTCTGA	1	-9	No	Yes	No	No
	sdsR	bfd	TTTTAGCGCACGGCTCTCTCCCA	AAAAAAATTCGTCAGGCTGTGCG	2	-15.4	No	No	No	Yes
	gcvB	ygeR	CACTTCCTGAGCCGGAACGAAAAGTTTTATCGGAATGC	AGATTTTGAGTGCGGGACG	1	-10.5	No	No	Yes	No
	gadY	glgC	GGGAGTGTTATAACGGTTTATTAGTCTGGAGACGGCAGACTATCCTCTTCCCGGTCCC	ATTGTTACCGGAAGTATGGGTAGGTCGCTCGTGCCGTCTGCG	2	-33.1	No	No	No	Yes
	arcZ	hflK	TTTCCCTGGTGTTGGCGCAGTA	AACCTGGCGGCAACTCTGAGGGAAATGGAA	2	-23	No	No	Yes	No
	cyaR	ftnA	GCTAGCTGTACCAGGAACCACCTCCTTAGCCTGTGTAAT	AATGAGCGCCTGGTGCAGCTATC	5	-25.5	No	No	Yes	No
	cyaR	putP	TAAAATGCTAGCTGTACCAGGAACCACCTCCTTAGCCTGTGTAATCTCCCTTACACGGGCTTATTTTTT	CTGATGGGTTGGGGGCTGGGTTACTTCGGGCAGCCGCACATTCT	4	-33.1	Yes	Yes	No	No
	dsrA	hns	AATTTTTTAAGTGCTTCTTGCTT	ATTACTACAATGAGCGAAGCACTTAAAATTCT	2	-20	Yes	Yes	No	No
	micA	oppA	GAAAGACGCGCATTTGTTATCATCATCCCTGAATTCAGAGATGAAATTTTGGCCACTCAC	TACGTGAATGCGCGTCTGGTG	1	-20.5	No	No	No	Yes
	glmZ	lplA	TAAGAGCAGGCGTTTTTT	ATGTCCACATTACGCCTGCTCATCT	1	-20.8	No	No	Yes	No
	spf	marB	GGGTACAGAGGTAAGATGTTCTATCTTTCAG	ATGGGTACTGGCAGTGATAAGTCGGATGCG	1	-6.1	No	No	Yes	No
	arcZ	bepA	TTCCCTGGTGTTGGCGCAGTATTCGCGCACCCCGGTCTA	CTATCTGGCGAAAGCGCGCACACTGGGGATG	2	-31.6	No	No	No	Yes
	omrA	lolC	ATTATTCGGTACGCTCTTCGTACCCTGTCTCTTGCACCAACCTGCGCGGATGCGCAGGTTTT	CTTTATGGTGCAAGGGGCCAGCG	1	-24	No	No	Yes	No
	gadY	nhaA	CCGTGCCAACAGGGAGTGTTATAACGGTTTATTAGTCTGGAGACG	TCTATCTCTTCGGCGGTAATTGGATACAGCTGGTTACGC	1	-16.8	No	Yes	No	No
	ffs	ybaT	AGCTGGCAGGGCCCCCACCC	CAGTCTGTGGTCCCAGGGTAGCCGTGCGT	3	-17.6	No	No	No	Yes
	cyaR	pitA	CTGAAAAACATAACCCATAAAA	TGCTACATTTGTTTGCTGGCCTGGAT	1	-3.1	Yes	No	No	Yes
	gcvB	fsaA	CATTTACCCTGTCTGTCCATAGTGATTAATGTAGCACCGCCTAATTGCGGTGCTTTTTTT	TTGAGCAGGACTGGCAGGGAGCG	5	-20.8	No	No	Yes	No
	rydC	inaA	CCGTATTCTTCGCCTGTAC	CGTTAATAAAAATGACAGGCGATAGGGTATGGCAGTTTCAGCAAAGTACGACGAATTTAATCACTGGTGGGCAACAGAGGGCGACTGGGTTGA	5	-24.8	No	Yes	No	No
	sdsR	ivy	CAACTTTTAGCGCACGGCTCTCTCC	ACGTTGGGAGATGAGACGTATCAGGTGATGAGCGCGTGCAA	1	-19.2	No	No	No	Yes
	arcZ	ftsP	TTCCCTGGTGTTGGCGCAGTATTCGCGCACCCCGGTCTAGC	GCTGTTTATGACTGTACAACGTGCGCACTGGTCATTTACGCCAGGGACACGC	3	-41.3	No	Yes	No	No
	cyaR	fbaA	CTAGCTGTACCAGGAACCACCT	TATTCCACGGTGGTTCCGGTTCTAC	4	-21.1	No	Yes	No	No
	chiX	yfjL	AAGTGACGGCATAATAATAAAAAAATGAAATTCCTCTTTGACGGGCCAATA	TACTCCATCGTCACAGAGGA	3	-16.7	No	No	No	Yes
	arcZ	asnC	TTCCCTGGTGTTGGCGCAGTA	AAACAATTTGGCGTCAGTCCGGGGACGATTCACG	15	-23.6	No	Yes	No	No
	mgrR	ilvL	TCGTTATCAGTGCAGGAA	ATTAGCCTGGTCGTGATTAGC	1	-9.8	No	No	No	Yes
	gcvB	tufB	GTGATTAATGTAGCACCGCCTAA	TAAAACCTACGGCGGTGCTGCTCGCGC	12	-26.5	No	No	Yes	No
	arcZ	yegT	TTCCCTGGTGTTGGCGCAGTATTCGCGCACCCCGGTCTAG	AAGGTCGATGATCGCGATATTGCGTTGACACAAGGGGAAGT	28	-40.4	Yes	Yes	Yes	Yes
	arcZ	malK	AACAGTGCTGTGCCCTTGTAACTCATCATAATAATTTAC	TACAAAGGGAGAAGGGCATGGCGAGC	2	-23.1	No	No	Yes	No
	gcvB	yebF	ACATTTACCCTGTCTGTCCATAGTGATTAATGTAGCACCGCCT	TTTGCAGGACATTCAGGGTAAAGAT	10	-22.9	No	Yes	Yes	Yes
	arcZ	yafD	AGCCGGGGTCATTTTTT	TCCTTCTGGCGTAATGACCCTTTCGGCGGCACAT	2	-18.5	No	No	Yes	No
	arcZ	cysB	TTCCCTGGTGTTGGCGCAGTATTCGCGCACCCCGGTCTAGCCGGGGTCATTTTTTA	TTTATTGAGCGTTATCCTCGCGTTTCTTTGCATATGCACCAGGGCTCGCCGAC	12	-30.2	Yes	Yes	Yes	Yes
	arcZ	hslR	GATTTCCCTGGTGTTGGCGCAGTATTCGCGCACCCCGGTCTAGCCGGGGTCATTTTT	CGCTCACTCTGCGCCAGGGAAATGACGAAC	11	-26.7	Yes	Yes	Yes	No
	gadY	yieE	GGGAGTGTTATAACGGTTTATTAGTCTGGAGACGGCAGACTATCCTCTTCCCGGTC	CTGATTTCTGTTCGTCTCCCCTCCCAGTG	2	-25.4	No	No	No	Yes
	spf	rplO	AGAGGTAAGATGTTCTATCTTTCAGACCTTTTACTTCA	ATCGGTTCTGGCCTCGGTAAAAC	1	-11.4	No	No	Yes	No
	cyaR	htpX	AGCTGTACCAGGAACCACCTCCTTAGCCTGTGTAATCTCCCTTACACGGGCTTATTTTTT	TTCGGTTTTGGTGGTTCCTTCGTTTCGCTTCTGAT	4	-24.3	Yes	Yes	Yes	No
	omrB	brnQ	GATAGGTGAAGTCAACTTCGGGTTGAG	TCTTACCGTCCTGGGCGCAGCGTTTACCGCTGGCCGAAC	1	-13.3	No	Yes	No	No
	micA	talB	GAAAGACGCGCATTTGTTATCATCATCCCTGAATTCAGAGATGAAATTTTGGCCACTCACGAGTGGCCTTTTTCTT	TGAAGTTGATGCGCGTCTTTCCTA	11	-24.5	No	No	Yes	Yes
	spf	hemN	TAGGGTACAGAGGTAAGATGTTCTATCTTTCAGAC	CACCTCGTACCCGACCGCG	3	-18.5	No	No	No	Yes
	gadY	nuoG	AACAGGGAGTGTTATAACGGTTTATTAGTCTGGAGACGG	AAGCGACGGTACGGTGATCAACAACGAAGGCCGCGCCCAA	1	-13.7	No	No	Yes	No
	arcZ	napF	TTCCCTGGTGTTGGCGCAGTATTCGCGCACCCCGG	GCTATTTTCTCCGCGCCACACCAGGG	7	-29.1	Yes	Yes	Yes	Yes
	arcZ	gadC	TTCCCTGGTGTTGGCGCAGT	ATGAGCAACCCAGGGCGCGACTATCCGTTGGCTATGTTACTGCTGATGGTGGCGG	1	-17.3	Yes	No	Yes	No
	cyaR	ybeD	CTGAAAAACATAACCCATAAAATGCTAGCTGTACCAGGAACCACCTCCTTAGCCTGTGTAATC	TTGATCAGGTGGTTGAAGTGGTACAGCGCCATGC	19	-30.7	No	Yes	Yes	No
	spf	tnaA	ATCGGATTTGGCTGAATATTTTAGCCGCCCCAG	GAAAGATGCGATGGTGCCGATGGGCGGCCTGCTGTG	1	-17.2	Yes	No	Yes	No
	gadY	ftsY	TGCCAACAGGGAGTGTTATAACGGTTTATTAGTCTGGAGACGG	AAGGCGGACGACTTTATAGAGGCACTTTTTGCCCGAGAGG	1	-18.7	No	No	Yes	No
	oxyS	yobF	AGAAACGGAGCGGCACCTCTTTTAACCCTTGAAGT	TCGGGTTAAACGAGGTACAGTTCTGTTTATGTGTGG	3	-30.8	No	No	No	Yes
	gcvB	ebgR	ACGGTTGTGATGTTGTGTTGTTGTGTTTGCAATTGGTCTGCGATTCAGACCATGGTAGCAAAGCTACCTTTTTTCACTTCCTGTACAT	CATCAGGGAAAGTAAAAAAGGTAAACATGGCAACACTAAAAGACATCGCAATCG	21	-41.3	Yes	Yes	No	No
	micA	ispB	GAAAGACGCGCATTTGTTATCATCATCCCTGAATTCAGAGATGAAATTTTGGCCACTCACGAGTGGCCTTTTTCTT	AAACTACATGCGCGTTATCTATAGCAAAACCGCGCGTCTG	3	-25.1	No	No	Yes	No
	sroH	rpoB	CAGACTGAAGAAATTCAGACATCCCGCAACCTGCGATTATCGC	TGGTCTGGAAGCTGCTTTC	1	-9.8	No	No	Yes	No
	chiX	fadE	GACGGCATAATAATAAAAAAATGAAATTCCTCTTTGACGGGCCAAT	ATCTCGGCCCGTCTGGGGGATATT	2	-27.2	No	No	Yes	No
	omrB	znuA	CCCAGAGGTATTGATAGGTGAAGTCAAC	CGCAGCTTGAAGATGTGAAACCGCTACTGATGAAA	1	-8.5	No	No	No	Yes
	cyaR	malM	GCTGAAAAACATAACCCATAAAATGCTAGCTGTACCAGGAACCA	CTTTATCAGCAGTGTAAAAGGCAAGGGGTAATTACGCCCCACAGTGCTGATTTTGCAAC	10	-12.6	No	No	Yes	Yes
	cyaR	rpoA	CTGAAAAACATAACCCATAAAATGCTAGCTGTACCAGGAACCACCTCCTTAGCCTGTGTAATCTCCCTTACACGGGCTTATTTTTTA	TATATCGGTGATCTGGTACAGCGTACCGAGG	5	-25.6	No	Yes	Yes	No
	cyaR	miaA	GAAAAACATAACCCATAAAAT	TGTTGGCTTCAGGTTTTG	1	-4.7	No	No	Yes	No
	gadY	osmY	CTGGAGACGGCAGACTATCCTCTTCCCGGTCC	ATGTTGACCTCTGCCGTCGCGACC	2	-20.9	No	No	No	Yes
	gadY	yaiZ	TTATTAGTCTGGAGACGGCAGACTATCCTCTTCCCGGTCCCCTAT	ATATTCATTCTTAATGGCGTGGTGGGGTTACTGGGAT	2	-18.9	No	No	No	Yes
	cyaR	cysI	TAAAATGCTAGCTGTACCAG	CTGAAAAAGAACGTCAAACCGGTGCACCAG	1	-8.8	No	No	No	Yes
	gadY	arnC	CTGGAGACGGCAGACTATCCTCTTCCCGGTCC	TACCCTTGATGCCGATCTCCAGAATCCG	1	-21.3	No	No	Yes	No
	gadY	rpiA	CTGAGAGCACAAAGTTTCCCGTGCCAACAGGGAGTGTTATAACG	AGAAGTTATCCCGATGGCACGTAGTGCAGT	2	-22.2	No	No	Yes	No
	ryfD	lpp	AATTGAGGGATGACCTCATTTAATCTCCAGTAGCAACTTTGATCCGT	CTACATGGAGATTAACTCAATCTAGAGGGTATTAATAATGAAAGCTACTAAACTGGTACTGGGCGCGGTAA	3	-21.1	Yes	No	No	Yes
	gadY	pfo	CTGAGAGCACAAAGTTTCCCGTGCCAACAGGGAGTGTTATAACGGTTTATTAGTCTGGAGACG	ACGATCTGGCACTCAGCCA	3	-12	No	No	No	Yes
	arcZ	oppA	TTTCCCTGGTGTTGGCGCAGTATTCGCGCACCCCGGTCTAGCCGGGGTCATTTTT	GCTGGCGTTCTGGCTGCGCTAATGGCAGGGAATGT	5	-42.4	Yes	No	Yes	Yes
	mgrR	pyrG	CATGCAAGCATTCACCGCCGGTTT	CTATATTTTTGTGACCGGCGGGG	13	-19.1	No	Yes	Yes	No
	rybB	rspB	ATTTCGGTTCAAGGTTGATGGGTTTTTTGTTA	ATTCCTGAAGCAGTGGCCGAT	1	-13	No	No	No	Yes
	gcvB	yghJ	TTTTCACTTCCTGTACATTTACCCTGTCTGTCCATAGT	ATTCTGGAACAGGGTCTTTGCCGGAAGTGAAACC	2	-30.5	No	Yes	No	No
	gcvB	dppA	AAAGCTACCTTTTTTCACTTCCTGTAC	CTGATCAGTGAAGTGAAAAAGGT	1	-19.7	Yes	Yes	No	No
	oxyS	gatY	AACCCTTGAAGTCACTGCCCGTTTCGAGAGTTTCTCAACTCGAATAACTAAAGCCA	CAATCTCGAAACGATGCAAGTGGTGG	3	-21.7	No	Yes	No	No
	gcvB	ompT	CTGTCCATAGTGATTAATGTAGCACCGCC	GAACTTTTATGCGGGCGAAACTTC	1	-10.1	No	No	No	Yes
	chiX	ompF	AAGTGACGGCATAATAATAAAAAAATGAAATTCCTCTTTGACGGGCCAATAGC	CATGACCTATGCCCGTCTTGGTTTTAAA	2	-16.8	No	Yes	No	No
	cyaR	proP	AAATGCTAGCTGTACCAGGAA	TTTATGGGCAGCTGGCTGGACTTCGG	1	-19.2	No	No	No	Yes
	gcvB	glpA	CGAAAAGTTTTATCGGAATGCGTGTTCTGGTGAACTTTTGGC	ATTGCCGAATATGCCGA	1	-14.5	No	No	Yes	No
	gadY	cadA	TTAGTCTGGAGACGGCAGACTA	ACATGCTGCCGTCTCTGTATCGT	1	-22	No	Yes	No	No
	gcvB	cof	TTTTATCGGAATGCGTGTTCTGGTGAACTTTTGGCTTACGGTTGT	ATTGCCGAAATCAGGCTGTCTCTCACTATTTGACG	1	-15	No	Yes	No	No
	cyaR	yebO	CTGAAAAACATAACCCATAAAATGCTAGCTGTACCAGGAACCACCTCCTTAGCCTGTGTAATCTCCCTTACACGGGCTTATTTTTT	AAGTTGTAAATTCAGGCGTGATGAACATTGCGTCTTTGGTTGTATCGGTGGTGGTTCTTCTTATC	35	-29.1	Yes	Yes	Yes	Yes
	chiX	fklB	AAGTGACGGCATAATAATAAAAAAATGAAATTCCTCT	TTTATACCCTAAGAAAGGAAATACGATG	1	-5.1	No	No	Yes	No
	cyaR	ilvL	CCAGGAACCACCTCCTTAGCCTGTGTAAT	ATGCAAGAAAAGACAAAATGACAGCCCTTCTACGAGT	1	-4.7	No	No	Yes	No
	arcZ	yiaF	AAACAGTGCTGTGCCCTTGTAACTCAT	ATTACCGGCACAGCATCAGG	1	-20.4	No	Yes	No	No
	glmZ	ylaB	CCCACTTGTTGTCATACAGACCTGTTTTAACGCCTGCTCCGTA	ATTTCGGGAGTACTGATTCTTTCAGTATT	1	-10.6	No	No	Yes	No
	mgrR	pepA	ATCCATGCAAGCATTCACCGCCGGTTT	TAAAGGTTTAACCTTCGACTCCGGCGG	2	-15.2	Yes	No	Yes	No
	gadY	ubiE	TATGCCGGGTTTTTTTTA	AAAGCACTGCGTTCAATGTATCGCGTGCTGAAACCCGGC	3	-16.9	No	No	No	Yes
	dsrA	rbsD	ATTTCCTGGTGTAACGAATTTTTTAAGTGCTTCTTGCTTAAGCAAGTTTCATCCCGACCCCCTC	CATTGAAATTCGTTACACCACGCATG	60	-22.6	Yes	Yes	Yes	Yes
	arcZ	prmC	TTCCCTGGTGTTGGCGCAGTATTCGCGCACCCCGGTCTA	TTTAACCGGGGTGCGAGAAT	1	-28.2	No	No	Yes	No
	rybB	ftsI	TTAGTGCCACTGCTTTTCTTTGATGTCCCCATTTTGTGGAGCCCATCAACCCCGCCATTTCGGTTCAAGGTTGATGGGTTTTTTG	ACTTACTCACGTTTTGGACTGGGAAAAGCGACCAATTTGGGGTTGGTCGGAGAACGCAGTGGCTTATATCC	6	-55.1	Yes	Yes	No	Yes
	gadY	ybaT	GACTATCCTCTTCCCGGTCCCCTA	ATGGTGGGGGCGGGGATC	2	-21.7	No	No	No	Yes
	sdsR	rseP	AATGCCAACTTTTAGCGCACGGCTCTCTCCCAAGAGCCAT	ATTGGGATGCCGTGCGTTTGCAGTTGGTCGATAAAATTGGCGATGAAAGCACC	3	-36.3	No	Yes	Yes	No
	arcZ	otsB	TTCCCTGGTGTTGGCGCAGTATTCGCGCACCCCGGTCTA	AAATGGCGTTACAGCAGGGAAAGT	2	-23.4	Yes	Yes	No	No
	micA	srkA	TTTGTTATCATCATCCCTGAATTCAGAGATGAAATTTTGGCCACTCA	ATGTTTTCCGGATGATGGGATGAATAA	1	-17.7	Yes	No	Yes	No
	gcvB	flgE	ACATTTACCCTGTCTGTCCATAGTGATTAATGTAGCACCGCCT	TGTTTTCGACAGTCAGGGTAATG	3	-21.9	No	Yes	No	No
	micA	hupB	AAAGACGCGCATTTGTTATCATCATCCCTGAATTCAGAGATGAAATTTTGGCCACTC	TGAATCTCTGAAAGAAGGGGATGATGTA	8	-29.5	Yes	Yes	Yes	Yes
	omrB	clpP	CCCAGAGGTATTGATAGGTGAAGTCAACTTCGGGTTGAG	CCAGGAGACGGAAATGTCATACAGCGGCGA	1	-13.3	No	Yes	No	No
	isrC	sucC	ATTCAGAAACTCCCACAGCCGGACCTCCGGCACTG	AAAATCGGTGCCGGTCCGTGGGTAGTGAAATGT	11	-29.4	No	No	Yes	No
	gcvB	arsR	AGCTACCTTTTTTCACTTC	GGCATCGTTTTACTGCTCAGCGAACTGGGAGAGTTATGCGTC	1	-7.9	No	No	Yes	No
	arcZ	gadB	TTCCCTGGTGTTGGCGCAGTATTCGCGCACCCCGGTCT	TTGCCGATCTGTGGCATGCGCCTGCGCCGAAAAATG	1	-28.9	No	No	No	Yes
	arrS	metQ	GTAATCCGATTTAAATATCGAGTCTCCTTGTTTCGACTTAAGCTGGCAATTGGATTGCCAGCTTTCTTTTA	AAACCTGATCGTGACGCGTGAAGATAACAAAGACGCCGAGAACGTGAAGAAATTCGTC	1	-17.5	No	Yes	No	No
	gcvB	aidB	TTTACCCTGTCTGTCCATAGTGATTAATGTAGCACCGCCTA	ATTGCTGCGGGCGACGGGGGGAGTG	2	-24.9	No	No	Yes	No
	arcZ	clcA	TTCCCTGGTGTTGGCGCAGTAT	TACTTGAACGAAATACCAGGGTATTAGA	4	-18.4	Yes	Yes	Yes	No
	chiX	oppB	GATATTGGCCATTTTTTT	GAAGTGATGGCCAATATCGAAGCGAAATATCATCTTAATGATCCGATC	3	-21.7	No	No	No	Yes
	arrS	pepD	ATATCGAGTCTCCTTGTTTCGACTTAAGCTGGCAA	CTGTGACCTGCAATACTGTTTTGCGGGTGATCGACAAGGAGACTTAACGT	2	-28.8	No	No	No	Yes
	cyaR	ompX	GCTGAAAAACATAACCCATAAAATGC	ACTGGCGGTTACGCACAGAGCGACGCTCAGGGC	1	-8	Yes	No	No	Yes
	cyaR	torA	GCTGAAAAACATAACCCATAAAATGC	CGTCGAAAATGATTGCC	1	-1.3	No	No	No	Yes
	oxyS	yshB	TCACTGCCCGTTTCGAGAGTTTCTCAACTCGAATAACTAAAGCCAA	CAATAATTAATCTGGTATCGAGTGGCGCAGTTGA	1	-16.3	No	No	Yes	No
	cyaR	nlpD	AAAAACATAACCCATAAAATG	AGCGACCATGGGTAGCACCGGAACCAGTTCAACACG	1	-8.7	Yes	No	Yes	No
	cyaR	cpxP	GCTGAAAAACATAACCCATAAAATGC	CCTTGTCACCGCAGAAAA	6	-3.1	No	No	No	Yes
	cyaR	cpxR	GCTGAAAAACATAACCCATAAAATGC	GCGCCGTTCGCACTGGAGCGAG	1	-3.8	No	No	No	Yes
	cyaR	potC	GCTGAAAAACATAACCCATAAAATGC	GGCAACCATATTACTGGTGCTGTCGCTGGTGATGGTTATTGCCAGCC	1	-9.5	No	No	No	Yes
	cyaR	ompT	GCTGAAAAACATAACCCATAAAATGCT	CTGGGTGGAATCATCTGATAACGATGAACACTATGACCCG	1	-7.7	No	No	No	Yes
	gcvB	dppA	CTTCCTGAGCCGGAACGAAAAGTTTTATCGGAATGCGTGTTCTGGTGAACTTTTGGCTTACGGTTGTGATGTTGTGTTGTTGTGTTTGCAATTGGTCTGCGATTCAGACCATGGTAGCAAAGCTACCTTTTTTCACTTCCTGTACATTTACCCTGTCTGTCCATAGTGATTAATGTAGCACCGCCTAA	GCAAAAAACAAAAAAGGTCAGGCAGCGACAACCCACTGCAAAGGGTTAAAACAACAAACATCACAATTGGAGCAGAATA	49	-47.4	Yes	Yes	Yes	Yes
	arcZ	yghJ	TTCCCTGGTGTTGGCGCAGTATTCGC	CCGATACCTGATCCTGAACCAACACCAGAACCGGAGCCAGAACCTGTTCCTACGAAAACGGGTTATCTGACC	2	-24.4	Yes	No	No	Yes
	arcZ	ypfJ	TTCCCTGGTGTTGGCGCAGTATTCGCGCACCCCGGTCTA	ATGACATGAAAGACAAACTTGGCGCGGATGGCGATTTTGCCCAGGGGTACGTTATCG	7	-35.2	No	No	Yes	No
	gcvB	gdhA	CCCTGTCTGTCCATAGTGATTAATGTAGCACCGCCT	TTTATATCTATGGATCAGACA	3	-18	Yes	Yes	No	No
	gcvB	malM	GTCTGCGATTCAGACCATGGTAGCAAAGCTACCTTTTTTCAC	ATCAGCAGTGTAAAAGGCA	2	-7.4	No	Yes	No	Yes
	gadY	arcB	CGTGCCAACAGGGAGTGTTATAACGGTTTATTAGTCTGGAGAC	CAGTCTCCTGACCTTCCGGCCTGGGAAG	1	-20.1	No	No	Yes	No
	cyaR	oppB	GCTGAAAAACATAACCCATAAAATGC	TATGATGCGCCTCGCGCCGGGAAGCCCTTTTACCGGCGAACGTAC	1	-8.6	No	No	No	Yes
	mgrR	tnaB	AAGCATTCACCGCCGGTT	CTTCCCGAACGGCTTTATTTACGGGATCGGCGGTGCCGGG	2	-19.6	No	No	Yes	No
	gcvB	thrC	AATTGGTCTGCGATTCAGA	AAAGATCACAACGAGCAGGTCAGCTTTGCGCAAGCCGTAACCCAG	1	-10.5	No	No	Yes	No
	rybB	ydgD	GCCACTGCTTTTCTTTGATGTCCCCATTTTGTGGAGCCCATCAACCCCGCCATTTCGGTT	CTCCAAAGGGTAAAGCCGATAAAGCAGTGGCGCTGCGTTTTGTGTCAAAT	5	-28.9	No	No	No	Yes
	mgrR	malM	CGATTCGTTATCAGTGCAGGAAAATGCCTGTTAGCGTAA	CTTTATCAGCAGTGTAAAAG	1	-6.8	No	Yes	No	No
	glmZ	ygdQ	TCTTATGTTCGCCTTAGTGCCTCATAAACTCCGGAATGA	TTTTTTTGGCAGGGCTTTTTAGATGTTATTTGCATGGATAACCG	1	-12	No	Yes	No	No
	arcZ	ydiK	TTCCCTGGTGTTGGCGCAGTAT	ATGGTAAATGTTCGTCAGCCCAGGGATGTCG	1	-24.3	No	No	Yes	No
	arrS	ampD	TTTAAATATCGAGTCTCCTTGTTTCGACTTAAGCTGGCAATTGGATTGCCAGCTTTCTTTT	TTCGTGTGCTGGTCAGCAAGGAGACAAC	1	-25.9	Yes	No	No	Yes
	spf	tolB	ATCGGATTTGGCTGAATATTTTAGCCGCCCCAGTCAGTA	GGGGATGGGATCCGTGCTGAATTTGGTTTCTACAGATGGGCGTTTCAAAGCGCGTCTTCCGGC	1	-20.5	No	Yes	No	No
	spf	yghJ	ATCGGATTTGGCTGAATATTTTAGCCGCCCCAGTCAG	AACAAAGGTGGATCGGTGCTGATCATGGAAAACGTGATGAGCAAT	1	-13.2	No	Yes	No	No
	rybB	tnaA	CCATTTCGGTTCAAGGTTGATGGGTTTTT	GGATTATGTAATGGAAAACTTTAAACATCTCCCTGAACCGTTCC	4	-20.5	No	No	Yes	No
	mgrR	yibB	CACAAATCTATCCATGCAAGCATTCACCGCCGGTTTACTGGCGGTTTTTT	CTCTTGTTGCGTGGATAGATTTTGGC	24	-24	Yes	Yes	Yes	Yes
	gcvB	yceG	GCGTGTTCTGGTGAACTTTTGGCTTACGGTT	GTATAACACCTATACCATTACCGGTCTGCCGCCAGGTGCG	1	-18	No	No	No	Yes
	chiX	yncE	AAAGTGACGGCATAATAATAAAAAAATGAAATTCCTCTTTGACGGGCCAATA	TTGCTTGTTGTTTCATCATTCAGTACGCAGGCCGCAGAAGAAAT	5	-18.3	No	No	No	Yes
	chiX	glf	AAAGTGACGGCATAATAATAAA	ATAATAAAAACATGGAGC	1	-1.3	No	No	Yes	No
	mgrR	malM	AAGCATTCACCGCCGGTTTACTGGCGGTTTTTTTT	ATCAGCAGTGTAAAAGGCAA	2	-12.2	No	No	Yes	No
	arcZ	priA	TTCCCTGGTGTTGGCGCAGTATTCGCGCACCCCGGTCT	TCACTCGTATGCGCCAGCATTTACA	3	-20.2	No	Yes	No	No
	cyaR	slyB	GCTGAAAAACATAACCCATAAAATGCTAGCTGTACCAGGAACCACCTCCTTAGCCTGTGTAATCTCCCTTACACGGGCTTATTTTTT	TGGCGGTGCTGTTCTTGGTGGTTTCCTGGGGAATACT	50	-30.7	Yes	Yes	Yes	No
	omrB	syd	CAGAGGTATTGATAGGTGAAGTCAACTTC	ACGACTCAGTTTGCCGGGGATATGCACGCGCAGTTTGGCGATATC	1	-10.3	No	No	Yes	No
	cyaR	acs	GCTGAAAAACATAACCCATAAAATGCTAGCTGT	GTTGATGACGCGCTGAAAAA	1	-4.7	No	No	Yes	No
	cyaR	pepB	GCTGAAAAACATAACCCATAAAATG	AATGATTATCACGCGCT	1	-5.3	No	No	Yes	No
	ryeA	hdeA	CTAAAAGTTGGCATTAATGCAGGC	AGGCGTTATTCTTGGTGGTCTGCTTCTTCTGCCA	1	-14.8	No	No	No	Yes
	cyaR	yieK	GCTGAAAAACATAACCCATAAAATGC	GCAGGCACTGAAAAATG	1	-3.1	No	No	Yes	No
	arcZ	rnt	TGCGGCCTGAAAAACAGTGCTGTGCCCTTGTAACTCATCATAATAATTTACGGCGCAGCCAA	TTATGATGGCCGCCGCAGAA	1	-16	No	Yes	No	No
	cyaR	tcdA	TGCTAGCTGTACCAGGAACCACCTCCTTAGCCTGTGTAATCTCCCTTACACGGGCTTATTTTTT	TTTGCTGACGCGCATATTTGTGTGGTTGGTATCGGTGGTGTCGGTTCCTGGGCGG	2	-32.3	Yes	No	Yes	No
	gcvB	yidE	CTTCCTGAGCCGGAACGAAAAGT	CTTTGGTGGCAGTCGTCGGTTTGTTTATCGGCAACGTCAAATTTCGCGGCATAGGATTAGGT	1	-17.2	No	Yes	No	No
	cyaR	araJ	GCTGAAAAACATAACCCATAAAATGCTAGCTGTACCAGG	TGTTACTACAAAACGCCAAAGGCGGAGAGTTATTAGGTGCCG	1	-9.4	Yes	No	Yes	No
	cyaR	potD	GCTGAAAAACATAACCCATAAAATGCTAGCTGTACCAG	TATAACGAGCTGAAAAA	1	-6	No	No	Yes	No
	cyaR	pliG	GCTGAAAAACATAACCCATAAAATGC	AAAAACAAAACTAAAAA	1	0	No	No	Yes	No
	gcvB	sdhC	CCGGAACGAAAAGTTTTATCGGAATGCGTGTTCTGGTGA	GATGGATTTTGGCTATCTGGAAGAAACATTCGAAGCGGG	1	-18.3	No	Yes	No	No
	spf	yggX	GTAGGGTACAGAGGTAAGATGTTCTATCTTTCAGACCTTTTACTTCACGTAATC	AACGTGAAGCAGAAGGTCAGGATTTTCAGCTGTACCCCGGCGA	2	-40.2	Yes	No	Yes	No
	arcZ	yihF	TTCCCTGGTGTTGGCGCAGTATTCGCGCACCCCGGTCT	GCTGCGTTATACACCGGGTAAAGTTGTT	1	-27.3	No	Yes	No	No
	chiX	dppC	AAGTGACGGCATAATAATAAAAAAATGAAATTCCTCTTTGACGGGCCAATAGC	CAAGTCTGCTGCTGGCGCTGGTGCTGGTGGCAATTTTCGGCCCGTCGATTG	4	-25	No	No	No	Yes
	arcZ	mnmA	ATTTCCCTGGTGTTGGCGCAGTATTCGCGCACCCCGGTCTAGCCGGGGTCATTTTTTAGTG	ATTACCGTCGATGGCGATGAAATTGGTGAGCACCAGGGGCTGATGTAT	36	-37.2	No	Yes	Yes	Yes
	gcvB	thrL	CTTCCTGAGCCGGAACGAA	GCGCACAGACAGATAAAAATTACAGAGTACACAACATCCATGAAA	1	-5.3	Yes	Yes	No	No
	arcZ	ravA	TTCCCTGGTGTTGGCGCAGTATTCGCGCACCCCGGTCTA	ATTTTTATGCTGCGCCAGCAACTGG	3	-27.1	No	No	No	Yes
	cyaR	dtpB	CTGAAAAACATAACCCATAAAATGCTAGCTGTACCAGGAACCACCTCCTTAGCCTGTGTAATCTCCCTT	TGCTGCCCTGGTGCCGCAGCATTTGATGGGCTTTATTCTCGGGATGTGGTTCCTGACGCAGGCTGCCGCGTTCTTGCT	30	-41	Yes	Yes	Yes	Yes
	cyaR	rlpA	GCTGTACCAGGAACCACCTCCTTAGCCTGTGTAATC	CAGGATGGTTCGCTTTCTGGTCCTGGTATGG	2	-24.1	No	No	Yes	No
	spf	tufA	GGGTACAGAGGTAAGATGTTCTATCTTTCAGACCTTTTACTTCAC	GGTCGTGGTACCGTTGTTACCGGTCGTGTAGAACGCGGTATCATCAAAGTTGGTGAAGAAGTTGAAATC	1	-18.2	No	Yes	No	No
	arcZ	fre	TTCCCTGGTGTTGGCGCAGT	TTTGATTGCGGGCGGCACCGGGTTCTCT	2	-24.4	Yes	No	Yes	No
	arcZ	rlmI	TTCCCTGGTGTTGGCGCAGTATTCGCGCACCCCGGTCTA	ATCGATATTGTTGATCATCAGGGAAAATGG	11	-22.7	Yes	No	Yes	No
	gcvB	ygdQ	ACTTCCTGAGCCGGAACGAAAAGTTTTATCGGAATGCGTG	CTTCATTTTTTTGGCAGGGCTTTTTAGATGTTATTTGCATGGATAACCGA	1	-13.6	No	No	Yes	No
	arcZ	araG	TCCCTGGTGTTGGCGCAGT	GCAACTATGCGCCAACCACGGGTTCTGTAGTGATTAATGGGC	4	-23.8	No	No	Yes	No
	arcZ	mnmE	TTCCCTGGTGTTGGCGCAGTATTCGCGCACCCCGGTCT	TTAAGCGAAATCACCGGGGAATTTACTT	3	-23.8	Yes	No	Yes	No
	gcvB	yibB	TTTACCCTGTCTGTCCATAGTGATTAATGTAGCACCGCCTA	ACACTAAATAATAACATTGTGGACGATGACCAGGGCAT	3	-24.8	No	No	Yes	No
	spf	ldtD	GTAGGGTACAGAGGTAAGATGTTCTATCTTTCAGACCTTTTAC	TCTCCATTTCATTGCAAATATTCCGG	1	-5.2	No	No	Yes	No
	arcZ	tabA	ATTCGCGCACCCCGGTCT	GATTTTGTTGTGTTTTATCCGGGGGAAGTGCA	1	-18.7	Yes	No	No	Yes
	chiX	ruvB	AAGTGACGGCATAATAATAAAAAAATGAAATTCCTCTTTGACGGGCCAATAGCGATATTGGCCA	CTTTGGTGGACCTGTAGGTCTGGATAACCTGGCGGCAGCCATTGGCGAAGAACGTGAAACCA	1	-18.6	No	No	Yes	No
	rybB	folC	GCCATTTCGGTTCAAGGTTGATGGGTTTTTTG	GAAGTGATTGACGCGAGGAGAAGCGGTGGCAAG	2	-17	No	No	Yes	No
	omrB	mreB	GTGAAGTCAACTTCGGGTTGAGCACATGAATTACACCAGCCTG	GTCCATTGACCTGGGTACTGCGAATACC	1	-11.3	No	No	Yes	No
	cyaR	yagK	GCTGTACCAGGAACCACCTCCTTAGCCTGTGTAAT	AGGAGCCTGGTACAGCGCCCTGAG	3	-26.8	No	No	Yes	No
	dsrA	rbsD	ACATCAGATTTCCTGGTGTAACGAATTTTTTAAGTGCTTCTTGCTTAAGCAAGTTTCATCCCGACCCCCTCAGGGTCGGGATTTTTTTATT	TCACTCACCTTGAGCAGCTGCAAAAACACCAGGGAAATACCATTGAAATTCGTTACACCACGCATGAACAATTCAAACAACAAACCGCAGAAAGTCAGGCGGTAATTCGCAGCGGAGAATGTTCTCCGTATGCGAA	934	-40.5	Yes	Yes	Yes	Yes
	gcvB	crr	ACGAAAAGTTTTATCGGAATGCGTGTTCTGGTGAACTTT	ATCGAAGACGTGCCGGATGTCGTTTTTGC	1	-16.3	No	No	No	Yes
	omrA	yjhH	GGTATTGATTGGTGAGAT	AGTGCCGGTATTGATTG	2	-6.6	No	Yes	No	No
	ryjB	thrS	CTTTTGACGAAGGCGGCAGGGATCGCAGAAGGGTTATTGCTCTTTGCCGG	CTTCTCTTTGCCGTCTCGTCTG	1	-27.8	No	No	Yes	No
	arcZ	ygiM	GCCAAGATTTCCCTGGTGTTGGCGCAGTATTCGCGCACCCCGGTCTA	TATTACAAACTGACGCCAACACCAATTATGCCCAGGTGAAAGACAGCTCTGGCCGTACCGCCTGGATCCCGT	56	-32.9	Yes	Yes	Yes	Yes
	gadY	serA	GAGTGTTATAACGGTTTATTAGTCTGGAGACGG	TTACCTCTCCGCTGTGTGAATTCGA	1	-15.1	No	No	No	Yes
	arcZ	rcnB	TTCCCTGGTGTTGGCGCAGTATTCGCGCACCCCGGTCT	TTTCTAAGTATGAGTTAAGTAGTTTCATTGCTGACTTTAAGCATTTCAAACCAGGGGACACCG	4	-20.9	Yes	No	Yes	Yes
	ryhB	sdhC	CGCGATCAGGAAGACCCTCGCGGAGAACCTGAAAGCACGACATTGCTCACATTGCTTCCAGTATT	TCCTTTGTTATTACTGTCGTGCTTTCACTTCTCGCAGGAGTCCTCGT	130	-38.6	Yes	Yes	Yes	Yes
	spf	gapA	GTAGGGTACAGAGGTAAGATGTTCTATC	CCGTGTTCGATGCTAAAGCTGGTATCGCTCTGAACGACAACTTCGTGAA	1	-9.3	No	Yes	No	No
	spf	fadD	GTAGGGTACAGAGGTAAGATGTTCTATCT	GAGAATTACGTGACGAAGCGCGCGGCAAAGTGGA	1	-7.1	No	Yes	No	No
	csrB	elbB	GCAAGGCCAGAGGAAAAGTTGTCAAGGATGAGCAGGGAGCAACAAAAGTAGCTGGAATGCTGCGAAACGAA	AATCCGTCCTCTGGCCC	1	-22.3	No	No	Yes	No
	spf	tamB	GTAGGGTACAGAGGTAAGATGTTCTATCTTTCAGACCTTT	GGCACTGGATTTGCTCTATCAGTTCGAGT	1	-9.5	No	Yes	No	No
	spf	ygeY	TAGGGTACAGAGGTAAGATGTTCTATCTTTCAGACCTTTTACTTCACGT	ACCTCGGTCTGGAAGATGAATATACCCTGCTGGT	2	-30.5	No	No	Yes	No
	spf	cof	GTAGGGTACAGAGGTAAGATGTTCTATCTTTCAGACCTTTTAC	ACATTGCCGAAATCAGGCTGTCTCTCACTATTTGACGCACTGGCTGGACT	2	-11.8	No	Yes	No	Yes
	dsrA	aceK	ATTTTTTAAGTGCTTCTTGCTTAAGCAAGTTTCATCCCG	GTGACCTCCGGTGCGCAGCAGCGTTTCGAACAGGCCGACTGGCATG	1	-10.5	No	No	Yes	No
	spf	sodB	GTAGGGTACAGAGGTAAGATGTTCTATCTTTCAGACCTTTTACTTC	AATTAATAATAAAGGAGAGTAGCAATGTCATTC	1	-11.4	No	Yes	No	No
	arrS	wzyE	CGATTTAAATATCGAGTCTCCTTGTTTCGACTTAAGCTGGCAATTGGATTGCCAGCTTTCTTTTA	ATATGATCGTGCTGGCGCGTGAAGGGCTGGATTCGTTTGTCTCACGCGTGGTCTT	1	-24	No	No	Yes	No
	arcZ	yfdY	GCCGGGGTCATTTTTTA	TTTATGTTTCTTGCCCCGGCTTGTGGCTTGATGATTCGCTTTATG	2	-18.6	No	No	Yes	No
	gcvB	crr	AACTTTTGGCTTACGGTTGTGATGTTGTGTTGTTGTGTTTG	TTGGTAAAATCTTTGAAACCAACCACG	1	-8.3	No	No	No	Yes
	spf	secB	AGACCTTTTACTTCACGT	GTTTTCTACACATGTCAGAACAAAACAACACTGAAAT	1	-2.8	No	No	Yes	No
	mgrR	gsiA	GTGCAGGAAAATGCCTGTTAGCGTAAAAGC	AGGGCGAGGCGGTGGAAACGGGT	1	-12	No	No	Yes	No
	omrB	pcnB	CCAGAGGTATTGATAGGTGAAGTCAACTTCGGGTTGAGC	GTGCTAAGCCGCGAGGAAAGCGAGGCTGAACAGGCAGTC	1	-18.5	No	Yes	No	No
	cyaR	rpsI	GCTGTACCAGGAACCACCTCCTTAGCCTGTGTAATC	CGTTAAAGGTGGTGGTATCTCTGGTCA	5	-26.1	No	No	Yes	No
	gcvB	dapE	TACCCTGTCTGTCCATAGTGATTAATGTAGCACCGCCT	CATGGCGTGGGCAGGGTGAAACG	5	-20	No	No	Yes	No
	psrD	yobF	AGTAACCCGCAATGTGTGCGAATTATTGGCAAAAGGCAACC	CCTGAGTAAACACGTTGACGTTGAATACCGCTTCTCTGCCGAGCCTT	1	-11.9	No	No	Yes	No
	cyaR	mipA	TTCGCTGAAAAACATAACCCATAAAATGCTAGCTGTACCAGGAACCACCTCCTTAGCCTGTGTAATCTCCCTTACACGGGCTTATTTTT	ATGGTGGATAAATCCTGGACTGGCCTGATTT	10	-21.1	No	No	Yes	No
	gcvB	pcm	TTATCGGAATGCGTGTTCTGGTGAACTTTTGGCTTACGGTTGTGATGT	TTTCAACCCGTCATGGCGATGGATGGCAAGGTTGG	1	-15.4	No	No	No	Yes
	arcZ	tsaC	GGTGTTGGCGCAGTATTCGCGCACCCCGGTCT	TTGTCTTTCCCGCGCCTGCGACAACACCGCG	1	-26.6	No	No	Yes	No
	arcZ	aceK	AGCCGGGGTCATTTTTT	CTCGAAGTGACCTCCGGTGCGCAGCA	3	-21.2	No	No	No	Yes
	mgrR	fsr	CGATTCGTTATCAGTGCAGGA	ATTGGGGATGTTGACCATATTCCTGCCTGATAACCGGCATAAAGACTGATTTCATTGCAGCCAAAGGC	7	-21.6	No	No	No	Yes
	cyaR	anmK	GCTGAAAAACATAACCCATAAAATGCTAGCTGTACCAGGAACCA	CATTCCTGGGCAGCCGGTTGGG	2	-25.1	No	No	No	Yes
	chiX	tilS	CCTCTTTGACGGGCCAATAGCGATATTGGCCATTTTTTTAG	TTTCTGCGCCTGCGCGTAGTGCCGTTATTGCAGCAGCGTT	1	-18.3	No	No	No	Yes
	gadY	ampE	TCCTCTTCCCGGTCCCCT	TGTTCTGGCTGATTGTGGGGGGAACCTGGGGAC	1	-20.1	No	No	No	Yes
	rybB	ompA	ATTAGTGCCACTGCTTTTCTTTGATGTCCCCATTTTGTGGAGCCCATCAACCCCGCCATTTCGGTTCAAGGTTGATGGGTTTTTTG	TAACGAGGCGCAAAAAATGAAAAAGACAGCTATCGCGATTGCAGTGGCACTGGCTG	3	-34.6	Yes	Yes	Yes	No
	arcZ	wecH	TTCCCTGGTGTTGGCGCAGTATTCGCGCACCCCGGTCT	TTGATTATCCATGCGCTGCGCACCCGGGGAATTGAG	3	-29.9	No	Yes	No	Yes
	chiX	focA	TAATAATAAAAAAATGAAATTCCTCTTTGACGGGCCAATAGCGATATTGGCCATTTTTTT	TCCTGGCAAACCTGATGGTATGTCTGGCAGTA	7	-15.9	No	Yes	No	No
	ryeA	ygdQ	GTTGCCTTGCCCTTTAAGAATAGATGACGACGCCAGGTTTTC	TCATTTTTTTGGCAGGGCTTTTTAGATGTTATTTGCATGGATAACC	1	-18.6	No	No	Yes	No
	arcZ	bamB	AAACAGTGCTGTGCCCTTGTAACTCATCATAATAATTTACGGCGCAGCCAAGA	CCAGACTGAACCGGTTGCCGCTGACGGCAAACTGCTGATCCAGGCAAA	1	-22	No	Yes	No	No
	gcvB	fecA	GTTGTTGTGTTTGCAATTGG	GCAACTGGACCATCACG	1	-5.5	No	No	Yes	No
	cyaR	gtrA	CTGAAAAACATAACCCATAAAATGCTAGCTGTACCAGGAACCACCTCCTTAGCCTGTGTAATCTCCCTTACACGGGCTTA	CTTATACACTGGGTGGTTTTTGGTG	9	-26.1	Yes	No	Yes	No
	spf	aceB	AGATGTTCTATCTTTCAGACCTTTTACTTCACGTAATCGGATTTGGCTGAATATTTTAGCCGCCCCAGTC	TGAGCTGGTGACGCATTTTACGCCACAACGCA	1	-13.5	No	No	Yes	No
	cyaR	yifE	TGAAAAACATAACCCATAAAATGC	ATAACTAGCTCGGTCAAAGAATTAGGAGCGTGCAGGA	1	-3.9	No	No	Yes	No
	arcZ	tnaC	AAGATTTCCCTGGTGTTGGCGCAGTATTCGCGCACCCCGGTCTAGCCGGGGTCATTTTTT	TTCAATATTGACAACAAAATTGTCGATCACCGCCCTTGATTTGCCCTTCTGTAGCCATCACCAGAGCCAAACCGATTAGATTC	119	-33.9	Yes	Yes	Yes	Yes
	arcZ	gspC	TTTCCCTGGTGTTGGCGCAGTATTC	CTTGAGTCAGCGCCGGGAACGTTTATTAGAAA	3	-24.1	No	No	Yes	No
	gcvB	ydeN	ATAGTGATTAATGTAGCA	GAGGTAAATCAGGAGAAGTTTAACAATATCAAGAAAGCACTAAGCGAAG	1	-5.2	No	No	Yes	No
	gcvB	aceE	TTTTATCGGAATGCGTGTTCTGGTGAACTTTTGGCTTACGGTTGTGATGT	CGATGCAGATAAAGTTAACCCGCGTCTGGCGT	1	-16.8	No	Yes	No	No
	spf	mtr	CGTAATCGGATTTGGCTGAATATTTTAGCCGCCCCAGTCAG	GACGACTCGGCTGTGGGCCGCTTGAAAACGGCATTGCTGACCTTTGCCCCGCCAGTTGTGGGGGGGCTGTTGT	1	-29.2	No	Yes	No	No
	spf	gadX	TACTTCACGTAATCGGATTTG	TGAGTGTAGAATGCAACGTGCTTTG	1	-5.8	No	No	No	Yes
	chiX	lptD	AAGTGACGGCATAATAATAAAAAAATGAAATTCCTCTTTGACGGGCCAATAGCGATATTGGCCATTTTT	CTAACAAGCAAGCCGACTCTATG	1	-8.4	No	Yes	No	No
	chiX	rplT	GCGATATTGGCCATTTTTTTA	TAAGATCCTGGCTGATATCGCAGTATT	1	-22	No	No	No	Yes
	gcvB	tpiA	TGTGATGTTGTGTTGTTGTGTTTGCAAT	TCTGAAAGCTGACGCCTTCGCAGTAATCGTTAAAGCTGCAGAA	1	-13.9	No	No	Yes	No
	arcZ	ompC	TTCCCTGGTGTTGGCGCAGTATT	TGAACTTTGCTGTTCAGTACCAGGGTAAAAACG	2	-24	Yes	Yes	No	No
	gadY	ynaJ	ACGGTTTATTAGTCTGGAGAC	TTCTCTTTGGTTTGTTGGCG	1	-6.1	No	No	No	Yes
	spf	lolE	TTTCAGACCTTTTACTTCACGTAATCGGATTTGGCTGA	CCAGTAAAGGCAGTACATTAAAACAAGGAGCGGC	1	-6.9	No	No	Yes	No
	gcvB	tnaC	GGAATGCGTGTTCTGGTGAACTTTTGGCTTACGGTTGTGATGTTGTG	CCCTTGATTTGCCCTTCTGTAGCCATCACCAGAGCCAAACC	12	-27.3	No	No	Yes	No
	arcZ	nsrR	ATTCGCGCACCCCGGTCTA	TGATGTGGTGCGCGAGCTGGAGCC	1	-20.6	No	No	No	Yes
	mgrR	ompX	CGATTCGTTATCAGTGCAGGAAAATGCCTGTTAGCGTAAA	AAACTTAGGACTTATTTGAATCACATTTGAGGTGGTTA	1	-9.6	No	No	Yes	No
	rybB	rimP	CATTTTGTGGAGCCCATCAACCCCGCCATTTCG	ATGTCTTGGGGGTGGGCTTGTCCAC	1	-23.5	No	No	Yes	No
	ryjB	ydiV	GGGATCGCAGAAGGGTTATTGCTCTTTGCCGGGGATAAGCGCTCT	TTCAGCGATAACCCTTCTGTTTGC	1	-28.5	No	No	Yes	No
	gcvB	yedW	TGTGATGTTGTGTTGTTGTGTTTGCAATTG	GTTCGGGCACAATTAAGGCAACATCACGCTT	2	-27.9	No	No	No	Yes
	mgrR	tnaB	GATTCGTTATCAGTGCAGGAAAATGCCTGTTAGC	TCTTTATGGCTTTGCCGGTGTGTCTGG	1	-11.4	No	No	Yes	No
	micA	gatY	TGAAATTTTGGCCACTCACGAGTGGCCTTTTTCTT	ATGAAAATGTACGTGGTATCGACAAAGCAGATGCTGAACAACG	1	-8.7	No	No	Yes	No
	chiX	ftsI	CATAATAATAAAAAAATGAAATTCCTCTTTGACGGGCCAATAGCGATATTGGCCATTTTTTTA	TGCGTTCTCTTCGCGTTCAGCAAGTTTCCACCTCCCGCGGCATGATTACTGACCGTTCTG	1	-11.8	No	No	Yes	No
	dsrA	ybeD	ATCAGATTTCCTGGTGTAACGAATTTTTTAAGTGCTTCTTGCTTAAGCAAGTTTCATCCCGACCCCCT	CAGTAAAAAACTCCCGCCTTCTGGCGGGAGTTGCTATTTAATTACGTTACGCCGGAGCTGACAT	12	-36.1	No	Yes	Yes	Yes
	arcZ	yncL	AAACAGTGCTGTGCCCTTGTAACTCATCATAATAATTTACGG	ATGAGATTTGGCTGGTTTATTTGATGTAGTGATTTTGCA	1	-11.3	No	No	Yes	No
	gcvB	lpoB	TTACCCTGTCTGTCCATAGTGATTAATGTAGCACCGCCT	TGGGGCTGACGGGGTGACTG	1	-23.4	No	No	Yes	No
	sdsR	kdgR	AAGCCTGCATTAATGCCAACTTTTAGCGCACGGCTCTCTCC	CTGTATCTTCCGTGCTAAAAGTTTTTGGCATTTTGCAGGCGCTGGG	10	-38.6	Yes	No	Yes	Yes
	omrB	melB	CCCAGAGGTATTGATAGGTGAAGTCAACTTCGGGTTGAGC	TTGTCTTTGTTTGCGTGACCTACATCCTCTGGGGCATGA	2	-26.6	No	No	Yes	No
	gcvB	aceK	TTGCAATTGGTCTGCGATTCAGACCATG	TGACCTCCGGTGCGCAGCAGCGTTTCGAACAGGCCGACTGGCAT	1	-16.7	No	No	No	Yes
	gcvB	rlmH	ATGTTGTGTTGTTGTGTTTGCAA	AAGAGGGTGAGCAGATGTTG	1	-7	No	Yes	No	No
	cyaR	msrB	GCTGAAAAACATAACCCATAAAATGCTA	TAATGTGAGCACGATTAAAGTGAGATGTGAGCAAATGGCTAATAAA	1	-6.8	No	No	Yes	No
	cyaR	yadL	GCTGAAAAACATAACCCATAAAATGCTAG	GGTCGTGGAAAAAAATA	1	-5.4	No	No	Yes	No
	micF	dgoR	TTTCTGAATGTCTGTTTACCCCTATTTCAACCGGATGCCTCGCATTCGGTTTTTTTT	TACGCTGGGTAAACAGATCGTTCACG	3	-24.2	No	No	No	Yes
	cyaR	yfdY	GCTGAAAAACATAACCCATAAAATGCT	ACGGGGATATTTATGTTTCTTGCCCCGGCTTGTGGCTTGATGATTCGCTTTATGGTGGGGTAT	2	-11.2	Yes	No	Yes	No
	gadY	sbmA	TCCCGGTCCCCTATGCCGGGTTTTTTTTA	TCTTCTGGCAAGCCGGTGGGGGTGACTGGGTGGCGCGTATCACCGGCGCTTCCGGGCAGATCCCGATTAGCGCCGCGCGTTTC	1	-30.8	No	No	No	Yes
	gadY	iscS	TTATTAGTCTGGAGACGGCAGACTATCCTCTTCCCGGTCCCCTA	ACAAAGCGGTACTGGATACCTGCCGTCAGCTGG	2	-25.7	No	No	Yes	No
	cyaR	rimP	ACCACCTCCTTAGCCTGTGTAATCTCCCTTACACGGGCTTATTTTTT	TTTTTTTATGTCTTGGGGGTGGGCTTG	7	-16.5	Yes	Yes	Yes	No
	cyaR	ynbD	CCAGGAACCACCTCCTTAGCCTGTGTAATCTC	TTGTGTACCGATGCTGGATCTGGTGGTTCCGGAAGAG	1	-25.2	No	Yes	No	No
	spf	ilvL	TAGGGTACAGAGGTAAGATGTTCTATCTTTCAGACCTTTTACTTCACG	AGGCATTCCTTCGAACAAGATGCAAGAAAAGACAAAATGACAGCCCTTCTACGAGTGATTA	2	-11.3	No	Yes	No	Yes
	cyaR	dcuA	AAATGCTAGCTGTACCAGGAACCACCTCCTTAGCCTGTGTAATCT	TGGTTTTGCAGGCGGATTGGGGGTGCTGGTTCTTGCCGC	6	-33.5	Yes	Yes	Yes	No
	spf	panE	TAATCGGATTTGGCTGAATATTTTAGCCGCCCCAGTCAGTAATGA	AGTGGTTGCGGGTGAGGAGGAACAATGAAAATTAC	1	-14	No	Yes	No	No
	cyaR	ychE	TGAAAAACATAACCCATAAAATGC	ATTATCTTGTGGATCTCGCTTTTTCTCGGCGACACGATTCT	1	-8.2	No	No	Yes	No
	spf	alsE	TACTTCACGTAATCGGATTTGGCTGAATATTTTAGCCGCCCCAGTCAGT	ATCGACAGCCATGCCGATTACTT	3	-22.1	No	No	Yes	No
	micA	rbsD	AGAGATGAAATTTTGGCCACTCACGAGTGGCCTTTTTCTT	CCATAATCCGCAACTCCACGAAACGTTGCTCACTCACCTTGAGCAGCTGCAAAAACACCAGGGAAATACCA	1	-16.7	No	No	Yes	No
	sdsR	fabB	AAGCCTGCATTAATGCCAACTTTTAGCGCA	GCCTGATTGCAGGTTCCGGCGGCG	3	-16.6	No	No	Yes	No
	arcZ	clpS	TTCCCTGGTGTTGGCGCAGTATTCGCGCACCCCGGTCTA	ATTGATGCTCGCTGTTCACTACCAGGGGAAGGCCATT	3	-25.8	Yes	Yes	Yes	No
	arcZ	yphC	TTTCCCTGGTGTTGGCGCAGTATTCGCGCACCCCGGTCTAGCCGGGGTCATTTTTTA	AATTCGACCGTCGATCTGCGGGAAGTTGCGGTGCCGACGCCGGGGAT	4	-50.9	Yes	No	No	Yes
	arcZ	yfaE	ATTCGCGCACCCCGGTCTA	ATTCAGCCGGGGGAAATTTTGCCCTGTTGTTGCCGGGCAAAAGGCGATATTGAAATCG	2	-17.7	No	Yes	No	No
	arrS	gadB	GTAATCCGATTTAAATATCGAGTCTCCTTGTTTCGACTTAAGCTGGCAATTGGATTGCCAGCTTTCTTTTA	ACTCGATTCACGTTTTGGTGCGAAGTCTATTTCCACTAT	1	-13.1	Yes	No	Yes	No
	omrB	yicG	ATTGATAGGTGAAGTCAACTTCGGGTTGAG	CCGAAGCCATGACGGGGGCGCTGGC	1	-15.9	No	No	Yes	No
	cyaR	tus	CTGAAAAACATAACCCATAAAATGCTAGCTGTACCAGGAACC	GTGATGAAGTCCTGGCACAGCTGGA	2	-24.5	Yes	No	Yes	No
	omrA	pyrH	CTTGCACCAACCTGCGCGGATGCGCAGGTT	TGAACAAACCGGGTGCGCTGCGCCGTGTGGTAATGGG	1	-27.1	No	Yes	No	No
	cyaR	pitB	TGAAAAACATAACCCATAAAATGC	ATACACAGGGCTTTTGTTATTGCTTGCTCTG	1	-7.5	Yes	No	No	Yes
	arcZ	priA	TTCCCTGGTGTTGGCGCAGTATTC	ATCATCCGATTGGCGATGTGCTGTTTCATGCCTTGCCGATTTTACTACGCCAGGGG	2	-26.2	No	No	No	Yes
	ffs	yciS	CGCGTGTGCCGGGATGT	TTCCCTGGCGCGCGCTGAACG	2	-25.9	No	No	No	Yes
	omrA	ytfK	AGAGGTATTGATTGGTGAGATTATTCGGTACGCTCTTCGTACCCTGTCTCTTGCACCAACCTGCG	ATAGTTGGGCCGATTGTGGCACCGCACAGGCGTAATACTCAGCAGGAGATAACAATGAAAATTTTCCA	1	-27	No	No	Yes	No
	omrB	minE	ATTGATAGGTGAAGTCAACTTC	GATATTCTTGAGGTCATTTGTAAATACGTACAAA	1	-9.7	No	No	No	Yes
	micA	ftsA	GCATTTGTTATCATCATCCCTGAAT	TCATTGGCGTGGGCAGCTGCCCG	1	-9.1	No	No	No	Yes
	gcvB	ybeD	TTGTTGTGTTTGCAATTGGTCTGCGATTCAGACCATGGTAGCAAAGCTACCTTTTTTCAC	TTATGGGGCAGGCGTTACCTGAGCTGGTTGATCAGGTGGTTGAAGTGGTACAGCGCCATGCGCCA	1	-28.4	No	Yes	No	No
	gcvB	asnB	ATTCAGACCATGGTAGCAAAGCTACCTTTTTTCACTTCCTGTACATTTACCCTGTCTGTCCAT	CTTCACTGTACAGGAAGGTCTGG	5	-22	No	Yes	Yes	No
	arcZ	sbcD	GATTTCCCTGGTGTTGGCGCAGTATTCGCGCACCCCGGTCTAGCCGGGGTCATTTTTTA	CATGCTTTTTCGCCAGGGAACCGTT	166	-21.7	No	Yes	Yes	Yes
	omrA	ykfB	AGATCCCAGAGGTATTGATTGGTGAGATTATTCGGTACGC	TTTGACTTCATCAGCAATATCTCTGAGG	2	-25.9	No	No	Yes	No
	arcZ	ldcC	CCCTGGTGTTGGCGCAGTA	CGCTCTTACGATCTCAAC	1	-6	No	No	Yes	No
	chiX	opgG	AAAGTGACGGCATAATAATAAAAAAATGAAATTCCTCTTTGACGGGCCAATAGCGATATTGGCCATTTTTT	TTGCTTGACTCGCCGCGTGCGA	1	-12.2	No	Yes	No	No
	arcZ	exuT	TTTCCCTGGTGTTGGCGCAGTATTCGCGCACCCCGGTCTA	TAAACATCCGCGCGACCAGAAGCATCTGACCGATGAAGAACGCGACTATATTATTAATGGTCAGGAAGCCCAGCACCAGGTGAGCACGGCG	1	-37.3	No	Yes	No	No
	arrS	bamD	GTAATCCGATTTAAATATCGAGTCTCCTTGTTTCGACTTAAGCTGGCAATTGGATTGCCAGCTT	ATCTGGTGGCAGCCGCCACACTAAGCCTGTTTT	1	-19.2	No	No	Yes	No
	cyaR	minD	CCTCCTTAGCCTGTGTAATC	ATTGTTGTTACTTCGGGCAAAGGGGGTGTTGGT	3	-23	No	No	Yes	No
	arrS	recA	CCGATTTAAATATCGAGTCTCCTTGTTTCGACTTAAGCTGGCAATTGGATTGCCAGCTTTCTTTT	ATTTTTAATCGTCTTGTTTGATACACAAGGGTCGCATCTGCGGCCCTTTTG	1	-17.2	No	Yes	No	No
	gcvB	tnaC	CCCTGTCTGTCCATAGTGA	ACCGCCCTTGATTTGCCCTTCTGTAGCCATCACCAGAGCCA	1	-4.9	No	No	Yes	No
	cyaR	yeaQ	CTGAAAAACATAACCCATAAAATGCTAGCTGTACCAGGAACCACCTCCTTAGCCTGTGTAATC	ATCATGCCAGGTAAAGATGGAGGTGGATTCTTTATGACTATCCTGCT	2	-29.7	Yes	No	Yes	Yes
	cyaR	luxS	GCTGAAAAACATAACCCATAAAATGCTAGCTGT	AAAAAAATTACCGGAGGTGGCTAAATGCCGTTGTTA	1	-9.3	Yes	No	Yes	No
	cyaR	ydgK	CTGAAAAACATAACCCATAAAATGCTAGCTGTACCAGGAACCACCTCCTTAGCCTGTGTAATCTC	TATTGGAGGCTGGTTGCTTGGCC	2	-22.9	No	Yes	Yes	No
	chiX	lnt	AAGTGACGGCATAATAATAAAAAAATGAAATTCCTCTTTGACGGGCCAATAGCGAT	TTGTCGCTGTATACCGGACTGTTTGCTGGCGTGCTGTCGCGTCTGTGGCCGAAAACCACCTGGCTGCG	1	-28.5	No	Yes	No	No
	mgrR	rsxE	GATTCGTTATCAGTGCAGGAAAATGCCTGT	CAGGAAAATACCTGATT	1	-10.9	No	Yes	No	No
	sdsR	mak	AAGCCTGCATTAATGCCAACTTTTAGCGCACGGCTCTCTCCCAAGAGCCAT	TTGAAAAAAATAAGGAGAGTACCGTGCGTATAGGTATCGAT	8	-29.2	No	No	Yes	Yes
	gadY	ygiN	CCGTGCCAACAGGGAGTGTTATAACGGTTTATTAGTCTGGAGAC	TTCTGCAGCCAGGGATTTAATCC	1	-9.1	No	No	No	Yes
	dsrA	tmcA	ATTTCCTGGTGTAACGAATTTTTTAAGTGCTTCTTGCTT	AGTTTTGGTTACACCGGGGAG	1	-22.8	No	Yes	No	No
	arcZ	hdeB	AGCCGGGGTCATTTTTTA	AAAAGCAATGACCCCGGTTGCATGGTGGATGCTGCATGAAG	2	-23.9	No	No	No	Yes
	isrC	ompX	AGCTAATAATAACCTTTGT	CTGCAAGCTCTGGTGACTACAACAAA	1	-3.7	No	No	Yes	No
	gcvB	rbsK	ATTTACCCTGTCTGTCCATAGTGATTAATGTAGCACCGCCTAATT	ATTTTTAGACAGGCAGAGGTGACGC	7	-21.4	No	Yes	Yes	No
	chiX	clpB	AAAGTGACGGCATAATAATAAAAAAATGAAATTCCTCTTTGACGGGCCAATAG	AGTAGCAACTTTGATCCGTTATGGGAGGAGTTATGCGTCTGGATCGTCTTAC	2	-27.5	No	Yes	No	No
	gcvB	pck	ATTTACCCTGTCTGTCCATAGTGATTAATGTAGCACCGCCTAAT	ATACTTTCTGGTGGGCAGACAAAGG	5	-19	No	No	Yes	No
	spf	hda	TTTCAGACCTTTTACTTCAC	GTTACATCTATCTCTGGGCAC	1	-4.9	No	No	Yes	No
	gadY	insC1_6	TGGAGACGGCAGACTATCCTCTTCCCGGTCC	GCGCACGCGCCCTTATTGCCCGGGGATGGGGAGTAAGCTTAGTCAGCCGTTGTCTCC	3	-37	No	No	Yes	No
	gadY	glgB	TTCCCGTGCCAACAGGGAGTGTTATAACGGTTTATTAGTCTGGAGACGG	ATTTTTTCCGCTATCAGTTGGCTGTTGTCTGGCAT	1	-18.8	No	No	No	Yes
	chiX	rbbA	GCATAATAATAAAAAAATGAAATTCCTCTTTGACGGGCCAATA	CGGCCCGCTGTATGGTCGGGCTGATTGGCCCGGACGGCGTCGGGAAGTCGAGCTTGTTGTCGTTGATTTCCGGTGCCCGCGT	2	-25.2	No	No	Yes	No
	gadY	nrdB	CTGGAGACGGCAGACTATCCTCTTCCCGGTCC	TTGGATCTGCCGTTCCAGACGCG	1	-24.6	No	No	Yes	No
	gcvB	ypjA	ATTTACCCTGTCTGTCCATAGTGA	CAATATGGGCGGACGGGAGATCGTC	2	-25.4	No	No	Yes	No
	cyaR	preA	GCTGTACCAGGAACCACCTCCTTAGCCTGTGTAAT	ATGGGAGGAGCTGGCGCGCCTGGTGCAAGAAGCT	1	-29.7	No	No	Yes	No
	cyaR	manZ	GCTGTACCAGGAACCACCTCCTTAGCCTGTGTAATCTCCCTTACACGGGCTTATTTT	ATCGATATCGTTAAAGATATGGGTGGTGGCTTCCTGCA	1	-24.5	No	No	Yes	No
	gcvB	yddB	CGGTTGTGATGTTGTGTTGTTGTGTTTGCAA	AACGGCAACACGCATTACACCAGT	3	-25.7	No	Yes	No	No
	arcZ	dadX	GTATTCGCGCACCCCGGT	TTTTGACTGGGTTCGGCCTGGCATTATTTTGTATGGC	1	-11.8	No	No	Yes	No
	gcvB	rmf	TGTGATGTTGTGTTGTTGTGTTTGCAATTGGTCTGCGATTCAGACCATGGTAGCAAAGCTACCTTTTTTCACTTCCTGTACATTTACCCTGTCTGTCCATAGTGATTAATGTAGCACCGCCTAA	AAGGTCACAATGGCTGGGAGGCTGGCGAGAAGCCATGGCGGACAGGGTAGTAATGGCCTGA	14	-41.8	Yes	No	Yes	Yes
	dsrA	nlpD	CATCAGATTTCCTGGTGTAACGAATTTTTTAAGTGCTTCTTGCTTAAGCAAGTTTCATCCCGACCCCCTC	CACCGGAACCAGTTCAACACGCTTGCATTTTGAAATTCGTTACAAGGGGAAATCCGTAA	124	-37.8	Yes	Yes	Yes	Yes
	gadY	yjbB	GGGAGTGTTATAACGGTTTATTAGTCTGGAGACGGCAGACTATCCTCTTCCCGGTCCCCTATGCCGGGTTTTTTTTATG	TAACGCTGCTTCACCTGCTTTCTGCCGTCGCCCTGCTGGTCT	78	-27.5	Yes	Yes	Yes	Yes
	gcvB	add	TTTTCACTTCCTGTACATTTACCCTGTCTGTCCATAGTGATTAATGTAGCACCGCCT	CCCGGCGTACAGGGAGTGGATA	1	-22.9	No	No	Yes	No
	gcvB	ftsB	GTGATTAATGTAGCACCGCCT	GTTTTTCAGGGGGCAGGATGGGTA	3	-8.4	No	Yes	No	No
	micA	tolB	AAAGACGCGCATTTGTTATCATCATCCCTGAATTCAG	AATCTACAGCTCTTCTCAGGGGATGGGATCCGTGCTGAATTTGGTTTCTACAGATGGGCGTTTCAAAGCGCGTCTTCCGGC	4	-30.2	Yes	No	Yes	Yes
	chiX	atpI	AAGTGACGGCATAATAATAAAAAAATGAAATTCCTCTTTGACGGGCCAATAGCGATATTGGCCATTTTTTTA	ACTGGTGGTGGCGTTGGCGGTTTTAAAGGCGGTATTCTTGCCGCTGATCGT	1	-27.7	No	Yes	No	No
	gcvB	yfjH	ACTTCCTGAGCCGGAACGAAAAGT	CTTACCAAGGAAACGTT	1	-5.7	No	Yes	No	No
	cyaR	lysP	GCTGTACCAGGAACCACCTCCTTAGCCTGTGTAATCTCCCTTACACGGGCTTATTTTT	ATGAGCTGGTGGTTCCCGGAT	1	-23.9	Yes	No	No	Yes
	cyaR	ftnA	CTGAAAAACATAACCCATAAAATGCTAG	TTGCTGAATATTCCTCACTTGATGAATTATTCCAGGAAACCTA	1	-2.9	No	Yes	No	No
	chiX	chbC	TAAAGTGACGGCATAATAATAAAAAAATGAAATTCCTCTTTGACGGGCCAATAGCGATATTGGCCATTTTTTT	ATTAATTAACAACGTTTTTCTAAGCTTTGGGGAGGGGTCGTTTTTTT	18	-20.8	No	Yes	Yes	Yes
	spf	fliY	AGAGGTAAGATGTTCTATCTTTCAGACCTTTTACTTCAC	CATTGATGGGTGTGATGGCCGTGGCGCT	1	-13.8	No	Yes	No	No
	cyaR	yqaB	TGAAAAACATAACCCATAAAATGC	AATTTTTGATATGGATGGC	1	-5.5	Yes	No	Yes	Yes
	spf	metK	GGGTACAGAGGTAAGATGTTCTATCTTTCAGACCTTTTACTTCACG	GTCGTGAACATTTCCCGTGGGAAAAAACCGACAAAGCGCAGCTGCTGCGCGATGCTGCCGGTCTGAAGT	1	-18.6	No	Yes	No	No
	omrA	cusS	TGAGATTATTCGGTACGCTCTTCGTACCCTGTCTCTTGCACCAACCTGCGCGGATGCGCAGGTTTTTT	AAGCCATTTCAGCGCCCGTTTTCGCTGGCAACCCGCCTGACCTTTTTTA	1	-18.6	No	No	Yes	No
	mgrR	dam	GATTCGTTATCAGTGCAGGAAAATGCCTGTTAGCGTAAAA	AAGTGGGCAGGGGGCAAGTATCCCCTGCTTGAT	1	-22.5	No	No	No	Yes
	mgrR	rpsJ	CGATTCGTTATCAGTGCAGG	GTCGAGACTGCCAAGCGCACTGGTG	1	-12.9	No	No	Yes	No
	oxyS	rplY	GTCACTGCCCGTTTCGAGAGTTTCTCAACTCGAATAACTAAAG	AGCTAAAGCTGAATTCTACAGCGAAGTTCTGACCATCGT	1	-11.7	No	Yes	No	No
	gcvB	rmf	ACCCTGTCTGTCCATAGTGA	GAGGGAAACGAGGCATGAAGAGACAAAAACGAGATCGCCTGGAACGGGCACATCAACGTGGTTATCAGGCCGGC	1	-15	Yes	No	No	Yes
	arcZ	dhaR	TTCCCTGGTGTTGGCGCAGTATTC	TGAAAGCCAGCACCAGTTTATTGATGCGGTGATAACCCTTAAACCGATAAT	3	-22	No	No	Yes	Yes
	arrS	dinG	AATCCGATTTAAATATCGAGTCTCCTTGTTTCGACTTAAGCTGGCAATTGGATTGCCAGCTTTC	CCACGCCGTCGGCGGCGTTAATGATGTGAGTCAGGTAAGGAGTCGTAAATGGACTATCGCAAAATCATTA	1	-27.7	No	No	Yes	No
	chiX	pcnB	TAATAATAAAAAAATGAAATTCCTCTTTGACGGGCCAATA	TAATGTTTGGCCCGGAGA	2	-17.1	No	No	Yes	No
	gadY	ygiM	TTATTAGTCTGGAGACGGCAGACTATCCTCTTCCCGGTCCCCTATGCCGGGTTTTTTTT	TTTACTCGCACTTAGCGCGACTGCCGTCTCACACGCTG	7	-28.4	No	No	Yes	Yes
	cyaR	umpG	CTGAAAAACATAACCCATAAAATGCTAGC	ATCAAAGGTATTCGCGTGACGCGCTGCGGTACACG	1	-6.3	No	No	No	Yes
	cyaR	recG	GCTGAAAAACATAACCCATAAAATGCTAGC	CCAATGACACGCTGAAAAATAAA	5	-3.2	No	No	Yes	No
	cyaR	yhhZ	CTGAAAAACATAACCCATAAAATGCT	TGACAGTAACGGGAGAACAA	1	-5.1	No	No	No	Yes
	cyaR	lexA	GCTGAAAAACATAACCCATAAAATGCTAG	TGCTGATTTCCTGCTGCGCGTCAGCGGGATGTCGATG	1	-8.9	No	No	Yes	No
	gcvB	yjaG	GTTCTGGTGAACTTTTGGCTTACGGTTGTGATGTTG	AGACCTCCATCACGACCGTTGCGATGCTGGAAATGACTCA	2	-26.5	No	No	No	Yes
	cyaR	mdtL	CTGAAAAACATAACCCATAAAATGCT	GTTTGGTATCACGCTGATTTGCG	1	-2.8	No	No	No	Yes
	cyaR	ribF	GCTGAAAAACATAACCCATAAAATGC	TACAAGTAGTGCTGCGTAAAAAAATACGCAATGAGCAG	1	-4.1	No	No	Yes	No
	cyaR	nlpI	GCTGAAAAACATAACCCATAAAATGC	ACCTAAGTCTGGGGGATTTGGACAGCGCCACGGCACTGTTC	1	-12.4	No	No	Yes	No
	gcvB	narX	TTACCCTGTCTGTCCATAGTGATTAA	ATTGGACTGGCAGGGATGGC	1	-21.7	No	No	Yes	No
	arcZ	yebS	TTTACGGCGCAGCCAAGATTTCCCTGGTGTTGGCGCAGTATTCGCGCACCCCGGTCTA	TATGGGACCGGCTGCGTTTTATTTC	1	-20.5	No	No	Yes	No
	arcZ	yjfY	ATTTCCCTGGTGTTGGCGCAGTATTCGCG	TATGCACGCCAGCGCGGATATTTATCGCTAGCACCAGGTATAACCAACGAAACATTGCCATAGTTTGCTTTGCCCCCTTCG	121	-36.6	Yes	Yes	Yes	Yes
	cyaR	aceK	GCTGAAAAACATAACCCATAAAATGCTAG	ACTCCGTGTACTGTCGGTTATTTGACCACCGCTC	1	-8.5	No	No	Yes	No
	cyaR	acnB	GCTGAAAAACATAACCCATAAAATGC	AGTCCTGGGCGGATGCCGAATGGTTCCTGAATCGCCC	1	-6.4	No	No	Yes	No
	cyaR	hupB	GCTGAAAAACATAACCCATAAAATGC	GACAAGATTGCTGCAGGGGCTGATATCTCTAAAGCTGCGGCTGG	1	-7.2	No	No	Yes	No
	gcvB	hupB	GTGATGTTGTGTTGTTGTGTTTGCAATTGGTCTGCGATTCAGACCATGGTAGCAAAGCTACCTTTTTTCA	TCTCTAAAGCTGCGGCTGGCCGTGCGTTAGATGCTATTATTGCTTCCGTAACTG	1	-28.3	No	Yes	No	No
	arrS	secM	TAAATATCGAGTCTCCTTGTTTCGACTTAAGCTGGCAATTGGATTGCCAGCTTTCT	ATCTTGCATTACTGGATACGCTCAGCGCGCTGCT	1	-12	No	Yes	No	No
	gadY	kgtP	TTATTAGTCTGGAGACGGCAGACTATCCTCTTCCCGGTCCCCTA	AAAGGGAAGGGGATGCGTCTTTAGTGACG	2	-30.5	No	No	Yes	No
	cyaR	ybdR	GCTGAAAAACATAACCCATAAAATGCTA	ATAAAAAACAGATACCAG	1	-2.5	No	No	Yes	No
	cyaR	ptsP	GCTGAAAAACATAACCCATAAAATGCTAGCTGTACCAGGA	AGCTATTCTTTCTCAGTCGCAGTTGACTGCCTTGTTTGGGCAA	1	-15.8	No	No	Yes	No
	gadY	sucA	CAGGGAGTGTTATAACGGTTTATTAGTCTGGA	GCGAAGAGAAAAAACGCTTCTTAAGC	1	-11.3	No	No	Yes	No
	mgrR	ihfB	GTTATCAGTGCAGGAAAATGCCTGTT	AAAAGAGATGCTGGAGCATATGGCCTCGACTCTTGCGCAG	1	-15.6	No	Yes	No	No
	cyaR	sstT	GCTGAAAAACATAACCCATAAAATGCT	CTGTGTGAAAAGCTGAA	1	-7.4	No	No	Yes	No
	gcvB	degP	ACTTCCTGAGCCGGAACGAAAA	TTCTCCGTTCTGCCAGGAAGGTTCTCCGT	3	-22.4	No	No	Yes	No
	cyaR	ompX	GGAACCACCTCCTTAGCCTGTGTAATCTC	CACATTTGAGGTGGTTATG	1	-16.4	Yes	Yes	No	No
	gadY	amiB	GTTTATTAGTCTGGAGAC	AGTGATGTGGCACGTAAGCAAAACGCCAATTTCC	1	-7.5	No	No	No	Yes
	gadY	cysU	ATTAGTCTGGAGACGGCAGACTATC	AACTGATGTTTGCTGTCTCCTCCAGACGC	1	-27.6	No	No	No	Yes
	gcvB	rmf	ACTTCCTGAGCCGGAACGAAAAGTT	AGTAATGGCCTGATTCTGTCTCTTTAAAAAGAAACCTCCGCATTGCGGAGGTTTCG	1	-12.8	Yes	No	Yes	No
	gcvB	ilvL	ACTTCCTGAGCCGGAACGAAAAGTTTTATCGGAATGCGTGTTCTGGTGAACTTTTGGCTTACGGTTG	AAATGACAGCCCTTCTACGAGTGATTAGCCTGGTCGTGATTAGCGTGGTGGTGATTATTATCCCAC	1	-20.1	No	No	Yes	No
	mgrR	lysP	AAATCTATCCATGCAAGCATTCACCGCCGGTTTACTGG	ACAAGCTGATTAAAGGAACTCACTTCGTACGCTACAGCG	1	-6.6	No	Yes	No	No
	arcZ	dppA	AGCCGGGGTCATTTTTTA	ACCACCGAAGTGATCCCGGGCCTCGCTGAAAAGTGGGAAGTCAGCGAAGAC	3	-21.3	No	No	No	Yes
	gadY	ytfK	ACAGGGAGTGTTATAACGGTTTATTAGTCTGGAGACGG	TGTCAGTGATGTCCGAAGTTAACCGTCAGGTTATGCGTCTGCAAACA	1	-15.8	No	Yes	No	No
	cyaR	tsx	GCTGAAAAACATAACCCATAAAATGCTAGCTGTACCAGGAACCACCTCCTTAGCCTGTGTAATCTCCCTTACACGGGCTTATTTTTT	TACCGGCTGGGGTGGTTACCTGGTAGTAGGTTACAA	9	-37.9	Yes	Yes	Yes	No
	cyaR	yehU	AAATGCTAGCTGTACCAGGAACCACCTCCTTAGCCTGTGTAATCT	TTACTCGGTGGCCTGGTACACAG	1	-24.2	Yes	No	Yes	No
	sdsR	hemD	TTTAGCGCACGGCTCTCTCCCA	AATTACAAAATATTGCGGGCAAACGTGCGCTGATA	1	-21.7	No	No	No	Yes
	mgrR	gtrB	TATCAGTGCAGGAAAATGCCTGTTAGCGT	CATACATTGAAACCAAAAAACGCCCGAAATACATCATCAAGAGAGT	1	-5.9	No	No	No	Yes
	cyaR	gatB	GCTGAAAAACATAACCCATAAAATGCTAGCTGTACCAGGAACC	TTCTGGTATCGGTATCGAAGCATTACAAAATAAAATTCTGACTATCTTACAGGGGTGACCT	9	-20	Yes	No	No	Yes
	cyaR	ftsY	GCTGAAAAACATAACCCATAAAATGCTA	TAAGGCGGACGACTTTATA	1	-3.4	Yes	No	No	Yes
	chiX	ydgK	AAAGTGACGGCATAATAATAAAAAAATGAAATTCCTCTTTGACGGGCCAATAGC	CTTTTTCACCCGTGGAAGATGGCATAGCCGT	1	-21.9	No	No	Yes	No
	spf	oppA	GTACAGAGGTAAGATGTTCT	CAAGAGAAGTTTAGTAGCAGCTGGCGTTCTGGCTGCGCTAATGGC	1	-10.4	No	No	Yes	No
	arcZ	yfaY	TCCCTGGTGTTGGCGCAGTATTCGCGCACCCCGGTCTA	TCGATAACAAAAGCAGGAGATAACCATGTTAAAAGTGGAAATGTTATCCACCGGGGATGAAGTG	1	-24.3	Yes	No	No	Yes
	ryeA	dxs	TAAAGTCAGCGAAGGAAATGCTTCTGGCTTTTAACAGATAAAAAGAGACCGAACACGATTCCTG	TAAAGGCATGGTAGTGC	1	-9.8	No	No	Yes	No
	spf	yfeN	AGGGTACAGAGGTAAGATGTTCTATCTTTCAGACCTTTTACTTCAC	CGGGTTCTTCGACTGGGAAAACTTCTATAACGGTCGCCATAATA	1	-12.8	No	Yes	No	No
	arcZ	dcm	TTTCCCTGGTGTTGGCGCAGTAT	ATACAGCACCGGGAATGCC	1	-19.1	No	No	No	Yes
	arcZ	cysK	TTTCCCTGGTGTTGGCGCAGT	CGGTGCCAACATGATTTGGGATGC	1	-22.9	No	No	No	Yes
	arcZ	tar	TTTCCCTGGTGTTGGCGCAGTATTCGCGCACCCCGGTCTAGCCGGGGTCATTTTTTA	AAAAATATAAAAACTATTACACAGCGTTAACTGAACTGATTGATTATCTAGATTATGGCAATACTGGAGCTTATTTCGCTCAGCCAACCCAGGGAATGCAAAATGCAATGGGCGAAGCGTTTGCTCAGTACGCCCTCAGC	47	-43.3	Yes	Yes	Yes	Yes
	gcvB	cycA	ATTCAGACCATGGTAGCAAAGCTACCTTTTTTCACTTCCTGTACATTTACCCTGTCTGTCCATA	AACACAGACAGGTACAGGAAGAAAAAAACATGGTAGATC	33	-34.9	Yes	Yes	Yes	Yes
	chiX	gatY	AATTCCTCTTTGACGGGCCAATAGC	AGAACATTCGCCAGTGGGTGAACTTACCGCTGGTGCTGCATGGCGCGTCAGG	1	-19.9	No	No	Yes	No
	cyaR	fliD	GCTGAAAAACATAACCCATAAAATGCT	CGCGCTGGAAAACATCACCC	1	-3.2	No	No	Yes	No
	gadY	wzyE	AACAGGGAGTGTTATAACGGTTTATTAGTCTGGAGACGGCAGACTATCCTCTTCCCGGTCCCCTAT	TCTGCTTTGGGGCGATCTTCAATATGATCGTGCTGGCGCGTGAAGGGCTGGATTCGTTTGTCTCACGCGTGGTCTTTTTTATCGTG	1	-36.1	No	No	No	Yes
	sroH	malM	ATGTTCTCATCTTCCAGGATGCAGC	TTTATCAGCAGTGTAAAAGG	1	-4.3	No	No	Yes	No
	chiX	bamE	AAGTGACGGCATAATAATAAAAAAATGAAATTCCTCTTTGACGGGCCAATAGC	ACTGCTCGGGCCCGAAAAGGAATCAAATCACTATGCG	1	-21.9	No	No	Yes	No
	mgrR	hdeB	ATCTATCCATGCAAGCATTCACCGCCGGTT	TCTGAATCCAAAAGCAATGACCCCGGTTGCATGGTGGATGC	1	-21.8	Yes	No	Yes	No
	cyaR	yagG	CAGGAACCACCTCCTTAGCCTGTGTAATCTC	GATTGGCGGGGCGGTGGTGGGCTGG	1	-24.4	No	No	Yes	No
	gcvB	kgtP	TTGTTGTGTTTGCAATTGGTCTGCGATT	GCAAACTGACAAGTAGTGATACTCGTCGCCGCATTTGGGCGATTG	1	-11.9	Yes	No	Yes	No
	omrB	tnaA	GCACATGAATTACACCAGCCTGCGCAG	TTCCGACTCACCAGGGCCGTGGC	1	-9	No	No	Yes	No
	ffs	treB	GCCAAGGCAGATGACGCGTG	ATGTCATCTGCCATGGGGCTTTA	2	-24.1	No	No	Yes	No
	gcvB	ygeV	TGTTCTGGTGAACTTTTGGC	GTTTCGAAACTTCTGGAG	1	-5.5	No	No	No	Yes
	gcvB	prpR	TTACCCTGTCTGTCCATAGTGATTAATGTAGCACCGCCT	CTTTGCGGTGCGCTATGGCACATCCACCACGGCTTAAT	2	-24.1	No	No	Yes	No
	gcvB	trg	GGTTGTGATGTTGTGTTGTTGTGTTTGCAATTGGTCT	CCTGCATTCTAGGCGGT	1	-9.1	No	No	Yes	No
	gcvB	hflX	AACGAAAAGTTTTATCGGAATG	CGACGGGTGCTTCGGTCGTTCTTTTTGACCATG	1	-10.7	No	No	Yes	No
	cyaR	citA	CTGTACCAGGAACCACCTCCTTAGC	CTGTCGTGGTTCCTGGCCGCG	1	-22	Yes	No	No	Yes
	cyaR	mscK	CTGAAAAACATAACCCATAAAATGCTAGCTGTACCAGGAACC	TTCAACCTGCTGCTGATTGCCTTCCTGGTATGGCCGATGTG	2	-21.3	Yes	No	Yes	No
	cyaR	gntU	AAACATAACCCATAAAATGCTAGCTGTACCAGG	AAAGACAAAGTGATGGA	1	-4.8	Yes	No	No	Yes
	cyaR	luxS	CCACCTCCTTAGCCTGTGTAAT	GTTCAGAAAATTTTTAAAAAAATTACCGGAGGTGGCTAAATG	1	-16.4	Yes	No	Yes	No
	glmZ	tnaA	TGTCATACAGACCTGTTTTAACGCCTGCTCCGT	GTAGGTCTGTATGACGGC	1	-24.2	No	No	No	Yes
	chiX	efp	AAAGTGACGGCATAATAATAAAAAAATGAAATTCCTCTTTGACGGGCCAATAGCGATATTGGCCATTTTTTT	ACCGGTACTCGCGTAGAAAAAACCTTCAAATCTAC	1	-16.2	No	Yes	No	No
	chiX	cspD	GACGGCATAATAATAAAAAAATGAAATTCCTCTTTGACGGGCCAATAGC	CAGTGTTATTGTGCCCGTCGAA	5	-24.1	No	No	Yes	Yes
	arcZ	ispG	AACAGTGCTGTGCCCTTGTAACTCATCATAATAATTTA	ATCAAAGTCGGTTTCGATATTTTGAAATCGCTGC	1	-6.2	No	No	No	Yes
	chiX	yddA	GACGGCATAATAATAAAAAAATGAAATTCCTCTTTGACGGGCCAATAGCGATATTGGCCATTTTTTTA	CATTGTGATCGGTGGAACTTTATTTACCCATAAGGTGGGTAAACGTATT	1	-17.2	No	No	Yes	No
	gcvB	yfbP	TACATTTACCCTGTCTGTCCATAGT	ACTTATTTTGCGCAGAGAAAACCG	1	-7.4	No	Yes	No	No
	cyaR	xseB	TAACCCATAAAATGCTAGCTGTACCAGGA	AAATTCTGCTGTCTGACAA	1	-3.9	No	No	No	Yes
	gcvB	ileS	ACGAAAAGTTTTATCGGAATGCGTGTTCTGGTGAACTTTTGGCTTA	CGGCAACGGTCACCTGCACAAAGGCGCGAAGC	1	-18.8	No	No	Yes	No
	mgrR	miaA	GATTCGTTATCAGTGCAGG	CTTCAGGTTTTGAAGCAGAAGTCCGGGCGCTTTTTGCCCGAGGAGATT	1	-8.5	No	No	Yes	No
	oxyS	rpsE	CTCGAATAACTAAAGCCAACGTGAACTTTTGCGGATCTCC	AACGGTCGCGTTGGTTTTGGTTACG	8	-26.2	No	Yes	Yes	No
	spf	rfbC	GTAGGGTACAGAGGTAAGATGTTCTATCTTTCAGACCTTTTACTTCAC	AACTACAAACTATTATCATCCTGAAAGCGATTGTGGAATATGTTGGAATGATGAAC	1	-18.4	No	Yes	No	No
	arcZ	ligA	TTCCCTGGTGTTGGCGCAGTATTCGCGCACCCCGGTCT	TTTTAGTCAGTGCCGCGACCCGTGGCGATGGCACCACCGGGGAAGATA	5	-35.4	Yes	No	Yes	Yes
	spf	insG	GTAGGGTACAGAGGTAAGATGTTCTATCTTTCAGACCTTTTACTTCACG	AAGGATCAGTTGACCGATCCAGTGGCTGTGTAAGAATCCGGAAACGCTCACTTGTTTCCGGATTTTTTT	1	-15.3	No	Yes	No	No
	arcZ	efeB	TTCCCTGGTGTTGGCGCAGTATTCGCGCACCCCGGTCTA	TTTGCGCCAACACCCAGGA	1	-29.2	No	No	No	Yes
	rdlB	minC	TCTGTTGTCAGGTTTTACCTCTCAACGTGCGGGGGTTTTCTCTT	ATCGCTCAGGCCCCCGCATTTT	2	-22.2	No	Yes	No	No
	cyaR	secG	CTGAAAAACATAACCCATAAAATGCT	TTATGTATGAAGCTCTTTTAGTA	1	-4	Yes	No	Yes	No
	ryeA	hemG	GAAGGAAATGCTTCTGGCTTTTAACAGATAAAAAGAGACCGAACACG	CGACGCGGCTGAATTCGATGCCGAGCGCCTTTTACTCCGTGAATCTGGTGGCGCGCAAACCGGAGAAGCGT	1	-16.3	No	No	Yes	No
	mgrR	lrhA	GGTTTACTGGCGGTTTTTTT	TATGAGCCGCCAGTAAGTGATAATATATGAT	1	-22	No	No	Yes	No
	spf	ygbN	GTAGGGTACAGAGGTAAGATGTTCTATCTTTCAGACCTTTTACTTCAC	ACTCTGGTGGTGCAGAGTCACTGGCTAATTATTTCAGTCGCAAGTTAGGTGACAAACGA	1	-14.2	No	Yes	No	No
	spf	yjgN	GTAGGGTACAGAGGTAAGATGTTCTATCTTTCAGACCTTTTACTTCACG	GTTTTTGTTAGTTGTCTTTTTTTTGTTTTTTTCTATTTCGCAA	8	-11.3	No	Yes	Yes	No
	gcvB	ulaA	CCCTGTCTGTCCATAGTGATTAATGTAGCACCGCCTA	TGTTGTTGCAGGCAGGGTCCGGC	1	-18	No	No	Yes	No
	cyaR	fimD	TGAAAAACATAACCCATAAAATGCTAGCTGT	TCCGACTCGTTGTCGCCTGTGCTTTTGCCGCACAGGCACCTTTGT	1	-5.9	No	No	Yes	No
	arcZ	moaA	TCCCTGGTGTTGGCGCAGTATTCGCGCACCCCGGTCT	TTTCTTACCGTCGATGAAATTCGCCGGGTTACGCGCGCCTTCGCCAG	1	-34.8	No	No	Yes	No
	sdsR	csiE	TTAGCGCACGGCTCTCTCC	GCGAAACAGGACGGGAGATCCTGCGCTATC	1	-22.9	No	No	No	Yes
	arcZ	focA	AAAACAGTGCTGTGCCCTTGTAACT	ACCGCCGGTGTTTTCATCTCA	1	-6.7	No	No	Yes	No
	gadY	insD1_4	TGGAGACGGCAGACTATCCTCTTCCCGGTCC	AGCGCACGCGCCCTTATTGCCCGGGGATGGGGAGTAAGCTTAGTCAGCCGTTGTCTC	1	-35	No	No	Yes	No
	gcvB	gatZ	ACTTCCTGAGCCGGAACGAAAAGTTTTATCGGAATG	GAAGTTCCGGTTCCGGGCGGTGA	2	-23.6	No	Yes	No	No
	arcZ	yegT	TTTCCCTGGTGTTGGCGCAGTATTCGCGCACCCCGGTCTA	AACGAAATTACGGCTATCAAGGTCGATGATCGCGATATTGCGTTGACACAAGGGGAAGTTA	17	-41.3	Yes	Yes	Yes	Yes
	oxyS	cadC	CTAAAGCCAACGTGAACTTTTGCGGATCTC	TTTCTATTATGCAACAACCTGTAGTTCGCGTTGGCGAA	4	-26.4	No	No	Yes	No
	cyaR	yjdF	TGCTAGCTGTACCAGGAACCACCTCCTTAGCCTGTGT	GTTCCTGGTCTGCTGCGTGGC	5	-22.1	No	No	Yes	No
	cyaR	eno	TAAAATGCTAGCTGTACCAGGAACCACCTCCTTAGCCTGTGTAATCTC	ATCTGGAGGGTGGTTTCGTCGGTAT	2	-23.5	No	Yes	No	No
	arcZ	nth	TTTCCCTGGTGTTGGCGCAGTATTCGCGCACCCCGGTCTA	ATTTGCGCCGGGGAAAAACGTCG	15	-20.2	No	Yes	Yes	Yes
	cyaR	gatA	GTTTCGCTGAAAAACATAACCCATAAAATGC	TACGCTGTTTATTTGGCAAGTTACAACAGCCCGATATCGT	1	-9.2	No	No	No	Yes
	ssrS	typA	CTGCGGCGGCATCTCGGAGATTCCC	ACTCTCCGTTGATGAGCCGAC	1	-22.3	No	No	Yes	No
	gadY	yghJ	AACAGGGAGTGTTATAACGGTTTATTAGTCTGGAGACGGCAGACTATCCTCTTCCCGGTCCCCT	ACAAAGGTGGATCGGTGCTGATCATGGAAAACGTGATGAGCAATCTTAAGGAAGAGAGCGCGTCTGGTTTT	1	-31.7	No	No	No	Yes
	micA	ygaZ	AAGACGCGCATTTGTTATCATCATCCCTGAATTCAGAGATGAAATTT	TTCCGGTGGCCTTTGCGTTCGGTCTGAATGCGACCCGTCTGGGATTCTCTCC	1	-21.5	No	No	Yes	No
	gcvB	lrp	TTTGCAATTGGTCTGCGATTCAGACCATGGTAGCAAAGCTACCTTTTTTCACTTCCTGTACATTTACCCTGTCTGTCCATAGTGA	TTCAGGGTCAGACAGGAGTAGGGAAGGAATACAGAGAGACAATAATAATGGT	11	-34.9	No	Yes	Yes	No
	ffs	gadB	GCAGATGACGCGTGTGCCGGGA	CGGTGGCTTCCTGGCACCGTTCGTCGCCCCGGATATCGTCTGGGACTTCCG	1	-27.4	No	No	Yes	No
	cyaR	gatB	CTGAAAAACATAACCCATAAAATGCT	ATTATTGTCGCTTGCGGAGGCGCGGTTGCGACCTCTACGATG	1	-7.3	Yes	No	Yes	No
	arrS	rbsD	GTAATCCGATTTAAATATCGAGTCTCCTTGTTTCGACTTAAGCTGGCAATTGGATTGCCAGCTTTCTTTT	TAACCCAGGGTGTACCTTCTTTTATGCAGGTGCTGGGCGTCGTCACAAATGAAATGCAGGTCGAGGCGGCCAT	2	-28.6	No	Yes	Yes	No
	cyaR	dcuA	CTGAAAAACATAACCCATAAAATGC	GCGACACTGCCAGTTATCGCTGAAGTTGCGAAGGAACAAGGCGTTAAACC	1	-4.9	Yes	No	Yes	No
	spf	gloB	TACTTCACGTAATCGGATTTGGCTGAATATTTTAGCCGCCCCAGTCAGT	AGTTACGGGCAAAAAATCAAATAACACTACCCGTAATTCTGAAAAATGAGCGGCAAATTAATGTTTT	1	-15.3	No	Yes	No	No
	sdsR	malT	AAGCCTGCATTAATGCCAACTTTTAGCGC	TCCGCAGTTGGTGTTATTGCAGGCGTGG	1	-31.3	No	No	Yes	No
	cyaR	rpsM	CTGAAAAACATAACCCATAAAATGCT	TCGGCAAGACCCGTTCTAAAGCCATCCTGGCTGCAGCGGGTATCGCT	1	-7.6	No	No	Yes	No
	arcZ	yjhF	TTTCCCTGGTGTTGGCGCAGTATTCGCGCACCCCGGTCTA	GCTTAATACGTTTGTTTCGTTAATTATTGTCTCGATTGCTGTCGCCATCGCCAGTGGTATGG	21	-34	No	Yes	Yes	No
	cyaR	pflD	AACATAACCCATAAAATGC	GCTGTAACGTTGTGGAAACGCGCCGCGATGATGTGGCGC	1	-6.4	No	No	No	Yes
	cyaR	ydaU	CTGAAAAACATAACCCATAAAATGC	AAATTAACCAAAAAATC	1	0	No	No	Yes	No
	cyaR	trkG	AAAAACATAACCCATAAAATGCTAGCTGTACCAGGAACCACCTCCTTAGCCTGTGT	AGAGTTGTTACTCATATGTGTGGGTTCCTGGTTTGGCTCTATAGTCTTTCAATGTTGCCACCAATG	26	-26	Yes	Yes	Yes	No
	cyaR	tnaA	CTGAAAAACATAACCCATAAAATGC	TTAAAAGCGATGTACAGCATCGCGAAGAAATACGATATTCCGGTG	1	-3.1	No	No	Yes	No
	cyaR	glcD	CTGAAAAACATAACCCATAAAATGC	GCGGCAATGTGGCTGAAA	1	-6.2	No	No	Yes	No
	gcvB	spoT	AGTTTTATCGGAATGCGTGTTCTGGTGAACTTTTGGCTTACGGTTG	TGACGTGATTGAAGATACTCCCGCCACCTACCAGGATAT	1	-18.4	No	Yes	No	No
	cyaR	hsdR	CTGAAAAACATAACCCATAAAATGC	GACTGTGTCGATATCTACAGCACGCTGGAGAGCGTCGACACCATGC	1	-3.6	No	No	Yes	No
	cyaR	yecF	CTGAAAAACATAACCCATAAAATGC	TGAGTACGCCTGATTTTTCTACTGCCGAGAATAATCAAGAACTGGC	1	-3.9	No	No	Yes	No
	arcZ	rhlB	TTCCCTGGTGTTGGCGCAGTATTCGCGCACCCCGGTCT	TTTTCTACCCTTCTAACGAAGAAAAAATGCGTTTGCTGCAAACGCTGATCGAAGAAGAGTGGCCAGACAGAGCGATTATTTTCGCCAACACCAAACACCG	6	-34.3	Yes	Yes	Yes	Yes
	gcvB	dinI	ATGCGTGTTCTGGTGAACTTTTGGCTTACGGTTGTGATG	TATGCCGCAGCGAATAATTTATCGGTTATTGGCGCGACAA	1	-22.5	No	Yes	No	No
	arrS	yjgN	GTAATCCGATTTAAATATCGAGTCTCCTTGTTTCGACTTAAGCTGGCAATTGGATTGCCAGCTTTCTT	TTGTTAGTTGTCTTTTTTTTGTTTTTTTCTATTT	2	-10.5	No	No	Yes	No
	arcZ	oppF	ATTTCCCTGGTGTTGGCGCAGTATTCGCGCACCCCGGTCTAGCCGGGGTCATTTTTTA	ATCCACTACATCCTTACACCAGGGCATTGATGTCGGCAGTCCCCATACCTGATCCGGATCTGGAGAAGAACAAAACCATCCAGTTACTGGAAGGGGAATTACCGTC	53	-32.7	No	Yes	Yes	Yes
	cyaR	ompA	TAGCTGTACCAGGAACCACCTCCTTAGCCTGTGTAATCTCCCTTACACGGGCTTATTTTTT	TATGGCGTGCAGACACTAAATCCAACGTTTATGGTAAAAACCACGACACCGGCGTTTCTCCGGTCTTCGCTGG	1	-21	Yes	No	Yes	No
	arcZ	cysN	TTCCCTGGTGTTGGCGCAGTATTCGCGCACCCCGGTC	CACTTTCCGCACTGGGGCGCGCGCGATTTGCTGGGGGAT	1	-36	No	No	Yes	No
	chiX	bamB	AAGTGACGGCATAATAATAAAAAAATGAAATTCCTCTTTGACGGGCCAATAGCGATATTGGCCAT	TGAGAGGGACCCGATGCAATTGCGTAAATTACTGCTGCCAGGACTGCTTTCCGTTACCCTTTTAAGCGGCTGTT	1	-20.9	No	Yes	No	No
	arrS	dppA	GTAATCCGATTTAAATATCGAGTCTCCTTGTTTCGACTTAAGCTGGCAA	AAAAACAAAAAAGGTCAGGCAGCGACAACCCACTGCAAAGGGTTAAAACAACAAACATCACAATTGGAGCAGAATA	1	-16.6	No	No	Yes	No
	chiX	rmf	AAATTCCTCTTTGACGGGCCAATAGCGATATTGGCCATTTTTTT	GAATCAAAGGTCACAATGGCTGGGAGGCTGGCGAGAAGCCATGGCGGACAGGGTAGTAATGGCCTGATTC	1	-25.8	No	Yes	No	No
	gadY	umpG	AGTTTCCCGTGCCAACAGGGAGTGTTATAACGGTTTATTAGTCTGGAGAC	TTTAACTGCGCATAGCGCGCAAGATGTGGTTTCA	1	-15	No	No	Yes	No
	spf	aas	GTAGGGTACAGAGGTAAGATGTTCTATCTTTCAGACCTTTTACTTCACGTAA	GAAAAATTACAAGAAAGTACCAAACAGCTTTGGCAGGATAAATTTGGCCTGCGCATCCTTGAAGGCTACGGC	1	-19	No	No	Yes	No
	spf	gadX	GTAGGGTACAGAGGTAAGATGTTCTATCTTTCAGACCTTTTACTTCACGTAATCGGATTTGGCTG	CATTAATCTTTGCGTTGTTATCTGTTTTTCTTGAGGATGAGCACTTTATACCGCTGCTTCTGAA	1	-28.2	No	No	Yes	No
	spf	pykA	GTAGGGTACAGAGGTAAGATGTTCTATCTTTCAGACCTTTTACTTCAC	AGGATGTGATGCGAAAATTGTTG	1	-7.4	No	No	Yes	No
	gadY	maeA	TCCCGTGCCAACAGGGAGTGTTATAACGGTTTATTAGTCTGGAG	GGGCATCGGCGGGATGGGCATTCC	1	-14.1	No	No	Yes	No
	gadY	ptsG	TGCCAACAGGGAGTGTTATAACGGTTTATTAGTCTGGAGA	TCTTTACTGGCGTTGTGCTGTCCTTCATTTGGCCG	1	-21.6	No	No	No	Yes
	cyaR	rlmL	GAAAAACATAACCCATAAAATGC	ATTACGCAAAAAACGCTCTCCCAGGATTTCGCCCGTAACCGCCAGAT	1	-3.2	No	No	Yes	No
	cyaR	nhaA	AACCCATAAAATGCTAGCTGTACCAGGAACCACCTCCTTAGCCTGTGTA	AATTATGGTGGTGGGGATCCTGTGCGGT	3	-26	Yes	Yes	Yes	No
	cyaR	wecB	AAAACATAACCCATAAAATGC	TTCTGGAAGCGTTAAAAAATAATCGGA	1	-3.7	No	Yes	No	No
	cyaR	mutS	AAACATAACCCATAAAATGC	TTCGACGCCCATACGCCCATGATGCAGCAGTATCTCAG	1	-1.9	No	No	Yes	No
	ryeA	gatD	CTTCTGGCTTTTAACAGATAAAAAGAGACCGAACACGATTCCTGTATTCGGTCCAGGGAAATGGCTCTTGGG	TATTTAAAAATGGTGCACATTATTATCCAATAACG	1	-7.8	No	No	Yes	No
	omrB	rpsJ	TATTGATAGGTGAAGTCAACTTCGGGTTGAG	GAGGAGTAATCATTTTCGTTTATAAAATAATTGGAGCTCTGGTCTCAT	1	-7.9	No	Yes	No	No
	cyaR	pck	CACCTCCTTAGCCTGTGTAAT	CAATACATATTGGCTAAGGAGCAGTGAAATGCGCGTTAACA	2	-24.4	No	No	Yes	No
	omrB	ygaZ	CAGAGGTATTGATAGGTGAAG	TTGTCTGTGGCTGCCTCACTGCGTTAATCCAGGCATTCT	1	-13.6	No	Yes	No	No
	cyaR	sspA	GCTGAAAAACATAACCCATAAAATGC	ATTGTGCTGGCTGAGAAAGGTGTAAGTTT	1	-3.8	No	Yes	No	No
	gcvB	nlpD	TTTACCCTGTCTGTCCATAGTGA	ATAATGATGATTACCTGAGTGCCTACGCCCATAACGAC	1	-3.1	No	Yes	No	No
	chiX	pstS	GACGGGCCAATAGCGATATTGGCCATTTTTTT	TTGGTGCCTCTGACGCGC	1	-8.8	No	No	Yes	No
	cyaR	glpF	CTGAAAAACATAACCCATAAAATGCTAGCTGTACCAGGAACC	ACTTCCTGGTGCCGCTTT	1	-20.9	Yes	No	Yes	No
	gcvB	treC	TTTACCCTGTCTGTCCATAGTGA	CCTGGCAGGCAGGGCAAATGC	1	-21.3	No	No	Yes	No
	cyaR	yhgF	GAAAAACATAACCCATAAAATG	TGTGTGAAAAACATAAC	2	-3.5	No	No	Yes	No
	ryeA	lrp	TTAACAGATAAAAAGAGACCGAACACGATTCCTGTATTCGGTCCAGGGAAATGGCTCTTGGG	ATGAGTTGCAAAAGGATGGGCGTATTTCTAACGTCGAGCTTTCTAAACGTGTGGGACTTTCCC	1	-24.4	No	Yes	No	No
	cyaR	atpF	CTGAAAAACATAACCCATAAAATGC	GTGCCCGTGAAGAGCTGCGTAAGCAAGTTGCTATCCTGGCTGTTGCT	1	-3	No	No	Yes	No
	cyaR	lldR	CATAACCCATAAAATGCTAGCTG	TTTGCCGGTGATGCTGACGGGGCGCGTAAAG	1	-8.9	No	No	Yes	No
	spf	rbsC	ATTTTAGCCGCCCCAGTCAGT	CAAAAAGCAGTAATAACGACTACAGGACA	1	-5.9	No	Yes	No	No
	arcZ	recB	TTCCCTGGTGTTGGCGCAGTATTCGCGCACCCCGGTCTA	CATCAGTTTCCGCGCGGTGCGTCACCGGGGACG	17	-32.9	Yes	Yes	No	No
	spf	luxS	TCTATCTTTCAGACCTTTTACTTCACGTAATCGGATTTGG	TTTTTAAAAAAATTACCGGAGGTGGCTAAA	1	-9.5	No	No	Yes	No
	sdsR	preA	AACTTTTAGCGCACGGCTCTCTCCCAAGAG	ATGGGAGGAGCTGGCGCGCCT	1	-30.4	No	No	No	Yes
	dsrA	ihfA	TTAAGTGCTTCTTGCTTAAGCAAGTTTCATCCCGACCCC	ACAAAAGCTGAAATGTCAGAATATCTGTTTGATAAGCTTGGGCTT	1	-12.6	No	Yes	No	No
	chiX	relA	AAGTGACGGCATAATAATAAAAAAATGAAATTCCTCTTTGACGGGCCA	ACATCGAAGAGTTCGTTGGT	1	-12.4	No	No	Yes	No
	cyaR	rlmL	GCTGTACCAGGAACCACCTCCTTAGCCTGTGTAATCT	TGTGTGGTTCCGGTACGTTGCTG	1	-23.4	No	No	Yes	No
	chiX	ygcN	AAAATGAAATTCCTCTTTGACGGGCCAATAGCGATATTGGCCATTTTTTT	ATTGCAGGCACCGCTTG	1	-12.5	No	No	No	Yes
	gadY	hdeA	TTATTAGTCTGGAGACGGCAGACTATCCTCTTCCCGGTCCC	CGTTATTCTTGGTGGTCTGCTTCTTCTGC	10	-22.3	Yes	No	Yes	Yes
	spf	hupB	TACTTCACGTAATCGGATTTGGCTGAAT	AAAGAGGAAGAGAAGAGTGAATAAATCTCAATTGATCGACAAGATTG	1	-6.9	No	No	Yes	No
	cyaR	ompA	CTGAAAAACATAACCCATAAAATG	AAAAAATGAAAAAGACAGCTATCGCGATTGCAGTGGCACT	1	-3.9	Yes	No	Yes	No
	ssrS	yhjD	TACAGCCTGCGGCGGCATCTCGGAGATTCCCTT	TTGATGGTGTCGTTTGCCGCAGGGGGCTTTGTG	1	-25.7	No	No	Yes	No
	spf	rseP	CGTAATCGGATTTGGCTGAATATTTTAGCCGCCCCAGTCAGT	GTGGGCCGATCTCTATCGCCAAGGGGGCTGGGATGACAGCGGAACTCGGGGTTGTTTATTACCT	1	-29.1	No	Yes	No	No
	omrB	pcnB	TATTGATAGGTGAAGTCAACTTCGGGTTGAG	TATTTTTACCCGAGTCGCTAATTTTTGC	1	-13.4	No	No	No	Yes
	chiX	nrdA	AAGTGACGGCATAATAATAAAAAAATGAAATTCCTCTTTGACGGGCCAATAGCGATATTGGCCATTTTTTT	AGAGTTTGAACGTCTGTATACCAAATATGAGAAAG	1	-9.1	No	Yes	No	No
	gcvB	tufB	GGAATGCGTGTTCTGGTGAACTTTTGGCTTACGGTTGTGATG	TTCTGAGCTAATTGCCGATAACATTTGACGCAATGCGCAC	1	-19.7	No	No	Yes	No
	spf	secM	ACTTCACGTAATCGGATTTGGCTGAATATTTTAGCCGCCCCAGTCAGT	AACACTGCCCGTTGCTGAAGAAT	1	-12.8	No	No	Yes	No
	mgrR	yjbR	AAGCATTCACCGCCGGTT	GGCAAAACCAGGCGCAGAACAGAGCGTGCATAATGACTGGAAAGCGACGCA	3	-13.9	Yes	No	No	Yes
	rybB	inaA	AGTGCCACTGCTTTTCTTTGATGTCCCCATTTTGTGGAGCCCATCAACCCCGCCATTTCGGTTCAAGGTTGATGGGTTTTTTGT	CCATGTTGAAAGCAGTGGCGCTG	14	-26.5	No	No	Yes	Yes
	arcZ	ldcC	TTCCCTGGTGTTGGCGCAGTATT	TTTGACACCGGGGATGGACG	1	-20.2	No	No	No	Yes
	arcZ	amiA	GGCGCAGTATTCGCGCACCCCGG	AACTGCACAGCCGCAACACC	1	-11.4	No	No	Yes	No
	spf	yhiN	ACAGAGGTAAGATGTTCTATCTTTCAGACCTTTTACTTCACGT	TTCCGTGATTACCGCTGAAAACGGCACCGTTT	1	-12.1	No	No	Yes	No
	arcZ	lsrA	TTTCCCTGGTGTTGGCGCAGTATTCGCGCACCCCGGT	TTTACGTTGCATCAGGGGGAGGT	3	-20.8	No	No	No	Yes
	gcvB	ompF	TTTATCGGAATGCGTGTTCTGGTGAACTTTTGGCTTACGGTTGTGATGT	AAAGCTGTTGGTCTGCATTATTTTTCCA	1	-13.3	No	No	Yes	No
	spf	ybaB	CGTAGGGTACAGAGGTAAGATGTTCTATCTTTCAGACCTTTTACTTCACGTAA	TCAACGACGCAGCACGTCGTATTGAAGAAACGCAGAAAGAAAAAATGGCCTCTGTATCCTCCGGAATG	36	-34.2	No	Yes	Yes	No
	spf	rcsB	TGGCTGAATATTTTAGCCGCCCCAGTCAGT	ATATGAACGTAATTATTGCCGATGACCATCCGATAGTCTTGTTCGGTATTCGCAAATCACTTG	1	-11.6	No	Yes	No	No
	cyaR	sdhA	CTGAAAAACATAACCCATAAAATGC	TTCAAAGCCCGCGCTACCGTGCTG	1	-2.1	No	No	Yes	No
	cyaR	fabR	CGCTGAAAAACATAACCCATAAAATGCT	TAGCCAATTAAGTGCTGAACGCAGCTTCGCCAGCC	1	-6.6	No	No	No	Yes
	cyaR	cof	AAACATAACCCATAAAATGCTAGCTGT	CAGGCTGTCTCTCACTATTTGACG	1	-4.8	No	No	Yes	No
	arcZ	typA	TCCCTGGTGTTGGCGCAGTA	TTGATGAGCCGACCGTTTCTATGTTCTTCTGCGTTAACACCTCGCCGTTC	4	-22.5	No	Yes	No	No
	chiX	crr	AAGTGACGGCATAATAATAAAAAAATGAAATTCCTCTTTGACGGGCCAATAGCGATATTGGCCATTTTTTTA	ATTTACTGCTTAGGAGAAGATCATGGGTTTGTTCGATAAACTGAA	1	-14.1	No	Yes	No	No
	gcvB	secD	GATTCAGACCATGGTAGCAAAGCTACCTTTTTTCACTTCCTG	TTGTGGAAGTACGTCATGCTGATCG	1	-12.2	No	No	Yes	No
	chiX	pldB	AAGTGACGGCATAATAATAAAAAAATGAAATTCCTCTTTGACGGGCCAATAGCGATATTGGCCATTTTT	GTTCCATTTGGGGTTTGATGTCTTAATCATCGACCATCGCGGGCAGGGACGTTCCGGTCGCCTGTTAGCCGA	1	-23.5	No	No	Yes	No
	chiX	msbA	AAGTGACGGCATAATAATAAAAAAATGAAATTCCTCTTTGACGGGCCAATAGCGATATTGGCCATTTTTTT	TTCAGCTGATCGCCTCTTTGGCGCTG	1	-18	No	Yes	No	No
	gcvB	fecE	CATTTACCCTGTCTGTCCATAGT	AGTTACGGGACAGACAAGGTACT	1	-21.9	No	Yes	No	No
	sgrS	lhr	TTGGTGTAAAATCACCCGCCAGCAGATTATACCTGCTGGTTTTTTTT	TGCCCGCGTACGCGACTATTCGTCAGAAATGCTCGATGA	1	-9.9	No	Yes	No	No
	gcvB	secA	TGTGATGTTGTGTTGTTGTGTTTGCAATTGGTCTGCGATTCAGACCATGGTAGCAAAGCTAC	CGGCTTTGACTACCTGCGCGACAACATGGCGTTCAGCC	4	-35.8	No	No	Yes	No
	spf	thrS	GTTCTATCTTTCAGACCTTTTACTTCACGTAATCGGATTTGGCTGAATA	TAAAGCAGACTTGAGAAATGAGAAGATT	1	-10.1	No	No	Yes	No
	arrS	cspE	GTAATCCGATTTAAATATCGAGTCTCCTTGTTTCGACTTAAGCTGGCAATTGGATTGCCAGCTTTCTTTT	AGTGGTTTAATGAGTCCAAAGGATTCGGTTTCAT	1	-17.9	No	No	Yes	No
	glmZ	ompC	TGGACACAACGTTGAGTGAAGCACCCACTTGTT	AAATTAGATCTGTACGGTAAA	1	-3.2	Yes	No	Yes	No
	rprA	mlaA	TGCTGTGTGTAGTCTTTGCCCATCTCCCA	CCATTTTGGGGATGGGCGGTTTT	3	-21.4	No	No	Yes	No
	gcvB	mltA	TTCCTGTACATTTACCCTGTCTGTCCATAGTGATTAATGTAGCACCGCCTAATT	TAACTTCATTATGGATGTGCAGGGTAGTGGG	11	-30.8	No	Yes	Yes	No
	arcZ	araC	TTCCCTGGTGTTGGCGCAGTATTC	TTCATCACTACGGTCGTCATCCGGAGGCTCGC	1	-14.4	No	No	Yes	No
	arrS	potF	AATCCGATTTAAATATCGAGTCTCCTTGTTTCGACTTAAGCTGGCAATTGGATTGCCAGCTTTCTTTT	GCCAGCTTTCTGGAGCG	4	-19.7	No	No	Yes	No
	sibC	allR	TCCTCCCCTGAGACTGACT	CGTTTTGTCAGTCAGGGTGAGCTG	1	-20.6	No	No	No	Yes
	arcZ	ahr	ATTTCCCTGGTGTTGGCGC	ACAACACCAGAGAAGGACCAAAAAATGTCGATGA	1	-18.2	No	No	Yes	No
	arrS	tas	AATCCGATTTAAATATCGAGTCTCCTTGTTTCGACTTAAGCTGGCAATTGGATTGCCAGCTTTC	CTTATGTCGTGATTATAAAAAGGAAACGGCTATGCAATATCACCGTATACCCCACAGTTCGCTGGAA	1	-15.1	No	No	Yes	No
	arrS	ompA	CCGATTTAAATATCGAGTCTCCTTGTTTCGACTTAAGCTGGCAATTGGATTGCCAGCTTTCT	ACTGGTGCTAAACTGGGCTGGTCCCAGTACCATG	1	-19	No	Yes	No	No
	chiX	ycaM	AAGTGACGGCATAATAATAAAAAAATGAAATTCCTCTTTGACGGGCCAATAGCGATATTGGCCATTTTTT	CTGTCTGGGGTTTTGGCAACGTTGTTAATAACT	1	-13.8	No	Yes	No	No
	cyaR	fusA	GAAAAACATAACCCATAAAATGC	ATTGGTGCTGAAGAACA	1	-3.3	No	Yes	No	No
	gcvB	lpxD	ACTTCCTGAGCCGGAACGAAAAGTTTTATCGGA	TAATCAACAAGACTAACGTTCCATCTTTTGTTCGCCAAACTTTACGGCCTGTCTCATTCTTACGATTGCGGCAGGCCGTGTTATTATTGTCG	2	-17.3	No	Yes	Yes	No
	gcvB	yhjA	CTTCCTGAGCCGGAACGAAAAGT	GCGGTGAAACTGATGCTGCGCTATCAGGTAGGCAAAGAGCTGCCGCAGGAGGATGTGGATGATAT	1	-14	No	Yes	No	No
	micA	ispF	AAAGACGCGCATTTGTTAT	ATTCCACAAATGCGCGTGTTTATT	1	-21.8	No	No	Yes	No
	ryeA	ilvL	GCTTCTGGCTTTTAACAGATAAAAAGAGACCGAACACGATTCCTGTATTCGGTCCAGGGAAATGGCTCTTGGG	GCCTGGTCGTGATTAGCGTGGTGGTGATTATTATCCCACCGTGCG	2	-25.5	No	Yes	Yes	No
	omrB	tsx	CTTCGGGTTGAGCACATGAATTACACCAGCCT	GTGGTTACCTGGTAGTAGGTTACAACTTCTGATTATGAAAATGCCGGGATTTATTCCCGGCATTT	1	-15.4	No	Yes	No	No
	gcvB	ribC	AGACCATGGTAGCAAAGCTACCTTTTTTCACTTCCTGTACATTTACCCTGTCTGTCCATAGTGATTAATGTAGCACCGCCT	GTTGTAAGTATGTTTACGGGGATTGTACAGGGCACCG	8	-25.1	No	Yes	Yes	Yes
	spf	icd	AATCGGATTTGGCTGAATATTTTAGCCGCCCCAGTCAGT	ATTGCTAACGATCGTGACTCT	1	-6.9	No	No	Yes	No
	micC	miaA	AACAGTCGTCCGGGCTTTTTTTTT	ATGTTGGCTTCAGGTTTTGAAGCAGAAGTCCGGGCGCTTTTTGC	2	-22.6	No	Yes	No	No
	arrS	rpoC	GTAATCCGATTTAAATATCGAGTCTCCTTGTTTCGACTTAAGCTGGCAATTGGATTGCCAGCTT	GAACGTGACGGCCTTTTCTGCGCCCGTATCTTTGGGCCGGTAAAAG	1	-16.8	No	Yes	No	No
	rdlA	arcA	TCAACGTGCGGGGGTTTTCTC	CAAACATGCAGACCCCGCACATTCT	1	-19	No	No	Yes	No
	chiX	yebO	AAAGTGACGGCATAATAATAAAAAAATGAAATTCCTCTTTGACGGGCCAATAGCGATATTGGCCATTTTTTTA	AGAGGTGGTGAAATGAACGAAGTTGTAAATTCAGGCGTGATGAACATTGCGTCTTTGGT	1	-18.5	No	Yes	No	No
	ryeA	lrhA	GAAGGAAATGCTTCTGGCTTTTAACAGATAAAAAGAGACCGAACACGATTCCTGTATTCGGTCCAGGG	AGCCCAATGTCTGCTCCGGAAGGGGATGATTCATTGTTGATTGAAAGGGATATCG	1	-21.8	No	Yes	No	No
	gcvB	glpB	CATTTACCCTGTCTGTCCATAGTGATTAATGTAGCACCG	CCGGTGACAGACATTCAC	1	-13.9	No	No	Yes	No
	spf	ydiH	ACTTCACGTAATCGGATTTGGCTGAAT	AACTTGAATTTGCTGAC	1	-4.3	No	No	Yes	No
	cyaR	katG	GCTGAAAAACATAACCCATAAAATGC	CACGTCAGACGATATCCATAACACCACAGC	1	-4.6	No	No	No	Yes
	chiX	yibB	GACGGCATAATAATAAAAAAATGAAATTCCTCTTTGACGGGCCAATAGCGATATTGGCCATTTTTTTA	ACTTTGAGCGTCTGGCCGCACTTGAAAATG	1	-12.7	No	No	Yes	No
	spf	yiaD	TCAGACCTTTTACTTCACGTAATCGGATTTGGCTGA	GAAACGTGTTTATCTTATTGCCGCCGTAGTGAGTG	1	-12.8	No	No	Yes	No
	gadY	ldtD	TCCTCTTCCCGGTCCCCTATG	AAAACAGGGGGCAAGGGATG	1	-20.4	No	No	No	Yes
	gcvB	gcvH	CCCTGTCTGTCCATAGTGA	GAACACGAATGGCTGCGTAAAGAAGCCGACGGCACTTACACCGTTGGTAT	1	-11.1	No	No	Yes	No
	cyaR	barA	CTGAAAAACATAACCCATAAAATGCTAG	AAGTCAATGCTGAAAAAC	2	-1.7	No	No	No	Yes
	cyaR	rplK	CTGAAAAACATAACCCATAAAATGC	TGGCTAACCCGAGTCCGCCAGTAGGTCCGGCTCTGGGTCAGCAGG	1	-7.3	No	No	No	Yes
	cyaR	mlaF	CTGAAAAACATAACCCATAAAATGC	CAGCGCGCTGGGCGTGACTTGTGTGGTGGTTTCTC	1	-10.3	No	No	No	Yes
	arcZ	kbaZ	TCCCTGGTGTTGGCGCAGTATTCGCGCACCCCGGTCT	GAAAGTTCGCTCCGGCGAGCTGCAGCCAACGCCACGGGAACT	1	-39.9	No	No	No	Yes
	cyaR	ompC	CTGAAAAACATAACCCATAAAATGC	CAGGGCAACAGCGCTGAAAACGAAAACAACTCCTGGACCCGT	1	-5.1	No	No	No	Yes
	cyaR	acnB	CTGAAAAACATAACCCATAAAATGCT	GTAGAGCTGCTGAAAAAC	1	-2.5	No	Yes	No	No
	gcvB	glnA	CTTCCTGAGCCGGAACGAAAAGTTTTATCGG	TAGACTCGGCTCAGGAT	2	-21.7	No	No	Yes	No
	spf	yjdC	TAGGGTACAGAGGTAAGATGTTCTATCTTTCAGACCTTTTACTTCAC	TGTACTGGGAGAAGCCCTGAAATTATTAGAATTACAAGGGATTGCCAACACCACGCTGGAGATGGTTGCTG	1	-19.9	No	Yes	No	No
	cyaR	yedW	CTGAAAAACATAACCCATAAAATGC	CTTTGATAGTGATACCAATACG	1	-1.4	No	No	No	Yes
	cyaR	ytfK	CTGAAAAACATAACCCATAAAATGC	GAGATAACAATGAAAATTTTCCAACGG	1	-2.1	No	No	No	Yes
	gcvB	dsbD	GTGATTAATGTAGCACCGCCTAATTGCGGTGCTTTTTTTT	TGCTGGAGCGAGTGATT	1	-10.8	No	No	Yes	No
	spf	sufB	TAGGGTACAGAGGTAAGATGTTCTATCTTTCAGACCTTTTACTTCACGTA	ACCAAATCGACCATTATCTCGAA	1	-8.3	No	Yes	No	No
	cyaR	pykF	CTGAAAAACATAACCCATAAAATGCT	TGAAACTGCTGAAAAAC	2	-1.7	No	No	No	Yes
	ryeA	fixA	TAAAGTCAGCGAAGGAAATGCTTCTGGCTTTTAACAGATAAAAAGAGACCGAACACGATTCCT	CAGCGCGAACGTCAGCGCAT	1	-9.6	No	No	Yes	No
	gadY	yfhR	AGTCTGGAGACGGCAGACTA	CGCCGTCCCAGGCCGGATTG	2	-23.1	No	No	No	Yes
	ffs	yaeP	AGGCAGATGACGCGTGTGCCGGGATGTA	AGGATACGTTCCGGACGCGCTGGGCTGCGTTTTGAA	1	-31.3	No	No	No	Yes
	ryjB	dtpB	TCATCCGTCGTTGACTCCATGCCGATTCGGGTTAATCTGGTAGCGATCCCCGTCGATAC	ATTGCTGCCCTGGTGCCGCAGCATTTGATGGGCTTTATTCTCGGGATGTGGTTCCTGACGCAG	1	-31.8	No	No	Yes	No
	gcvB	yihQ	TTACGGTTGTGATGTTGTGTTGTTGTGTTTGCA	ACTACAAAACGACAACCTTAACCACAACCGTATCT	2	-28.4	No	No	Yes	No
	arcZ	fumA	TTTCCCTGGTGTTGGCGCAGTATTCGCGCACCCCGGTCTAGCCGGGGTCATTTTTT	CAGGAAACCAAAGCGTTACTGACGCCGGGGAAACTG	65	-30.5	Yes	Yes	Yes	Yes
	gcvB	yebF	TACATTTACCCTGTCTGTCCATAGTGATTAATGTAGCACCGCCTAATT	GTGGCTTGGGTCAGTTTGCAGGACATTCAGGGTAAAGATGA	47	-28.9	No	Yes	Yes	Yes
	cyaR	dmsC	CTGAAAAACATAACCCATAAAATGC	GCTGAAAAAGCTGTCAC	1	-0.9	No	No	No	Yes
	arcZ	gcd	TTCCCTGGTGTTGGCGCAGTATTCGCGCACCCCGGTCTAGCCGGGGTCATTTTTT	TTTTGATGTCAACACCGGGGAGCTGCTGTGGGCT	3	-28.7	No	No	Yes	Yes
	cyaR	ygfT	CTGAAAAACATAACCCATAAAATG	GGATCTGGTTGTCACTG	1	-5.6	No	No	No	Yes
	sdsR	lpxM	ATTAATGCCAACTTTTAGCGCACGGCTCTCTC	AGTGTGCCGTGCGCGCGTTG	1	-23.4	No	No	No	Yes
	gcvB	ftsY	CATTTACCCTGTCTGTCCATAGTGATTAATGTAGCACCGCCT	TTGAGCAGCAGGGTAAATCG	4	-20.7	No	No	Yes	No
	mgrR	pstA	AAAACACAAATCTATCCATGCAAGCATTCACCGCCGGTTTACTGGCGGTTTTTT	GATGGCCTTCGGCCTGTTCTGGCTGATCTGGATTTTAATGTCCACCATCACTCGCGGTATCGACGGTATGTCGC	1	-21.6	No	Yes	No	No
	ryeA	rfbA	CTTCTGGCTTTTAACAGATAAAAAGAGACCGAACACGATTCCTGTATTCGGTCCAGGGAAATGGCTCTTGGG	AATGATGAAATGAAAATGCGTAAAGGTATTATTTTAGCGGGTGGTTCTGGT	1	-13.1	No	Yes	No	No
	gadY	rtcB	TTTCCCGTGCCAACAGGGAGTGTTATAACGGTTTATT	TTGATGAGTCGGACCAGGTGTGGATTATGCTGCACTCCGGTTCAC	1	-16.5	No	Yes	No	No
	spf	rbsD	AGATGTTCTATCTTTCAGACCTTTTACTTCACGTAATCGGATTTGGCTGAATATTTTAGCCGCCCCAGTCAGT	ATTAACCCAGGGTGTACCTTCTTTTATGCAGGTGCTGGGCGTCGTCACAAATGAAATGCAGGTCGAGGCGGCCATTAT	4	-25.6	No	Yes	Yes	No
	cyaR	ygdQ	CTGAAAAACATAACCCATAAAATGCTAGCTGTACCA	TTCATTTTTTTGGCAGGGCTTTTTAGATGTTATTTGCATGGATAACCGA	2	-12.5	Yes	No	Yes	No
	cyaR	hdeD	AAAATGCTAGCTGTACCAGGAACCACCTCCTTAGCCTGTGTAATCTCCCTTACACGGGCTTATTTTT	GGGGATTTTCTTCTTAATTTTATAGGGTGGTTCTATGTTATA	6	-22.7	Yes	No	Yes	No
	omrB	nanE	ATTGATAGGTGAAGTCAACTTC	TGTACCGGGCCTTTCGCTAAGGGAAGATGTATGTCGTTACTT	1	-7.8	No	No	Yes	No
	micA	sufB	AAAGACGCGCATTTGTTATCATCATCCCTGAATTCAGAGATGAAATTTTGGCCACTCA	ATTGTGACGACACTTGCGCGTCTGAACCT	1	-25	No	No	Yes	No
	cyaR	def	CTGAAAAACATAACCCATAAAATGC	TCTAACTCCTGAACACATCTCTGGAGATTTATGTCA	1	-5.6	No	Yes	No	No
	spf	pqiA	ATTTTAGCCGCCCCAGTCAGTAATGAC	TTTCTGCTATGACGTTTGACCCGCGTTTGTCGTGGGATCGT	1	-8.3	No	No	Yes	No
	arrS	lipA	TTTAAATATCGAGTCTCCTTGTTTCGACTTAAGCTGGCAATTGGATTGCCAGCTTTCTT	AATTGAAACTCTGGTGCCGGATTTCCGCGGTCGTATGGATCGTGCTCTGGATATTCTGACTGCAACGCCACCAGATGTGTTC	1	-27.9	No	Yes	No	No
	rdlB	trxA	TCTGGTTTCAAGATTAGCCCCCGTTCTGTTGTCAGGTTTTACCTCTCAACGTGCGGGGGTTTTCTCTT	TTATTCCTGTGGAGTTATATATGAGCGATA	1	-14.7	No	No	Yes	No
	gcvB	fliN	GTGATTAATGTAGCACCGCCTAATT	ATTTGGCGGTGGTGATG	3	-16.5	No	No	Yes	No
	ryjB	yjiA	GGCGGCAGGGATCGCAGAAGGGTTATTGCTCTTTGCCGGGGATAAGCGCT	TGTTAATGGAGAGAGCATGAACCCGATTG	1	-25	No	No	Yes	No
	sdsR	gatZ	ACTTTTAGCGCACGGCTCTCTCCCAAGAGCCATTTCCCTGGACCGAATACA	CATTCAGTCCGGGGAATTATC	4	-21.7	No	No	No	Yes
	cyaR	yqhA	CGCTGAAAAACATAACCCATAAAATGCTA	GCAACGTCGCTGAAAAACAA	3	-2.9	No	No	Yes	No
	cyaR	thrL	AAAACATAACCCATAAAATGC	CATTACCACAGGTAACGGTGCGGGCT	1	-5.1	No	No	Yes	No
	glmZ	glmU	CAACGTTGAGTGAAGCACCCACTTGTTGTCATACAGACCTGTTTTAACGCCTGCTCCGT	CGCTGAAAGACGACAACCTTAACTGGGTGCTTCAGGCAGAGC	7	-32.8	No	No	Yes	No
	gcvB	dctA	ACCCTGTCTGTCCATAGTGA	CTAAAGGGGCGGCAGGGGTAAC	1	-20.1	No	Yes	No	No
	gcvB	acs	CTTCCTGAGCCGGAACGAAAAGTTTTATCGGAATGCGTGTTCTGGTGAACTTTTGGCTTACGGTTGTGATGTTGTGTTGTTGTGTTTGCAATTGGTCTGCGAT	CCTACAAGGAGAACAAAAGCATGAGCCAAATTCACAAACACACCATTCCTGCCAACATCGCAGACCGTTGCCTGAT	12	-44.1	Yes	Yes	Yes	No
	gcvB	nlpD	TTTTGGCTTACGGTTGTGATG	TACCAACAGCAAGCACAACCGAGCCGACT	2	-20.8	No	No	Yes	No
	chiX	nudE	GCATAATAATAAAAAAATGAAATTCCTCTTTGACGGGCCAATAGCGATATTGGCCATTTTTTTA	ACCGTCTTACTTTTCCAGCAAAATGAATATCGTGGTAGCGCAAGATCTCTACCCGGAATCACT	1	-18	No	Yes	No	No
	cyaR	rnr	AAATGCTAGCTGTACCAGGAACCACCTCCTTAGCCTGTGTAATCTCCCTT	TTTGTGGTTCCTGACGACAGCCGT	3	-25.3	No	No	Yes	No
	arrS	alaE	GTAATCCGATTTAAATATCGAGTCTCCTTGTTTCGACTTAAGCTGGCAATTGGATTGCCAGCTTTCTTTT	GGCTACTTCCTCGATTATTGCCGCCGACTGTTTAAAGTCAGCCGTTACCAGCAGGTAAAAGCC	1	-20.5	No	No	Yes	No
	ryeA	yfcH	GAAGGAAATGCTTCTGGCTTTTAACAGATAAAAAGAGACCGAACACGATTCCTGTATTCGGTCCAGGGA	CGCTGGACTCACGAGCAAAAAGAGCGTCTCTGCCAAAGCCGCTGGAATATCACGCAAAAACTGGT	1	-28.1	No	Yes	No	No
	ryeA	nlpD	AATGCTTCTGGCTTTTAACAGATAAAAAGAGACCGAACACGATTCCTGTATTCGGTCCAGGGAAATGGCTCTTG	ACGGTCACAGCGCCTGTAACGGTACCAACAGCAAGCACAACCGAGCCGACTGTCAGCAGTACATCA	1	-21.1	No	Yes	No	No
	rprA	pspB	AACGAATTGCTGTGTGTAGTCTTTGCCCATCTCCCACGATGGGCTTTTTTT	TTTGTGCTGTTTGTTTTACCGATCTGGTTATGGCTGCATTACAGCAATCGTTCT	4	-34.1	Yes	No	No	Yes
	oxyS	rimP	CACTGCCCGTTTCGAGAGTTTCTC	TTTATGTCTTGGGGGTGGGCTTGTCCACAT	1	-15.2	No	Yes	No	No
	gcvB	lysS	CTTCCTGAGCCGGAACGAAAAGT	ACGACGAAGCGATGTTCTACGATGAAGATTACGTCACCGCA	1	-6.9	No	Yes	No	No
	arcZ	argA	TTCCCTGGTGTTGGCGCAGTATTCGCGCACCCCGGTCTA	TATATCAATACCCACCGGGGAAAAACGTT	4	-18.8	No	Yes	No	Yes
	arcZ	tmcA	TTCCCTGGTGTTGGCGCAGTATTCGCGCACCCCGGTCTAGCCGGGGTCATTTTTTA	ATGATGGATGCACCAGGGCAAC	2	-18.7	Yes	Yes	No	No
	cyaR	alaE	CTGAAAAACATAACCCATAAAATGCTAGCTGT	TTCGATGTTGATGGGGGCGGTTTATGGCTACT	1	-12.4	Yes	No	No	Yes
	gadY	fadD	TCCCGTGCCAACAGGGAGTGTTATAACGGTTTATTAGTCTGGAGACG	ATTACGTGACGAAGCGCGCGGCAAAGT	1	-11.9	No	No	Yes	No
	cyaR	tolB	CTGAAAAACATAACCCATAAAATGCTAGCTGTACCAGGAA	TCCGGTCGTCCTATTGGTGTTGT	1	-11.6	Yes	Yes	No	No
	oxyS	oppA	AGAAACGGAGCGGCACCTCTTTTAACCCTTGAAGTCACTGCCCGTTTCGAGAGTTTCTCAACT	TAATACCAGTAATTATAATGAGGGAGTCCAAAAAACAATGACCAACATCACCAAGAGAAGTT	1	-18.3	No	Yes	No	No
	omrA	rpsT	ACGCTCTTCGTACCCTGTCTCTTGCACCAACCTGCGCGGATGCGCAGGTTTTTTT	TTTGAATTGTCCATATAGAACACATTTGGGAGTTGGACCTTGGCTAATATCAAATCAGCT	1	-15.8	No	Yes	No	No
	mgrR	ybaT	AAGCATTCACCGCCGGTT	CCTTTTTGATTTGCTACCTGGCGGTGTTTG	1	-19.4	No	No	No	Yes
	spf	prmC	TTACTTCACGTAATCGGATTTGGCTGAATA	CTGGTTACGTGAAGCAATA	1	-21	No	No	Yes	No
	arrS	yebO	AATATCGAGTCTCCTTGTTTCGACTTAAGCTGGCAATTGGATTGCCAGCTTTCTTTTA	ACATTGCGTCTTTGGTTGTATCGGTGGTGGTTCTTCTT	1	-17.1	No	Yes	No	No
	chiX	rpsH	ACGGCATAATAATAAAAAAATGAAATTCCTCTTTGACGGGCCAATAGCGATATTGGCCATTTTT	GTAAAGATGAGCTGCCGAAAGTTATGGCGGGTCTGGGTATCGCAGTTGTTTCTACCTCTAAAGG	1	-24.2	No	No	Yes	No
	gadY	typA	TTAGTCTGGAGACGGCAGACTATCCTCTTCCCGGTCCCCT	TTCCGGTACTGGTCTGCTGTACTCCACCT	6	-29	No	No	No	Yes
	mgrR	glcF	AAGCATTCACCGCCGGTTT	AGTGAACTGGCGGTCGAT	1	-19.1	No	No	No	Yes
	gcvB	tufB	TTGCAATTGGTCTGCGATTCAGACCATGGTAGCAAAGCTACCTTTTTTCACTTCCTGTACATTTACCCTGTCTGTCCATAGTGATTAATGTAGCACCGCCTAATTGCGGTGCTTTTTTTTA	ATCGATGTCTAAAGAAAAGTTTGAACGTA	7	-10.9	No	Yes	No	No
	micA	ldtE	AAAGACGCGCATTTGTT	TTTACAATGAAACGCGCGTCTTTGCT	2	-17.7	Yes	No	Yes	No
	chiX	hisJ	AAGTGACGGCATAATAATAAAAAAATGAAATTCCTCTTTGACGGGCCAATA	ATTCGGTGGCCCGTCTGTTAAAG	1	-19.8	No	No	Yes	No
	arcZ	sthA	TTCCCTGGTGTTGGCGCAGTATTCGCGCACCCCGGTCTAGC	GGCAACACTATTGAGTACTTCGTCAACACCACCTTTAACTACCCGACGATGGCGGAAGCCTATCGGGTAGCTGCGTTA	16	-29.2	Yes	Yes	Yes	No
	arrS	glf	GTAATCCGATTTAAATATCGAGTCTCCTTGTTTCGACTTAAGCTGGCAATTGGATTGCCAGCTTTCTTTTA	AAATATCATTAATGCTCAGAAAAAAAAGTATGGTGACAAGGTACCTGAAAATTTGGAG	1	-21.2	No	No	Yes	No
	gadY	nrdD	TTATTAGTCTGGAGACGGCAGACTATCCTCTTCCCGGTCCCCTATGCCGGGTTTTTTTTAT	CTTCTGCCGTCTCGATAC	5	-22.8	No	No	No	Yes
	ryeA	fumB	GGCTTTTAACAGATAAAAAGAGACCGAACACGATTCCTGTATTCGGTCCAGGGAAATGGCTCTTGGG	ATCCTGAAAGTGGAACCAGAAGCCCTGACCCTGCTGGCGC	1	-22	No	Yes	No	No
	arrS	recN	GTAATCCGATTTAAATATCGAGTCTCCTTGTTTCGACTTAAGCTGGCAATTGGATTGCCAGCTTTC	CGGGTAAATCTATTGCAATAGATGCCCTCGGTCTTTGTCT	1	-17.6	No	No	Yes	No
	cyaR	ygiQ	AAAAACATAACCCATAAAATGCTAGCTGT	ATCTGAAGATTGCCCCGGAACATACCGAAGA	1	-2.2	No	No	Yes	No
	gcvB	putA	ACGAAAAGTTTTATCGGAATGCGTGTTCTGGTGAACTTTTGGCTTACGGTT	CTGGCGTATCAGCTGGCCGATAAA	1	-13.4	No	No	Yes	No
	cyaR	lpxL	CTGAAAAACATAACCCATAAAATGC	ATTTCGAATCCGTTGGCATGGGCCT	1	-8.3	No	No	Yes	No
	arcZ	shiA	TTGTAACTCATCATAATAA	CGACTGTGCGAATTGCT	1	-4.7	No	Yes	No	No
	cyaR	recE	CTGAAAAACATAACCCATAAAATGCT	TGCTGCATCACGTGGTGA	1	-8.1	No	No	Yes	No
	chiX	mazF	AAGTGACGGCATAATAATAAAAAAATG	ATGGGCGATCTGATTTGGGT	1	-4.1	No	No	Yes	No
	arrS	fabR	GTAATCCGATTTAAATATCGAGTCTCCTTGTTTCGACTTAAGCTGGCAATTGGATTGCCAGCTTT	TCGCTGGTGGAAGCCGCATTTAGCCAATTAAGTGCTGAACGCAGCTTCGCCAGCCTGAGTTTGCGTG	1	-30.5	No	No	Yes	No
	gadY	mepS	CGTGCCAACAGGGAGTGTTATAACGGTTTATTAGTCTGGAGACG	TCTTGCGCGGGATTCCCGCGATTGCAGTAGCGGTTCTGC	1	-16.7	No	No	Yes	No
	arcZ	phoB	AGCCGGGGTCATTTTTTA	TTATGACAGTGCTGTGAATCAACTGAATGAACCCTGGCCGGATTTAAT	2	-19.9	No	No	No	Yes
	arcZ	ycaN	TTTCCCTGGTGTTGGCGCAGTATTCGCGCACCCCGGTCTA	AATAATTATTTACTATTCGCTTTACGCGCCAGCAGCGGGAAT	4	-31.3	No	No	Yes	Yes
	mgrR	tnaC	ATGCCTGTTAGCGTAAAAGCAA	TTATGAATATCTTACATAT	1	-2.5	No	No	Yes	No
	spf	ompC	ATTTTAGCCGCCCCAGTCAGTAA	AAAGCACAGAACTTCGAAGCTGTTGCTCAGTACCAGTTCGACTTCGGTCTGCGTCCGTCCCTGGCTTACCTG	1	-10.7	No	Yes	No	No
	cyaR	gcd	TAAAATGCTAGCTGTACCAGGAACCACCTCCTTAGCCTGTGTAATCTC	CTCATTGGCGGAGGCTGGCTGGTCGCGATTGGCGGCTCCTGGTA	2	-31.7	No	No	Yes	No
	gadY	srkA	TCCTCTTCCCGGTCCCCTATG	TGGACGCTCTGTTTGAGCATGGGATCCGGGTGGATT	1	-20.5	No	No	No	Yes
	spf	lpxH	ATTTTAGCCGCCCCAGTCAGT	TCGTGGCGACACTCTTTATTGCAGATCTTCATCTCTGCGTGGAAGAACCGGCGATCACCGCCGGTTTTCTGCG	1	-12	No	Yes	No	No
	arrS	dksA	GTAATCCGATTTAAATATCGAGTCTCCTTGTTTCGACTTAAGCTGGCAATTGGATTGCCAGCTTT	CCAGGAAGAAGAGTTCAGCCTCGAACTGCGTAACCGCGATCGCGAGCGTAAGCTGATCAAA	1	-23.3	No	No	Yes	No
	spf	nusA	CAGAGGTAAGATGTTCTATCTTTCAGAC	ATGTGCCGATGAAAGAGCTGTTGGAAATCGAAGGCCTTG	1	-16.1	No	No	Yes	No
	csrB	serC	TCAGGATGAACGATTGGCCGCAAGGCCAGAGGAAAAG	TATTACCTGTGGTCGCAATCGATTGACCGCGGGTTAATAGCAACGCAACGTGGTGAGGGGAAATGGCTCAAATC	1	-21.3	No	No	Yes	No
	chiX	bamB	AAGTGACGGCATAATAATAAAAAAATGAAATTCCTCTTTGACGGGCCAATAGCGATATTGGCCATTTTTTTA	TCTATTACACGTTAATCGTCTCTGTCGTTCACTTTGAAAACGGCTCCTGGACAGGGGCCGTTTT	1	-24.4	No	No	Yes	No
	dsrA	rng	TTTAAGTGCTTCTTGCTTAAGCAAGTTTCATCCCGACCCCCTCAGGGT	ATTACACAGGACGCCAGCCGATTTTCGATCTCTTTG	1	-7.4	No	No	Yes	No
	gadY	yhcN	AGTCTGGAGACGGCAGACTATC	TTCGCTGCCGACTCCATTGATGCT	1	-20.1	No	No	Yes	No
	mgrR	glrK	CTATCCATGCAAGCATTCACCGCCGGTT	GAAAAGGGGCGGTGAAGGGCAGCGGTCTGGGATTAAGCATTGCC	1	-24.2	No	No	Yes	No
	arcZ	yjfY	TTTCCCTGGTGTTGGCGCAGTA	TATCGCTAGCACCAGGTATAACCAA	25	-24.5	Yes	Yes	Yes	Yes
	chiX	yecM	AAGTGACGGCATAATAATAAAAAAATGAAATTCCTCTTTGACGGGCCAATAGCGATATTGGC	GGTTGGCACAGGGCAACAGGGTAAATTAACGCTTTTACTGAAAGACGAAGAGTGATTATGGCGAACTGG	1	-19.9	No	No	Yes	No
	cyaR	yghJ	CTGAAAAACATAACCCATAAAATGCTAGC	TATAAGAAATCGCTTTTAGCGGCTATTTT	1	-6	No	No	Yes	No
	cyaR	thiP	TGCTAGCTGTACCAGGAACC	CTTTCCGGGTCGGCTGG	1	-18.6	No	No	No	Yes
	cyaR	slyB	CTGAAAAACATAACCCATAAAATGC	CAACGTTATCGGTGCAATTGGCGGTGCTGTTCTTGGTGGTTTCCTGGG	1	-6.8	Yes	Yes	Yes	No
	gcvB	lysS	TTGTGTTGTTGTGTTTGCAATTGGTCTGCGATTCAGACC	GTCCGGTAAAATAAGCATTACGTTATGCTCACAACCCCGGCAAATGTCGGGGTTTTTT	1	-18	No	No	Yes	No
	cyaR	ftnB	CTGAAAAACATAACCCATAAAATGC	CTGTTGCTGCAAACCAT	1	-2.4	No	No	Yes	No
	mgrR	ldcC	GATTCGTTATCAGTGCAGGA	CGCTCTTACGATCTCAA	1	-6.9	No	No	Yes	No
	cyaR	cmk	CTGAAAAACATAACCCATAAAATGC	GTCTGATTGCCGATGGCCGCGACATGGGAACGGTGGTATTCCCTGA	1	-9	No	No	Yes	No
	cyaR	ybiC	CTGAAAAACATAACCCATAAAATGC	TTGCCGATCATTTAATCGCGGCAAACCTGGCAGGGCATGATTCACATG	1	-6.8	No	No	Yes	No
	cyaR	hsdR	CTGAAAAACATAACCCATAAAATGCTA	TCACAAATTACGCCGCATTGGTAACCAGGCGGTGCAC	1	-6.3	No	No	Yes	No
	cyaR	yfjI	CTGAAAAACATAACCCATAAAATGCTAGCTGTA	TAAAACAAAAATAATAAACAT	1	-1.2	No	No	Yes	No
	cyaR	gadX	CTGAAAAACATAACCCATAAAATGCTAGCTGTACCAGGAA	GAATAAGAATCTTCGCTATGCAGA	1	-8.2	No	No	Yes	No
	micA	ybeZ	GAAAGACGCGCATTTGTTATCATCATCCCTGAATTCAGAGATGAAATTTTGGCCACTCA	CAGACAATGCGCGTCTGTTGAG	1	-21.2	No	No	Yes	No
	gadY	selD	TTTCCCGTGCCAACAGGGAGTGTTATAACGGTTTATTAGTCTGG	GCTTGTGGGTAATGAAACCCGCGACGATGCGGCGGTGTACGATCTGGGCAATGGCACCAGCGTTATC	1	-21.9	No	No	Yes	No
	mgrR	slyB	ATCAGTGCAGGAAAATGCCTGTTAGCGTAAAAGCAA	TCTTGGTGGTTTCCTGGGGAA	1	-14.1	Yes	No	Yes	No
	arrS	relA	GTAATCCGATTTAAATATCGAGTCTCCTTGTTTCGACTTAAGCTGGCAATTGGATTGCCAGCTTTCTTT	AACGAGAAGGTGAACGTGCTTGGCGTTGCCAGCCGT	1	-25.7	No	No	Yes	No
	cyaR	ileS	CTGAAAAACATAACCCATAAAATGCT	TGTTATGTAATCAAACCGAAATACGGAACCGAGAATCTGA	1	-7.5	No	No	Yes	No
	gcvB	yeeX	TTGCAATTGGTCTGCGATTCAGACCATG	CAAGCCGGGGATGAGCGTTGAAGCAATCCAGGGCATCATCGCCAGCAT	1	-16.7	No	No	Yes	No
	ryeA	phoQ	AAGTCAGCGAAGGAAATGCTTCTGGCTTTTAACAGATAAAAAGAGACCG	CCGGTGGAGCTAAAAAGT	1	-9.6	No	No	Yes	No
	ffs	ftnB	GATGACGCGTGTGCCGGGATG	GTCTGAACGGCACCGCCACTT	1	-18.1	No	Yes	No	No
	omrA	bluR	TACGCTCTTCGTACCCTGTCTCTTGCACCAACCTGCGCGGATGCGCAGGTTTTTTT	GACTCTTTGATGAAGAAGACATACAACGCATCGAAG	1	-13.2	No	Yes	No	No
	cyaR	ispH	CTGAAAAACATAACCCATAAAATGC	TGGAGGCGTAACATGCAGATCCTGTTGGCCAACCCGCG	1	-4.9	No	No	Yes	No
	sdsR	yhcO	GCCAACTTTTAGCGCACGGCTCTCTCCCAAGA	ATTTGTTCATCTGGGAGAGAAAACGCGTCGC	3	-22.8	Yes	No	No	Yes
	gcvB	nlpD	CATTTACCCTGTCTGTCCATAGTGATT	TTTCGCTATGGCTGGCAGGCTGTTCTGAC	2	-23.8	No	No	Yes	No
	sroH	yebZ	GGTCAAGGCAAAGTCCGGTAATGGCGTTCTGAATACCA	TTTGGCTTCGCAATGTACGGTGCCTGGCTGGCCCCCTTGA	1	-24.2	No	No	Yes	No
	spf	fur	AGACCTTTTACTTCACGTAATCGGATTTGGCTGAAT	CACAATTTTGAAGGCGGTAAATCCG	1	-11.5	No	No	Yes	No
	omrB	recQ	TTGATAGGTGAAGTCAACTTCGGGTTGAGC	GGAATCCGGTGTTATTAGCCGTTGA	1	-13.7	No	Yes	No	No
	spf	yeaO	TAGGGTACAGAGGTAAGATGTTCTATCTTTCAGACCTTTTACTTCAC	AAAAAACCGATTTAGCC	1	-6.4	No	Yes	No	No
	spf	glcG	TAGGGTACAGAGGTAAGATGTTCTATCTTTCAGACCTTTTACTTCAC	ATGCGCAGGTCGCGAAAGCGG	1	-11.7	No	Yes	No	No
	spf	pbpC	TAGGGTACAGAGGTAAGATGTTCTATCTTTCAGACCTTTTACTTCAC	CCTTTCTCCTTTTTCTT	1	-7	No	Yes	No	No
	gadY	thrL	TTTCCCGTGCCAACAGGGAGTGTTATAACGGTTTATTAGTCTGGAGAC	TCACCATTACCACAGGTAACGGTGCGGGCTGACGCGTACAG	2	-18	No	No	Yes	Yes
	cyaR	tnaA	CTGAAAAACATAACCCATAAAATGC	CATTCCGACTCACCAGGGCCGTGGCGCAGAG	2	-9.2	No	No	Yes	No
	spf	msrC	TAGGGTACAGAGGTAAGATGTTCTATCTTTCAGACCTTTTACTTCACG	CGCTGATGGCGGGAGAAACCAGTTTTCTGGCAACGCTTGCGAACACCAGTGCGTTGTTATATGAGCG	1	-16.5	No	Yes	No	No
	cyaR	ompF	CTGAAAAACATAACCCATAAAATGCTAG	TGTTGACTACATCATCAACCAGATCGATTCTGACAACAAACTGGG	1	-5.4	Yes	No	Yes	No
	spf	raiA	TAGGGTACAGAGGTAAGATGTTCTATCTTTCAGACCTTTTACTTCAC	CAACAAGCTGGAACGGCAGCTCAATAAACTGCAGCACAAAGGCGAAGCACGTCGTGCCGC	1	-14.8	No	Yes	No	No
	chiX	maeA	AAGTGACGGCATAATAATAAAAAAATGAAATTCCTCTTTGACGGGCCAATA	ATCCCTTACGCTGGCCCTGTACTGCTGGAATTTCCGTT	2	-23.3	No	Yes	No	No
	arcZ	wecB	TTCCCTGGTGTTGGCGCAGTATTCGCGCACCCCGGTCTA	TTCAGGAAGAAGCGCCTTCGCTGGGGAAACC	8	-29.5	No	No	Yes	Yes
	cyaR	ompT	CTAGCTGTACCAGGAACCACCTCCTTAGCCTGTGT	TTTACAGCCAGAGGTGGTTCCTATATC	3	-26.4	No	Yes	No	No
	gcvB	gatY	TGTTCTGGTGAACTTTTGGCTTACGGTTGTGATGTTGTGTTGTTGTGTT	GTTGCAACGGAGCTGAAAAATGCCTTCTCGCAGGC	1	-17.9	Yes	Yes	No	No
	sroH	livF	TTATCGCAAGGTCAAGGCAAAGTCCGGTAATGG	ACCTGGCGATGGGCGGTTTTTTTGCTGAACGCGACCAGTTCCAGGA	1	-15.8	No	No	Yes	No
	cyaR	rfbC	CTGAAAAACATAACCCATAAAATGC	TTCAGCTGATAATAAGCAGC	1	-4.1	No	No	Yes	No
	arcZ	curA	TTCCCTGGTGTTGGCGCAGTATTCGCGCACCCCGGTCT	CTTGAAGAAGATGATGTCGCCACACCGGGTGAAGGA	2	-26.9	No	No	Yes	No
	cyaR	cydB	ACCAGGAACCACCTCCTTAGCCTGTGTAATCTCCCTTACACGGGCTTATTTTT	TGGGTTGCGGTGGTTCTGGTACCG	1	-23.7	Yes	No	Yes	No
	chiX	mepS	AAAGTGACGGCATAATAATAAAAAAATGAAATTCCTCTTTGACGGGCCAATAGCGATATTGGCCATTTTTTT	AATTTGCGTACGGGTGATTTAGTTCTGTTCCGT	1	-12.7	No	No	Yes	No
	spf	murE	CTTCACGTAATCGGATTTGGCTGAATATTTTAGCCGCCCCAGTCA	ATTGAAATTTGCGGCGTCGGTCTTTACCAACTTAAG	1	-17.1	No	No	Yes	No
	chiX	rbsD	ATAATAATAAAAAAATGAAATTCCTCTTTGACGGGCCAATAGCGATATTGGCCATTTTTTTA	ACCCAGGGTGTACCTTCTTTTATGCAGGTGCTGGGCGTCGTCACAAATGAAATGCAGGTC	1	-17.8	No	No	Yes	No
	gcvB	yghU	AAAGTTTTATCGGAATGCGTGTTCTGGTGAACTTTTGGCTTACGGTTG	TCTCCAGCGGCTTTGTCGAAGTGAACCCAAACTCGAAGA	1	-19.1	No	No	Yes	No
	psrD	malM	CGTTTTGCAGGTTGATGTTTGTTATCAGCACTGAACGA	ATCAGCAGTGTAAAAGG	1	-12.6	No	No	Yes	No
	ryeA	tehA	TTGGGAGAGAGCCGTGCGCTAAAAGT	TCTGATGCCATGGTATCTCTCCCAGCC	1	-28.2	No	No	No	Yes
	cyaR	fabB	GAAAAACATAACCCATAAAATGCTAGCTGTACCAGGAA	TTGCAGGTTCCGGCGGCGGCTCCCC	1	-13.7	No	No	Yes	No
	cyaR	dedA	CTGAAAAACATAACCCATAAAATGC	CGGGATTATTGTGGTTTCTATTTTGCCGGGC	1	-9	No	No	Yes	No
	cyaR	thrA	CTGAAAAACATAACCCATAAAATGCT	TGCTCACCAATGTACATGGCCTTAATCTGGAAAACTGGCAGGA	1	-3.9	No	No	Yes	No
	csrB	oppA	AGGAAGCAATAGTTCAGGATGAACGATTGGCCGCAAGGCCAGAGGAAAAGTTGTCAAGGATGAG	TTAGTAGCAGCTGGCGTTCT	1	-13.8	No	No	Yes	No
	csrB	elaD	GTCGACAGGGAGTCAGACAACGAAGTGAACATCAGGATGATGACACTTCTGCAGGACACACCA	AAAAAAATAATAAACTACAAATAAAA	4	-1.3	No	No	No	Yes
	arcZ	gmr	TTTCCCTGGTGTTGGCGCAGTATTCGCGCACCCCGGTCTAGC	TACATTGCAGTTATCTGCCGAACAGGCTGCTCGCATCAGGGAAATGACG	15	-33.2	Yes	No	Yes	Yes
	arcZ	gadB	TTCCCTGGTGTTGGCGCAGTATT	TTTAAGGTCGGAACTACTCGATTCACGTTTTGGTGCGAAGTCTATTTCCACTATCGCAGAATCAAAACGTTTT	1	-10.9	No	Yes	No	No
	gadY	mdtK	TCTGGAGACGGCAGACTATCCTCTTCCCGGTCC	AACGTCTGCCGTCAGCCATCATTCTGC	2	-23.4	No	No	Yes	Yes
	rybB	oppA	TTTCGGTTCAAGGTTGATGGGTTTTTTGTT	TTACTTGTTCACCCATCAACTTCACCG	5	-22.6	No	Yes	Yes	No
	gcvB	secM	AAAAGTTTTATCGGAATGCGTGTTCTGGTGAACTTTTGGCTTACGGTTGTGATGTTGTGTTGTTGTGTTTGCAA	CTGGATACGCTCAGCGCGCTGCTGA	1	-16.3	No	No	Yes	No
	gcvB	yfdY	CTTCCTGAGCCGGAACGAAAAGT	CTAGTGACGGGGATATTTATGTTTCTTGCCCCGGCTTGTGGCTTGATGATTCGCT	1	-15.8	No	No	Yes	No
	gcvB	atpB	CTTCCTGAGCCGGAACGAAAAGTTTTATCGGAATGCGTGTTCTGGTGAACTTTTGGCTTACG	CGTGGGCCATTTTCCACATCCTGATCATTACGCTGCAAGCCTTCATCTTCATGGT	1	-26.6	No	No	Yes	No
	omrB	malM	GGTTGAGCACATGAATTACACCAGCCTGCGCAG	TTTATCAGCAGTGTAAAAGGCA	1	-9.9	No	No	Yes	No
	gadY	speC	ACTGAGAGCACAAAGTTTCCCGTGCCAACAGGGAGTGTTATAACGGTTTATTAGTCTGGAGACGGCAGACTA	TAGCTCGCCGCTGCTGTTAGAACTTAACGAAAACGATCCGGGGATCTTTGTGACTCAGTCGGT	2	-41.5	No	Yes	No	No
	cyaR	apbE	AAAAACATAACCCATAAAATGC	GAAGTTACCGTTCTTGAA	1	-1.6	No	No	Yes	No
	arcZ	mtgA	AAACAGTGCTGTGCCCTTGTAACTCATCATAATAATTTACG	TTTCTGGGGCGGGGGCATCGCGTTGTTTAG	1	-27.8	Yes	Yes	No	No
	micA	hupB	TATGAAAGACGCGCATTTGTTATCATCATCCCTGAATTCAGAGATGAAATTTTGGCCACTCACGAGTGGCCTTTTTCTTT	AAGCTGCGGCTGGCCGTGCGTTAGATGCTATTATTGCTTCCGTAACTGAATCTCTGAAAGAAGGGGATGATGTAGCACTGGTAGGT	135	-52.6	Yes	Yes	Yes	Yes
	omrB	ytfK	AGAGGTATTGATAGGTGAAGTCAACTTCGGGTTGAGCACATGAATTACACCAGCCTGCGCAG	GTTGGGCCGATTGTGGCACCGCACAGGCGTAATACTCAGCAGGAGATAACAATGAAAATTTTCCA	1	-22.6	No	No	Yes	No
	arcZ	rbsD	CGGCGCAGCCAAGATTTCCCTGGTGTTGGCGCAGTATTCGCGCACCCCGGTCTAGCCGGGGTCATTTTTTA	CATTATCGCGGAAGAGATCAAACACCATAATCCGCAACTCCACGAAACGTTGCTCACTCACCTTGAGCAGCTGCAAAAACACCAGGGAAATACCATTGAAATTCGTTACACCACGCATGAA	2546	-40.5	Yes	Yes	Yes	Yes
	omrB	aceK	AGAGGTATTGATAGGTGAAGT	TTTTAACTCCGTGTACTGTCGGTTATTTGACCACCGCTCGCTTACTCCCGAGCGGCTTTTTAT	1	-11.7	No	No	Yes	No
	ssrS	lamB	TTCTCTGAGATGTTCGCAAGCGGGCCAGTCCCCTGAG	AATGGCTGTTGATTTCCACG	1	-8.5	No	No	Yes	No
	omrA	ytfR	ATTATTCGGTACGCTCTTCGTACCCTGTCTCTTGCACCAACCTGCGCGGATGCGCAGGTTTTTTT	GACGACCGACCAACACCAGGAGATCCTCCGCACCGAAGGATTAAGTAAATTTTTCCCCGGCGTCAAA	1	-21.9	Yes	No	Yes	No
	gcvB	yqiB	TGTGTTTGCAATTGGTCTGCGATT	ATCAGTTTTTAGCGGACTGGTTGCGAT	3	-21.9	No	No	Yes	No
	gadY	pepA	CTGAGAGCACAAAGTTTCCCGTGCCAACAGGGAGTGTTATAACGGTTTATTAGTCTGG	AGCAAGAATGTCATCACCCGCGTTATCGG	1	-9.4	No	No	Yes	No
	arcZ	ycaD	TTCCCTGGTGTTGGCGCAGTATTCGCGCACCCCGGTCT	TTATCTATTTGCTGATGCTGCTGCGCAACGCCGGT	1	-31.6	No	No	Yes	No
	ryeA	bhsA	AAGTCAGCGAAGGAAATGCTTCTGGCTTTTAACA	AACGTAAAAACCCTCATCGCTGCGGCG	1	-12.4	Yes	No	No	Yes
	arrS	oppA	CCGATTTAAATATCGAGTCTCCTTGTTTCGACTTAAGCTGGCAATTGGATTGCCAGCTTTCTTTTA	TTCTTGAAGGGAAAAAACCGATTACCGATCTCGGCGTGAAAGCTATTGATG	1	-18.5	No	No	Yes	No
	mgrR	cybB	GATTCGTTATCAGTGCAGGAAAATGCCTGTTAG	GGCGCATTTGGGACATTTGG	1	-9	No	No	Yes	No
	arcZ	pgi	TTTCCCTGGTGTTGGCGCAGTATTCGCGCACCCCGGTCTAGCCGGGGTCATTTTTT	TATCTGGGGTGAACCAGGCACTAACGGTCAGCACGCGTTCTACCAGCTGATCCACCAGGGAACCA	26	-44.8	Yes	No	Yes	Yes
	chiX	cycA	AAGTGACGGCATAATAATAAAAAAATGAAATTCCTCTTTGACGGGCCAATA	TAGACTGACTAAAGGCCGTAGAGCCTGAACAACACAGACAGGTACAGGAAGAAAAAAACATGGTAGATCAGGT	1	-12.4	No	Yes	No	No
	mgrR	mepH	TACTGGCGGTTTTTTTT	AAAAAGACCCAGAAAACAGCGAAAAAAGCCGCCAGTAAA	2	-25	No	No	Yes	No
	arcZ	dhaK	TTCCCTGGTGTTGGCGCAGTATTCGCGCACCCCGGTCTA	ATTTAATTGGCGCGTACTGCACCTCACT	6	-25.1	No	No	Yes	No
	sdsR	pgpB	CAACTTTTAGCGCACGGCTCTCTCCCAAGAG	CTTATCAAAAAGGAGAGGCCATGCGTTCGATTG	1	-25.2	No	No	Yes	No
	omrB	ompX	AGGTGAAGTCAACTTCGGGTTGAGCA	GAGCAGAGCCGTATTCGTAGCGTTGA	7	-10	No	Yes	No	No
	arrS	helD	CGATTTAAATATCGAGTCTCCTTGTTTCGACTTAAGCTGGCAATTGGATTGCCAGCT	AATGTCAGGCCTGGTTGAAAGAT	1	-17.3	No	Yes	No	No
	arcZ	osmY	TTCCCTGGTGTTGGCGCAGTATTCGC	TTCATGGATGACAGCGCCATCACCGCGAAAGTGA	1	-23.9	Yes	No	Yes	No
	gcvB	ygfF	CATTTACCCTGTCTGTCCATAGTGATTAATGTAGCACCGCCT	TTTGGCGGGCGGGAAATAAAACAGGGAAGTTGT	2	-21.9	No	No	Yes	No
	cyaR	pncC	CTGAAAAACATAACCCATAAAATGC	CCTTGTGGCAACAATTTCTACAAAAC	1	-5.8	No	No	Yes	No
	cyaR	yeeX	CTGAAAAACATAACCCATAAAATGC	GCCGGGGATGAGCGTTGAAGCAATCCAGGGCATCATCGCCAG	1	-6.4	No	No	Yes	No
	cyaR	nuoA	CTGAAAAACATAACCCATAAAATGC	GTCATCGCTCATCACTGGGCATTCGCTATCTTTCT	1	-6	No	No	Yes	No
	cyaR	glpD	CTGAAAAACATAACCCATAAAATGC	GATATTCATGATGAAAATGGCAAAGCACCGCTGCTGT	1	-3.6	Yes	No	Yes	No
	gadY	maeA	ACGGTTTATTAGTCTGGAGACG	GACTGGGATACCGACAGCGATGTGCTGTCACTGCTGGATGTGGTGC	1	-12.5	No	No	No	Yes
	cyaR	rlmI	CTGAAAAACATAACCCATAAAATGCTAG	TAAAGCCAGCCTCGGTGAAACCATCGATATTGTTGATCATCAGGGAA	1	-6.9	No	No	Yes	No
	cyaR	gdhA	CTGAAAAACATAACCCATAAAATGCTAGCTGTACCAGGA	ACCACCATCGAAGCGACTGAACTGTTCCAGCAGGCAGGCGTACT	1	-13.3	No	No	Yes	No
	sdsR	hupB	TTTTAGCGCACGGCTCTCTCC	TGCTGCAGGGGCTGATATCTCTAAAGCTGCGGCTGGCCGTGCGTTAGATGCTATTATTGCTTCCGTAACTGAATCTCTGAAAGAAGGGGATGATG	3	-24.1	Yes	No	No	Yes
	cyaR	lpxA	CTGAAAAACATAACCCATAAAATGCTA	TATCCGGAAGTGAAAGC	1	-3	No	No	Yes	No
	cyaR	sdhC	CTGAAAAACATAACCCATAAAATGCTAGCTGT	GATGGATTTTGGCTATCTGGAAGAAACATT	1	-6.3	No	No	Yes	No
	cyaR	tig	CTGAAAAACATAACCCATAAAAT	TTGAGGTAACAAGATGCAAGTTTCAGTTGAAACCACTCAAGGCCTTG	1	-5.9	No	No	Yes	No
	cyaR	sxy	CCACCTCCTTAGCCTGTGTAATCTCC	TCGGGGAGGTGGGGATT	1	-18.8	No	No	Yes	No
	arrS	tnaA	AATCCGATTTAAATATCGAGTCTCCTTGTTTCGACTTAAGCTGGCAATTGGATTGCCAGCTTTCTTTT	TATGGCGGCCTGGAAGGCGGCGCGATGGAGCGTCTGGCGGTAGGTCTGTATGACGGCATGAAT	2	-29.8	No	No	Yes	No
	arcZ	tmcA	TCCCTGGTGTTGGCGCAGT	TTTGGTTACACCGGGGAGTTAT	1	-21	Yes	No	Yes	No
	chiX	paaX	AAAGTGACGGCATAATAATAAAAAAATGAAATTCCTCTTTGACGGGCCAATAGCGATATTGGCCATTTTTTTA	ATCACAACAATAACAACAGACTGAAGCGAATGAGTAAA	1	-6.8	No	No	Yes	No
	arcZ	dcuA	TTCCCTGGTGTTGGCGCAGTATTCG	TCTTCTTGGGCGCCAGATTGGGGGGAATAGGTATTGGTTTTGCAGGCGGATTGGGGGTGCTG	1	-22.6	No	No	No	Yes
	arcZ	cysI	TTCCCTGGTGTTGGCGCAGTATTCGCGCACCCCGGTCTA	ATGAAAGCAACTACCTGCGCGGCACCATTGCGG	4	-21.7	No	No	Yes	No
	arcZ	aspA	TTCCCTGGTGTTGGCGCAGTATTCGCGCACCCCGGTCTA	TATCGAAGAAGATCTGTTGGGTACCAGGGAAGTTCCAG	1	-22.9	Yes	No	No	Yes
	sibB	alaS	GAGGGTAGAGCGGGGTTTCCC	AATTATTCCCGCGCTACCACTTC	1	-21.4	No	No	Yes	No
	arrS	gadX	AATCCGATTTAAATATCGAGTCTCCTTGTTTCGACTTAAGCTGGCAATTGGATTGCCAGCTTTCTT	TATGCAGAAATGCTACGTAAAAGAGCATTAATCTTTGCGTTGTTATCTGTTTTTCTTGAGGATGAGCACTTTATACCGCTGCTTCTGAA	2	-20.8	No	Yes	Yes	No
	ryeA	gadX	AAGTCAGCGAAGGAAATGCTTCTGGCTTTTAACAGATAAAAAGAGACCGAACACGATTCCTG	GAGTAGATAAGTGTGTTGAAAATTTTGTATTCGTGTCAAGGGACACGCTTTCATTATTTCTC	1	-16.9	No	No	No	Yes
	ryjB	wbbK	ACTTTTGACGAAGGCGGCAGGGATCGCAGAAGGGTTATTGCTCTTT	TTTAAGAATAACCCTTCTGAGTTGACAATATTTTACCCTGC	3	-28.3	No	No	Yes	No
	arcZ	pqiC	TTCCCTGGTGTTGGCGCAGTATTCGCGCACCCCGGTCTAGCCGGGGTCATTTTT	TTGTCAGTGGTGAGTGGCTGTTGAACCACCAGGGACAACT	3	-33.2	Yes	No	No	Yes
	arrS	rplB	GATTTAAATATCGAGTCTCCTTGTTTCGACTTAAGCTGGCAATTGGATTGCCAGCTTTCTTTTA	AAAGACGGTATCCCGGCAGTTGTTGAACGTCTTGAGTACGATCCGAACCGTTCCGC	1	-26.6	No	No	No	Yes
	chiX	yncL	CATAATAATAAAAAAATGAAATTCCTCTTTGACGGGCCAATAGCGATATTGGCCATTTTTTTA	ATGAGATTTGGCTGGTTTATTTGATGTAGTGATTTTGCACGC	1	-14.2	No	No	Yes	No
	spf	yidC	TAGGGTACAGAGGTAAGATGTTCTATCTTTCAGACC	GTCTGGAAAAACGTGGCCTGCATAGCCGCGAGAAGA	1	-18.5	No	No	Yes	No
	cyaR	ybdR	GCTGTACCAGGAACCACCTCCTTAGCCTGTGTAATCTCCCTTACACGGGCTTATTTTT	ATGGCGGCGTTCCTGGTGGGC	1	-23.1	No	Yes	No	No
	arcZ	kgtP	AGCCGGGGTCATTTTTT	ATGAAACTATAGGTACGTGGGCTCCGGCATTATT	1	-18.8	No	Yes	No	No
	chiX	ade	AAAGTGACGGCATAATAATAAAAAAATGAAATTCCTCTTTGACGGGCCAATAGCGATATTGGCCA	AGTCACGGAATAATAAAAAAA	8	-7.7	No	Yes	Yes	Yes
	chiX	tilS	AAGTGACGGCATAATAATAAAAAAATGAAATTCCTCTTTGACGGGCCAATAGC	AGCGGCGGGCTTGACTCCACCGTTCTGCTGCATCAGTTGGTGCAGTGGCGGACGGAAAATCCGG	1	-18.3	No	No	No	Yes
	cyaR	cadC	CTGAAAAACATAACCCATAAAATGCTAGCTGTACCAGGAACC	TTATCTGGTACAGCGAAGAAGAGGGA	3	-21.9	No	Yes	No	No
	ssrS	lgt	TGCGGCGGCATCTCGGAGATTCCCTTC	TTTCGACACTTACGGTGTGCTGCCGCGCCACCCATCACAGCTTTACGAGCTGCTGCTG	2	-25	No	Yes	No	No
	chiX	chiP	AAAGTGACGGCATAATAATAAAAAAATGAAATTCCTCTTTGACGGGCCAATAGCGATATTGGCCATTTTTTTA	CTTTTTTAATTTTTATTTTTTCGCTGTTCACCTTTGGTGCAGCAATTTATACGTCAAAGAGGATTAACCCATGCGTACGTTTAGTGGCAAACGTAGT	59	-31.1	Yes	Yes	Yes	Yes
	chiX	arcB	AAGTGACGGCATAATAATAAAAAAATGAAATTCCTCTTTGACGGGCCAATAGCGATATTGGCCAT	AAAGAAGAGTGGCGTCACGACGTAGAAGTGCTGAAAGCGTGGGTGGCAAAAGCCACTAAAAAATGACCCCGGCTAGACCGGGGTGCGCGAATACTGCG	3	-22.9	No	No	Yes	Yes
	cyaR	fusA	TTACACGGGCTTATTTTTTA	ATTGAAGCCCGTGGTAAATA	1	-17.8	No	No	Yes	No
	arrS	lpxD	GTAATCCGATTTAAATATCGAGTCTCCTTGTTTCGACTTAAGCTGGCAATTGGATTGCCAGCTTTCTTTTA	CATTGATGACATGAGCAAGCGTCTGAAATCGCTTGAGCGCAAGGTTAATC	1	-24.9	No	Yes	No	No
	rybB	ilvL	CTTTGATGTCCCCATTTTGTGGAGCCCATCAACCCCGCCATTTCGGTTCAAGGTTGATGGGTTTTTTG	TTATCCCACCGTGCGGGGCTGCACTTGGACGAGG	1	-24.7	No	No	Yes	No
	spf	waaU	TAGGGTACAGAGGTAAGATGTTCTATCTTTCAGACCTTTTACTTCAC	TTTCCTTTCTTTTTTAT	1	-4.5	No	No	Yes	No
	cyaR	kgtP	GTACCAGGAACCACCTCCTTAGCCTGTGTAATCTCCCTTACACGGGCTTATTTTTT	TTTGGTGGTTCGGCGGAGTA	1	-16	Yes	No	Yes	No
	omrA	lnt	CGGTACGCTCTTCGTACCCTGTCTCTTGCACCAACCTGCGCGGATGCGCAGGTTTTTTTTC	ATTCGGTGCCTGCGGAACGCTGGCCTTCTCTCCTTACGACGTCTGGCCTG	1	-23.7	No	No	Yes	No
	ryeA	rmf	GATAAAAAGAGACCGAACACGATTCCTGTATTCGGTCCAGGGAAATGGCTCTTGGGAGAGAGCCGTGC	ACGTGGTTATCAGGCCGGCATCGCCGGACGCTCAAAAGAAATGTGTCCCTATCAGACGCTGAA	1	-26.8	No	No	No	Yes
	gcvB	sbp	GCGATTCAGACCATGGTAGCAAAGCTACCTTTTTTCACTTCCTGTACA	CACAACAACAACGATCAGG	1	-4.2	No	No	Yes	No
	gcvB	aceK	GTTTTATCGGAATGCGTGTTCTGGTGAACTTTTGGCTTACGGTTGTGATGTTGTGTTGTTGTGTTTGCAA	CTCCCGAGCGGCTTTTTATC	1	-11	No	Yes	No	No
	arrS	secY	AATCCGATTTAAATATCGAGTCTCCTTGTTTCGACTTAAGCTGGCAATTGGATTGCCAGCTTTCTTTTA	ATTGAAGAAGGCGAACCTGAAAGGCTACGGCCGATAATTGGTCGC	1	-23.7	No	No	Yes	No
	mgrR	tufB	ATTCGTTATCAGTGCAGGAAAATGCCTGTTAGCGTAAAAG	CTCCATCTCCGGTCGTGGTACCGTTGTTACCGGTCGTGT	1	-11.3	No	No	Yes	No
	gcvB	zapA	ACTTCCTGAGCCGGAACGAAAAGT	CAGACCATAGAACAAGCGTTACTTGAACAAGGTCGCATCACCGAAAAAACTAACCAAAACTTTGAATG	1	-6.7	No	Yes	No	No
	arrS	oppB	ATATCGAGTCTCCTTGTTTCGACTTAAGCTGGCAATTGGATTGCCAGCTTTCTT	TTTCGTTCTTTATGATGCGCCTCGCGCCGGGAAGCCCTTTTACCGGCGAACGTACTTTA	1	-18.5	No	No	Yes	No
	cyaR	ydhS	GAAAAACATAACCCATAAAATG	AGTAACAATGAAAAAAAT	1	-1.1	No	No	Yes	No
	sdsR	ygiQ	TTTAGCGCACGGCTCTCTCCC	ATCGCCGTGCGCGTGATCTGAAAGGCATTAAAAAGAT	2	-21.3	No	No	No	Yes
	mgrR	rbsC	AATCTATCCATGCAAGCATTCACCGCCGGTTTACTGGCGGTTTT	TGATTTTGCTGGCGGTGCTGGTAGACAACAA	1	-22.7	No	No	Yes	No
	arcZ	lysR	TTCCCTGGTGTTGGCGCAGTATT	TTGTCAGCGCCGCAGAAAGTCTGCGCGAGTTTCGCCAGGGAGAACTG	8	-29.7	Yes	Yes	Yes	No
	arcZ	yjjV	TTCCCTGGTGTTGGCGCAGTATTCGCGCACCCCGGTCT	TCTCTTGAGCAGCTACA	1	-6.1	No	No	Yes	No
	gcvB	wzxE	GTTGTTGTGTTTGCAATTGGTCTGCGATTCAGACCATGGTAGCAAAGCTACCTTTTTTCACTTCCTGTACAT	TTTGCTATCTGGCTGCTGTTGTCGAATAAATTTACC	1	-23.2	No	No	Yes	No
	gcvB	ldcC	TACCCTGTCTGTCCATAGT	CGCTCTTACGATCTCAA	1	-1.1	No	No	Yes	No
	gcvB	mltC	TACCCTGTCTGTCCATAGTGA	TTCGATGACGGTACGATTACTAT	1	-7.5	No	No	Yes	No
	gcvB	yggX	TTCTGGTGAACTTTTGGCTTACGGTTGTGATGTTGTGTTGTTGTGTTTGCAATTGGTCTGCGATTCAGACCATGGTAGCAAAGCTACCTTTTTTCACTTCCTGTACATTTACCCTGTCTGTCCATAGTGATTAATGTAGCACCGCCTA	TAAAAACAGTGCCGGAGCACGCCTCCGGCAACTTGCATAAAAACAAACACAACACGCACCCGGAA	10	-40.2	No	Yes	No	No
	omrB	rmf	CCCAGAGGTATTGATAGGTGAAGTC	AAAGGTCACAATGGCTGGGAGGCTGGCGAGAAGCCATGGCGGACAGGGTAGTAA	1	-12.4	No	No	Yes	No
	omrB	ycfJ	CCCAGAGGTATTGATAGGTGAAGT	GAATAACAAAGTATAACAAGGCTGTACTCTGCAATTTGGCCCCTCATTCGC	1	-10.6	No	No	Yes	No
	omrB	hda	CCCAGAGGTATTGATAGGTGAAGTCAACTTCGGGTTGAGC	AGCGGTTACATCTATCTCTGGGCACGC	1	-18.6	Yes	No	Yes	No
	gcvB	yliF	TTCTGGTGAACTTTTGGCTTACGGTTGTGATGTTGTGTTGTTGTGTT	TATTTTCTTTGCCGCATTGGT	1	-6.8	No	No	Yes	No
	spf	rpoS	ATCGGATTTGGCTGAATATTTTAGCCGCCCCAGTCAGT	GGAACCCAGTGATAACGATTTGGCCGAAGAGGAACTGTTATCGCAGGGAGCCACACAGCGTGTGTTGGAC	1	-15.4	No	No	No	Yes
	spf	mreC	GTTCTATCTTTCAGACCTTTTACTTCACGTAATCGGATTTGGCTGAATATTTTAGCCGCCCCAGTCAGT	TATTATTGCCGACAGCCGCCTGGGGACGTTCAGTCAAATCCGTACT	7	-34.2	No	Yes	Yes	No
	arrS	speG	AATATCGAGTCTCCTTGTTTCGACTTAAGCTGGCAATTGGATTGCCAGCTTTCTTTT	CAATAGCATTAATAATAATCGATC	1	-7.1	No	No	No	Yes
	gcvB	gltP	CGAAAAGTTTTATCGGAATGCGTGTTCTGGTGAACTTTTGGCTTA	TGCGGTGACGGTGGCTAACTTTGGTTTCTCGTCTCTG	1	-11.7	Yes	No	Yes	No
	omrA	dctR	ATTATTCGGTACGCTCTTCGTACCCTGTCTCTTGCACCAACCTGCGCGGATGCGCAGGTTTTTT	CCAGGAGTCGGTTATGTTTCTTATAATTACCAGGGATACGATGTT	1	-18.2	No	No	No	Yes
	gcvB	csiE	TGTTCTGGTGAACTTTTGGCTTACGGTTGTGATG	TTGTTTGCCATCGGTATTGATAATACCCTGCCGGAAGAGTTCGCCAGACTGT	1	-28.3	No	No	Yes	No
	gadY	sufB	CGGCAGACTATCCTCTTCCCGGTCCCCTATGCCGGGTTTTTTTT	AAATATCTCGGCACCGTGGTGCCGGGGAATGACAACTTCTTTGCCGCGCTTAATGCGGCGGTA	1	-36.6	No	No	No	Yes
	rnpB	pbpC	AAGGGTGAAAGGGTGCGGTA	TAACGTTGGCAGCCGCGCCCTTTCTCC	1	-28.2	No	No	Yes	No
	ryeA	yajG	GTATTCGGTCCAGGGAAATGGCTCTTGGG	TAAGAGTCTCTGAGAGCCCGAACATGTTCAAAAAAA	1	-18.2	No	No	No	Yes
	sdsR	yhaL	TTTTAGCGCACGGCTCTCTC	AAAAATTGGCCAAAAAGCGCCAGCCGG	1	-11	No	No	Yes	No
	spf	erpA	TTTCAGACCTTTTACTTCAC	CCAACCCGAACGCGAAAAGCACCTGCGGTTGCGGTTCTTCCTTTAGTATCTAATCTGTTGTTCATGT	1	-5.5	No	No	Yes	No
	arrS	fimD	AATATCGAGTCTCCTTGTTTCGACTTAAGCTGGCAATTGGATTGCCAGCTTTCTTTTA	ATCGTTTGGCTGGTTTTTTTGTCCGACTCGTTGTCGCCTGTGCTTTTGCCGCACAGGCACCTT	1	-26.8	No	Yes	Yes	No
	chiX	ftsY	AAGTGACGGCATAATAATAAAAAAATGAAATTCCTCTTTGACGGGCCAATAGCGATATTGGCCATTTTTTTA	GAAGAGCTGGAAACGGCGCTGGCTGCCGAAGCGGCAGAAGAGGCGGTGATGGTGGTTCCTCC	1	-29.1	No	No	Yes	No
	arcZ	garK	TTCCCTGGTGTTGGCGCAGTATTCGCGCACCCCGGTCTA	ATGATTGCAGCCACCCAGGGGG	5	-25.4	No	No	Yes	No
	ryeA	malM	TGGGAGAGAGCCGTGCGCTAAAAGTTGGCATTAATGCAGGCTTAGTTGCCTTGCCCTTT	ATCAGCAGTGTAAAAGGCAAGGGGTAATTACGCCCCACAGTGCTGATTTTGCAACAACTGGTGCGTCTCCTGGCGCACCTTTTTTT	1	-45.9	No	No	Yes	No
	omrB	yhbT	AGAGGTATTGATAGGTGAAGT	TTGTTGAAACAGGGAGTAAAACTCGTGTTGGATAAACTGCGT	1	-3.4	No	No	No	Yes
	arcZ	yebC	TTTCCCTGGTGTTGGCGCAGTATTCGCGCACCCCGGTCTAGCCGGGGTCATTTTTTA	TCATAGTAAATGGGCCAACACCAGACATCGT	5	-26.1	No	No	Yes	No
	cyaR	nadA	CTGAAAAACATAACCCATAAAATGC	AAAGAGTTACTGGAAGCACCAACCGCAGGTGAGGGTGCAA	1	-8.6	No	No	Yes	No
	chiX	rplN	AAAGTGACGGCATAATAATAAAAAAATGAAATTCCTCTTTGACG	GCCGACAACTCCGGTGCACGTCG	1	-11.4	No	No	Yes	No
	omrA	dcuA	ATTATTCGGTACGCTCTTCGTACCCTGTCTCTTGCACCAACCTGCGCGGATGCGCAGGT	TTGCTGGCGATCTTCTTGGGCGCCAGATTGGGGGGAATAGGTATTGGTTTTGCAGGCGGATTGGGGGTGCTGGT	1	-41.9	No	Yes	No	No
	gadY	ylaB	GGGAGTGTTATAACGGTTTATTAG	TTACCGCTCGGGTTGGTGATTGGCCTGCTGGCAGCGATGTTTGTGCTGCGTATTTTGCGC	1	-7.7	No	No	No	Yes
	arrS	ychA	GTAATCCGATTTAAATATCGAGTCTCCTTGTTTCGACTTAAGCTGGCAATTGGATTGCCAGCTTTCTTTT	GGTGTTAAAGAATCGACAGGGCAGTGCGGTATCATTAGGTGCGGTTTTATTATGGGTCGCGAAT	1	-25.2	No	No	No	Yes
	rybB	glf	GCCACTGCTTTTCTTTGATGTCCCCATTTTGTGGAGCCCATCAACCCCGCCATTTCGGTTCAAGGTTGATGGGTTTTTTGT	TTATACGGAGAAGCAGTGGG	1	-22	No	No	Yes	No
	ryeA	fxsA	TGCTTCTGGCTTTTAACAGATAAAAAGAGACCGAACACGATTCCTGTATTCGGTCCAGGGAAATGGCTCTTGGG	GTGAAGTTGATGCCGCATTTGCGCTTTTCTCGCATGCCTGGCGGCGGTTT	1	-20.5	No	No	No	Yes
	gcvB	cohE	GGTTGTGATGTTGTGTTGTTGTGT	AAGAACACCAGACAACGAACATCACAAAAAAACC	1	-22.8	No	No	Yes	No
	gcvB	aceK	AATTGCGGTGCTTTTTTT	CGCGGCATTTTTACTAC	1	-7.4	No	No	Yes	No
	arrS	nlpC	GTAATCCGATTTAAATATCGAGTCTCCTTGTTTCGACTTAAGCTGGCAATTGGATTGCCAGCTTTCTTTT	ATAAAGCACCGCCGCCAAATGCCAGACTTTCTGATTCGA	1	-27.3	No	No	No	Yes
	cyaR	mdh	CTGAAAAACATAACCCATAAAATGCTAGCTGTACCAGGAACCA	AAAAACCTGGTACAGCAAGTTGCG	4	-24.5	Yes	Yes	Yes	No
	ryeA	zapA	TGCGTGCAAAATGGTCAATAAAAAGCGTGGTGGTCATCAGCTGAAATGTTAAAAACCGCCCGTTCTGGT	TAGAACAAGCGTTACTTGAACAAG	1	-11.3	No	No	No	Yes
	chiX	thrL	AAGTGACGGCATAATAATAAAAAAATGAAATTCCTCTTTGACGGGCCAATAGCGATATTGGCCATTTTTTTA	ATAGCGCACAGACAGATAAAAATTACAGAGTACACAACATCCATGAAACGCATTAGCACCACCA	2	-11.3	No	Yes	No	Yes
	arcZ	atoS	TTCCCTGGTGTTGGCGCAGTATTCGCGCACCCCGGTCTAG	GATCTTGCGCCAACAAACCAGTGACCC	1	-25.4	No	No	Yes	No
	spf	lolE	TAGGGTACAGAGGTAAGATGTTCTATCTTTCAGACCTTTTACTTCACG	GCCAGTAATATTGACCCTGCGCGAGTCCTTAGCGGCCAGTAAAGGCAGTACATTAAAACAAGGAGCGGCAATGT	1	-12.3	No	No	Yes	No
	chiX	cydB	AAAGTGACGGCATAATAATAAAAAAATGAAATTCCTCTTTGACGGGCCAATAGCGATATTGGCCATTTTTTTA	TCCTCGTGCTGGCGTCTTTGTTCTTCCGTCCGGTCGGTTTTGAC	1	-19.7	No	No	No	Yes
	gadY	ylaC	TCCCGTGCCAACAGGGAGTGTTATAACGGTTTATTAGTCTGGAGACGGC	TACGTTGCTTTTTTTGCCACCCTGGCGGTGATGTTGCAG	1	-17.2	No	No	Yes	No
	gcvB	cstA	TTTTCACTTCCTGTACATTTACCCTGTCTGTCCATAGTGATTAATGTAGCACCGCCTAATTGCGGTGCTTTTTTTT	AGAAACAAAATGTAACATCTCTATGGACACGCACACGGATAACAACTATGAACAAATCAGGGAAATACCTCGTCTGGACAGTGCTCTCTGTAATGGGAGCATTTGCTCT	7	-31.5	Yes	Yes	Yes	No
	arcZ	ydcI	TTCCCTGGTGTTGGCGCAGTATTCGCGCACCCCGGTCT	TTCATCGTAAAGAAGGTCTTAATAATGATGTCGTCAGGGTTGGTGCACTACCTACTGCGGCACTGGGGATATTACCTT	8	-35.8	Yes	No	Yes	Yes
	rybB	yqjA	TTTTGTGGAGCCCATCAACCCCGCCATTT	GCGAAAGGCGCGATGGGCTATCCGCAAACGAT	4	-28.1	No	No	No	Yes
	chiX	sthA	ACGGCATAATAATAAAAAAATGAAATTCCTCTTTGACGGGCCAATAGCGATATTGGCCATTTTTTT	CAGTGGCGTAGTGATTCGTCACAACGAAGAGTACGAG	1	-19.4	No	Yes	No	No
	chiX	zapC	AAAGTGACGGCATAATAATAAAAAAATGAAATTCCTCTTTGACGGGCCAATAGCGATATTGGCCATTTTTTTA	ATGAACGACAGGCTGAAACCGCAGGTTAATGTTGACAGCTTCAGCCTCGAACAGGCAGTCTAA	1	-22.9	No	Yes	No	No
	gcvB	alaE	CTTCCTGAGCCGGAACGAAAAGTTTTATCGGAATGCGTGTT	GTTTAAAGTCAGCCGTTACCAGCAGGTAAAAGCCTGACT	1	-10.6	No	No	Yes	No
	mgrR	ycbZ	CCATGCAAGCATTCACCGCCGGTT	CTTTGACCATTACGAAACTTGCATGGCGTGA	1	-17	Yes	Yes	No	No
	psrD	acpP	TCAGATATAGCGTATTGATGATAG	GCAGGAAGAAGTTACCAACAATGCTTCTTTCG	1	-7.4	No	No	Yes	No
	arcZ	aceK	TAGCCGGGGTCATTTTT	ACGTTGGTCTGGTCGTGGAGCAACTGCGCTGCATTACTA	2	-7.8	No	No	No	Yes
	omrA	ygiV	TCCCAGAGGTATTGATTGGTGAGATTATTCGGTACGCTCTTCGTACCCTGTCTCTTGC	CATTATCGATTTCCCATCAATACCTGTGGCGAT	9	-30.5	No	No	Yes	Yes
	mgrR	atpA	AAGCATTCACCGCCGGTTT	TTCCGTGACCGCGGTGAAGATGCGCTGATCATTTACG	4	-21.3	No	Yes	No	No
	cyaR	rpoB	GCTGAAAAACATAACCCATAAAATGCTAGCTGTACCAGGAACCACCTCCTTAGCCTGTGTAATCTCCCTTACACGGGCTTATTTTTT	TTACCGTGGTTCCTGGCTGGACT	6	-23.5	No	Yes	Yes	No
	omrA	ilvL	TATTCGGTACGCTCTTCGTACCCTGTCTCTTGCACCAACCTGCGCGGATGCGCAGGTTTTTTTTC	TTCCTTCGAACAAGATGCAAGAAAAGACAAAATGACAGCCCTTCTACGAGTGATTA	1	-21.7	No	No	No	Yes
	arcZ	osmB	AGCCGGGGTCATTTTTTAG	TTTGTAACGAGCAAAAAAATGACCGCGGCTGTTCTGGCAA	3	-25.6	No	No	Yes	No
	ryeA	rplQ	GCTTCTGGCTTTTAACAGATAAAAAGAGACCGAACACGATTCCTGTATTCGGTCCAGGGAAATGGCTCTTGGG	TTCTGAAGTGTGGCTTCCGTGCAGGCGACAACGCGCCGATGGCTTACATCGAGCTGGTTGA	1	-26.2	No	Yes	No	No
	chiX	ygiN	AATAATAAAAAAATGAAATTCCTCTTTGACGGGCCAATAGCGATATTGGCCATTTTTTTA	CTGCAGCCAGGGATTTAATCCT	1	-11.6	No	No	Yes	No
	oxyS	ompN	CCTTGAAGTCACTGCCCGTTTCGAGAGTTTCTCAACTCGA	TTGAAGTCACTGCACAG	1	-4.6	No	No	No	Yes
	arrS	preT	AATATCGAGTCTCCTTGTTTCGACTTAAGCTGGCAATTGGATTGCCAGCTTTCTT	TTGGCGCAGGTCCTGCCGGATTGCAG	1	-19.5	No	No	No	Yes
	arrS	fdoG	GTAATCCGATTTAAATATCGAGTCTCCTTGTTTCGACTTAAGCTGGCAATTGGATTGCCAGCTTTCTTTTA	CACACGCAGCAAGCGAATGTAAATGGGACGTGACAATGTCGAAACAAGGAGCAATCCAT	435	-32.5	No	Yes	Yes	Yes
	arcZ	yiiM	TTTCCCTGGTGTTGGCGCAGTATTCGCGCACCCCGGTCTA	TAGCGCCAGGGAAAGTGT	1	-22.8	No	No	Yes	No
	cyaR	fusA	AAAATGCTAGCTGTACCAGGAACCACCTCCTT	TCTGGTGGTCGTGGTCAGTATGGT	2	-25.2	No	Yes	No	No
	rprA	holA	TGCTGTGTGTAGTCTTTGCCCATCTCCCA	ATGGCAGAACCGCCGGGGCATGATGGGCGAGGC	19	-23.3	No	No	No	Yes
	gadY	ompF	AAGTTTCCCGTGCCAACAGGGAGTGTTATAACGGTTTATTAGTCTGGAGACGG	TATGCCCGTCTTGGTTTTAAA	1	-10.9	No	No	Yes	No
	arcZ	yfcF	TTCCCTGGTGTTGGCGCAGTATTCGCGCACCCCGGTCTA	AAGATCGATTTGCGCCACCGACCTGGGAACG	2	-29.6	No	No	Yes	No
	sdsR	atpI	AACTTTTAGCGCACGGCTCTCTCCCAAGAGCCATTTCCCTGGACCGAATACAGGAATCGTGT	GTTACTGGTGGTGGCGTTGGCGGTTTTAAAGGCGGTATTCTTGCCGCTGA	1	-25.4	No	No	No	Yes
	sdsR	ftsI	AACTTTTAGCGCACGGCTCTCTCCCAAGAGCCATTTCCCTGGACCGAATACAGGAATCGTGT	TGGGGTTGGTCGGAGAACGCAGTGGCTTATATCCTCAAAAACAACGGTGGTCTGACATAGAGAGGGCCACCTTCT	1	-34	No	No	No	Yes
	arrS	gatA	AATCCGATTTAAATATCGAGTCTCCTTGTTTCGACTTAAGCTGGCAATTGGATTGCCAGCTTTCTTTT	TTATCTGTTAAGGCCAACAAATAAAGTTCATTTTC	1	-8	No	No	Yes	No
	omrB	rpsI	CACATGAATTACACCAGCCTGCGCAGATG	AAAGGTGGTGGTATCTCTGGTCAGGCTGGTGCGATCCGTCACGGTATCA	2	-28.8	No	No	Yes	No
	arcZ	yjfY	TTCCCTGGTGTTGGCGCAGTATTCGCGCACCCCGGTCTA	ATTCTGATGCGGGAACCGGGGAGTAACGG	7	-23	Yes	No	Yes	No
	chiX	ydeJ	TGACGGCATAATAATAAAAAAATGAAATTCCTCTTTGACGGGCCAATAGCGATATTGGCCATTTTTTT	CATTAATAGAGATAAAATTGTACAACTTGTAGATA	1	-5.1	No	No	No	Yes
	cyaR	lysP	AAAATGCTAGCTGTACCAGGAACCACCTCCTTAGCCTGTGTAATCTCC	CGATGATTGCCATTGGCGGTTCCATCGGTACAGG	3	-30.5	Yes	No	Yes	No
	chiX	yeaJ	ACGGCATAATAATAAAAAAATGAAATTCCTCTTTGACGGGCCAATAGCGATATTGGCCATTTT	TCCATGACTTACCGGGCGGCATTCGTGTCTCGTTATCCATTGATATTCTTTACTTTATCAC	1	-18	No	Yes	No	No
	chiX	bglA	GCATAATAATAAAAAAATGAAATTCCTCTTTGACGGGCCAATAGCGATATTGG	CCCGTCCTATGTGTTGAACGAGTGG	1	-10.7	No	No	No	Yes
	arcZ	ycjD	TTTCCCTGGTGTTGGCGCAGTATTCGCGCACCCCGGTCT	TTTCAAATTTCGCCGTCAACATCCAGTGGGGAGCTACATT	8	-23.5	No	Yes	Yes	No
	mgrR	ahpF	ATTCGTTATCAGTGCAGGAAAATGCCTG	ATGGGCGAGATTATCATTGATGCGAAATGCGAAACCAACGTGA	1	-17.6	No	No	Yes	No
	arcZ	glyQ	TTCCCTGGTGTTGGCGCAGTATTCGCGCACCCCGGTCT	CCTTACAGGATTACTGGGCTCGCCAGGG	2	-28.9	Yes	No	No	Yes
	spf	cohE	TAGGGTACAGAGGTAAGATGTTCTATC	TATCCCTGCCCTGTACCCTGTGG	3	-23.5	No	Yes	No	No
	arcZ	gadA	CTGGTGTTGGCGCAGTATTCGCGCACCCCGGTC	CGATCAGTGCTTCAGGCCATAAATTCGGTCTGGCTCCGCTGGGCTGCGGCTGGGTTATCTGGCGTGA	1	-25	No	No	No	Yes
	spf	sdhD	GAGGTAAGATGTTCTATCTTTCAGACCTTTTACTTCACG	TTTATGGATTCGTTGTGGTGTGGGGTGTGTGATGA	1	-15.5	No	No	Yes	No
	gadY	yeaQ	AGTCTGGAGACGGCAGACTATCCTCTTCCCGGTCCCCTATGCCGGGTTTTTTTTATG	CTGGGGATAGTCGGTGCCGTAGTCG	1	-27	No	No	Yes	No
	ffs	pyrL	CGGGATGTAGCTGGCAGGGC	CATTTTGTCTTACCGCGTCTGAAAAAAGACGCTGGCCTGCCGTTTTTCTTCCCGTTGATCACC	1	-22.4	No	Yes	No	No
	gcvB	atpG	TTTATCGGAATGCGTGTTCTGGTGAACTTTTGGCTTACGGTTGTGA	AAGATCGCAAGCGTCCAGAACACGCAAAAG	1	-30.7	No	No	Yes	No
	gcvB	malM	AGCAAAGCTACCTTTTTTCACTTCCTGTACATTTACCCTGTCTGTCCATAGTGA	TTTATCAGCAGTGTAAAAGGCAAGGGGTAATT	1	-15.8	No	Yes	No	Yes
	arrS	gcd	AATCCGATTTAAATATCGAGTCTCCTTGTTTCGACTTAAGCTGGCAATTGGATTGCCAGCTTTCTT	CGTCTGGCGTGATCCGTGGTTTTGATGTCAACACCGGGGAGCTGCTGTG	1	-28.2	No	Yes	No	No
	gcvB	iscU	TATCGGAATGCGTGTTCTGGTGAACTTTTGGCTTACGGTTGTGATG	CGATATTGCTGAAGAACTTG	1	-7.3	No	No	Yes	No
	arrS	yfaY	GTAATCCGATTTAAATATCGAGTCTCCTTGTTTCGACTTAAGCTGGCAATTGGATTGCCAGCTTTCTTTTA	AAAAGTGGAAATGTTATCCACCGGGGATGAAG	1	-12.9	No	No	Yes	No
	arcZ	plsB	TTCCCTGGTGTTGGCGCAGTATTCGCGCACCCCGGTCTA	TTTCTTACGTGCTGTATCACCAGGGGCTGGTGC	11	-24.5	Yes	Yes	Yes	No
	ryeA	tesA	GAAGGAAATGCTTCTGGCTTTTAACAGATAAAAAGAGACCGAACACG	GCCGCAGCGGACACGTTATTGATTCTGGGTGATAGCCTGAGCGCCGGGTATCGAATGTCTGCCAGCGCGGCCTG	2	-20.3	No	No	Yes	Yes
	arrS	kgtP	AATATCGAGTCTCCTTGTTTCGACTTAAGCTGGCAATTGGATTGCCAGCTTTCTTTTA	ACACCATGGAAGACGCTGCACTCAGAGAGTGGGGATGGCGTATTCCTTTCGCGTTAGGAGCT	1	-23.5	Yes	No	No	Yes
	gcvB	queG	TTTATCGGAATGCGTGTTCTGGTGAACTTTTGGCTTACGGTTGTGA	CACTTCTCGATGAGCACATAGCGTGGGCGATTG	1	-18	No	Yes	No	No
	gcvB	radA	CGTGTTCTGGTGAACTTTTGGCTTACGGTTGTGAT	TTAACGAGGTACACCGTGGCAAAAGCTCCAAAACGCGCCTTTGT	15	-24.4	No	Yes	No	No
	arcZ	mtfA	AGCCGGGGTCATTTTTT	ATGATTAAGTGGCCCTGGAAAGTACAA	1	-19.6	No	No	No	Yes
	mgrR	pyrG	TAAAAGCAAAACACAAATCTATCCATGCAAGCATTCACCGCCGGTTTAC	CAACGAACTATATTTTTGTGACCGGCGGGGTCGTATCCTCTC	25	-19.1	No	Yes	Yes	No
	sdsR	yddA	ACTTTTAGCGCACGGCTCTCTC	ATTCTCTTACTGATCAGCAAAACGCTC	1	-7.9	No	No	No	Yes
	spf	lpp	TTTTAGCCGCCCCAGTCAGTA	TAATGAAAGCTACTAAACTGGTACTGGGCGCGGTAATC	4	-24.1	No	No	Yes	No
	arcZ	arsB	GCCGGGGTCATTTTTTA	TATCATGACCCTGCCTGTGCTGTTTGTGACGC	1	-14.6	No	No	No	Yes
	cyaR	cmk	TGAAAAACATAACCCATAAAATGCTAGC	CCATTGATGGCCCAAGCGGTGCAGGGAAAGGCACCTTGTGTAAGGCTATGGCGGAAGCGTTGCAATGG	1	-12	No	Yes	No	No
	dsrA	ftsB	CAAGTTTCATCCCGACCCC	TTTTCAGGGGGCAGGATGGGTAAACTAAC	3	-16.9	No	Yes	No	No
	arrS	ompC	GTAATCCGATTTAAATATCGAGTCTCCTTGTTTCGACTTAAGCTGGCAATTGGATTGCCAGCTTTCTTTT	ACTACAAAATCAACCTGCTGGACGACAACCAGTTCACTCGTGACGCTGGCATCAACACTGAT	1	-24.7	No	No	No	Yes
	mgrR	mscS	GATTCGTTATCAGTGCAGGAAAATGCCTGTTAGCGTAAAAGCAAAACACAAATCTAT	TATCGCCTTTACGCTAATCGCTGCACTGGGAC	1	-29.2	Yes	No	No	Yes
	chiX	ftsK	AAGTGACGGCATAATAATAAAAAAATGAAATTCCTCTTTGACGGGCCAATAGC	GCAGCCGCAACAACCGGTTGCGCCACAGCAGC	3	-10.2	No	No	Yes	No
	arrS	guaC	GTAATCCGATTTAAATATCGAGTCTCCTTGTTTCGACTTAAGCTGGCAATTGGATTGCCAGCTTTCTTT	AACGCTCCACTCTTAAAAGCCGTTCCGATGTTGAACTGGAACGTCAATTCACCT	1	-18.5	No	No	Yes	No
	cyaR	miaA	GCTGTACCAGGAACCACCTCCTTAGCCTGTGTAATCTCC	ACCTGGCTGCGTGGTTGGGAAGGGGTTCACTGGCTT	3	-30	No	No	Yes	No
	sroH	gadA	GCGTTCTGAATACCAGAGATAATTCTCTGGCGAAACCCACCTTAAGGTGGGTTTTGTT	AGACCTGGGACGACGAAAACGTC	1	-8.6	No	No	No	Yes
	chiX	ompC	AAGTGACGGCATAATAATAAAAAAATGAAATTCCTCTTTGACGGGCCAATAGCGATATTGGCCAT	TAGCTCTGGGTCTGGTTTACCAGTTCTAATCTCGATTGATATCGAACAAAGGGCCTGCGGGCCCTTTTT	1	-21.8	No	No	Yes	No
	omrA	prmB	AGAGGTATTGATTGGTGAGATTATTCGGTACGCTCTTCGTACCCTGTCTC	AAAGAGCAGCTTATTGCCGCACGAGAACATTTCGCGATTT	1	-15.3	No	No	No	Yes
	arcZ	yciW	TTTCCCTGGTGTTGGCGCAGTATTC	ATTCCACCAGGGAAAGT	16	-19.8	No	No	Yes	Yes
	dsrA	yaiW	AGTGCTTCTTGCTTAAGCAAGTTTCATCCCGACCCC	CGTTCCGGGCTTAAGCAAGA	1	-19.5	No	No	Yes	No
	sdsR	tolB	AACTTTTAGCGCACGGCTCTCTCCCAAGAG	GCTCTTCTCAGGGGATGGGATCCGTGCTGAATTTGGTTT	5	-27.4	No	No	Yes	Yes
	sgrS	ileS	GAGTATTGGTGTAAAATCACCCGCCAGCAGATTA	CCACCACGCCGTGGACTCTGC	1	-11.7	No	No	Yes	No
	arrS	yqjA	GTAATCCGATTTAAATATCGAGTCTCCTTGTTTCGACTTAAGCTGGCAATTGGATTGCCAGCTTTCTT	ATGAATGGAACTTTTGACCCAATTGCTGCAAGCCCTGTGGGCGCAGGA	1	-25.1	No	No	Yes	No
	mgrR	sucC	GATTCGTTATCAGTGCAGGAAAATGCCTGTTAGCGTAAA	ATGGCCAACCGGTTAACCAGATTCTG	1	-9.7	No	No	Yes	No
	gcvB	insG	TTGCAATTGGTCTGCGATTCAGACCATGGTAGCAAAGCTACCTTTTTTCACT	GATCAGTTGACCGATCCAGTGGCTGTGTAAGAATCCGGAAACGCTCACTTGTTTCCGGATTTTTTT	1	-18.3	No	Yes	No	No
	gadY	clpP	GAGTGTTATAACGGTTTATTAGTCTGGAGACGGCAGACTATCCTCTTCCCGGTCCCCTATGCCGGGTTTTTTTT	ACAGATTGAACGTGATACCGAGCGCGATCGCTTCCTTTCCGCCCCTGAAG	1	-18.5	No	No	Yes	No
	mgrR	garD	GATTCGTTATCAGTGCAGG	GGTGAAATTATTCGTTAT	1	-3.2	No	No	Yes	No
	ryeA	rarD	GATAAAAAGAGACCGAACACGATTCCTGTATTCGGTCCAGGGAAATGGCTCTTGGGAGAGAGCCGTGCGCTAAA	CAATGGCTGGCGGTGATTCTGGCGATATGTGGCGTGTTAGTCCAGCTGTGGACTT	1	-31.2	No	No	Yes	No
	cyaR	aceK	CTGAAAAACATAACCCATAAAATG	CCCGGCATTAATGGAATTACTGCTTCAGGAAGCAGCGGAAAAAATC	1	-8	No	No	Yes	No
	mgrR	ucpA	AAAAGCAAAACACAAATCTATCCATGCAAGCATTCACCGCCGGTTTACTGGCGGTTTTTT	ACTGCCGGAGACGGTTAGCGTCGGTATCTGATTCACCTCTGTTTCCTCCCTGCATTTGTGGGGAGGATTTCG	1	-28.2	No	Yes	No	No
	cyaR	ynaI	CTGAAAAACATAACCCATAAAATGC	TGTACGTGAGATGCTGAAAA	1	-2.1	No	No	Yes	No
	cyaR	dnaK	CTGAAAAACATAACCCATAAAATGC	GAAGTGCTGAAAAAAAT	1	-1	Yes	No	Yes	No
	cyaR	yoaK	CTGAAAAACATAACCCATAAAATGC	TGGTTTTTTATTGGCGGCTATGCTGCCCCGGGA	1	-7.2	No	No	Yes	No
	cyaR	fecA	CTGAAAAACATAACCCATAAAATGCTAG	CCAGTCCAGCCAGTTTGCGGATAA	1	-5.5	No	No	Yes	No
	cyaR	torS	CTGAAAAACATAACCCATAAAATGC	CCATTGAGATGCTGAAA	1	-2.2	No	No	Yes	No
	gadY	kptA	TTCCCGTGCCAACAGGGAGTGTTATAACGGTTTATTAGTCTGGAGACGGCAGACTA	AGCCGTTTCCTTGACGAGATAAAAAAACAGGGGCTGATTGCA	7	-28.6	No	No	No	Yes
	ryeA	aceB	AAGTCAGCGAAGGAAATGCTTCTGGCTTTTAACAGATAAAAA	ACTGGCCCGGTAGAGCGCAAGATGGTGATCAACGCGCTCAACGCCAATGTGAAAGTCTTTATGGCCGATTTCG	1	-13.6	No	Yes	No	No
	cyaR	ilvL	CTGAAAAACATAACCCATAAAATGC	CTTCGAACAAGATGCAAGAAAAGACAAAATGACAGCCCTTCTACGA	2	-1.7	No	Yes	Yes	No
	cyaR	mgtA	CTGAAAAACATAACCCATAAAATGC	ATTAAGCGGGTTACTGATACG	1	-8.9	No	No	Yes	No
	omrA	hupB	ATTATTCGGTACGCTCTTCGTACCCTGTCTCTTGCACCAACCTGCGCGGATGCGCAGGTTTTTTT	AAGCTGCGGCTGGCCGTGCGTTAGATGCTATTATTGCTTCCGTAACTGAATCTCTGA	1	-28.8	No	No	Yes	No
	cyaR	fucK	CTGAAAAACATAACCCATAAAATGC	TGTGAAATGCTGAAAACAAT	1	-2.2	No	No	Yes	No
	cyaR	yiaJ	CTGAAAAACATAACCCATAAAATGC	TTTCTAATGAACTGGGATTTACTGTCAGGGATGACCTG	1	-9.2	No	No	Yes	No
	cyaR	aceK	CTGAAAAACATAACCCATAAAATGCTAGC	CCGCGTGGCCTGGAATTATTGATTGCTCA	1	-7.7	No	No	Yes	No
	cyaR	malG	CTGAAAAACATAACCCATAAAATGCTAGCT	TCTTCTTGCTGGCTCAACGCTGGCTGGTCAACGGCCTGACGG	1	-11.7	No	No	Yes	No
	cyaR	wzyE	CTGAAAAACATAACCCATAAAATGCTAGCT	TTCTGCTTTGGGGCGATCTTCAATATGATCGTGCTGGCGCGTG	1	-10.6	No	No	Yes	No
	cyaR	ydgI	CTGAAAAACATAACCCATAAAATGCTAG	GGAACAGGTGAAAAACA	1	-3	No	No	Yes	No
	chiX	dcuA	AAGTGACGGCATAATAATAAAAAAATGAAATTCCTCTTTGACGGGCCAATAGCGATATTGGCCATT	CTTGGGCGCCAGATTGGGGGGAATAGGTATTGGTTTTGCAGGCGGATTGGGGGTGCTGGT	1	-25.7	No	Yes	No	No
	cyaR	aspA	CTGAAAAACATAACCCATAAAATGCTAGCTGT	ACAGTAATCGTACAGGGTAG	1	-9.5	No	No	Yes	No
	cyaR	cysK	CTGAAAAACATAACCCATAAAATGCT	CGAAGGTGGAATCTCGTAACCCCAGC	1	-4.8	No	No	Yes	No
	cyaR	smpB	CTGAAAAACATAACCCATAAAATGCT	GGGGTGTTTTCGATTTCAGATTACCGATGATTCACGACGCTTATGACGA	1	-12	Yes	No	Yes	No
	chiX	yoeB	AAAAAATGAAATTCCTCTTTGACGGGCCAATAGC	ATAATTTGTCAGGTTTCTGGTCCCGAC	1	-12.3	No	No	No	Yes
	cyaR	rplL	CTGAAAAACATAACCCATAAAATGCT	CAAAGCAGTACGTGGCGCAACTGGCCTGGGTCTGAAAGA	1	-8.6	No	No	Yes	No
	chiX	agaD	AAGTGACGGCATAATAATAAAAAAATGAAATTCCTCTTTGACGGGCCAATAGCGATATTGGCCATTT	TGCCGATTATGGCGGGAATTTGCTCATCATTTGCCAGCCAGGGAAACCTGC	1	-22.3	No	No	Yes	No
	cyaR	hns	CTGAAAAACATAACCCATAAAATGCT	TTTGAGATTACTACAATGAGCGAAGCACTTAAAA	1	-3.4	No	No	Yes	No
	gcvB	arcB	TTGTGATGTTGTGTTGTTGTGTTTGCA	GAAAGCGTGGGTGGCAAAAGCCACTAAAAAATGACCCCGGCTAGACC	1	-10.2	No	No	Yes	No
	chiX	mreC	AAGTGACGGCATAATAATAAAAAAATGAAATTCCTCTTTGACGGGCCAATAGCGATATTGGCCATTTTTTTA	TAACTTATGAAGCCAATTTTTAGCCGTGGCCCGTCGCTACAGA	30	-29.2	No	Yes	Yes	Yes
	gcvB	aceB	ACTTCCTGAGCCGGAACGAAAAGTTTTATCG	CTTACTGCCGAAGCGGTAGAATTTCTGACTGAGCTGGTGACGCATTTTACGCCACAAC	1	-15.3	No	No	Yes	No
	arrS	mltA	CGATTTAAATATCGAGTCTCCTTGTTTCGACTTAAGCTGGCAATTGGATTGCCAGCTTTCT	ACTTTGGTGATGGCAGTCCGCTTAACTTTTTCAGCTATGCAGGGAAAAAC	1	-27.7	No	No	Yes	No
	ryjB	ftsZ	TCCGTCGTTGACTCCATGCCGATTCGGGTTAA	TAAAGTCATCGGCGTCGGCGGCGGCGGCGG	3	-29.3	No	Yes	No	No
	arrS	cysK	GTAATCCGATTTAAATATCGAGTCTCCTTGTTTCGACTTAAGCTGGCAATTGGATTGCCAGCTTTCTTTTA	TCTCTTCTGGAGCAGCTGTTGCCGCGGCGTTGAAAC	1	-24.8	No	No	No	Yes
	gcvB	gatB	TAGTGATTAATGTAGCACCGCC	TGGATGGTGTGCATTTGATATGCACCACTGCCAAAGTGGA	1	-15	No	No	Yes	No
	micA	mcrA	GCCACTCACGAGTGGCCTTTTTCTTTT	TTGATAATAATGGAATTGAACTGAAAGCTGAGTGTTCGATAGGTGAAGAGGATGGTGTTTATGGTCT	1	-11.9	No	No	No	Yes
	arcZ	murG	TTTCCCTGGTGTTGGCGCAGTATTCGCGCACCCCGGTCTAGCC	GCCACAGCTTAGCGTGGATGCTGTCGCCAACACC	1	-40.2	No	Yes	No	No
	ryeA	wzyE	GCTTCTGGCTTTTAACAGATAAAAAGAGACCGAACACGATTCCTGTATTCGGTCCAGGGAAATGGCTCTTGGG	TGATCGTGCTGGCGCGTGAAGGGCTGGATTCGTTTGTCTCACGCGTGGTCTTTT	1	-26.8	No	No	No	Yes
	cyaR	trkG	CTGAAAAACATAACCCATAAAATGCTAGCTGTACCAGGAACCACCTCCTTAGCCTGTGTAATCTCCCTTACACGGGCTTATTTTTTA	TTACTCATATGTGTGGGTTCCTGGTTTGGCTCTATAGTCTTTCAATGTTGCCACCAATGGTTGT	27	-29	Yes	Yes	Yes	No
	omrB	ydgD	CAGAGGTATTGATAGGTGAAGTCAAC	ACCAGACGTTGCCAGATCGGCAAACGATG	1	-11.2	No	No	Yes	No
	omrB	clpB	CAGAGGTATTGATAGGTGAAGT	GGATGACCTCATTTAATCTCCAGTAGCAACTTTGATCCGTTATGGGAGGAGTTATGCGTCTGGATCGTCTTA	1	-12.7	No	No	Yes	No
	chiX	cspE	AAGTGACGGCATAATAATAAAAAAATGAAATTCCTCTTTGACGGGCCAATAGCGATATTGGCCATTTTTTTA	TGTAAAGGTAATTTTGATGTCTAAGATTAAAGGTAACGTTAAGTGGTTTAATGAGTCCAAAGGAT	2	-16.1	No	No	Yes	Yes
	arcZ	yqeC	TTTCCCTGGTGTTGGCGCAGTATTC	TTTGTTTTCACAGCTGGAAAGCGAACCAGGGAAAAGT	4	-23.5	Yes	No	Yes	Yes
	arcZ	mntH	TTTCCCTGGTGTTGGCGC	CGCTCACTCAGCATTTACATGGC	1	-9.6	No	No	No	Yes
	ryeA	yfeS	AGATAAAAAGAGACCGAACACGATTCCTGTATTCGGTCCAGGGAAATG	AATAAATTTTGGTGGATAGATTACGAAGGGGATAGTTTAGCTGTCAACTATGGCAAGGTAGGTAGT	1	-20.7	No	No	Yes	No
	sroH	holA	CTTCCAGGATGCAGCAGACTGAAGAAATT	CTTCAGCAACTGCGTCTGGAAGGCAGCGAACCGGTTAT	24	-28.3	No	No	No	Yes
	gadY	rarD	TGTTATAACGGTTTATTAGTCTGG	GTGATCTGGTCGTTTTTCTTTATGGTGGT	1	-4.3	No	No	Yes	No
	arcZ	zwf	ACAGTGCTGTGCCCTTGTAACTCATCATAATAATTTACGG	ACCGTATCAGGCCGGAACCTGGGGACCCGTTGCCTCGGTGGCGATGATTACCCGTGATGGTCGTTCCTG	1	-14.4	No	No	Yes	No
	gcvB	thrL	GGTTGTGATGTTGTGTTGTTGTGTTTGCAATTGGTCTGCGATTCAGACCATGGTAGCAAAGCTACCTTTTTTCACTTCCTGTACATTTACCCTGTCTGTCCATAGTG	TAGCGCACAGACAGATAAAAATTACAGAGTACACAACATCCATGAA	7	-26.3	Yes	Yes	No	No
	arrS	guaC	AATCCGATTTAAATATCGAGTCTCCTTGTTTCGACTTAAGCTGGCAATTGGATTGCCAGCTTTCTTTT	CGAAGAGAGCGGCGGTCGCATCGTTGAGGAGAACGGCGAGAAATTTATGCTGTTCTACGGC	1	-37	No	Yes	No	No
	chiX	rsmG	AAAGTGACGGCATAATAATAAAAAAATGAAATTCCTCTTTGACGGGCCAATAGCGATATTGGCCATTTTTTTA	CAGGTTTTCTACTGATATAACTGGTTACATTTAACGCCACGTTCACTCTTTTGCATCAACAAGATA	1	-12.3	No	No	Yes	No
	arrS	fklB	GTAATCCGATTTAAATATCGAGTCTCCTTGTTTCGACTTAAGCTGGCAATTGGATTGCCAGCTTTCTTTT	GACTGACTAAAGGCCGTAGAGCCTGAACAACACAGACAGGTACAGGAAGAA	1	-19.8	No	Yes	No	No
	chiX	ygaM	AAGTGACGGCATAATAATAAAAAAATGAAATTCCTCTTTGACGGGCCAATAGCGATATTGGCCA	CGCGTCTTTGACCCCGAAGCCTGTCTTCGGGGTTTCTTTT	1	-22.8	No	No	No	Yes
	omrB	gcvH	AGAGGTATTGATAGGTGAAGTC	CTTCTGCGGGAGAGGATCAGGGTGAGGAAAATTTATGCCTCACCCTCACTCTCTT	1	-12.7	No	No	Yes	No
	gadY	macB	TGTTTATAAAAAAATGGCTGATCTTATTTCCAGTAAAAGTTATATTTAACTTACT	GCTCTTGTCAGCGGCAGGGCGTTCTGCCGATAACCGTAA	1	-8.9	No	No	Yes	No
	omrB	cpxP	CCCAGAGGTATTGATAGGTGAAGT	CCATCCCTGTCTTCCCCCA	1	-10.9	No	No	No	Yes
	chiX	miaA	AAGTGACGGCATAATAATAAAAAAATGAAATTCCTCTTTGACGGGCCAA	AGACGTATCGTGCGCAATTTTTTCAGAATCGAAAGGTTCAAAGTACAAA	1	-8.1	No	No	Yes	No
	omrB	mutH	CATGAATTACACCAGCCTGCGC	TCATTTTTTTGGCAGGGCTTTTTA	1	-10.2	No	Yes	No	No
	spf	gadE	ATCGGATTTGGCTGAATATTTTAGCCGCCCCAGTCA	ATTGATGGCTGGCATGACGAGGGATGCAGATGCTGATTTCATTACCCCCGGTGATTACTAAA	1	-19.2	No	No	Yes	No
	ryeA	gltI	ACAGATAAAAAGAGACCGAACACGATTCC	GGCGGAAATTCCAGCCCTCTCGATTGTTACGTAGCACG	1	-7.9	No	No	No	Yes
	ryjB	ybiJ	GAAGGCGGCAGGGATCGCAGAAGGGTTATTGCTCTTTGCCGGGGATAAGCGCTCTGCTTATCCCCATCT	ATGCTCTAACCCTCATTGATCCTATGTTACCCTTGTTTGCCCGTCCGC	4	-30.7	No	No	No	Yes
	ryeA	cpxP	GTGTTATGGTTGACTATAAAGTCAGCGAAGGAAATGCTTCTGGCTTTTAACAGATAAAAAGAGACCGAACAC	TTTTCCTTGCCATAGACACCATCCCTGTCTTCCCCCACATG	1	-16.8	No	Yes	No	No
	dsrA	gcvH	TGTAACGAATTTTTTAAGTGCTTCTTGCTTAAGCAAGTTTCATCCCGACCCC	CTTTATTCCTCTTCTGCGGGAGAGGATCAGGGTGAGGAAAATTTATGCCTCACCCTCACTCT	2	-19.3	No	No	Yes	No
	ryeA	cpxP	GGCTCTTGGGAGAGAGCCGTGCGCTAAAAGTTGGCATTAATGCAGGCTTAGTTGCCTTGCC	ATCCCTGTCTTCCCCCACATG	1	-10.8	No	No	No	Yes
	gadY	sucD	TGTTATAACGGTTTATTAGTCTGGAGACGGCAGACTATCCTCTTCCCGGTCCCCTATGCCGGGTTTTTTTTA	TCTGTAATAAGAAATAGCCCTCGCCGCTTCC	1	-17.4	No	No	No	Yes
	gcvB	yfeA	TCCTGAGCCGGAACGAAAAGTTT	TTAGTTCTTCTTTTCGGATCCGGCACTTCTG	2	-20.6	No	Yes	No	No
	arrS	gcvH	GTAATCCGATTTAAATATCGAGTCTCCTTGTTTCGACTTAAGCTGGCAATTGGATTGCCAGCTTTCTTTTA	TTTATTCCTCTTCTGCGGGAGAGGATCAGGGTGAGGAAAATTTATGCCTCACCCTCACTCTCT	3	-17.9	Yes	No	Yes	No
	spf	pgsA	TTCAGACCTTTTACTTCACGTAATCGGATTTGGCTGAATATTTTAGCCGCCCCAGTCAG	ATCGAACGGCGGCACTGATTGCCAGACGATAATAAAATCAAGTGATTAACTGATTGCTTGATG	1	-26.5	No	Yes	No	No
	omrA	fimA	GATTATTCGGTACGCTCTTCGTACCCTGTCTCTTGCACCAACCTGCGCGGATGCGCAGGTTTTTTT	TCAGGGACGTCATTACGGGCAGGGATGCCCACCCT	1	-22	No	No	Yes	No
	gcvB	ftsP	CTTCCTGAGCCGGAACGA	CTCTTTCGTTCCGGCTTATAATCCCCGGCCTTTGATTATTTTTTTA	3	-23	No	No	No	Yes
	dsrA	malM	CAAGTTTCATCCCGACCCCC	GCTGATTTTGCAACAACTGGTGCGTCTCCTGGCGCACCTTTTTTT	1	-5.9	No	No	No	Yes
	arrS	thrL	GTAATCCGATTTAAATATCGAGTCTCCTTGTTTCGACTTAAGCTGGCAATTGGATTGCCAGCTTTCTT	CAGACAGATAAAAATTACAGAGTACACAACATCCATGAAACGCATTAGCACCACCATTACCACCACCATCACCATTACCACAGGTAACGGTGCGGGCTGACGCGTACAGGAAA	4	-23	No	Yes	No	Yes
	chiX	cpxP	AAGTGACGGCATAATAATAAAAAAATGAAATTCCTCTTTGACGGGCCAATAGCGATATTGGCCAT	ACCATCCCTGTCTTCCCCCACATGC	1	-9.6	No	No	No	Yes
	dsrA	cpxP	AACGAATTTTTTAAGTGCTTCTTGCTTAAGCAAGTTTCATCCCGACCC	ATCCCTGTCTTCCCCCACATG	1	-2.7	No	No	No	Yes
	omrB	gadE	ATTGATAGGTGAAGTCAACTTCGGGTTGAGC	TGTATCCACCAGTAGAACCCTTCGTTGCCCGAATGCTGGCAGGAACTGTTGGCAGAACGGCAACATTTTT	1	-19.3	No	No	No	Yes
	gcvB	msrC	GTTTTATCGGAATGCGTGTTC	ACGGATAACGTAGCATTTACTGATAGCGTCATTATAATGACGCCTGT	1	-11.8	No	No	Yes	No
	gcvB	yceM	CTTCCTGAGCCGGAACGAAAAGTTTTATCGGAATGCGTGTTCTGGTGAACTTTTGGCTTACGGTTGTGA	TTCAGCGCCTGCCTTGCAGGCGTTTTGCCCGTGGGTCTGGATTAGAACACCG	1	-27.1	No	No	Yes	No
	sibB	gcvH	AGGGTAGAGCGGGGTTTCCCCCGCCCTGGTAGTCTTAGTAAGCGGGGAAGCTTATGACTAAG	TTCTGCGGGAGAGGATCAGGGTGAGGAAAATTTATGCCTCACCCTCACTCTC	1	-41.6	No	No	No	Yes
	arrS	yncL	AAATATCGAGTCTCCTTGTTTCGACTTAAGCTGGCAATTGGATTGCCAGCTTTCTTTTA	TAGTGATTTTGCACGCAGCACGTACTGTCAGAGAAATCAGTGCTCTGACAGTACGCAAGA	1	-18.6	No	No	Yes	No
	arrS	ydjM	GTAATCCGATTTAAATATCGAGTCTCCTTGTTTCGACTTAAGCTGGCAATTGGATTGCCAGCTTTCT	TCCATTTGAATATAAGAGCCAGCTCACAGTTCTGTTAATCTTGCGCCAACACTATGACTG	1	-18.9	No	No	Yes	No
	spf	cpxP	ATATTTTAGCCGCCCCAGTCAGTAATG	TTCCTTGCCATAGACACCATCCCTGTCTTCCCCCACATGCTGTGGGGGTTTTTTTTATCCTCAATTTGCCTGCTGCTTAATGCATTGCAGATGATTTGCTTC	2	-15.2	No	Yes	Yes	No
	spf	gcvH	CTTTCAGACCTTTTACTTCAC	CTTTATTCCTCTTCTGCGGGAGAGGATCAGGGTGAGGAAAATTTATGCCTCACCCTCACTCTCT	1	-11.8	Yes	No	No	Yes
	gcvB	sucD	ACCCTGTCTGTCCATAGTGATTAATGTAGCACCGCCTAATTGCGGTGCTTTTTTTT	GTTGGCCATCGTATGATGGCCTTTTTTGTG	1	-14.5	No	No	No	Yes
	ryeA	nuoB	TGTATTCGGTCCAGGGAAATGGCTCTTGGG	GGATTTTTCTTCGCTTATTCCTAAATCTATTTCGCGAAGCTTACTGCGCCGACAGTCACCA	1	-17	No	No	Yes	No
	chiX	malG	AAAGTGACGGCATAATAATAAAAAAATGAAATTCCTCTTTGACGGGCCAATAGCGATATTGGC	TGTGACTGTTATTCGGCGCTCCACGGAGCGCCTTTTTTTC	1	-18.7	No	No	Yes	No
	arrS	glnA	GATTTAAATATCGAGTCTCCTTGTTTCGACTTAAGCTGGCAATT	GAAACTTTTCGCCTGTCTCTGGCAGGCCTGGGATCGGTGGCAAGCACATCA	1	-18.3	No	No	No	Yes
	arrS	yfeX	GTAATCCGATTTAAATATCGAGTCTCCTTGTTTCGACTTAAGCTGGCAATTGGATTGCCAGCTTTCTTTT	TTCATTGATTAAAGGCCAGGCAGTAACATTACTGACTGGCCTCAGATTG	1	-18.3	No	No	Yes	No
	glmZ	cpxP	CATGGACACAACGTTGAGTGAAGCACCCACTTGTTGTCATACAGACCTGTTTTAACGCCTGCTCC	TCCCTGTCTTCCCCCACATG	1	-4.9	No	No	No	Yes
	arrS	chbB	GTAATCCGATTTAAATATCGAGTCTCCTTGTTTCGACTTAAGCTGGCAATTGGATTGCCAGCTTTCTTTTA	TTTTCCCGTCAAAGAGTTATTTCATAAATCAATACCGCAATATTTAAATTGCGGTTTT	1	-16.4	No	No	Yes	No
	ryeA	exuR	AAGTCAGCGAAGGAAATGCTTCTGGCTTTTAACAGATAAAAAGAGACCGAACACGATTCC	TTGCGGTAGTGCATCTTTTAAAACCAGCGTGGCGTTAACC	1	-21.5	No	No	No	Yes
	spf	gmhB	AGTCGCGTAGGGTACAGAGGTAAGATGTTCTATCTTTCAGACCTTTTACTTCAC	CTTCACACAAACAGCCGGTTCGGTTGAAGAGAAAAATCCTGAAATTCAGGGTTGACTCTGAAA	1	-17.1	No	No	No	Yes
	omrA	clpB	TATTCGGTACGCTCTTCGTACCCTGTCTCTTGCACCAACCTGCGCGGATGCGCAGGTTTTTTT	TTTTGCCTGAAAAGTGAGCGAACGATAAAGTTTTTATATTTTTCGCTTG	1	-13.3	No	No	Yes	No
	gcvB	sucD	AAAAGTTTTATCGGAATGCGTGTTCTGGTGAACTTTTGGCTTACGGTTGTGATGTTGTGTTGTTGTGTTTGCAA	AATAAGAAATAGCCCTCGCCGCTTCCCT	1	-14.9	No	No	No	Yes
	chiX	wzzB	AAGTGACGGCATAATAATAAAAAAATGAAATTCCTCTTTGACGGGCCAATAGCGATATTGGCCATTTTTT	TTTCGGTTTTAAAGAAAAAGGGCAGGGTGGTGACACCTTGCCCGTTTTTT	1	-22.4	No	No	Yes	No
	ryeA	kgtP	ACAGATAAAAAGAGACCGAACACG	TAGCGAACAGACAAAAAG	1	-1.1	No	No	Yes	No
	ryeA	miaA	AAGTCAGCGAAGGAAATGCTTCTGGCTTTTAACAGATAAAAAGAGACCGAACACGATTCCTG	GAGACGTATCGTGCGCAATTTTTTCAGAATCGAAAGGTTCAAAGTACAAATAAGCATATAAGGAAAA	1	-18.4	No	No	No	Yes
	omrA	malM	GAGGTATTGATTGGTGAGATTATTCGGTACGCTCTTCGTACCCTGTCTCTTGCACCAACCTGCGCG	CAGTGCTGATTTTGCAACAACTGGTGCGTCTCCTGGCGCACCTTTTTTT	1	-27	No	No	Yes	No
	gcvB	ftsA	GTTGTTGTGTTTGCAATTGGTCTGCGATTCAGACCATGGTAGCAAAGC	ATGATTACGGCCTCAGGCGACAGGCA	1	-12.5	No	No	Yes	No
	arcZ	fldA	TTTCCCTGGTGTTGGCGCAGTATTCGCGCACCCCGGTCTAGC	GTTGTAAATGTAAGCTGTGCCACGTTTTTATTAACAATATTTGCCAGGGACTTGTGGTT	37	-27.3	No	Yes	Yes	Yes
	gcvB	gltI	ATCGGAATGCGTGTTCTGGTGAACTTTTGGCTTACGGTTGTGATGTTGTGTTGTTGTGTTTGCAATTGGTCTGCGATTCAGACCATGGTAGCAAA	TAATTACAAGAACCAGGGGCGGAAATTCCAGCCCTCTCGATTGTTACGTAGCACG	4	-29.3	Yes	Yes	Yes	Yes
	ffs	cpxP	GGGATGTAGCTGGCAGGG	AACCCTGTTTTCCTTGCCATAGACACCATCCCTGTCTTCCCCCACATGCTGTGGGGGTTTTTTTT	24	-21.5	No	Yes	Yes	Yes
	cyaR	yqaA	CCTCCTTAGCCTGTGTAATCT	TTGACAGGCGGGAGGTCAA	1	-20.2	No	No	No	Yes
	chiX	gadE	AAGTGACGGCATAATAATAAAAAAATGAAATTCCTCTTTGACGGGCCAATAGCGATATTGGCCATTTTTTTA	CCAGTAGAACCCTTCGTTGCCCGAATGCTGGCAGGAACTGTTGGCAGAACGGCAACATTTTTT	2	-22.3	No	No	No	Yes
	arrS	cpxP	GTAATCCGATTTAAATATCGAGTCTCCTTGTTTCGACTTAAGCTGGCAATTGGATTGCCAGCTTTCTTTT	TTTCCTTGCCATAGACACCATCCCTGTCTTCCCCCACATGC	3	-11	No	No	No	Yes
	arrS	tldD	GTAATCCGATTTAAATATCGAGTCTCCTTGTTTCGACTTAAGCTGGCAATTGGATTGCCAGCTTTCTTT	CGAACGGTCCCCTCGCCCCTTTGGGGTGAGGGTTAGGGTGAGGGGAACCCGTTGG	1	-26.4	No	No	Yes	No
	sdsR	ydiU	TTTTAGCGCACGGCTCTCTCCCAAGAGCCATTTCCCTGGACCGAATACAGGAATCGTGTTCGGTC	AGTGTCTGGCTGGAAATTCGCCGAATAGGCTGCGGGGAAGCGGTCTTGTGATTGGCATCCGTT	1	-38.2	No	No	Yes	No
	arrS	sucD	GTAATCCGATTTAAATATCGAGTCTCCTTGTTTCGACTTAAGCTGGCAATTGGATTGCCAGCTTTCTTTTA	ATCTGTAATAAGAAATAGCCCTCGCCGCTTCCCTCTACAGGAATGGCGAAGGGCTGTCGGTTTCG	4	-24.7	No	Yes	Yes	Yes
	gcvB	yqaA	ATTTACCCTGTCTGTCCATAGTGATTAATGTAGCACCGCCTAATTGCGGTGCTTTTTTTT	ATTTTGACAGGCGGGAGGTC	1	-17.8	No	No	Yes	No
	sokX	gcvH	GGTTCGAACGCTGGCCTCAGGTTGATAGAAATATCGCCTGGGGCTTTTGTCC	GCTTTATTCCTCTTCTGCGGGAGAGGATCAGGGTGAGGAAAATTTATGCCTCACCCTCACTCTCT	1	-23.2	No	No	Yes	No
	chiX	tusB	AAGTGACGGCATAATAATAAAAAAATGAAATTCCTCTTTGACGGGCCAATAGCGATATTGGCCATTTTTT	ATCGCCCTAAAATTCGGCGTCCTCATATTGTGTGAGGACGTTTTATTAC	2	-20.4	No	Yes	No	Yes
	gcvB	tusB	GGTAGCAAAGCTACCTTTTTTCACTTCCTGTACATTTACCCTGTCTGTCCATAGTGATTAATGTAGCACCGCCT	TATTTCTTGACACCTTTTCGGCATCGCCCTAAAATTCGGCGTCCTCATATTGTGTGAGGACGT	1	-16.3	No	No	No	Yes
	gadY	ydjM	GTTTATTAGTCTGGAGACGGCAGACTATCCTCTTCCCGGTCCCC	CATTTGAATATAAGAGCCAGCTCACAGTTCTGTTAATCTTGCGCCAACACTATGAC	1	-15	No	No	Yes	No
	arrS	sucD	GTAATCCGATTTAAATATCGAGTCTCCTTGTTTCGACTTAAGCTGGCAATTGGATTGCCAGCTTTCTTTTA	GAATGGCGAAGGGCTGTCGGTTTCGACATGGTTGGCCATCGTATGATGGCCTTTTTT	1	-25.2	No	Yes	No	Yes
	spf	yciM	TAGGGTACAGAGGTAAGATGTTCTATCTTTCAGACCTTTTACTTCAC	CTGTTAATTTTTTATTTC	1	-5.8	No	No	Yes	No
	arrS	ytfQ	GTAATCCGATTTAAATATCGAGTCTCCTTGTTTCGACTTAAGCTGGCAATTGGATTGCCAGCTTTCTT	CTTTACACCGGGGGAAACC	1	-8.7	No	No	No	Yes
	sroH	malG	AATGGCGTTCTGAATACCAGAGATAATTCTCTGGCGAAACCCACCTTAAGGTGGGTTTTGTTA	GTGACTGTTATTCGGCGCTCCACGGAGCGCCTTTTTTTCT	1	-19.6	No	No	Yes	No
	chiX	sucD	AAGTGACGGCATAATAATAAAAAAATGAAATTCCTCTTTGACGGGCCAATAGCGATATTGGCCATTTTTTTA	CTGTAATAAGAAATAGCCCTCGCCGCTTCCCTCT	2	-16.1	No	No	Yes	Yes
	sroH	gcvH	GTTCTGAATACCAGAGATAATTCTCTGGCGAAACCCACCTTAAGGTGGGTTTTGTTA	TTTATTCCTCTTCTGCGGGAGAGGATCAGGGTGAGGAAAATTTATGCCTCACCCTCACTCTC	1	-20	No	No	Yes	No
	gadY	insG	GAGTGTTATAACGGTTTATTAGTCTGGAGACGGCAGACTATCCTCTTCCCGGTCCCCTATGCCGGGTTTTTTTT	TTGACTGTTTGACATTGTCATGCCCGCAGGCCAGCGG	1	-20	No	No	No	Yes
	chiX	glnA	AAAGTGACGGCATAATAATAAAAAAATGAAATTCCTCTTTGACGGGCCAATAGCGATATTGGCCATTTTTTTA	TTTTAGTTGCCGTGGAAACTTTTCGCCTGTCTCTGGCAGGCCTG	2	-21	No	Yes	Yes	No
	ryeA	wzzB	AAAGTCAGCGAAGGAAATGCTTCTGGCTTTTAACAGATAAAAAGAGACCGAACACGA	AATCTTTTCGGTTTTAAAGAAAAAGGGCAGGGTGGTGACACCTTGCCCGTTTTT	2	-22.3	No	No	Yes	No
	gcvB	asd	CTTCCTGTACATTTACCCTGTCTGTCCATA	AATTGGATGGGGTGACACAATAAAACAGGAAGAC	2	-24	Yes	No	Yes	No
	arrS	nuoL	AAATATCGAGTCTCCTTGTTTCGACTTAAGCTGGCAATTGGATTGCCAGCTTTCTT	ATCCGGTCCTGACGGGACTTTTACA	1	-13.1	No	No	Yes	No
	cyaR	mlaA	CTGAAAAACATAACCCATAAAATGCTAG	AAGAAACAAATAAAAAAGGTGAGTCGCAAAACTC	1	-3.1	Yes	No	Yes	No
	ohsC	malG	CTGTTGTTGAGGGTGCATGCTGCACAA	TGTTGTTCTGCCAATGTTATGCCGCTGCACCCTCAACTTACGTTATCCCAACTTGTGACTGTTATTCGGCGCTCCACGGAGCGCCTTTTTT	91	-30.5	No	Yes	Yes	Yes
	dsrA	yhfA	AGGGTCGGGATTTTTTTAT	TTTCTTTCCTTCCATCAATCGTTGCACCAGC	2	-6.7	No	Yes	No	No
	gcvB	cpxP	ACTTCCTGAGCCGGAACGAAAAGTTTTATCGGAATGCGTGTTCTGGTGAACTTTTGGCTTAC	TTTTCCTTGCCATAGACACCATCCCTGTCTTCCCCCACATGC	1	-17.7	No	No	Yes	Yes
	arrS	fimA	AATATCGAGTCTCCTTGTTTCGACTTAAGCTGGCAATTGGATTGCCAGCTTTCTTTT	TTCAGGGACGTCATTACGGGCAGGGATGCCCACCCT	1	-15.1	No	No	Yes	No
	arcZ	ydjM	TTTCCCTGGTGTTGGCGCAGTATTCGCGCACCCCGGTCTA	TCTTGCGCCAACACTATGA	1	-24.3	No	Yes	No	No
	arrS	insH1_2	CCGATTTAAATATCGAGTCTCCTTGTTTCGACTTAAGCTGGCAATTGGATTGCCAGCTTTCTTTT	AAACCTTCTGTTATATATTACCCTTTATTTTTGGGGGCGTCTCAACGCCCCATTTTTAA	2	-12.4	No	Yes	No	Yes
	spf	cpxP	GTAGGGTACAGAGGTAAGATGTTCTATCTTTCAGACCTTTTACTTCACGTAATCGGATTTGGCTGAAT	TTTTCCTTGCCATAGACACCATCCCTGTCTTCCCCCACATGC	3	-14.4	No	Yes	Yes	Yes
	cyaR	ftsA	CGCTGAAAAACATAACCCATAAAATGCTAGCTGTACCAGGAAC	TTTTTATGAGGCCGACGATGATTACGGCCTCAGGCGACAG	1	-9.8	Yes	No	Yes	No
	spf	gltI	TATTTTAGCCGCCCCAGTCAGTAATGACTG	ATTACAAGAACCAGGGGCGGAAATTCCAGCCCTCTCGATTGTTACGTAGCACG	2	-18.9	No	Yes	Yes	No
	csrB	cpxP	ACACACCAGGATGGTGTTTCAGGGAAAGGCTTCTGGATGAAGCGAAGAGGATGACGCAGGACGCG	TTTCCTTGCCATAGACACCATCCCTGTCTTCCCCCACAT	4	-26.4	No	No	Yes	No
	omrA	cpxP	CCCAGAGGTATTGATTGGTGAGATTATTCGGTAC	TTTCCTTGCCATAGACACCATCCCTGTCTTCCCCCACATGC	1	-13	No	No	No	Yes
	cyaR	gcvH	CTGAAAAACATAACCCATAAAATGC	CTTTATTCCTCTTCTGCGGGAGAGGATCAGGGT	1	-6.5	Yes	No	No	Yes
	gcvB	yeiR	CATTTACCCTGTCTGTCCATAGT	AGTAAGATAATTAGAGA	1	-4.2	No	No	Yes	No
	spf	iraP	GTAGGGTACAGAGGTAAGATGTTCTATCTTTCAGACCTTTTACTTCAC	ACGGCCGAGACTTATAGTCGCTTTGTTTTTATTTTTTAATGTATTTGTACATGGAGAAAA	2	-13.4	No	Yes	No	No
	micA	ygaM	GAAAGACGCGCATTTGTTATCATCAT	CAAAAATGATAATAAATACGCGTCTTTGACCCCGAAGCCTGTCTTCGGGGTTTCTTTTTG	5	-26.5	Yes	No	Yes	No
	rybB	rbsB	TTTCGGTTCAAGGTTGATGGGTTTTTTGT	GATGAACGTGTAATATAAAGAAAAGCAGGGCACGCGCCACCCTAACACGGTGGCGCATTTT	1	-13.7	No	No	Yes	Yes
	sokC	cutC	TTCAGCATATAGGAGGCCTCGGGTTGATGGTAA	AATTTCAACAGGGGCCTTTTTT	2	-20.8	No	No	Yes	No
	omrA	gltI	GTATTGATTGGTGAGATTATTCGGTACGC	GATTGTTACGTAGCACGG	1	-5.8	No	Yes	No	No
	gcvB	wzzB	GTGTTCTGGTGAACTTTTGGCTTACGGTTGTGATGTTGT	TTCGGTTTTAAAGAAAAAGGGCAGGGTGGTGACACCTTGCCCGTTTTT	1	-12.1	No	Yes	No	No
	arcZ	trmA	TTTCCCTGGTGTTGGCGCAGTA	ATAACGTTGATGCAGGCAGTAAACCGTCAGCACCAGGGAAATA	4	-30.9	No	Yes	No	No
	rybB	rbsB	CATCAGTCTTAATTAGTGCCACTGCTTTTCTTTGATGTCCCCATTTTGTGGAGCCCATCAACCCCGCCATTTCGGTTCAAGGTTGATGGGTTTTTTGT	AGATGAACGTGTAATATAAAGAAAAGCAGGGCACGCGCCACCCTAACACGGTGGCGCATTTTA	25	-30.2	No	Yes	Yes	Yes
	gadY	ftsA	TTTCCCGTGCCAACAGGGAGTGTTATAACGGTTTATTAG	ACGATGATTACGGCCTCAGGCGA	1	-11.6	No	No	No	Yes
	arrS	gadE	AATATCGAGTCTCCTTGTTTCGACTTAAGCTGGCAATTGGATTGCCAGCTTTCTTTT	TTCCCCTGGTATGTGTATCCACCAGTAGAACCCTTCGTTGCCCGAATG	2	-18.6	No	No	Yes	No
	mgrR	yihA	GATTCGTTATCAGTGCAGGAAAATGCCTGTTAGCGTAAAAG	ATTACGGATCTTTTCTTTCGCCCAATAAAAAACG	1	-10.4	No	No	Yes	No
	omrA	clpB	CCCAGAGGTATTGATTGGTGAG	GACTCTGTAGCGGGAAGGCGTATTATGCACACCCCGCGCCGCTGAGA	1	-11.6	No	No	Yes	No
	dsrA	gltI	ACATCAGATTTCCTGGTGTA	TACAAGAACCAGGGGCGGAAATTCCAGCCCTCTCGATTGTTACGTAGCAC	1	-11.7	No	No	Yes	No
	cyaR	exuR	AAAAACATAACCCATAAAATGC	AAACCAGCGTGGCGTTAACCGA	1	-7.2	No	No	Yes	No
	gcvB	cpxP	CTTCCTGAGCCGGAACGAAAAGTTTTATCGGAATGCGTGTTCTGGTGAACTTTTGGCTTACGGTTGTGATGTTGTGTTGTTGTGTTTGCAATTGGTCTGCGATTCAGACCATGGTAGCAAAGCTACCTTTTTTCACTTCCTG	TTTTCCTTGCCATAGACACCATCCCTGTCTTCCCCCACATGCTG	3	-21.6	No	Yes	Yes	Yes
	chiX	insH1_2	AAAATGAAATTCCTCTTTGACGGGCCAATAGCGATATTGGCCATTTTTTTA	CAAGCCACTTCCTTTAGAAGCACAACCTTGCTTCTAA	1	-8.7	No	No	Yes	No
	mgrR	dxr	GTTATCAGTGCAGGAAAATGCCTGTTAGCGT	AGTCTGCGCCATCTGATCGT	1	-10.7	No	Yes	No	No
	cyaR	borD	GCTGAAAAACATAACCCATAAAATGCT	CGGAGGCCGTGGTGGCTTCACGCACTGACTGACAGACTGCTT	1	-8.4	No	No	Yes	No
	gcvB	mtfA	TACATTTACCCTGTCTGTCCATAGTGATTAATGTAGCACCGCCTA	AGTGTTGACAGACAAGGTAC	10	-19.7	No	Yes	Yes	No
	ryeA	sucD	AGCGAAGGAAATGCTTCTGGCTTTTAACAGATAAAAAGAGACCGAACACGA	GCGAAGGGCTGTCGGTTTCGACATGGTTGGCCATCGT	1	-19.1	No	No	Yes	No
	dsrA	fldA	TAAGCAAGTTTCATCCCGACCC	AACTTTTGCTGTTGTACCTGTACAATGTCCCGGTGTTCAAGTGG	1	-5.7	No	Yes	No	No
	glmZ	glnA	GAATGACGCAGAGCCGTTTACGGTG	GTTGCCGTGGAAACTTTTCGCCTGTCTCTGGCAGGCCTGGG	1	-15.6	No	No	No	Yes
	ryeA	cpxP	AGCGTGGTGGTCATCAGCTGAAATGTTAAAAACCGCCCGTTCTGGTGA	TTTTCCTTGCCATAGACACCATCCCTGTCTTCCCCCACAT	1	-15	No	No	No	Yes
	spf	yifK	GTAGGGTACAGAGGTAAGATGTTCTATCTTTCAGACCTTTTACTTCACGTAAT	CGCACAAACCGTAACCAAACGCGCAATTTATTTAAAAAGGGACTAGACAGAGGGGTGGGAAGT	1	-15.7	No	Yes	No	No
	csrB	cpxP	TCGGTGGGTCAGGAAGGCCAGGGACACTTCAGGATGAAGTATCACATCGGGGTGGTGTGAGCAGGAAGC	TTTTCCTTGCCATAGACACCATCCCTGTCTTCCCCCACATGCTGTGGGGGTTTTTTTTATC	41	-40.9	No	No	Yes	Yes
	cyaR	cpxP	GCTGAAAAACATAACCCATAAAATGCTAGCTGTAC	GTTTTCCTTGCCATAGACACCATCCCTGTCTTCCCCCACATGC	7	-4	No	No	Yes	Yes
	mgrR	gltI	CGATTCGTTATCAGTGCAGGAAAATGCC	AAGAACCAGGGGCGGAAATTCCAGCCCTCTCGATTGTTACGTAGCACG	2	-12.4	No	No	Yes	No
	cyaR	ydbJ	CTGAAAAACATAACCCATAAAATGCTA	CTAATGGTGTTATCGAGTTCATTAAGCTGCGGGTTAGCG	1	-10.7	No	No	Yes	No
	glmZ	pmbA	TGCCTCATCAGACACCATGGACACAACGTTGAGTGAAGCACCCACTTGTTGTCATACAGACCT	AGTCGTCGATGAGGCAGTGTGAAGGATG	1	-20	No	No	Yes	No
	gcvB	birA	ACATTTACCCTGTCTGTCCATAGTGATTAATGTAGCACCGCCT	TGTTGAATGGGTTAATGGGCAGGAGGGT	2	-24.7	No	No	Yes	No
	gadY	gmk	GCCAACAGGGAGTGTTATAACGGTTTATTAGTCTGGAGACGG	GATTTCAGTATCATGCCCAGTCATTTCTTCACCTGTGGA	1	-17.3	No	No	Yes	No
	glmZ	cutC	CTTAGTGCCTCATAAACTCCGGAATGACGCAGAGCCGTTTACGGTG	TTTTTACCGTTGCATCATGTCGCC	1	-13.5	No	No	Yes	No
	csrB	rbsB	ATCGGGGTGGTGTGAGCA	AGATGAACGTGTAATATAAAGAAAAGCAGGGCACGCGCCACCCT	1	-23.7	No	No	Yes	No
	cyaR	gltI	CTCCTTAGCCTGTGTAATCTCCC	GGCGGAAATTCCAGCCCTCTCGATTGTTACGTAGCACG	1	-6.8	No	No	No	Yes
	ryhB	ydcI	GCGATCAGGAAGACCCTCGCGGAGAACCTGAAAGCACGACATTGCTCACATTGCTTCCAG	GTTCACCCGCTCCGCGAGGTTC	1	-24.6	No	No	No	Yes
	glmZ	cpxP	TAGTGCCTCATAAACTCCGGAATGACGCAGAGCCGT	TTTTCCTTGCCATAGACACCATCCCTGTCTTCCCCCACAT	1	-8.4	No	No	Yes	No
	gadY	cpxP	AACAGGGAGTGTTATAACGGTTTATTAGTCTGGAGACGGCAGACTATCCTCTTCCCGGTCCCCTATGCCGGGTTTTTTTT	TTTCCTTGCCATAGACACCATCCCTGTCTTCCCCCACATGC	1	-20	No	No	Yes	No
	spf	clpB	GGGTACAGAGGTAAGATGTTCTATCTTTCAGACCTTTTACTTCAC	AACGATAAAGTTTTTATATT	1	-5	No	No	Yes	No
	cyaR	lnt	CTGAAAAACATAACCCATAAAATGCTAG	AAAAACAAACAATAAAACAG	1	-1.2	No	No	No	Yes
	ryeA	insH1_2	TTCGGTCCAGGGAAATGGCTCTTGGG	TATATTACCCTTTATTTTTGGGGGCGTCTCAACGCCCCATTTTTAA	1	-13	No	Yes	No	No
	mgrR	dxr	GTTATCAGTGCAGGAAAATGCCTGTTA	GTTGGCTTTATAAGGTCAGATATGCCGTGGTT	1	-10.8	No	No	Yes	No
	arrS	gltI	GTCTCCTTGTTTCGACTTAAGCTGGCAATTGGATTGCCAGCTTTCT	ATTACAAGAACCAGGGGCGGAAATTCCAGCCCTCTCGATTG	1	-19.4	No	No	Yes	No
	arrS	kgtP	ATTTAAATATCGAGTCTCCTTGTTTCGACTTAAGCTGGCAATTGGATTGCCAGCTTTCTTTT	AAACTGACAGAGAACATCAATCCAAACATGGCACTGCGATCCCGGCTCATCCCCTGATG	1	-20.8	Yes	No	Yes	No
	spf	yceA	CGTAGGGTACAGAGGTAAGATGTTCTATCTTTCAGACCTTTTACTTCAC	TTTTTTCATTTTTTATA	1	-2.6	No	Yes	No	No
	gcvB	gcvH	TTTACCCTGTCTGTCCATAGTGATTAATGTAGCACCGCCTAATTGCGGTGCTTTTTTTT	TAACGGCTTTATTCCTCTTCTGCGGGAGAGGATCAGGGTGAGGAAAATTTATGCCTCACCCTCAC	1	-26.9	No	No	Yes	No
	gadY	lsrR	GACTATCCTCTTCCCGGTCC	ATTACCGGGAATGATGGAGAACGT	1	-18.7	No	No	No	Yes
	gcvB	cpxP	GCTTTTTTTTACCTTGCGAT	TTTCCTTGCCATAGACACC	1	-3.1	No	No	Yes	No
	gcvB	cpxP	ACTTCCTGAGCCGGAACGAAAAGTTTTATCGGAATGCGTGTTCTGGTGAACTTTTGGCTTAC	TTTTCCTTGCCATAGACACCATCCCTGTCTTCCCCCACATGC	4	-17.7	No	No	Yes	Yes
	arrS	hemN	TCCGATTTAAATATCGAGTCTCCTTGTTTCGACTTAAGCTGGCAATTGGATTGCCAGCTTTCTT	GATGCGCTGGGCAACAAAACCTGTTGAAATTATTGCTTTT	1	-17.2	No	No	Yes	No
	cyaR	yghB	CTGAAAAACATAACCCATAAAATGCT	TGGTGACAGACTTAAAA	1	-2.8	No	No	Yes	No
	spf	pdhR	GTACAGAGGTAAGATGTTCTATCTTTCAGACCTTTTACTT	AAAAATTATCCAGAAGATGTTGTAAATCAAGC	1	-6.3	No	No	Yes	No
	spf	bhsA	CCTTTTACTTCACGTAATCGGATTTGGCTGAATATTTTAGCCGCCCCAGTCAGT	CTGCTGATTTTTTCCCCGCGACATGCCGTGTCGCGGGGATTTTTTTA	1	-18.2	No	Yes	No	No
	sdsR	msrC	ATTAATGCCAACTTTTAGCGCACGGCTCTC	CTGTTCATGCCTGCGCTTGTTGGCTACGTCCG	1	-24.1	No	No	No	Yes
	chiX	gadE	AAGTGACGGCATAATAATAAAAAAATGAAATTCCTCTTTGACGGGCCAATAGCGATATTGGCCATTTTTTT	CATAAGCAACTGAAATTGATGGCTGGCATGACGAGGGATGCAGATGCTGATTTCA	2	-25.2	No	No	No	Yes
	gcvB	gcvH	CTTCCTGAGCCGGAACGAAAAGT	CCTCACCCTCACTCTCTT	1	-4.4	No	No	No	Yes
	spf	sucD	AAGATGTTCTATCTTTCAGACCTTTTACTTCACGTAATCGGATTTGGCTGAATATTTTAGCCGCCCCAGTCAGT	ATGGTTGGCCATCGTATGATGGCCTTTTTT	1	-14.9	No	Yes	No	No
	dsrA	gltI	TTCTTGCTTAAGCAAGTT	AAGAACCAGGGGCGGAAATTCCAGCCCTCTCGATTGTT	1	-5.8	No	No	Yes	No
	arcZ	waaU	TCCCTGGTGTTGGCGCAGTA	AATTTCGTACATTGCCAGTCTTGCACCTAGGGAAG	2	-22.5	No	No	Yes	No
	micA	yhcN	GAAAGACGCGCATTTGTTATCATCATCCCTGAATTCAGAGATGAAATTTTGGCCACTCACGAGTGGCCTTTTTC	CGACGATATTGCCCCCGGTTCGGGGGCTTTTTT	1	-15	No	Yes	No	No
	gcvB	gcvH	GATGTTGTGTTGTTGTGTTTGCAATTGGTCTGCGATTCAGACCATGGTAGCAAAGCTACCTTTTTTCA	CTTTATTCCTCTTCTGCGGGAGAGGATCAGGGTGAGGAAAATTTATGCCTCACCCTCACTCTC	1	-17.6	No	Yes	No	No
	dsrA	exuR	AAGTTTCATCCCGACCCCCT	CAAAACAGCAATAACATTGCGGTAGTGCATCTTTTAAAACCAGCGTGGCGTTAACCGATTCACCAGGAATAA	1	-4.6	No	No	No	Yes
	chiX	gcvH	AAGTGACGGCATAATAATAAAAAAATGAAATTCCTCTTTGACGGGCCAATAGCGATATTGGCCATTTTTTTA	CTTTATTCCTCTTCTGCGGGAGAGGATCAGGGTGAGGAAAATTTATGCCTCACCCTCACTCTCT	2	-28.8	No	No	Yes	No
	arrS	exuR	AATCCGATTTAAATATCGAGTCTCCTTGTTTCGACTTAAGCTGGCAATTGGATTGCCAGCTTT	AATTTATGTTTTTGAATGCTTTCTTATCTCACGATTTAACAGGGAATAGTTCAGGC	1	-18.8	No	No	Yes	No
	cyaR	ppa	CTGAAAAACATAACCCATAAAATGC	GTTCTTCTGGCGTAATAACCCTGAACGCCGGGC	1	-5.1	No	No	Yes	No
	omrA	bhsA	TTCGGTACGCTCTTCGTACCCTGTCTCTTGCACCAACCTGCGCGGATGCGCAGGTTTTTTT	ATGCCTGCTACTGCTGATTTTTTCCCCGCGACATGC	1	-17.4	No	No	Yes	No
	arrS	ftsA	GTAATCCGATTTAAATATCGAGTCTCCTTGTTTCGACTTAAGCTGGCAATTGGATTGCCAGCTTTCTTTT	TTTATGAGGCCGACGATGATTACGGCCTCAGGCG	1	-13.7	No	No	No	Yes
	spf	rpsM	CGTAATCGGATTTGGCTGAATATTTTAGCCGCCCCAGTCAGTA	TTTTCTTGCAAAGTTGGGTTGAGCTGGCTAGATTAGCCAGCCAATCTTT	1	-31.1	No	No	No	Yes
	arrS	chiP	TCCGATTTAAATATCGAGTCTCCTTGTTTCGACTTAAGCTGGCAATTGGATTGCCAGCTTTCT	GCGAGACTTTTCTCAACGCTACTTTTTTAATTTTTATTTTTTCGCTGTTCACCTTTGGT	1	-13.1	No	Yes	No	No
	ryeA	fdoG	ACAGATAAAAAGAGACCGAACACG	CACGCAGCAAGCGAATGTAAATGGGACGTGACAATGTCGAAACA	1	-6.1	No	No	No	Yes
	chiX	ypfM	AAGTGACGGCATAATAATAAAAAAATGAAATTCCTCTTTGACGGGCCAATAGCGATATTGGCCATTTTTTTA	AGTATTAGATGCCGTATGAATATCTCGAA	1	-13.3	No	No	Yes	No
	gadY	tnaA	TTCCCGTGCCAACAGGGAGTGTTATAACGGTTTATTAGTCTG	TATATCTGGCGAATTAATCGGTATAGCAGATGTAATAT	1	-15.6	No	No	No	Yes
	gcvB	pphA	CTTCCTGAGCCGGAACGAAAAGTTTTATCGGAATGCGTGTTCTGGTGAACTTTTGGCTTACGGTTGTGATGTTGTGTTGTTGTGTTTGCAATTGGTCTGCGATTCAGACCATGGTAGCAAAGCTACCTTTTTTCAC	CAAGAGCCATTTCCCTGGACCGAATACAGGAATCGTGTTCGGTCTCTTTTTATC	3	-28.6	No	Yes	Yes	Yes
	chiX	yfaA	AAAGTGACGGCATAATAATAAAAAAATGAAATTCCTCTTTGACGGGCCAATAGCGATATTGGCCATTTTTT	ATCTCCCTTGTTTGAATTGAAAAGTCCAGGCTGCAAAGTCTGGGCTTTTGTC	1	-15.2	No	No	Yes	No
	chiX	dcyD	CTCTTTGACGGGCCAATAGCGATATTGGCCATTTTTTT	TTTCACTAGCGCCTTTT	1	-9.1	No	Yes	No	No
	omrB	dppA	CCCAGAGGTATTGATAGGTGAAGTCAACTTCGGGTTG	ATAACGTTGACCCGACCGGGCAAAAAACAAAAAAGGTCAGGCAGCGACAACCCACTGCAAAGGGTTAAAACAACAAACATCACAATTGGAGCAGA	1	-17.4	No	No	Yes	Yes
	gcvB	yifK	TGTTCTGGTGAACTTTTGGCTTACGGTTGTGATGTTGTGTTGTTGTGTTTGCAATTGGTCTGCGATTCAGACCATGGTAGCAAAGCTACCTTTTTTCA	ACACCGGAAAGCATGCAAACACAACACGAGGATT	23	-25.1	Yes	Yes	Yes	No
	chiX	hupB	TAAAGTGACGGCATAATAATAAAAAAATGAAATTCCTCTTTGACGGGCCAATAGCGATATTGGCCATTTTTTTA	CCTTGAAGGATTCAAGTGCGATATAAATTA	1	-7.9	No	No	No	Yes
	micF	cyaA	TTTCTGAATGTCTGTTTACCCCTATTTCAACCGGATGCCTCGCATTCGGTTTTTT	TTTTAGACCATTTTTTCGTCGTGAAACTAAAA	1	-5.6	No	No	No	Yes
	spf	hscC	GTAGGGTACAGAGGTAAGATGTTCTATCTTTCAGACCTTTTACTTCACGTA	TCTGTTTATCTCTTTTTCTT	1	-10.2	No	No	Yes	No
	sgrS	ptsG	GATGAAGCAAGGGGGTG	AGGCTCTCCCCCCTTGCCACGCGTGAGAACGTAAAAAAAGCACCCATACTCAGGAGCACTCTCA	4	-19.7	Yes	No	Yes	No
	gcvB	rpoE	GAAAAGTTTTATCGGAATGCGTGTTCTGGTGAACTTTTGGC	CAGATTCTGTAGACTTATAATGATAGATAATGATCCGTCTACAGCA	1	-10.6	No	Yes	No	No
	omrA	rpoE	ATTATTCGGTACGCTCTTCGTACCCTGTCTCTTGCACCAACCTGCGCGGATGCGCAGGTTTTTTT	AACCCTTTGCTTGCTCAAATTGCAGCTAATGGAGTGGCGTTTCGATAGCGCGTGGAAATTTGGTTTGGGGAGACTTTACCTC	3	-35.2	No	No	Yes	Yes
	sibA	degQ	AGGGTTAGGGAGAGGTTTCCCCCTC	TTCTCTCCCTCCCCGACT	1	-20.2	No	No	Yes	No
	cyaR	yeiG	CTGAAAAACATAACCCATAAAATGCTAGCTGTAC	TACTCACAGCACATTGAATAAACGGTATGATGAAGAAATTGCAAACAACACAACAAGGAGCCACGC	1	-10.8	No	No	Yes	No
	ryeA	tamA	CTTCTGGCTTTTAACAGATAAAAAGAGACCGAACACGATTCCTGTATTCGGTCCAGGGAAATGGCTCTTG	TGAATAGGTCTAAAGTAAAACATAAGAAATATTTGG	1	-8.5	No	No	Yes	No
	arrS	rho	AAATATCGAGTCTCCTTGTTTCGACTTAAGCTGGCAAT	ACATACCTTATTAAGTTTGAATCTTGTAATTTCCAACGCTTCCCGTTTTATCTTAAATGCGAAGTGAACAG	1	-10.1	No	No	No	Yes
	ryeA	csgD	GCTTCTGGCTTTTAACAGATAAAAAGAGACCGAACACGATTCCTGTATTCGGTCCAGGGAAATGGCTCTTGGGAGAGAGCCGTGCGCTAAA	AGTTTTATATTTTACCCATTTAGGGCTGATTTATTACTACACACAGCAGTGCA	2	-19.6	No	No	No	Yes
	glmZ	grpE	TTGAGTGAAGCACCCACTTGTTGTCATACAGACCTGTTTTAACGCCTGCTCCGTAAT	GATTGATGACAATGTGAGTGCTTCCCTT	1	-26.2	No	No	Yes	No
	arrS	rpoE	AATCCGATTTAAATATCGAGTCTCCTTGTTTCGACTTAAGCTGGCAATTGGATTGCCAGCTTTCTTT	ATTTGGTTTGGGGAGACT	1	-14.5	Yes	No	Yes	No
	sibE	fabF	CTTCTTCGGGAGGGGCTTTC	TTGTCCCACTAGAATCATTTTTTCCCTCCCTGGAG	1	-18.9	No	No	Yes	No
	gadY	pphA	AGTGTTATAACGGTTTATTAGTCTGGAGACGGCAGACTATCCTCTTCCCGGTCCCCTATGCCGGGTTTTTTTTA	CAAGAGCCATTTCCCTGGACCGAATACAGGAATCGTGTTCGGTCTCTTTT	1	-31.5	No	No	No	Yes
	arrS	hupB	TTAAATATCGAGTCTCCTTGTTTCGACTTAAGCTGGCAATTGGATTGCCAGCTTTCTTTT	TGCGCGTTCGTACCTTGAAGGATTCAAGTGCGATATAAATTA	2	-14.6	No	No	Yes	Yes
	arrS	glmS	GTAATCCGATTTAAATATCGAGTCTCCTTGTTTCGACTTAAGCTGGCAATTGGATTGCCAGCTTTCTTT	ATTCTGGCCGGCTAACCCGGT	1	-16.2	No	No	Yes	No
	arcZ	nuoC	TTTCCCTGGTGTTGGCGCAGTATTCGCGCACCCCGGTCTA	ATCTATTTCGCGAAGCTTACTGCGCCGACAGTCACCACGG	2	-34.5	No	No	No	Yes
	ryeA	rpoE	GCGAAGGAAATGCTTCTGGCTTTTAACAGATAAAAAGAGACCGAACACGATTCCTGTATTCGGTCCAGGG	ATTCTGTAGACTTATAATGATAGATAATG	1	-7.8	No	Yes	No	Yes
	arrS	tesB	CGATTTAAATATCGAGTCTCCTTGTTTCGACTTAAGCTGGCAATTGGATTGCCAGCTTTCTTTTA	ACTTTGGCTTGCTGCGGCAGCTTTGTTACTGGAGAGTTA	1	-26.9	No	No	No	Yes
	rybB	pphA	TTTTCTTTGATGTCCCCATTTTGTGGAGCCCATCAACCCCGCCATTTCGGTTCAAGGTTGATGGGTTTTTTG	ATTTCCCTGGACCGAATACAGGAATCGTGTTCGGTCTCTTTT	2	-22.9	No	Yes	No	Yes
	gadY	gltJ	AAAGTTATATTTAACTTACTGAGAGCACAAAGTTTCCCGTGCCAA	AATACGCTGGGTAACAATCTTCGAGGGTAGCAGTT	1	-13.5	No	No	Yes	No
	rprA	csgD	ATTGCTGTGTGTAGTCTTTGCCCATCTCCCA	TTTATATTTTACCCATTTAGGGCTGATTTATTACTACACACAGCAGTGC	240	-29.8	Yes	Yes	Yes	Yes
	arrS	csgD	GTAATCCGATTTAAATATCGAGTCTCCTTGTTTCGACTTAAGCTGGCAATTGGATTGCCAGCTTTCTTTTA	ATATTTTACCCATTTAGGGCTGATTTATTACTACACACAGCAGTGC	3	-13	No	No	Yes	Yes
	ryjB	macA	TCCATGCCGATTCGGGTTAATCTG	GTTAATGACCCGGATTGGCATATG	3	-26.5	No	Yes	No	No
	gadY	yeaG	ATAACGGTTTATTAGTCTGGAGACGGCAGACTATCCTCTTCCCGGTCCCCTATGCCGGGTTTTTTT	ACGTTGTTCTCATCGTCGATAAAATGGCATGAGAGTTGCTGTGTTTTAGCAAGAGACGTCGTTCAG	1	-22.9	No	No	No	Yes
	glmZ	pphA	AGACCTGTTTTAACGCCTGCTCCGT	GCCATTTCCCTGGACCGAATACAGGAATCGTGTTCGGTCTCTTTT	1	-11.9	No	No	No	Yes
	gcvB	gdhA	CTTCCTGAGCCGGAACGAAAAGTTTTATCGGAATGCGTGTTCTGGTGAACTTTTGGCTTACGGTTGTGATGTTGTGTTGTTGTGTTTGCAATTGG	CAAAAGCACATGACATAAACAACATAAGCACAATCGTATTAATA	2	-30.8	Yes	No	Yes	No
	arcZ	nuoA	TTACGGCGCAGCCAAGATTTCCCTGGTGTTGGCGCAGTATTCGCGCACCCCGGTCTAGCCGGGGTCATTTTT	CCATGAATCGATGTGGCGTCCATCTGCCGTGAAGAGCAGTGAATCTGGCGCTACTTT	1	-38.4	No	No	Yes	No
	ryeA	yeaG	AGCGAAGGAAATGCTTCTGGCTTTTAACAGATAAAAAGAGACCGAACAC	AGAGTTGCTGTGTTTTAGCAAGAGACGTCGTTCAGTTTACCTCTTCCGGGAGCCTCTACTATTCATATGA	1	-19.2	No	No	No	Yes
	sroH	hupB	ATCCCGCAACCTGCGATTATCGCAAGGTCAAGGCAAAGTCCGGTAATGGCGTTCTGAATACCAGAGA	TTCGTACCTTGAAGGATTCAAGT	1	-10.8	No	Yes	No	No
	chiX	hupB	GACGGCATAATAATAAAAAAATGAAATTCCTCTTTGACGGG	TTAAGGGGTGTTGTAAGGGGATGGCTGGCCTGATATAACT	1	-13.4	No	No	Yes	No
	gcvB	aslB	ATCGGAATGCGTGTTCTGGTGAACTTTTGGCTTACGGTTGTGATGTTGTGTTGTTGTGTTTGCAATTGGTCTGCGATTCAGACCATGGTAGCAAAGCTACCTTTTTTCACTTCCTGTACATTTACCCTGTCTGTCCATAGTGA	TTGAACTAAAAATTCAAAAAGCAGTATTTCGGCGAGTAGCGCAGCTTGGTAGCGCAACTGGTTTGGGACCAGTGGGTCGGAGGTTCGAATCCTCTCTCGCCGACCAATTTTGAACCCCGCTTCGGCGGGGTTTTTTGT	5	-58.8	No	Yes	Yes	Yes
	chiX	yggN	AAGTGACGGCATAATAATAAAAAAATGAAATTCCTCTTTGACGGGCCAATAGCGATATTGGCCATTTTTTTA	ACTTTGTTATCAATCTGGGGCCAGCAAATGCTGGCCTGATTT	1	-23.7	No	No	Yes	No
	arrS	cfa	GATTTAAATATCGAGTCTCCTTGTTTCGACTTAAGCTGGCAATTGGATTGCCAGCTTTCTT	GTCATTTCGGCAAGGGTTCCTCC	1	-13.5	Yes	No	No	Yes
	chiX	yafK	TTCCTCTTTGACGGGCCAATAGCGATATTGGCCATTTTTT	ATTTTGCCGTCCTGGCGTGTGTAACCGTTTTATCAAGGAAT	4	-20.1	No	No	No	Yes
	cyaR	csgD	CTGAAAAACATAACCCATAAAATGCTAGCT	CAGATGTAATCCATTAGTTTTATATTTTACCCATTTAGGGCTGATTTATTACTACACACAGCAGTG	1	-6.3	No	No	Yes	No
	oxyS	gltJ	AACCCTTGAAGTCACTGCCCGTTTCGAGAGTTTCTCAACTCGAATAACTAAAGCCAA	CAATACGCTGGGTAACAATCTTCGAGGGTAGCAGT	3	-24.3	No	No	Yes	No
	csrB	ackA	CAGGAAGCAATAGTTCAGGATGAACGATTGGCCGCAAGGCCAGAGGAAAAGTTGTCAAGGATGAGC	CTACGCTCTATGGCTCCCTGACGTTTTTTTA	1	-14.9	No	No	Yes	No
	chiX	bluR	AAGTGACGGCATAATAATAAAAAAATGAAATTCCTCTTTGACGGGCCAATAGCGATATTGGCCA	AGTATTATTGGGTCGTGTACAGGCGACGGAGATTTGTGACCGC	1	-22.5	No	No	No	Yes
	chiX	ybcK	ATAATAATAAAAAAATGAAATTCCTCTTTGACGGGCCAATAGCGATATTGGCCATTTTTTT	TCTTTTTAAATAAAAAATAAAC	1	-1.8	No	No	Yes	No
	cyaR	ytfK	CGCTGAAAAACATAACCCATAAAATGCT	ATAATAGTTGGGCCGATTGTGGCACCGCACAGGCGTAATACTCAGC	2	-11	No	No	Yes	Yes
	arrS	lpp	ATCCGATTTAAATATCGAGTCTCCTTGTTTCGACTTAAGCTGGCAATTGGATTGCCAGCTTTCTT	ATGGAGATTAACTCAATCTAGA	1	-9.9	No	No	No	Yes
	arcZ	opgD	TTTCCCTGGTGTTGGCGCAGTATTCGCGCACCCCGGTCTAGCCGGGGTCATTTTT	TCATAAATAAGCACTTTCTTGCCGCTGAAAACGACCAGCGCGGGACCATTCACAACACCAGAAGGACTC	52	-36.4	Yes	Yes	Yes	Yes
	arrS	rssA	AATCCGATTTAAATATCGAGTCTCCTTGTTTCGACTTAAGCTGGCAATTGGATTGCCAGCTTT	CTGAGTAGCACTATGTTAACCGAGCAGTAGCGATGTGGCTACGATTGCATTCCAGGGGAATCTTG	1	-23.3	No	No	No	Yes
	ffs	ompA	CTACTCTGTTTACCAGGTCAGGTCCGGAAGGAAGCAGCCAAGGCAGA	ATTGAGCAGATCCCCCGGTGAAGGATTTAAC	1	-14.7	No	No	Yes	No
	spf	sdhC	GTAGGGTACAGAGGTAAGATGTTCTATCTTTCAGACCTTTTACTTCACGTAATCGGATTTGGCTGAATATTTTAGCCGCCCCAGTCAGT	TAACAGAAAGTTAACCTCTGTGCCCGTAGTCCCCAGGGAATAATAAGAACAGCATGTGGGCGTTATTCATGATAAGAAATG	64	-26.6	Yes	Yes	Yes	No
	arrS	oppA	TTCGACTTAAGCTGGCAAT	TAAATAATAATCAATTGTTAAATTATTGT	1	-4.9	No	No	No	Yes
	gcvB	cfa	ACATTTACCCTGTCTGTCCATAGTG	CGGGGACAGGATCGTTCCCGACTCACTATGGATAGTCATTTCGGCAAGGGTTCC	18	-23.6	Yes	Yes	Yes	Yes
	arrS	mepS	GTAATCCGATTTAAATATCGAGTCTCCTTGTTTCGACTTAAGCTGGCAATTGGATTGCCAGCTTTCTTTTA	GTCTCGTGTCGCTTGGCATTTTTTTATAACGATATTTGTCGTTAAG	2	-16.9	No	Yes	Yes	No
	chiX	csgD	AAGTGACGGCATAATAATAAAAAAATGAAATTCCTCTTTGACGGGCCAATAGCGATATTGGCCATTTTTTT	AGATGTAATCCATTAGTTTTATATTTTACCCATTTAGGGCTGATTTATTACTACACACAGCAGTGCA	3	-13.1	No	Yes	Yes	Yes
	arcZ	cspD	TAGCCGGGGTCATTTTTTAG	GAACAGCCCCCTCTCTGACCCCGGTTTATTCCATCTTACTTGTATAAGATTTGCGAA	7	-21.6	Yes	No	Yes	Yes
	ryeA	yheS	TAAAAAGAGACCGAACACGATTCCTGTATTCGGTCCAGGGAAATGGCTCTTGGGAGAGAGCCGTGCGC	GCTCGCCCATACATTACATTATCATAATGATAAGT	1	-13.8	No	No	No	Yes
	arrS	rpsJ	GTAATCCGATTTAAATATCGAGTCTCCTTGTTTCGACTTAAGCTGGCAATTGGATTGCCAGCTTTCTTTT	TAATGGGTCTGAGGAGTAATCATTTTCGTTTATAAAATAATTGG	1	-14.5	No	No	Yes	No
	ryeA	rssA	ATAAAAAGAGACCGAACACGATTCCTGTATTCGGTCCAGGGAAATGGCTCTTGGGAGAGAGCCGTGCGCTAAAA	TAACGGCGTATTAACCGCCTGAGTAGCACTATGTTAACCGAGCAGTAGCGATGTGGCTACGAT	1	-32.3	No	No	No	Yes
	spf	cfa	CGTAATCGGATTTGGCTGAATATTTTAGCCGCCCCAGTCAGT	GTTGTTAAAGCTACGATAAATATTATGTTTTTACGGGGACAGGATCGTTCCCGACTCACTA	1	-14	No	No	Yes	No
	chiX	glmS	AAGTGACGGCATAATAATAAAAAAATGAAATTCCTCTTTGACGGGCCAATAGCGATATTGGCC	AATCTCCCTCCCACAAGCAGTAAC	1	-5.5	No	No	No	Yes
	ryeA	gss	GAAGGAAATGCTTCTGGCTTTTAACAGATAAAAAGAGACCGAACACGATTCCTGTATTC	CTCTGTCCGGTTAATGTCGCTGAGCAGGTAATCAGAGCACAACAATTACGCCAACTGCTTAGGTTGTATTGTTA	1	-18.2	No	No	No	Yes
	chiX	cfa	AAAGTGACGGCATAATAATAAAAAAATGAAATTCCTCTTTGACGGGCCAATAGCGATATTGGCCATTTTTTTA	GAGTTGTTAAAGCTACGATAAATATTATGTTTTTACGGGGACAGGATCGTTCCCGACTC	2	-16.2	No	No	Yes	Yes
	spf	ppc	GTACAGAGGTAAGATGTTCTATCTTTCAGACCTTTTACTTCACGT	CCAATGCGACGTGAAGGAT	1	-11.7	No	No	No	Yes
	arcZ	rssA	GCCAAGATTTCCCTGGTGTTGGCGCAGTATTCGCGCACCCCGGTCTA	TTCCAGGGGAATCTTGCGG	7	-24.3	Yes	Yes	No	No
	dsrA	opgD	GTTTCATCCCGACCCCCT	TAAGCACTTTCTTGCCGCTGAAAACGACCAGCGCGGGACCATTCACAACACCAGAAGGACT	1	-8.7	No	No	Yes	No
	spf	fdoG	GTAGGGTACAGAGGTAAGATGTTCTATCTTTCAGACCTTTTACTTCAC	AAATGGGACGTGACAATGTCGAAACAAGGAGCAATC	1	-13.8	No	No	No	Yes
	spf	kgtP	TTTTAGCCGCCCCAGTCAGT	TTTACAAAAAAAATAAACAAAAGCGACCGAC	10	-4.2	No	Yes	No	No
	omrB	pphA	TCCCAGAGGTATTGATAGGTGAAGTC	AAGAGCCATTTCCCTGGACCGAATACAGGAATCGTGTTCGGTCTCTTTTT	2	-11	No	No	No	Yes
	arrS	fdoG	ATCGAGTCTCCTTGTTTCGACTTAAGCTGGCAATTGGATTGCCAGCTTTCTTTTA	ACAATGTCGAAACAAGGAGC	15	-23.9	No	Yes	Yes	Yes
	ryeA	sdhC	TTCTGGCTTTTAACAGATAAAAAGAGACCGAACACG	GAAGCAGTGTTTTGCATG	1	-6.1	No	No	Yes	No
	gcvB	ompA	GCGTGTTCTGGTGAACTTTTGGCTTACGGTTGTGA	ATCGGTAGAGTTAATATTGA	1	-6.9	No	Yes	No	No
	cyaR	pphA	GCTGAAAAACATAACCCATAAAATGCT	TCTCCCAAGAGCCATTTCCCTGGACCGAATACAGGAATCGTGTTCGGTCTCTTTTTATCTGTTAAAAGCCAGAA	1	-6.8	No	No	Yes	No
	chiX	ompA	GACGGCATAATAATAAAAAAATGAAATTCCTCTTTGACGGGCCAATAGCGATATTGGCCATTTTTTTA	TATTGAGCAGATCCCCCGGTGAAGGATTTAACCGTGTTATCTCGTTGGAGATATTCATGG	2	-19.8	No	No	Yes	Yes
	cyaR	serA	AAACATAACCCATAAAAT	GGATGCAAATCCGCACACAACATTTCAAAAGACAGGAT	1	-2.4	No	Yes	No	No
	gcvB	ydiY	GCAATTGGTCTGCGATTCAGACCA	CTTTGATCCTTAAGAAAGTTTCCGGGA	1	-4.6	No	No	No	Yes
	cyaR	tig	CTGAAAAACATAACCCATAAAATGCTAGCTGTACCAGGAACCACCTCCTTAGCCTGTGTA	TTGAATGCTTTCGGGATGATTCTGGTAACAGGGAATGTGATTGATTATAAGAACATCCCGGTTCCGC	1	-20	No	No	Yes	No
	spf	gapA	GAATATTTTAGCCGCCCCAG	CGATTCCGCTTGACGCTGCGTAAGGTTTTTGTAATTTTACAGGCAACC	1	-7.2	No	No	Yes	No
	cyaR	glnA	CTGAAAAACATAACCCATAAAATGCTAGCTGTACCAGG	GGCGACACGGCCAAAATAATTGCAGATTTCGTTACCACGACGACCAT	1	-6.6	No	No	No	Yes
	gcvB	gltB	CTTCCTGTACATTTACCCTGTCTGTCCATAGTGATTAATGTAGCACCGCCT	GATGCGAAAAGGACAACAAGGGGGCGAATG	5	-17.8	No	No	Yes	No
	glmZ	yccX	AACTCCGGAATGACGCAGAGCCGT	AAATGGGCGTCATTGTCCGGAGTTT	1	-26.6	No	No	No	Yes
	csrB	fdoG	AGGCCAGGGACACTTCAGGATGAAGTATCACATCGGGGTGGTGTGAGCAGGAAGCAATAGTTCAGG	GCGAATGTAAATGGGACGTGACAATGTCGAAACAAGGAGCAATC	1	-10.6	No	No	Yes	No
	sroH	pphA	AATGGCGTTCTGAATACCAGAGATAATTCTCTGGCGAAACCCACCTTAAGGTGGGTTTTGTTATTTTG	AAGAGCCATTTCCCTGGACCGAATACAGGAATCGTGTTCGGTCTCTTTT	2	-20.3	No	Yes	No	Yes
	micA	ppiD	AAAGACGCGCATTTGTTATCATCATCCCTGAATTCAGAGATGAAATTTTGGCCACTCA	AGCGTTGTCCCCAGTGGGGATGTGACGAAGTTCAAGGGCGCATCTACTGATGTGCCTTTTTTA	5	-26.3	No	No	No	Yes
	mgrR	slyB	TAAAAGCAAAACACAAATCTATCCATGCAAGCATTCACCGCCGGTTTACTGGCGGTTTTTTT	TGGATTCACATATGCCATATACTTTGACCATGAGGGATGCTTGCGTGGCGTTT	25	-32.6	Yes	Yes	Yes	No
	mgrR	yifK	AAGCAAAACACAAATCTATCCATGCAA	TACCCATAACGATAACCGGTAACACCGGAAAGCATGCAAACACAACACG	1	-6.8	No	No	Yes	No
	arrS	rplJ	CGATTTAAATATCGAGTCTCCTTGTTTCGACTTAAGCTGGCAATTGGATTGCCAGCTTTCTTTT	AATTAAGACGCTCTCTCCGTTTGGAGGAGTGAAGTGAGTTCCAGAGATTTTCTC	1	-22.7	No	No	No	Yes
	gcvB	yfhM	TAGTGATTAATGTAGCACCGCCTAATTGCGGTGCTTTTTTTT	TTCGACGTTGCTAACGGGCCATTGTGGCAGGGATG	1	-14.1	Yes	No	No	Yes
	arrS	alaS	TTTAAATATCGAGTCTCCTTGTTTCGACTTAAGCTGGCAATTGGATTGCCAGCTTTCTTTT	ACTTTTCAGTTACCAGCCCGGCGGTTAAGACACGCTGGAGCTGGTGGCGATATTTCGTTAGC	1	-30.7	No	No	No	Yes
	gcvB	maeB	CTTCCTGTACATTTACCCTGTCTGTCCATAGTGATTAATGTAGCACCGCCTAAT	TAATGGTGAGAGTTTGGACTTGCTCAAAGTCTGTAGACTCCGGCAGGGTAATAATGTG	1	-29.8	Yes	No	No	Yes
	chiX	osmY	AAGTGACGGCATAATAATAAAAAAATGAAATTCCTCTTTGACGGGCCAATAGCGATATTGGCCATTTTTTTA	GAGGCTGTAATGGTCGTTATTCATCACTCATCGCTTTTGTGATGGCGACCATTGAC	1	-21.6	No	No	No	Yes
	dsrA	pphA	CCTGGTGTAACGAATTTTTTAAGTGCTTCTTGCTTAAGCAAGTTTCATCCCGACCCCCT	AGGAATCGTGTTCGGTCTCTTTTT	1	-6.3	No	No	No	Yes
	omrB	ompC	AGGTATTGATAGGTGAAGTCAACTTCGGGTTGAGCA	ACTGATTAATGAGGGTTAATCAGTATGCAGTGGCATAAAAAAGCAAATAAAGGCATATAACAGAGGGTTAAT	1	-12.2	No	No	Yes	No
	chiX	rplN	AGTGACGGCATAATAATAAAAAAATGAAATTCCTCTTTGACGGGCCAATAGCGATATTGGCCATTTTTTTA	TATGGGGATTTTTAACGACCTGATTTTCGGGT	1	-9.6	No	No	No	Yes
	arrS	yecA	GTAATCCGATTTAAATATCGAGTCTCCTTGTTTCGACTTAAGCTGGCAATTGGATTGCCAGCTTTCTTTT	ATAAAATCAAAGCAATAAGCAGTGTCGTGAAACCACCTTCGGGTGGTTTTTTTG	2	-17.5	No	Yes	No	Yes
	omrA	accB	GTACGCTCTTCGTACCCTGTCTCTTGCACCAACCTGCGCGGATGCGCAGGTT	TTGACACTCTGGGGCAAAA	1	-8.5	No	No	No	Yes
	spf	mdh	TAGGGTACAGAGGTAAGATGTTCTATCTTTCAGACCTTTT	TTAGGTTCCTGATTACGGCAATTAA	1	-7.1	Yes	Yes	No	No
	rybB	ompC	ATTAGTGCCACTGCTTTTCTTTGATGTCCCCATTTTGTGGAGCCCATCAACCCCGCCATTTCGGTTCA	AATGAGGGTTAATCAGTATGCAGTGGCATAAAAAAG	8	-28.9	Yes	No	Yes	Yes
	omrB	chiP	TCCCAGAGGTATTGATAGGTGAAGT	TGGTGCAGCAATTTATACGTCAAAGAGGATT	1	-11.4	No	No	No	Yes
	arrS	malE	GTAATCCGATTTAAATATCGAGTCTCCTTGTTTCGACTTAAGCTGGCAATTGGATTGCCAGCTTTCTTTTA	GTGTTTTCACGAGCACTTCACCAACAAGG	1	-11.5	No	No	Yes	No
	gcvB	tcdA	ATTGGTCTGCGATTCAGACCATGGTAGCAAAGCTACCTTTTTTCACTTCCTGTACATTTACCCTGTCTGTCCATAGTGATTAATGTAGCACCGCCTAATTGCGGTGCTTTTTTTT	CGTTTTTACGGATATGACAGGGTGAGGGG	45	-26.3	No	Yes	Yes	Yes
	chiX	nuoA	GGCATAATAATAAAAAAATGAAATTCCTCTTTGACGGGCCAATAGCGATATTGGCCATTTTTTT	TGAATCGATGTGGCGTCCATCTGCCGTGAAGAGCAGTGAATCTGGCGCTACT	1	-21.6	No	No	No	Yes
	gcvB	accB	CTGTCCATAGTGATTAATGTAGCACCGCCTAATTGC	TATTTTGTTTTTTGCCGGAGGATAGCAGCAGATCGC	1	-12.6	No	No	No	Yes
	arrS	lrhA	GTAATCCGATTTAAATATCGAGTCTCCTTGTTTCGACTTAAGCTGGCAATTGGATTGCCAGCTTTCTTTT	TTTACTTTCGTCCGGGTTCCGGATGAAACTGCCAGGGAGGCACATTACAAATGGAATTGCTTGT	1	-28.2	No	No	Yes	No
	spf	csgD	TCAGACCTTTTACTTCACGTAATCGGATTTGGCTGAATATTTTAGCCGCCCCAGTCAGTA	TTTATTACTACACACAGCAG	1	-6	No	No	No	Yes
	gcvB	rpoB	CCCTGTCTGTCCATAGTGATTAATGTAGCACCGCCTAAT	ATGGACAGATGGGTCGAC	11	-21.3	No	Yes	No	Yes
	spf	pphA	TAGGGTACAGAGGTAAGATGTTCTATCTTTCAGACCTTTTACTTCACGTAATCGGATTTGGCTGAATATTTTAGCCGCCCCAGTCAGT	CAAGAGCCATTTCCCTGGACCGAATACAGGAATCGTGTTCGGTCTCTTTTT	6	-22.6	No	No	Yes	Yes
	spf	hfq	ATCTTTCAGACCTTTTACTTCACGTAATCGGATTTGGCTGAATATTTTAGCCGCCCCAGTCAGT	TATCGTGCGCAATTTTTTCAGAATCGAAAGGTTCAAAGTACAAATAAGCATAT	1	-16.2	No	No	No	Yes
	csrB	panD	GTTGTCAAGGATGAGCAGGGAGCAACAAAAGTAGCTGGAATGCTGCGAA	TTTCCTCAAAGCAGGCATCGCCTGCTTCGTTAACGACAGGGTAGAAAGGTA	1	-24.3	No	No	No	Yes
	micF	pphA	TTTCTGAATGTCTGTTTACCCCTATTTCAACCGGATGCCTCGCATTCGGTTTTTTTTAC	AAGAGCCATTTCCCTGGACCGAATACAGGAATCGTGTTCGGTCTCTT	1	-21	No	No	No	Yes
	rdlA	pphA	TGTTCTGGTTCAAGATTAGCCCCCGTTCTGTTGTCAGGTTGT	AAGAGCCATTTCCCTGGACCGAATACAGGAATCGTGTTCGGTCTCT	1	-16.3	No	No	No	Yes
	ffs	tig	GCCAAGGCAGATGACGCGTGTGCCGGGATGTAG	GATTGATTATAAGAACATCCCGGTTCCGCG	2	-26.5	No	Yes	No	No
	rdlC	fdoG	ACGTGCGGGGGTTTTCTC	CAAGCGAATGTAAATGGGACGTGACAATGTCGAAACAAGGAGCA	1	-7.4	No	No	No	Yes
	ryeA	yeaG	TTTGCGTGCAAAATGGTCAATAAAAAGCGTGGTGGTCATCAGCTGAAATGTTAAAAACCGCCCGTTCTGG	ACCTCTTCCGGGAGCCTCTACTATTCATATGAACGG	1	-13.4	No	No	No	Yes
	arcZ	pphA	TTTCCCTGGTGTTGGCGCAGTATTC	AAGAGCCATTTCCCTGGACCGAATACAGGAATCGTGTTCGGTCTCTTTTTATCTGTTAAAAGCCAGAA	1	-15.6	No	No	No	Yes
	arrS	rpsM	CCGATTTAAATATCGAGTCTCCTTGTTTCGACTTAAGCTGGCAATTGGATTGCCAGCTTTCTTT	ATATTTTTCTTGCAAAGTTGGGTTGAGCTGGCTAGATTAGCCAGCCAATCTTTTGT	1	-27.9	No	No	Yes	No
	gcvB	gltI	TTACGGTTGTGATGTTGTGTTGTTGTGTTTGCAATTGGTCTGCGATTCAGACCATGGTAGCAAAGCTACCTTTTTTCACTTCCTGTACATTTACCCTGTCTGTCCATAGTGATTAATGTAGCACCGCCTAAT	GCACAATAAAGTTGCAGACGATAACAACACAAACACTCACAA	17	-37.1	Yes	Yes	Yes	No
	spf	ytfK	TTTTAGCCGCCCCAGTCAGT	ATAGTTGGGCCGATTGTGGCACCGCA	1	-13.1	No	No	No	Yes
	psrD	pphA	AGCCATTTTAAACTATGCGCTTCGTTTTGC	CCCAAGAGCCATTTCCCTGGACCGAATACAGGAATCGTGTTCGGTCTCTTT	1	-7	No	No	No	Yes
	ryeA	ytfK	GATAAAAAGAGACCGAACACGATTCCTGTATTCGGTCCAGGGAAATGGCTCTTGGG	TTAAAATTTGCGCCTCATAATAGTTGGGCCGATTGTGGCACCGCACAGGCGTAATACTCAGCAGGAG	1	-27.2	No	No	Yes	No
	gcvB	alx	ATTGCGGTGCTTTTTTTT	CGGAAGGCGAGGTCTATGCATAAAAAGCAGCGGCTGACG	1	-12.3	No	Yes	No	No
	ryeA	cfa	CTGGCTTTTAACAGATAAAAAGAGACCGAACACGATTCCTGTATTCGGTCCAGGGAAATGGCTCTTGGG	ATGGATAGTCATTTCGGCAAGGGTTCCTCCT	2	-14	No	No	No	Yes
	chiX	cfa	AAGTGACGGCATAATAATAAAAAAATGAAATTCCTCTTTGACGGGCCAATAGCGATATTGGCCATTTTTT	AGTCATTTCGGCAAGGGTTCCTCCTTTCCCTCTGTT	1	-13.5	No	No	No	Yes
	omrB	rpoE	TATTGATAGGTGAAGTCAACT	GCTTGCTCAAATTGCAGCTAATGGAGTGGCGTTTCGATAGCGCGTGGAAATTTGGTTTGGGGAGACTTTACCT	1	-15.4	No	No	Yes	No
	gadY	cfa	TATCCTCTTCCCGGTCCCCTATG	ATGTTTTTACGGGGACAGG	1	-14.9	No	No	No	Yes
	cyaR	tnaA	CTGAAAAACATAACCCATAAAATGCTAGCTGTACC	CTCGTTTATTTACTTGTTTTAGTAAATGATGGTGCTTGCATATATATCTGGCGAATTAATCGGTATAGCAGATGTAAT	2	-12.6	No	No	Yes	No
	omrB	iclR	TCCCAGAGGTATTGATAGGTGAAGTCAACT	TTAGCTAACAATAAAAATGAAAA	1	-9.2	No	No	Yes	No
	omrA	yeaJ	ATTATTCGGTACGCTCTTCGTACCCTGTCTCTTGCACCAACCTGCGCGGATGCGCAGGTTTTTT	CCTGTGCCAGGCCGCAATCGAACTTTATCTGG	1	-19.5	No	No	Yes	No
	arrS	cfa	AATATCGAGTCTCCTTGTTTCGACTTAAGCTGGCAATTGGATTGCCAGCTTTCT	AGTTGTTAAAGCTACGATAAATATTATGTTTTTACGGGGACAGGATCGTTCCCGACTCACTATGGA	1	-22.4	Yes	No	Yes	No
	rdlC	pphA	GTTTCAAGATTAGCCCCCGTTTTGTTGTCAGGTTTTACCTCTCAACGTGCGGGGGTTTTCTCT	CAAGAGCCATTTCCCTGGACCGAATAC	1	-15.5	No	No	Yes	No
	cyaR	fbaA	AAAAACATAACCCATAAAATGCTAGCTGTACCAGGAACCACCTCCTTAGCCTGTGTAATCTCC	CAGACGCAGCACATGCAACTTGAAGTATGACGAGTATAAGGCCCGACGATACAGGAC	4	-14.2	No	No	Yes	No
	micA	prkB	AAGACGCGCATTTGTTATCATCATCCCTGAATTCAGAGATGAAATTTTGGCCACTCACGAGTGGCCTTTTTCTTT	CGGCGGACGAGATAATAATGATAGCTAAGTCA	1	-18.4	No	No	No	Yes
	cyaR	nuoA	CTGAAAAACATAACCCATAAAATGCTAGCTG	ATTTTTTCCATTGCTTCACAACGGACACGATTCAACAACATCTAATTATCCTGGAGTCGT	1	-3.5	No	No	Yes	No
	ryeA	osmY	AGATAAAAAGAGACCGAACACGATTCC	ATCACTCATCGCTTTTGTGATGGCGACCATTGACTT	1	-6	No	No	No	Yes
	gcvB	rpoB	AATTGGTCTGCGATTCAGACCATGGTAGCAAAGCTACCTTTTTTCACTTCCTGTACATTTACCCTGTCTGTCCATAGTGATTAATGTAGCACCGCCTAATTGCGGTGCTTTTTTT	CCGCTCAATGGACAGATGGGTCGACTTGTCA	15	-25.9	No	Yes	No	Yes
	ffs	yoeI	GGGGGCTCTGTTGGTTCTCCCGCAACGCTACTCTGTTTACCAGGTCAGGTCCGGAAGGAAGCA	AATGCGCCGCTGTCAAAAAATGACTAAAAACCGACGTTTCATCAGCGTCGGTTATTTT	1	-19.8	No	No	No	Yes
	ryeA	rplM	AAAAGAGACCGAACACGATTCCTGTATTCGGTCCAGGGAAATGGCTCTTGGG	TGTGTGCTGGCATAGGCTATTCGAAGGGGTAGGTTTGCCGGACTTTGTCGTGTGAACCTCAACA	1	-29.5	No	No	No	Yes
	sdsR	lpp	ACTAAGCCTGCATTAATGCCAACTTTT	CTACATGGAGATTAACTCAATCTAGAGGGT	1	-5.7	No	Yes	No	No
	gcvB	ilvC	CTTCCTGAGCCGGAACGAAAAGTTTTATCGGAATGCGTGTTCTGGTGAACTTTTGGCTTACGGTTGTGATGTTGTGTTGTTGTGTTTGCAATTGGTCTGCGATTCAGACCATGGTAGCAAAGCTACCTTTTTTCACTTCCTGTACATTTACCCTGTCTGTCCA	ATCTCGCAAACGCGAACCGAACAATAAGAAGCACAACATCACGAGGAATC	6	-36.2	No	Yes	Yes	No
	dsrA	gltA	TAAGTGCTTCTTGCTTAAGCAAGTTTCATCCCGACCCCCTCAGGGTCGGGATTTTTTT	TTATGAAGTCGGTATTTCACCTAAGATTAACTTATGTAACAGTGTGG	1	-11.7	No	No	No	Yes
	cyaR	mepS	CTGAAAAACATAACCCATAAAATGC	CCTTAAGGAATTGTTTCAACATGCCCAGGTAATTAGT	1	-4.5	No	No	Yes	No
	arcZ	opgD	TTTCCCTGGTGTTGGCGCAGTATTC	ACTTTCTTGCCGCTGAAAACGACCAGCGCGGGACCATTCACAACACCAGAAGGA	16	-21.2	Yes	Yes	Yes	Yes
	sibD	fabF	CTTCTTCGGGAGGGGCTTTC	TTGTCCCACTAGAATCATTTTTTCCCTCCCTGGAG	2	-18.9	No	No	Yes	No
	ffs	pphA	GTTTACCAGGTCAGGTCCGGAAGGAAGCAGCCAAGGCAGATGACGCG	CAAGAGCCATTTCCCTGGACCGAATACAG	1	-18.6	No	No	No	Yes
	omrB	glpF	CCAGAGGTATTGATAGGTGAAGTCAACTTCGGGTTGAGC	CATGCCTACAAGCATCGTG	1	-8.7	No	Yes	No	No
	gcvB	asnB	GGCTTACGGTTGTGATGTTGTGTTGTTGTGTTTGCAATTGGTCTGCGAT	CAAGCAAACACAACAAGCAACAAATAC	15	-26.3	No	Yes	Yes	Yes
	spf	gltJ	GGGTACAGAGGTAAGATGTTCTATCTTTCAGACCT	CAATACGCTGGGTAACAATCTTCGAGGGTAGC	1	-8.8	No	No	Yes	No
	arcZ	ymjA	TTCCCTGGTGTTGGCGCAGT	ATGCTTAGCGCATTAACCCCAGGGGCAAAT	2	-22.6	No	No	Yes	No
	spf	secG	GGGTACAGAGGTAAGATGTTCTATCTTTCAGACCTTT	AAAAACTCCCGCTTTATTG	1	-5	No	No	Yes	No
	ryeA	ycjX	TTCCTGTATTCGGTCCAGG	TTACGAATGATTTTTTTTCTGGTCTTCAGAGCAGCACAG	1	-10.6	No	No	Yes	No
	mgrR	alx	AAAAGCAAAACACAAATCTATCCATGCA	ACGATGTGTGAAAAAACACA	1	-6.4	No	No	Yes	No
	gcvB	argT	CTTCCTGAGCCGGAACGAAAAGTTTTATCGGAATGCGTGTTCTGGTGAACTTTTGGCTTACGGTTGTGATGTTGTGTTGTTGTGTTTGCAATTGGTCTGCGATTCAGACCATGGTAGCAAAGCTACCTTTTTTCACTTCCTGTACATTTACCCTGTCTGTCCATAGTGATTAATGTAGCACCGCCTAA	ATTTAACGTTGAATGTTACTGTTGTCGTCAAGATGGCATAAGACCTGCATGAAAGAGCCTGCAAACACACAACACAATACACAACATAAAAA	127	-56.3	Yes	Yes	Yes	Yes
	oxyS	mepS	TTTAACCCTTGAAGTCACTGCCCGTTTCGAGAGTTTCTCAA	GCATTTTTTTATAACGATATTTGTCGTTAAGGACTTCAAGGGAAAACA	12	-22.9	Yes	Yes	Yes	Yes
	gcvB	livK	GGTTGTGATGTTGTGTTGTTGTGTTTGCAATTGGTCTGCGA	CACATAAAAACAAAGCAACACAACATCACGAATG	12	-31.4	Yes	Yes	Yes	No
	gadY	ytfK	CGTGCCAACAGGGAGTGTTATAACGGTTTATTAGTCTGGAGACG	TTTGCGCCTCATAATAGTTGGGCCGATTGTGGCACC	1	-21.4	No	No	Yes	No
	gadY	map	AGTTTCCCGTGCCAACAGGGAGTGTTATAACGGTTTATTAGTCTGGA	CACTTACATATATATTG	1	-4.8	No	No	Yes	No
	gadY	mdh	ACGGTTTATTAGTCTGGAGACGGCAGACTATCCTCTTCCCGGTC	AAGTTAGGTTCCTGATTACG	1	-9.6	No	No	Yes	No
	mgrR	ytjA	AGCGTAAAAGCAAAACACAAATC	ATTCGTCCTCCCGAACTTTGTCGGGAGGCGCGATGTGCA	1	-8.2	No	No	Yes	No
	mgrR	mtn	CGATTCGTTATCAGTGCAGGAAAATGCCTGTTAGCGTAAAAGCAAAACACAAATCTATCCATGCAAGCATTCACCGCCGGTTTAC	TCAAATCGGGCTTATCGCGA	1	-9.5	No	No	No	Yes
	gcvB	asnB	GAAAAGTTTTATCGGAATGCGTGTTCTGGTGAACTTTTGGCTTACGGTTGTGATGTTGTGTTGTTGTGTTTGCAATTGGTCTGCGATTCAGACCATGGTAGCAAAGCTACCTTTTTTCACTTCCT	CAAGCAAACACAACAAGCAACAAATAC	38	-26.3	No	Yes	Yes	Yes
	gcvB	nuoA	CTGTACATTTACCCTGTCTGTCCATAGTGATTAATGTAG	ATCGATGTGGCGTCCATCTGCCGTGAAGAGCAGTGAATCT	1	-12	No	No	Yes	No
	gcvB	gltF	CTTCCTGAGCCGGAACGAAAAGTTT	TTATTTTAAAAAATAAA	1	-0.2	No	Yes	No	No
	omrB	csgD	TGGTGATCCCAGAGGTATTGATAGGTGAAGTCAACTTCGGGTTGAGCACATGAATTAC	AATCCATTAGTTTTATATTTTACCCATTTAGGGCTGATTTATTACTACACACAGCAGTGCAACATCTGTCAGTACTTCTGGTGCTTCT	125	-37.1	Yes	Yes	Yes	Yes
	cyaR	nuoA	GCTGAAAAACATAACCCATAAAATGC	CGATGTGGCGTCCATCTGCCGTGAAGAGCAGTGAATCTGGCGCTACTTTTGATG	2	-7.5	No	Yes	No	Yes
	arcZ	tag	TTCCCTGGTGTTGGCGCAGTATT	TTTTTTTATGATCATTAACACGACTCCAGGGAAGAGCCGA	8	-20.2	No	No	Yes	Yes
	gcvB	argT	GTTCTGGTGAACTTTTGGCTTACGGTTGTGATGTTGTGTTGTTGTGTTTGCAATTGGTCTGCGATTCAGACCATGGTAGCAAAGCTACCTTTTTTCACTTCCTG	ATAAGACCTGCATGAAAGAGCCTGCAAACACACAACACAATACACAACA	78	-44.5	Yes	Yes	Yes	Yes
	mgrR	sdhC	CGATTCGTTATCAGTGCAGGAAAATGCCTGTTAGCGTAA	TAACCTCTGTGCCCGTAGTCCCC	1	-8.3	No	No	No	Yes
	gcvB	hemC	TGTGATGTTGTGTTGTTGTGTTTGCAATTGG	TTCACCACAACACTGACATCAC	2	-22.4	No	No	Yes	No
	gcvB	ygdG	GAGCCGGAACGAAAAGTTTTATCGGAATGC	AAAGGCCTCGTTTTGCGAGGCCTCTTCCCGATTTCTCATCCAGCCGTAGCCTGTTCCGGCATCGAATGT	3	-21.3	No	No	Yes	No
	gadY	murB	AGGGAGTGTTATAACGGTTTATTAGTCTGGAGAC	GTTTTTGCATCAGGAAAGCAGC	1	-4.7	No	Yes	No	No
	rybB	nuoA	CCCCGCCATTTCGGTTCAAGGTTGATGGGTTTTTTG	GGTTTTTTTTATTCCTCCCCATGAATCGATGTGGCGTC	3	-26.4	No	No	Yes	No
	spf	aroK	TTTTAGCCGCCCCAGTCAGT	GATTTGAGAGTTGGTGCTCTTCGCTGCCTGCGTTCCATGATGATGATTTATCATTCAGGCGGCATTTTG	1	-17	No	Yes	No	No
	ffs	fdoG	AGGCAGATGACGCGTGTGCCGGGATGTA	ATTCTGGACCTTTGCGGCCCCTTCCGCAAAGAAAAATAACTCCCACTCCCTGCACACGCAGCAAGCGAATGTAAATGGGACGTGACAATGTCGAAACAAGGAGCAATC	10	-26.8	No	No	No	Yes
	arrS	hdfR	ATCGAGTCTCCTTGTTTCGACTTAAGCTGGCAA	ATTTAAATCATAACGACAAATAATTTTGCGGAGA	2	-8.7	No	No	No	Yes
	rprA	oppA	TGCTGTGTGTAGTCTTTGCCCATCTCCCA	GCAAAATGTATTGGCGAGTAAGAACCGCATTTGGTACTTTCCGGGCA	1	-13.3	No	No	Yes	No
	spf	cydA	CAGAGGTAAGATGTTCTATCTTTCAGA	CGTGTGACCCTTTCTAACGGGGTTCACTCTCGGAGTC	1	-5.4	No	No	Yes	No
	chiX	yahM	GCATAATAATAAAAAAATGAAATTCCTCTTTGACGGGCCAATAGCGATATTGGCCATTTTTTT	GTGTGGGGTCTTTTCTGTATCTTACGCATCGCACTCAAGCCTGACAGAAAATATGCTGTAAGGCTCATA	1	-18.9	No	Yes	No	No
	spf	sxy	TAGGGTACAGAGGTAAGATGTTCTATCTTTCAGACCTTTTACTTCACGTAATCGGATTTG	ACGGATCCGTTAATGTGAATCATTCTTTTATG	1	-17.4	No	Yes	No	No
	spf	yjgL	TAGGGTACAGAGGTAAGATGTTCTATCTTTCAGACCTTTTACTTCACGT	GTTTTTTGATATTTTTTT	1	-3.8	No	Yes	No	No
	spf	kgtP	TAGGGTACAGAGGTAAGATGTTCTATCTTTCAGACCTTTTACTTCAC	TTTACAAAAAAAATAAACAAAAGCGACCGACAAAAGCATCGGATTACGGCAGGAGACATAAT	2	-7.4	No	Yes	No	No
	arrS	ftsB	AATATCGAGTCTCCTTGTTTCGACTTAAGCTGGCAATTGGATTGCCAGCTTTCTT	ACAGAGGATGTAGAGTCGTCTTCGGATGCATGGGATGATGATGCCGTTTTTCAGGGGGC	1	-22.8	No	No	Yes	No
	chiX	rpsJ	CGGCATAATAATAAAAAAATGAAATTCCTCTTTGACGGG	AACAATGCTCCCAATCGGGGAGCTACGT	1	-11.7	No	No	Yes	No
	cyaR	rplN	CTGAAAAACATAACCCATAAAATGCTAGCTGT	GTAGTTGACATTAGCGGAGCAC	1	-8.3	No	No	Yes	No
	sroH	ompA	AATACCAGAGATAATTCTCTGGCGAAACCCACCTTAAGGTGGGTTTTGTTATT	ATCGGTAGAGTTAATATTGAGCAGATCCCCCGGTGAAGGAT	1	-17.8	No	Yes	No	No
	arcZ	murR	TTCCCTGGTGTTGGCGCAGTATTCGCGCACCCCGGTCTAGCCGGGGTCATTTTT	ATTTATGCTGCCAGCCCAGGAGAGTGG	1	-25.1	No	No	No	Yes
	gcvB	tnaC	GTCCATAGTGATTAATGTAGCACC	GTGTCTTGCGAGGATAAGT	1	-6	No	No	Yes	No
	ryhB	yncE	ATTGCTCACATTGCTTCCAGTATT	TAGCGAAGCATTGTGAAGCAGCA	1	-20	Yes	Yes	No	No
	cyaR	tufB	AAAACATAACCCATAAAAT	AGTCGGGCATGTTGCCTGGTTGATGTGGTGATA	1	-7.9	No	No	Yes	No
	gcvB	icd	GTGTTGTTGTGTTTGCAATTGGTCTGCGATTCAGACCATGGTAGCA	TAACGCGCATCTTTCATGACG	1	-8.9	Yes	No	No	Yes
	gcvB	ytfK	GTCTGCGATTCAGACCATGGTAGCAAAGCTACCTTTTTTCACTTCCTG	ATAGTTGGGCCGATTGTGGCACCG	1	-13.5	No	No	Yes	No
	cyaR	corA	CTGAAAAACATAACCCATAAAATGCTAGCTGTACCAGGAACCACCTCCTTAGCCTGTGTAATCT	TCACTCTAAGAGGACATTCGCCTTGGACACACCCAGTAGATACTGGCTC	1	-20.6	No	No	Yes	No
	sibE	ydiY	AAGGGTAAGGGAGGATTTCTCCCCCCTCTGA	AATCTTTGATCCTTAAGAAAGTTTCCGGGACCGCGATGG	1	-13.5	No	No	Yes	No
	chiX	rplJ	ATTCCTCTTTGACGGGCCAATAG	TGTTCGTTGGAGCCTGGCCTATCCAGGCCTCCGTCGAAGACC	1	-20.2	No	No	Yes	No
	ffs	mgtA	GGGATGTAGCTGGCAGGGC	TTAACGTCCCTGCTCAGCTTTATT	1	-21.5	No	Yes	No	No
	ffs	rpoE	CCCGCAACGCTACTCTGTTTA	TAATGGAGTGGCGTTTCGATAGCGCGTGGAAATTTGGTTTGGGGAGAC	4	-23.2	No	No	No	Yes
	omrB	yjhX	ATTGATAGGTGAAGTCAACTTCGGGTTGAGCA	CGTAAATACCTTTCAACTCAACCCGAGGCTTTGATGCTGGAGAA	6	-24.7	No	Yes	Yes	No
	mgrR	cirA	AGCGTAAAAGCAAAACACAAATCTATCCATGC	ATGCTGCCGTACGCAAGGGGACGT	1	-11.8	No	Yes	No	No
	spf	rpoE	TAGGGTACAGAGGTAAGATGTTCTATCTTTCAGACCTTTTACTTCAC	CTAATGGAGTGGCGTTTCGATAGCGCGTGGAAATTTGGTTTGGGGAGACTTTAC	1	-17.5	No	No	Yes	No
	gcvB	efp	TTGCAATTGGTCTGCGATTCAGACCATGGTAGCAAAGCTACCTTTTT	TTTTGTGGCTTAGCTACCAATT	1	-21.9	No	Yes	No	No
	gcvB	dcyD	ACTTCCTGAGCCGGAACGAAAAGTTTTATCGGAATGCGTGTTCTGGTGAACTTTTGGCTTACGGTTGTGATGTTGTGTTGTTGTGTTTGCA	ATCACAACAACACACATCGGAG	4	-24.3	Yes	Yes	Yes	Yes
	spf	insA_6	TTTCAGACCTTTTACTTCACG	GATGGAGCCTCTGCTTCTGGCATG	1	-7.1	No	No	Yes	No
	omrB	ytfK	AGTCAACTTCGGGTTGAGC	ATAGTTGGGCCGATTGTGGCACCGCACAGGCGTAATACTCA	1	-12.8	No	No	Yes	No
	ssrS	prs	AAATTTCTCTGAGATGTTCGCAAGCGGGCCAGTCCCCTG	CATGCCTGGCCCGCACAGTTT	3	-21.7	No	No	No	Yes
	oxyS	glmS	AACCCTTGAAGTCACTGCCCGTTTCGAGAGTTTCTCAACT	CCGGTCACATGGGATGAGGAGATAACATAATCTCCCTCCCACA	1	-9.2	No	No	Yes	No
	gcvB	uspG	AATGCGTGTTCTGGTGAACTTTTGGCTTACGGTTGTGATGTTGTGTTGTTGTGTTTGCAATTGGTCTGCGA	ATTTGTTCATGATTAAC	1	-7.1	No	No	Yes	No
	gcvB	artJ	ATTTACCCTGTCTGTCCATAGTGATTAATGTAGCACCGCCTAATTGCGGTGCTTTTTTTT	TTGACAGACGGGAGTTCCAT	3	-18.6	No	No	Yes	No
	cyaR	cfa	CTGAAAAACATAACCCATAAAATGCTAGCTGT	TATGGATAGTCATTTCGGCAAGGGTTCCTCCTTTCC	1	-11.5	No	Yes	Yes	No
	spf	sdhC	TGACTGGGGCGTTTTTT	CAGGTAACAGAAAGTTAACCTCTGTGCCCGTA	1	-9	Yes	No	No	Yes
	sibB	ytfK	GAGGGTAGAGCGGGGTTTCCCCCGCCCTGGTAGTCT	ATAGTTGGGCCGATTGTGGCACCGCACAGGCGTAATACT	1	-17	No	No	Yes	No
	cyaR	kgtP	CTGAAAAACATAACCCATAAAATG	CGACCGACAAAAGCATCGGATTACGGCAGGAGAC	1	-3.2	Yes	No	Yes	No
	gcvB	dcyD	GTGTTCTGGTGAACTTTTGGCTTACGGTTGTGATGTTGTGTTGTTGTGTTTGCAATTGGTCTGCGATTCAGACCATGGTAGCAAAGCTACCTTTTTTCACTTCCTGTA	ATAAGAAAATCACAACAACACACATCGGAGGCT	23	-27.3	Yes	Yes	Yes	Yes
	mgrR	rpoE	CGATTCGTTATCAGTGCA	AGATTCTGTAGACTTATAATGATAGATAATGATCCGTCTACAGCAT	1	-10.6	No	No	Yes	No
	spf	ompC	TAGGGTACAGAGGTAAGATGTTCTATCTTTCAGACCTTTTACTTCACGTAATCGGATTTGGCTGAA	GCCGACTGATTAATGAGGGTTAATCAGTATGCAGTGGCAT	2	-20.1	No	Yes	Yes	No
	cyaR	galU	CTGAAAAACATAACCCATAAAATGC	TGATATACTGGGATGCGATACAG	1	-6.5	No	No	No	Yes
	cyaR	rpoE	CTGAAAAACATAACCCATAAAATGCT	GAAATTTGGTTTGGGGAGACTTTACCTC	1	-6.7	No	No	No	Yes
	cyaR	ompA	GCTGAAAAACATAACCCATAAAATGCTAG	ATCGGTAGAGTTAATATTGAGCAGATCCCCCGGTGAAGGATT	2	-7	Yes	No	Yes	No
	cyaR	oppA	GCTGAAAAACATAACCCATAAAATGC	TCCGAGCCTGTGCAGGGTCCCAATCCGGGATTACACATGCTGGTTAATACCA	2	-6.4	Yes	Yes	Yes	No
	cyaR	rpsJ	GCTGAAAAACATAACCCATAAAATGCT	TGAGGAGTAATCATTTTCG	1	-5.4	No	No	Yes	No
	cyaR	malM	GCTGAAAAACATAACCCATAAAATGCT	TTAGCGCGCTATTGCCTGGCTACCGCTGAGCTCCAGATTTTGAGGT	1	-5.9	No	No	Yes	No
	spf	rpsM	ACGTAATCGGATTTGGCTGAATATTTTAGCCGCCCCAGTCAGT	ATGTCTGTGCGTTTCCATTTGAGTATCCTGAA	1	-12.7	No	No	Yes	No
	arrS	cnu	GTAATCCGATTTAAATATCGAGTCTCCTTGTTTCGACTTAAGCTGGCAATTGGATTGCCAGCTTTCTTTTA	ACTTTTGGTGAAATTTTATCATC	1	-5.9	No	No	Yes	No
	cyaR	mdh	GCTGTACCAGGAACCACCTCCTTAGCCTGTGTAATCTC	AAGTTAGGTTCCTGATTACGG	2	-17.9	Yes	No	No	Yes
	mgrR	ybhA	ATCCATGCAAGCATTCACCGCCGGTTTAC	AGCTAAAATTAGTCGCTTTTGGCGGTGAATGCTGAAT	6	-27.2	No	No	Yes	No
	chiX	cspD	GTGACGGCATAATAATAAAAAAATGAAATTCCTCTTTGACGGGCCAATAGCGATATTGGCCATTTTTTTA	AGAGTTGGCGAGGTTTTGAACA	1	-12.1	No	No	Yes	No
	gcvB	cbpA	TGTTGTGTTGTTGTGTTTGCAATTGGTCTGCGATTCAGACCATGGTAGCAAAGCTACCTTTTTTCACTTCC	AGTTACCTTACAGGGGTTCCTTCAATTTGTGTTGATTTACGCGA	1	-17.5	No	No	Yes	No
[truncated: 111 more rows]
