# Supplementary material for: Hfq CLASH uncovers sRNA-target interaction networks linked to nutrient availability adaptation
Source: eLife. 2020 May 1;9:e54655. doi: 10.7554/eLife.54655 (PMC7213987; doi:10.7554/eLife.54655)
Supplement: Supplementary file 4. — Shown are the statistically filtered sRNA-sRNA interactions identified in the Hfq CLASH data. Genomic sequences of the sRNA fragments found in the chimeras are also provided. Total_hybrids indicates the total number of interactions involving these sequences that were found. Min. MFE indicates the minimal folding enrgies of the chimera, which was calculated using RNADuplex from the ViennaRNA package (Lorenz et al., 2011). The last column indicates which of the sRNA-mRNA interactions were also found in the RIL-seq S-chimera data (Melamed et al., 2016). [file elife-54655-supp4.xlsx]

## Sheet: Supplementary File 4
Supplementary File 4 Overview of sRNA-sRNA interactions found in the Hfq CLASH data and compared to the RIL-seq data					References:
Shown are the statistically filtered sRNA-sRNA interactions identified in the Hfq CLASH data.					[1] Lorenz, R. et al. ViennaRNA Package 2.0. Algorithms Mol. Biol. (2011). doi:10.1186/1748-7188-6-26
Genomic sequences of the sRNA fragments found in the chimeras are also provided.					[2] Melamed, S., Peer, A., Faigenbaum-Romm, R., Gatt, Y. E., Reiss, N., Bar, A., … Margalit, H. (2016). Global Mapping of Small RNA-Target Interactions in Bacteria. Molecular Cell, 63(5), 884–897.
Total_hybrids indicates the total number of interactions involving these sequences that were found.
Min. MFE indicates the minimal folding enrgies of the chimera, which was calculated using RNADuplex from the ViennaRNA package [1]
The last column indicates which of the sRNA-mRNA interactions were also found in the RIL-seq S-chimera data [2]
	sRNA#1	sRNA#2	sRNA#1 fragment (5'-3')	sRNA#2 fragment (5'-3')	total_hybrids	min. MFE	in RIL-seq?	in RNase E CLASH?	Exponential Phase	Transition Phase	Stationary Phase
	arcZ	spf	TTCCCTGGTGTTGGCGCAGT	GGATTTGGCTGAATATTTTAGCCGCCCCAGTCAGTA	2	-12.2	No	No	No	Yes	Yes
	arcZ	gadY	TTCCCTGGTGTTGGCGCAGTATTCGCGCACCCCGGTCTAG	GTTTCCCGTGCCAACAGGGAGTGTTATAACGGTTTATTAGTCTGGAGACGGCAGACTATCCTCTTCCCGGTCCCCTATGCCGGGTTTTTTTTA	3	-22	No	No	No	No	Yes
	arcZ	rdlD	TTCCCTGGTGTTGGCGCAGTATTCGCGCACCCCGGTCTAGCC	AGATTAGCCCCCGTGGTGTTGTCAGGTGCATACCTGCAACGTGCGGGGGTTTTCTCTCTCCAGCAACCAATGCCACCAGGGATAAAGC	5	-36.1	No	No	Yes	No	Yes
	arcZ	gadY	GTGCCCTTGTAACTCATCATAATAATTTACGG	CGGTTTATTAGTCTGGAGACGGCAGACTATCCTCTTCCCGGTCCCCTATGCCGGGTTTTTTTTAT	1	-10.4	No	No	No	Yes	No
	arcZ	arrS	CATAATAATTTACGGCGCAGCCAAGATTTCCCTGGTGTTGGCGCAGTATTCGCGCACCCCGGTCTAGCCGGGGTCATTTTT	GTAATCCGATTTAAATATCGAGTCTCCTTGTTTCGACTTAAGCTGGCAATTGGATTGCCAGCTTTCTTTTA	5	-22.6	No	No	Yes	Yes	No
	arrS	oxyS	AATCCGATTTAAATATCGAGTCTCCTTGTTTCGACTTAAGCTGGCAATTGGATTGCCAGCTTTCT	CCGTTTCGAGAGTTTCTCAACTCGAATAACTAAAGCCAACG	1	-13.7	No	No	No	Yes	No
	arrS	glmZ	GTAATCCGATTTAAATATCGAGTCTCCTTGTTTCGACTTAAGCTGGCAATTGGATTGCCAGCTTTCTTTTA	TCCGGAATGACGCAGAGCCGTTTACGGTGCTTATCGTCCACTGACAGATGTCGCTTATGCCTCATCAGACACCATGGACACAACGTTGAGTGAAGCACCCACTTGTTGTCATACAGACC	2	-21.8	No	No	Yes	Yes	Yes
	arrS	glmZ	AATCCGATTTAAATATCGAGTCTCCTTGTTTCGACTTAAGCTGGCAATTGGATTGCCAGCTTTCTT	TGGACACAACGTTGAGTGAAGCACCCACTTGTTGTCATA	1	-15.4	No	No	Yes	Yes	No
	arrS	sroH	GTAATCCGATTTAAATATCGAGTCTCCTTGTTTCGACTTAAGCTGGCAATTGGATTGCCAGCTTTCTTT	AATGGCGTTCTGAATACCAGAG	1	-16.8	No	No	No	No	Yes
	chiX	gcvB	AAGTGACGGCATAATAATAAAAAAATGAAATTCCTCTTTGACGGGCCAATAGCGATATTGGCCATTTTTTTA	ACTTCCTGAGCCGGAACGAAAAGTTTTATCGGAATGCGTGTTCTGGTGAACTTTTGGCTTACGGTTGTGATGTTGT	2	-25.7	No	No	Yes	Yes	Yes
	chiX	dsrA	AAAGTGACGGCATAATAATAAAAAAATGAAATTCCTCTTTGACGGGCCAATAGCGATATTGGCCATTTTTTTA	AAGTGCTTCTTGCTTAAGCAAGTTTCATCCCGACCCCCTC	3	-11.4	No	No	No	Yes	Yes
	chiX	gcvB	AAGTGACGGCATAATAATAAAAAAATGAAATTCCTCTTTGACGGGCCAATAGCGATATTGGCCATTTTTTTA	AAGCTACCTTTTTTCACTTCCTGTACATTTACCCTGTCTGTCCATAGTGATTAATGTAGCACCGCCTAATTGCGGTGCTTTTTTTT	4	-15	No	No	Yes	Yes	Yes
	chiX	sibB	AAAGTGACGGCATAATAATAAAAAAATGAAATTCCTCTTTGACGGGCCAATAGCGATATTGGCCATTTTTTTA	GAGGGTAGAGCGGGGTTTCCCCCGCCCTGGTAGTCTTAGTAAGCGGGGAAGCTTATGACTAAGA	2	-22.3	No	No	No	Yes	No
	chiX	spf	AAAGTGACGGCATAATAATAAAAAAATGAAATTCCTCTTTGACGGGCCAATAGCGATATTGGCCATTTTTTTAG	GTAGGGTACAGAGGTAAGATGTTCTATCTTTCAGACCTTTTACTTCACGTAATCGGATTTGGCTGAATATTTTAGCCGCCCCAGTCAGTAA	38	-22.5	No	No	Yes	Yes	Yes
	chiX	csrB	AAGTGACGGCATAATAATAAAAAAATGAAATTCCTCTTTGACGGGCCAATAGCGATATTGGCCATTTTTTTA	TAGTTCAGGATGAACGATTGGCCGCAAGGCCAGAGGAAAAGTTGTCAAGGATGAGCAGGGAGCAACAAAAGTAGCTGGAATGCTGCGAA	4	-31.4	No	Yes	No	Yes	Yes
	chiX	ryeA	AAAGTGACGGCATAATAATAAAAAAATGAAATTCCTCTTTGACGGGCCAATAGCGATATTGGCCATTTTTTTA	TAAAGTCAGCGAAGGAAATGCTTCTGGCTTTTAACAGATAAAAAGAGACCGAACACGATTCCTGTATTCGGTCCAGGGAAATGGCTCTTGGGAGAGAGCCGTGCGCTAAA	26	-30.8	No	No	Yes	Yes	Yes
	chiX	omrA	TAAAGTGACGGCATAATAATAAAAAAATGAAATTCCTCTTTGACGGGCCAATAGCGATATTGGCCATTTTTTTAG	TGAGATTATTCGGTACGCTCTTCGTACCCTGTCTCTTGCACCAACCTGCGCGGATGCGCAGGTTTTTTT	6	-18.9	No	No	No	Yes	Yes
	chiX	arcZ	AAGTGACGGCATAATAATAAAAAAATGAAATTCCTCTTTGACGGGCCAATAGCGATATTGGCCATTTTTTTA	ATTTCCCTGGTGTTGGCGCAGTATTCGCGCACCCCGGTCTAGCCGGGGTCATTTTT	3	-31.4	No	No	No	No	Yes
	chiX	rybB	AAGTGACGGCATAATAATAAAAAAATGAAATTCCTCTTTGACGGGCCAATAGCGATATTGGCCATTTTTT	CAGTCTTAATTAGTGCCACTGCTTTTCTTTGATGTCCCCATTTTGTGGAGCCCATCAACCCCGCCATTTCGGTTCAAGGTTGATGGGTTTTTTG	2	-20.9	No	No	No	Yes	Yes
	chiX	micF	AAGTGACGGCATAATAATAAAAAAATGAAATTCCTCTTTGACGGGCCAATAGCGATATTGGCCATTTTTTTA	ATTCATTTCTGAATGTCTGTTTACCCCTATTTCAACCGGATGCCTCGCATTCGGTTTTTTTTAC	3	-21.8	No	Yes	No	Yes	Yes
	chiX	rdlC	AAAGTGACGGCATAATAATAAAAAAATGAAATTCCTCTTTGACGGGCCAATAGCGATATTGGCCATTTTTTT	GTCTGGTTTCAAGATTAGCCCCCGTTTTGTTGTCAGGTTTTACCTCTCAACGTGCGGGGGTTTTCTCT	2	-21.4	No	No	No	Yes	No
	chiX	glmZ	AAGTGACGGCATAATAATAAAAAAATGAAATTCCTCTTTGACGGGCCAATAGCGATATTGGCCATTTTTTTA	TCGTCCACTGACAGATGTCGCTTATGCCTCATCAGACACCATGGACACAACGTTGAGTGAAGCACCCACTTGTTGTCATACAGACCTGTTTTAACGCCTGCTCCGTAA	4	-30.6	No	Yes	Yes	Yes	Yes
	chiX	micA	AAAGTGACGGCATAATAATAAAAAAATGAAATTCCTCTTTGACGGGCCAATAGCGATATTGGCCATTTTTTTA	AAGACGCGCATTTGTTATCATCATCCCTGAATTCAGAGATGAAATTTTGGCCACTCACGAGTGGCCTTTTTCTTT	6	-24.3	No	No	No	Yes	Yes
	chiX	sdsR	TAAAGTGACGGCATAATAATAAAAAAATGAAATTCCTCTTTGACGGGCCAATAGCGATATTGGCCATTTTTTTA	CAACTTTTAGCGCACGGCTCTCTCCCAAGAGCCATTTCCCTGGACCGAATACAGGAATCGTGTTCGGTCTCTTTTTA	15	-22.2	No	Yes	No	Yes	Yes
	chiX	spf	AAGTGACGGCATAATAATAAAAAAATGAAAT	AGGTAAGATGTTCTATCTTTCAGACCTTTTACTTCACGT	1	-5.2	No	No	Yes	Yes	Yes
	chiX	ryeA	AAAGTGACGGCATAATAATAAAAAAATGAAATTCCTCTTTGACGGGCCAATAGCGATATTGGCCATTTTTTTA	TTAATGCAGGCTTAGTTGCCTTGCCCTTTAAGAATAGATGACGACGCCAGGTTTTCCAG	2	-21.7	No	No	Yes	No	Yes
	chiX	csrC	AAAGTGACGGCATAATAATAAAAAAATGAAATTCCTCTTTGACGGGCCAATAGCGATATTGGCCATTTTTT	TAGAGCGAGGACGCTAACAGGAACAATGACTCAGGATGAGGGTCAGGAGCGCCAGGAGGCGAAGAC	1	-19.5	No	No	No	Yes	No
	chiX	ryhB	AAGTGACGGCATAATAATAAAAAAATGAAATTCCTCTTTGACGGGCCAATAGCGATATTGGCCATTTTTTTA	ATTGCTTCCAGTATTACTTAGCCAGCCGGGTGCTGGCTTTTTTT	1	-18.4	No	No	No	No	Yes
	chiX	oxyS	AGTGACGGCATAATAATAAAAAAATGAAATT	ACGGAGCGGCACCTCTTTTAACCCTTGAAGTCACTGCCCGTTTCG	1	-10.2	No	Yes	Yes	Yes	Yes
	chiX	gadY	AAGTGACGGCATAATAATAAAAAAATGAAATTCCTCTTT	AACAGGGAGTGTTATAACGGTTTATTAGTCTGGAGACGG	2	-13.1	No	Yes	Yes	Yes	Yes
	chiX	spf	AAATGAAATTCCTCTTTGACGGGCCAATAGCGATATTGGCCATTTTTTT	TTTTAGCCGCCCCAGTCAGTAA	1	-13	No	No	Yes	Yes	Yes
	chiX	oxyS	AAGTGACGGCATAATAATAAAAAAATGAAATTCCTCTTTGACGGGCCAATAGCGATATTGGCCATTTTTTT	CAGAAACGGAGCGGCACCTCTTTTAACCCTTGAAGTCACTGCCCGTTTCGAGAGTTTCTCAACTCGAATAACTAAAGC	4	-23.9	No	Yes	Yes	Yes	Yes
	chiX	sibB	CTCTTTGACGGGCCAATAGCGATATTGGCCATTTTTTT	GGGTAGAGCGGGGTTTCCCCCGCCCTGGTAGTCTTAGTAAGCGGG	1	-16.6	No	No	No	Yes	No
	chiX	sroH	AAGTGACGGCATAATAATAAAAAAATGAAATTC	GCGTTCTGAATACCAGAGATAATTCTCTGGCGAAACCCACCTTAAGGTGGGTTTTGTT	1	-5.1	No	No	No	Yes	No
	chiX	cyaR	GGGCCAATAGCGATATTGGCCATTTTTTT	GCTGAAAAACATAACCCATAAAATGCTAGCT	1	-8.1	No	Yes	Yes	Yes	Yes
	chiX	gcvB	AAGTGACGGCATAATAATAAAAAAATGAAATTCCTCTTTGACGGGCCAATAGCGATATTGGCCATTTTTTTA	ACTTCCTGAGCCGGAACGAAAAGTTTTATCGGAATGCGTGTTCTGGTGAACTTTTGGCTTACGGTTGTGATGTTGT	17	-25.7	No	No	Yes	Yes	Yes
	chiX	gcvB	CACCGTCGCTTAAAGTGACGGCATAATAATAAAAAAATGAAATTCCTCTTTGACGGGCCAATAGCGATATTGGCCATTTTTTTA	CTTCCTGAGCCGGAACGAAAAGTTTTATCGGAATGCGTGTTCTGGTGAACTTTTGGCTTACGGTTGTGATGTTGTGTTGTTGTGTTTGCAATTGGTCTGCGATTCAGACCATGGTAGCAAAGCTACCTTTTTTCACTTCCTGTACAT	15	-31.2	No	No	Yes	Yes	Yes
	chiX	cyaR	AAAGTGACGGCATAATAATAAAAAAATGAAATTCCTCTTTGACGGGCCAATAGCGATATTGGCCATTTTTTTA	GCTGAAAAACATAACCCATAAAATGCTAGCTGT	11	-8.9	No	Yes	Yes	Yes	Yes
	chiX	mgrR	GACGGCATAATAATAAAAAAATGAAATTCCTCTTTGACGGGCCAATAGCGATATTGGCCATTTTTTT	TAGCGTAAAAGCAAAACACAAATCTATCCATGCAAGCATTCACCGCCGGTTTACTGGCGGTTTTTT	2	-16.1	No	No	No	Yes	No
	chiX	omrB	AAAGTGACGGCATAATAATAAAAAAATGAAATTCCTCTTTGACGGGCCAATAGCGATATTGGCCATTTTTTTAG	TCCCAGAGGTATTGATAGGTGAAGTCAACTTCGGGTTGAGCAC	17	-15.6	No	No	Yes	Yes	Yes
	chiX	cyaR	AAAGTGACGGCATAATAATAAAAAAATGAAATTCCTCTTTG	CTGAAAAACATAACCCATAAAATG	1	-1.5	No	Yes	Yes	Yes	Yes
	chiX	isrC	ATAATAATAAAAAAATGAAATTCCTCTTTGACGGGCCAATAGCGATATTGGCCATTTTTTT	CGTACAGAAAGACATTCAGGGAACAACAGAACCACAATTCAGAAACTCC	1	-7.3	No	No	No	Yes	No
	csrB	gcvB	AGGAAAAGTTGTCAAGGATGAGCAGGGAGCAACAAAAGTAGCTGGAATGCTGCGAAACGAACCGGGAGCGCTG	CGGTTGTGATGTTGTGTTGTTGTGTTTGCAATTGGTCTGCGATTCAGACCATGGTAGCAAAGCTA	1	-29.8	No	No	No	Yes	No
	csrB	omrA	AGGAAGCAATAGTTCAGGATGAACGATTGGCCGCAAGGCCAGAGGAAAAGTTGTCAAGGATGAGC	GATTATTCGGTACGCTCTTCGTACCCTGTCTCTTGCACCAACCTGCGCGGATGCGCAGGTTTTTTT	1	-29.3	No	No	No	Yes	No
	csrB	spf	CAGGGAAAGGCTTCTGGATGAAGCGAAGAGGATGACGCAGGACGCGTTAAAGGACACCTCCAGGAT	AATCGGATTTGGCTGAATATTTTAGCCGCCCCAGTCAGTA	1	-19.1	No	No	No	No	Yes
	csrB	spf	AGGAAGCAATAGTTCAGGATGAACGATTGGCCGCAAGGCCAGAGGAAAAGTTGTCAAGGATGAGCAGGGAGCAACAAAAGTAGCTGGAATGCTGCGAAACGA	TTACTTCACGTAATCGGATTTGGCTGAATATTTTAGCCGCCCCAGTCAGTA	6	-23.8	No	No	No	Yes	Yes
	csrB	gadY	GAGGAAAAGTTGTCAAGGATGAGCAGGGAGCAACAAAAGTAGCTGGAATGCTGCGAAACGAACCGGGAGCGCTG	TTCCCGTGCCAACAGGGAGTGTTATAACGGTTTATTAGTCTG	1	-16.6	No	Yes	No	No	Yes
	csrB	arrS	TGACGCAGGACGCGTTAAAGGACACCTCCAGGATGGAGAATGAGAACCGGTCAGGATGATTCGGT	AATATCGAGTCTCCTTGTTTCGACTTAAGCTGGCAATTGGATTGCCAGCTTTCTTTTA	1	-27.3	No	No	No	Yes	No
	cyaR	arrS	CTGAAAAACATAACCCATAAAATGCTAGCTGTACCAGGAACCACCTCCTTAGCCTGTGTAATCTCCCTTACACGG	GTAATCCGATTTAAATATCGAGTCTCCTTGTTTCGACTTAAGCTGGCAATTGGATTGCCAGCTTTCTTTTA	8	-21.6	No	No	Yes	Yes	Yes
	cyaR	gcvB	TTCGCTGAAAAACATAACCCATAAAATGCT	ATTGCGGTGCTTTTTTTT	2	-5.2	No	No	Yes	Yes	No
	cyaR	glmZ	CTGAAAAACATAACCCATAAAATGCTA	ATGTTCGCCTTAGTGCCTCATAAACTCCGGAATGACG	1	-2.8	No	No	No	No	Yes
	cyaR	omrA	CTGAAAAACATAACCCATAAAATGCTAGCT	ATTATTCGGTACGCTCTTCGTACCCTGTCTCTTGCACCAACCTGCGCGGATGCGCAGGTTTTTTT	2	-6.5	No	No	No	Yes	Yes
	cyaR	omrB	GCTGAAAAACATAACCCATAAAATGC	CCCAGAGGTATTGATAGGTGAAGTCAACTTCGGGTTGAGCAC	3	-9.6	No	No	No	Yes	No
	cyaR	gcvB	GCTGAAAAACATAACCCATAAAATGCTAGCTGTACCAGGAACCACCTCCTTAGCCTGTGTAATCTCCCTTACACGGGCTTATTTT	CTTCCTGAGCCGGAACGAAAAGTTTTATCGGAATGCGTGTTCTGGTGAACTTTTGGCTTACGGTTGTGATGTTGTGTTGTTGTGTTTGCAATTGGTCTGCGATTCAGACCATGGTAGCAAAGCTACCTT	12	-43.1	No	No	Yes	Yes	Yes
	cyaR	spf	GCTGAAAAACATAACCCATAAAATGCTAGCTGTACCAGGAACCA	CGTAGGGTACAGAGGTAAGATGTTCTATCTTTCAGACCTTTTACTTCACGTAATCGGATTTGGCTGAATATTTTAGCCGCCCCAGTCAGTAATGACTGGGGCGTTTTTT	12	-19.1	No	No	Yes	Yes	Yes
	cyaR	gcvB	CGCTGAAAAACATAACCCATAAAATGCTAGCTGT	TGTGATGTTGTGTTGTTGTGTTTGCAATTGGTCTGCGATTCAGACCATGGTAGCAAAGCTACCTTTTTTCACTTCCTGTACATTTACCCTGTCTGTCCATAGTGATTAATGTAGCACCGCCT	11	-13.4	No	No	Yes	Yes	Yes
	cyaR	oxyS	GCTGAAAAACATAACCCATAAAATGCT	CTCGAATAACTAAAGCCAAC	1	-2.8	No	No	No	No	Yes
	cyaR	arcZ	GCTGAAAAACATAACCCATAAAATGCTAGCTGTACCAGGAACCAC	TTCCCTGGTGTTGGCGCAGT	2	-17.8	Yes	No	No	Yes	No
	cyaR	spf	GCTGAAAAACATAACCCATAAAATGCTAGC	ATCGGATTTGGCTGAATATTTTAGCCGCCCCAGTCAGTAA	4	-9.3	No	No	Yes	Yes	No
	cyaR	gadY	GCTGAAAAACATAACCCATAAAATGCTAGCT	ACTGAGAGCACAAAGTTTCCCGTGCCAACAGGGAGTGTTATAACGGTTTATTAGTCTGGAGACGG	14	-10.6	No	No	Yes	Yes	Yes
	cyaR	sroH	CTGAAAAACATAACCCATAAAATGC	ACATCCCGCAACCTGCGATTATCGCAAGGTCAAGGCAAAGTCCG	1	-2.6	No	No	No	Yes	No
	dicF	gcvB	TTCTGGTGACGTTTGGCGGTATCAGTTT	TGTGTTGTTGTGTTTGCAATTGGTCTGCGATTCAGACCATGGTAGCAAAGC	1	-16.1	No	No	No	No	Yes
	dicF	ryjB	TTTACTCCGTGACTGCTCTGCCGCCCTTTTT	ACTTTTGACGAAGGCGGCAGGGATCGCAGAAGGGTTATTGCTCTTT	2	-26.2	No	No	No	No	Yes
	dsrA	micF	TTTTTAAGTGCTTCTTGCTTAAGCAAGTTTCATC	TTTCTGAATGTCTGTTTACCCCTATTTCAACCGGATGCCTCGCATTCGGTTTTTTTTAC	1	-6.9	No	No	No	No	Yes
	dsrA	omrB	TTTAAGTGCTTCTTGCTTAAGCAAGTTTCATCCCGACCCCCTC	CCCAGAGGTATTGATAGGTGAAGTCAACTTCGGGTTGAG	3	-13.5	No	No	No	Yes	Yes
	dsrA	gcvB	CTTCTTGCTTAAGCAAGTTTCATCCCGACCCCCT	CTTCCTGAGCCGGAACGAAAAGTTTTATCGGAATGCGTGTTCTGGTGAACTTTTGGCTTAC	1	-12.9	No	No	Yes	No	No
	dsrA	omrA	ATTTTTTAAGTGCTTCTTGCTTAAGCAAGTTTCATCCCGACCCCCTCAGGGTCGGGATTTTTT	CGGTACGCTCTTCGTACCCTGTCTCTTGCACCAACCTGCGCGGATGCGCAGGTTTTTTT	1	-25.3	No	No	No	Yes	No
	dsrA	gadY	AACGAATTTTTTAAGTGCTTCTTGCTTAAGCAAGTTTCATCCCGACCC	GTGTTATAACGGTTTATTAGTCTGGAGACGGCAGACTATCCTCTTCCCGGTCCCCTATGCCGGGTTTTTTTTAT	1	-10.3	No	No	No	No	Yes
	dsrA	cyaR	CTGGTGTAACGAATTTTTTAAGTGCTTCTTGCTTAAGCAAGTTTCATCCCGACCCCCT	GCTGAAAAACATAACCCATAAAATGCTAGCTGT	2	-7.4	No	No	No	Yes	Yes
	dsrA	sibD	AGATTTCCTGGTGTAACGAATTTTTTAAGTGCTTCTTGCTTAAGCAAGTTTCATCCCGACCCC	TAACCCTTTCCTTCTGTAAGGCCCCCTTCTTCGGGAGGGGCTTTCCCG	1	-16.3	No	No	No	Yes	No
	dsrA	gcvB	TGTAACGAATTTTTTAAGTGCTTCTTGC	TGTGTTGTTGTGTTTGCAATTGGTCTGCGAT	1	-6.2	No	No	No	No	Yes
	dsrA	spf	AAGTTTCATCCCGACCCC	GGGTACAGAGGTAAGATGTTCTATCTTTCAGACCTTTTACTTCACGTA	1	-7.4	No	No	Yes	No	No
	dsrA	arcZ	ACGAATTTTTTAAGTGCTTCTTGCT	CCCTGGTGTTGGCGCAGT	1	-7.6	No	No	Yes	No	No
	dsrA	omrB	AAGCAAGTTTCATCCCGACCCCC	AGAGGTATTGATAGGTGAAGTCAACTTCGGGTTGAG	1	-11.7	No	No	No	Yes	Yes
	dsrA	arrS	AAGCAAGTTTCATCCCGACCCCC	ATCGAGTCTCCTTGTTTCGACTTAAGCTGGCAATTGGATTGCCAGCTTT	2	-8	No	No	Yes	Yes	Yes
	dsrA	spf	ATTTTTTAAGTGCTTCTTGCT	CGTAATCGGATTTGGCTGAATATTTTAGCCGCCCCAGTCA	1	-4.7	No	No	No	Yes	No
	ffs	spf	AGGTCAGGTCCGGAAGGAAGCAGCCAAGGCAGATGACGCGTGTGCCGGGATGTAGCTG	TAGGGTACAGAGGTAAGATGTTCTATCTTTCAGACCTTTTACTTCACGTA	1	-26	No	No	Yes	No	No
	ffs	chiX	AGGTCCGGAAGGAAGCAGCCAAGGCAGATGACGCGTGTGCCGGGATGTAGCTGGCAGGG	AAGTGACGGCATAATAATAAAAAAATGAAATTCCTCTTTGACGGGCCAATAGCGATATTGGCCATTTTTTTA	5	-24.2	No	No	Yes	No	Yes
	ffs	sroH	CGCGTGTGCCGGGATGTAG	AGACTGAAGAAATTCAGACATCCCGCAACCTGCGATTATCGCAA	11	-21.2	No	No	No	Yes	Yes
	gadY	spf	ACAGGGAGTGTTATAACGGTTTATTAGTCTGGAGACGG	GAGGTAAGATGTTCTATCTTTCAGA	1	-7	No	Yes	Yes	Yes	No
	gadY	spf	CTGAGAGCACAAAGTTTCCCGTG	ATCGGATTTGGCTGAATATTTTAGCCGCCCCAGTCAGT	1	-8.2	No	Yes	No	No	Yes
	gadY	glmZ	ACAGGGAGTGTTATAACGGTTTATTAGTCTGGAGACGGCAGACTATCCTCTTCCCGGTC	ACCATGGACACAACGTTGAGTGAAGCACCCACTTGTTGTCA	2	-16.1	No	No	No	Yes	Yes
	gadY	glmZ	GTTTATTAGTCTGGAGACG	GCCTTAGTGCCTCATAAACTCCGGAATGACGCAGAGCCG	1	-11.6	No	No	Yes	No	No
	gadY	spf	AACGGTTTATTAGTCTGGAGACGGCAGACTATCCTCTTCCCGGTCCCCTATGCCGGGTTTTTTTTATGTCTGAGTAAAACTCTATAATCTTATTCCT	GTAGGGTACAGAGGTAAGATGTTCTATCTTTCAGACCTTTTACTTCACGTAATCGGATTTGGCTGAATATTTTAGCCGCCCCAGTCAGT	10	-40.2	No	Yes	Yes	Yes	Yes
	gadY	sroH	TTTCCCGTGCCAACAGGGAGTGTTATAACGGTTTATTAGT	TGCAGCAGACTGAAGAAATTCAGACATCCCGCAACCTGCGATTATCG	1	-13.9	No	No	No	Yes	No
	gadY	spf	AACGGTTTATTAGTCTGGAGACGGCAGACTATCCTCTTCCCGGTCCCCTATGCCGGGTTTTTTTTA	TAGGGTACAGAGGTAAGATGTTCTATCTTTCAGACCTTTTACTTCACGTAATCGGATTTGGCTGAATATTTTAGCCGCCCCAGTCAGT	2	-26.7	No	Yes	Yes	Yes	Yes
	gcvB	spf	ACTTCCTGAGCCGGAACGAAAAGTTTTATCGGAATGCGTGTTCTGGTGAACTTTTGGCTTACGGTTGTGATGTTGTGTTGTTGTGTTTGCAATTGGTCTGCGATTCAGACCATGGTAGCAAAGCTACCTTTTTTCACTTCCTGTACATTTACCCTGTCTGTCCATAGTGATTAATGTAGCACCGCCTAATTGCGGTGCTTTTTTTT	CGTAGGGTACAGAGGTAAGATGTTCTATCTTTCAGACCTTTTACTTCACGTAATCGGATTTGGCTGAATATTTTAGCCGCCCCAGTCAGTAA	59	-45.3	No	No	Yes	Yes	Yes
	gcvB	omrA	CTTCCTGAGCCGGAACGAAAAGTTTTATCGGAATGCGTGTTCTGGTGAACTTTTGGCTTACGGTTGTGATGTTGTGTTGTTGTGTTTGCAATTGGTCTGCGATTCAGACCATGGTAGCAAAGCTACCTTTTTTCAC	GATTATTCGGTACGCTCTTCGTACCCTGTCTCTTGCACCAACCTGCGCGGATGCGCAGGTTTTTTTTC	4	-34.1	No	No	Yes	Yes	No
	gcvB	sroH	ATGTTGTGTTGTTGTGTTTGCAATTGGTCTGCGATTCAGACCATGGTAGCAAAGCTACCTTTTTTCACTTCC	AGCAGACTGAAGAAATTCAGACATCCCGCAACCTGCGATTATCGCAAGGTCAAGGC	1	-25.1	No	No	Yes	No	No
	gcvB	gadY	CTTCCTGAGCCGGAACGAAAAGTTTTATCGGAATGCGTGTTCTGGTGAACTTTTG	GTGCCAACAGGGAGTGTTATAACGGTTTATTAGTCTGGAGACGGCAGACTATCCTCTTCCCGGTCCCCTATGCCGGGTTTTTTTT	3	-24.4	No	No	Yes	Yes	No
	gcvB	omrA	CACTTCCTGAGCCGGAACGAAAAGT	CCAGAGGTATTGATTGGTGAGATTATTCGGTACGCTCTTCGTACCCTGTCTCTTGCA	1	-12	No	No	No	Yes	No
	gcvB	omrB	AAGTTTTATCGGAATGCGTGTTCTGGTGAACTTTTGGCT	CCCAGAGGTATTGATAGGTGAAGTCAACTTCGGGTTGAGC	1	-16.8	No	No	No	Yes	Yes
	gcvB	spf	TATCGGAATGCGTGTTCTGGTGAACTTTTGGCTTACGG	TTTTAGCCGCCCCAGTCAGTAA	1	-10.8	No	No	No	Yes	Yes
	gcvB	spf	ACTTCCTGAGCCGGAACGAAAAGTTTTATCGGAATGCGTGTTCTGGTGAACTTTTGGCTTACGGTTGTG	GTAAGATGTTCTATCTTTCAGACCTTTTACTTCACGTAAT	2	-13.7	No	No	Yes	Yes	Yes
	gcvB	sroH	TTTGCAATTGGTCTGCGATTCAGAC	GGCGTTCTGAATACCAGAGATAATTCTCTGGCGAAACCCACCTTAAGGTGGGTTTTGTT	1	-16.3	No	No	No	Yes	No
	gcvB	ryhB	CCCTGTCTGTCCATAGTGATTAATGTAGCACCGCCTAATTGCGGTGCTTTTTTTT	TGAAAGCACGACATTGCTCACATTGCTTCCAGTATTACTTAGCCAGCCGGGTGCTGGCTTTTT	1	-27.7	No	No	No	No	Yes
	gcvB	csrC	TTACCCTGTCTGTCCATAGTGATTAATGTAGCACCGCCTAATTGCGGTGCTTTTTTTT	AGAGCGAGGACGCTAACAGGAACAATGACTCAGGATGAGGGTCAGGAGCGCCAGGAGGCGAAGACAG	1	-24.5	No	No	No	Yes	No
	gcvB	spf	TGCAATTGGTCTGCGATTCAGACCATGGT	TTTTAGCCGCCCCAGTCAGT	1	-8.5	No	No	Yes	Yes	No
	gcvB	sroH	CTTCCTGAGCCGGAACGAAAAGTTTTATCGGAATGCGTGTTCTGGTGAACTTTTGGCTTACGGT	GTCCGGTAATGGCGTTCTGAATACCAGAGATAATTCTCTGGCGAAACCCACCTTAAGGTGGGTTTTGTT	1	-29.7	No	No	No	Yes	No
	gcvB	spf	ATTGGTCTGCGATTCAGACCATGGTA	CGTAATCGGATTTGGCTG	1	-7.1	No	No	Yes	Yes	No
	gcvB	gadY	ATTGGTCTGCGATTCAGACCATGGTAGC	CCGTGCCAACAGGGAGTGTTATAACGGTTTATTAGTCTGGAGACGG	1	-16.2	No	No	Yes	No	No
	gcvB	spf	TTTGCAATTGGTCTGCGATTCAG	GTACAGAGGTAAGATGTTCTATCTTTCAGACCTTTTA	1	-10.4	No	No	Yes	Yes	No
	gcvB	arrS	ACTTCCTGAGCCGGAACGAAAAGTTTTA	GTAATCCGATTTAAATATCGAGTCTCCTTGTTTCGACTTAAGCTGGCAATTGGATTGCCAGCTTTCTTTTA	5	-12.5	No	No	Yes	Yes	No
	gcvB	spf	ATTGCGGTGCTTTTTTTT	GACCTTTTACTTCACGTAATCGGATTTGGCTGAATATTTTAGCCGCCCCAGTCAGT	1	-8.3	No	No	Yes	Yes	No
	gcvB	gadY	ACTTCCTGAGCCGGAACGAAAAGTTTTATCGGAATGCGTGTTCTGGTGAACTTTTGGCTTACGGTTGTGATGTTGTGTTGTTGTG	AACAGGGAGTGTTATAACGGTTTATTAGTCTGGAGACGGCAGACTATCCTCTTCCCGGTCCCCTATGCCGGGTTTTTTTTATGT	3	-33.8	No	No	Yes	Yes	No
	gcvB	omrA	CTGTACATTTACCCTGTCTGTCCATAGTGATTAATGTAGCACCGCCTAATTGCGGTGCTTTTTTTTA	ATTATTCGGTACGCTCTTCGTACCCTGTCTCTTGCACCAACCTGCGCGGATGCGCAGGTTTTTTTTC	3	-22.4	No	No	No	Yes	No
	gcvB	omrB	ACGAAAAGTTTTATCGGAATGCGTGTTCTGGTGAACTTTTGGCTTACGGTTGTGATGTTGTGTTGTTGTGTTTGCAATTGGTCTGCGATTCAGACCATGGTAGCAAAGCTACCTTTTTTCACTTCC	TCCCAGAGGTATTGATAGGTGAAGTCA	5	-15.4	No	No	No	Yes	Yes
	glmY	gadY	AAGGTGCCTGCCGTCCAACTT	CTGGAGACGGCAGACTATCCTCTTCCCGGTCCCCTATGCCGGGTTTTTTTTA	3	-17.6	No	Yes	No	No	Yes
	glmZ	sroH	CCATGGACACAACGTTGAGT	AATTCTCTGGCGAAACCCACCTTAAGGTGGGTTTTGTT	1	-8.1	No	No	Yes	No	No
	glmZ	spf	TGGACACAACGTTGAGTGAAGCACCCACTTGTTGTCATACAGACCTGTTTTAACGCCTGCTCCGTA	TAGGGTACAGAGGTAAGATGTTCTATCTTTCAGACCTTTTACTTCACGTAATCGGATTTGGCTGAATATTTTAGCCGCCCCAGTCAGT	2	-20.6	No	No	Yes	Yes	No
	glmZ	spf	TTCCATCTCTTATGTTCGCCTTAGTGCCTCATAAA	TTCAGACCTTTTACTTCACGTAATCGGATTTGGCTGAAT	1	-8.7	No	No	Yes	No	No
	mgrR	spf	GATTCGTTATCAGTGCAGGAAAATGCCT	TTTTAGCCGCCCCAGTCAGTAATGACTGG	1	-7.3	No	No	Yes	No	No
	mgrR	spf	TATCCATGCAAGCATTCACCGCCGGTTTACTGGCGGTTTTTTTTCGCCGTCATAAAAATCAGGCCCCTTGTACACA	GGGTACAGAGGTAAGATGTTCTATCTTTCAGACCTTTTACTTCAC	2	-13.5	No	No	Yes	Yes	No
	mgrR	ryeA	TATCCATGCAAGCATTCACCGCCGGTTTACTGGCGGTT	TAAAAGTTGGCATTAATGCAGGCT	1	-13.7	No	No	No	No	Yes
	mgrR	gcvB	GATTCGTTATCAGTGCAGGAAAATGCCTGTTAGCGTAAAAGCAAAACACAAATCTATCCAT	TTGTGTTGTTGTGTTTGCAATTGGTCTGCGATTCAGACCATGGTAGCAAAGCTACCTTTTTTCACTTCCTGTA	1	-24.1	Yes	No	No	Yes	No
	mgrR	gcvB	AAAACACAAATCTATCCATGCAAGCATTCACCGCCGGTTTACTGGCGGTTTTTTT	CTTCCTGAGCCGGAACGAAAAGTTTTATCGGAATGCGTGTTCTGGTGAACTTTTGGCTTACGGTTGTGAT	2	-25.6	Yes	No	No	Yes	No
	mgrR	micA	GATTCGTTATCAGTGCAGGAAAATGCCTGTTAGCGTAAAAGCAAAACACAAATCTATCCATG	TTTGTTATCATCATCCCTGAATTCAGAGATGAAATTTTGGCCACTCACGAGTGGCCTTTTTCTT	1	-14.9	No	No	No	Yes	No
	mgrR	gadY	CGATTCGTTATCAGTGCAGGAAAATGCCTGTTAGCGTAAA	GTGTTATAACGGTTTATTAGTCTGGAGACG	1	-11.2	No	Yes	No	Yes	No
	mgrR	spf	TGTTAGCGTAAAAGCAAAACACAAATCTATCCATGCAAGCATTCACCGCCGGTTTACTGGCGGTTTTTTT	GGGTACAGAGGTAAGATGTTCTATCTTTCAGACCTTTTACTTCACG	2	-11.9	No	No	Yes	Yes	Yes
	mgrR	spf	GATTCGTTATCAGTGCAGGAAAATGCCTGTTAGCGTAAAAGCAAAACACAAATCTATCCATGCAAGCATTCACCGCCGGTTTACTGGCGGTTTTTTT	AGGGTACAGAGGTAAGATGTTCTATCTTTCAGACCTTTTACTTCACGT	1	-15.9	No	No	Yes	Yes	Yes
	mgrR	dsrA	TTATCAGTGCAGGAAAATGCCTGTTAGCGTAAAAGC	ACATCAGATTTCCTGGTGTAACGAATTTTTTA	1	-9.4	No	No	Yes	No	No
	mgrR	cyaR	CGATTCGTTATCAGTGCAGGAAAATGCCTGTTAGCGTAAAAGCAAAACACAAATCTATCCATGCAAGCATTCACCGCCGGTTTACTGGCGGTTTTTTT	GCTGAAAAACATAACCCATAAAATGCTAGCTGTAC	10	-13.2	No	No	No	Yes	No
	mgrR	arrS	GAAAATGCCTGTTAGCGTAAAAGCAAAACACAAATCTATCCATGCAAGCATTCACCGC	GTAATCCGATTTAAATATCGAGTCTCCTTGTTTCGACTTAAGCTGGCAATTGGATTGCCAGCTTTCTTTT	2	-14.4	No	No	No	Yes	No
	mgrR	omrA	TCCATGCAAGCATTCACCGCCGGTTTACTGGCGGTTTTTT	ATTATTCGGTACGCTCTTCGTACCCTGTCTCTTGCACCAACCTGCGCGGATGCGCAGGTTTTTTT	1	-22.3	No	Yes	Yes	No	No
	mgrR	ryeA	CGTTATCAGTGCAGGAAAATGCCTGTTAGCGTAAAAGCAAAAC	ACAGATAAAAAGAGACCGAACACG	1	-4.5	No	No	No	No	Yes
	micA	gadY	TTTGTTATCATCATCCCTGAATTCAGAGATGAAATTTTGGCCACTC	CCAACAGGGAGTGTTATAACGGTTTATTAGTCTGGAGACGGCAGACTATCCTCTTCCCGGTCCC	1	-16.3	No	No	No	No	Yes
	micA	gcvB	GACGCGCATTTGTTATCATCATCCCTGAATTCAGAGATGAAATTTTGGCCACTCACGAGTGGCCTTTTTCTT	TTTGCAATTGGTCTGCGATTCAGACCATGGTAGCAAAGCTACCTTTTTTCACTTCCTGTACATTTACCCTGTCTGTCCATAGTGATTAATGTAGCACCGCCTAATTGCGGTGCTTTTTTTTAC	3	-24.7	No	No	Yes	Yes	No
	micF	gcvB	ATTCATTTCTGAATGTCTGTTTACCCCTATTTCAACCGGATGCCTCGCATTCGGTTTTTTTTAC	GGTTGTGATGTTGTGTTGTTGTGTTTGCAATTGGTCTGCGATTCAGACCATGGTAGCAAAGCTACCTTTTTT	1	-19.5	No	No	No	Yes	No
	micF	arrS	ATTTCTGAATGTCTGTTTACCCCTATTTCAACCGGATGCCTCGCATTCGGTTTTTTTTAC	GTAATCCGATTTAAATATCGAGTCTCCTTGTTTCGACTTAAGCTGGCAATTGGATTGCCAGCTTTCTTTTA	5	-20.1	No	No	No	Yes	Yes
	micF	omrB	TATTACCGTCATTCATTTCTGAATGTCTGTTTACCCCTATTTCAACCGGATGCCTCGCATTCGGTTTTTTTTAC	CAGAGGTATTGATAGGTGAAGT	2	-15.5	No	No	No	Yes	Yes
	omrA	gadY	CGGTACGCTCTTCGTACCCTGTCTCTTGCACCAACCTGCGCGGATGCGCAGGTTTTTTTTC	TGAGAGCACAAAGTTTCCCGTGCCAACAGGGAGTGTTATAACGGTTT	1	-23.5	No	No	No	Yes	No
	omrA	spf	CCCAGAGGTATTGATTGGTGAGATTATTCGGTACGCTCTTCGTACCCTGTCTCTTGCACCAACCTGCGCGGATGCGCAGGTTTTTTTTC	CGTAGGGTACAGAGGTAAGATGTTCTATCTTTCAGACCTTTTACTTCACGTAATCGGATTTGGCTGAATATTTTAGCCGCCCCAGTCAGTA	11	-33.2	No	No	Yes	Yes	Yes
	omrB	spf	CCCAGAGGTATTGATAGGTGAAGTCAACTTCGGGTTGAGC	CAGAGGTAAGATGTTCTATCTTTCAGACCTTTTACTTCACGTAATCGGATTTGGCTGAATATTTTAGCCGCCCCAGTCAGTAATGACTGGGGCGTTTTT	11	-28.3	No	No	Yes	Yes	Yes
	omrB	spf	GTGATCCCAGAGGTATTGATAGGTGAAGTCAACTTCGGGTTGA	GAGGTAAGATGTTCTATCTTTCAGACCTTTTACTTCACGT	2	-25	No	No	Yes	Yes	Yes
	omrB	gadY	CCCAGAGGTATTGATAGGTGAAGTCAACTTCGGGTTGA	GGGAGTGTTATAACGGTTTATTAGTCTGGAGACGGCAGACTATCCTCTTCCCGGTCCCCTATGCCGGGTTTTTTT	1	-21.2	No	No	No	Yes	Yes
	omrB	arrS	GAGGTATTGATAGGTGAAGTCAACTTCGGGTTGAGC	AATATCGAGTCTCCTTGTTTCGACTTAAGCTGGCAATT	1	-13.2	No	No	Yes	Yes	Yes
	omrB	gadY	CCCAGAGGTATTGATAGGTGAAGTCAACTTCGGGTTGA	GGGAGTGTTATAACGGTTTATTAGTCTGGAGACGGCAGACTAT	2	-14.1	No	No	No	Yes	Yes
	omrB	glmZ	CCCAGAGGTATTGATAGGTGAAGTCAAC	AACGTTGAGTGAAGCACCCACTTGTTGTCATACAGACCTGTTTTAACGCCTGCTCCGT	1	-14.6	No	No	Yes	No	No
	oxyS	sroH	AACCCTTGAAGTCACTGCCCGTTTCGAGA	AGGCAAAGTCCGGTAATGGCGTTC	1	-9.6	No	No	No	Yes	No
	rdlA	gcvB	TTCAAGATTAGCCCCCGTTCTGTT	GGCTTACGGTTGTGATGTTGTGTTGTTGTGTTTGCAATTGGTCTGCGATTCAGACCATGGTAGCAAA	1	-9.4	No	No	No	No	Yes
	rdlA	arrS	TCTGGTTCAAGATTAGCCCCCGTTCTGTTGTCAGGTT	TCCGATTTAAATATCGAGTCTCCTTGTTTCGACTTAAGCTGGCAATTGGATTGCCAGCTTTCTTTT	1	-18.1	No	No	No	Yes	No
	rdlA	arcZ	TCTCAACGTGCGGGGGTTTTCTCTTTCCAGCAACCAATGCCACCAGGGATAAAGCCC	TTTCCCTGGTGTTGGCGCAGTATTCGCGCACCCCGGTCTA	8	-32	No	No	Yes	Yes	No
	rdlA	rdlC	TTAGCCCCCGTTCTGTTG	CTCAACGTGCGGGGGTTTTCTCTTT	10	-20.8	No	No	Yes	Yes	Yes
	rdlA	ryhB	TCAGGTTGTACCTCTCAACGTGCGGGGGTTTTCTC	GCGATCAGGAAGACCCTCGCGGAGAACCTGAAAG	5	-32.8	No	No	No	No	Yes
	rdlA	rdlB	TTAGCCCCCGTTCTGTTG	CTCAACGTGCGGGGGTTTTCTCTTT	6	-20.8	No	Yes	Yes	Yes	Yes
	rdlA	rdlC	TTCTGGTTCAAGATTAGCCCCCGTTCTGTTGTCAGGTTG	TACCTCTCAACGTGCGGGGGTTTTCTCTTTCCA	6	-31.3	No	No	Yes	Yes	Yes
	rdlA	rdlD	TTCTGGTTCAAGATTAGCCCCCGTTCTGTTGTCA	CAACGTGCGGGGGTTTTCTC	8	-23	No	No	Yes	Yes	Yes
	rdlB	arrS	TCTGGTTTCAAGATTAGCCCCCGTTCTGTTGTCAGGTTTTACCTCTCAACGTGCGGGGGTTTTCTCT	TCCGATTTAAATATCGAGTCTCCTTGTTTCGACTTAAGCTGGCAATTGGATTGCCAGCTTTCTTTTA	2	-26.3	No	No	No	Yes	No
	rdlB	arcZ	TCTCAACGTGCGGGGGTTTTCTCTTTCCAGCAACCAATGCCACCAGGGATAAAGC	TTTCCCTGGTGTTGGCGCAGTATTCGCGCACCCCGGTCTAGCC	13	-32	No	Yes	Yes	Yes	Yes
	rdlC	gcvB	GTTTCAAGATTAGCCCCCGTTTTGTTGTCAGGTTTTACCTCTCAACGTGCGGGGGTTTTCTCT	CGGTTGTGATGTTGTGTTGTTGTGTTTGCAATTGGTCTGCGATT	1	-14.4	No	No	Yes	No	No
	rdlC	arcZ	TCTCAACGTGCGGGGGTTTTCTCTTTCCAGCAACCAATGCCACCAGGGATAAAGCCC	TTTCCCTGGTGTTGGCGCAGTATTCGCGCACCCCGGTCTAGCC	11	-32	No	No	Yes	Yes	Yes
	rdlC	ryeA	TTTCAAGATTAGCCCCCGTTTTGTTGTCAGGTTTTACCTCTCAACGTGCGGGGGTTTTCTCTT	AAGTCAGCGAAGGAAATGCTTCTGGCTTTTAACAGATAAAAAGAGACCGAACACGATTCCTGTA	1	-19	No	No	No	Yes	No
	rdlD	spf	AGCCCCCGTGGTGTTGTCAGGTGCATACCTGCAACGTGCGGGGGTTTTCTCTC	GAGGTAAGATGTTCTATCT	1	-8.3	No	No	No	No	Yes
	rprA	omrB	TTGCTGTGTGTAGTCTTTGCCCATCTCCCACGATGGGCTTTTTTTT	CCCAGAGGTATTGATAGGTGAAG	2	-16.5	No	No	Yes	No	No
	rybB	rdlB	CATTTTGTGGAGCCCATCAAC	GTTTCAAGATTAGCCCCCGTTCTGTTGTCAGGTTTTACCTCTCAACGTGCGGGGGTTTTCTC	1	-11.9	No	No	No	No	Yes
	rybB	glmZ	CCATTTCGGTTCAAGGTTGATGGGTTTTTTG	AGACCTGTTTTAACGCCTGCTCCGT	3	-14.1	No	No	No	Yes	No
	rybB	spf	CTTTGATGTCCCCATTTTGTGGAGCCCATCAACCCCGCCATTTCGGTTCAAGGTTGATGGGTTTTTTG	GTAGGGTACAGAGGTAAGATGTTCTATCTTTCAGACCTTTTACTTCACGT	2	-14	No	No	No	Yes	Yes
	rybB	micA	CTTTGATGTCCCCATTTTGTGGAGCCCATCAACCCCGCCATTTCGGTTCAAGGTTGATGGGTTTTTTG	AATTCAGAGATGAAATTTTGGCCACTCACGAGTGGCCTTTTTCTTTTCTG	1	-15.8	No	No	No	No	Yes
	rybB	ryeA	CTTTTCTTTGATGTCCCCATTTTGTGGAGCCCATCAACCCCGCCATTTCGGTTCAAGGTTGATGGGTTTTTTG	GCTTCTGGCTTTTAACAGATAAAAAGAGACCGAACACGATTCCTGTATTCGGTCCAGGGAAATGGCTCTTGGGAGAGAG	2	-32.1	No	No	No	Yes	Yes
	rybB	gcvB	TTTTGTGGAGCCCATCAACCCCGCCATTTCGGTTCAAGGTTGATGGGTTTTTTG	TGTGTTGTTGTGTTTGCAATTGGTCTGCGATTCAGACCATGGTAGCAAAGCTAC	1	-13.7	No	No	No	No	Yes
	rybB	arrS	ATTTCGGTTCAAGGTTGATGGGTTTTTTG	GTAATCCGATTTAAATATCGAGTCTCCTTGTTTCGACTTAAGCTGGCAATTGGATTGCCAGCTTTCTTTT	1	-13.3	No	No	No	No	Yes
	rybB	spf	TTTCTTTGATGTCCCCATTTTGTGGAGCCCATCAACCCCGCCATTTCGGTTCAAGGTTGATGGGTTTTTTG	TTTTAGCCGCCCCAGTCAG	1	-8.2	No	No	Yes	No	No
	rybB	arrS	GCCACTGCTTTTCTTTGATGTCCCCATTTTGTGGAGCCCATCAACCCCGC	GTAATCCGATTTAAATATCGAGTCTCCTTGTTTCGACTTAAGCTGGCAATTGGATTGCCAGCTTTCTTTT	3	-14.2	No	No	No	Yes	Yes
	rydC	arrS	TTCCGATGTAGACCCGTATTCTTCGCCTGTACCACGGGTCGGTTTTAGTACAGGCGTTTTCTTT	GTAATCCGATTTAAATATCGAGTCTCCTTGTTTCGACTTAAGCTGGCAATTGGATTGCCAGCTTTCTTTTA	2	-21.7	No	No	No	Yes	Yes
	rydC	omrB	CTTCCGATGTAGACCCGTATTCTTCGCCTGTACC	CCAGAGGTATTGATAGGTGAAGTCAACTTCGGGTTGAGC	41	-23.7	No	No	No	Yes	Yes
	rydC	gadY	TTTAGTACAGGCGTTTTCTTT	AGTGTTATAACGGTTTATTAGTCTGGAGACGGCAGACTATCCTCTTCCCGGTCCCCTATGCCGGGTTTTTTTT	1	-12.3	No	No	Yes	No	No
	ryeA	omrB	CTTCTGGCTTTTAACAGATAAAAAGAGACCGAACACGATTCCTGTATTCGGTCCAGGGAAATGGCTCTTGGGAGAGAGCCGTGCGCT	TCCCAGAGGTATTGATAGGTGAAGTCAACTTCGGGTTGAG	9	-23.6	No	No	Yes	Yes	Yes
	ryeA	micF	ATAAAGTCAGCGAAGGAAATGCTTCTGGCTTTTAACAGATAAAAAGAGACCGAACACGATTCCTGTATTCGGTCCAGGGAAATGGCTCTTGGG	ATTTCTGAATGTCTGTTTACCCCTATTTCAACCGGATGCCTCGCATTCGGTTTTTTTTAC	3	-35.2	No	No	No	Yes	Yes
	ryeA	arrS	TAAAAAGCGTGGTGGTCATCAGCTGAAATGTTAAAAACCGCCCGTTCTGG	AAATATCGAGTCTCCTTGTTTCGACTTAAGCTGGCAATTGGATTGCCAGCTTTCT	1	-21	No	No	No	Yes	No
	ryeA	spf	GTGTGTGTTATGGTTGACTATAAAGTCAGCGAAGGAAATGCTTCTGGCTTTTAACAGATAAAAAGAGACCGAACACGATTCCTGTATTCGGTCCAGGGAAATGGCTCTTGGGAGAGAGCCGTGCGCTAA	GTAGGGTACAGAGGTAAGATGTTCTATCTTTCAGACCTTTTACTTCACGTAATCGGATTTGGCTGAATATTTTAGCCGCCCCAGTCAGTAATGACTGGGGCGTTTTT	31	-47.4	No	No	Yes	Yes	Yes
	ryeA	ryjB	GAAGGAAATGCTTCTGGCTTTTAACAGATAAAAAGAGACCGAACACGATTCCTGTATTCGGTCCAGGGAAATGGCTCTTGGG	GAAGGCGGCAGGGATCGCAGAAGGGTTATTGCTCTTTGCCGGGGATAAGCGCTCTGCTTATCCCCATCTTATCG	2	-32.7	No	No	No	Yes	Yes
	ryeA	csrB	AAGTCAGCGAAGGAAATGCTTCTGGCTTTTAACAGATAAAAAGAGACCGAACACGATTCCTGTATTCGGTCCAGGGAAATGGCTCTTGGGAGAGAGCCGTGCGCT	AGGAAGCAATAGTTCAGGATGAACGATTGGCCGCAAGGCCAGAGGAAAAGTTGTCAAGGATGAGCAGGGAGCAACAAAAGTAGCTGGAATGCTGCGAA	3	-40.4	No	No	No	Yes	No
	ryeA	gcvB	TGCAAAATGGTCAATAAAAAGCGTGGTGGTCATCAGCTGAAATGTTAAAAACCGCCCGTTCTGG	ACTTCCTGAGCCGGAACGAAAAGTTTTATCGGAATGCGTGTTCTGGTGAACTTTTGGCTTACGGTTGTG	1	-28.1	No	No	No	Yes	No
	ryeA	gcvB	GATAAAAAGAGACCGAACACGATTCCTGTATTCGGTCCAGGGAAATGGCTCTTG	CTTCCTGAGCCGGAACGAAAAGTTTTATCGGAATGCGTGTTCTGGTGAACTTTTGGCTTACGGTTGTGATGTTGTGTTGTTGTGTTTGCAATTGGTCTGCGATTCAGACCATGGTAGCAAAGCTACCTTTTTTCAC	5	-37.4	No	No	Yes	Yes	Yes
	ryeA	cyaR	GCGAAGGAAATGCTTCTGGCTTTTAACAGATAAAAAGAGACCGAACACGATTCCTGTATTCGGTCCAGGGAAATGGCTCTTGGGAGAGAGCCGTGCGCTAA	CTGAAAAACATAACCCATAAAATGCTAGCTGTACCAGGAACCACCTCCTTAGCCTGTGTAATCTCCCTTACACGGGCTTATTTTTTA	6	-32.8	No	No	Yes	Yes	Yes
	ryeA	gadY	CTTCTGGCTTTTAACAGATAAAAAGAGACCGAACACGATTCCTGTATTCGGTCCAGGGAAA	GTTTCCCGTGCCAACAGGGAGTGTTATAACGGTTTATTAGTCTGGAGACGGCAGACTATCCTCTTCCCGGTCCCCTA	2	-39.6	No	No	No	Yes	Yes
	ryeA	micF	GTTTGCGTGCAAAATGGTCAATAAAAAGCGTGGTGGTCATCAGCTGAAATGTTAAAAACCGCCCGTTCTGGTG	ATTTATTACCGTCATTCATTTCTGAATGTCTGT	1	-10.2	No	No	No	No	Yes
	ryeA	arcZ	TTCTGGCTTTTAACAGATAAAAAGAGACCGAACACGATTCCTGTATTCGGTCCAGGGAAATGGCTCTT	TTTCCCTGGTGTTGGCGCAGTATTC	1	-19.5	Yes	No	No	Yes	Yes
	ryeA	sroH	TGCTTCTGGCTTTTAACAGATAAAAAGAGACCGAACACGATTCCTGTATTCGGTCCAGGGAAATGGCTCTTGGG	AAAGTCCGGTAATGGCGTTCTGAATACCAGAGATAATTCTCTGGCGAAACCCACCTTAAGGTGGGTTTTGTTA	2	-26.9	No	No	Yes	No	Yes
	ryeA	gadY	CTGGCTTTTAACAGATAAAAAGAGACCGAACACGATTCCTGTATTCGGTCCAGGGAAATGGCTCTTGGG	ACTGAGAGCACAAAGTTTCCCGTG	1	-20.2	No	No	No	Yes	Yes
	ryeA	gcvB	GCTTCTGGCTTTTAACAGATAAAAAGAGACCGAACACGATTCCTGTATTCGGTCCAGGGAAATGGCTCTTGGG	TTTACCCTGTCTGTCCATAGTGATTAATGTAGCACCGCCTAATTGCGGTGCTTTTTTTT	2	-23	No	No	No	Yes	Yes
	ryeA	cyaR	TTCTGGCTTTTAACAGATAAAAAGAGACCGAACACGATTCCTGTATTCGGTCCAGGGAAATGGCTCTTGGGAGA	GCTGAAAAACATAACCCATAAAATGCT	1	-8	No	No	No	Yes	Yes
	ryeA	dsrA	GCTTCTGGCTTTTAACAGATAAAAAGAGACCGAACACGATTCCTGTATTCGGTCCAGGGAAATGGCTCTTGGGA	AAGTTTCATCCCGACCCCC	1	-13.6	No	No	Yes	No	No
	ryeA	gcvB	ATGCAGGCTTAGTTGCCTTGCCCTTTAAGAATAGATGACGA	GTGTTTGCAATTGGTCTGC	1	-16	No	No	No	Yes	No
	ryeA	gcvB	AAAGTCAGCGAAGGAAATGCTTCTGGCTTTTAACAGATAAAAAGAGACCGAACACGATTCCTGTATTCGGTCCAGGGAAATGGCTCTTGGG	ACTTCCTGAGCCGGAACGAAAAGTTTTATCGGAATGCGTGTTCTGGTGAACTTTTGGCTTACGGTTGTGATGTTGTGTTGTTGTGTTTGCAATTGGTCTGCGAT	8	-46.2	No	No	Yes	Yes	Yes
	ryeA	arrS	AAAGTCAGCGAAGGAAATGCTTCTGGCTTTTAACAGATAAAAAGAGACCGAACACGATTCCTGTATTCGGTCCAGGGAAATGGCTCTTGGGAGAGAGCCGTGCGCTAAA	GTAATCCGATTTAAATATCGAGTCTCCTTGTTTCGACTTAAGCTGGCAATTGGATTGCCAGCTTTCTTTTA	43	-32.1	No	No	Yes	Yes	Yes
	ryeA	omrA	TATGGTTGACTATAAAGTCAGCGAAGGAAATGCTTCTGGCTTTTAACAGATAAAAAGAGACCGAACACGATTCCTGTATTCGGTCCAGGGAAATGGCTCTTGGGAGAGAGCCGTGCGCTAAA	GATTATTCGGTACGCTCTTCGTACCCTGTCTCTTGCACCAACCTGCGCGGATGCGCAGGTTTTTTTTC	6	-39.5	No	No	No	Yes	Yes
	ryeA	cyaR	CTTAGTTGCCTTGCCCTTTAAGAATAGATGACGACGCCAGGTTTTC	CTGAAAAACATAACCCATAAAATGCT	1	-3.3	No	No	No	Yes	No
	ryeA	arcZ	TTCTGGCTTTTAACAGATAAAAAGAGACCGAACACGATTCCTGTATTCGGTCCAGGGAAATGGCTCTTGGGAGAGAGCCGTGCGCTAAAAGTTGGCATTAATG	AAAACAGTGCTGTGCCCTTGTAACTCATCATAATAATTTACGGCGCAGCCAAGATTTCCCTGGTGTTGGCGCAGTATTCGCGCACCCCGGTCTAG	3	-52.1	Yes	No	No	Yes	Yes
	ryhB	oxyS	GTCTCGCGATCAGGAAGACCCTCGCGGAGAACCTGAAAGCACGACATTG	TTTCTCAACTCGAATAACTAAA	1	-6.8	No	No	No	Yes	No
	sdsR	gcvB	AATGCCAACTTTTAGCGCACGGCTCTCTCCCAAGAGCCATTTCCCTGGACCGAATACAGGAATCGTGTTCGGTCTCTTTTTATC	GTGTTGTTGTGTTTGCAATTGGTCTGCGATTCAGACCATGGTAGCAAAGCTACCTTTTTTCACTTCCTGTACATTTACCCTGTCTGTCCATAGTGATTA	3	-22.9	No	No	Yes	Yes	Yes
	sdsR	gcvB	AAGCCTGCATTAATGCCAACTTTTAGCGCACGGCTCTCTCCCAAGAGCCATTTCCCTGGACCGAATACAGGAATCGTGTTCGGTCTCTTTT	GTTGTTGTGTTTGCAATTGGTCTGCGATTCAGACCATGGTAGCAAAGCTACCTTTTTTCACTTCCTGTACATTTACCCTGTCTGTCCATAGTGATTA	2	-22.5	No	No	Yes	Yes	Yes
	sgrS	chiX	AAATCACCCGCCAGCAGATT	AAGTGACGGCATAATAATAAAAAAATGAAATTCCTCTTTGACGGGCCAATAGCGATATTGGCCATTTTTTT	1	-10.5	No	No	No	No	Yes
	sgrS	ryeA	TCATGTGTGACTGAGTATTGGTGT	TGGCTTTTAACAGATAAAAAGAGACCGAACACGATTCCTGTATTCGGTCCAGGGAAATGGCTCTTGGG	1	-17.3	No	No	No	Yes	No
	sibA	sibD	TGACGTGCTTCATCATAA	ACAAGGGTGAGGGAGGATTTCTCCCCCCTCTGATTGGCTGTTAATAAGCTGCGAAACTTACG	1	-11.3	No	No	No	Yes	No
	sibC	sibE	GTAAGGGTAAGGGAGGATTGCTCCTCCCCTGAGACTGACT	CAAGGGTAAGGGAGGATTTCTCCCCCCTCTGAT	3	-31.9	No	No	No	Yes	Yes
	sokB	arrS	GGTTCATTCGTTGGCCTCGGTTGATAGAAATATCGGTCGGGGCCTTCGT	GATTTAAATATCGAGTCTCCTTGTTTCGACTTAAGCTGGCAATTGGATTGCCAGCTTTCTTTT	1	-26.7	No	No	No	No	Yes
	sokC	arcZ	TATAGGAGGCCTCGGGTTGATGGT	AGCCGGGGTCATTTTTTA	2	-15.4	No	No	No	Yes	No
	spf	sroH	ATATTTTAGCCGCCCCAGTCAGT	ATGTTCTCATCTTCCAGGATGCAGCAGACTGA	1	-7.7	No	No	No	No	Yes
	ssrS	arrS	GTCCGAGAAGCCTTAAAACTGCGACGACACATTCACCTTGAACCAAGGGTTCAAGGGTTACAGCC	GTAATCCGATTTAAATATCGAGTCTCCTTGTTTCGACTTAAGCTGGCAATTGGATTGCCAGCTTTCTTTTA	1	-26.8	No	No	No	Yes	No
	ssrS	arcZ	CCAAGGGTTCAAGGGTTACAGCCTGCGGCG	AAAACAGTGCTGTGCCCTTGTAACTCATCATAATAATTTACG	9	-28.7	No	Yes	No	Yes	No
