# Supplementary material for: Hfq CLASH uncovers sRNA-target interaction networks linked to nutrient availability adaptation
Source: eLife. 2020 May 1;9:e54655. doi: 10.7554/eLife.54655 (PMC7213987; doi:10.7554/eLife.54655)
Supplement: Supplementary file 5. — 3'UTR-mRNA and mRNA-3'UTR interactions were isolated from the statistically filtered data and compared against the RILseq data (Melamed et al., 2016), Salmonella TIERseq data (Chao et al., 2012) and RNA-seq data that was used transcription start sites in E. coli (Thomason et al., 2015). TEX insensitive are RNA fragments in 3'UTRs that are not sensitive to Terminator 5’-Phosphate Dependent Exonuclease treatment and therefore may be generated by an independent promoter. TEX sensitive are RNA fragments that likely have 5' monophosphates as, according to the TEX data, they were degraded by TEX. [file elife-54655-supp5.xlsx]

## Sheet: Supplementary File 5
Supplementary File 5. Overview of putative 3'UTR derived sRNAs.
3'UTR-mRNA and mRNA-3'UTR interactions were isolated from the statistically filtered data and compared against the RILseq data [1], Salmonella TIERseq data [2] and RNA-seq data that was used transcription start sites in E. coli [3].
TEX insensitive are RNA fragments in 3'UTRs that are not sensitive to Terminator 5’-Phosphate Dependent Exonuclease treatment and therefore may be generated by an independent promoter.
TEX sensitive are RNA fragments that likely have 5' monophosphates as, according to the TEX data, they were degraded by TEX.
3'UTR of:	in RILseq S-chimeras [1]	in Salmonella TIERseq [2]	TEX_data_analyses [3]	Total number of chimeras	Number of chimeras with mRNAs	Comments	References:
ahpF	No	No	TEX sensitive	17	17		[1] Melamed, S., Peer, A., Faigenbaum-Romm, R., Gatt, Y. E., Reiss, N., Bar, A., … Margalit, H. (2016). Global Mapping of Small RNA-Target Interactions in Bacteria. Molecular Cell, 63(5), 884–897.
allE	Yes	No	TEX sensitive	6	6		[2] Chao, Y., Li, L., Girodat, D., Förstner, K. U., Said, N., Corcoran, C., … Vogel, J. (2017). In Vivo Cleavage Map Illuminates the Central Role of RNase E in Coding and Non-coding RNA Pathways. Molecular Cell. https://doi.org/10.1016/j.molcel.2016.11.002
asnS	No	Yes	unclear	8	8		[3] Thomason, M. K., Bischler, T., Eisenbart, S. K., Förstner, K. U., Zhang, A., Herbig, A., … Storza, G. (2015). Global transcriptional start site mapping using differential RNA sequencing reveals novel antisense RNAs in Escherichia coli. Journal of Bacteriology. https://doi.org/10.1128/JB.02096-14
atpE	No	No	unclear	1	1		[4] Chao, Y., & Vogel, J. (2016). A 3’ UTR-Derived Small RNA Provides the Regulatory Noncoding Arm of the Inner Membrane Stress Response. Molecular Cell. https://doi.org/10.1016/j.molcel.2015.12.023
bamB	No	No	unclear	5	5		[5] Guo, M. S., Updegrove, T. B., Gogol, E. B., Shabalina, S. A., Gross, C. A., & Storz, G. (2014). MicL, a new σE-dependent sRNA, combats envelope stress by repressing synthesis of Lpp, the major outer membrane lipoprotein. Genes and Development. https://doi.org/10.1101/gad.243485.114
bhsA	Yes	No	TEX sensitive	12	10		[6] Miyakoshi, M., Chao, Y., & Vogel, J. (2015). Cross talk between ABC transporter mRNAs via a target mRNA-derived sponge of the GcvB small RNA. The EMBO Journal. https://doi.org/10.15252/embj.201490546
clpB	No	Yes	unclear	263	3		[7] De Mets, F., Van Melderen, L., & Gottesman, S. (2018). Regulation of acetate metabolism and coordination with the TCA cycle via a processed small RNA. Proceedings of the National Academy of Sciences. https://doi.org/10.1073/pnas.1815288116
cobB	No	No	unclear	2	2		[8] Miyakoshi, M., Matera, G., Maki, K., Sone, Y., & Vogel, J. (2018). Functional expansion of a TCA cycle operon mRNA by a 3′ end-derived small RNA. Nucleic Acids Research. https://doi.org/10.1093/nar/gky1243
cpxA	No	No	unclear	1	1
cpxP	Yes	Yes	TEX sensitive	2423	2074	CpxQ 3'UTR derived sRNA [4]
cra	No	No	unclear	16	13
cspE	No	No	unclear	4	4
cspF	No	No	unclear	20	20
csrA	No	No	unclear	7	7
cstA	No	No	unclear	2	1
cutC	Yes	Yes	TEX sensitive	67	41	MicL 3'UTR derived sRNA [5]
cycA	No	No	unclear	1	1
dadX	No	No	unclear	15	15
deoR	No	No	unclear	4	4
dinI	Yes	No	unclear	1	1
djlA	No	No	unclear	1	1
dsbB	No	No	TEX sensitive	1	1
dut	No	No	unclear	1	1
dxr	No	Yes	TEX insensitive	6	2
exuR	No	No	unclear	11	7
fabA	No	No	unclear	1	1
fadD	No	No	TEX sensitive	7	6
fieF	No	No	TEX sensitive	5	5
fimA	No	No	TEX sensitive	6	4
fklB	No	No	TEX sensitive	7	2
flgL	Yes	Yes	TEX sensitive	3	3
folB	No	No	unclear	1	1
fre	Yes	No	unclear	17	17
ftsA	No	No	unclear	10	3
ftsN	No	No	unclear	1	1
gadE	Yes	No	TEX sensitive	249	213	GadF 3'UTR derived sRNA [1]
gatD	No	No	unclear	1	1
gatY	No	No	unclear	1	1
gcvH	No	No	TEX sensitive	28	6
glnA	Yes	No	TEX insensitive	37	28
glpD	No	No	TEX sensitive	4	2
gltI	No	No	TEX sensitive	59	39	SroC sRNA located in intergenic region between gltI and gltJ [6]
gmhB	No	No	unclear	248	9
grxD	No	No	TEX sensitive	1	1
hemG	No	No	TEX insensitive	318	4
hemN	No	No	TEX sensitive	4	2
hns	No	No	unclear	1	1
ibpB	No	No	TEX sensitive	1	1
insG	No	No	unclear	2	1
insH1_2	No	No	TEX sensitive	39	35
kgtP	No	No	TEX sensitive	6	4
lepB	No	No	unclear	1	1
lpp	Yes	No	unclear	3	3
macB	No	No	unclear	5	3
malG	Yes	Yes	TEX sensitive	293	168	MalH 3'UTR derived sRNA (this work)
malM	Yes	Yes	TEX sensitive	24	16
marB	No	No	unclear	3	3
mntH	No	No	unclear	2	1
mprA	No	No	unclear	2	1
msrC	No	No	TEX sensitive	65	62
murI	No	No	TEX insensitive	272	6
murR	No	No	unclear	2	2
mutH	No	No	unclear	6	3
nuoB	No	No	unclear	2	1
osmB	No	No	unclear	1	1
parC	No	No	unclear	5	3
pdhR	No	No	TEX sensitive	42	34
pitA	No	No	TEX insensitive	8	8
plsC	No	No	unclear	1	1
pnp	No	No	unclear	2	2
ptsH	No	No	unclear	5	5
rbsB	No	No	unclear	36	9
rfbD	No	No	TEX sensitive	1	1
roxA	No	No	unclear	4	4
rplS	No	No	unclear	1	1
rsmG	No	No	unclear	3	1
rspR	Yes	No	unclear	5	5
secF	Yes	No	unclear	2	2
sfsA	No	No	unclear	2	2
srmB	No	No	unclear	6	2
sucD	Yes	Yes	TEX sensitive	46	21	SdhX 3'UTR derived sRNA [7,8]
tnaC	No	No	TEX sensitive	2	2
tusB	No	No	unclear	4	1
ucpA	No	No	TEX sensitive	1	1
uhpT	Yes	No	TEX sensitive	1	1
wcaN	No	No	TEX sensitive	1	1
wzzB	No	No	unclear	6	2
xylA	No	No	TEX sensitive	3	3
yadD	No	No	TEX insensitive	1	1
yaiW	No	No	unclear	1	1
ybcJ	No	No	unclear	2	2
ybiJ	Yes	No	TEX insensitive	117	112
ychH	No	No	unclear	1	1
ychJ	No	No	unclear	1	1
yciM	No	No	unclear	3	2
yciX	No	No	TEX sensitive	7	7
ydcH	No	No	unclear	2	2
ydhK	No	No	unclear	1	1
ydjM	No	No	unclear	4	1
yfaE	No	No	unclear	2	2
yfcL	No	No	unclear	1	1
yfgD	No	No	TEX sensitive	36	4
ygaM	No	No	TEX insensitive	7	0
ygdI	No	No	unclear	1	1
ygfZ	No	No	TEX sensitive	31	1
ygjR	No	No	unclear	2	2
yhcN	Yes	No	TEX sensitive	2	1
yibB	No	No	TEX sensitive	1	1
yibN	No	No	unclear	2	2
yicH	No	No	unclear	8	8
yjbJ	No	No	TEX sensitive	3	3
yjbR	No	No	unclear	1	1
ymjA	No	No	unclear	1	1
yncL	No	No	TEX sensitive	5	4
yqeF	No	No	unclear	1	1
yqjK	No	No	unclear	2	2
zwf	No	Yes	unclear	1	1
