# Supplementary material for: Hfq CLASH uncovers sRNA-target interaction networks linked to nutrient availability adaptation
Source: eLife. 2020 May 1;9:e54655. doi: 10.7554/eLife.54655 (PMC7213987; doi:10.7554/eLife.54655)
Supplement: Supplementary file 6. — Shown are the statistically filtered 3'UTR-mRNA interactions identified in the Hfq CLASH data. Genomic sequences of the 3'UTR and mRNA fragments found in the chimeras are also provided. Total_hybrids indicates the total number of interactions involving these sequences that were found. Min. MFE indicates the minimal folding enrgies of the chimera, which was calculated using RNADuplex from the ViennaRNA package (Lorenz et al., 2011). The last column indicates which of the sRNA-mRNA interactions were also found in the RIL-seq S-chimera data (Melamed et al., 2016). The mRNA fragment location column indicates where in the mRNA target the putative 3'UTR-derived sRNA was base-paired. [file elife-54655-supp6.xlsx]

## Sheet: Supplementary File 6
Supplementary File 6 Overview of 3'UTR-mRNA interactions found in the Hfq CLASH data and compared to the RIL-seq data								References:
Shown are the statisitcally filtered 3'UTR-mRNA interactions identified in the Hfq CLASH data.								[1] Lorenz, R. et al. ViennaRNA Package 2.0. Algorithms Mol. Biol. (2011). doi:10.1186/1748-7188-6-26
Genomic sequences of the 3'UTR and mRNA fragments found in the chimeras are also provided.								[2] Melamed, S., Peer, A., Faigenbaum-Romm, R., Gatt, Y. E., Reiss, N., Bar, A., … Margalit, H. (2016). Global Mapping of Small RNA-Target Interactions in Bacteria. Molecular Cell, 63(5), 884–897.
Total_hybrids indicates the total number of interactions involving these sequences that were found.
Min. MFE indicates the minimal folding enrgies of the chimera, which was calculated using RNADuplex from the ViennaRNA package [1]
The last column indicates which of the sRNA-mRNA interactions were also found in the RIL-seq S-chimera data [2]
The mRNA fragment location column indicates where in the mRNA target the putative 3'UTR-derived sRNA was base-paired.
	3'UTR	mRNA	3'UTR fragment sequence	mRNA fragment sequence	mRNA fragment location	total_hybrids	min. MFE	in RIL-seq?	Exponential Phase	Transition Phase	Stationary Phase
	yfgD	hemN	TAGTTCGGATAAGGCGTTCGCGCCGCATC	TTAAATAGTGAATGGCGCTTCGTTTACAAAGTAGAAAACGAAAGCGCCATCAATGTGCTGAGAACAAGATTGCCTGATGCGCTGGGCAACAAAACCTGTTGAAATTATTGCTTTT	CDS	1	-19.8	No	No	Yes	No
	cobB	yfgD	TAATACACGCGCACTTTTCCGGCCTCTTTTAT	GGATAAGGCGTTCGCGCCGCATCCG	3UTR	2	-12.7	No	Yes	Yes	No
	yfgD	ytfQ	GTAGTTCGGATAAGGCGTTCGCGCCGCATCCG	GGGAGCACGCTTTACACCGGGGGAAACC	3UTR	1	-18.9	No	No	No	Yes
	cutC	flc	CATGTCGCCCAATATGATGCTTGCTCGTACCAGGCCCCTG	CTTTTAGCAGTTTTTATTGGCGGTGGTACGGGAAGCGTGGCGAGATGGCTGTTAAG	CDS	1	-38	No	No	No	Yes
	cutC	map	TTTTTACCGTTGCATCATGTCGCCCAAT	TACGCAAGGATGACACCATCCCGG	CDS	3	-9	No	No	No	Yes
	cutC	lpp	TTTTTACCGTTGCATCATGTCGC	CTGGTACTGGGCGCGGT	CDS	1	-9.6	Yes	No	Yes	Yes
	cutC	fusA	TTTTTACCGTTGCATCATGTCG	CACCGGTGTAAACCATAAAATCGGTGAAGTTCATGACGGCGCTGCAACC	CDS	1	-13.2	No	No	No	Yes
	cutC	sucA	TGATGCTTGCTCGTACCAGGCCCCTGC	GGGCAGGGGCCGGAGCA	CDS	1	-25.2	No	No	No	Yes
	cutC	ybaT	TTTTTACCGTTGCATCATGTCGCCCAAT	TAAGGGCTGATCATGATGAACACGGAAGGTA	CDS	5	-23.4	No	No	Yes	Yes
	cutC	maeA	AATATGATGCTTGCTCGTACCAGGCCCC	GCATTCTGGGGCTTGGTG	CDS	7	-20.2	No	No	No	Yes
	cutC	insG	GATTTTTACCGTTGCATCATGT	ACAGGGAGATAAAACAGACGATGCAACGGAGCAGGCTGA	CDS	3	-18.4	No	No	Yes	No
	cutC	yhcH	ATGATGCTTGCTCGTACCAGGCCCCTGCA	AACGAGCAAGCCATCAT	CDS	1	-21.9	No	No	No	Yes
	cutC	lpp	ATTTTTACCGTTGCATCATGTCGCCCAATATGATGCTTGCTCGTACCAGGCCCCTGCAATTT	ATGGAGATTAACTCAATCTAGAGGGTATTAATAATGAAAGCTACTAAACTGGTACTGGGCGCGGTAATCCTGG	CDS	14	-28.7	Yes	Yes	Yes	Yes
	cutC	ompX	ATATGATGCTTGCTCGTACCAGGCCCCTGCA	ACGACTGGGCAAGCATCTACGGTG	CDS	2	-19.9	No	No	Yes	Yes
	cutC	cstA	TTGCATCATGTCGCCCAATATGATGCTTGCTCGT	TTCTGCACGGCGCGCTGGGCGGCATGATGGATGTGGCG	CDS	1	-33.8	No	No	Yes	No
	cutC	cfa	CTTGCTCGTACCAGGCCCCTGCAATTTCAACAGGGGCCTTTTTT	ATATTATGTTTTTACGGGGACAGGATCGTTCCCGACTCACTATGGATAGTCATTTCGGCAAGGGTTC	5UTR	1	-16	No	No	Yes	No
	gatY	gcvA	AACGCACCTGCCATTTAAC	TCGCCAATGGATCCTGGCGAAAGCCGCTGCTGAAC	CDS	1	-8.7	No	No	Yes	No
	grxD	hupB	AATCCAGCCCTTGTGGCGAACTTGAA	ATTGATCGACAAGATTGCTGCAGGGGCTGATATCTCTAA	CDS	1	-31.8	No	Yes	No	No
	yciM	aceK	AGAAAAAGCCTGCCAGGGGAGAAATCGCA	CTCCCGAGCGGCTTTTT	CDS	1	-20.5	No	Yes	No	No
	yciM	uof	ATTATTAATGTTCCATTGTGCTCCGGCAACGACGGCGCAGAAAAAGCCTGC	TTTTTATTAACAATATT	5UTR	1	-3.1	No	Yes	No	No
	djlA	ytjA	GTTTTATCGCGTTGACC	TATCGCGTTAATCGCCGCCGCACTTGGGTTTGGTGGTCTGGCCGGTACCGCT	CDS	1	-11.6	No	No	Yes	No
	cpxA	tamB	CGATCTTGCCGCTCAGTCGGCGCTTTTGCATCGTCCGCGTCCAGCTTTTCG	AAAGTACGCGGCACGGTGGAA	CDS	1	-21.6	No	No	Yes	No
	uhpT	ycfQ	ACGTAACTGGTGACTTTTGCCCGGCA	ACAGTCACCAGGTACAAC	5UTR	1	-18.3	No	No	Yes	No
	malG	mlaD	GTTGTTCTGCCAATGTTATGCCGCTGCACCCTCAACTTACGT	GGTCAGTATTGGTGGCGTTGTTGTGGGTCGGGTGGCGGAT	CDS	2	-27.5	No	Yes	No	No
	malG	yhaM	ATGCCGCTGCACCCTCAACTTACGT	TGATCGGCGATGTCAGCGGCATGATTTGC	CDS	2	-20.4	No	Yes	No	No
	malG	ptsI	TGTTATGCCGCTGCACCCTCAACTTACGTTATCC	TCGTGACGTTGAAGGTGCAGAGCGTAACGGC	CDS	21	-33.4	Yes	No	Yes	Yes
	malG	gadX	CTTGTGACTGTTATTCGGCGCTCCACGGAGCGCCTTTTTT	TTATAGAGTTTTACTCAGACATAAAAAAAACCCGGCATAGGGGACCGGGAAGAGGATAGTCTGCCGTCTCCAGAC	CDS	1	-18.6	No	No	Yes	No
	malG	ydgD	CTTGTGACTGTTATTCGGCGCTCCACGGAGCGCCTTTTTTTC	GAGTGTGATATGCGTACAACCATTGCTGTAGTGTTGGGTGCAATTAGTTTGACGTCTGCTTT	CDS	1	-18.5	No	No	No	Yes
	malG	nuoM	GCTCCACGGAGCGCCTTTTTT	TTTGTCGGCGGCGGGTCTGTTTATTCTTTGTGGTCAGCTTTATGAACGTATCCATACCCGCGACATGCGCATGATGGGCGGTCTGTGGAGCAAGAT	CDS	2	-31.6	No	No	Yes	No
	malG	truD	TGTTATGCCGCTGCACCCTCAACTTACGTTATCCCAACTTGTGAC	TTGGCGGTAGCAACTTGCAGGGGGCGCAGCGCTGGGCGCAAAC	CDS	4	-32.1	No	No	No	Yes
	malG	bacA	TATCCCAACTTGTGACTGTTATTCGGCGCTCCACGGAGCGCCTTTTTT	ATGATTATTGTCGGTCACTTGTTGGGGTTTG	CDS	10	-24.1	Yes	Yes	Yes	Yes
	malG	murE	GCCAATGTTATGCCGCTGCACCCTCAACTTACGTTATCC	TAATCAAGGCGAGGGGACAGGTGGCAGATC	CDS	2	-24.4	No	Yes	No	No
	malG	wrbA	CCGCTGCACCCTCAACTTACGTT	AGTCGCTGAGGGTGCAAG	CDS	1	-19.9	No	Yes	No	No
	malG	yhcB	CGGCGCTCCACGGAGCGCCTTTTTT	GAGATGTTCATGACCTGGGAATATGCGCTAATTGGGTTAGTCGTCGGCATCATTATTGGTGCTGTGGCCATGC	CDS	1	-18.9	No	No	Yes	No
	cpxP	malG	TTTTCCTTGCCATAGACACCATCCCTGTCTTCCCCCACATGCTGT	ACTTGTGACTGTTATTCGGCGCTC	3UTR	1	-8.5	No	No	No	Yes
	ptsH	malG	TTTTAAAAATCAGTCACAAGTAAGG	TATCCCAACTTGTGACTGTTATTCGGCGCTCCA	3UTR	5	-18.5	No	No	Yes	No
	sulA	malG	TACATCGCCAGGGGTGCTCGGCATAAGCCGAAGA	ATGTTATGCCGCTGCACCCTCAACTTACGTTATCCCAACTTGTGACTGTTATTCGGCGCTCCACGGAGCGC	3UTR	52	-26.7	No	Yes	Yes	Yes
	malG	opgD	ATCCCAACTTGTGACTGTTATTCGGCGCTCCACGGAGCGCCTTTTT	TAAGCACTTTCTTGCCGCTGAAAACGACCAGCGCGGGACCATTCACAACACCAGAAGGACT	5UTR	1	-22.1	No	No	Yes	No
	malG	ompC	CAATGTTATGCCGCTGCACCCTCAACTTACGTTATCCC	TTAATGAGGGTTAATCAGTATGCAGTGGCATAAAAAAG	5UTR	30	-30.1	Yes	Yes	Yes	No
	malG	hinT	TGTTGTTCTGCCAATGTTATGCCGCTGCACCCTCAACTTACGT	CGCAGTGTGGCGCGGCGTAGCATGGCGCAACGCATGGCTATT	5UTR	3	-35.8	No	No	Yes	No
	malG	slyB	TGTTGTTCTGCCAATGTTATGCCGCTGCACCCTCAACTTACGTTA	TGAGGGATGCTTGCGTGGCGTTTCATGGTGAACAGG	5UTR	3	-36	No	No	Yes	No
	malG	ompA	GTTATGCCGCTGCACCCTCAACTTACGTTATCCC	CGCCAGGGGTGCTCGGCATAAGCC	5UTR	26	-25.8	Yes	Yes	Yes	Yes
	msrC	prc	TTATAATGACGCCTGTTCATGCCTGCGCTTGT	AGGCCGGGCCAGGCATGAACATGTTTTTTAGGCTTACCGCGTT	CDS	21	-30.4	No	Yes	Yes	Yes
	msrC	proQ	ATAACGTAGCATTTACTGATAGCGTCATTATAATGACGCCTGTTCATGCCTGCGCTTGTTGGCT	ATTGTGCGCGCAGAACACCTGGTGTTCTGAAACGGAGGCCGGGCCAGGCATGAACATGTTTTTTAGG	CDS	41	-32.5	No	Yes	Yes	Yes
	yncL	cof	CACGCAGCACGTACTGTCAGAGAAATCAGTGCTCTGACAGTACGCA	ATTTGACGCACTGGCTGGACTATCCACA	CDS	1	-13.5	No	Yes	No	No
	yncL	rne	TAGTGATTTTGCACGCAGCACGTACTGTCAGAGAAATCAGTGCTCTG	AGACACGAGGCCATCGGTTCACACCCGGAAAGGCGTTACTTTGCCCGCA	5UTR	1	-13.2	No	No	Yes	No
	yncL	rluD	TGATGTAGTGATTTTGCACGCAGCACGTA	AGATATTTCATGCGCGTCATGACGTTTTGA	5UTR	1	-11.1	No	Yes	No	No
	yncL	fruB	GTCAGAGAAATCAGTGCTCTGACAGTA	AAACGTTTCAGCGCGATCTTGTCTTTAAC	5UTR	1	-12.9	No	No	No	Yes
	lpp	mtr	GTGAAAAATGGCGCACATTGTGC	AGCTTTAATTTACTGCCGGTGTATCAGTAATCAGCGGTGCCT	CDS	1	-12.4	No	No	Yes	No
	lpp	crr	GTGAAAAATGGCGCACATTGTGCGCCATTTTTTT	AGAAGTAATTCTTGCCGCAGTGAAAAATGGCGCCCATCGGCGCCATTTTTTTATGCT	CDS	2	-36.8	No	No	Yes	No
	ygjR	malM	ACAGTGTAAAAGGTATGTAACA	ATCAGCAGTGTAAAAGG	CDS	2	-6.2	No	No	No	Yes
	glnA	cysA	TTTAGTTGCCGTGGAAACTT	CTTCCACGGCACCGACGT	CDS	1	-18.7	No	No	Yes	No
	glnA	yceF	TTTTAGTTGCCGTGGAAACTTTTCGCCTGTCTCTGGCAGG	CCCTGCACTGCGCGGGTAGCTTTAAGAGTGAAGGATTTGGCATTACGCTGTTTGAGCGTTTAGAGGGGCGT	CDS	1	-24	No	No	Yes	No
	glnA	oppC	TTTTAGTTGCCGTGGAAACTTTTCGCCTGTCTCTGGCAGGCCTGGGAT	GCGTTATTTGTAATCCTGGCACCGATGCTTTCCCAGTTTGCCTATGACGATACTGACTGGGCGATGATGT	CDS	1	-30.3	No	No	Yes	No
	glnA	aceB	TTTTAGTTGCCGTGGAAACTTTTCGCCTGTCTCTGGCAGGCC	TTTCTGACTGAGCTGGTGACGCATTTTACGCCACAACGCAATAAACTTCTGGCAGCGCGCATTCAGCAGCAGCA	CDS	1	-24.6	No	No	Yes	No
	glnA	phnN	GTTTTAGTTGCCGTGGAAACTTTTCGCCTGTCTCTGGCAGGCCTGGGATCGGTGGCAAGCACATCA	CACGCCGGATTCGACGT	CDS	1	-14	No	No	Yes	No
	glnA	rpoE	TTTTAGTTGCCGTGGAAACTTTTCGCC	TAGCGCGTGGAAATTTGGTTTGGGGAGACTTTACCTCGGATGAGCGA	CDS	1	-13.6	No	No	No	Yes
	glnA	mhpB	TTTAGTTGCCGTGGAAACTTTTCGCCTGTCTCTGGCAGGCCTGGGATCGGTGGCAAGCACATCA	ACGCCGCTGCCCGGTTT	CDS	1	-20.6	No	No	Yes	No
	glnA	proX	TTTTCGCCTGTCTCTGGCAGGCCTGGGATCGGTGGCAAG	CTTTTGCTGCCGATCTGCCGG	CDS	17	-26	No	Yes	No	No
	glnA	amtB	TTTTAGTTGCCGTGGAAACTTTTCGCCTGTCTCTGGCAGGCCT	TTCTCTGGGTGGTTTACGGTTACTCGCTGGCGTTTGGTGAGGGCAACAACTTCTTCGGCAACATTAA	CDS	4	-31.6	No	No	Yes	No
	wzzB	oppA	TTTCGGTTTTAAAGAAAAAGGGCAGGGTGGTGACACCTTGCCCGTTTTTT	ATTACACATGCTGGTTAATACCAGTAATTATAATGAGGGAGTCCAAAAAACAATGACCAACATCACCAAGAGA	CDS	1	-15	No	No	Yes	No
	wzzB	mepS	TTCGGTTTTAAAGAAAAAGGGCAGGGTGGTGACACCTTGCCCGTTTTT	AGGAATTGTTTCAACATGCCCAGGTAATTAGTCTCGTGTCGCTT	5UTR	1	-15.1	No	No	Yes	No
	rspR	insJ	TTTCCTCTCATCCCATCCGGGGTGAGAGTCTTTTCCCCCGCCTTATGGCTCA	TGCCATTTGGCGGGGATTTTTTTATTT	5UTR	5	-27.8	No	Yes	Yes	No
	pdhR	cpxP	AAAAATTATCCAGAAGATGTTGTAAATCAAG	TTCCTTGCCATAGACACCATCCCTGTCTTCCCCCACAT	3UTR	1	-9.3	No	No	Yes	No
	pdhR	glnL	CATATAAAAGCGCGGCAACTAAACGTAGAACCTGT	TAAGTGTTTTAGTTGCCGTGGAAACTTTTCGCCTGTCTCTGGCAGGCCTGGGATCGGTGGCAAGC	5UTR	33	-20.9	No	Yes	Yes	No
	glpD	pykA	TTGCCCCTTCTGGACACTTTTCCGAAATGATGGCGGAAAAAAACGGGACCCTTTGGCCCCGTTCTATTTA	CATGTCCAGAAGGCTTCGCA	CDS	2	-20.3	No	No	Yes	No
	xylA	tsgA	TAGCGATACCGGGCATTTT	GCATTTTAATCTCTATCT	CDS	1	-4.9	No	No	Yes	No
	xylA	oppA	CTAACTGTGCAGTCCGTTGGCCCGGTTATCGG	GGTTAATACCAGTAATTATAATGAGGGAGTCCAAAAAACAATGACCAACATCACCAAGAGA	CDS	1	-11.2	No	No	No	Yes
	xylA	gltJ	AGTCCGTTGGCCCGGTTATCGGTAGC	ATACGCTGGGTAACAATCTTCGAGGGTAGCAGTT	5UTR	1	-14.5	No	No	No	Yes
	ychH	csgD	AATAATGCAGTTTGCTGACCAGTCAGTTTGCGCTGACTGGTCAATCTCGT	AGGGCTGATTTATTACTACACACAGCAGTG	5UTR	1	-12.1	No	No	No	Yes
	yjbJ	ytfB	TTAATCCCTCCTGCCCGACGTGTACAAGGATGTACGC	CAAGACGCGGAGCAGGAGGAAACCA	CDS	1	-26.7	No	No	No	Yes
	yjbJ	ftsB	TCCCTCCTGCCCGACGTGTACAAGGATGTAC	CAGAGGATGTAGAGTCGTCTTCGGATGCATGGGATGATGATGCCGTTTTTCAGGGGGCAGGATGGGTAAA	CDS	2	-30.7	No	No	No	Yes
	cra	tamA	TTTTAAACCCGCCCGTTAATTAACTCACCAGCTGAAATTCACAATAATTAAGTGATATC	CATTGACGGGCGTGGTTTCGCCGCG	CDS	5	-24.1	No	No	Yes	No
	cra	yhcN	TCATTTTAAAACGGTGATGACGATGAGGGATTTTTT	CAAATAAACCCTCATCGTCTTGTCCGACGATATTGCCCCCGGTTC	CDS	3	-26.4	No	No	Yes	No
	cra	cpxP	TTCAGTGGGAAATTGTGGGGCAAAGTGGGAATAAGGGGTGAGGCTGG	ATTGAGTAGTAGCAACTCACGTTCCCAGTAGTAAACCCTGTTTTCCTTGCCATAGACACCATCCCTGTCTTCCCCCACATGCTGTGGGGGTTTTTTT	CDS	4	-34.5	No	No	Yes	No
	cra	lyxK	AACTCACCAGCTGAAAT	CTGAAATCAATCACGCC	CDS	1	-3.4	No	No	Yes	No
	yhcN	yfiH	GTCTTGTCCGACGATATTGCCCCCGGTT	CTTCTCTTATCGTCGCGACAAGACCACCGGT	CDS	1	-25	No	No	Yes	No
	ygdI	aldB	AAGGTAAAAAAAAGCACCGCAATTAGG	ACATTATTCCGGTGACGCTGGAGTTGGGCGGTAAG	CDS	1	-8.9	No	No	No	Yes
	gatD	gatB	CATTCACCAATGGTCCCCCTTCGT	ATTACAAAATAAAATTCTGACTATCTTACAGGGGTGACCTATGTTT	CDS	1	-16.7	No	No	Yes	No
	fklB	hns	AGATTCGTCGTATCATAGA	AAAAAGCAATGGATGAGCAAGG	CDS	1	-5.9	No	No	No	Yes
	fklB	yiaF	CGTATCATAGACTGACTAAAGGCCGTAGAGCCTGAACAACACAGACAGGTACAGGAAGAAAAAA	GTCTACCAACCCTGACTGCCGAT	CDS	1	-12.1	No	No	Yes	No
	yfcL	uvrB	TCTGCTCCGCCAACGACGCATA	TGCGCCGACTGGCGGAGCTG	CDS	1	-26.4	No	No	Yes	No
	rbsB	yaaJ	ATAAATACGTCATCGACAGATGAACGTGTAATATA	CACTTTTCGCACCGGATTTGTGC	CDS	1	-8.6	No	No	Yes	No
	rbsB	ytfQ	AACGTGTAATATAAAGAAAAGCAGGGCACGCGCCACCCTAACACGGTGGCGCATTTTA	GGGAGCACGCTTTACACCGGGGGAAACC	3UTR	1	-14.9	No	No	Yes	No
	rbsB	yjdM	ATATAAAGAAAAGCAGGGCACGCGCCACCCT	CTTTTTCGGCAATCTGCCGTTTTTTGGCGCTTTTGCCCTGCTGACTTTT	5UTR	5	-31.2	No	No	Yes	Yes
	rbsB	mdtK	TAAAGAAAAGCAGGGCACGCG	ATTTCCCCTGCTTCTTCTTTTTGCTGCCCATTCAGGCGGCTTTTTA	5UTR	2	-18.1	No	No	Yes	No
	gmhB	wzzB	GTGAGCTGAAAGCCGCGTCGCAACTGCTCTTTAACAATTTA	TGATTGATTTACTAGTGCAGTTGTGGCGTGGCAAGAT	CDS	7	-34.6	No	Yes	Yes	No
	gmhB	dhaK	TCGACACGGCGGATGTGAATCACTTCACA	ATCGGCAGTCAGTGGTCGCCGTGTCGTTGA	5UTR	1	-23.7	No	No	Yes	No
	gmhB	mnmG	CGTCGCAACTGCTCTTTAACAATTTATCAGACAATCTG	TTATCCACAGGGCAGTGCGATCCTAATAAG	5UTR	1	-19.5	No	Yes	No	No
	srmB	lipA	TTTGGCAGCCTCACGAAGCGTATCCATCACTCGGGTAAGTTCA	AAACCCATTGTGATGGAACGCG	CDS	2	-25	No	Yes	No	No
	dsbB	gcvH	GCTCCTGCGGGAGCGCT	CTTTATTCCTCTTCTGCGGGAGAGGATCAGGGTGAGGAAAATTTATGCCTCACCCTCACTCTC	3UTR	1	-21	No	No	Yes	No
	gltI	dacA	AGAACCAGGGGCGGAAATTCCAGCCCTCTCGATTGTTACGTAGCACGGA	TCCGTGACGTACCGAATGAAT	CDS	1	-16.5	No	Yes	No	No
	gltI	tnaA	AGGGGCGGAAATTCCAGCCCTCTCGATTGTTACGTAGCACG	CAAATATGCCGATATGCTGGCGATGT	CDS	1	-10.4	No	No	No	Yes
	gltI	malM	ATTACAAGAACCAGGGGCGGAAATTCCAGCCCTCTCGATTGTTACGTAGCACG	TCCACCTTTATCAGCAGTGTAAAAGGCAAGGGGTA	CDS	3	-12.9	No	No	Yes	Yes
	gltI	paaJ	TTCCAGCCCTCTCGATTGTTACGTAGC	TCCTCAGGCATTCTGGCTGAGGAGATTGTTCCGGTTGTGTTGAAAAACA	CDS	1	-13.6	No	No	No	Yes
	gltI	tnaB	AATTACAAGAACCAGGGGCGGA	ATTGATAACTCCCACGGCGGGCGTTTCAAAACCGTGCTGTTAACCTTCCTGCCACCTGCGTTGTTGTATCTGATCTTCCCGAAC	CDS	1	-24.7	No	No	Yes	No
	gltI	waaU	TTCCAGCCCTCTCGATTGTTACGTAGCACGGA	ATTCTTACATTCTGGGTTTTGATCATTGGTATAAGCGTTA	CDS	1	-8.6	No	No	Yes	No
	gltI	ybhP	ATTACAAGAACCAGGGGCGGAA	GGCGCGCACGTTTCCGGTGCAATTTCCTCTACTACGACTGGACAGG	CDS	1	-10.5	No	No	No	Yes
	gltI	pnuC	ACAAGAACCAGGGGCGGAAATTCCAGCCCTCTCGATTGT	TGATGACGGTATTTATCAATCCGGTGTTTGCATTTTTGAC	CDS	1	-14.3	No	No	Yes	No
	gltI	dfp	AGAACCAGGGGCGGAAATTCCAGCCCTCTCGATTGTTACGTAGCACGG	AGCGACAACAACGCATTACACCTTTTCTGG	CDS	1	-11.8	No	No	Yes	No
	gltI	nuoA	ATTACAAGAACCAGGGGCGGAAATTC	TCGTTGCCATTGGCCTGTGTTGCCTGATGCTGGTAGGC	CDS	1	-13	No	No	Yes	No
	gltI	rnlA	GAACCAGGGGCGGAAATTCCAGCCCTCTCGATTGTTACGT	ATCAATTGGTCCTATGCCAGGGTCAAGGG	CDS	1	-12.1	No	No	No	Yes
	gltI	raiA	GAACCAGGGGCGGAAATTCCAGCCCTCTCGATTGTTACGTAGCACGGA	CTGCAGCACAAAGGCGAAGCACGTCGTGCCGC	CDS	1	-15.7	No	No	No	Yes
	gltI	ydcZ	AATTACAAGAACCAGGGGCGGAAA	TAGCCAGACGCTCATTTTAATCAGAGGATGGTGCCGCCTTTGGTTAACTGTTCGT	CDS	2	-22.1	No	No	Yes	No
	gltI	trkH	GGAAATTCCAGCCCTCTCGATTGTTACGTAGCACGGACAGAC	CTTGGCGTGGTTGCTGATAACTTTACCAGTATG	CDS	1	-11.5	No	No	Yes	No
	gltI	gltX	GGCGGAAATTCCAGCCCTCTCGATTGTTACGTAGCACGGACAGACTA	ATCTGCACGTTGGCGGCGCGCGTACTGCT	CDS	1	-15.6	No	No	Yes	No
	gltI	cspE	TTACAAGAACCAGGGGCGGAAATTCCAGCCCT	AGGTAATTTTGATGTCTAAGATTAAAGGTAACGTTAAGTGGTTTA	CDS	1	-11.1	No	No	No	Yes
	gltI	ydcR	GCGGAAATTCCAGCCCTCTCGATTGTTAC	AAAATACCAGCAGCTTGC	CDS	1	-4	No	No	Yes	No
	gltI	wzyE	GGAAATTCCAGCCCTCTCGATTGTTACGTAGCAC	AATATGATCGTGCTGGCGCGTGAAGGG	CDS	1	-14.4	No	No	Yes	No
	gltI	cydA	AACCAGGGGCGGAAATTCCAGCCCTCTCGATTGTTACGTAGCACG	GGAAGAGGAGACGAACAAATTTGCGATTCAGATCCCTTA	CDS	1	-14.7	No	No	No	Yes
	gltI	allR	ATTACAAGAACCAGGGGCGGAAATTCCAGCCCTCTCGAT	TAGCTTCAGCAATTTACGATGATGTCGGTAGTGTTGT	CDS	1	-9.1	No	Yes	No	No
	gltI	amiA	ACAAGAACCAGGGGCGGAAATTCCAGCCCTCTCGATTGTTACGTAGCACG	TTCATGCCGATGGCTTTACCAAC	CDS	1	-12	No	No	Yes	No
	gltI	yebS	TTACAAGAACCAGGGGCGGAAATTCCAGCCCTCTCGA	TTTGTGGCGTTGGTGATTT	CDS	1	-12.4	No	No	Yes	No
	gltI	prlC	TAATTACAAGAACCAGGGGCGGAAATTCCAGCCCTCTCGATTGTTACGTAG	ATTTTCGCCGGTGGTTATGCCGCAGGTTACTACAGCTACCTGTGGGCTGACGTACTGGC	CDS	1	-20.4	No	No	Yes	No
	gltI	dfp	TTCCAGCCCTCTCGATTGTTACGTAGCACG	ATCCGTAAAAACCTTGATCTGATCTGCGCGAACGATGTTTCC	CDS	1	-10.3	No	No	Yes	No
	gltI	sra	AATTACAAGAACCAGGGGCGGAAATTCCAGCCCTCTCGATT	GCAGAAAACGCCCCGCTGAAAAGTAATTCATAACCATCAGTCCTCAAT	CDS	1	-17.9	No	No	No	Yes
	gltI	sucD	CAAGAACCAGGGGCGGAAATTCCAGCCCTCTCGATTGTTACGTAGCACG	AATAGCCCTCGCCGCTTCCCTCTACAGGAATGGCGAAGG	3UTR	1	-13	No	No	Yes	No
	gltI	pyrD	ATTACAAGAACCAGGGGCGGAAATTC	TTTATTTTCAGCCCTGGTTGTTTTATATTCATCGCTGTTGCTTATTTAGACATTTTGTACT	3UTR	4	-20.8	No	No	Yes	No
	gltI	cpxP	ATTACAAGAACCAGGGGCG	ACCATCCCTGTCTTCCCCCACATG	3UTR	1	-10.5	No	No	Yes	No
	gltI	yhhQ	AAGAACCAGGGGCGGAAATTCCAGCCCTCTCGATTGTTACGTAGCACGGA	CTCGAAAAAAGGGTAAGCACGTTATTATGTTAAGG	5UTR	1	-10.9	No	No	Yes	No
	gltI	secG	CAAGAACCAGGGGCGGAAATTCCAGCCCTCTCGATTGTTACGTAGC	GCTTCAGTGGGAAAGATTAAAAACTCCCGCTTTATTG	5UTR	1	-13.6	No	Yes	No	No
	gltI	fabR	CAAGAACCAGGGGCGGAAATTCCAGCCCTCTCGATTGTTACGTAGCACG	GTACTTTTGGCAAGGATTCAG	5UTR	1	-8.2	No	Yes	No	No
	gltI	cfa	TCTCGATTGTTACGTAGCACGGACAGAC	ATGTTTTTACGGGGACAGGATC	5UTR	1	-9	No	No	Yes	No
	gltI	rplK	AGGGGCGGAAATTCCAGCCCTCTCGATTGTTACGTAGCACGGAC	CCTTTTGTTTTTATGGGCCTTGCCC	5UTR	1	-12.9	No	No	Yes	No
	murR	cfa	TTCAGAGGGAATGGAGTGTAA	TGGATAGTCATTTCGGCAAGGGTTCCTCCTTTCCCTCTGTTCT	5UTR	2	-23.2	No	No	No	Yes
	parC	uxaC	TTTTCCAGAGAGCGGCTTTTAACAATG	GCTTTAACAATGCGCGTG	CDS	1	-5.6	No	Yes	No	No
	parC	ycjD	TAACAATGCCCTAACCTGATTTCA	TGATTCCAGGCGCACTAG	CDS	1	-6.7	No	Yes	No	No
	parC	ubiE	CTTTTCCAGAGAGCGGCTTTTAACAATGCCCTAACCTGATTTCAGGTGACGTACAATGC	CATGAATGATTTGATGTCATTTGGTATTCATCGTTTGTGGAAGCGATTCACGATTGATTGCAGCGGCGTACGCCG	CDS	1	-23	No	Yes	No	No
	osmB	malM	TGATTCTGTTCAGTACGAAATAACTGAATAATAC	TTTATCAGCAGTGTAAAAGGCA	CDS	1	-5.7	No	No	Yes	No
	csrA	cpxP	GCGACGATGAGCGATAAACAAGTTCTTCGAAGCACTCGTAAGAGGCGT	TTTCCTTGCCATAGACACCATCCCTGTCTTCCCCCACATG	3UTR	1	-6.6	No	No	No	Yes
	csrA	dapA	TCTTTATCGGTGAGACGCA	GAAAGCATAAAAAAAAC	5UTR	6	-2.3	No	No	No	Yes
	clpB	pheT	TTATGCACACCCCGCGCCGCTGAGA	TATTTGACGTGTACCGCGGTAAGGGTGTTG	CDS	1	-18.8	No	No	Yes	No
	clpB	mepS	CACCACTGACACGGAACAACGGCA	TCTGTTCCGTGCCGGTTCAAC	CDS	2	-19.3	No	Yes	No	No
	ibpB	menF	CCGCCATTCTGGTGGGGCTTTTT	TTACCCCGCCTGGAATGGCGAC	CDS	1	-30.9	No	Yes	No	No
	yadD	cpxP	TTATGACAGATGACGTGGGGTAAATTAATAACTGGCGCCATC	TTTTCCTTGCCATAGACACCATCCCTGTCTTCCCCCACATGCTGTGGG	3UTR	1	-16.8	Yes	No	Yes	No
	ftsN	pphA	TCTGTATTCGTAACCAAGGGGT	CCCAAGAGCCATTTCCCTGGACCGAATACAGGAATCGTGTTCGGTCTCTTTT	5UTR	1	-21.5	No	No	Yes	No
	zwf	yibB	AACATGATCTTGCGCAGATTGTA	GCTGAGAATTTTCCTTTCA	CDS	1	-5.1	No	No	No	Yes
	insG	yohC	TTTTTTGTCCCCAAGACTGACCGTCAACGCCACAATCTTTGACTGTTTGACATTGTCATGCCCGCAGGCCAGCG	ACTCACAACAAGGGGGCGGTATGAGCCATGTCTGGGGACTGTTT	CDS	1	-30.3	No	No	Yes	No
	cycA	thrL	TATTGGTGGTGTGTTTA	TTAGCACCACCATTACCACCACCATCACCA	CDS	1	-16	No	No	Yes	No
	ydjM	bolA	GCTACGCAGTGATAGAAATAATAAGA	GAAGAAAAATTAAGGGCGGCGTTCCAACCCGTATTCCTC	CDS	1	-6.9	No	No	No	Yes
	yicH	cbrB	CTTCACCACCAGCCCCTGC	GTTGTCTGGCTGGTGGCATAGGTGGCGTCGTTATCA	CDS	8	-19.8	No	No	Yes	No
	pitA	rraB	ATTTTGCGTTTGTAATCAGTCTCGAGCGGGTCAGT	AAGCGTAGCGCATCAGGC	3UTR	8	-9.1	No	No	Yes	Yes
	mprA	glmS	AACATGCTGGCCTTTTTGGCAAGCAGG	CAAGGCTCGGGGCGCCCGAAAAAA	5UTR	1	-10.7	No	No	Yes	No
	nuoB	mqsA	TTTGCGCCTGTCGGCAAAGGGATTTTTCTTCGCTTATTC	AAGGAGAAGTAATATGAAATGTCCGGTTTGCCACCAGGGAGAAATG	CDS	1	-24.7	No	Yes	No	No
	asnS	rssA	AGCCAGCGCCCGCTGGCTCTTTTT	GGATGTTCAATTGGTTCGCTGGTGGGCGCTGCCT	CDS	1	-29.6	No	No	No	Yes
	asnS	rssB	AGCCAGCGCCCGCTGGCTCTTTT	ATTGAGCCAGCGATGCGATGC	CDS	2	-23.4	No	No	Yes	No
	asnS	exuR	CCAGCGCCCGCTGGCTCTTTT	TTTAAAACCAGCGTGGCGTTAACC	3UTR	5	-22.3	No	No	Yes	No
	fre	glnL	ATATAAAAAAACCCGCCCCTGACAGGCGGGAAGAACGGCAACTAAACTGTTATT	AAGTGTTTTAGTTGCCGTGGAAACTTTTCGCCTGTCTCTGGCAGGCCTGGGATC	5UTR	17	-46.7	No	Yes	Yes	Yes
	yjbR	gadX	AATATCGGCGAAGTGCAGACCGGTGGTCGGCTCGTCGAGAATATACAGCGTCTGCCCGGTGCCGCGTTTTGACAG	CTGCGGAAGGAATAAGATTATAGAGTTTTACTCAGACATAAAAAAAACCCGGCATAGGGGACC	CDS	1	-22.5	No	No	No	Yes
	dinI	chiP	TGATTTTTTTTGCCGGGTCGCCCCGGCTTTTT	TCAGGGGGCGGAAGCCGGGGCGAATTTTGATTACGGCGATGCT	CDS	1	-35.5	No	No	Yes	No
	cspE	cydD	CTTAATCAGCGGGTTTTTTTT	ATAAATCTCGTCAAAAAGAGTTAACCCGCTGGTTAAAACA	CDS	3	-22.4	No	No	No	Yes
	cspE	csiE	CGTCAGCAAGAATTCAAAACCCGCTTA	GATCTTGCTGACGCTCT	CDS	1	-18.7	No	No	No	Yes
	rplS	cyaA	CTGGCCAATTGGCTGGCCCTTT	TACTTTGGTGCCAGCCTTTGGCAGCTCT	CDS	1	-26.4	No	Yes	No	No
	yqeF	yhfZ	GTTTCACTATCGTTTTC	TTTACTGAAAATTTATTATGCGTCGAACGTT	CDS	1	-3.7	No	Yes	No	No
	yaiW	ftsQ	GGTTCAGCAATTGCGCCCCAGCCCAAAA	AGTGTTGGTGAGCGGCTGGGTCGTGTTGGGCTGGATGGAA	CDS	1	-28.7	No	Yes	No	No
	murI	pheT	TATGCACACCCCGCGCCGCTGAGAAA	TATTTGACGTGTACCGCGGTAAGGGTGTTG	CDS	1	-18.8	No	No	Yes	No
	murI	hupB	CCCGCGCCGCTGAGAAAAAGCGAAGCGGCACTGCTCTTTAACAATTT	TTTGCCGTTAAAGAGCGTGCTGCCCGTACTGGCCGCAACCCGC	CDS	2	-33.9	No	Yes	No	No
	murI	ftsK	ATGCACACCCCGCGCCGCTGAGAA	TGTCTGCGCTGGGTGTGCGTAATCTGGCGGGTTATAACGAAAAA	CDS	2	-27	No	Yes	No	No
	murI	ybaB	ACGCCGCCGGGTCAGCGGGGTTCTCCTGAGAACTCCGGCAGAGAAAGCAAAAATAAATGCT	AGCCTGCTGGAAGACGACAAAGAGATGCTGGAAGACCTGGTGGCTGCAGCATTCAACGACGCA	CDS	1	-45.4	No	Yes	No	No
	exuR	ycgY	AGCAATAACATTGCGGTAGTGCATCTTTTAAAACCAGCGT	GTAACAATATTCAGGTAG	CDS	1	-3.4	No	No	Yes	No
	exuR	glnH	TTTGAATGCTTTCTTATCTCACGATTTAACAGGGAATAG	GCACAATTTTAGCGCACCAGATTGGTGCCCCAGAATGGTGCATCTTCAG	5UTR	1	-9.4	No	No	Yes	No
	plsC	csgD	ATTTTTGCGGGGAACACTTTCCTGCACGGTAT	TTTATTACTACACACAGCAG	5UTR	1	-5.3	No	No	No	Yes
	dut	fruB	GCGTGGGTGCCGCCTGGCAAGTGCT	CTAAGCCAGGTTGGCGCTTTT	5UTR	1	-24.9	No	Yes	No	No
	dxr	yhhW	CCATCTGATCGTAAGTAGTTGGCTTTATAAGGT	TTTTGCCAACTATTACGATCC	CDS	2	-23.2	No	Yes	No	No
	wcaN	ppc	AACGGTTGATAAGAAAATTATAACGGCAGTGAAAATTCGCAGCAA	AATGCGACGTGAAGGATACAGGGC	5UTR	1	-8.8	No	Yes	No	No
	yibN	aceB	ATTTTGCTGCCGCCCTG	GCGATGGGCGGCATGGCGGCGTTTAT	CDS	2	-20.5	No	No	No	Yes
	yqjK	cpxP	GACAGTTTTCCTTGCTA	TTTTCCTTGCCATAGACACCATCCCTGTCTTCCCCCACAT	3UTR	2	-6.9	No	No	Yes	No
	gadE	tufB	TATCCACCAGTAGAACCCTTCGTTGCCC	CTGGCGTTGAAATGTTCCGCAAACTGCTGGACGAAGGCCGTGCTGGTGAGAACGTAGGTGTTCTGCTGCGTGGTATC	CDS	3	-30.6	No	No	No	Yes
	gadE	rssA	TTTATTCCCCTGGTATGTGTATCCACCAGTAGAACCCTTCGTTGCCCGAATGCTGGCAGGAACTGTTGGCAGAACGGCAACATTTTTT	ATTGAAATTGATATCGTTGCAGGATGTTCAATTGGTTCGCTGGTGGGCGCTG	CDS	6	-32.1	Yes	No	No	Yes
	gadE	rcnB	CTTTATTCCCCTGGTATGTGTATCCACCA	TGAGTTAAGTAGTTTCATTGCTGACTTTAAGCATTTCAAACCAGGGGACACCGT	CDS	5	-19.9	No	No	Yes	Yes
	gadE	wbbI	TGCTGATTTCATTACCCCCGGTG	GGAGGAGGGGGTAGTGATTCTG	CDS	1	-21.1	No	No	No	Yes
	gadE	lexA	TCCCCTGGTATGTGTATCCACCA	ATAACTGTATATACACCCAGGGGGCGGAATGAA	CDS	5	-22	No	No	No	Yes
	gadE	gatB	TGTGTATCCACCAGTAGAACCCT	TCTTACAGGGGTGACCTATGTTTTCAGAAGTCATGCGTTATA	CDS	1	-8.5	No	No	No	Yes
	gadE	yohP	ATCCACCAGTAGAACCCTTCGTTGCCCGAATGCTGGCAGGAACTGTTGGCAGAACGGCAACATTTTTTTTG	CAAATAAAGGAACGCCAATGAAAATTATACTCTGGGCTGTATTGATTATTTTCCTGATTGGGCTACTGGTGGTGACTGGC	CDS	68	-36.6	Yes	No	No	Yes
	gadE	thrS	CTTTATTCCCCTGGTATGTGT	TTTTCAACCAGGGGCTGAAGT	CDS	1	-18.9	No	No	Yes	No
	gadE	fabZ	TGTATCCACCAGTAGAACCCTTCGTTGCCCGAATGCTGGCAGGAACTGTTGGCAGAACGGCAACATTTTTTT	TTCCCGTTCTTACTGGTGGATCGCGTG	CDS	9	-24.1	Yes	No	Yes	Yes
	gadE	ygaM	CCCTGGTATGTGTATCCA	TATCGGCGCACTGTTAAGCA	CDS	7	-5.7	No	No	No	Yes
	gadE	elbB	TCCACCAGTAGAACCCTTCGTTGCCCGAATGCTGGCAGGAACTGTTGGCAGAACGGCAAC	CGTTGATTGTGCCGGGGGGGTTTGGC	CDS	1	-21.5	No	No	No	Yes
	gadE	clpS	CTTTATTCCCCTGGTATGTGTATCCACCAGTAGAACCCTTCGTTGCCCGAATGCTGGCAGGAACTGTTGGCAGAACGGCAACATTTTTTTT	AATTGATGCTCGCTGTTCACTACCAGGGGAAGGCCATTT	CDS	22	-27.3	No	No	Yes	Yes
	gadE	gsiB	TTTATTCCCCTGGTATGTGT	CGTTTTACCAGGGGCTGTTCGG	CDS	2	-17.6	No	No	No	Yes
	gadE	mdtD	TCCACCAGTAGAACCCTTCGTTGCCCGAATGCTGGCAGGAACTGTTGGCAGAACGGCAACATTTTTTT	CAGGTCGGTCCGCTGCTCGGTCCGGCGCTCGGCGGTCTGCTGGTGGAGTACGC	CDS	2	-49.5	No	No	No	Yes
	gadE	mdtF	ATCCACCAGTAGAACCCTTCGTTGCCCGAATGCTGGCAGGAACTGTTGGCAGAACGGCAACATTTTTTTTGT	GTTCGGGATGGTGCTGGCGATAGGGTTACTGGTGGATGACG	CDS	1	-40.5	No	No	No	Yes
	gadE	tufA	TATCCACCAGTAGAACCCTTCGTTGCCC	ACTGGCGTTGAAATGTTCCGCAAACTGCTGGACGAAGGCCGTGCTGGTGAGAACGTAGGTGTTCTGCTGCGTGGTAT	CDS	2	-30.6	No	No	No	Yes
	gadE	cysM	TCCCCTGGTATGTGTAT	ATTTTAGCCAGGGGGCGGGGATTTAAG	CDS	1	-17.8	No	No	No	Yes
	gadE	gltI	AAACGACTTTATTCCCCTGGTATGTGTATCCACCAGTA	CACTGAACTAATTACAAGAACCAGGGGCGGAAATTCC	CDS	35	-22.7	No	No	Yes	Yes
	gadE	acrB	CCACCAGTAGAACCCTTCGTTGCCCGAATGCTGGCAGGAACTGTTGGCAGAACGGCAACATTTTTTT	TACTGTCGGCGGTATTCGTACCGATGGCCTTCTTTGGCGGTTCTACTGGTGC	CDS	6	-48	Yes	No	No	Yes
	gadE	slyB	TTATTCCCCTGGTATGTGTATCCACCAGTAGAACCCTTCGTTGCCCGAATGCTGGCAGGAAC	GGTGCTGTTCTTGGTGGTTTCCTGGGGAATACTG	CDS	1	-29.4	No	No	No	Yes
	gadE	yjjM	TCCCCTGGTATGTGTATCCACC	TTACGCCCAGGGGAAACG	CDS	1	-20.5	No	No	Yes	No
	gadE	ilvL	GATGCTGATTTCATTACCCCCGGTGATTACTAAAGGAGAGGCTAAAACGAC	ACCGAAAGGTCCGGGGGTTTTTTT	3UTR	2	-18.8	No	No	Yes	No
	gadE	rsfS	TTTATTCCCCTGGTATGTGTATCCACCA	ACCATTTTTATCTATTTGATTCACCCAGGGGGAAA	5UTR	3	-20.6	No	No	Yes	No
	gadE	trxA	TCCACCAGTAGAACCCTTCGTTGCCCGAATGCTGGCAG	TAGTTGGTTAATGTTACACCAACAACGAAACCAACACGCCAGGCTT	5UTR	1	-9.8	No	No	Yes	No
	gadE	rssA	CTTTATTCCCCTGGTATGTGTATCCACCAGTAGAACCCTTCGTTGCCCGAATGCTGGCAGGAACTGTTGGCAGAACGGCAACATTTTTTTTGT	ACCGCCTGAGTAGCACTATGTTAACCGAGCAGTAGCGATGTGGCTACGATTGCATTCCAGGGGAATCTTGCGG	5UTR	27	-49	Yes	No	Yes	Yes
	ucpA	malM	ATTTGTGGGGAGGATTTCGTCTTGAACTAAGTTCACCAGGCT	ATCAGCAGTGTAAAAGG	CDS	1	-3.9	No	No	Yes	No
	secF	flhD	TCCCGTTGATGTTGAAAATCCCGGTCAGAA	TAATTATTTTTTACCGGGGCTTCCCGGCGACATCACGGGGTG	5UTR	2	-29.1	Yes	No	Yes	No
	sucD	mqsR	GCCCTCGCCGCTTCCCTC	CAGGGAGGCGGGGGTTATGGAA	CDS	1	-24.8	No	No	No	Yes
	sucD	ybjE	AATAGCCCTCGCCGCTTCCCTCTACAGGAATGGCGAAGGGCTGTCGGTTT	TTTTTTAATGATCTGGC	CDS	1	-5.5	No	No	Yes	No
	sucD	nlpD	GTTTCGACATGGTTGGCC	CTTTGTCACTGGTTTCGCTATGGCTGG	CDS	1	-9.6	No	No	No	Yes
	sucD	ackA	CGACATGGTTGGCCATCGT	TCCCTGACGTTTTTTTAGCCACGTATCAATTATAGGTACTTCCATGTCGAGTA	CDS	3	-18.2	Yes	Yes	No	No
	sucD	ydcF	ACAGGAATGGCGAAGGGCTGTCGGTTTCGACATGGTTGGCCATCGT	ATGAACATTACCCCGTTTCCGACGC	CDS	1	-13.4	No	No	Yes	No
	sucD	lpxA	TTCGACATGGTTGGCCATCGTAT	TATCGTTGGACCCCATGTCGAAATTGG	CDS	1	-22.9	Yes	Yes	No	No
	sucD	yhcD	TTCGACATGGTTGGCCATCGTATGATGGCCTTTTT	AGAGTGCCAATGAAACGGATAATAACAGGATGCCTGCTGCTGAACTT	CDS	1	-14.3	No	No	Yes	No
	sucD	tmcA	GAAATAGCCCTCGCCGCTTCCCTCTACAGGAATGGCGAAGGGCTGTCGGTTTCGACATGGTTGGCCATCGT	CACAATGCAATACTTTTGGTAAAAGCATTTAACTTCCGGGGCAGGGATGGCTGAACTGAC	CDS	1	-25.3	No	No	Yes	No
	sucD	proP	TCTGTAATAAGAAATAGCCCTCGCCGCTTCCCTC	TGATGCCTGCCTATTACCTGATGGTAGTGGCGGTGGTTGGTTTAATCACCGGCGTAACCA	CDS	1	-23	No	No	No	Yes
	sucD	hisS	TCTGTAATAAGAAATAGCCCTCGCCGCTTCCCTCTA	CATTGAGGGAAGCGTTGAGGGTTCATTTTTATATTCAG	5UTR	7	-39.4	No	Yes	Yes	No
	sucD	katG	TATCTGTAATAAGAAATAGCCCTCGCCGCTTCCCTCTACA	CACTGTAGAGGGGAGCAC	5UTR	2	-24.1	No	No	No	Yes
	rfbD	glcG	TTTTGCATCTTGTTCGTGATGGTGGAG	GCCCTTGAAAAGGAATAACAAAATGAAAACTAAAGTCATTCTTAGCCAGCAAATGGCGAGTGCAATTATTGCCG	CDS	1	-18.5	No	No	Yes	No
	insH1_2	ybaY	ATATATTACCCTTTATTTTTGGGGGCGTCTCAACGCCCCATTTT	GGCGAGGAAAGTTAGCCCGCTGGTGCATTGATAATAAGGAGAAATGAATGAAACTCGTGCACATGGCCAGTGG	CDS	1	-19.5	No	Yes	No	No
	insH1_2	slyB	CTTCTGTTATATATTACCCTTTATTTTTGGGGGCGTCTCAACGCCCCATTTTT	TTCAGGGCGGTGATGATTCCAACGTTATCGGTGCAATTGGCGGTGCTGTTCTTGGTGGTTTCCTGGGGAATAC	CDS	1	-26.4	No	No	Yes	No
	insH1_2	yohP	TAAACCTTCTGTTATATATTACCCTTTATTTTTGGGGGCGTCTCAACGCCCCATTTTTAA	TCTGGGCTGTATTGATTATTTTCCTGATTGGGCTACTGGTGGTGACT	CDS	1	-17.9	No	No	No	Yes
	insH1_2	ompC	CCTCAAGCCACTTCCTTTAGAAGCACAACCTTGCTTCTAACTATATAAACCTTCTGTTATATATTACCCTTTATTTTTGGGGGCGTCTCAACGCCCCATTTT	GCCGACTGATTAATGAGGGTTAATCAGTATGCAGTGGCATAAAAAAGCAAATAAAGGCATATAACAGAGGGTTAATAAC	CDS	32	-35.5	No	Yes	Yes	Yes
	lepB	yaeH	CGAAGTTTAAGGTTGGCACCTCCAGGTTGCCACGGCACACG	CAATCTGAAAAGTCTGGGTATTAC	CDS	1	-8.6	No	No	Yes	No
	tnaC	casE	CTGTAGCCATCACCAGAGCCAAA	ATTTTTCTGGTGATGGTAAAA	CDS	1	-22.8	No	No	Yes	No
	tnaC	ybhP	TTGCCCTTCTGTAGCCATCACCAGAGC	GCAAAGACAGGAAAATTATGCCCGATCAAACACAACAA	CDS	1	-6.4	No	No	Yes	No
	fabA	pyrG	TCACGCCACTGTCATATT	ATATTTTTGTGACCGGCGGGGT	CDS	1	-13.7	No	No	Yes	No
	bamB	frc	CACTTTGAAAACGGCTCCT	CGAAAAATACACTGTCAC	CDS	5	-2.9	No	No	Yes	No
	ybcJ	cpxP	AACAGGCCGGTTCTCTTTT	TCCCTGTCTTCCCCCACATGCT	3UTR	2	-6.5	No	No	No	Yes
	cstA	cpxP	GAGGGGGGGATGTTGGCGAATGTTGGCTTAGTGCC	ATCCCTGTCTTCCCCCACATG	3UTR	1	-17.4	No	No	No	Yes
	flgL	gapA	CTGGGATCGCTGGGGCGGGCATTTTTTT	TTAAAATTCGGGGCGCCGACCCCATGTGGTCTCAAGCCC	5UTR	3	-31.2	No	No	Yes	No
	gcvH	livJ	GCTTTATTCCTCTTCTGCGGGAGAGGATCAGGGTGAGGAAAATTTATGCCTCACCCTCACTCT	AAGTGCTGAAAAACAACATCACAACACACGTAATAACCAGAAGAATGGGGATTCTCAGGATGAAC	CDS	1	-18.6	No	No	Yes	No
	gcvH	lpxH	TATTCCTCTTCTGCGGGAGAGGATCAGGGTGAGGAAAATTTATGCCTCACCCTCACTCTCT	ACTCTTTATTGCAGATCTTCATCTCTGCGTGGAAGAACCGGCGATCACCGCCGGTTTTCTGCGTT	CDS	1	-28.6	No	No	Yes	No
	gcvH	uspG	GCTTTATTCCTCTTCTGCGGGAGAGGATCAGGGTGAGGAAAATTTATGCCTCACCCTCACTCTCT	GATTTGTTCATGATTAACAGGGAGAAAGGGTTATGTATAAGACAATCATTATG	CDS	1	-22.7	No	No	Yes	No
	gcvH	oppA	TATTCCTCTTCTGCGGGAGAGGATCAGGGT	GGATTACACATGCTGGTTAATACCAGTAATTATAATGAG	5UTR	1	-11.5	No	No	No	Yes
	gcvH	ompA	TCTGCGGGAGAGGATCAGGGTGAGGAAAA	ATTTTGGATGATAACGAGGCGCAAA	5UTR	1	-8.4	No	Yes	No	No
	macB	cpxP	TTTGACAGGGGACAAGGGGCAGGTATGAATCAAAAATTTGA	TCCCTGTCTTCCCCCACA	3UTR	3	-19.2	No	No	No	Yes
	allE	trmA	TCATACCACTCGCCTGATT	ACACTGAGTAATCAGGCGGTGGTTT	CDS	1	-22.6	No	Yes	No	No
	allE	eda	CTCGCCTGATTATTTTTAGCTATGTTGGATTTTGCCACGGTTTATACCGTGGCTTTTTTT	ATTTGTAATCAGGCGAGAGA	5UTR	5	-21.9	No	No	Yes	Yes
	ybiJ	ompC	TATTTCCCTGTCTGTTTGCCGACAGACGCATATGCTCTAACCCTCATTGATCCTATGTTACCCTTGTTTGCCCGTCCGCCA	TGCCGACTGATTAATGAGGGTTAATCAGTATGCAGTGGCATAAAAAAGCAAATAAAGGCATATAACAGAGGGTTAATAACAT	CDS	92	-44.5	No	Yes	Yes	Yes
	ybiJ	clpB	GTTTGCCGACAGACGCATATGCTCTAACCCTCATTGATCCTATGTTACCCTTGTTTGCCCGTCCGC	CTTTGATCCGTTATGGGAGGAGTTATGCGTCTGGATCGTC	CDS	6	-31.6	No	No	Yes	No
	ybiJ	garD	ATGCTCTAACCCTCATTGATCCTATGTTACCCTTGTTTGCCCGTCCGC	CTTCTCGGATCAATGGGGGCTGC	CDS	3	-24	No	No	Yes	No
	ybiJ	waaJ	ATTGATCCTATGTTACCCTTGTTTGCCCGTCCGCC	ATGATATAAGGGTAGCATTGTGGACTCAT	CDS	1	-22.5	No	No	Yes	No
	ybiJ	ychH	ATGCTCTAACCCTCATTGATCCTATGTTACCCTTGTTTGCCCGTCCG	TCCGGAGGTGACATATGAAACGCAAAAACGCTTCGTTACTCGGTAACGTGCTCATGGGGTTGGGTCTGGTGGTAATG	CDS	2	-30.1	No	No	Yes	No
	ybiJ	thrL	CATTGATCCTATGTTACCCTTGTTTGCCCGTCCG	AGGTAACGGTGCGGGCTGAC	CDS	4	-17.1	No	No	No	Yes
	ybiJ	gltJ	ATTTCCCTGTCTGTTTGCCGACAGACGCATATGCTCTAACCCTCATTGATCCTATGTTACCCTTGTTTGCCCGTCCGCCA	ACGCTGGGTAACAATCTTCGAGGGTAGCAGTT	5UTR	1	-26.9	No	No	Yes	No
	ybiJ	cydA	TATGCTCTAACCCTCATTGATCCTATGTTACCCTTGTTTGCCCGTCCGCC	TACGTGGGATCAATTTGAGTTTT	5UTR	3	-20	No	No	Yes	No
	roxA	putP	CCAGTTCGCCTACGCCACCACCATCA	AGCTGGTGGCCGGGCGGTTGCGTGTGCATACCGAA	CDS	4	-22.4	No	No	Yes	No
	kgtP	cpxP	GAAAGTAACAATAGCGAACAGAC	TGCCATAGACACCATCCCTGTCTTCCCCCACATGC	3UTR	1	-4	Yes	No	Yes	No
	kgtP	aslB	TTCATTTCCGGCGGCGGAAAGCATCGCCGAGGCGATAAAGTGTTGAGCT	CGCTTCGGCGGGGTTTTTTG	5UTR	3	-28	No	Yes	No	No
	rsmG	fbaA	ACTGATATAACTGGTTACATTTAACGCCACGTTC	AAAACCTGGCGTAATCACTGGTGATGACGTACAGAAA	CDS	1	-16.2	No	Yes	No	No
	pnp	yfhM	GCCATTTGCCCTCCGCTGCGGCGGGGGGCTTTTAACCGGGCAGGACGCCTTGTTAGCAACC	AATTATTCGACGTTGCTAACGGGCCATTGTG	5UTR	2	-21.8	No	No	Yes	No
	fadD	yccS	GAGCGTTAAGTCAGTCGT	CTATTTGCGATTGGCTTAACGCTCTCTAC	CDS	6	-29.9	No	No	Yes	No
	mutH	proW	TCATTTTTTTGGCAGGGCTTTTTA	TTCATTAAGTAACTCTGCACTTGCCCGGTGACGCCGGGCATTATCACCCTGCCAAAAAAAGGA	CDS	2	-22.7	No	Yes	No	No
	mutH	ftsY	TTTTTGGCAGGGCTTTTTA	GAGGAGTGTAGTCGCAAATGG	CDS	1	-8.5	No	No	Yes	No
	cpxP	yfbV	TTCCTTGCCATAGACACCATCCCTGTCTTCCCCCACATG	TTACCCATGCAGGGATTGTGGTGGCTGGGC	CDS	3	-27.1	No	No	Yes	No
	cpxP	rng	TTTTCCTTGCCATAGACACCATCCCTGTCTTCCCCCACATGC	ATCGACCAGACCGAAGCGATGACCACCGTG	CDS	1	-7.7	Yes	No	Yes	No
	cpxP	astA	TTTCCTTGCCATAGACACCATCCCTGTCTTCCCCCACAT	ACATCTTTGACGGTGGGCCGACGCTTGAGTGTGACATCGACCGCGTGCGCGCCATCCGTAAAAGTCGGCTGGTGGAAGTGGCAG	CDS	4	-23.8	No	No	No	Yes
	cpxP	cyoA	TGTTTTCCTTGCCATAGACACCATCCCTGTCTTCCCCCACATGCTGTGGGGGTTTTTTTT	ACTCAGGAAATACAATAAAAGTTTGGGATGGTTGTCATTATTTGCAGGCACTGTATTGCTCAGTGGCTGTAATTCTGCG	CDS	81	-27.1	No	Yes	Yes	Yes
	cpxP	ihfA	TGCCATAGACACCATCCCTGTCTTCCCCCACA	ATCATTGAGGGATTGAACCTATGGCGCT	CDS	3	-20.4	No	No	Yes	No
	cpxP	mdtF	TGTTTTCCTTGCCATAGACACCATCCCTGTCTTCCCCCACATGCTGTGGGGGTTTTTTT	TTGACTATGTTCGGGATGGTGCTGGCGATAGGGTTACTGGTGGATGACGC	CDS	38	-30.6	No	No	Yes	Yes
	cpxP	yafV	TTCCTTGCCATAGACACCATCCCTGTCTTCCCCCACAT	TTTAGGTTGTGGTGAGTGGGGGTTGTGTTTAAGGACGGGGAGAGTCGGGGTATTACTACGAAAGCCCGCTCCCCGCAAGG	CDS	7	-37.2	No	No	Yes	No
	cpxP	uup	CATAGACACCATCCCTGTCTTCCCCCACAT	ATTGTTGATCTCGATCGCGGCAAGCTGGTGACCTATCCA	CDS	1	-12.2	No	Yes	No	No
	cpxP	glmS	TTTCCTTGCCATAGACACCATCCCTGTCTTCCCCCACATGC	GCAACGTGATGTAGCAGAAATCCTTCTTGAAGGTTTACG	CDS	1	-9.1	No	No	No	Yes
	cpxP	atpC	TTTTCCTTGCCATAGACACCATCCCTGTCTTCCCCCACATGC	GCCTTAATCGGAGGGTGATATGGCAATG	CDS	13	-21.7	Yes	Yes	Yes	Yes
	cpxP	lpxP	TTTCCTTGCCATAGACACCATCCCTGTCTTCCCCCACATG	TGGTTTGGGCTTGGTGTACTCTGGCTTTGGG	CDS	26	-23.9	No	Yes	No	Yes
	cpxP	yfeS	TTCCTTGCCATAGACACCATCCCTGTCTTCCCCCACATGC	AGATTACGAAGGGGATAGTTTAGCTGTCAACTATGGCAAGGTAGGTAGTATTGGTAAATTCCAGACAA	CDS	3	-28.5	Yes	No	No	Yes
	cpxP	waaQ	AGACACCATCCCTGTCTTCCCCCACATGCTGTGGGGGTTT	TACGGATCAGTGGATGGTGGCGCTGCTGGTACGTTGTTTACCTGC	CDS	12	-21.5	No	Yes	Yes	Yes
	cpxP	secM	TTTCCTTGCCATAGACACCATCCCTGTCTTCCCCCACATGCT	CTTATTAGGGATGGTTGCGGCGAGTTTAGG	CDS	26	-25.6	Yes	Yes	Yes	Yes
	cpxP	yhbW	TTTCCTTGCCATAGACACCATCCCTGTCTTCCCCCACATGC	TGGGATAGTGTGTCTTAACGCGGGAAGCCTT	CDS	5	-23.5	No	No	No	Yes
	cpxP	cysU	TTCCTTGCCATAGACACCATCCCTGTCTTCCCCCACAT	ATGGCTGGGGATTGCGGTGGCTATGG	CDS	18	-24.4	No	No	Yes	Yes
	cpxP	ldtD	TTCCTTGCCATAGACACCATCCCTGTCTTCCCCCACATGCTG	TATGATAAAAACAGGGGGCAAGGGATGTT	CDS	8	-22.3	No	No	Yes	Yes
	cpxP	artM	TTTCCTTGCCATAGACACCATCCCTGTCTTCCCCCACATGC	TAATGGTGTTCGGTGCGGCAGGGATTATT	CDS	2	-24.2	Yes	No	No	Yes
	cpxP	ydhJ	TTCCTTGCCATAGACACCATCCCTGTCTTCCCCCACAT	TGCCGGATGGTGGCTGTGGAATT	CDS	1	-24.2	No	Yes	No	No
	cpxP	yffL	TTTCCTTGCCATAGACACCATCCCTGTCTTCCCCCACATGCTGTGGGGGTTTTTTTT	CTCACAGTTGGGATGGTGCAGGGTTGGTAGGGGAA	CDS	12	-39.3	No	No	Yes	Yes
	cpxP	msbA	TTTCCTTGCCATAGACACCATCCCTGTCTTCCCCCACATGCTGTGGGGGTTTTTTT	CAGACGAAATCGTGGTCGTCGAGGATGGTGTCATTGTGGAA	CDS	13	-29.1	Yes	No	Yes	Yes
	cpxP	yiiR	TTTTCCTTGCCATAGACACCATCCCTGTCTTCCCCCACATGCTGT	ACTGGGCGATTTTACCGGGTGTCTGGCAATGGGCGGTGGGGCGTTTTGTCCCGACGTTGATT	CDS	10	-27.1	No	Yes	Yes	Yes
	cpxP	rpsM	TTTTCCTTGCCATAGACACCATCCCTGTCTTCCCCCACATGCT	AAATAATCGGGGTGATTGAATAATGGCAAAGGCACCAATTCGTGCAC	CDS	8	-19.6	No	Yes	No	Yes
	cpxP	yhdZ	TTTCCTTGCCATAGACACCATCCCTGTCTTCCCCCACAT	ACAGGGACGGATCGTGGTAGATGGCATCGAA	CDS	2	-23.3	No	No	Yes	No
	cpxP	cstA	TTCCTTGCCATAGACACCATCCCTGTCTTCCCCCACATGCTGTGGGGGTTTTTT	ATCTGCTGGGCGTGGTGTCTCCTGGC	CDS	6	-25.2	No	Yes	Yes	Yes
	cpxP	kdsD	TTTCCTTGCCATAGACACCATCCCTGTCTTCCCCCACAT	TGGGGATGGGAAAATCGGGGCATATTGGGCGAAAAATGGCGGCAACGTT	CDS	5	-24.6	No	No	No	Yes
	cpxP	rcdA	TTTCCTTGCCATAGACACCATCCCTGTCTTCCCCCACATGC	TTTGAGGATGGTTGAGAGGGTTGCAGGGTAGTAGATAAGTTTT	CDS	1	-21	Yes	No	Yes	No
	cpxP	tqsA	AGACACCATCCCTGTCTTCCCCCACATG	CGTTGATTTTTTGGGGATGGTTGTTAGGA	CDS	3	-18.5	No	No	No	Yes
	cpxP	yabI	TCCTTGCCATAGACACCATCCCTGTCTTCCCCCACAT	TTGATGGCGGTGGTGTTGGTGGC	CDS	1	-26.6	No	No	Yes	No
	cpxP	cbdB	TTTTCCTTGCCATAGACACCATCCCTGTCTTCCCCCACATGCTGTGGGGGTTTTTTTT	GCCTTGGGATGGTGATTTTGCAAGGTGGCGT	CDS	22	-27.3	No	No	Yes	Yes
	cpxP	yqeB	TTTCCTTGCCATAGACACCATCCCTGTCTTCCCCCACATGCTGTGGGGGTTTTTTTTA	AAATTAAAGCACCGTTGACGGGGATGGTGCGTGGCT	CDS	10	-36	Yes	Yes	Yes	Yes
	cpxP	insA_1	ACACCATCCCTGTCTTCCCCCACAT	TTTCTATCAGCTGTCCCTCCTGTTCAGCTACTGACGGGGTGGTGCG	CDS	2	-21	No	No	Yes	Yes
	cpxP	gadB	TTTTCCTTGCCATAGACACCATCCCTGTCTTCCCCCACATG	TGTATGCTCGGCGGGATGGCGATGAAATGGCGTTGGCG	CDS	12	-24.5	No	No	No	Yes
	cpxP	aceA	TTTCCTTGCCATAGACACCATCCCTGTCTTCCCCCACATGC	GGGCGGCACGTCTTCAGTCACCGCGCTGACC	CDS	1	-10.3	Yes	No	No	Yes
	cpxP	ycbL	ATCCCTGTCTTCCCCCACATGC	TGCTGCCACTGGGGGATGACGTGAT	CDS	3	-19.8	No	No	No	Yes
	cpxP	murJ	CACCATCCCTGTCTTCCCCCACAT	TCTTTGGCGCAGGGATGGCAACCG	CDS	1	-20.3	No	No	Yes	No
	cpxP	aceE	TTCCTTGCCATAGACACCATCCCTGTCTTCCCCCACATGC	ATGTGGGGTAGCCGTTGGGATGAACTGCTGCGTAAGG	CDS	34	-32.2	No	No	Yes	No
	cpxP	ychH	TTTCCTTGCCATAGACACCATCCCTGTCTTCCCCCACATGCTG	TGAAACGCAAAAACGCTTCGTTACTCGGTAACGTGCTCATGGGGTTGGGTCTGGTGGTAATGGTGGTCGGCGTGGGGTATTCAAT	CDS	11	-30.8	No	No	No	Yes
	cpxP	yccS	TTTTCCTTGCCATAGACACCATCCCTGTCTTCCCCCACATG	TAACGCTGGGGATGGTGGCAGCGGCGCTGACCGATCTCGATGACCGACTGGCGGGAC	CDS	26	-25.8	No	Yes	Yes	Yes
	cpxP	maeB	TTCCTTGCCATAGACACCATCCCTGTCTTCCCCCACA	AGGCAAACCGGTGATGGAAGGCAAGGGCGTTCTGTTTAAGAAATTCGCCGGGATTGATGTATTTGACATTGAAGTTGACGAACTCGACCCGGA	CDS	2	-28.9	No	No	No	Yes
	cpxP	torY	AGACACCATCCCTGTCTTCCCCCACAT	AAAGTCAGGGATGGATTATT	CDS	2	-20.5	No	No	No	Yes
	cpxP	plaP	TTTCCTTGCCATAGACACCATCCC	ATTCTGGGCATGGTTGTTTATGGCGTAT	CDS	2	-24.9	No	Yes	No	No
	cpxP	acrB	TTCCTTGCCATAGACACCATCCCTGTCTTCCCCCACA	ACAATGTTCGGGATGGTGC	CDS	1	-18.2	No	No	No	Yes
	cpxP	nuoM	TTTTCCTTGCCATAGACACCAT	TCGGCGTGTTCCTTGCCATCGAC	CDS	1	-6.5	No	No	No	Yes
	cpxP	yhjR	TTTTCCTTGCCATAGACACCATCCCTGTCTTCCCCCACATGCTG	CATTAAAACGCTGGCCGTTGCTGGCAGAGTTTGCGCAACAAAAGTAGGGGATTGGTGAATGGCCGTACTGGGATAGCAGGGGGTGCGGGGAGGCGTGGGGAC	CDS	7	-35.3	No	No	Yes	Yes
	cpxP	yfaL	TTCCTTGCCATAGACACCATCCCTGTCTTCCCCCACAT	AAGTTACAGTGATGGCGATGGCGGGGC	CDS	6	-25	No	No	No	Yes
	cpxP	ubiA	CCATAGACACCATCCCTGTCTTCCCCCACAT	ATTTTTAGGGCTGGCAATGAGTT	CDS	2	-11	No	No	Yes	No
	cpxP	yciM	TTTTCCTTGCCATAGACACCATCCCTGTCTTCCCCCACATGC	TATCCATAATGATGGGACGCGTGTTTATGGCGAAAGGAG	CDS	61	-31.3	No	Yes	Yes	Yes
	cpxP	dapB	TTTTCCTTGCCATAGACACCATCCCTGTCTTCCCCCACAT	AGGGATGGTGATCGGCA	CDS	4	-24.1	Yes	No	No	Yes
	cpxP	bepA	ACCATCCCTGTCTTCCCCCACAT	GGCGGGGATGGCGGCGCTGAC	CDS	1	-21.2	No	No	No	Yes
	cpxP	yedQ	CTGTCTTCCCCCACATGC	CATGTTACTCATCTCCT	CDS	1	-3.9	No	No	No	Yes
	cpxP	yccS	TTTTCCTTGCCATAGACACCATCCCTGTCTTCCCCCACATG	ACGCTGGGGATGGTGGCAG	CDS	7	-20.4	No	Yes	Yes	Yes
	cpxP	gdhA	TTCCTTGCCATAGACACC	ATTAATATATAAGGGTTTTATATCTATGGATCAGACATA	CDS	1	-9.6	Yes	No	No	Yes
	cpxP	psiF	TGTTTTCCTTGCCATAGACACCATCCCTGTCTTCCCCCACATGCTGTGGGGGTTTTTTT	ATACGCTCATGGTTAAAACATGAAGAGGGATGGTGCTATGAAAATAAC	CDS	31	-40.6	No	No	Yes	Yes
	cpxP	frsA	TTTCCTTGCCATAGACACCATCCCTGTCTTCCCCCACATGC	CCAGGCGATGGTGTGGCAACAAAAAGC	CDS	1	-25.1	No	No	No	Yes
	cpxP	kefC	TTCCTTGCCATAGACACCATCCCTGTCTTCCCCCACAT	TATTCAGATGGTGGAAGAGATGGCAATGG	CDS	2	-21.6	No	No	Yes	No
	cpxP	dadA	TTTTCCTTGCCATAGACACCATCCCTGTCTTCCCCCACATGC	AACAAAGGGCGGATGGTGCGTCTGGCGGAATAC	CDS	1	-27.4	No	No	Yes	No
	cpxP	oppA	TGTTTTCCTTGCCATAGACACCATCCCTGTCTTCCCCCACAT	AATGGCAGGGAATGTCGCGCTGGCAGCTGATGT	CDS	7	-26.1	Yes	No	No	Yes
	cpxP	tmcA	CACCATCCCTGTCTTCCCCCACA	AACTTCCGGGGCAGGGATGGCTGAACTGA	CDS	4	-24.6	No	No	Yes	No
	cpxP	dmlR	TCCTTGCCATAGACACCATCCCTGTCTTCCCCCACATGCTGTGGGGGTTTTTTTT	CTTTTGGTGTCTGGCAATT	CDS	1	-19.3	No	No	Yes	No
	cpxP	secE	ATAGACACCATCCCTGTCTTCCCCCACATGC	GATTGCTGCAGCGGGTGGTGTCGCGCTG	CDS	61	-24	No	No	Yes	Yes
	cpxP	bcp	TCCCTGTCTTCCCCCACATGCTG	CTGAAAGAACACGCCTGATTACTTTGCTCCATTCCGTGCTGGCTGCGCTTGCGGCCAGCATACC	CDS	1	-7.3	No	No	No	Yes
	cpxP	yifK	TTTTCCTTGCCATAGACACCATCCCTGTCTTCCCCCACATGCTGTGGGGGTTTTTTTT	GTGCCAGCGTGCTTCCGGGGATGGTGCCATGGTTTGTGA	CDS	56	-34.8	Yes	Yes	Yes	Yes
	cpxP	ydgC	ACCATCCCTGTCTTCCCCCACA	TGACTTGTTATGGAAGTGTTAAGGTAAAAAGATGGGGCTGGTAATC	CDS	1	-19.5	No	No	No	Yes
	cpxP	dnaK	GACACCATCCCTGTCTTCCCCCACATG	GTTCAGGGTGGTGTTCTGACTG	CDS	5	-18.6	No	No	Yes	Yes
	cpxP	dsbA	TTCCTTGCCATAGACACCATCCCTGTCTTCCCCCACAT	ACTTCATGGGTGGTGACCTGGGCAAAGA	CDS	2	-23.1	Yes	No	No	Yes
	cpxP	yhaO	TTTTCCTTGCCATAGACACCATCCCTGTCTTCCCCCACATGCT	TATGAGTATCGGGATGGCGATTGGCGCGGGGATT	CDS	11	-26.8	No	Yes	No	No
	cpxP	waaQ	TTTCCTTGCCATAGACACCATCCCTGTCTTCCCCCACATG	GATCAGTGGATGGTGGCGCTGCTGGTACGT	CDS	16	-25.6	No	Yes	Yes	Yes
	cpxP	paaX	TTTCCTTGCCATAGACACCATCCCTGTCTTCCCCCACAT	TTGCGCCTGACGCGACGGGCAGAAAGTAAAATTTATCGCGCAGAGCAACCTGCATGGGATGGTAAATGGCTCC	CDS	14	-25.1	Yes	No	No	Yes
	cpxP	yqfA	TTTCCTTGCCATAGACACCATCCCTGTCTTCCCCCACATG	GTCAGTCACGGCATTGGGTTGGTGTTTGGTATCGTTGGGCTGGTGTTGCTACTGGTTCAGGCGGTGGAT	CDS	7	-27.3	Yes	No	No	Yes
	cpxP	nupX	TTTCCTTGCCATAGACACCATCCCTGTCTTCCCCCACAT	TATCGGGGTGGTGGTGGGGGCG	CDS	2	-24	No	No	Yes	No
	cpxP	rclA	TTCCTTGCCATAGACACCATCCCTGTCTTCCCCCACAT	AAATGAACGCGTTTCGACAGGAAATCATCATGAATAAATATCAGGCAGTGATTATTGGTTTTGGCAAGGCTGGAAA	CDS	1	-24.7	No	No	No	Yes
	cpxP	mqsR	TTTTCCTTGCCATAGACACCATCCCTGTCTTCCCCCACATGCTGTGGGGGTTTTTTTTA	TAACAGGGAGGCGGGGGTTATGGAAAAACG	CDS	2	-25.8	No	No	No	Yes
	cpxP	rpsJ	TTCCTTGCCATAGACACCATCCCTGTCTTCCCCCACATG	ATGCAGAACCAAAGAATCCGTATCCGCCTGA	CDS	1	-4.1	No	No	Yes	No
	cpxP	ydiZ	TTTCCTTGCCATAGACACCATCCCTGTCTTCCCCCACATGC	CATGTGATAACAAAGGGGTGAACTATGGCCAGTGG	CDS	17	-27.7	Yes	No	Yes	Yes
	cpxP	aspC	TTTTCCTTGCCATAGACACCATCCCTGTCTTCCCCCACATGC	CCGGCAAAATTAACCTCGGGATTGGTGTCTATAAAG	CDS	16	-23.3	No	Yes	Yes	Yes
	cpxP	betT	TTTTCCTTGCCATAGACACCATCCCTGTCTTCCCCCACATGCT	TTCTGGGCATGGTGGGTGGCATGGTC	CDS	6	-25.6	No	No	Yes	Yes
	cpxP	gntK	TTCCTTGCCATAGACACCATCCCTGTCTTCCCCCACA	AACCGCTGGAAGGTGTTGTGGCAAGCAC	CDS	1	-25.4	No	No	Yes	No
	cpxP	cfa	TTTCCTTGCCATAGACACCATCCCTGTCTTCCCCCACAT	TTGGGGTTAGGCGAAAGTTATATGGATGGCTGGTGGGAATGTGACCGA	CDS	3	-27.5	Yes	No	No	Yes
	cpxP	ycdU	AGTAAACCCTGTTTTCCTTGCCAT	TTGGAAGAATGCAGGGTTTACT	CDS	2	-23.5	No	No	Yes	No
	cpxP	ycfQ	CACCATCCCTGTCTTCCCCCACATGCTGTGGGGGTTTTTTTT	TGTTCGACAGGGATGCCGC	CDS	4	-19	No	Yes	No	No
	cpxP	yedY	TTCCTTGCCATAGACACCATCCCTGTCTTCCCCCACATG	TGACCGTAGGTGTTTATGGCAAG	CDS	2	-26.3	No	No	No	Yes
	cpxP	yciQ	TTTTCCTTGCCATAGACACCATCCCTGTCTTCCCCCACATGCTGTGGGGGTTTTTTTT	CAAATTGCGTTCCACGGATGGAAGACTATGGCAGGGAAGTTTCG	CDS	45	-36.3	No	No	Yes	Yes
	cpxP	cspD	TTTTCCTTGCCATAGACACCATCCCTGTCTTCCCCCACATGCT	TCTTACTTGTATAAGATTTGCGAAGGATGTCGAAGCATGGAAAAGG	CDS	35	-21.6	Yes	No	Yes	Yes
	cpxP	ycaM	TTCCTTGCCATAGACACCATCCCTGTCTTCCCCCACAT	CCCTTTAATTTTGGCGAAGGATTTGTCTATGGCTGGGAATG	CDS	17	-30.3	Yes	Yes	Yes	Yes
	cpxP	radA	TTTTCCTTGCCATAGACACCATCCCTGTCTTCCCCCACATGCTGTGGGGGTTTTTTT	AGCTCAGTGATGGTGGTATGGGAAGGAACGCG	CDS	5	-30.5	No	No	No	Yes
	cpxP	rhsC	TTCCTTGCCATAGACACCATCCCTGTCTTCCCCCACA	AAAAGGAGATGGTCTATGGGGGCC	CDS	3	-21.9	No	No	No	Yes
	cpxP	acnA	ATCCCTGTCTTCCCCCACATG	TTGGCGTGCTGGGGTGGGGCGTTGGTGGGATC	CDS	1	-23.4	No	No	Yes	No
	cpxP	ppsA	CACCATCCCTGTCTTCCCCCACAT	ATGATGTAGACAGGGTTGGGGG	CDS	1	-19.6	No	No	No	Yes
	cpxP	argA	TTTTCCTTGCCATAGACACCATCCCTGTCTTCCCCCACATGCTGTGGGGGTTTTTTT	CATCCGTCTGGTGGTGGTCTATGGCGCACGTCCG	CDS	5	-25	No	Yes	Yes	Yes
	cpxP	ddlB	TTTCCTTGCCATAGACACCATCCCTGTCTTCCCCCACATGC	TGGATAAACTACGCAGCAAACTTCTATGGCAAGGTGCCGG	CDS	3	-22.8	No	No	Yes	No
	cpxP	tpiA	TCCCTGTCTTCCCCCACATG	GGCACAGGCTGTTCACAAATTCATCCGTGACCACATCGCTAAA	CDS	1	-7.4	No	No	No	Yes
	cpxP	wzzE	ACACCATCCCTGTCTTCCCCCACAT	ATTACAAACAGCGGATGGTGGGCAAC	CDS	6	-20.1	No	No	Yes	Yes
	cpxP	ampD	TTCCTTGCCATAGACACCATCCCTGTCTTCCCCCACATGCTGTGGGGGTTTTTTTTAT	TGTTGTTAGAACAGGGGTGGCTGGTTGGC	CDS	1	-25.3	No	No	No	Yes
	cpxP	ydcZ	CACCATCCCTGTCTTCCCCCACAT	TTTAATCAGAGGATGGTGCC	CDS	1	-17.2	No	No	No	Yes
	cpxP	ybjL	TTTTCCTTGCCATAGACACCATCCCTGTCTTCCCCCACATGCTGTGGGGGTTTTTTTT	ATGGTGAAAGAGTTCGGCTTGATGGTGTTTATGGCAGGCGTTGG	CDS	55	-36.5	No	Yes	Yes	Yes
	cpxP	grpE	TTTTCCTTGCCATAGACACCATCCCTGTCTTCCCCCACA	GCAGAAGGGTTATACGCTGAATGGTCGTACGATTCGTGCGGCGATGGT	CDS	1	-15.9	No	No	No	Yes
	cpxP	flhA	TTCCTTGCCATAGACACCATCCCTGTCTTCCCC	CAGTGGTTTCCTGGCAA	CDS	1	-14	No	No	No	Yes
	cpxP	yidC	CACCATCCCTGTCTTCCCCCACATG	CTGACCATCAACACCCGTGGTGGTGATGTTG	CDS	1	-10.6	No	No	Yes	No
	cpxP	gadB	TTTTCCTTGCCATAGACACCATCCCTGTCTTCCCCCACAT	CATTAACAAAAACTGGATCGACAAAGAAGAATATCCGCAATCCGCAGCC	CDS	1	-9	No	No	No	Yes
	cpxP	yciQ	TTTCCTTGCCATAGACACCATCCCTGTCTTCCCCCACATG	ATTCCGGTGGTGGTGCTGGCGGCGGCGCGGGTGGCGGAGGCGGTGGTG	CDS	6	-31.8	No	No	No	Yes
	cpxP	ycfZ	TTTCCTTGCCATAGACACCATCCCTGTCTTCCCCCACATGC	TGCGATTACCAGAATATCGCCACTCTGGGCAGGGCTAATTGGTGTCTGTACG	CDS	2	-26.8	No	No	Yes	No
	cpxP	fucO	TTCCTTGCCATAGACACCATCCCTGTCTTCCCCCACATGCT	TTAGGGTTGGTGCATGGTAT	CDS	3	-22.8	No	No	Yes	No
	cpxP	dinB	ACACCATCCCTGTCTTCCCCCACAT	ATGCCGACAGGGATGGCGCTC	CDS	1	-23.1	No	No	Yes	No
	cpxP	rppH	TTTTCCTTGCCATAGACACCATCCCTGTCTTCCCCCACATG	TCAGACAGGTGGTGTCATTTAAAC	CDS	2	-22.7	No	No	Yes	No
	cpxP	aas	TTTCCTTGCCATAGACACCATCCCTGTCTTCCCCCACAT	CAAAATTGCAGGCGAAATGGTGTCGCTGGAA	CDS	1	-23.6	No	No	Yes	No
	cpxP	dsbE	CCTTGCCATAGACACCATCCCTG	ATCTCGGTGTCTATGGCGCGC	CDS	1	-24.5	No	Yes	No	No
	cpxP	yeaP	TTTCCTTGCCATAGACACCATCCCTGTCTTCCCCCACATGC	TTCACTTACCGGATGGATCATTCTATGGCACGCT	CDS	5	-22.6	No	No	Yes	Yes
	cpxP	ycaM	GTTTTCCTTGCCATAGACACCATCCCTGTCTTCCCCCACATGCTG	TTTACCGATGCCCCTTTAATTTTGGCGAAGGATTTGTCTATGGCTGGGAATGTTCAGGAAAAACAGTTGCGATGGT	CDS	49	-30.5	Yes	Yes	Yes	Yes
	cpxP	waaS	TTTCCTTGCCATAGACACCATCCCTGTCTTCCCCCACATGCTGTGGGGGTTTTTTTTAT	TAATAAAAAAATATCAAAAATAGGGATGGATAATGCATGGCTGGGGCGATT	CDS	55	-29.3	Yes	Yes	Yes	Yes
	cpxP	purL	CACCATCCCTGTCTTCCCCCACAT	TTGCAGGGGATGGTGGGC	CDS	6	-19.9	No	No	Yes	Yes
	cpxP	glpT	TTTTCCTTGCCATAGACACCATCCCTGTCTTCCCCCACAT	CTTCTTCGGCTGGGATGGCGGCTTTATGGTAATG	CDS	7	-28.1	Yes	Yes	No	Yes
	cpxP	yahC	GACACCATCCCTGTCTTCCCCCACAT	ATTATTCCGGGATGGTGTGGGCGTTTT	CDS	2	-20	No	No	Yes	No
	cpxP	sapA	TTGCCATAGACACCATCCCTGTCTTCCCCCACATG	ATGACAACGAGGCTAAAATTACT	CDS	1	-6.8	No	No	Yes	No
	cpxP	yfhM	TTTCCTTGCCATAGACACC	TTACTATTGGCAAGGAGGTCAAAGCACT	CDS	2	-18.5	Yes	No	Yes	No
	cpxP	proP	TTTTCCTTGCCATAGACACCATCCCTGTCTTCCCCCACATGCTGTGGGGGTTTTTTTTATC	AAAGCCATTACCGCAGCATCACTGGGTAATGCAATGGAATGGTTCGATTTTGGTGTTTATGGTTTTGTTGC	CDS	25	-44.5	Yes	Yes	Yes	Yes
	cpxP	srlA	CACCATCCCTGTCTTCCCCCACAT	TTACCGGGATGGTGACCGG	CDS	2	-18.5	Yes	No	Yes	No
	cpxP	rplB	TTGCCATAGACACCATCCCTGTCTTCCCCCACATGC	AAAGGCCTGAAAGCTGGCGACCAGATTCAGTCTGGCGTTGATGCTGCAATC	CDS	1	-15	No	Yes	No	No
	cpxP	ilvL	CTTGCCATAGACACCATCCCTGTCTTCCCCCAC	TTATCCCACCGTGCGGGGCTGCACTTGGACGAGGA	CDS	1	-17	No	No	Yes	No
	cpxP	metB	AACCCTGTTTTCCTTGCCATAGAC	TGGCAAGGGAAGTCGGGGCGGTG	CDS	1	-27.4	No	No	Yes	No
	cpxP	clpA	GTTTTCCTTGCCATAGACACCATCCCTGTCTTCCCCCACAT	ATAAAAATTGGGGGAGGTGCCTATGCTCAATCAAGAA	CDS	33	-23.6	No	Yes	Yes	Yes
	cpxP	cof	TTTCCTTGCCATAGACACCATCCCTGTCTTCCCCCACA	CAGGCTGTCTCTCACTATTTGACGCACTGGCTGGACT	CDS	1	-13.6	No	Yes	No	No
	cpxP	wecF	TTTCCTTGCCATAGACACCATCCCTGTCTTCCCCCACAT	TTATGGTTGTTGGCAAGGACGACG	CDS	2	-20.7	No	No	Yes	No
	cpxP	malM	TCCCTGTCTTCCCCCACA	TCCACCTTTATCAGCAGTGTAAAAGGCAAGG	CDS	1	-9.6	No	No	No	Yes
	cpxP	ccmA	TTTTCCTTGCCATAGACACCATCCCTGTCTTCCCCCACATG	TGACGCAGGCGAGGTTCTCTGGCAAGGGCA	CDS	1	-30.3	No	No	Yes	No
	cpxP	glgX	TTTCCTTGCCATAGACACCATCCCTGTCTTCCCCCACATGCTGTGGGGGTTTTTTT	TAACCCAGTGATTACGGCTGTCTGGCAGGGACCTGCACACGGATTGT	CDS	5	-28.3	No	No	Yes	No
	cpxP	ygcB	TTTTCCTTGCCATAGACACCATCCC	AGAATCTGGATGGATGGGTCTGGCAGGGTAA	CDS	2	-27.3	No	No	No	Yes
	cpxP	flgE	TTCCTTGCCATAGACACCATCCCTGTCTTCCCCCACAT	TTAGTGGATGGTGCGATGGCGA	CDS	2	-25.7	Yes	No	Yes	No
	cpxP	tehA	TCCTTGCCATAGACACCATCCCTGTCTTCCCCCACATGC	TTGTGTTGGGGACGATAGGGATGGGATTTGC	CDS	2	-37.3	Yes	No	Yes	No
	cpxP	dfp	CCATAGACACCATCCCTGTCTTCCCCCACATGC	AAAAAGCAGGCCACGCAGGGTGATG	CDS	1	-12.7	No	No	No	Yes
	cpxP	yihX	CCTGTCTTCCCCCACAT	TTTCATATGGGGGAGGCG	CDS	1	-17.5	No	No	No	Yes
	cpxP	mlaA	ACCATCCCTGTCTTCCCCCACAT	ATGTTGCAGGGATGGCGAACCC	CDS	1	-19.2	Yes	Yes	No	No
	cpxP	ybhN	ACACCATCCCTGTCTTCCCCCACATGCT	CATATTCCGGCGGGGATCGGTGTGCT	CDS	8	-23.2	No	No	No	Yes
	cpxP	mcrA	TTTCCTTGCCATAGACACCATCCCTGTCTTCCCCCACAT	GAAGAGGATGGTGTTTATGGTC	CDS	3	-31.7	Yes	No	No	Yes
	cpxP	katE	TTTCCTTGCCATAGACACCATCCCTGTCTTCCCCCACATGCTGTGGGGGTTTTTTTTATC	TCAGGGTGGTGCTGGCTCTG	CDS	1	-21.8	No	No	No	Yes
	cpxP	serA	GTTTTCCTTGCCATAGACACCATCCCTGTCTTCCCCCACATGC	GGATGCAAATCCGCACACAACATTTCAAAAGACAGGATTGGGTAAATGGCAAAGGTATCGCTGGAGAAAGACAAGATTAAGTTTCTGCTGGTAGAAGGC	CDS	15	-32.1	Yes	Yes	Yes	Yes
	cpxP	setA	TTTCCTTGCCATAGACACCATCCCTGTCTTCCCCCACAT	ATTGGGATGCTATGGTTTCAGGA	CDS	3	-21.9	No	Yes	No	No
	cpxP	infC	TTTTCCTTGCCATAGACACCATCCCTGTCTTCCCCCACATGCTGT	AGCCTGATTCGCTTTCTCGAA	CDS	1	-3.6	No	Yes	No	No
	cpxP	waaQ	TTTCCTTGCCATAGACACCATCCCTGTCTTCCCCCACA	TAAAGGTGCGGGAACTTTCGATAAAATT	CDS	1	-11.8	No	Yes	No	No
	cpxP	wzzE	GACACCATCCCTGTCTTCCCCCACAT	TCGGGGCTGGTGTCGCATT	CDS	1	-21.5	No	No	Yes	No
	cpxP	cho	TTCCTTGCCATAGACACCATCCCTGTCTTCCCCCACAT	TTGCGGGTGGTGTGTTGGCCTTGGCAAGGGGC	CDS	5	-29.2	No	No	Yes	Yes
	cpxP	ycjW	TTCCTTGCCATAGACACCATCCCTGTCTTCCCCCACAT	ATATTCCGGTGGTGGTGATTGGCAAA	CDS	1	-21.7	No	No	No	Yes
	cpxP	dapA	TTCCTTGCCATAGACACCATCCCTGTCTTCCCCCACATG	ATTGTCGCGATTGTTACTCCGATGGATGA	CDS	1	-8.2	No	No	No	Yes
	cpxP	nusG	TTTCCTTGCCATAGACACCATCCCTGTCTTCCCCCACATGC	TTGTTTGGTGAAGTCATGGTACCAACCGAAGAAGTGGT	CDS	4	-14.4	No	No	No	Yes
	cpxP	ybgI	AGACACCATCCCTGTCTTCCCCCACATGC	TTTTATCGATAGCGCCGCGCGTT	CDS	1	-5.4	No	No	No	Yes
	cpxP	gnd	TTTTCCTTGCCATAGACAC	ACAGCTACCGTGCTGCTGTTCTGCCTGCGAACCTGATCCAGGCACAGCGT	CDS	1	-6.4	No	No	No	Yes
	cpxP	cstA	CACCATCCCTGTCTTCCCCCACAT	TGCTGGCAGGGATGGCGCTG	CDS	1	-21.9	No	No	Yes	No
	cpxP	phoP	TCCCTGTCTTCCCCCACATGC	CACTATTTTAATAATTAAGACAGGGAGAAATAAAAATG	CDS	4	-17	No	No	Yes	Yes
	cpxP	lsrR	TTCCTTGCCATAGACACCATCCCTGTCTTCCCCCACAT	CGGGTTGGCGTGGCAGGGG	CDS	2	-23.3	Yes	No	No	Yes
	cpxP	aceK	CCTTGCCATAGACACCATCCCTGTCTTC	CGTTGGTCTGGTCGTGGAGCAACTGCGCTGCATTACTA	CDS	1	-10.6	No	No	No	Yes
	cpxP	tnaA	TTTTCCTTGCCATAGACACCATCCCTGTCTTCCCCCACATG	TAAATCCGGTATGAACCCGTTCCTGCTGGATAGCGAAGATGT	CDS	1	-12.1	No	No	Yes	No
	cpxP	ynbD	TTTCCTTGCCATAGACACCATCCCTGTCTTCCCCCACAT	TCGGGATGTGGCTGTCTATGCGTTGGTTTTGTCGTCGCCTGGAGCCGGTGAGCA	CDS	1	-23.6	No	No	No	Yes
	cpxP	mioC	TTTCCTTGCCATAGACACCATCCCTGTCTTCCCCCACATGCT	ACTCTTAATAAAGGTGGCGGTTTATGGCAGATATCACTCTTATCAGCGGCAGCACCCTCGGCGGTGCCGAATAT	CDS	15	-22.6	Yes	No	Yes	Yes
	cpxP	ygcQ	TTCCTTGCCATAGACACCATCCCTGTCTTCCCCCACAT	CATTAGCTGAGGCCAGACGGGTGCTGGTGGTGGGGCAGG	CDS	1	-31.4	No	Yes	No	No
	cpxP	zitB	TTTTCCTTGCCATAGACACCATCCCTGTCTTCCCCCACATGCTGTGGGGGTTTTTTT	AAAGTTAAGTGAGAATAATTAAGGGATGACTCGTCATGGCGCA	CDS	27	-24.7	Yes	Yes	Yes	Yes
	cpxP	ybjI	TAGACACCATCCCTGTCTTCCCCCACAT	ATTGCGGTAGACATGGATGGTACTTTC	CDS	5	-21.4	No	No	Yes	No
	cpxP	phnP	TTCCTTGCCATAGACACCATCCCTGTCTTCCCCCAC	TTTGAGGTGGGGTTTGATGGGATGGAGATTGG	CDS	5	-27.4	No	No	No	Yes
	cpxP	patD	TAGACACCATCCCTGTCTTCCCCCACAT	AAGTGCGGATGGTGTCGCTGACG	CDS	1	-19.5	No	No	No	Yes
	cpxP	ridA	TTTTCCTTGCCATAGACACCATCCCTGTCTTCCCCCACAT	TAAATCCGAAAACGGGCGAAGTACCGGCAGACGTCGCTGC	CDS	1	-15.7	No	No	Yes	No
	cpxP	prc	TTTTCCTTGCCATAGACACCATCCCTGTCTTCCCCCACAT	AGCGAAGATGTTTTCTCGCTGGCAATGACGGCGTTTGCGCGTGAAATC	CDS	1	-15.4	No	No	Yes	No
	cpxP	gcd	TGTTTTCCTTGCCATAGACACCATCCCTGTCTTCCCCCACATGCTGTGGGGGTTTTTTTTA	ATTGCTACTAAAATATTAATGAATTGAAATGGTGTCTCTTTATGGCAATTAACA	CDS	146	-25.8	Yes	Yes	Yes	Yes
	cpxP	yicL	TCCCTGTCTTCCCCCACATGCTGTGGGGGTTTTTTT	CGTTCTGATTGCCGCCGTGTTGTGGGGAAGTTCAGGGGTCTG	CDS	4	-36	No	No	Yes	Yes
	cpxP	aroB	TTTCCTTGCCATAGACACCATCCCTGTCTTCCCCCACAT	CTGCGGGTATGGTGATGGC	CDS	3	-21	No	No	No	Yes
	cpxP	yhhN	TTTTCCTTGCCATAGACACCATCCCTGTCTTCCCCCACATG	ATGACGCTGGTGATGGTG	CDS	1	-16.3	No	No	Yes	No
	cpxP	cybB	TTTTCCTTGCCATAGACACCATCCCTGTCTTCCCCCACATGCTGTG	ACTGGCTGGTCTTTTTACTGGTTATCGCAGCG	CDS	1	-11.1	No	No	Yes	No
	cpxP	paaJ	TTTTCCTTGCCATAGACACC	CTCAGGCATTCTGGCTGAGGAGATTGTTCCGGTTGTGTTGAAAAAC	CDS	1	-13.9	No	No	Yes	No
	cpxP	mutL	TTTTCCTTGCCATAGACACC	CACTTTTATCCTTGCCA	CDS	1	-1	No	No	Yes	No
	cpxP	ypdA	TTTCCTTGCCATAGACACCATCCCTGTCTTCCCCCACATG	AGACGATGAGCAAATCGATATCAAAAAAGA	CDS	1	-7.1	No	No	Yes	No
	cpxP	nlpD	TTTCCTTGCCATAGACACCATCCCTGTCTTCCCCCACA	GGGGGGCAACAAGGGGATTGATATCG	CDS	26	-20.9	No	No	No	Yes
	cpxP	rpmJ	CCATAGACACCATCCCTGTCTTCCCCCACAT	TAAGCGTGATGGTGTCATCCGT	CDS	1	-16.9	No	No	No	Yes
	cpxP	rcnA	GACACCATCCCTGTCTTCCCCCACATG	ATTGCCTTTGGCGGGATGGTGA	CDS	1	-20.6	No	No	No	Yes
	cpxP	cohE	TTCCTTGCCATAGACACCATCCCTGTCTTCCCCCACAT	TAACGCCAGAAAACTGAGAGATGGTGTTGGCGGGAA	CDS	6	-25	Yes	No	No	Yes
	cpxP	ybaT	TTTCCTTGCCATAGACACCATCCCTGTCTTCCCCCACATG	TCGGCATTGGGGCAATGGTGGGGGCGGGGATCTTCG	CDS	5	-28.4	No	No	No	Yes
	cpxP	emrA	TTTCCTTGCCATAGACACCATCCCTGTCTTCCCCCACAT	TTCGAAGAAACCGATGACGCATACGTGGCAGGGAATCAAATT	CDS	1	-25.4	Yes	No	No	Yes
	cpxP	uvrY	TTTTCCTTGCCATAGACACCATCCCTGTCTTCCCCCACATGC	TATTCCTTTGATCAACGTTCTACTTGTTGATGACCACGAA	CDS	1	-4.5	No	No	Yes	No
	cpxP	narX	GACACCATCCCTGTCTTCCCCCACATGC	TGGACTGGCAGGGATGGCGGTTT	CDS	1	-25.9	No	No	No	Yes
	cpxP	feaB	GACACCATCCCTGTCTTCCCCCACAT	AGCGATCGCTTACAGGCAGGGACGGTGTGGGTAAACA	CDS	4	-24.6	Yes	No	Yes	Yes
	cpxP	cptA	TTTTCCTTGCCATAGACACC	CGCACAGTGGCTTTCCTTG	CDS	1	-7.8	No	No	No	Yes
	cpxP	galS	TTTCCTTGCCATAGACACCATCCCTGTCTTCCCCCACATG	CGCGTCAGGCTGGCGTCTCTGTGGCAACGGTTTC	CDS	5	-26.6	No	No	No	Yes
	cpxP	yihF	AACCCTGTTTTCCTTGCCATAGACACCATCCCTGTCTTCCCCCACAT	AGCCGTAATCTGGGGTGGTGGCACATGGTACACAGGTACGCAAATTCAGCCTGGTGTCGAAAAATTTATTAAAGATTTTAACGATGCTAAAAAGAA	CDS	3	-28.2	No	No	No	Yes
	cpxP	yjcC	TTTTCCTTGCCATAGACACCATCCCTGTCTTCCCCCACATGCT	CTATTGCCAGGGATGGTTCTTTGC	CDS	3	-21.7	No	No	Yes	Yes
	cpxP	lexA	TCCTTGCCATAGACACCATCCCTGTCTTCCCCCACATG	TTATGGATGGTGACTTGCTGGCAGTGC	CDS	4	-22.6	Yes	No	Yes	Yes
	cpxP	pnuC	TCCCTGTCTTCCCCCACATG	TTACGCTTTGGGGGAAAGATGGATTTTTTTAGTGTGCA	CDS	1	-20.1	No	No	No	Yes
	cpxP	ycfL	TTTTCCTTGCCATAGACACCATCCCTGTCTTCCCCCACATGCTGTGGGGGTTTTTTT	ATGCTTTGGGCTGGTGTCTCTGGTGTTGTTA	CDS	131	-25.2	No	Yes	Yes	Yes
	cpxP	gatB	TTCCTTGCCATAGACACCATCCCTGTCTTCCCCCACAT	ATTCTGACTATCTTACAGGGGTGACCTAT	CDS	10	-15.4	Yes	No	Yes	No
	cpxP	ytjA	TTCCTTGCCATAGACACCATCCCTGTCTTCCCCCACAT	TGGGTTTGGTGGTCTGGC	CDS	1	-17.6	Yes	No	No	Yes
	cpxP	nanA	TTTCCTTGCCATAGACAC	TCAGAGGTATTTATGGCAACGAATT	CDS	2	-14.7	Yes	Yes	No	No
	cpxP	psuT	TTTCCTTGCCATAGACACCATCCCTGTCTTCCCCCACATGCTGTGGGGGTTTTTTTT	TGTTGTGGGGATGGTGGTGTTACTGGCAATAGCATTTCTGTTGTCAGTGAA	CDS	4	-33.1	No	No	No	Yes
	cpxP	glpK	TTTCCTTGCCATAGACACCATCCCTGTCTTCCCCCACA	AAGGTGCGGTGTTTATGGCAGGCG	CDS	1	-28.6	Yes	Yes	No	No
	cpxP	astD	TTTCCTTGCCATAGACACCATCCCTGTCTTCCCCCACAT	TATCGGGCGAGGTGTTATGGCAAGGCAATGATGCCGATGCCGCTCAGGTCGAGCAGGCTTGTCGGGCAGCCCGTGC	CDS	6	-30.7	No	No	Yes	Yes
	cpxP	pqiC	TGCCATAGACACCATCCCTGTCTTCCCCCACATGCTGTGGGGGTT	ATCTGGCGGGGAATGGTGTGGT	CDS	2	-24.2	Yes	Yes	No	Yes
	cpxP	bamB	TTTCCTTGCCATAGACACCATCCCTGTCTTCCCCCACATGCTGTGGGGGTTTTTTTTA	TACCAGCGATGGTACTGTGGCATGGCAAAC	CDS	6	-27.1	Yes	No	Yes	No
	cpxP	malK	TCCTTGCCATAGACACCATCCCTGTCTTCCCCCACAT	TCATGAATGTTGCTGTCGATGACAGGTTGTTACAAAGGGAGAAGGGCATGGCGAGCGTAC	CDS	1	-22.7	No	No	Yes	No
	cpxP	inaA	TTCCTTGCCATAGACACCATCCCTGTCTTCCCCCACATGCTGTGGGGGTTTTTTT	TTGTCGTTAATAAAAATGACAGGCGATAGGGTATGGCAGTTTCAGCAAAGTACGACGAATTTAATCACTGGTGGGCAACAGAGGG	CDS	2	-24.6	No	No	Yes	No
	cpxP	dtpB	TTTCCTTGCCATAGACACCATCCCTGTCTTCCCCCACAT	TGCTGTTGATGGTGCCGTGGCTGAAAC	CDS	2	-20.4	Yes	Yes	No	No
	cpxP	tolB	GACACCATCCCTGTCTTCCCCCACA	ATCTACAGCTCTTCTCAGGGGATGGGATCC	CDS	2	-16.8	Yes	No	No	Yes
	cpxP	dapB	TGTTTTCCTTGCCATAGACACCATCCCTGTCTTCCCCCACATGCTGTGGGGGTTTTTTTT	TTGCTAACGGCGCGGTAAGATCGGCTTTGTGGTTGAGTGGTAAGGAAAGCGGTCTTTT	CDS	57	-40.6	Yes	Yes	Yes	Yes
	cpxP	fabA	TTTCCTTGCCATAGACACCATCCCTGTCTTCCCCCA	CTTCAATAAAATAAGGCTTACAGAGAACATGGTAGATAAACG	CDS	1	-10.2	No	Yes	No	No
	cpxP	yibA	TTTCCTTGCCATAGACACCATCCCTGTCTTCCCCCACA	TTTTATCTGTTTTATGCGATGAG	CDS	1	-8	No	Yes	Yes	No
	cpxP	kdpD	AGACACCATCCCTGTCTTCCCCCACAT	ACAAATTCAGGGATGCGTGGTTG	CDS	6	-18.4	No	No	Yes	Yes
	cpxP	otsB	TTTCCTTGCCATAGACACCATCCCTGTCTTCCCCCACAT	CGCAAGTGATGGTGCATTGGCATTGAT	CDS	5	-22.8	Yes	No	No	Yes
	cpxP	dmsC	TTCCTTGCCATAGACACCATCCCTGTCTTCCCCCACAT	ATATGACCGTGGGGATGGCCGTCGCAAG	CDS	3	-23.7	No	No	No	Yes
	cpxP	ptsI	TTTTCCTTGCCATAGACACCATCCCTGTCTTCCCCCACATGCTGTGGGGGTTTTTTTT	CGTGCTACACTTCTGTTGCTGGGGATGGGTCTGGACGAATTCTCTATGAGCGCCATTTCTATCCCGCGCATTAAGAAGAT	CDS	68	-27.7	No	Yes	Yes	Yes
	cpxP	gadA	TTTCCTTGCCATAGACACCATCCCTGTCTTCCCCCACATGCTG	TGTATGCTCGGCGGGATGGCGATGAAATGGCGTTGGCG	CDS	11	-28.4	No	No	Yes	Yes
	cpxP	pcm	TTTCCTTGCCATAGACACCATCCCTGTCTTCCCCCACATGCTGT	CCGTCATGGCGATGGATGGCAAGGTTGGCAGGCACGTGCG	CDS	4	-24.5	Yes	Yes	No	No
	cpxP	ydcC	TTTCCTTGCCATAGACACCATCCCTGTCTTCCCCCACAT	TTTTCAGGGATACGGCA	CDS	1	-13.1	No	No	No	Yes
	cpxP	yhhI	TTTCCTTGCCATAGACACCATCCCTGTCTTCCCCCACAT	TTTTCAGGGATACGGCA	CDS	1	-13.1	No	No	No	Yes
	cpxP	hdeD	TTCCTTGCCATAGACACCATCCCTGTCTTCCCCCACAT	AGGGGATTTTCTTCTTAATTTTATAGGGTGGTTCTATGTTAT	CDS	3	-26.5	Yes	No	No	Yes
	cpxP	insA_5	ACACCATCCCTGTCTTCCCCCACAT	TTCTATCAGCTGTCCCTCCTGTTCAGCTACTGACGGGGTGGTGCGT	CDS	1	-21	No	No	Yes	No
	cpxP	rpmI	CTTCCCCCACATGCTGTGG	TAATCGCGTGCCTGCCGTACGCATAAGCCGTTAACGTTTTTAACTTTTTAATTAGAATA	CDS	1	-6.7	No	No	No	Yes
	cpxP	araH	TTTCCTTGCCATAGACACCATCCCTGTCTTCCCCCACATGCTGTGGGGGTT	CAATTTCCATGTCGGGGATGGTGGCTTGTGGCATGTTGT	CDS	6	-37.7	No	No	No	Yes
	cpxP	feaR	CACCATCCCTGTCTTCCCCCACAT	ATGAATAATCCGGCACTTTCTGAAACAGAAAGTGAAGCTGCGCTACAGGCGATGGTGTGTC	CDS	1	-20	No	No	Yes	No
	cpxP	fimA	TAGACACCATCCCTGTCTTCCCCCACATG	GGTTCAGGGACGTCATTACGGGCAGGGATGCCCACCCT	3UTR	1	-23.7	No	No	No	Yes
	cpxP	rplA	TTTCCTTGCCATAGACACCATCCCTGTCTTCCCCCACAT	TATTCGGGTTGTGGCAAGGCGGC	3UTR	5	-19.6	No	Yes	Yes	No
	cpxP	malM	GCTGTGGGGGTTTTTTTTA	TACGCCCCACAGTGCTGATTTTGCAACAACTGGTGCGTCTCCTGGCGCACCTTTTTTT	3UTR	9	-18.7	No	No	Yes	Yes
	cpxP	rpoE	TTCCTTGCCATAGACACCATCCCTGTCTTCCCCCACATG	CAAATTGCAGCTAATGGAGTGG	5UTR	1	-7.8	No	No	No	Yes
	cpxP	cfa	CATCCCTGTCTTCCCCCAC	TCACTATGGATAGTCATTTCGGCAAGGGTTCCT	5UTR	17	-9	Yes	No	Yes	Yes
	cpxP	rpoE	TTTCCTTGCCATAGACACCATCCCTGTCTTCCCCCACAT	AGATTCTGTAGACTTATAATGATAGATAATGATCCGTCTACAGCAT	5UTR	1	-13.5	No	Yes	No	No
	cpxP	opgC	TTTCCTTGCCATAGACACCATCCCTGTCTTCCCCCACAT	CTGCGCCTGGCGCGGTCAGGTCGGTGTCACTATGGCAACAA	5UTR	1	-30	No	Yes	No	No
	cpxP	cfa	GACACCATCCCTGTCTTCCCCCACATGC	TACGATAAATATTATGTTTTTACGGGGACAGGATCGTTCCCGACTCACTATGGATAGTCATTTCGGCAAGGGTTCCTC	5UTR	8	-18	Yes	No	Yes	Yes
	cpxP	cbrC	TTCCTTGCCATAGACACCATCCCTGTCTTCCCCCACA	CTCAAAAGCAGACAGGATGTTTC	5UTR	1	-13	No	No	No	Yes
	cpxP	rpmE	TTTCCTTGCCATAGACACCATCCCTGTCTTCCCCCACATGCT	TTGAAGCTATACTTTTAACATCGCGTGGTGTCTGGCGTTAGGGC	5UTR	1	-22.7	No	No	Yes	Yes
	cpxP	kgtP	TTTCCTTGCCATAGACACCATC	CATCGGATTACGGCAGGAGACAT	5UTR	1	-13.1	Yes	No	No	Yes
	cpxP	ppc	TTTTCCTTGCCATAGACACCATCCCTGTCTTCCCCCACATGC	GCGACGTGAAGGATACAGGGCTATCAAACGATAAGATGGGGTGTCTGGGGTA	5UTR	9	-31.7	No	Yes	Yes	No
	cpxP	ytfK	TTTTCCTTGCCATAGACACCATCCCTGTCTTCCCCCACATGC	AATAGTTGGGCCGATTGTGGCACCGCACAGGCGTAATACTCAGC	5UTR	2	-14.2	No	No	No	Yes
	cpxP	cysM	GTTTTCCTTGCCATAGACACCATCCCTGTCTTCCCCCACA	AGGTTGAGTGAATGTTAAACGCCCGGAGGCGCTTCCCGCGATCCGGGCTTTTTAATGGCAAGGTTTG	5UTR	4	-22.3	No	No	Yes	No
	cpxP	glmS	ATCCCTGTCTTCCCCCACATG	TGGGATGAGGAGATAACATAATCTCCCTCCCA	5UTR	1	-11.5	No	No	Yes	No
	cpxP	hupB	TTTTCCTTGCCATAGACACCATCCCTGTCTTCCCCCACATGCTGTGGGGGTTTTTTTTA	ATTAAGGGGTGTTGTAAGGGGATGGCTGGCCTGATATAACT	5UTR	51	-27.1	Yes	Yes	Yes	Yes
	cpxP	ompX	TTTTCCTTGCCATAGACACCATCCCTGTCTTCCCCCACAT	TTAGTCTGGTGATTAGGAATAATCTGGATGAATGACAGGGAAAACATGC	5UTR	1	-20.1	No	No	No	Yes
	cpxP	csgD	TTTTCCTTGCCATAGACACCATCCCTGTCTTCCCCCACAT	TGATTTATTACTACACACAGC	5UTR	1	-3.1	No	No	Yes	No
	cpxP	slyB	CCCTGTTTTCCTTGCCATAGACACCATCCCTGTCTTCCCCCACAT	TGGATTCACATATGCCATATACTTTGACCATGAGGGATGCTTGCGTGGCGTTTCATGGTGAACAGGAGATT	5UTR	2	-30.8	No	No	Yes	No
	cpxP	iscR	CTGTGGGGGTTTTTTTT	GCTATGCAATACCCCCACTTTTACAATAA	5UTR	2	-16.8	No	Yes	No	No
	cpxP	ygjP	TTTCCTTGCCATAGACACC	CTTTTTCTCTTTTTCGT	5UTR	1	-0.6	No	No	No	Yes
	cpxP	hupB	TTTCCTTGCCATAGACACCATCCCTGTCTTCCCCCACATGC	ATTAAGGGGTGTTGTAAGGGGATGGCTGGCCTGATATAACT	5UTR	39	-27.1	Yes	Yes	Yes	Yes
	cpxP	yhiI	TTCCTTGCCATAGACACCATCCCTGTCTTCCCCCACAT	CTTACAGGGATTATGGCGGGT	5UTR	3	-23.2	No	No	Yes	No
	cpxP	yahO	TTTTCCTTGCCATAGACACCATCCCTGTCTTCCCCCACATGC	TGGGTGGGTGATAGTGTGATAACAACTCTGGAG	5UTR	1	-20.9	No	No	No	Yes
	cpxP	ynfB	TTTCCTTGCCATAGACACCATCCCTGTCTTCCCCCACAT	GCAGTGGATGGTGTAGAAT	5UTR	4	-21	No	No	Yes	No
	fimA	ahpC	CCCAGGTTCAGGGACGTCATTACGGGCAGGGATGCCCACCCT	TCCGTCTCTGGACCTGGTTGGTAAAATC	CDS	2	-28.5	No	No	No	Yes
	fimA	livJ	TTCAGGGACGTCATTACGGGCAGGGATGCCCACCC	TATGCTGCTAAAGCACGGGTAGTCATGCATAAAACGAAATAAAGTGCT	5UTR	1	-13.5	No	No	No	Yes
	hemG	ybaB	ACGCCGCCGGGTCAGCGGGGTTCTCCTGAGAACTCCGGCAGAGAAAGCAAAAATAAATGCT	AGCCTGCTGGAAGACGACAAAGAGATGCTGGAAGACCTGGTGGCTGCAGCATTCAACGACGCA	CDS	1	-45.4	No	Yes	No	No
	hemG	fumA	AACACGCCGCCGGGTCAGCG	ATTCTGCGTGACCCGGAGGCCAGCGAAAATG	CDS	1	-26	No	No	Yes	No
	hemG	mepS	ACTGACACGGAACAACGGCA	TCTGTTCCGTGCCGGTTCAAC	CDS	1	-18.8	No	Yes	No	No
	hemG	orn	CGCCGCCGGGTCAGCGGGGTTCTCCTGAGAACTCCGGCA	ACTTGCGGCGGCGTGATTTTGA	3UTR	1	-19.3	No	Yes	No	No
	ftsA	ypjD	ATTTTTATGAGGCCGACGATGATTACGGCCTCAGGCGACAGGCAC	TCGCGCTTGTCGCCTACTCCGT	CDS	1	-25.6	No	Yes	No	No
	ftsA	rpsU	TTTATGAGGCCGACGATGATTACGGCCTCAGGCG	TAATTAAAGTACGTGAAAACGAGCCGTTCGACGTAGCT	CDS	1	-15.7	No	No	Yes	No
	ftsA	rsmF	GATGATTACGGCCTCAGGCGACAGGCACA	AATGTTGCCTGTTGCCGCCTTGT	CDS	1	-25.3	No	No	No	Yes
	malM	purN	GCTGATTTTGCAACAACTGGTGCGTCTCCTGGCGCACCTTTTTT	ATTTACAGGCAATTATTGACGC	CDS	1	-10	No	No	No	Yes
	malM	yncE	CGCCCCACAGTGCTGATTTTGCAACAACTGGTGCGTCTCCTGGCGCACCTTTTTTT	GCATTGTGAAGCAGCAAAAATATCGGTTCATCAAAGGGAGTCGTCATGCATTTACGT	CDS	1	-18.8	No	No	No	Yes
	malM	wecA	ACGCCCCACAGTGCTGATTTTGCAACAACTGGTGCGTCTCCTGGCGCACCTTTTTT	ATGCATTGTGAATTTACTGACAGTGAGTACTGATCTCATCAGTATTTTTTTATTCACGACACTGTTTCTGTTT	CDS	1	-22.6	No	No	No	Yes
	malM	ybjN	ATTTTGCAACAACTGGTGCGTCTCCTGGCGCACCTTTTTT	TGGTGGTTTGCCAGTCTTTATCCGTTATGCAGGGCGTAACCTATGAGCAGTTTGCATGGTTCGTGCGTC	CDS	1	-24.6	No	No	Yes	No
	malM	murI	TGCTGATTTTGCAACAACTGGTGCGTCTCCTGGCGCACCTT	TCTTACCGGATCTCCATTACAT	CDS	1	-7.2	No	Yes	No	No
	malM	ibpA	CAGTGCTGATTTTGCAACAACTGGTGCGTCTCCTGGCGCACCTTTTTTTA	GTGGTGAAAGGTGCTCACGCCGACGAACAAAAAG	CDS	1	-21	No	No	Yes	No
	malM	aceK	ACGCCCCACAGTGCTGATTTTGCAACAACTGGTGCGTCTCCTGGCGCACCTTTTTTT	TTTCCCTGGCGACATGCTGTTTAAAAACTTCGGTGTCACCCGTCACGGGCGTGTGGTTTTTT	CDS	1	-26.6	No	No	Yes	No
	cspF	hspQ	ACAGACATGAGTCCCGGGATGAGATTCAACATTACCA	AAAGATTTCCCGGGAGGTGACT	CDS	20	-17.5	No	No	Yes	No
	fieF	wzyE	TAAAAGAGAGCCAGACCCGCATTTTGT	ACATCGACTTCCAGGGCCTGGCTCCAATTGTCC	CDS	5	-19.8	No	No	Yes	No
	marB	secM	ATCCAACAATAGTGCCGCACTTGCCAGTCC	TTCGACTGGCAAATCTGGCACTCTCTCCGGC	5UTR	3	-27	No	No	Yes	No
	tusB	hemG	CTTGACACCTTTTCGGCATCGCCCTAAAATTCGGCGTCCTCATATTGTGTGAGGACGTTTT	TTTAACCGACAAACCGACGCTGAAATAAGCATAAAGAATAAAAAATGC	CDS	1	-15	No	No	Yes	No
	folB	ypfG	TATAACCTGGTCATACGCAGTAGTTCGGACAAGCGGTACAT	CTTGTGCTGTTTGTTTGAACTTCTGGGGTCGTACCGTCCATGCGCTA	CDS	1	-36.6	No	Yes	No	No
	mntH	xapR	ATCCCAGCCACGGTGGTAGCCATTATCA	TCATCATTTTCCACCGTCCCGCTGGAAGC	CDS	1	-21.5	No	No	Yes	No
	ygfZ	mog	TCGCATCAGGCATTTATC	GCCCGATGCGACGCTGGC	CDS	1	-17.6	No	No	No	Yes
	dadX	ycdU	CTCTTCAGCCACCCGTACGCCAATCTT	TTTATTTTTGATCTCAAGGCGTACTGGGCTTATA	CDS	15	-18.7	No	No	Yes	No
	atpE	psd	ATCAGAACGTTAACTAAATAGAG	ATCTCACGGCTCAGAACG	CDS	1	-3.5	No	No	Yes	No
	yfaE	yihX	ACGATCTTCGGCACGAT	CTTTTTCGACGATAACG	CDS	1	-5.3	No	Yes	No	No
	yfaE	oppA	TAGTAATACGCTTTCAC	TAAAGTCGGTGATAGTAATACG	5UTR	1	-6.8	No	No	Yes	No
	yciX	nadA	ATGAAATATTGGTCCTGGATGGGCGCGTT	TGCGATGCCCATCCCGATCGTACTGT	CDS	7	-24.3	No	No	Yes	No
	ychJ	rpsR	TGGTTGACGGTACGGTTTAGCAAACACTCTCAACAAG	TAAAGATATCGCTACGCTGAAAAACTACATCACCGAA	CDS	1	-12.9	No	No	Yes	No
	ydhK	ydhK	CCGCCAACGTGGACCATCAGCGCTTTGT	GGTCTGATGGTCCAGATTA	CDS	1	-21.3	No	Yes	No	No
	hemN	ygdH	GCTGGGCAACAAAACCTGTTGAAATTATTGC	TGCGTCGTATGGACGACCTGCTACAGGGTTTTGTTGCCC	CDS	1	-24.5	No	No	No	Yes
	hemN	dtpB	AGATTGCCTGATGCGCTGGGCAACAAAACCTGTTGAAATTATTGCTTTT	AAACTTTTTCGCGCGTTATCCCTTACGCGTTCATACTTTTCAGGATGGTATTGGAA	5UTR	1	-15.2	No	No	No	Yes
	deoR	dnaK	TCGCTTTCAGGTTTTTCAGCTGCCCACGC	AATTGGGCAGTTGAAACCAGACGTTTCGC	5UTR	4	-24.3	No	No	Yes	No
	ahpF	aroE	AAGATTCACCTGCAATTGCTTAGCCGCCGGGGTCA	GTTATAAAGCAATTGCAGGAGGAATT	CDS	6	-25.2	No	No	Yes	No
	ahpF	clpA	GTAAGATTCACCTGCAATTGCTTAGCCGCCGGGGTCA	TTCTGTTGCAGGTGATGGATAAC	CDS	5	-18.2	No	Yes	No	No
	ahpF	yieF	TAAGATTCACCTGCAATTGCTTAGCCGCCGGGGTC	TGAAAAATTGCAGGTGGTTAC	CDS	1	-18.7	No	No	No	Yes
	ahpF	ybhQ	ATTCACCTGCAATTGCTTAGCCGCCGGGGTC	TTTTTGCTGGCAATTGCAGGGCTGG	CDS	5	-24.5	No	No	Yes	No
	yibB	pphA	TTTCCCTCCATTAGTGGGTAGCGTTTTGATACCAACTGAGATAGGAAAAATGATGCTTTGGCATCATTTTTTC	AAGAGCCATTTCCCTGGACCGAATACAGGAATCGTGTTCGGTCTCTTTT	5UTR	1	-16.8	No	No	No	Yes
	hns	yjiJ	CCGCCAGCGGCGGGATTTTT	TTTCTGTTGGCTTCTGCCCTGGCGAGCG	CDS	1	-23.5	No	No	Yes	No
	ymjA	katG	AATTGCAGACGATCGGTCAGTAT	GGAGCCAATTGCTGACG	CDS	1	-10.1	No	No	Yes	No
	bhsA	polB	TGCCTGCTACTGCTGATTTTTTCCCCGCGAC	TGGTTTTTTGATGGATTTTCAGCGTGGCGCAGGCAGGTTTTA	CDS	5	-25.1	No	No	Yes	No
	bhsA	matP	TAATGCCTGCTACTGCTGATTTTTTCCCCGCGACA	CTTCTCTGAAGCAGGATCTGCAGGCATTGCT	CDS	2	-23.3	No	No	No	Yes
	bhsA	ompF	TTAATGCCTGCTACTGCTGATTTTTTCCCCGCGACA	ATTGACAGAACTTATTGACGGCAGTGGCAGGTGTCATAAAAA	5UTR	1	-28.1	No	No	Yes	No
	bhsA	ompC	TTAACCCTCATTAATGCCTGCTACTGCTGATTTTTTCCCCGCGACATGCCG	GCCGACTGATTAATGAGGGTTAAT	5UTR	2	-21	No	No	Yes	Yes
	sfsA	opgH	TGTTACGTTTAGATAATTGCTATCCGGAAAAGCATCTGCTATTTATAGCGGCCTCATTTTTC	TGGCGTACCAACCCGGTAGGCCGTTTCTGGGATCGCCTGCGTGGACGCGATGTCACGCCGCGCT	CDS	1	-28.3	No	No	No	Yes
	sfsA	wcaN	CTGGTCGCGTGCGCAAATACGC	ATTTTGTGTGCGCGACCTGC	CDS	1	-26	No	No	No	Yes
	ydcH	ymiA	CTTTCCTAAGCCGCCAGCCAGGCGGCTTTT	TTAAAACGTAAAGCCTGGCTGGCGGTTTTTCTTG	CDS	1	-35.5	No	No	Yes	No
	ydcH	nlpD	GCCAGCCAGGCGGCTTTTTTA	ATTCACCGTTCGCCGCATTGCGGCTTTGTCACTGGTTTCGCTATGGCTGGCAGGCT	CDS	1	-23.9	No	No	Yes	No
