# Supplementary material for: Hfq CLASH uncovers sRNA-target interaction networks linked to nutrient availability adaptation
Source: eLife. 2020 May 1;9:e54655. doi: 10.7554/eLife.54655 (PMC7213987; doi:10.7554/eLife.54655)
Supplement: Supplementary file 7. — Chimeric reads were analyzed using a statistical pipeline described by Waters et al., 2017. Only chimeric reads that had a Benjami-Hochberg adjusted p-value (bh_adj_p_value) of 0.05 or less were considered. Shown are the sRNA-mRNA interactions that were experimentally validated, retrieved from sRNATarbase 3.0 (Wang et al., 2016) and recent literature (Bianco et al., 2019; Chao and Vogel, 2016; De Mets et al., 2019; Guo et al., 2014; Lalaouna et al., 2015b; Miyakoshi et al., 2018). Min. MFE indicates the minimal folding energies of the chimera, which was calculated using RNADuplex from the ViennaRNA package (Lorenz et al., 2011). The last three columns indicate in which growth phases the interactions were identified. [file elife-54655-supp7.xlsx]

## Sheet: Supplementary File 7
Supplementary File 7. Experimentally validated interactions in the statistically filtered Hfq CLASH data.
Chimeric reads were analyzed using a statistical pipeline described by [1]
Only chimeric reads that had a Benjami-Hochberg adjusted p-value (bh_adj_p_value) of 0.05 or less were considered
Shown are the sRNA-mRNA interactions that were experimentally validated, retrieved from sRNATarbase 3.0 [3] and recent literature [references 4-9]
Min. MFE indicates the minimal folding energies of the chimera, which was calculated using RNADuplex from the ViennaRNA package [2]
The last three columns indicate in which growth phases the interactions were identified.
	First fragment in chimera						Second fragment in chimera						Statistics				Min. MFE	Present in?
ID	rna_class	gene_id	gene_name	start	end	strand	rna_class	gene_id	gene_name	start	end	strand	p_value	bh_adj_p_value	total number of chimeras	Found in how many experiments?	ΔG (kcal/mol)	Exponential Phase	Transition Phase	Stationary Phase	Sources:
11074_357	5UTR	b1661	cfa	1741257	1741290	+	3UTR	b4484	cpxP**	4106348	4106367	+	0	0	17	1	-9	No	Yes	Yes	7
112236_21	ncRNA	b4577	sgrS	77366	77383	+	5UTR	b1101	ptsG	1157801	1157865	+	1.42963e-21	2.30442e-21	4	1	-19.7	No	Yes	No	3
120616_18	ncRNA	b4698	mgrR	1622833	1622860	-	protein_coding	b2832	ygdQ	2970399	2970437	+	0	0	1	1	-23.4	No	Yes	No	3
12484_193	5UTR	b1040	csgD	1103277	1103326	-	ncRNA	b4431	rprA	1770430	1770461	+	1.17669e-26	1.80129e-26	240	1	-29.8	Yes	Yes	Yes	3
135205_14	protein_coding	b1130	phoP	1190432	1190472	-	ncRNA	b4442	micA	2814801	2814879	+	0	0	15	1	-27.7	Yes	Yes	No	3					References:
13676_150	ncRNA	b4443	gcvB	2942824	2942859	+	protein_coding	b4208	cycA	4429834	4429867	+	0	0	11	1	-27.7	Yes	Yes	Yes	3
14150_372,493411_2	5UTR	b0721	sdhC	755108	755189	+	ncRNA	b3864	spf	4049898	4049987	+	0	0	64	2	-26.6	Yes	Yes	No	3		*SdhX 3'UTR derived sRNA [4,5]			[1] Waters, S. A. et al. Small RNA interactome of pathogenic E.~coli revealed through crosslinking of RNase E. EMBO J. e201694639 (2016).
158322_12	3UTR	b0729	sucD*	765114	765133	+	protein_coding	b2296	ackA	2413426	2413479	+	0	0	3	1	-18.2	Yes	No	No	4,5		**CpxQ 3'UTR derived sRNA [6]			[2] Lorenz, R. et al. ViennaRNA Package 2.0. Algorithms Mol. Biol. (2011). doi:10.1186/1748-7188-6-26
163262_6	ncRNA	b4443	gcvB	2942696	2942735	+	protein_coding	b3089	sstT	3239896	3239983	+	0	0	1	1	-23.2	Yes	No	No	3		***MicL 3'UTR derived sRNA [8]			[3] Wang J, Liu T, Zhao B, Lu Q, Wang Z, Cao Y, Li W. (2015) sRNATarBase 3.0: an updated database for sRNA-target interactions in bacteria. Nucleic Acids Res. 2016 Jan 4;44(D1):D248-53. doi: 10.1093/nar/gkv1127
176269_14	protein_coding	b1243	oppA	1301133	1301205	+	ncRNA	b4443	gcvB	2942696	2942843	+	0	0	40	1	-37.8	Yes	Yes	Yes	3					[4] De Mets, F., Van Melderen, L., & Gottesman, S. (2018). Regulation of acetate metabolism and coordination with the TCA cycle via a processed small RNA. Proceedings of the National Academy of Sciences. https://doi.org/10.1073/pnas.1815288116
180617_14	ncRNA	b4417	rybB	887995	888063	-	5UTR	b2215	ompC	2312781	2312817	-	0	0	8	1	-28.9	No	Yes	Yes	3					[5] Miyakoshi, M., Matera, G., Maki, K., Sone, Y., & Vogel, J. (2018). Functional expansion of a TCA cycle operon mRNA by a 3′ end-derived small RNA. Nucleic Acids Research. https://doi.org/10.1093/nar/gky1243
182285_14	5UTR	b1661	cfa	1741213	1741291	+	3UTR	b4484	cpxP**	4106343	4106371	+	0	0	8	1	-18	No	Yes	Yes	7					[6] Chao, Y., & Vogel, J. (2016). A 3’ UTR-Derived Small RNA Provides the Regulatory Noncoding Arm of the Inner Membrane Stress Response. Molecular Cell. https://doi.org/10.1016/j.molcel.2015.12.023
21692_26	ncRNA	b4698	mgrR	1622832	1622864	-	protein_coding	b3546	eptB	3710463	3710516	-	0	0	5	1	-22.6	Yes	No	No	3					[7] Bianco, C.M., Fröhlich, K.S., Vanderpool, C.K. (2019). Bacterial Cyclopropane Fatty Acid Synthase mRNA Is Targeted by Activating and Repressing Small RNAs.Journal of Bacteriology.doi: 10.1128/JB.00461-19
220397_1	protein_coding	b1677	lpp	1757435	1757452	+	3UTR	b1874	cutC***	1958496	1958519	-	0	0	1	1	-9.6	No	Yes	Yes	8					[8] Guo, M. S., Updegrove, T. B., Gogol, E. B., Shabalina, S. A., Gross, C. A., & Storz, G. (2014). MicL, a new σE-dependent sRNA, combats envelope stress by repressing synthesis of Lpp, the major outer membrane lipoprotein. Genes and Development. https://doi.org/10.1101/gad.243485.114
223161_12	ncRNA	b4585	chiX	507203	507287	+	protein_coding	b1738	chbB	1821229	1821303	-	0	0	60	1	-35.7	Yes	Yes	Yes	3					[9] Lalaouna, D., Morissette, A., Carrier,M-C., Massé, E. (2015). DsrA regulatory RNA represses both hns and rbsD mRNAs through distinct mechanisms in Escherichia coli. Molecular Microbiology. https://doi.org/10.1111/mmi.13129
234424_8	protein_coding	b1237	hns	1292899	1292931	-	ncRNA	b1954	dsrA	2025264	2025287	-	0	0	2	1	-20	Yes	No	No	3
241562_11	protein_coding	b1661	cfa	1741577	1741625	+	3UTR	b4484	cpxP**	4106330	4106369	+	1.47714e-155	3.57265e-155	3	1	-27.5	No	No	Yes	7
262780_7	ncRNA	b4443	gcvB	2942814	2942841	+	protein_coding	b3544	dppA	3707232	3707255	-	0	0	1	1	-19.7	Yes	No	No	3
27041_126	ncRNA	b1954	dsrA	2025239	2025303	-	protein_coding	b3748	rbsD	3933643	3933669	+	0	0	60	1	-22.6	Yes	Yes	Yes	9
284801_1	protein_coding	b0814	ompX	850533	850566	+	ncRNA	b4438	cyaR	2167113	2167139	+	0	0	1	1	-8	No	No	Yes	3
289117_10	ncRNA	b4443	gcvB	2942696	2942884	+	protein_coding	b3544	dppA	3707705	3707784	-	0	0	49	1	-47.4	Yes	Yes	Yes	3
31826_35	ncRNA	b1954	dsrA	2025219	2025310	-	protein_coding	b3748	rbsD	3933603	3933739	+	0	0	934	1	-40.5	Yes	Yes	Yes	9
323189_8	protein_coding	b0721	sdhC	755512	755559	+	ncRNA	b4451	ryhB	3580952	3581017	-	4.94554e-306	1.4314e-305	130	1	-38.6	Yes	Yes	Yes	3
337129_5	ncRNA	b4417	rybB	887977	888063	-	protein_coding	b0957	ompA	1020013	1020069	-	0	0	3	1	-34.6	Yes	Yes	No	3
368717_7	3UTR	b0729	sucD*	765050	765090	+	5UTR	b3942	katG	4133812	4133830	+	9.46487e-151	2.27163e-150	2	1	-24.1	No	No	Yes	4,5
399673_1	ncRNA	b4438	cyaR	2167113	2167146	+	protein_coding	b2687	luxS	2814721	2814757	-	0	0	1	1	-9.3	No	Yes	No	3
42543_33	5UTR	b0721	sdhC	755104	755136	+	ncRNA	b3864	spf	4049989	4050006	+	0	0	1	1	-9	No	No	Yes	3
451905_2	protein_coding	b0814	ompX	850433	850452	+	ncRNA	b4438	cyaR	2167150	2167179	+	0	0	1	1	-16.4	Yes	No	No	3
47068_25	ncRNA	b4443	gcvB	2942797	2942861	+	protein_coding	b4208	cycA	4429834	4429873	+	0	0	33	1	-34.9	Yes	Yes	Yes	3
484056_7	ncRNA	b4438	cyaR	2167154	2167176	+	protein_coding	b2687	luxS	2814730	2814772	-	0	0	1	1	-16.4	No	Yes	No	3
622967_3	protein_coding	b1677	lpp	1757387	1757460	+	3UTR	b1874	cutC***	1958458	1958520	-	0	0	14	1	-28.7	Yes	Yes	Yes	8
641338_2	ncRNA	b4442	micA	2814802	2814819	+	5UTR	b4312	fimB	4540920	4540953	+	3.02015e-103	6.6548e-103	1	1	-20.6	No	Yes	No	3
684492_1	5UTR	b1243	oppA	1301125	1301166	+	ncRNA	b4443	gcvB	2942768	2942816	+	0	0	2	1	-17.2	Yes	Yes	No	3
77460_23	ncRNA	b4585	chiX	507215	507288	+	protein_coding	b0681	chiP	708263	708360	+	0	0	59	1	-31.1	Yes	Yes	Yes	3
793690_2	5UTR	b0720	gltA	754548	754603	-	ncRNA	b3864	spf	4049899	4049916	+	6.18178e-261	1.6957e-260	2	1	-20.4	No	Yes	No	3
8595_73	5UTR	b1040	csgD	1103250	1103345	-	ncRNA	b4431	rprA	1770421	1770479	+	0	0	6746	1	-37.4	Yes	Yes	Yes	3
9468_85	5UTR	b0721	sdhC	754990	755041	+	ncRNA	b4451	ryhB	3580925	3580976	-	0	0	12	1	-29.5	No	Yes	Yes	3
