# Supplementary material for: Hfq CLASH uncovers sRNA-target interaction networks linked to nutrient availability adaptation
Source: eLife. 2020 May 1;9:e54655. doi: 10.7554/eLife.54655 (PMC7213987; doi:10.7554/eLife.54655)
Supplement: Supplementary file 8. — PyMotif from the pyCRAC package was used for these analyses. For the motif search analyses we first clustered overlapping chimeric fragments into a single contig. For the 5'UTR motif analyses we used 356 clusters. [file elife-54655-supp8.xlsx]

## Sheet: Supplementary File 8
Supplementary File 8. Motif analyses of chimeric fragments that mapped to 5' UTRs.
PyMotif from the pyCRAC package was used for these analyses.
For the motif search analyses we first clustered overlapping chimeric fragments into a single contig.
For the 5'UTR motif analyses we used 356 clusters.
# k-mer lengths:
#	min: 4
#	max: 8
# 356 intervals
# k-mer	Z-score
TTTTT	4.83
TTTT	4.81
GGAG	4.74
TTTTA	4.64
GGGA	4.47
CACAA	4.22
ATTTT	4.16
AGGA	4.15
TTTTTA	4.03
ATTT	4.02
ATAA	3.92
AGGGA	3.81
CACAACA	3.77
TTTA	3.75
ATTTTT	3.68
AATAA	3.67
CCCC	3.64
AAGGA	3.57
CACAAC	3.55
CAGGGA	3.53
AGGG	3.5
AACACA	3.5
AAATG	3.44
TTTTTT	3.43
GGGAG	3.43
TTTCA	3.31
TTTC	3.31
GCCCC	3.3
AGGGAT	3.3
TAATA	3.29
ACAGG	3.29
GAGG	3.26
CAGGG	3.26
GGGG	3.25
TTAT	3.25
TTTTAT	3.24
GGAGT	3.24
AGGAT	3.24
TAACA	3.22
GGGAT	3.22
CATTT	3.21
ACAAT	3.21
TCTTT	3.16
TCACGA	3.16
AGTTAA	3.16
AACACAA	3.16
TTTAT	3.13
CTTTT	3.1
GATTT	3.05
GTTTTT	3.05
AATAAA	3.05
GGATTTT	3.05
ACACAA	3.05
TATA	3.02
TTTTC	3.01
TAAAA	3
ATAAC	3
AGGAG	3
ACACA	3
AAGGAT	3
TTTTTTTA	3
TGTTTA	3
GCAAACA	3
CTTCGG	3
CCAGGGA	3
CATA	2.99
GAGAG	2.98
TAAGA	2.97
TAAT	2.96
AGGGT	2.96
TATT	2.95
AAAATG	2.92
GTTAA	2.89
GGATT	2.89
TCACAA	2.89
TACAGG	2.89
GTTAAA	2.89
GACAGG	2.89
ATAAGA	2.89
ATAAAA	2.87
ACAGGA	2.84
TTTTTTA	2.83
GGATTT	2.83
ATTTTTT	2.83
ACAGGG	2.83
TCATAA	2.83
TCACAAC	2.83
GGAGTG	2.83
CCCATA	2.83
ATGTAA	2.83
ATAAG	2.8
GAGA	2.77
TAAG	2.75
AATG	2.75
ATAAA	2.73
ATATT	2.72
TCTTGC	2.71
CAGGAT	2.71
AGGGAG	2.71
ACAATAA	2.71
TGTAA	2.69
TATAA	2.69
TTATT	2.69
GTTTTTT	2.67
ATAATA	2.67
TTTTTTT	2.67
GGGATT	2.67
CCATA	2.67
GGGGA	2.66
AAATAA	2.65
TACAAT	2.65
CTTTTGT	2.65
CCCCGG	2.65
CAGGGAT	2.65
CAGGGAG	2.65
CACAACAA	2.65
ATTTTTTT	2.65
AATTCTG	2.65
TTAA	2.63
TTTTTC	2.61
GATTTT	2.61
CCCCA	2.6
TTGT	2.59
TTTATT	2.56
TAAGG	2.56
TAAC	2.53
TTTTTTAT	2.53
TATAAG	2.53
TAACAC	2.53
CAGAGG	2.53
CACAAT	2.53
ACACAACA	2.53
ACACAAC	2.53
AACAAAA	2.53
AGGATT	2.52
ACAAAA	2.52
TTTCAG	2.5
ATTTTTA	2.5
GGAGA	2.5
TTAATA	2.5
TGTTAT	2.5
CTTCCC	2.5
ACGATA	2.5
AAAATGA	2.5
GTTTT	2.49
CACA	2.48
GATT	2.47
TAAAT	2.47
TAAAAT	2.45
GGAGG	2.45
TTTTATAT	2.45
TTTTAGC	2.45
TTTCAGC	2.45
TTTATAT	2.45
TGTTTAT	2.45
TGTTATC	2.45
TGTTAAA	2.45
TAAATAA	2.45
GGGATTTT	2.45
GGGATTT	2.45
GGGATGA	2.45
GGATTTTT	2.45
GGATAC	2.45
GAGTCGT	2.45
GAGTCG	2.45
GAGAGA	2.45
GAAAATG	2.45
CACAACAC	2.45
CAACACAA	2.45
ATTTCCC	2.45
ATAAATA	2.45
ACTAAAA	2.45
AAGGGAT	2.45
AACACAAC	2.45
AAAATGT	2.45
AAAAATGA	2.45
GAGCC	2.4
ATAACA	2.4
ATAAAAA	2.4
AAAGCA	2.4
AACAT	2.39
CTTT	2.39
CAGGA	2.38
TTTTG	2.36
TGTTT	2.36
TTTTCA	2.36
TTTGTT	2.36
TTGTA	2.36
TTATTG	2.36
TCATA	2.36
AATAAC	2.36
TATTT	2.36
CGGGA	2.35
AGTTA	2.35
TTTAA	2.34
GAGGT	2.34
TTGTGG	2.33
TTGCAT	2.33
TTAATGA	2.33
TCGTCA	2.33
TAAGGG	2.33
CATATA	2.33
CAACACA	2.33
ATGCAA	2.33
AGGGATG	2.33
ACATCAC	2.33
AAATAAA	2.33
TTTTAG	2.32
GATTGA	2.32
ACAATA	2.32
AAAAAAA	2.32
CCTT	2.32
TGACAG	2.31
TCATTT	2.31
TAACAT	2.31
TAAATG	2.31
GTGTTA	2.31
GGGTAA	2.31
GGGGAG	2.31
CCCCC	2.31
ATTTGA	2.31
AGGGTT	2.31
AGGGTA	2.31
GGAT	2.3
CCAGGG	2.29
CACGA	2.29
CAATAA	2.29
ATTTC	2.29
TCCCC	2.27
ACAACA	2.26
CAGG	2.24
TAATTA	2.24
ATACA	2.24
AAATGA	2.24
TTTTTCC	2.24
TTTTGCGG	2.24
TTTATTG	2.24
TTTATTC	2.24
TTGGGA	2.24
TTATATT	2.24
TTACTAC	2.24
TTAAAAT	2.24
TCTCACG	2.24
TCAGAG	2.24
TCACGAT	2.24
TCACAACA	2.24
TATGATT	2.24
TAGAAT	2.24
TACAGGG	2.24
TAATAAC	2.24
TAAGACA	2.24
GTTAAAA	2.24
GTGTTAT	2.24
GGTCAGCA	2.24
GGCAAGG	2.24
GGATTGG	2.24
GGATGAA	2.24
GGAGAC	2.24
GCTCTA	2.24
GCAGTGT	2.24
GCAAACAC	2.24
GAGTCGTC	2.24
CTCTAA	2.24
CCTGATT	2.24
CCCGCCG	2.24
CAGGCAC	2.24
ATTAGT	2.24
ATTACTC	2.24
ATGGAAA	2.24
ATAACAT	2.24
AGTTAAC	2.24
AGTGTGA	2.24
AGTGAGT	2.24
AGGGGG	2.24
AGGGGAG	2.24
AGGGATT	2.24
AGGGAGA	2.24
AGAGAG	2.24
ACTCTCA	2.24
ACGATAAC	2.24
ACAAGGA	2.24
ACAAAAG	2.24
AATGATG	2.24
AAACGAT	2.24
AAACACA	2.24
AAAAAAGG	2.24
TTTG	2.23
TGGAG	2.21
AGGGG	2.21
ATTTG	2.21
AATA	2.2
TAATAA	2.2
CCCAT	2.2
ACGGG	2.2
TCACA	2.19
TTTCGC	2.18
TCTTTT	2.18
TAATGG	2.18
CAGGAG	2.18
ACTTTT	2.18
AAAGTT	2.18
AAACGA	2.18
ATAAT	2.14
TTTTTTC	2.14
TTGACA	2.14
TGAGGG	2.14
TAATAT	2.14
CCCAGG	2.14
AGGAGA	2.14
AATGAG	2.14
AATAAAA	2.14
TTCGG	2.12
TTTTTAC	2.12
TTGTTAA	2.12
TTCCTT	2.12
TTAGCC	2.12
TCATTTT	2.12
TACCTT	2.12
TAAGAC	2.12
GGTTTG	2.12
GGGCGC	2.12
GGAGGC	2.12
CTTCCCG	2.12
CCCGCC	2.12
CACGAT	2.12
CACCCA	2.12
ACGCAC	2.12
ACAGGGA	2.12
ACAACACA	2.12
AATGGCA	2.12
AAGGGT	2.12
AAGGAG	2.12
GACAG	2.11
TTTTATT	2.11
TTGTAA	2.11
TTATCT	2.11
TTAGG	2.11
TAAATA	2.11
GGGAGT	2.11
CTTTTC	2.11
ATTCCT	2.11
ACGGGG	2.11
ACGATAA	2.11
AATCGC	2.11
AACAACA	2.11
TTTGA	2.1
TATTC	2.1
GAGT	2.09
GTTT	2.09
CTGGAG	2.06
ATACT	2.06
TAATT	2.06
TGTTA	2.06
TAAAAA	2.06
GAGTT	2.04
CTTAT	2.04
CTCCC	2.04
CAAGG	2.04
ATATA	2.04
TAAA	2.04
TTTTTAT	2.04
TGATTT	2.04
AATTTT	2.04
TTAAA	2.03
CATAA	2.03
GATAA	2.02
GTAAT	2.02
CCCA	2.01
ATAC	2.01
TTTTAA	2
TAACGT	2
GATTTTT	2
CCATTT	2
CATAC	2
ATATTT	2
TTTTTTCC	2
TTTTTAG	2
TTTTCTC	2
TTTTATTC	2
TTTGTTT	2
TTTGGGA	2
TTTCTTG	2
TTTCCCT	2
TTTAGG	2
TTTAACGT	2
TTGTTAAA	2
TTGTGGT	2
TTGTGGC	2
TTGTAAT	2
TTGGTAA	2
TTGCAAA	2
TTCCTTC	2
TTCCAGGG	2
TTCATTT	2
TTCAGGC	2
TTATGTA	2
TTAGTTT	2
TTACCTT	2
TTAACGTG	2
TGTCTCT	2
TGTCGTTT	2
TGTATAA	2
TGTAATT	2
TGGTATTA	2
TGGTAGA	2
TGGCTC	2
TGGCAAG	2
TGCGAC	2
TGCCGCAC	2
TGATTGAA	2
TGAGGGT	2
TGACAGG	2
TGACAAT	2
TGAATTG	2
TCTTTTT	2
TCTTGCC	2
TCTCTCC	2
TCGGAG	2
TCCCTGGA	2
TCCCTGG	2
TCCATTT	2
TCATTTTT	2
TATTGGTA	2
TATTAG	2
TATGCA	2
TATAAGG	2
TATAAGA	2
TACCCC	2
TACAGGA	2
TAAGGGT	2
TAACTGG	2
TAACAGG	2
TAAATGC	2
GTTGGA	2
GTTCCAG	2
GTGTTATC	2
GTGGAAA	2
GTATTAC	2
GTAGAG	2
GTAAATG	2
GGGTTAA	2
GGGGATTT	2
GGGCTTT	2
GGGAGAG	2
GGCGCC	2
GGCCCC	2
GGAGTGT	2
GGAGTCGT	2
GGAGTCG	2
GCTTCCCG	2
GCTTCCC	2
GCTCGG	2
GCCCGAA	2
GCCCCGC	2
GCCCCG	2
GCCAGGG	2
GCATAAAA	2
GCACAAT	2
GATTGCA	2
GATTGAT	2
GATACA	2
GAGCCTG	2
GAGAGG	2
GAGAGAA	2
GAGACT	2
GACAGGA	2
CTTTTGTT	2
CTTTTCA	2
CTTCGGC	2
CTTAAGG	2
CTGTTTA	2
CTCGTTG	2
CTCCCTG	2
CTATGAA	2
CTAAAT	2
CGTCGGT	2
CGGCCCC	2
CGGATA	2
CGCTTCC	2
CGCCTT	2
CGCCTGC	2
CCTGTTT	2
CCGGGGCT	2
CCGATGA	2
CCCGAAG	2
CCCCCA	2
CCCCAC	2
CCATAC	2
CCAGGGAA	2
CATATTGG	2
CATATTG	2
CAGGGGG	2
CAGGGAGA	2
CAGGATT	2
CACTTTT	2
CACGTAAT	2
CACGGG	2
CACGAG	2
CACCCAG	2
CAATTCTG	2
CAATTCT	2
CAATGT	2
CAATAAT	2
CAAGGGA	2
CAAACACA	2
ATTTGAT	2
ATTGGTAA	2
ATTGGTA	2
ATTCCTC	2
ATGGAAAA	2
ATGATTT	2
ATGACTA	2
ATGAATT	2
ATCCTGA	2
ATCCGGG	2
ATCATA	2
ATCACAA	2
ATATTTT	2
ATATTGG	2
ATACTC	2
ATACAGG	2
ATAAGAT	2
ATAACGA	2
ATAACAAC	2
ATAAATAA	2
AGTTGAC	2
AGTCGTCA	2
AGGTTGT	2
AGGGGGC	2
AGGCACA	2
AGGAGATA	2
AGATGGG	2
ACTTTTC	2
ACGCACA	2
ACCTTTT	2
ACCCGCC	2
ACCCCGG	2
ACCCAGG	2
ACAGGGAG	2
ACAGGAA	2
ACAGAGG	2
ACAATAAC	2
AATTTGA	2
AATTCTGG	2
AATTACTC	2
AATTACT	2
AATTACG	2
AATCCTG	2
AATAAGCA	2
AAGTTTGA	2
AAGATTAA	2
AAGATTA	2
AACTGGAT	2
AACGCAC	2
AACACAT	2
AACAATAA	2
AACAACAC	2
AACAAAT	2
AAATCGC	2
AAAGTTA	2
AAAGCAG	2
AAACTAA	2
AAACAACA	2
AAACAAAA	2
CCAGG	1.99
TGCAT	1.98
TATAT	1.98
CTAA	1.97
TAAAAAA	1.96
GATAAC	1.96
CTTTTT	1.96
CTCAC	1.96
CAGGGG	1.96
ACAATG	1.96
TTATG	1.95
TGAGG	1.95
CGGG	1.95
TAACG	1.94
TTTCAA	1.94
TTATGT	1.94
TTAACA	1.94
TGTAAT	1.94
GTATTA	1.94
CCTTTT	1.94
ATTTCC	1.94
AGGGGA	1.94
AGATTA	1.94
ACAACAC	1.94
AAATGT	1.94
AAAGGA	1.94
AAAAAAT	1.94
TTAAC	1.92
CCCT	1.92
ACCTT	1.92
AATGT	1.9
TTTTTCA	1.9
TTTTTATT	1.9
TTTAGC	1.9
TTCATT	1.9
TTAAAT	1.9
TGGAGT	1.9
TATATA	1.9
TAATTT	1.9
TAAGGA	1.9
GTTAAG	1.9
GTCTTT	1.9
GGTTTTT	1.9
GGTTGT	1.9
GGGAGC	1.9
GCACAA	1.9
GCAAGG	1.9
CTCCCT	1.9
CCCCAG	1.9
CAAGGA	1.9
ATTTGT	1.9
ATAAGG	1.9
AGGTTT	1.9
ACATTA	1.9
AATTGT	1.9
AATTCT	1.9
AATTATT	1.9
AAGGATT	1.9
AAAAGCA	1.9
AAGCA	1.9
AATAAT	1.89
TTTTGCA	1.89
TTTCAAC	1.89
TTGCCGC	1.89
TTGAGGT	1.89
TTCTTTT	1.89
TTCTTGC	1.89
TTCACA	1.89
TTACTA	1.89
TTAATAA	1.89
TTAACGT	1.89
TGTCGTT	1.89
TGGCATA	1.89
TGATTGA	1.89
TGACTA	1.89
TCTTTCA	1.89
TCTTTA	1.89
TCTTAT	1.89
TCTGGGG	1.89
TCTATG	1.89
TCCAGGG	1.89
TCAAAT	1.89
TAGTTT	1.89
TACTAA	1.89
TAATATT	1.89
GTTCCA	1.89
GTCGGT	1.89
GTATAA	1.89
GGTTTTTT	1.89
GGGTAAA	1.89
GGAGATA	1.89
GCTTCA	1.89
GATTTTTT	1.89
GAGGCT	1.89
GAGCAC	1.89
GAATAAA	1.89
CTCACG	1.89
CTATGG	1.89
CTATGA	1.89
CGTGTC	1.89
CGATAAC	1.89
CCTCTT	1.89
CCGTAG	1.89
CCCCTT	1.89
CCCCAT	1.89
CCAATA	1.89
CATTTTTA	1.89
CATATT	1.89
CATAAG	1.89
CATAAAAA	1.89
CAGTTA	1.89
CAAAATG	1.89
CAAAAGC	1.89
ATTCTGG	1.89
ATTATTT	1.89
ATCTCG	1.89
ATATTCA	1.89
ATATAC	1.89
ATATAA	1.89
ATAATAA	1.89
AGTTTGA	1.89
AGTGGA	1.89
AGTGAG	1.89
AGTCGTC	1.89
AGGTTTT	1.89
AGGAGAT	1.89
ACTATG	1.89
ACGGGGA	1.89
ACATGC	1.89
AATAATA	1.89
AATAACA	1.89
AAGGGTT	1.89
AAGAACA	1.89
AAAAAAAT	1.89
GTTTAT	1.89
GGTGGT	1.89
GGCAGG	1.89
GAATAA	1.89
TGGCTA	1.88
CCCCG	1.88
CATTTT	1.88
CAACAC	1.88
TTAAG	1.86
GTTGT	1.85
TAATG	1.84
GGGTA	1.83
CACAT	1.83
TATTA	1.81
GCACA	1.81
CTTGC	1.81
TTTGAG	1.81
TTTCCC	1.81
TATGAA	1.81
TATAG	1.81
GTAATG	1.81
AAGCAG	1.81
TCACG	1.8
GAGTG	1.8
GAGGC	1.8
CTATG	1.8
ACTAA	1.8
ACAT	1.79
CAAT	1.79
TTTTGT	1.79
TTTGCA	1.79
TTATTT	1.79
TGTTAA	1.79
TATTCA	1.79
GTAGA	1.79
GGATGA	1.79
AGCAGT	1.79
CAATA	1.77
CATGC	1.77
ATGCA	1.77
TTATA	1.76
TCCC	1.75
TTTGT	1.73
GGGAA	1.73
TTTTATA	1.73
TTTACA	1.73
TTAAGA	1.73
TGTGAT	1.73
TATTTTT	1.73
TAAGAT	1.73
GTGTGA	1.73
GTATA	1.73
GTAATT	1.73
GAAAGG	1.73
CTTTCA	1.73
CTGCCA	1.73
CATTTG	1.73
CATTTC	1.73
CAGGGAA	1.73
ATTTTA	1.73
ATTCAC	1.73
ATTACT	1.73
AGAGAA	1.73
ACGCTC	1.73
ACGAGG	1.73
AAGGGA	1.73
AAAGGG	1.73
TTTTTTCT	1.73
TTTTTCAG	1.73
TTTTTACG	1.73
TTTTTAAA	1.73
TTTTGCTG	1.73
TTTTGCAA	1.73
TTTTCGCC	1.73
TTTTCAAC	1.73
TTTTACGG	1.73
TTTGTTTG	1.73
TTTGTTC	1.73
TTTGGTA	1.73
TTTGCAT	1.73
TTTGATT	1.73
TTTGAAC	1.73
TTTCTTGC	1.73
TTTCTGC	1.73
TTTCGGG	1.73
TTTCCCTC	1.73
TTTATTGG	1.73
TTTATTCC	1.73
TTTATCTA	1.73
TTTATATT	1.73
TTTAGCGC	1.73
TTTAGCG	1.73
TTTAGCC	1.73
TTTACCT	1.73
TTTACAGG	1.73
TTTAAGA	1.73
TTGTTTCC	1.73
TTGTGGTA	1.73
TTGTGGCA	1.73
TTGTGAT	1.73
TTGGTAAG	1.73
TTGGGAG	1.73
TTGCATTC	1.73
TTGCATG	1.73
TTGACCG	1.73
TTGACAGA	1.73
TTCTTGCC	1.73
TTCTGGCC	1.73
TTCGGGA	1.73
TTCGGCAC	1.73
TTCGCTA	1.73
TTCCCTGG	1.73
TTCCATT	1.73
TTCCATC	1.73
TTCATTTT	1.73
TTCATA	1.73
TTCAGAG	1.73
TTCACGA	1.73
TTCACCG	1.73
TTCACAAC	1.73
TTCACAA	1.73
TTATTGC	1.73
TTATCTA	1.73
TTATATTT	1.73
TTATAGA	1.73
TTATAAG	1.73
TTAGGG	1.73
TTAGCCA	1.73
TTACTCTC	1.73
TTACTCT	1.73
TTACTACA	1.73
TTACGCA	1.73
TTACAGGG	1.73
TTACAAT	1.73
TTAATTC	1.73
TTAATGAG	1.73
TTAAGAC	1.73
TTAAGAA	1.73
TTAACAC	1.73
TTAAATG	1.73
TTAAAATT	1.73
TGTTTTTT	1.73
TGTTTGCA	1.73
TGTTTATC	1.73
TGTTATG	1.73
TGTGGTAT	1.73
TGTCTTT	1.73
TGTAATGG	1.73
TGTAATG	1.73
TGTAATC	1.73
TGGTCAGC	1.73
TGGTAATG	1.73
TGGTAAT	1.73
TGGGGCT	1.73
TGGCTAAA	1.73
TGGCCCAT	1.73
TGGCAGGC	1.73
TGGCAAGG	1.73
TGGATACT	1.73
TGGATAC	1.73
TGGACCTT	1.73
TGCTTCTT	1.73
TGCTACG	1.73
TGCCCC	1.73
TGCATTT	1.73
TGCATTC	1.73
TGCAGGG	1.73
TGCAAACA	1.73
TGATTTAA	1.73
TGAGGGTT	1.73
TGACAATG	1.73
TGAATTAC	1.73
TGAATGTT	1.73
TGAAATG	1.73
TGAAACTG	1.73
TGAAACT	1.73
TGAAAATG	1.73
TCTTTTA	1.73
TCTTGCG	1.73
TCTTCGG	1.73
TCTTACT	1.73
TCTGTAC	1.73
TCTGGGGC	1.73
TCTGGCCC	1.73
TCTGGCC	1.73
TCTGCGC	1.73
TCTCGTTG	1.73
TCTCACGA	1.73
TCTATTTG	1.73
TCTATGG	1.73
TCTATA	1.73
TCTAACCC	1.73
TCGTCAT	1.73
TCGTCAA	1.73
TCGTATT	1.73
TCGGTTT	1.73
TCGGGGCG	1.73
TCGGGGC	1.73
TCGGCACG	1.73
TCGGCAC	1.73
TCGCTAC	1.73
TCGCCTGC	1.73
TCCTTTC	1.73
TCCGGGC	1.73
TCCCTCCC	1.73
TCCCCAG	1.73
TCCAGGGA	1.73
TCATGGCG	1.73
TCATAAT	1.73
TCAGGAG	1.73
TCACGGC	1.73
TCACGATA	1.73
TCAAATC	1.73
TATTTGAA	1.73
TATTTAT	1.73
TATTATTG	1.73
TATTATG	1.73
TATTACGC	1.73
TATGCAA	1.73
TATGATTT	1.73
TATGAAAA	1.73
TATCTAC	1.73
TATATTTT	1.73
TATATCT	1.73
TATATAC	1.73
TATACTTT	1.73
TATACTT	1.73
TATACT	1.73
TATAAAAA	1.73
TAGTCAT	1.73
TAGTAA	1.73
TACTTTG	1.73
TACTTCGG	1.73
TACTCTCA	1.73
TACTACA	1.73
TACGGG	1.73
TACCTTT	1.73
TACCCAT	1.73
TACAATGA	1.73
TACAATG	1.73
TACAAAA	1.73
TAATTTTG	1.73
TAATTCT	1.73
TAATTAAG	1.73
TAATGTG	1.73
TAATATTC	1.73
TAAGGT	1.73
TAAGGGTT	1.73
TAAGCCCG	1.73
TAAGCCC	1.73
TAAGATT	1.73
TAACTGGT	1.73
TAACGTC	1.73
TAACGGCA	1.73
TAACCGT	1.73
TAACAGGG	1.73
TAACACC	1.73
TAAATAAT	1.73
TAAACTAA	1.73
TAAACTA	1.73
TAAAAGT	1.73
TAAAACGA	1.73
GTTTTGCA	1.73
GTTTGAG	1.73
GTTTATCT	1.73
GTTGTGGT	1.73
GTTGTGG	1.73
GTTACCTT	1.73
GTGTCGT	1.73
GTGGTGGT	1.73
GTGGCAGG	1.73
GTGGCAG	1.73
GTGATTT	1.73
GTGAAGGA	1.73
GTCTTCG	1.73
GTCTCTTT	1.73
GTCTCC	1.73
GTCTAT	1.73
GTCGTCAA	1.73
GTCCCA	1.73
GTCATAA	1.73
GTCAGGCA	1.73
GTATTACG	1.73
GTATAAG	1.73
GTAATTT	1.73
GTAATGCC	1.73
GTAATGC	1.73
GTAATAAC	1.73
GTAAGCCC	1.73
GTAACGGC	1.73
GTAAATGG	1.73
GGTTTGG	1.73
GGTTGTG	1.73
GGTTAATA	1.73
GGTTAAA	1.73
GGTGGTC	1.73
GGTGGTAA	1.73
GGTCGTT	1.73
GGTATTAC	1.73
GGTAAAAT	1.73
GGGTTGA	1.73
GGGGTGC	1.73
GGGGCTT	1.73
GGGGCGA	1.73
GGGGCAG	1.73
GGGCTTTT	1.73
GGGCGCC	1.73
GGGCCAG	1.73
GGGAGTT	1.73
GGGAGCA	1.73
GGGAGAGG	1.73
GGGAAAT	1.73
GGCGGTTA	1.73
GGCCTGG	1.73
GGCCCATA	1.73
GGCCCAT	1.73
GGCAGGT	1.73
GGCACGTA	1.73
GGATTGGC	1.73
GGATGAG	1.73
GGATGAAA	1.73
GGATACTT	1.73
GGATACT	1.73
GGAGCAC	1.73
GGAGATAT	1.73
GGAGATAA	1.73
GGAGAGG	1.73
GGACAC	1.73
GCTTCTTC	1.73
GCTTCAG	1.73
GCTGGAGA	1.73
GCTCTAT	1.73
GCGGTTA	1.73
GCGCCTT	1.73
GCGCAGGC	1.73
GCCTGATT	1.73
GCCGATGA	1.73
GCCCGAAG	1.73
GCCCCAG	1.73
GCCCCA	1.73
GCCCATAT	1.73
GCCCATA	1.73
GCCAGGGA	1.73
GCATTGT	1.73
GCATGAC	1.73
GCATCTT	1.73
GCATATA	1.73
GCATAAG	1.73
GCAGTTA	1.73
GCAGGAT	1.73
GCAGGAGA	1.73
GCACAAC	1.73
GCAATTCT	1.73
GCAACAC	1.73
GCAAACAA	1.73
GCAAAAGC	1.73
GCAAAAG	1.73
GATTTGT	1.73
GATTGATT	1.73
GATTGAC	1.73
GATGGGT	1.73
GATGCTGA	1.73
GATGCAA	1.73
GATGAATT	1.73
GATATTCA	1.73
GATATTC	1.73
GATATGAT	1.73
GATACTTC	1.73
GATAACTG	1.73
GAGGTA	1.73
GAGGCGC	1.73
GAGGAGAT	1.73
GAGGAGA	1.73
GAGCCTGC	1.73
GAGATATT	1.73
GAGATAT	1.73
GAGACTT	1.73
GACTTAT	1.73
GACGTTTC	1.73
GACGATA	1.73
GACCCGG	1.73
GACAATGT	1.73
GAATTGT	1.73
GAATTACT	1.73
GAATCGA	1.73
GAACGTA	1.73
GAAAGGA	1.73
GAAACATT	1.73
GAAAATGT	1.73
GAAAAGA	1.73
GAAAAAAA	1.73
CTTTTTC	1.73
CTTTTCAA	1.73
CTTTGCT	1.73
CTTTCAG	1.73
CTTTAAGA	1.73
CTTTAAG	1.73
CTTGCCG	1.73
CTTGCCCG	1.73
CTTCGGG	1.73
CTTCGGCA	1.73
CTTAAGGG	1.73
CTGTTTAT	1.73
CTGTCTC	1.73
CTGGGTAA	1.73
CTGGCGGT	1.73
CTGGATAC	1.73
CTGCCAT	1.73
CTCTTTT	1.73
CTCTTA	1.73
CTCTGGAG	1.73
CTCTCTCC	1.73
CTCTCTC	1.73
CTCTCACG	1.73
CTCTATG	1.73
CTCTAACC	1.73
CTCTAAC	1.73
CTCGGG	1.73
CTCCTC	1.73
CTCCAGG	1.73
CTCACGAT	1.73
CTCACGA	1.73
CTATGGA	1.73
CTACGTC	1.73
CTAATAT	1.73
CTAAGG	1.73
CGTGTTA	1.73
CGTGTCG	1.73
CGTGGAA	1.73
CGTGCCGA	1.73
CGTATTA	1.73
CGTAATGC	1.73
CGTAACGG	1.73
CGTAACG	1.73
CGGTGGT	1.73
CGGGCAT	1.73
CGGGAAG	1.73
CGGCGGG	1.73
CGGAGGC	1.73
CGCTTCCC	1.73
CGCTTAT	1.73
CGCTGGAG	1.73
CGCGTGG	1.73
CGCCTGCT	1.73
CGCCGCC	1.73
CGCCATG	1.73
CGATTGCA	1.73
CGATAACT	1.73
CGAGGCG	1.73
CGACGCT	1.73
CCTTTTG	1.73
CCTTCCC	1.73
CCTGCTC	1.73
CCTGCCA	1.73
CCTGATTT	1.73
CCTCCCC	1.73
CCGTAGC	1.73
CCGCCGC	1.73
CCGCAAG	1.73
CCGATGAA	1.73
CCCTTCC	1.73
CCCTCCC	1.73
CCCGGTGA	1.73
CCCGGAT	1.73
CCCGCCGC	1.73
CCCGAT	1.73
CCCGAAGA	1.73
CCCCTTCC	1.73
CCCCGGT	1.73
CCCATTT	1.73
CCCATATT	1.73
CCCATAT	1.73
CCCATAA	1.73
CCCAGGTA	1.73
CCCAGCG	1.73
CCATGCA	1.73
CCATGAC	1.73
CCATATTG	1.73
CCATATT	1.73
CCAGCGCG	1.73
CCAGACG	1.73
CATTTCA	1.73
CATTCCT	1.73
CATTATGC	1.73
CATGCAT	1.73
CATCCAG	1.73
CATAAGC	1.73
CAGTTGA	1.73
CAGTTAAC	1.73
CAGTTAA	1.73
CAGGGGGC	1.73
CAGGGATG	1.73
CAGGATG	1.73
CAGCTTT	1.73
CAGAGGT	1.73
CAGAGGC	1.73
CACTATG	1.73
CACGGGG	1.73
CACGAGG	1.73
CACCGGGG	1.73
CACCCAGG	1.73
CAATAACA	1.73
CAAGGGAT	1.73
CAAGGAG	1.73
CAACGCA	1.73
CAACAAT	1.73
CAAATCA	1.73
CAAAATGT	1.73
ATTTTTAC	1.73
ATTTGTT	1.73
ATTTGAA	1.73
ATTTCGC	1.73
ATTTCCCC	1.73
ATTGGTGC	1.73
ATTGCAG	1.73
ATTGAAAT	1.73
ATTCAGGC	1.73
ATTCACGA	1.73
ATTCACG	1.73
ATTCACA	1.73
ATTATGTA	1.73
ATTACTCT	1.73
ATTACTAC	1.73
ATTACTA	1.73
ATTAATGA	1.73
ATTAAGT	1.73
ATGTTTA	1.73
ATGTAAC	1.73
ATGTAAA	1.73
ATGGGGAT	1.73
ATGGCTC	1.73
ATGGCC	1.73
ATGCAAA	1.73
ATGATTTA	1.73
ATGATTGA	1.73
ATGACAGG	1.73
ATGACAAT	1.73
ATGAATTA	1.73
ATGAACAT	1.73
ATCTTGT	1.73
ATCTCGC	1.73
ATCGTATT	1.73
ATCGTAT	1.73
ATCATAA	1.73
ATCACGA	1.73
ATCACAAC	1.73
ATATTGGT	1.73
ATATGATT	1.73
ATATAAG	1.73
ATAATCA	1.73
ATAACTGG	1.73
ATAACCA	1.73
ATAACATG	1.73
ATAACAC	1.73
ATAAAAC	1.73
AGTTTTTA	1.73
AGTTTTT	1.73
AGTTTGAA	1.73
AGTTGACA	1.73
AGTTAACC	1.73
AGTGTGAT	1.73
AGGGTTT	1.73
AGGGATTG	1.73
AGGGAGAA	1.73
AGGCTC	1.73
AGGCCT	1.73
AGGCACAA	1.73
AGGATGA	1.73
AGGAGTG	1.73
AGGACTT	1.73
AGCCTGC	1.73
AGCCCGAA	1.73
AGCAGTGT	1.73
AGCACAT	1.73
AGCAATTC	1.73
AGAGCTC	1.73
AGAGAGA	1.73
AGACAGG	1.73
AGACAAGA	1.73
AGACAAG	1.73
AGAATGG	1.73
AGAAAGG	1.73
AGAAACG	1.73
ACTTTTGT	1.73
ACTTCGGC	1.73
ACTTCGG	1.73
ACTGTAT	1.73
ACTGTAA	1.73
ACTGGATA	1.73
ACTGAAGC	1.73
ACTCTCAC	1.73
ACTCCCGC	1.73
ACTACT	1.73
ACGTGCCG	1.73
ACGGGGAG	1.73
ACGGGA	1.73
ACGGCCCC	1.73
ACGGCCC	1.73
ACGGATA	1.73
ACGCTCT	1.73
ACGCCTGA	1.73
ACGATTC	1.73
ACGAGGCG	1.73
ACCCGCCG	1.73
ACCCCAT	1.73
ACCCATA	1.73
ACCATTG	1.73
ACCATGG	1.73
ACATTAT	1.73
ACATTAC	1.73
ACATGTT	1.73
ACATGCT	1.73
ACATCACG	1.73
ACATATT	1.73
ACAGGGG	1.73
ACAGGCG	1.73
ACAGGAT	1.73
ACACGCA	1.73
ACACCCA	1.73
ACACACA	1.73
ACAATGT	1.73
ACAATGAG	1.73
ACAATCT	1.73
ACAATAAA	1.73
ACAAGGAG	1.73
ACAACAAT	1.73
ACAACAAG	1.73
ACAAATGG	1.73
ACAAATG	1.73
ACAAAAC	1.73
AATTATTT	1.73
AATTAAG	1.73
AATTAAA	1.73
AATGTAA	1.73
AATGGCAT	1.73
AATGGCAA	1.73
AATGACTA	1.73
AATCTCG	1.73
AATCCGG	1.73
AATCATAA	1.73
AATCATA	1.73
AATCACA	1.73
AATATATA	1.73
AATACCT	1.73
AATAATCA	1.73
AATAACAT	1.73
AATAAATA	1.73
AATAAAGT	1.73
AATAAAC	1.73
AATAAAAT	1.73
AAGTTAA	1.73
AAGGGATG	1.73
AAGGATC	1.73
AAGGAGC	1.73
AAGGACT	1.73
AAGCCCGA	1.73
AAGCATA	1.73
AAGCACAA	1.73
AAGCACA	1.73
AAGATGG	1.73
AAGAGCC	1.73
AAGAGAG	1.73
AACTTTAA	1.73
AACTGGTC	1.73
AACTCCC	1.73
AACCTGT	1.73
AACATTA	1.73
AACATGT	1.73
AACATGC	1.73
AACAGAGG	1.73
AACAATCT	1.73
AACAAGGA	1.73
AACAAAAG	1.73
AACAAAAA	1.73
AAATTGCA	1.73
AAATGGCA	1.73
AAATGCT	1.73
AAATACC	1.73
AAATAAC	1.73
AAATAAAG	1.73
AAAGTTAA	1.73
AAAGGTT	1.73
AAAGGGA	1.73
AAAGGAT	1.73
AAAGGAC	1.73
AAAGCAGG	1.73
AAACCAC	1.73
AAACACAA	1.73
AAAATGTA	1.73
AAAATAAC	1.73
AAAAAGGA	1.73
AAAAAATA	1.73
AATTT	1.72
AATGG	1.72
AGATT	1.72
AAGGG	1.72
AATT	1.71
TTTATG	1.71
TATTTT	1.71
CTTTTG	1.71
ATTTTG	1.71
TTTAAC	1.7
TATGGC	1.7
GGAGAT	1.7
CTTATT	1.7
CTGTTT	1.7
AACATT	1.7
AAAAGG	1.7
AAAAT	1.69
TTCA	1.68
TTTAC	1.68
TGACA	1.68
TGCTA	1.67
TCTAT	1.67
TTACT	1.67
CCATG	1.67
TTTTGTT	1.67
TTGTGA	1.67
TTCGGG	1.67
TTAGTT	1.67
TGGCTAA	1.67
TAATTAT	1.67
GTTTTAT	1.67
GTAGAA	1.67
GGGGAA	1.67
GCCCGA	1.67
GATTTTC	1.67
GAATTG	1.67
CTCTTT	1.67
CTCCCC	1.67
CGCTAC	1.67
CGAGGC	1.67
CCTTTC	1.67
CATAAAA	1.67
CAAGGG	1.67
CAAGAG	1.67
ATAAAC	1.67
AGTGTT	1.67
AGCACA	1.67
AGAGGT	1.67
ACTTTTG	1.67
AATCTC	1.67
TTAG	1.65
GAAT	1.63
ATTC	1.63
TTTCC	1.63
AAATA	1.63
AAAAAA	1.63
CTTGT	1.63
TTTTCAA	1.63
TTTGAGGT	1.63
TTTCGCT	1.63
TTTCGCC	1.63
TTGACAG	1.63
TTCTGTTT	1.63
TTATTGT	1.63
TTAAGGG	1.63
TGTTTCT	1.63
TGGTATT	1.63
TGGGTC	1.63
TGGGTAAA	1.63
TGGCGGG	1.63
TGGAGAT	1.63
TGCAATT	1.63
TGCAAAG	1.63
TGAAGGAT	1.63
TCTCTGG	1.63
TCGTAT	1.63
TCCCCC	1.63
TCACGG	1.63
TCACAT	1.63
TATTTTTT	1.63
TATTGGT	1.63
TATTGCC	1.63
TATTCAT	1.63
TAGTCA	1.63
TACCCA	1.63
TAATGGC	1.63
TAACATG	1.63
TAAAATA	1.63
TAAAAAAA	1.63
GTTGTTA	1.63
GTTGTG	1.63
GTTGTA	1.63
GTTGGG	1.63
GTTAATA	1.63
GTGGTC	1.63
GTCGTCA	1.63
GTCAGCA	1.63
GGTCAGC	1.63
GGGAAC	1.63
GCTGGAG	1.63
GCCCAT	1.63
GCATAT	1.63
GATTGAA	1.63
GAGTTA	1.63
GAGTGT	1.63
GAGGTT	1.63
GAGGCG	1.63
GAGCCT	1.63
GACGCTC	1.63
GACAGGG	1.63
CTAATA	1.63
CTAACA	1.63
CGGGGCT	1.63
CGGGAA	1.63
CCTCAT	1.63
CCGGGCA	1.63
CCCCAGG	1.63
CCCAGGG	1.63
CCATGG	1.63
CCATAA	1.63
CCAGGTA	1.63
CAGGGGA	1.63
CAGAAT	1.63
CACGTA	1.63
CACAACAT	1.63
CAAATGG	1.63
CAAAGT	1.63
CAAAGGG	1.63
CAAAAGCA	1.63
ATTTATG	1.63
ATTGATT	1.63
ATTGAAA	1.63
ATTACGC	1.63
ATGAGA	1.63
ATCCCC	1.63
ATATATA	1.63
ATAAGCA	1.63
ATAACTG	1.63
AGGGGCA	1.63
AGGAGC	1.63
AGGACT	1.63
AGCGAC	1.63
AGCCCC	1.63
AGACTT	1.63
AGACAT	1.63
ACTTAT	1.63
ACTGGAT	1.63
ACGTTTC	1.63
ACGTGCC	1.63
ACGCTCA	1.63
ACGCAAA	1.63
ACCATGA	1.63
AATAAAG	1.63
AAGGTT	1.63
AAGCAGT	1.63
AACTGGT	1.63
AACCTT	1.63
AACATCAC	1.63
AAATGAC	1.63
AAAATGAC	1.63
AAAATGAA	1.63
AAAAGTT	1.63
AAAAGGA	1.63
AAAAAAAA	1.63
AAAT	1.63
GTTA	1.62
ACGAT	1.62
TTTTGC	1.62
AGAGA	1.62
TTTATA	1.61
GACGCT	1.61
CCCCT	1.61
GGCTT	1.6
TTGTTT	1.6
TTCTCA	1.6
TTATAT	1.6
TGTTTT	1.6
TGTCGT	1.6
TCCAGG	1.6
GTTAAC	1.6
CCATGA	1.6
ATGAGG	1.6
ATCCTG	1.6
ATATTC	1.6
ATAAAT	1.6
ATAAAAAA	1.6
ACAACAA	1.6
AATGTG	1.6
CGGGG	1.58
TCCT	1.57
TATGA	1.57
AATAC	1.57
TAGA	1.55
AATGA	1.54
ACAA	1.53
TCCTC	1.53
CACGG	1.53
AGACT	1.53
TTTAG	1.52
TTAGC	1.51
TGGGG	1.51
GGATA	1.51
CATAT	1.51
TTCTTT	1.51
TTACCT	1.51
TGCTAC	1.51
TGCCAT	1.51
TGCATT	1.51
TGCAAT	1.51
TGACCC	1.51
TCCCTG	1.51
TATTTA	1.51
TAGTC	1.51
GTTATG	1.51
GTTATC	1.51
GTGTCT	1.51
GGTTAA	1.51
GGCACA	1.51
GGATAA	1.51
GGAGTT	1.51
GGAGAG	1.51
GAACAT	1.51
CTAAAA	1.51
CGTTTTT	1.51
CGGGAG	1.51
CGGAGG	1.51
CCTGCT	1.51
CCGCCG	1.51
CATTTTT	1.51
CAGTGGC	1.51
CAAAAAA	1.51
ATTTTGC	1.51
ATAGA	1.51
ATAAGC	1.51
AGGCTT	1.51
ACTAAA	1.51
ACCTGT	1.51
ACAACAT	1.51
AACGAT	1.51
AAAAATG	1.51
TGAGA	1.5
TAGCC	1.5
GGGAGA	1.5
GAATTT	1.5
CTTGCC	1.5
CGGGGA	1.5
ATTACG	1.5
ATGAAT	1.5
AGAACA	1.5
ACAATGA	1.5
TTCCT	1.48
TTCAT	1.48
TGTGA	1.48
GTTTA	1.48
CCTGC	1.48
AGGTT	1.48
ATTA	1.47
TCCCT	1.46
TCCAT	1.46
CGAGG	1.46
CCTTC	1.46
TAGAA	1.46
TAACAA	1.46
GGGATG	1.46
AGGGAA	1.46
CAATT	1.44
TCTCA	1.44
TCATT	1.44
GGGGC	1.44
AATTA	1.43
ATTTA	1.41
ACGTG	1.41
TTTTCT	1.41
TTTTCG	1.41
TTTTCC	1.41
TTTGAT	1.41
TTGAGG	1.41
TTAAAA	1.41
TGCAAA	1.41
TACTA	1.41
GTTTTA	1.41
CAGGCA	1.41
AATTAC	1.41
AATGGC	1.41
AAAGGT	1.41
AAAAGA	1.41
TTTTATG	1.41
TTTATGG	1.41
TTTATCT	1.41
TTTACT	1.41
TTTAACG	1.41
TTGTCGT	1.41
TTGGAG	1.41
TTATTTT	1.41
TTATGGC	1.41
TTAAGT	1.41
TGTCTC	1.41
TGTAAC	1.41
TGGGTAA	1.41
TGGCAGG	1.41
TCTTTC	1.41
TCTTCG	1.41
TCTCCC	1.41
TCTATTT	1.41
TAATTTT	1.41
TAATAAT	1.41
TAACGTG	1.41
TAACAG	1.41
TAAAATT	1.41
GTTTTTA	1.41
GTTTTGC	1.41
GTTTGG	1.41
GTAATGG	1.41
GGTCTC	1.41
GGGTAG	1.41
GGGGATT	1.41
GGGAGG	1.41
GATGCA	1.41
GAGTTG	1.41
GAGGGT	1.41
GAAGGAT	1.41
CTTTGG	1.41
CTTGTT	1.41
CTTAAG	1.41
CTGGAGA	1.41
CTGCTA	1.41
CGTCGG	1.41
CGACCA	1.41
CCTTCG	1.41
CCTTCC	1.41
CCTGCAA	1.41
CCCTCT	1.41
CCCGAA	1.41
CAGGAGA	1.41
CACGCA	1.41
CACATG	1.41
AGGATG	1.41
AGGAAT	1.41
ACACAT	1.41
AATCCT	1.41
AATAAAT	1.41
AAGTTTG	1.41
AAGGTG	1.41
TTTTTTTC	1.41
TTTTTTAG	1.41
TTTTTTAC	1.41
TTTTTGTT	1.41
TTTTTGAT	1.41
TTTTTCCT	1.41
TTTTTAGC	1.41
TTTTGTTG	1.41
TTTTGTTC	1.41
TTTTGTGA	1.41
TTTTGTA	1.41
TTTTGCCT	1.41
TTTTCTTG	1.41
TTTTCTCA	1.41
TTTTCGG	1.41
TTTTCGAG	1.41
TTTTCCG	1.41
TTTTCCC	1.41
TTTTCCAT	1.41
TTTTCAGC	1.41
TTTTATTA	1.41
TTTTATGG	1.41
TTTTAGTA	1.41
TTTTAGCG	1.41
TTTTAGCC	1.41
TTTTAGCA	1.41
TTTTACT	1.41
TTTTAATA	1.41
TTTGTTGT	1.41
TTTGTTG	1.41
TTTGTGA	1.41
TTTGTCC	1.41
TTTGTAAT	1.41
TTTGTAA	1.41
TTTGGGAT	1.41
TTTGGGAG	1.41
TTTGCTCG	1.41
TTTGCATG	1.41
TTTGCAGT	1.41
TTTGCAGG	1.41
TTTGCAAG	1.41
TTTGCAAA	1.41
TTTGATGC	1.41
TTTGAGT	1.41
TTTGAGA	1.41
TTTGACG	1.41
TTTGAATC	1.41
TTTCTGCT	1.41
TTTCTCAC	1.41
TTTCGGGT	1.41
TTTCGCTA	1.41
TTTCGCCG	1.41
TTTCGAG	1.41
TTTCCTCA	1.41
TTTCCTC	1.41
TTTCCGGG	1.41
TTTCCCCC	1.41
TTTCCATT	1.41
TTTCATTT	1.41
TTTCATGA	1.41
TTTCAGGG	1.41
TTTCAGCG	1.41
TTTCAGCC	1.41
TTTCAGCA	1.41
TTTCACCG	1.41
TTTCACA	1.41
TTTATTTA	1.41
TTTATTCA	1.41
TTTATTAC	1.41
TTTATATC	1.41
TTTAGGC	1.41
TTTAGCA	1.41
TTTACTA	1.41
TTTACGGG	1.41
TTTACCTC	1.41
TTTACCC	1.41
TTTACAAT	1.41
TTTAATGG	1.41
TTTAATAA	1.41
TTTAATA	1.41
TTTAAGAA	1.41
TTTAACCG	1.41
TTGTTTT	1.41
TTGTTTGC	1.41
TTGTTGAT	1.41
TTGTTATG	1.41
TTGTTAAG	1.41
TTGTGATT	1.41
TTGTGATG	1.41
TTGTCTTT	1.41
TTGTCGCA	1.41
TTGTCATT	1.41
TTGTAGC	1.41
TTGTAATT	1.41
TTGGGAT	1.41
TTGGGAGT	1.41
TTGGCTAA	1.41
TTGGCGGG	1.41
TTGGCGAG	1.41
TTGGCATA	1.41
TTGGAGAT	1.41
TTGCTTG	1.41
TTGCTCAA	1.41
TTGCGGCC	1.41
TTGCGCCT	1.41
TTGCCGCA	1.41
TTGCCGAA	1.41
TTGCATGA	1.41
TTGCAGGC	1.41
TTGCAAAG	1.41
TTGATGC	1.41
TTGATATT	1.41
TTGAGTG	1.41
TTGAGGGA	1.41
TTGAGGG	1.41
TTGACT	1.41
TTGACCGC	1.41
TTGAATTG	1.41
TTGAATC	1.41
TTGAACGT	1.41
TTGAAATG	1.41
TTCTTTTA	1.41
TTCTTTA	1.41
TTCTTACT	1.41
TTCTGGTC	1.41
TTCTGGA	1.41
TTCTGCG	1.41
TTCTCTGG	1.41
TTCTCAGG	1.41
TTCTCAG	1.41
TTCTCACG	1.41
TTCTACG	1.41
TTCGGTTT	1.41
TTCGGGAT	1.41
TTCGGCTC	1.41
TTCGGCAA	1.41
TTCGCTAC	1.41
TTCGATGC	1.41
TTCGATG	1.41
TTCGAGG	1.41
TTCGAACA	1.41
TTCGAAC	1.41
TTCCTTCG	1.41
TTCCTAA	1.41
TTCCGGGA	1.41
TTCCCGGG	1.41
TTCCCGA	1.41
TTCCCCC	1.41
TTCCATTT	1.41
TTCATTA	1.41
TTCATGGC	1.41
TTCATCAC	1.41
TTCATAT	1.41
TTCAGGCG	1.41
TTCAGGAG	1.41
TTCAGCAT	1.41
TTCACGAC	1.41
TTCACCGG	1.41
TTCACAG	1.41
TTCAACCT	1.41
TTATTTAT	1.41
TTATTGTA	1.41
TTATTGCC	1.41
TTATTGA	1.41
TTATTCTT	1.41
TTATTAG	1.41
TTATGTAT	1.41
TTATGTAA	1.41
TTATGGCT	1.41
TTATGAT	1.41
TTATCTTA	1.41
TTATCTCG	1.41
TTATCTC	1.41
TTATCTAC	1.41
TTATATTC	1.41
TTATAAGA	1.41
TTAGTCA	1.41
TTAGGGCT	1.41
TTAGGGC	1.41
TTAGCGCA	1.41
TTAGCCG	1.41
TTACTTGT	1.41
TTACTTG	1.41
TTACTCCG	1.41
TTACGGGG	1.41
TTACGGG	1.41
TTACGGA	1.41
TTACGCAA	1.41
TTACCTTT	1.41
TTACCTC	1.41
TTAATTCT	1.41
TTAATGGC	1.41
TTAATGAC	1.41
TTAATAT	1.41
TTAATAAA	1.41
TTAAGTG	1.41
TTAAGGGT	1.41
TTAAGGGA	1.41
TTAAGGAA	1.41
TTAAGACA	1.41
TTAAGAAC	1.41
TTAACGTC	1.41
TTAACGGA	1.41
TTAACCGT	1.41
TTAACACG	1.41
TTAAATGC	1.41
TTAAAGGT	1.41
TGTTTTGC	1.41
TGTTTTG	1.41
TGTTTTAG	1.41
TGTTTTA	1.41
TGTTTCTG	1.41
TGTTTATT	1.41
TGTTTAC	1.41
TGTTGTCG	1.41
TGTTCTGA	1.41
TGTTCCA	1.41
TGTTATCT	1.41
TGTTATCA	1.41
TGTTAATT	1.41
TGTTAAAG	1.41
TGTTAAAA	1.41
TGTGTTT	1.41
TGTGTTAG	1.41
TGTGTTA	1.41
TGTGTGCT	1.41
TGTGTCT	1.41
TGTGGTC	1.41
TGTGGCAG	1.41
TGTGCTGT	1.41
TGTGATTT	1.41
TGTGATG	1.41
TGTGAATT	1.41
TGTGAAG	1.41
TGTCTTTA	1.41
TGTCTTGC	1.41
TGTCTCTT	1.41
TGTCCAG	1.41
TGTCATC	1.41
TGTATAAG	1.41
TGTAGAG	1.41
TGTAGAA	1.41
TGTAATTT	1.41
TGTAATCA	1.41
TGTAACC	1.41
TGGTTTAA	1.41
TGGTTATT	1.41
TGGTGTCT	1.41
TGGTGGTC	1.41
TGGTGATT	1.41
TGGTCGTT	1.41
TGGTCGG	1.41
TGGTAGAA	1.41
TGGGTTGA	1.41
TGGGTCA	1.41
TGGGGTGT	1.41
TGGGGTA	1.41
TGGGGCTG	1.41
[truncated: 42,967 more rows]
