# Supplementary material for: Hfq CLASH uncovers sRNA-target interaction networks linked to nutrient availability adaptation
Source: eLife. 2020 May 1;9:e54655. doi: 10.7554/eLife.54655 (PMC7213987; doi:10.7554/eLife.54655)
Supplement: Supplementary file 9. — PyMotif from the pyCRAC package was used for these analyses. For the motif search analyses we first clustered overlapping chimeric fragments into a single contig. For the 3'UTR motif analyses we used 188 clusters. [file elife-54655-supp9.xlsx]

## Sheet: Supplementary File 9
Supplementary File 9. Motif analyses of chimeric fragments that mapped to 3' UTRs.
PyMotif from the pyCRAC package was used for these analyses.
For the motif search analyses we first clustered overlapping chimeric fragments into a single contig.
For the 3'UTR motif analyses we used 188 clusters.
# k-mer lengths:
#	min: 4
#	max: 8
# 188 intervals
# k-mer	Z-score
TTTTTT	4.95
TTTTT	4.37
TTTT	3.77
CTTTTTT	3.64
CCCC	3.59
TAAT	3.59
TTTTTTT	3.5
TTTAA	3.36
GCGGG	3.36
TTTTA	3.27
GGGG	3.2
TTTTTTA	3.16
GGATTT	3.05
CACTCG	3.05
ATTTTT	3.02
TCATTA	3
ATTTTTT	3
CCCT	2.99
ATTT	2.91
CAGGG	2.89
TTTTTA	2.86
CTTTTT	2.84
ATTTT	2.83
TGTAAT	2.83
TAACGT	2.83
GTGTA	2.83
GCGGGAA	2.83
CCCCGC	2.83
CTTTT	2.78
AGGG	2.73
CATTTT	2.71
CAGACA	2.71
TTTA	2.71
TAATT	2.69
TAACA	2.68
TTTTAT	2.67
TTTCCT	2.67
GCGGGA	2.67
TCCCC	2.67
AATAA	2.66
CGGG	2.65
TTTTTAT	2.65
TAGAG	2.65
GTTTAA	2.65
GAAAAATG	2.65
CTCGAAGA	2.65
CTCGAAG	2.65
CCTTGC	2.65
CACTCGAA	2.65
CACTCGA	2.65
CAAGAC	2.65
ACTCGAAG	2.65
ACTCGAA	2.65
ACATTG	2.65
AATAAT	2.65
TGCCC	2.6
CTCTT	2.6
GGGA	2.59
GACAG	2.56
CTTG	2.55
CTAA	2.53
TTTTTC	2.53
TAATCC	2.53
TAAGT	2.53
GTTTTT	2.53
GCTTTTTT	2.53
GCTTTTT	2.53
CCCTC	2.52
ATACC	2.52
GGGGG	2.5
GGGAG	2.5
CTCTTT	2.5
GCGGGG	2.5
ACTAA	2.5
CTTGC	2.45
TTTTTTTA	2.45
TTTGAG	2.45
TTTAACA	2.45
TTGACA	2.45
TGTGGGCA	2.45
TGTGGGC	2.45
TGGGCACT	2.45
TGGGCAC	2.45
TGCCTGA	2.45
TCGCAAGA	2.45
TCGCAAG	2.45
TCGAAGAT	2.45
TACCAG	2.45
TAACGTCG	2.45
TAACGTC	2.45
GTGTC	2.45
GTGGGCAC	2.45
GTGGGCA	2.45
GTCGCAAG	2.45
GTCGCAA	2.45
GGGCAGG	2.45
GGGCACTC	2.45
GGGCACT	2.45
GGCACTCG	2.45
GGCACTC	2.45
GCCCTC	2.45
GCACTT	2.45
GCACTCGA	2.45
GCAAGAC	2.45
GATACGG	2.45
GAGTGA	2.45
GAAGATAC	2.45
CTGTGT	2.45
CGTCGCAA	2.45
CGTCGCA	2.45
CGCAAGAC	2.45
CCCGTT	2.45
CAGACAA	2.45
CACGTAAT	2.45
CACGTAA	2.45
AGATACGG	2.45
AGAAAAAG	2.45
ACGTCGCA	2.45
ACGTAAT	2.45
ACATAA	2.45
AACTAA	2.45
AATA	2.44
GCCC	2.39
GGGCA	2.35
AGGGA	2.35
ATAA	2.35
TTTAAC	2.33
TGGGCA	2.33
GTGGTG	2.33
GGCTTTT	2.33
CAGGGA	2.33
AGCGGG	2.33
ACAGGG	2.33
GGCAGG	2.32
CCCTT	2.32
AAAAATG	2.32
TGAGG	2.31
ACGAAA	2.31
AAATAA	2.31
GGGGC	2.29
TTTTC	2.27
TAATC	2.27
CGGGG	2.27
GCCTG	2.24
ATAAT	2.24
TTTCCCC	2.24
TTTATCAG	2.24
TTTAACAA	2.24
TTCTTAAC	2.24
TTCTTAA	2.24
TTATTC	2.24
TTAACGTC	2.24
TTAACGT	2.24
TTAACAAT	2.24
TTAACAA	2.24
TGGATTT	2.24
TGCAAT	2.24
TGAATACC	2.24
TCATTAC	2.24
TCACTC	2.24
TATCAGAC	2.24
TATCAGA	2.24
GTTGTGG	2.24
GTTGTG	2.24
GTTGAC	2.24
GTGTGGGC	2.24
GTCTTG	2.24
GGGAGA	2.24
GCTCTTT	2.24
GCTCTT	2.24
GCAAGACG	2.24
GATTCTTA	2.24
GATTCTT	2.24
GACGAAAA	2.24
GACAGA	2.24
GAATACC	2.24
GAACTAA	2.24
CTTAACGT	2.24
CTCTCA	2.24
CGTAATTC	2.24
CGTAATT	2.24
CGGGGG	2.24
CGAAAAAT	2.24
CCTTTTTT	2.24
CCGGCAT	2.24
CCCTTT	2.24
CCCGCC	2.24
CATCTG	2.24
CAAGACGA	2.24
CAAGACG	2.24
ATTTTTTT	2.24
ATTTTTC	2.24
ATTCTTA	2.24
ATTAGC	2.24
ATGAATAC	2.24
ATCAGAC	2.24
ATACCA	2.24
AGTTTAA	2.24
AGAGTGA	2.24
AGACGAAA	2.24
AGACGAA	2.24
ACGTAATT	2.24
ACGAAAAA	2.24
ACATTGC	2.24
ACAGACA	2.24
ACAATCT	2.24
AATCTT	2.24
AATAACA	2.24
AAGACGAA	2.24
AAGACGA	2.24
AAATGAAT	2.24
AAAATGAA	2.24
GTAAT	2.2
GTCTC	2.18
GCCCT	2.18
CCTTG	2.14
AACTA	2.14
TTAGC	2.13
CCCCG	2.13
AGACA	2.13
ACTCG	2.13
TTGCCA	2.12
TTCCCC	2.12
TGCTCT	2.12
TCGAAGA	2.12
GGGGAG	2.12
GGGCAC	2.12
GCACTCG	2.12
GACGAA	2.12
GACAGG	2.12
CTTTTTTT	2.12
CTCGAA	2.12
CTAACT	2.12
CCCCT	2.12
CAGGGG	2.12
AAAAGAA	2.12
GCCGG	2.12
TTTAAT	2.11
TGTTGA	2.11
TAAGG	2.11
GTAATT	2.11
GGTTTT	2.11
CTAAT	2.11
CGGGAA	2.11
CCGGCA	2.11
CCCCC	2.11
CAGGCC	2.11
AGACAA	2.11
ACCAGG	2.11
AACACG	2.11
CTTT	2.09
GGGC	2.08
GAGG	2.06
GTTTT	2.04
CGGGA	2.04
TCTT	2.04
TTTCC	2.03
TAGC	2.02
TTTAAA	2
GCCCC	2
CTCGT	2
AATCT	2
TTTTTTAT	2
TTTGAGC	2
TTTCCCCC	2
TTGCGGT	2
TTGAGG	2
TTGACAG	2
TTCTTTGA	2
TTCATTAC	2
TTCATTA	2
TTATCAGA	2
TGTGTGGG	2
TGTGTGG	2
TGTAATC	2
TGGCTC	2
TGCTCTTT	2
TGCTCTT	2
TGCCTGAT	2
TGCCAGTC	2
TGCCAGT	2
TGAGTAA	2
TGAACACG	2
TCTTTAAC	2
TCTGTGTG	2
TCTGTGT	2
TCTCGA	2
TCCGAAA	2
TCCCCCC	2
TCCAGCC	2
TCATTACG	2
TCAGACAA	2
TATTCC	2
TATGCC	2
TATGCAC	2
TAGCGG	2
TAGCCTG	2
TAGCCT	2
TAGCAC	2
TACGGATT	2
TACGGAT	2
TACGAA	2
TAATTTTT	2
TAATTCAT	2
TAATTCA	2
TAATCCA	2
TAAGTT	2
TAACAATT	2
GTTTAATT	2
GTTTAAT	2
GTGTAA	2
GTGGTGG	2
GTGAACAC	2
GTAGAG	2
GTAATTCA	2
GGTTTTT	2
GGGGTG	2
GGGGGG	2
GGGGAGA	2
GGATTTT	2
GGATTCTT	2
GCTTAG	2
GCTGAGAA	2
GCTGAGA	2
GCTCTTTA	2
GCGGGAAG	2
GCCTGCG	2
GCCCCT	2
GATACGGA	2
GAGTGAAC	2
GAGTGAA	2
GACATAA	2
GACATA	2
GACAATCT	2
GACAATC	2
GACAAG	2
GAATAACA	2
GAACACGT	2
GAAAGCA	2
GAAAAGAA	2
CTTTAACA	2
CTTTAAC	2
CTGTGTGG	2
CTGTGTG	2
CTGTAAT	2
CTGGATTT	2
CTGCTCTT	2
CTGCTCT	2
CTCTTTT	2
CTCTGTAG	2
CTAATT	2
CTAATA	2
CGTTTT	2
CGTCTC	2
CGGCTTT	2
CGGATTCT	2
CGGATTC	2
CGCTTTT	2
CGCGCCGC	2
CGAAGTT	2
CCTTGCC	2
CCTCTCA	2
CCGGCC	2
CCCCGCG	2
CCCCCG	2
CCCCCC	2
CCATTTTT	2
CCATTTT	2
CCAGGGA	2
CATTACG	2
CATTAAA	2
CAGGGAA	2
CAGACAAT	2
CACCCC	2
CAATCTGT	2
CAATCTG	2
ATTTCCC	2
ATTTATCA	2
ATTCTTAA	2
ATTCATTA	2
ATGTTA	2
ATGGCGC	2
ATGCAC	2
ATCTGTGT	2
ATCTGTG	2
ATCCCA	2
ATCAGACA	2
ATACGGAT	2
ATACGGA	2
ATAATT	2
ATAATCC	2
AGTTTAAT	2
AGTGTA	2
AGTGAACA	2
AGTGAAC	2
AGGATA	2
AGCGGGAA	2
AGCGGGA	2
AGCCCTC	2
AGCACC	2
AGAGTGAA	2
AGACAATC	2
AGACAAT	2
AGAACTA	2
ACTGCTCT	2
ACTGATA	2
ACTAAT	2
ACTAAC	2
ACGGATTC	2
ACGGATT	2
ACGAAGT	2
ACCTTG	2
ACCAGGG	2
ACAGGGG	2
ACACGTAA	2
ACACGTA	2
ACAATCTG	2
AATTCATT	2
AATTCAT	2
AATGCTT	2
AATCTGTG	2
AATCTGT	2
AATAACAA	2
AAGTTTAA	2
AAGTTTA	2
AAGCAC	2
AAGAGTGA	2
AACACGTA	2
AACACGT	2
AAAATGGT	2
AAAAGAAG	2
AAATG	1.98
CCTCT	1.96
CACTC	1.96
GGATT	1.96
CATTA	1.96
ATAAC	1.96
TCCC	1.95
CTCT	1.95
TAACAA	1.94
CTTTTA	1.94
ATTTTG	1.94
AGGGT	1.94
AATACC	1.94
TGTGGG	1.9
TCGCAA	1.9
TCAGAC	1.9
TAATTT	1.9
GTAGA	1.9
GCCTGAT	1.9
GAAAAAT	1.9
CGCCGG	1.9
CCAGGG	1.9
ATTCTT	1.9
ATAGT	1.9
ATACCG	1.9
TCTTT	1.9
TGACA	1.89
TAAAT	1.89
AGTGA	1.89
TTTTTTG	1.89
TTTCCTC	1.89
TTCTTTG	1.89
TTCCTCT	1.89
TTATCAG	1.89
TTAGCGT	1.89
TTAACA	1.89
TGCCGT	1.89
TCTTTGA	1.89
TCTTAACG	1.89
TCTTAAC	1.89
TAACAAT	1.89
GTTGGC	1.89
GTAATTC	1.89
GGGAGG	1.89
GGCTTTTT	1.89
GGCCGT	1.89
GATGTTG	1.89
GAACTA	1.89
GAAATA	1.89
CTTTAA	1.89
CTGTTC	1.89
CTGGGA	1.89
CTAAG	1.89
CGAAGATA	1.89
CCTGCC	1.89
CCCTCA	1.89
CCCCAG	1.89
CATTTTT	1.89
CAGGGT	1.89
CAATCT	1.89
ATTTCCT	1.89
ATGAATA	1.89
ATACGG	1.89
ATAACA	1.89
AGGGTA	1.89
AGGGGC	1.89
ACTCGT	1.89
ACCAGC	1.89
AATTCA	1.89
AAGAAAA	1.89
AACGTCGC	1.89
AACGTCG	1.89
AAATGAA	1.89
AAATAAA	1.89
AAACGG	1.89
AAAAATGA	1.89
TAATA	1.89
CTCGA	1.89
AGGGG	1.89
AGAAAA	1.89
TTCCC	1.88
TCATT	1.88
AAAATG	1.88
GACA	1.86
CTCG	1.82
AGAC	1.82
TTTTG	1.81
ATAAA	1.81
TGTGT	1.81
TATAA	1.81
GGCTTT	1.81
GGAGG	1.81
CTAAC	1.81
AAATGA	1.81
GCTTTT	1.79
ATGCC	1.79
AGAGT	1.79
TTAA	1.78
AGTT	1.78
TTTC	1.77
TAAG	1.77
CCAGC	1.77
TTTCCC	1.73
TTAATC	1.73
TGCGGG	1.73
TGACAG	1.73
TAGTT	1.73
TAATAA	1.73
GGGTC	1.73
GGCACT	1.73
GAGGG	1.73
ACTTTT	1.73
AATAAC	1.73
TTTTTCT	1.73
TTTTGTTT	1.73
TTTTCAG	1.73
TTTTCA	1.73
TTTTATG	1.73
TTTTATC	1.73
TTTGGGGG	1.73
TTTGGGG	1.73
TTTGGG	1.73
TTTGACA	1.73
TTTCTGGT	1.73
TTTACTG	1.73
TTTAATC	1.73
TTGTGGAG	1.73
TTGTAA	1.73
TTGGGGG	1.73
TTGCCTGA	1.73
TTGACTCT	1.73
TTGACGA	1.73
TTCGAG	1.73
TTCCTTGC	1.73
TTCCTTG	1.73
TTCCGGC	1.73
TTCCCCCC	1.73
TTCACTC	1.73
TTCAACA	1.73
TTCAAC	1.73
TTATTCC	1.73
TTATGCAC	1.73
TTATGCA	1.73
TTATCCCA	1.73
TTATCCC	1.73
TTAGCT	1.73
TTAGCCTG	1.73
TTAGCCT	1.73
TTAGCA	1.73
TTACGAAG	1.73
TTACGAA	1.73
TTACACG	1.73
TTAAGT	1.73
TTAACCG	1.73
TGTTGAG	1.73
TGTGTC	1.73
TGTGGAGA	1.73
TGTGGAG	1.73
TGTCCG	1.73
TGTAGCGG	1.73
TGTAGCG	1.73
TGGGTC	1.73
TGGCTCA	1.73
TGGATTTC	1.73
TGGAGAAT	1.73
TGCTTGAC	1.73
TGCTTGA	1.73
TGCTAC	1.73
TGCCGTG	1.73
TGCACACC	1.73
TGCACAC	1.73
TGCAATT	1.73
TGATTTCA	1.73
TGATTATT	1.73
TGATGGCC	1.73
TGAGTAAT	1.73
TGAGAAAA	1.73
TGAGAAA	1.73
TGACTTT	1.73
TCTTTGAG	1.73
TCTCGAT	1.73
TCTCAC	1.73
TCGTTGTG	1.73
TCGCTGGA	1.73
TCGAGC	1.73
TCCTTGC	1.73
TCCGAAAA	1.73
TCCCCGC	1.73
TCCCCCCC	1.73
TCCAGCCA	1.73
TCAAGAG	1.73
TATTATGC	1.73
TATGCACA	1.73
TATCCCA	1.73
TATAAA	1.73
TAGCTCA	1.73
TAGCGGGA	1.73
TAGCGGG	1.73
TAGAGC	1.73
TACTGATA	1.73
TACGAAGT	1.73
TACGAAG	1.73
TACCGT	1.73
TACCAGG	1.73
TAATCCC	1.73
TAATCCAG	1.73
TAAGGG	1.73
TAACTCGT	1.73
TAACTCG	1.73
TAACGGC	1.73
TAACAG	1.73
TAACAAAA	1.73
TAAATGC	1.73
TAAACCG	1.73
GTTTTTTT	1.73
GTTGTGGA	1.73
GTTGGCT	1.73
GTTCTA	1.73
GTTATTC	1.73
GTTAATC	1.73
GTGTCT	1.73
GTGTAAA	1.73
GTGGCGT	1.73
GTGGAGAA	1.73
GTGGAGA	1.73
GTGCCGGA	1.73
GTGCCGG	1.73
GTCTCG	1.73
GTCTCAA	1.73
GTCGGGG	1.73
GTCATTA	1.73
GTATTATG	1.73
GTAGCGGG	1.73
GTAGCGG	1.73
GTAGAGC	1.73
GTAAGT	1.73
GGGTGAG	1.73
GGGTAAG	1.73
GGGGCTTT	1.73
GGGGCTT	1.73
GGGCCG	1.73
GGGCAGGG	1.73
GGGATTTT	1.73
GGGATCG	1.73
GGGAGAG	1.73
GGGAATA	1.73
GGGAAGGC	1.73
GGCTTTA	1.73
GGCTCA	1.73
GGCGTATT	1.73
GGCGCTT	1.73
GGCCTTT	1.73
GGCCTT	1.73
GGCCTGG	1.73
GGCCCC	1.73
GGCAGGG	1.73
GGCAGGA	1.73
GGATTTTT	1.73
GGATCCGA	1.73
GGAGGA	1.73
GGAGAATA	1.73
GGAGAAT	1.73
GGACTG	1.73
GCTTGACT	1.73
GCTTGAC	1.73
GCTGGATT	1.73
GCGGGGG	1.73
GCGAAGCG	1.73
GCGAAGC	1.73
GCCTGCGG	1.73
GCCGTGG	1.73
GCCGGATC	1.73
GCCCTCG	1.73
GCCCGTT	1.73
GCCCCC	1.73
GCCATTTT	1.73
GCCAGAC	1.73
GCATAAA	1.73
GCAGGCC	1.73
GCACTTG	1.73
GCACTGCT	1.73
GCACCAG	1.73
GCACACCC	1.73
GCACACC	1.73
GCAATAA	1.73
GATTTTTT	1.73
GATTTCCC	1.73
GATTTCA	1.73
GATGGCCT	1.73
GATCCGAA	1.73
GATCCGA	1.73
GAGCGTC	1.73
GAGAATAA	1.73
GAGAATA	1.73
GAGAAAAA	1.73
GAGAAAA	1.73
GACTGAC	1.73
GACGACA	1.73
GACATAAT	1.73
GACAGAC	1.73
GACAAGG	1.73
GAAGTTTA	1.73
GAAGTGCC	1.73
GAAGCGGC	1.73
GAAGCGG	1.73
GAACTAAC	1.73
GAAATAA	1.73
CTTTTTTG	1.73
CTTTTCG	1.73
CTTTTAT	1.73
CTTTGAGC	1.73
CTTTGAG	1.73
CTTGCCA	1.73
CTTGACTC	1.73
CTTGACT	1.73
CTTCTA	1.73
CTTCAA	1.73
CTGTTGA	1.73
CTGTTAAT	1.73
CTGTAGCG	1.73
CTGCGGG	1.73
CTGCCC	1.73
CTGCAATT	1.73
CTGCAAT	1.73
CTGAGAAA	1.73
CTCGTTGT	1.73
CTCGTTG	1.73
CTCCTGC	1.73
CTCCCTT	1.73
CTCACCC	1.73
CTCAACG	1.73
CTAAGC	1.73
CTAACTCG	1.73
CTAACTC	1.73
CGTTGTGG	1.73
CGTTGTG	1.73
CGGTTTT	1.73
CGGGAAGG	1.73
CGGCCTC	1.73
CGCTGGAT	1.73
CGCTGAGA	1.73
CGCTGAG	1.73
CGCCTGT	1.73
CGCCATT	1.73
CGCACTT	1.73
CGAGTG	1.73
CGACGAT	1.73
CGACATAA	1.73
CGACATA	1.73
CGAAGTTT	1.73
CGAAGCGG	1.73
CGAAAAGA	1.73
CCTTGCT	1.73
CCTGCCA	1.73
CCTGATG	1.73
CCTCATT	1.73
CCTAA	1.73
CCGTTTT	1.73
CCGGTCA	1.73
CCGGCCT	1.73
CCGCTGAG	1.73
CCGCTCC	1.73
CCGCTA	1.73
CCGCGCCG	1.73
CCGCGCC	1.73
CCGCCT	1.73
CCGAAAAG	1.73
CCCTCTC	1.73
CCCTCATT	1.73
CCCGTTC	1.73
CCCGGCC	1.73
CCCGGCAT	1.73
CCCGCGCC	1.73
CCCGCCA	1.73
CCCCTT	1.73
CCCCTG	1.73
CCCCGCGC	1.73
CCCCCCCA	1.73
CCCCCCC	1.73
CCCCCCAG	1.73
CCCCCCA	1.73
CCCCCAGA	1.73
CCCCCAG	1.73
CCCAGAAG	1.73
CCCACC	1.73
CCATAT	1.73
CCAGAAGT	1.73
CATTTTTT	1.73
CATTACGA	1.73
CATAATCC	1.73
CATAATC	1.73
CATAAT	1.73
CAGCCCT	1.73
CAGCCATC	1.73
CAGACGC	1.73
CAGAAGTG	1.73
CAGAAGT	1.73
CACTGCTC	1.73
CACTGCT	1.73
CACCTC	1.73
CACCCT	1.73
CACCCCGC	1.73
CACCCCG	1.73
CACCAGC	1.73
CACATG	1.73
CACAGT	1.73
CACACCCC	1.73
CACACCC	1.73
CAATCG	1.73
CAATAAT	1.73
CAAGTC	1.73
ATTTTGT	1.73
ATTTCCCC	1.73
ATTGACGA	1.73
ATTCTTTG	1.73
ATTCAC	1.73
ATTATGCA	1.73
ATTATGC	1.73
ATTACGAA	1.73
ATTACGA	1.73
ATTACAAA	1.73
ATGCTTGA	1.73
ATGCCTG	1.73
ATGCCGT	1.73
ATGCACAC	1.73
ATGCACA	1.73
ATCTTTT	1.73
ATCGTCT	1.73
ATCCGAAA	1.73
ATCCGAA	1.73
ATCCAGCC	1.73
ATCCAAC	1.73
ATCCAA	1.73
ATCAAGC	1.73
ATATTC	1.73
ATAGTG	1.73
ATACCGA	1.73
ATAATTA	1.73
ATAATCCA	1.73
ATAACGT	1.73
ATAAACC	1.73
ATAAAAAA	1.73
AGTTGG	1.73
AGTTCAC	1.73
AGTGTAAA	1.73
AGTGTAA	1.73
AGTGCCGG	1.73
AGGGGCG	1.73
AGGGAAG	1.73
AGGCGGC	1.73
AGGAAGA	1.73
AGCTAAT	1.73
AGCGGCAC	1.73
AGCGGCA	1.73
AGCGAAGC	1.73
AGCCTGC	1.73
AGCCAGA	1.73
AGCACCA	1.73
AGAGGAT	1.73
AGACTGAC	1.73
AGAATAAC	1.73
AGAATAA	1.73
AGAATA	1.73
AGAAGTGC	1.73
AGAAGTG	1.73
AGAACTAA	1.73
ACTGTTAA	1.73
ACTCTGTA	1.73
ACTCGTTG	1.73
ACTCGTT	1.73
ACTAACTC	1.73
ACTAACT	1.73
ACGCCAC	1.73
ACGACATA	1.73
ACGAAGTT	1.73
ACGAAAGC	1.73
ACGAAAG	1.73
ACCTTGC	1.73
ACCGTCA	1.73
ACCCTT	1.73
ACCCCGCG	1.73
ACCCCGC	1.73
ACATAATC	1.73
ACATAAT	1.73
ACACCCCG	1.73
ACACCCC	1.73
ACAAAAAG	1.73
AATTACA	1.73
AATGGCGC	1.73
AATGCTTG	1.73
AATCTTT	1.73
AATCCAGC	1.73
AATACCA	1.73
AATAATTA	1.73
AATAATT	1.73
AATAATAA	1.73
AATAATA	1.73
AATAAAC	1.73
AAGTGCCG	1.73
AAGTGCC	1.73
AAGGCGTA	1.73
AAGCGGCA	1.73
AAGCGAAG	1.73
AAGATGTT	1.73
AAGATGT	1.73
AAGAACTA	1.73
AAGAAAAA	1.73
AACTGGT	1.73
AACTCGTT	1.73
AACTCGT	1.73
AACTAT	1.73
AACTAACT	1.73
AACTAAC	1.73
AACGGCT	1.73
AACATTGC	1.73
AACATTG	1.73
AACAGGG	1.73
AAATGCTT	1.73
AAATAAAA	1.73
AAAGCGAA	1.73
AAAGCAA	1.73
AAAGAAAA	1.73
AAAAGTGA	1.73
AAAAGCGA	1.73
AAAAACGG	1.73
ATTTC	1.72
GGGGT	1.71
TTGCCC	1.7
TGTAA	1.7
TACCA	1.7
GCCAC	1.7
AACGGC	1.7
CCGCC	1.67
AAAAAT	1.67
GCTT	1.67
TCTCTT	1.67
TAGCGT	1.67
GTCGCA	1.67
GGGCC	1.67
GGGAAT	1.67
GGCGGG	1.67
GCCGGG	1.67
GCAAGG	1.67
GATTCT	1.67
GAAAAG	1.67
CTTGCT	1.67
CGGCCT	1.67
CCGTTT	1.67
CACGTA	1.67
ATTACG	1.67
ATCTGT	1.67
AGTGT	1.67
AGGCGG	1.67
AGCGTC	1.67
ACTCGA	1.67
ACAGAC	1.67
AATCCC	1.67
AAAATGG	1.67
AAAATGA	1.67
CCTC	1.66
TTGAC	1.63
GCACT	1.63
ACCAG	1.63
AATCC	1.63
TTTATCA	1.63
TTTAATT	1.63
TTGCCCC	1.63
TTGCAC	1.63
TTCCGG	1.63
TTCCCCC	1.63
TGTGTG	1.63
TGCCCC	1.63
TGAGGG	1.63
TCTTTAA	1.63
TCTCAA	1.63
TCCGAA	1.63
TCCCCG	1.63
TCAGACA	1.63
TACAGG	1.63
TAATTTT	1.63
GTGTGGG	1.63
GTCTCT	1.63
GGTGGTG	1.63
GGTGAC	1.63
GGGGGC	1.63
GGGATTT	1.63
GGACGT	1.63
GCTGAG	1.63
GCCAGCG	1.63
GACGAAA	1.63
GACAAT	1.63
GAAAAGA	1.63
CTTTTAA	1.63
CTCTTTAA	1.63
CGGGCC	1.63
CGGGAAG	1.63
CGGATT	1.63
CGCCGCT	1.63
CGAAGT	1.63
CCTTTTT	1.63
CCTCTT	1.63
CCCTGC	1.63
CCCGCT	1.63
ATTTATC	1.63
ATTCAT	1.63
ATGGCCT	1.63
ATAATA	1.63
AGTTTA	1.63
AGTAATG	1.63
AGGGAT	1.63
AGACGA	1.63
ACGGAT	1.63
ACGAAAA	1.63
ACCCTCA	1.63
ACAGGA	1.63
ACACGT	1.63
ACAATC	1.63
AATGAATA	1.63
AATGAAT	1.63
AACAAAAA	1.63
AAAGAAA	1.63
AAACACGC	1.63
AAACACG	1.63
AAAACGG	1.63
TTAAC	1.62
TTAAA	1.62
ATTTA	1.62
AAAT	1.61
TACCG	1.61
GTTGG	1.61
GGCCG	1.61
ACACG	1.61
TCTTTT	1.6
GGGTG	1.6
CTTTTC	1.6
CTTGT	1.6
CTGTG	1.6
CCCCA	1.6
ACCCT	1.6
AATTTA	1.6
AATAG	1.6
GGCC	1.58
TAAC	1.55
CTGTT	1.54
TTTTAA	1.53
TAGCG	1.53
GCCTGA	1.53
CAAGG	1.53
ATCCC	1.53
GGGT	1.52
GAATA	1.51
CAGAC	1.51
TTTTAAA	1.51
TGCCTG	1.51
GTTAAT	1.51
GGGGCG	1.51
GGGAAG	1.51
GCCTGT	1.51
CTTTGA	1.51
CTTGCC	1.51
CTGTTG	1.51
CCAGCC	1.51
AGTGAA	1.51
AGAAAAA	1.51
AATTTAT	1.51
AACAAT	1.51
AAATGG	1.51
TTATTT	1.5
GAGGA	1.5
ATTTCC	1.5
AGGGAA	1.5
AGGCT	1.5
ACATT	1.5
AAAGAA	1.5
CATTT	1.46
ATAG	1.46
GTTG	1.44
TTATT	1.44
TTAAT	1.44
GGGAA	1.41
AGTAA	1.41
TTGAG	1.41
TCTTG	1.41
TCTCA	1.41
TCGTT	1.41
GGAGA	1.41
ACGGA	1.41
TTTGCCC	1.41
TTGGCT	1.41
TTCATT	1.41
TTAGCC	1.41
TCTTGC	1.41
TCTTAA	1.41
TCGAG	1.41
TCCTGC	1.41
TCCCCC	1.41
TATTTTT	1.41
TAATTA	1.41
GTGTGG	1.41
GTGGGC	1.41
GTAATC	1.41
GGGCTT	1.41
GGGCAG	1.41
GGGATT	1.41
GGCCGG	1.41
GCGCAC	1.41
GAGTAA	1.41
GAGGAT	1.41
GAGCGT	1.41
GAAGATA	1.41
CTTAG	1.41
CTTAACG	1.41
CTGGTA	1.41
CTGATA	1.41
CGTAAT	1.41
CGGGCA	1.41
CGGCAT	1.41
CGCCGGG	1.41
CGACAT	1.41
CCATTT	1.41
CATAAA	1.41
ATTTTGC	1.41
ATGCCT	1.41
AGCCCT	1.41
AGATACG	1.41
AGATAC	1.41
AGAGTT	1.41
AGAGGA	1.41
AGACT	1.41
ACGTCGC	1.41
ACGTCG	1.41
ACGAAG	1.41
AATTTTT	1.41
AATGTT	1.41
AAGATACG	1.41
AAGATAC	1.41
AAAGCA	1.41
AAAAATGG	1.41
TTTTTTTG	1.41
TTTTTGGG	1.41
TTTTTGG	1.41
TTTTTGA	1.41
TTTTTCAG	1.41
TTTTTCA	1.41
TTTTTATG	1.41
TTTTTATC	1.41
TTTTTAGC	1.41
TTTTGTA	1.41
TTTTGGGG	1.41
TTTTGGG	1.41
TTTTGAAT	1.41
TTTTGAA	1.41
TTTTCGC	1.41
TTTTCCG	1.41
TTTTCCCC	1.41
TTTTCAGC	1.41
TTTTATGA	1.41
TTTTATCG	1.41
TTTTAATC	1.41
TTTGTTA	1.41
TTTGGTG	1.41
TTTGGCCC	1.41
TTTGCCCC	1.41
TTTGAGCG	1.41
TTTGAGCA	1.41
TTTGACAG	1.41
TTTCTCTT	1.41
TTTCTCT	1.41
TTTCGCT	1.41
TTTCCTTG	1.41
TTTCCTGA	1.41
TTTCCTG	1.41
TTTCCTCC	1.41
TTTCCGGC	1.41
TTTCCGG	1.41
TTTATTTC	1.41
TTTATTCC	1.41
TTTATTC	1.41
TTTATAA	1.41
TTTAGT	1.41
TTTACTGA	1.41
TTTAATCA	1.41
TTTAAAG	1.41
TTTAAAAC	1.41
TTGTAATC	1.41
TTGTAAT	1.41
TTGGTCGC	1.41
TTGGTAGA	1.41
TTGGCTT	1.41
TTGGCCCC	1.41
TTGCTGGC	1.41
TTGCGGTT	1.41
TTGCGAG	1.41
TTGCCCGG	1.41
TTGCCCCC	1.41
TTGCCATA	1.41
TTGCCAT	1.41
TTGCCAGT	1.41
TTGCCAC	1.41
TTGCATCA	1.41
TTGCATC	1.41
TTGCACC	1.41
TTGATTTC	1.41
TTGAGTAA	1.41
TTGAGGT	1.41
TTGAGGG	1.41
TTGAGCGT	1.41
TTGAGCAT	1.41
TTGAGCA	1.41
TTGACGAC	1.41
TTGACAGG	1.41
TTCTTATC	1.41
TTCTGGTT	1.41
TTCGAGTC	1.41
TTCGAGT	1.41
TTCGACA	1.41
TTCCTGA	1.41
TTCCTCTC	1.41
TTCCCTCT	1.41
TTCCCTC	1.41
TTCCCCG	1.41
TTCCAGC	1.41
TTCATGC	1.41
TTCATG	1.41
TTCAGCC	1.41
TTCACCT	1.41
TTCAAGA	1.41
TTATTTA	1.41
TTATGCC	1.41
TTATCTCA	1.41
TTAGTG	1.41
TTAGCTCA	1.41
TTAGCTC	1.41
TTAGCGTA	1.41
TTAGCCGC	1.41
TTAGCCG	1.41
TTAGCAC	1.41
TTACTGA	1.41
TTACTA	1.41
TTACGCCC	1.41
TTACCCTT	1.41
TTACCAG	1.41
TTACACGG	1.41
TTACAAAG	1.41
TTAATTAA	1.41
TTAATGG	1.41
TTAATCCC	1.41
TTAAAGA	1.41
TTAAACC	1.41
TTAAAAC	1.41
TGTTTAA	1.41
TGTTGGCT	1.41
TGTTGGC	1.41
TGTTGCT	1.41
TGTTGAC	1.41
TGTTGAAA	1.41
TGTTCCT	1.41
TGTTAGC	1.41
TGTTAG	1.41
TGTTACG	1.41
TGTTAATC	1.41
TGTGTCC	1.41
TGTGTA	1.41
TGTGCGC	1.41
TGTCCGA	1.41
TGTCAGTG	1.41
TGTCAGT	1.41
TGTAGA	1.41
TGTACC	1.41
TGTAATG	1.41
TGTAATCA	1.41
TGTAAAT	1.41
TGTAAAAG	1.41
TGTAAAA	1.41
TGGTTCAA	1.41
TGGTTCA	1.41
TGGTGGTG	1.41
TGGTGATT	1.41
TGGTAGAG	1.41
TGGGGTGG	1.41
TGGGGTG	1.41
TGGGGAG	1.41
TGGGATCG	1.41
TGGGATC	1.41
TGGCGTT	1.41
TGGCGGG	1.41
TGGCGCTT	1.41
TGGCGAAG	1.41
TGGCCGT	1.41
TGGCCCC	1.41
TGGCCAT	1.41
TGGACA	1.41
TGCTTTCT	1.41
TGCTTTC	1.41
TGCTGTGG	1.41
TGCTGTG	1.41
TGCTGGCG	1.41
TGCTGAG	1.41
TGCGGGCC	1.41
TGCGGGA	1.41
TGCGGCGG	1.41
TGCGCGT	1.41
TGCCGTGG	1.41
TGCCCGTT	1.41
TGCCCGG	1.41
TGCCCCC	1.41
TGCCCAC	1.41
TGCCATAG	1.41
TGCCATA	1.41
TGCCAGG	1.41
TGCATTTG	1.41
TGCAGCCA	1.41
TGCAGCC	1.41
TGCACTTG	1.41
TGCACTT	1.41
TGCAATTT	1.41
TGATTTTT	1.41
TGATCGT	1.41
TGATCAA	1.41
TGATATA	1.41
TGATAG	1.41
TGATAAC	1.41
TGAGTGG	1.41
TGAGGT	1.41
TGAGGGAT	1.41
TGAGCGTC	1.41
TGAGCAT	1.41
TGAGAG	1.41
TGACTTTT	1.41
TGACGACA	1.41
TGACGAC	1.41
TGACGAA	1.41
TGACATTG	1.41
TGACATT	1.41
TGACAGG	1.41
TGACAGA	1.41
TGACAAG	1.41
TGAACTAA	1.41
TGAAAAAT	1.41
TCTTTTCG	1.41
TCTTTTA	1.41
TCTTTCC	1.41
TCTTGCG	1.41
TCTTCACT	1.41
TCTTCAC	1.41
TCTTACA	1.41
TCTTAC	1.41
TCTGTTG	1.41
TCTGGTTT	1.41
TCTGGGT	1.41
TCTGGGA	1.41
TCTGGCAG	1.41
TCTCTTC	1.41
TCTCGATT	1.41
TCTCACCC	1.41
TCTCACC	1.41
TCTCAAGA	1.41
TCTCAAG	1.41
TCTCAACG	1.41
TCGTTC	1.41
TCGTCTTG	1.41
TCGTCTT	1.41
TCGGTTT	1.41
TCGGTT	1.41
TCGGTATC	1.41
TCGGTAG	1.41
TCGGGT	1.41
TCGGGGG	1.41
TCGGCGCT	1.41
TCGCTGTT	1.41
TCGCTGT	1.41
TCGCGGGG	1.41
TCGCGGG	1.41
TCGCCGGA	1.41
TCGCAACT	1.41
TCGATTG	1.41
TCGAGTC	1.41
TCGAGT	1.41
TCGAGCG	1.41
TCGACAT	1.41
TCCTTGCT	1.41
TCCTGCGC	1.41
TCCTCTG	1.41
TCCGCCA	1.41
TCCCTTTC	1.41
TCCCTTT	1.41
TCCCCT	1.41
TCCCAA	1.41
TCCATCA	1.41
TCCATAT	1.41
TCCAGT	1.41
TCCACCT	1.41
TCCAACA	1.41
TCATTTTA	1.41
TCATTTT	1.41
TCATTAT	1.41
TCATTAAT	1.41
TCATTAA	1.41
TCATGCC	1.41
TCAGTTGG	1.41
TCAGTGAT	1.41
TCAGTGA	1.41
TCAGTAAT	1.41
TCAGGGAC	1.41
TCAGAGGA	1.41
TCAGAGG	1.41
TCACTCT	1.41
TCACTCG	1.41
TCAATCG	1.41
TCAAGCC	1.41
TCAAGAGT	1.41
TCAACGCC	1.41
TCAACAGG	1.41
TCAACAG	1.41
TATTTTTT	1.41
TATTTCC	1.41
TATTCGG	1.41
TATTCCT	1.41
TATGCCT	1.41
TATGCCG	1.41
TATGAAT	1.41
TATCTTAC	1.41
TATCTCA	1.41
TATCCCAA	1.41
TATCCA	1.41
TATACCG	1.41
TATACC	1.41
TATAAG	1.41
TAGTTTG	1.41
TAGTTG	1.41
TAGTCTGC	1.41
TAGTCTG	1.41
TAGTCT	1.41
TAGGTT	1.41
TAGCTCAG	1.41
TAGCGTCG	1.41
TAGCGCA	1.41
TAGCCTGC	1.41
TAGCCGCC	1.41
TAGCCGC	1.41
TAGCACCA	1.41
TAGCACC	1.41
TAGAGTTT	1.41
TAGAGTT	1.41
TAGAGT	1.41
TAGAGCA	1.41
TACTTCA	1.41
TACTGGAA	1.41
TACTGGA	1.41
TACGCCC	1.41
TACCGAA	1.41
TACCCTT	1.41
TACCAGC	1.41
TACCAAGT	1.41
TACAGAG	1.41
TACACGG	1.41
TACAAAAT	1.41
TAATTAC	1.41
TAATGTT	1.41
TAATGCC	1.41
TAATGAC	1.41
TAATCTT	1.41
TAATCTC	1.41
TAATCG	1.41
TAATCCCC	1.41
TAATCAGC	1.41
TAATACCG	1.41
TAATACC	1.41
TAATAAAC	1.41
TAAGTTT	1.41
TAAGTTCA	1.41
TAAGTTC	1.41
TAAGTA	1.41
TAAGGGTA	1.41
TAAGGGT	1.41
TAAGGGA	1.41
TAAGATTC	1.41
TAAGATG	1.41
TAACTGT	1.41
TAACTGGT	1.41
TAACTAT	1.41
TAACGGCT	1.41
TAACCGG	1.41
TAACCCTC	1.41
TAACCCT	1.41
TAACAGG	1.41
TAAATGCT	1.41
TAAATAA	1.41
TAAAGTG	1.41
TAAAGGC	1.41
TAAAGATT	1.41
TAAACCGT	1.41
TAAAAGG	1.41
TAAAAGAG	1.41
TAAAAATT	1.41
GTTTTTA	1.41
GTTTTGTT	1.41
GTTTTGT	1.41
GTTTTG	1.41
GTTTTCCT	1.41
GTTTTAA	1.41
GTTTGCTT	1.41
GTTTGAT	1.41
GTTTCCTC	1.41
GTTTCCT	1.41
GTTTAAA	1.41
GTTGTAA	1.41
GTTGGTAG	1.41
GTTGGTA	1.41
GTTGGCTT	1.41
GTTGGCG	1.41
GTTGGCC	1.41
GTTGAGG	1.41
GTTGACT	1.41
GTTGACAG	1.41
GTTGACA	1.41
GTTCTGTT	1.41
GTTCTGT	1.41
GTTCTAT	1.41
GTTCGAGT	1.41
GTTCGAG	1.41
GTTCACTC	1.41
GTTAGCGT	1.41
GTTACAAC	1.41
GTTAATTA	1.41
GTTAAGCA	1.41
GTTAACCG	1.41
GTGTCTT	1.41
GTGTCC	1.41
GTGTAT	1.41
GTGTAAAA	1.41
GTGGTGGT	1.41
GTGGTGGC	1.41
GTGGTGAT	1.41
GTGGGGGT	1.41
GTGGCTGG	1.41
GTGGCGTT	1.41
GTGGCGGA	1.41
GTGCTGA	1.41
GTGCGCG	1.41
GTGAGTGG	1.41
GTCTTGC	1.41
GTCTTGA	1.41
GTCTGCC	1.41
GTCTCTG	1.41
GTCTCGA	1.41
GTCTCAAG	1.41
GTCGTT	1.41
GTCGGGGT	1.41
GTCGGCG	1.41
GTCCGCCA	1.41
GTCCGCC	1.41
GTCCGA	1.41
GTCATTAT	1.41
GTCAGTG	1.41
GTCAAACT	1.41
GTCAAAC	1.41
GTATAAC	1.41
GTATAA	1.41
GTAGAGCA	1.41
GTACTCTG	1.41
GTACCAGG	1.41
GTACCAG	1.41
GTACCA	1.41
GTACAA	1.41
GTAATCAG	1.41
GTAAGTT	1.41
GTAACGGC	1.41
GTAAATC	1.41
GTAAAAGG	1.41
GGTTTTTT	1.41
GGTTTTCT	1.41
GGTTTTC	1.41
GGTTGTGG	1.41
GGTTGTG	1.41
GGTTCGA	1.41
GGTTCAA	1.41
GGTTACA	1.41
GGTGGTGG	1.41
GGTGGCGT	1.41
GGTGCTGG	1.41
GGTGATT	1.41
GGTGACG	1.41
GGTAGAGC	1.41
GGTAGAG	1.41
GGTACAG	1.41
GGTACA	1.41
GGTAAGAT	1.41
GGTAAGA	1.41
GGGTTTTT	1.41
GGGTTGTG	1.41
GGGTGGT	1.41
GGGTGGCG	1.41
GGGTGGC	1.41
GGGTAC	1.41
GGGGTTTT	1.41
GGGGTGG	1.41
GGGGTGA	1.41
GGGGGTTT	1.41
GGGGGTTG	1.41
GGGGGGA	1.41
GGGGGCTT	1.41
GGGGGCT	1.41
GGGGGAT	1.41
GGGGGAG	1.41
GGGGCAA	1.41
GGGGATGT	1.41
GGGGAGG	1.41
GGGGAGAG	1.41
GGGCCGTT	1.41
GGGCCGT	1.41
GGGCATTT	1.41
GGGCATT	1.41
GGGCAT	1.41
GGGCAGGA	1.41
GGGATTTA	1.41
GGGATGTT	1.41
GGGATGT	1.41
GGGAGGAT	1.41
GGGAGGA	1.41
GGGAGAGG	1.41
GGGACGT	1.41
GGGAATAG	1.41
GGGAAATA	1.41
GGGAAAT	1.41
GGCTTTTA	1.41
GGCTTTAT	1.41
GGCTTAG	1.41
GGCTGCA	1.41
GGCTAACT	1.41
GGCTAAC	1.41
GGCGTTT	1.41
GGCGGGG	1.41
GGCGGCGC	1.41
GGCGCTTT	1.41
GGCCTTTT	1.41
GGCCTGGT	1.41
GGCCTGCG	1.41
GGCCTCAG	1.41
GGCCTCA	1.41
GGCCGTA	1.41
GGCCCCT	1.41
GGCCAT	1.41
GGCCAGCG	1.41
GGCCAGC	1.41
GGCATTTT	1.41
GGCATTAA	1.41
GGCATAG	1.41
GGCATAAA	1.41
GGCATAA	1.41
GGCAGGCC	1.41
GGCAAGG	1.41
GGATTTGG	1.41
GGATTTG	1.41
GGATTTA	1.41
GGATGTTG	1.41
GGATGAG	1.41
GGATAGT	1.41
GGATAG	1.41
GGAGGG	1.41
GGAGGATT	1.41
GGAGGAT	1.41
GGAGATTG	1.41
GGAGATT	1.41
GGACTGG	1.41
GGACGTG	1.41
GGACGGG	1.41
GGACGCCT	1.41
GGAATAG	1.41
GGAAGCC	1.41
GGAAATAA	1.41
GGAAACT	1.41
GCTTTAC	1.41
GCTTCTAA	1.41
GCTTCTA	1.41
GCTTCGT	1.41
GCTTATTT	1.41
GCTGTGG	1.41
GCTGTAC	1.41
GCTGTAAT	1.41
GCTGGCTC	1.41
GCTGACA	1.41
GCTCAGTT	1.41
GCTCAGT	1.41
GCTAATA	1.41
GCTAAGG	1.41
GCGTCTC	1.41
GCGTCAAA	1.41
GCGTCAA	1.41
GCGTAGC	1.41
GCGGTTTT	1.41
GCGGTGGT	1.41
GCGGTAGT	1.41
GCGGGGA	1.41
GCGGGCA	1.41
GCGGGAAT	1.41
GCGGCTTT	1.41
GCGGCGGG	1.41
GCGGCGCG	1.41
GCGGATAT	1.41
GCGGATA	1.41
GCGGACTG	1.41
GCGGACT	1.41
GCGCTTTT	1.41
GCGCGGA	1.41
GCGCCATT	1.41
GCGCCATC	1.41
GCGCACTT	1.41
GCGCACA	1.41
GCGATTCC	1.41
GCGATTC	1.41
GCGATAC	1.41
GCGAATG	1.41
GCCTGTT	1.41
GCCTGTGT	1.41
GCCTGTG	1.41
GCCTGGGA	1.41
GCCTGGG	1.41
GCCTGCCA	1.41
GCCTGCC	1.41
GCCTGATG	1.41
GCCTGATC	1.41
GCCTGACG	1.41
GCCTCAGG	1.41
GCCTCAG	1.41
GCCGTTTT	1.41
GCCGTGGT	1.41
GCCGTAC	1.41
GCCGGACG	1.41
GCCGGAC	1.41
GCCGCTA	1.41
GCCCTGG	1.41
GCCCTCTC	1.41
GCCCTCT	1.41
GCCCTCGC	1.41
GCCCGGT	1.41
GCCCGCT	1.41
GCCCCTGC	1.41
GCCCCTG	1.41
GCCCCCG	1.41
GCCATCTG	1.41
GCCATAG	1.41
GCCAGTCT	1.41
GCCAGGG	1.41
GCCAGGC	1.41
GCCAGCGC	1.41
GCCAGACC	1.41
GCCACTAA	1.41
GCCACG	1.41
GCCACA	1.41
GCCAAATG	1.41
GCCAAAT	1.41
GCATTTGT	1.41
GCATTAAA	1.41
GCATCGCC	1.41
GCATCAAC	1.41
GCATAG	1.41
GCAGGCGG	1.41
GCAGGCCT	1.41
GCAGAAC	1.41
GCACTTGC	1.41
GCACTTC	1.41
GCACTGTT	1.41
GCACTGT	1.41
GCACGACC	1.41
GCACGAC	1.41
GCACCAGG	1.41
GCACAACC	1.41
GCACAAC	1.41
GCAATAAT	1.41
GCAAGGCG	1.41
GCAAGGA	1.41
GCAACTGT	1.41
GCAAATC	1.41
GATTTCCT	1.41
GATTTAT	1.41
GATTGAAC	1.41
GATTCACC	1.41
GATTCAC	1.41
GATTAGCC	1.41
GATTAGC	1.41
GATGTTGT	1.41
GATGGCGG	1.41
GATGCGC	1.41
GATGAGG	1.41
GATCAAGC	1.41
GATCAAG	1.41
GATATA	1.41
GATAGT	1.41
GATACCG	1.41
GATACC	1.41
GATAAGG	1.41
GATAAAGT	1.41
GAGTTTG	1.41
GAGTCC	1.41
GAGTAATG	1.41
GAGTAACG	1.41
GAGGGGG	1.41
GAGGGG	1.41
GAGGGATT	1.41
GAGGGAT	1.41
GAGGCGG	1.41
GAGGATA	1.41
GAGGAAA	1.41
GAGGAA	1.41
GAGCGTCA	1.41
GAGCCAGC	1.41
GAGCATC	1.41
GAGAGTC	1.41
GAGAGCG	1.41
GAGACG	1.41
GAGAACA	1.41
GAGAAAGC	1.41
GACTTTT	1.41
GACTGTTA	1.41
GACTGACT	1.41
GACTACA	1.41
GACTAA	1.41
GACGCTCA	1.41
GACGCTC	1.41
GACGCCTG	1.41
GACGATGA	1.41
GACGATG	1.41
GACGACAT	1.41
GACCTTG	1.41
GACCCT	1.41
GACATTG	1.41
GACAGGGG	1.41
GACAGGC	1.41
GACAACAA	1.41
GAATGGCG	1.41
GAATAG	1.41
GAATACCA	1.41
GAAGGGG	1.41
GAAGCAC	1.41
GAAGAGGA	1.41
GAAAGCAA	1.41
GAAAAAGG	1.41
CTTTTTTC	1.41
CTTTTCGG	1.41
CTTTTCCG	1.41
CTTTTATT	1.41
CTTTTAAA	1.41
CTTTGAT	1.41
CTTTCCT	1.41
CTTTATTT	1.41
CTTGCTTC	1.41
CTTGCTA	1.41
CTTGCCCG	1.41
CTTGATGG	1.41
CTTCTAA	1.41
CTTCCC	1.41
CTTCCAT	1.41
CTTCACT	1.41
CTTATTT	1.41
CTTAGCCT	1.41
CTGTTGAA	1.41
CTGTTCG	1.41
CTGTTCCT	1.41
CTGTTCA	1.41
CTGTTAT	1.41
CTGTGG	1.41
CTGTACT	1.41
CTGGTAG	1.41
CTGGGATC	1.41
CTGGGAT	1.41
CTGGCTC	1.41
CTGGACA	1.41
CTGCTAC	1.41
CTGCGGGC	1.41
CTGCGCGT	1.41
CTGCCTGA	1.41
CTGCCGT	1.41
CTGCCCG	1.41
CTGCCAGG	1.41
CTGCATTT	1.41
CTGCATT	1.41
CTGATGCG	1.41
CTGATGC	1.41
CTGATCGT	1.41
CTGATAAC	1.41
CTCTTTC	1.41
CTCTTCA	1.41
CTCTGGGT	1.41
CTCTGGG	1.41
CTCTCAAC	1.41
CTCTCAA	1.41
CTCGCTT	1.41
CTCGCT	1.41
CTCGATTG	1.41
CTCCTGCC	1.41
CTCAGTTG	1.41
CTCAGTT	1.41
CTCAGT	1.41
CTCAGAC	1.41
CTCACGA	1.41
CTCAAGAG	1.41
CTCAAGA	1.41
CTCAACGC	1.41
CTATGAC	1.41
CTATCTT	1.41
CTAGG	1.41
CTACGA	1.41
CTACAGGA	1.41
CTACAGG	1.41
CTAATTT	1.41
CTAATACC	1.41
CTAATAC	1.41
CTAATAAA	1.41
CTAATAA	1.41
CTAAGG	1.41
CTAAGCC	1.41
CTAACCC	1.41
CTAAAG	1.41
CGTTTTTT	1.41
CGTTTTT	1.41
CGTTTA	1.41
CGTTGTA	1.41
CGTTCACT	1.41
CGTTCAC	1.41
CGTTAATT	1.41
CGTGTC	1.41
CGTGGTGG	1.41
CGTGGTG	1.41
CGTCTTG	1.41
CGTCTGA	1.41
CGTCTCC	1.41
CGTCATTA	1.41
CGTCATT	1.41
CGTCAT	1.41
CGTCAAAC	1.41
CGTAGCA	1.41
CGGTGGCG	1.41
CGGGGGG	1.41
CGGGGGC	1.41
CGGGGAG	1.41
CGGGCCG	1.41
CGGGCATT	1.41
CGGGCAT	1.41
CGGGCAGG	1.41
CGGGAATA	1.41
CGGGAAT	1.41
CGGCTTTT	1.41
CGGCTAAC	1.41
CGGCTAA	1.41
CGGCGGTT	1.41
CGGCGGGG	1.41
CGGCGGCG	1.41
CGGCGCT	1.41
CGGCGCGG	1.41
CGGCGCG	1.41
CGGCCTCA	1.41
CGGCATG	1.41
CGGCATA	1.41
CGGATATT	1.41
CGGACTG	1.41
CGGACT	1.41
CGCTTTTT	1.41
CGCTTGT	1.41
CGCGTTG	1.41
[truncated: 29,929 more rows]
