# Supplementary material for: Hfq CLASH uncovers sRNA-target interaction networks linked to nutrient availability adaptation
Source: eLife. 2020 May 1;9:e54655. doi: 10.7554/eLife.54655 (PMC7213987; doi:10.7554/eLife.54655)
Supplement: Supplementary file 10. [file elife-54655-supp10.xlsx]

## Sheet: E_coli_strains
Supplementary Table 3.1. Bacterial strains used in this study.
		Strain	Genotype	Reference
		E.coli K12 MG1655	F- lambda- rph-1	Blattner et al., 1997
		E.coli K12 MG1655 hfq::HTF	MG1655 hfq::HTF	Tree et al., 2014
		TOP10F'	F′ [lacIq, Tn10(TetR)] mcrA Δ(mrr-hsdRMS-mcrBC) φ80lacZΔM15 ΔlacX74 recA1 araD139 Δ(ara-leu)7697 galU galK rpsL(StrR) endA1 nupG	Invitrogen

## Sheet: Supplementary File 10
Supplementary File 10
		Ultramer	Sequence (5' → 3')
	983	arcZ_ZA21	GTGCGGCCTGAAAAACAGTGCTGTGCCCTTGTAACTCATCATAATAATTTACGGCGCAGCCAAGATTTCCCTGGTGTTGGCGCAGTATTCGCGCACCCCGGTCTAGCCGGGGTCATTTTTTGGTACGCGTGCTAGAGGCATC
	982	cyaR_ZA21	GCTGAAAAACATAACCCATAAAATGCTAGCTGTACCAGGAACCACCTCCTTAGCCTGTGTAATCTCCCTTACACGGGCTTATTTTTTGGTACGCGTGCTAGAGGCATC
		CyaR_SM_C38C39_pZA21	GCTGAAAAACATAACCCATAAAATGCTAGCTGTAGGAGGAACCACCTCCTTAGCCTGTGTAATCTCCCTTACACGGGCTTATTTTTTGGTACGCGTGCTAGAGGCATC
	984	arcZ_ZE21_F	GTGCGGCCTGAAAAACAGTGCTGTGCCCTTGTAACTCATCATAATAATTTACGGCGCAGCCAAGATTTCCCTGGTGTTGGCGCAGTATTCGCGCACCCCGGTCTAGCCGGGGTCATTTTTTGGCATCAAATAAAACGAAAG
		ArcZ_SM_G70G71_pZE12	GTGCGGCCTGAAAAACAGTGCTGTGCCCTTGTAACTCATCATAATAATTTACGGCGCAGCCAAGATTTCCCTCCTGTTGGCGCAGTATTCGCGCACCCCGGTCTAGCCGGGGTCATTTTTTGGCATCAAATAAAACGAAAG
	985	cyaR_ZE21_F	GCTGAAAAACATAACCCATAAAATGCTAGCTGTACCAGGAACCACCTCCTTAGCCTGTGTAATCTCCCTTACACGGGCTTATTTTTTGGCATCAAATAAAACGAAAG
		Oigos used for Northern Blot
		Oligonucleotide	Sequence (5' → 3')	Purpose
	641	anti-malG14	GCGGCATAACATTGGCAGAAC	Northern probe for MdoR
	643	anti-5S	CTACGGCGTTTCACTTCTGAGTTC	Northern probe for 5S rRNA
	644	anti-INT_0_2492	GGCAACGAAGGGTTCTACT	Northern probe for gadE 3UTR derived sRNA candidate (GadF)
	645	anti-INT_0_1913	GAAGACAGGCTTCGGGGTCA	Northern probe for ygaM 3UTR derived sRNA candidate (YgaN)
	728	NB probe RybB	GTTGATGGGCTCCACAA	Northern probe for RybB
	1030	cyaR_R_1	TGTAAGGGAGATTACACAGGCTAAGGA	Norrthern probe for CyaR
	1032	arcZ_R_1	TAGACCGGGGTGCGCGAATA	Norrthern probe for ArcZ
		RT and qPCR oligos
		Oligonucleotide	Sequence (5' → 3')	Purpose
	916	rrfD 1 F	CGGTGGTCCCACCTGACC	Forward primer for RT-qPCR quantification of rrfD (5S rRNA)
	917	rrfD 1 R	CCTACTCTCGCATGGGGAGACC	Reverse primer for RT-qPCR quantification of rrfD (5S rRNA)
	1023	tpx_F_1	TGCGCCGCATCAGTACGTAA	Forward primer for RT-qPCR quantification of tpx
	1024	tpx_R_1	GCAGAAACGAGACTGGGCGA	Reverse primer for RT-qPCR quantification of tpx
	1025	sdaC_F_1	GCACGTGAAGGCTTCAACGG	Forward primer for RT-qPCR quantification of sdaC
	1026	sdaC_R_1	CCAGCATGAACAGCGCAGTG	Reverse primer for RT-qPCR quantification of sdaC
	1027	yqaE_F_1	CGTGCTGCTCGGTAAAGGGT	Forward primer for RT-qPCR quantification of yqaE
	1028	yqaE_R_1	GTTTGCACCCAGAACGCGTG	Reverse primer for RT-qPCR quantification of yqaE
	1029	cyaR_F_1	ACATAACCCATAAAATGCTAGCTGTACCA	Forward primer for RT-qPCR quantification of CyaR and CyaR.anti-G1 mutant
	1030	cyaR_R_1	TGTAAGGGAGATTACACAGGCTAAGGA	Reverse primer for RT-qPCR quantification of CyaR, CyaR 38-39 mutant and CyaR.anti-G1 mutant
	1031	arcZ_F_1	ACAGTGCTGTGCCCTTGTAACT	Forward primer for RT-qPCR quantification of ArcZ and ArcZ 70-71 mutant
	1032	arcZ_R_1	TAGACCGGGGTGCGCGAATA	Reverse primer for RT-qPCR quantification of ArcZ and ArcZ 70-71 mutant
	1037	nadE_F_1	GCACTCGGCGTGACCTATGA	Forward primer for RT-qPCR quantification of nadE
	1038	nadE_R_1	GCGGACGGCGTTTATGTTCG	Reverse primer for RT-qPCR quantification of nadE
	1204	cyaR_38-39 F1	ACATAACCCATAAAATGCTAGCTGTAGGA	Forward primer for RT-qPCR quantification of CyaR 38-39 mutant; used with 1030
		Oiigos used in cloning procedures
		Oligonucleotide	Sequence (5' → 3')	Purpose
	980	pZE12_5P_rev	5P-GTGCTCAGTATCTTGTTATCC	reverse primer to clone sRNAs into pZE12luc
	695	PZE-A	GTGCCACCTGACGTCTAAGA	check inserts in pZE12-luc derived backbone
	887	pZA21MCS_5P_rev	5P-GTGCTCAGTATCTCTATCACTGA	reverse primer to clone sRNAs into pZA21
	879	pZA21MCS_fwd	GTTTTTAAGCTTGGTACGCGTGCTAGAGGCATC	forward primer to generate no sRNA control for pZA21-expressed sRNAs
	880	pZA21MCS_seq_sense	CTCGAGTCCCTATCAGTGATAGAGA	forward sequencing primer for pZA21 constructs
